# Supplementary material for: Supplementation with short-chain fatty acids and a prebiotic improves clinical outcome in Parkinson’s disease: a randomized double-blind prospective study
Source: Springer Nature journal article supplement (doi:10.1038/s41598-025-29692-x), 2025-12-05
Supplement: MOESM7 [file 41598_2025_29692_MOESM7_ESM.pdf › 41598_2025_29692_MOESM7_ESM.pdf]

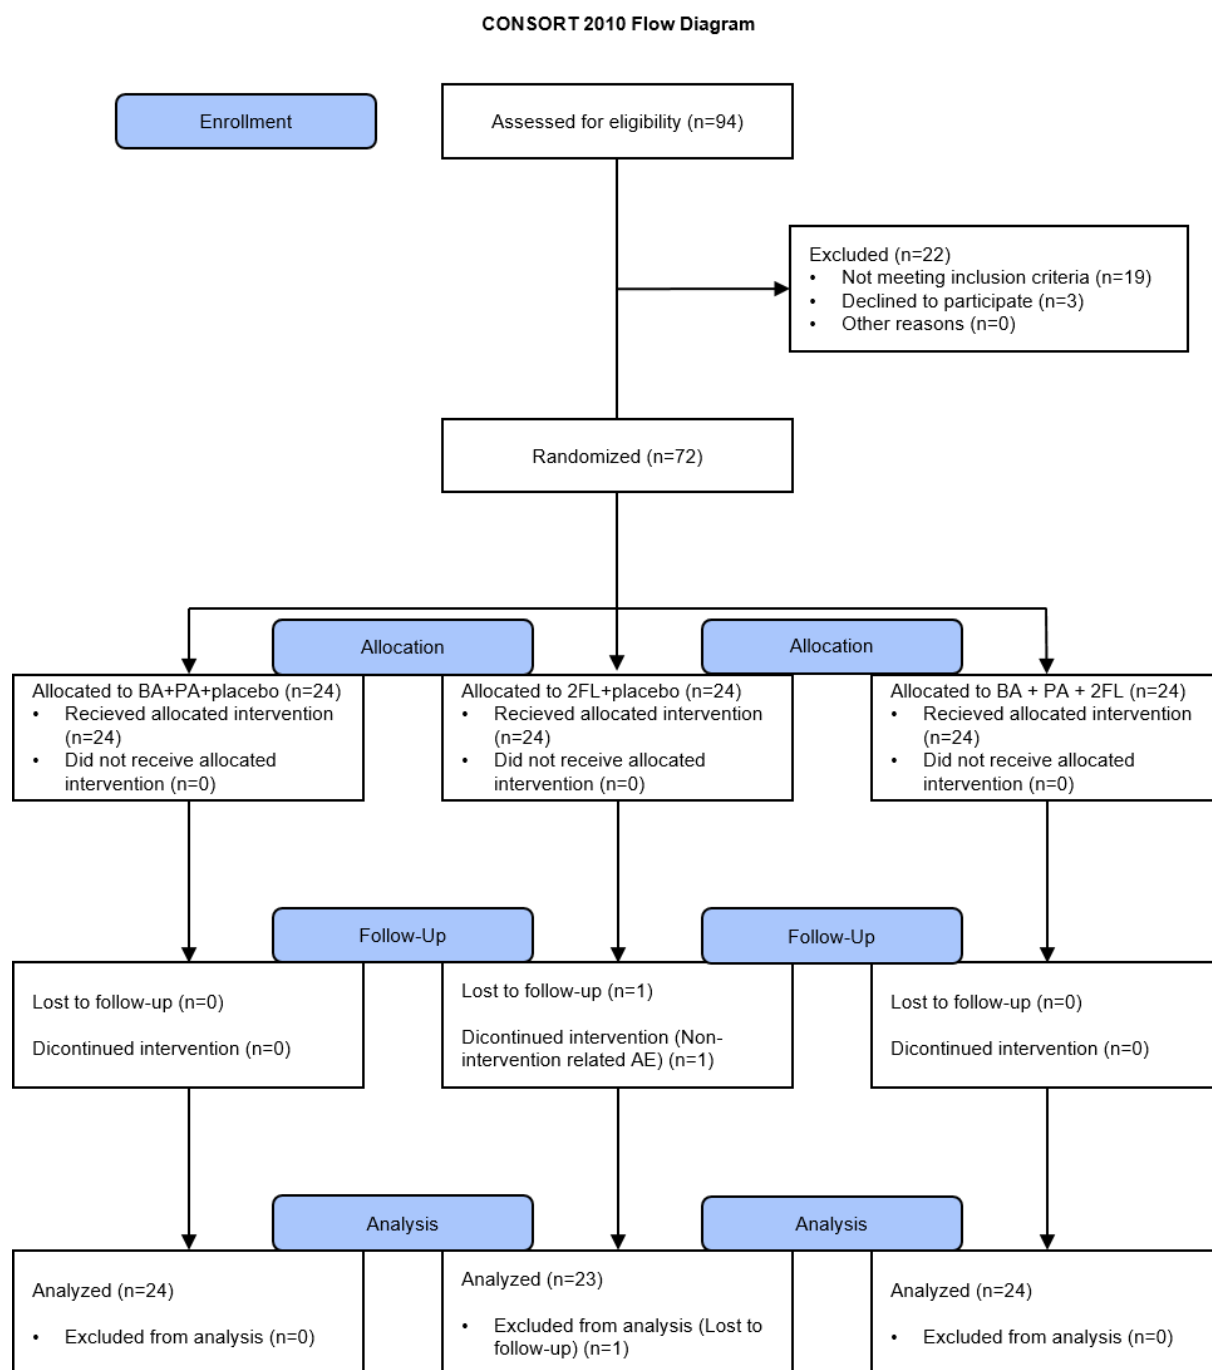

**Supplementary Fig. S1. CONSORT 2010 flow diagram.** CONSolidated Standards of Reporting Trials: Schematic representation of the randomized double-blind prospective study.

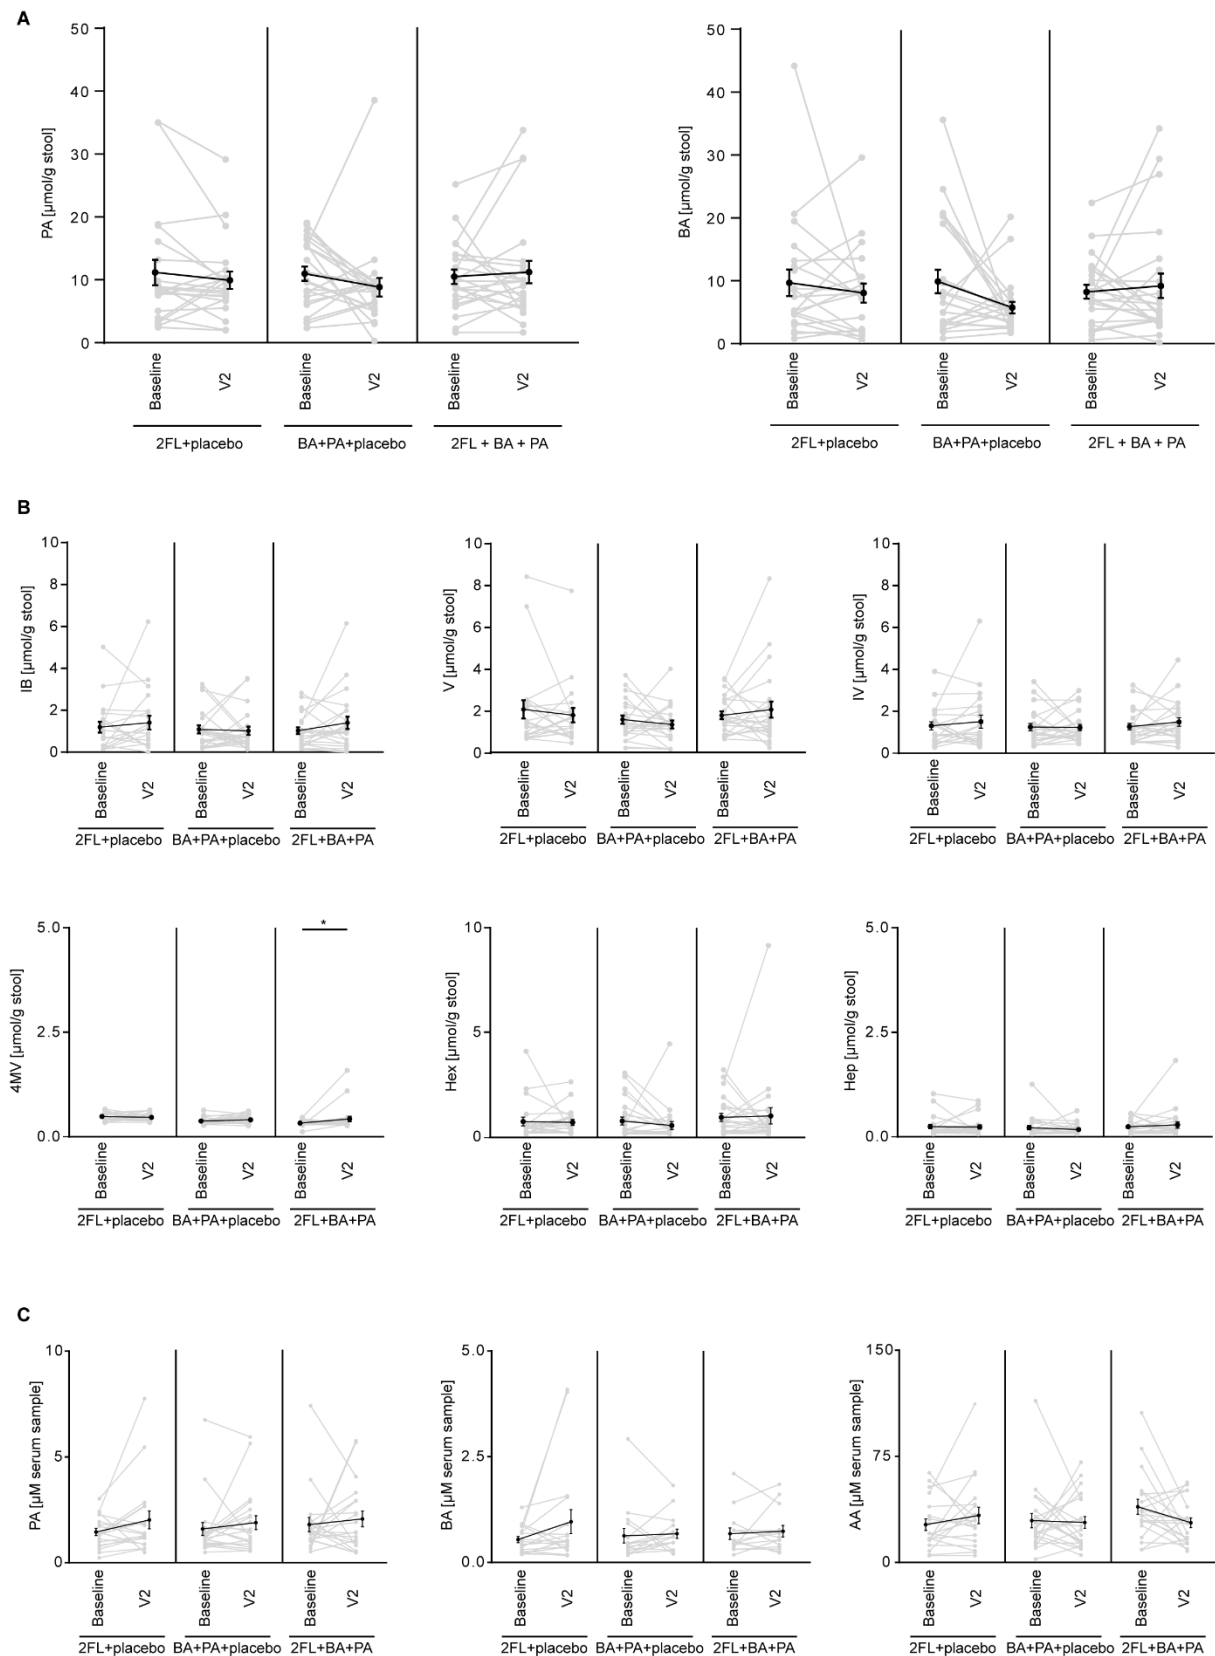

**Supplementary Fig. S2. SCFA concentration in stool and serum is not altered after supplementation. (A) Concentrations of PA and BA and (B) various other SCFAs in stool**

samples. IB = isobutyrate, V = valerate, IV = isovalerate, 4MV = 4-methyl-valerate, Hex = hexanoate, Hep = heptanoate. (C) PA, BA and acetic acid (AA) levels in serum samples. Concentrations measured by HPLC-MS/MS. Data are plotted as before-after for each patient (gray) and mean (black) +/- SEM. Tested by 2-way ANOVA with Sidak's multiple comparisons test; \* $p < 0.05$ .

**gating strategy panel 1**

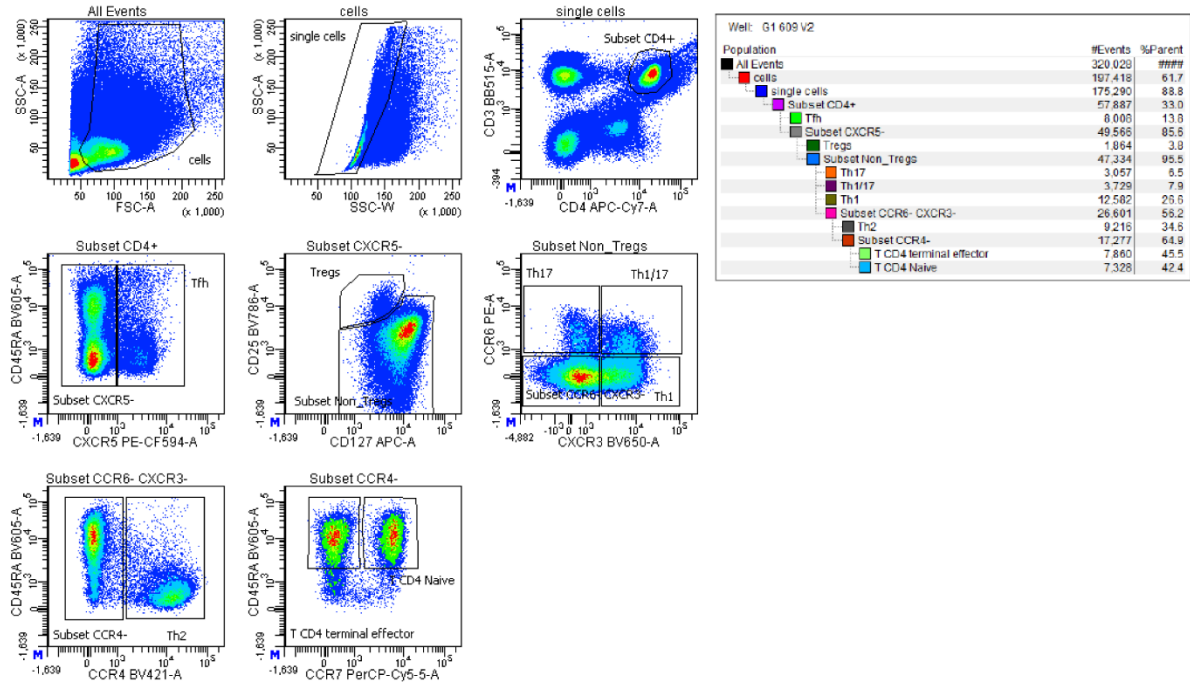

**gating strategy panel 2**

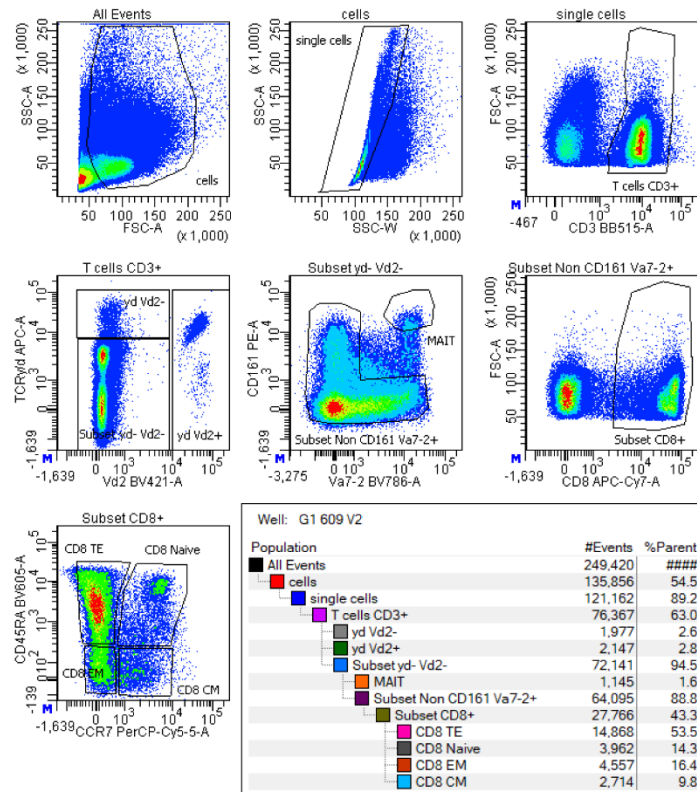

**Supplementary Fig. S3: Gating strategy for flow cytometry analysis of cryopreserved PBMCs. Gating hierarchy for panel 1 (CD4 T cells). Samples passed quality control:**

2FL+placebo: n = 14, BA+PA+placebo: n = 15, 2FL+BA+PA: n = 17; matched baseline and V2 samples. Gating hierarchy for panel 2 (conventional CD8 T cells,  $\gamma\delta$ TCR+ and MAIT cells). Samples passed quality control: 2FL+placebo: n = 11, BA+PA+placebo: n = 12, 2FL+BA+PA: n = 17; matched baseline and V2 samples. All phenotyping experiments were performed on a BD FACS Celesta<sup>TM</sup> and analyzed by BD FACS DIVA v9 software.

gating strategy panel 3

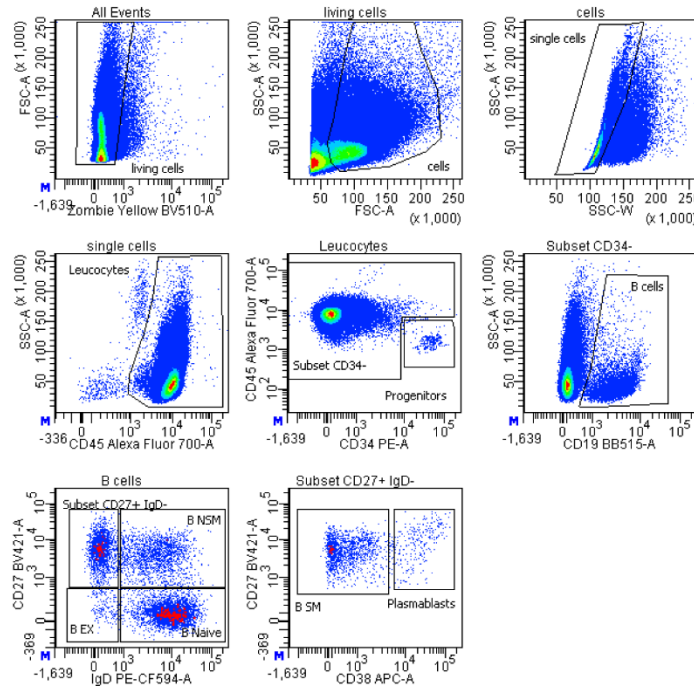

Well: G1 609 V2

| Population        | #Events | %Parent |
|-------------------|---------|---------|
| All Events        | 320,749 | ####    |
| living cells      | 316,996 | 98.8    |
| cells             | 159,258 | 50.2    |
| single cells      | 141,278 | 88.7    |
| Leucocytes        | 140,605 | 99.5    |
| Progenitors       | 245     | 0.2     |
| Subset CD34-      | 140,329 | 99.8    |
| B cells           | 6,909   | 4.9     |
| B Naive           | 3,158   | 45.7    |
| B NSM             | 1,725   | 25.0    |
| B EX              | 168     | 2.4     |
| Subset CD27+ IgD- | 1,807   | 26.2    |
| B SM              | 1,537   | 85.1    |
| Plasmablasts      | 248     | 13.7    |

gating strategy panel 4

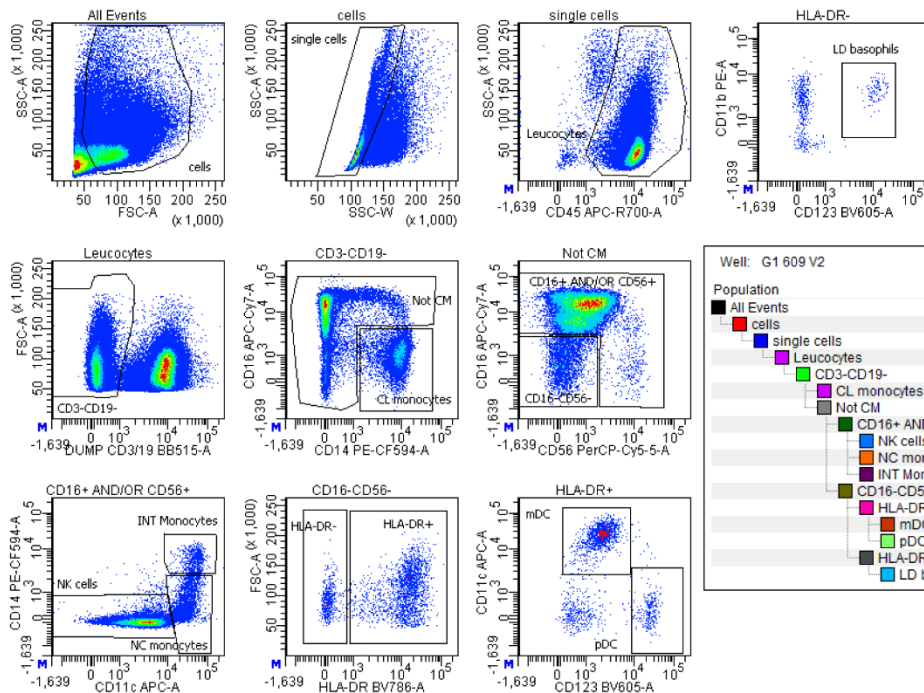

Well: G1 609 V2

| Population         | #Events | %Parent |
|--------------------|---------|---------|
| All Events         | 219,954 | ####    |
| cells              | 117,310 | 53.3    |
| single cells       | 103,651 | 88.4    |
| Leucocytes         | 102,384 | 98.8    |
| CD3-CD19-          | 31,469  | 30.7    |
| CL monocytes       | 6,270   | 19.9    |
| Not CM             | 25,080  | 79.7    |
| CD16+ AND/OR CD56- | 22,285  | 88.9    |
| NK cells           | 18,917  | 84.9    |
| NC monocytes       | 2,486   | 11.2    |
| INT Monocytes      | 711     | 3.2     |
| CD16-CD56-         | 2,595   | 10.3    |
| HLA-DR+            | 1,998   | 77.0    |
| mDC                | 1,338   | 67.0    |
| pDC                | 272     | 13.6    |
| HLA-DR-            | 583     | 22.5    |
| LD basophils       | 107     | 18.4    |

**Supplementary Fig. S4: Gating strategy for flow cytometry analysis of cryopreserved PBMCs.** Gating hierarchy for panel 3 (B cells and myeloid progenitors). Samples passed quality control: 2FL+placebo: n = 14, BA+PA+placebo: n = 15, 2FL+BA+PA: n = 17, matched baseline and V2 samples. Gating hierarchy for panel 4 (monocytes, dendritic cells, low density basophils and NK cells). Samples passed quality control: 2FL+placebo: n = 9, BA+PA+placebo: n = 10, 2FL+BA+PA: n = 13; matched baseline and V2 samples. All phenotyping experiments were performed on a BD FACS Celesta<sup>TM</sup> and analyzed by BD FACS DIVA v9 software.

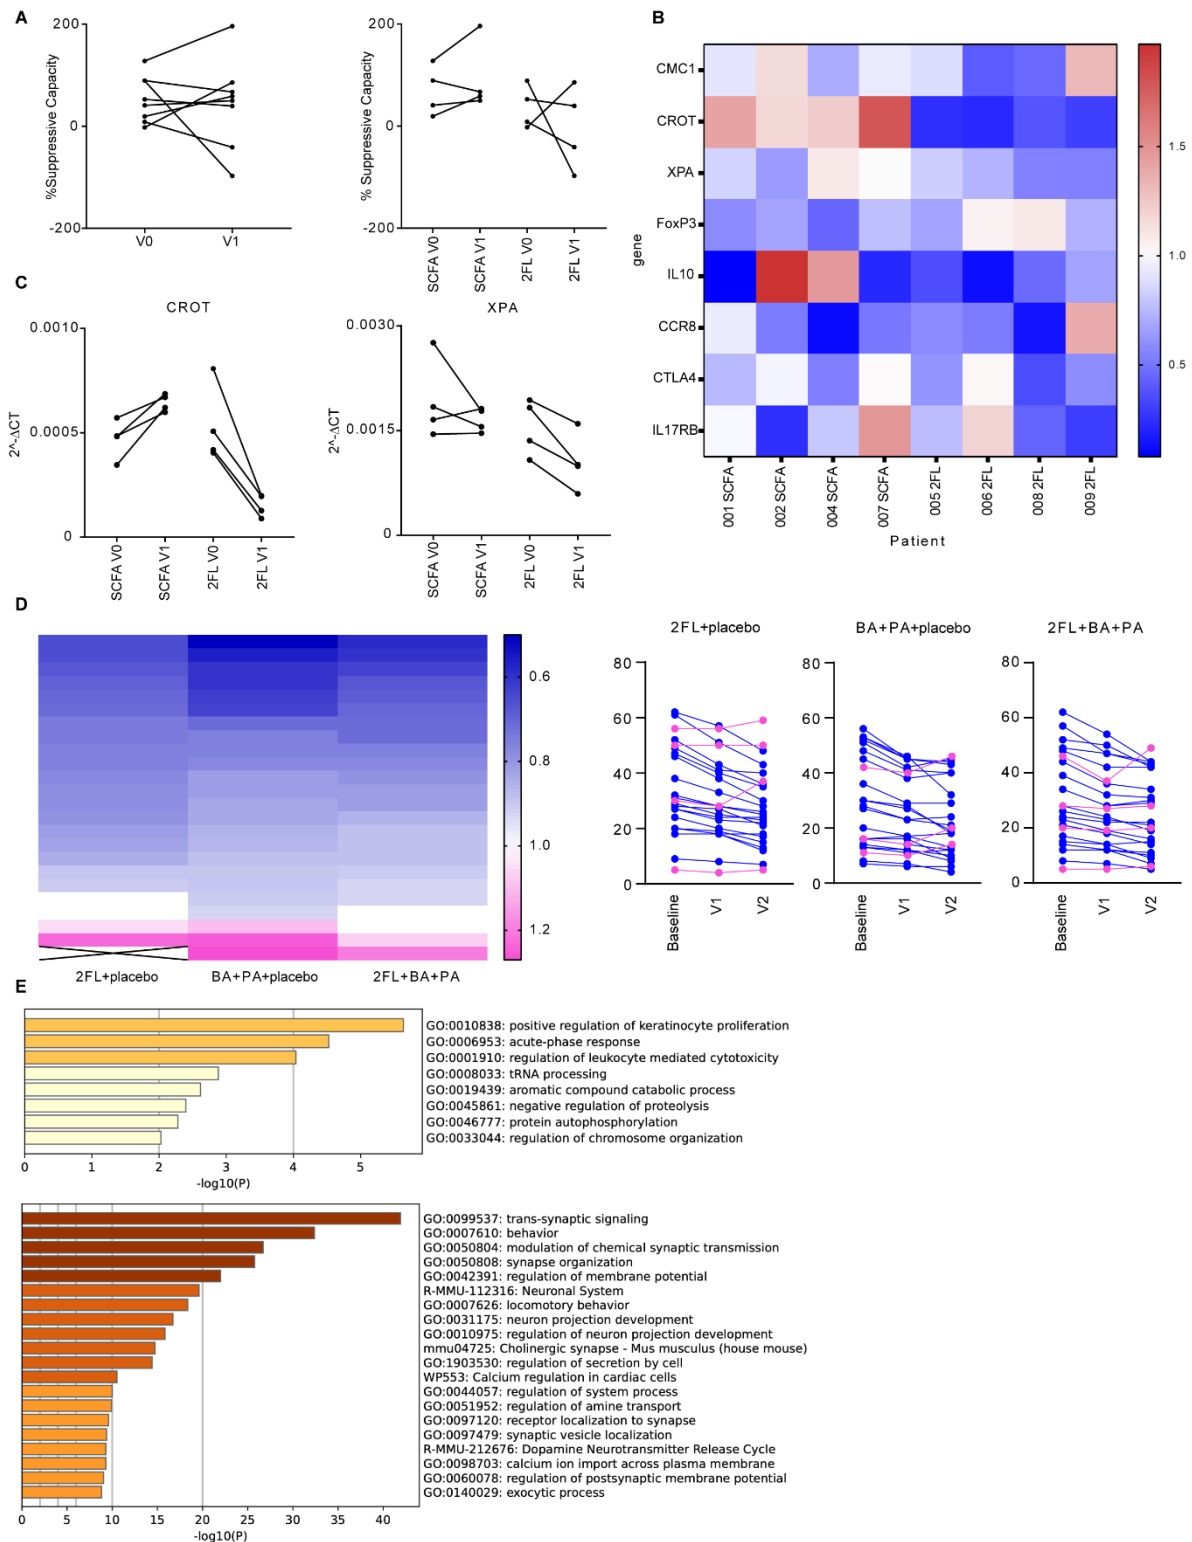

**Supplementary Fig. S5: Supplementation with SCFA does not boost the suppressive capacity of Tregs but increases the expression of mitochondrial genes and clinical response to supplementation is associated with distinct *ex vivo* colonic responses. (A)** Treg/PBMC suppression assay at baseline (V0) and 14-day follow-up (V1), samples from



validation cohort PrePD2, MACS-sorted cells. **(B, C)** Gene expression in sorted Tregs from validation cohort PrePD2. FACS-sorted cells. **(B)** Heatmap of fold changes follow-up (V1) and **(C)** individual  $2^{-\Delta CT}$  values for *Crot* and *Xpa*. Housekeeping *B2m*, time points compared by Wilcoxon matched pairs test. **(D)** Responders (R: MDS-UPDRS III V2 < MDS-UPDRS III baseline) and nonresponders (NR: MDS-UPDRS III V2  $\geq$  MDS-UPDRS III baseline) stratified by group. Data plotted as heatmap (ratio V2/baseline) and MDS-UPDRS III before-after for each patient; responders (blue) and nonresponders (pink). **(E)** Gene Ontology analysis of transcripts enriched in gut cultures infused with R vs. NR microbiota using Metascape. Upper panel, pathways upregulated by R microbiota; lower panel, pathways induced by NR microbiota.

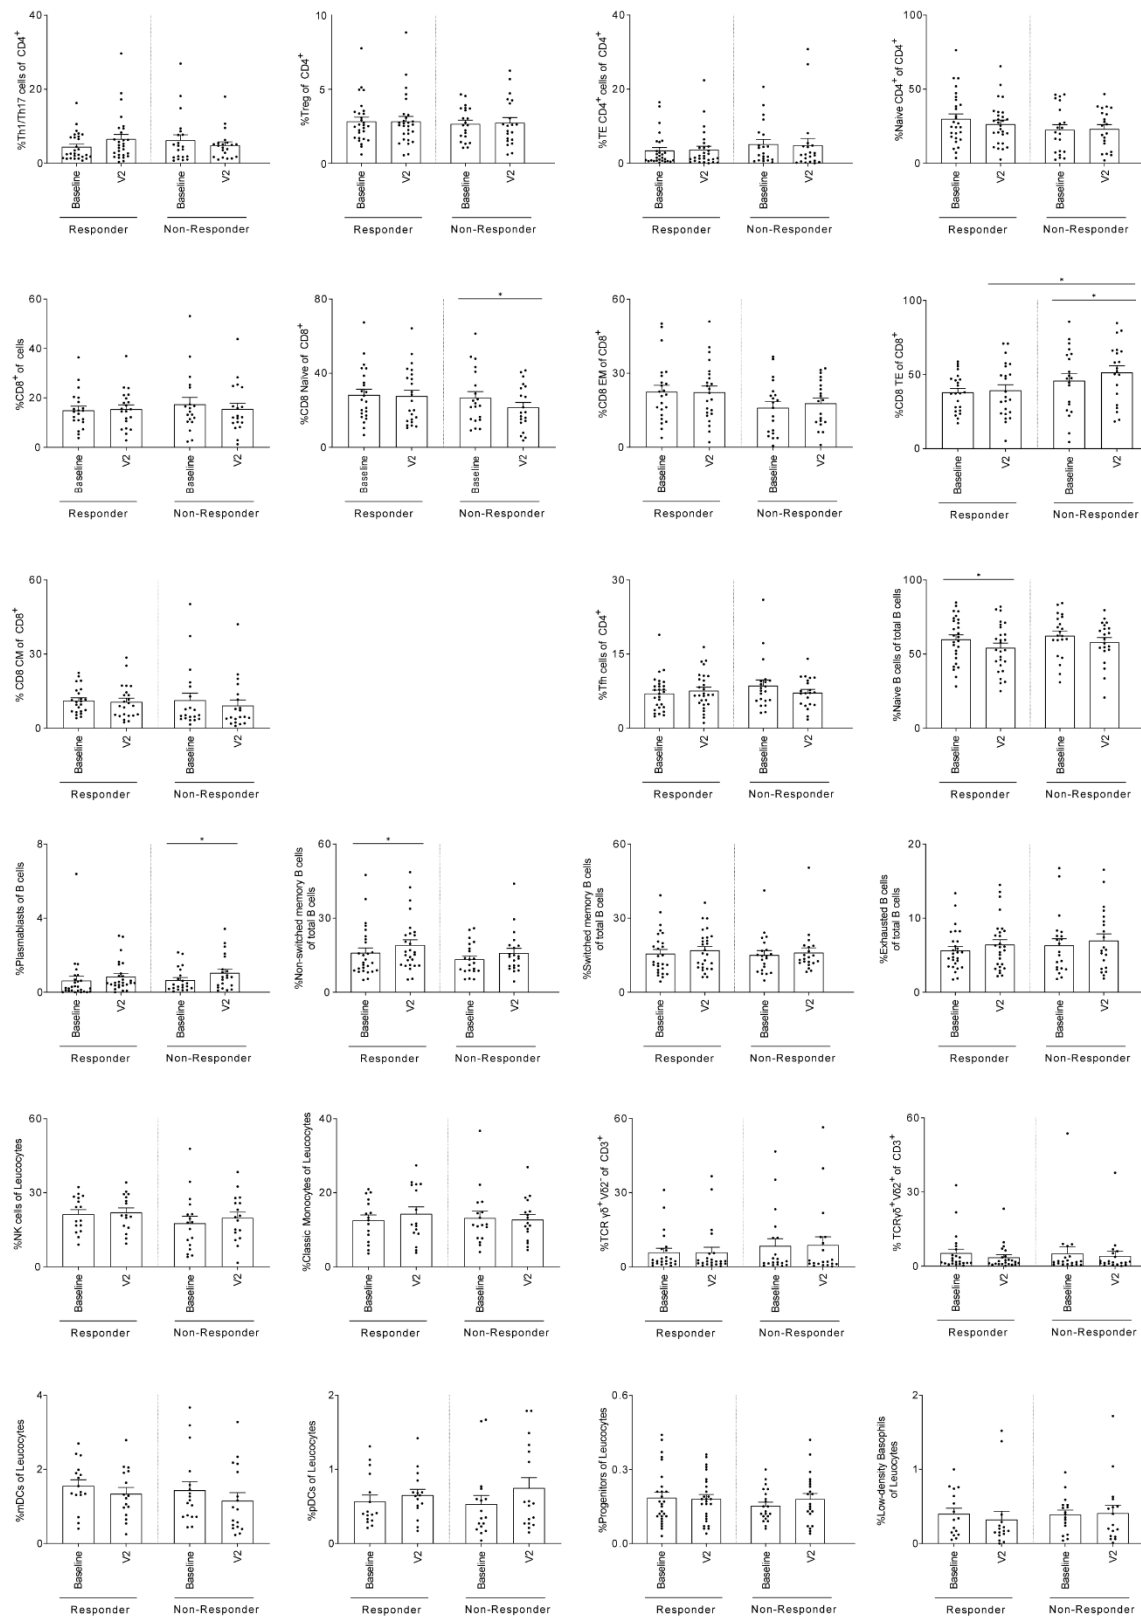

**Supplementary Fig. S6: Supplementation with SCFAs and/or 2FL induces distinct changes in immune cell subsets in responding patients.** In-depth immune profiling of frozen PBMCs at baseline and after 6 months of supplementation (V2). Proportions of

immune subsets; for gating strategies and antibodies, see Supplementary Figs. 3 and 4, Supplementary Tables and immunophenotyping in Methods section. All data are depicted as the mean  $\pm$  SEM, median split responder/nonresponder according to MDS-UPDRS III. Paired T tests were performed for before-after comparisons, and unpaired T tests were performed for baseline and V2 R versus NR comparisons. \* $p < 0.05$ .

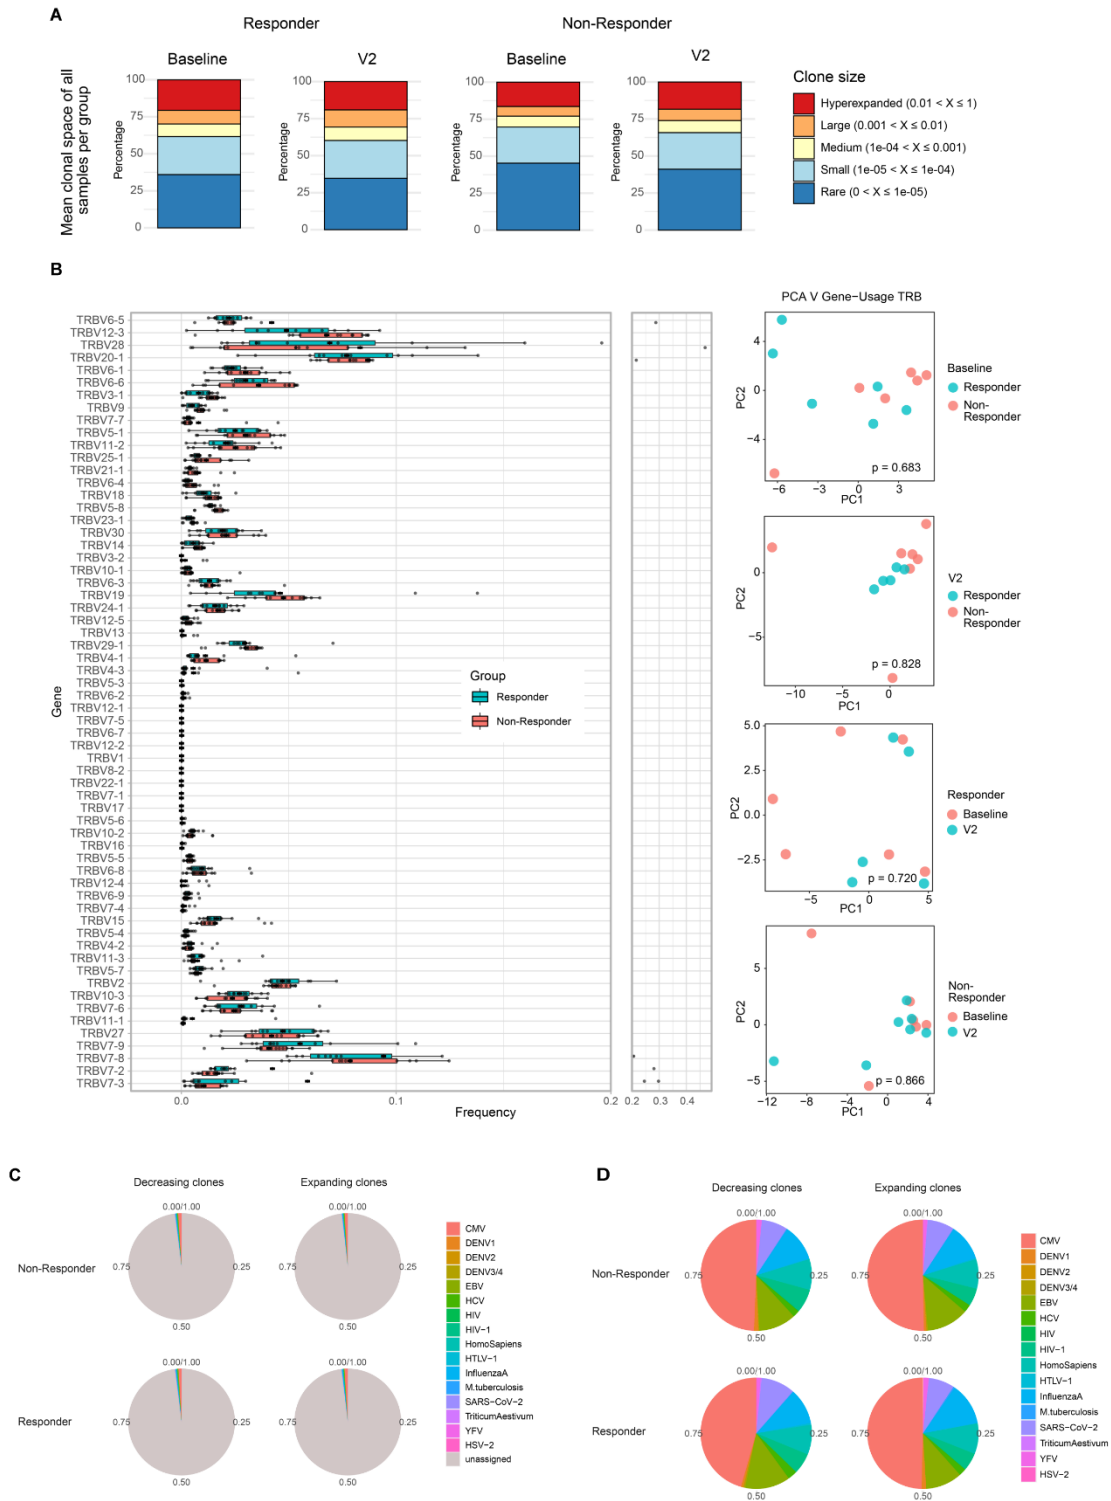

**Supplementary Fig. S7: Extended analysis of TCRbeta repertoire characteristics and epitope recognition of TCRbeta clones. (A)** Clonal space distribution for all samples per group. Percentage of repertoire taken up by hyperexpanded clones (frequency > 0.01) to rare clones (frequency < 0.00001) plotted as the mean per group. **(B)** TRBV gene usage within

repertoires of responders versus nonresponders (pooled baseline and V2). Each point refers to one repertoire. Boxes extend from 25% to 75% quartile with whiskers spanning 1.5\* interquartile range; the bold line indicates the mean. Principal component analyses (PCA) of TRBV usage shown for the first and second dimension of each comparison. Small distances between points refer to similar TRBV gene usage, while long distances between samples reflect more different TRBV gene usage. P values were calculated with multivariate analysis of variance (MANOVA) according to Pillai. **(C, D)** Clones with decreased or expanded frequencies in responders or nonresponders (paired samples) upon supplementation were identified using the public database VDJdb30 (accessed 2nd August 2022) for matching CDR3 amino acids. Epitopes of TCRbeta with known function plotted per group including (C) or excluding (D) unassigned sequences.
