# Supplementary material for: Supplementation with short-chain fatty acids and a prebiotic improves clinical outcome in Parkinson’s disease: a randomized double-blind prospective study
Source: Springer Nature journal article supplement (doi:10.1038/s41598-025-29692-x), 2025-12-05
Supplement: MOESM8 [file 41598_2025_29692_MOESM8_ESM.pdf › 41598_2025_29692_MOESM8_ESM.pdf]

| Surface Marker      | Clone  | Fluorochrome    | Company   | Cat-Nr.     | Panel   |
|---------------------|--------|-----------------|-----------|-------------|---------|
| CD3                 | UCHT1  | FITC            | BioLegend | 300440      | 1, 2, 4 |
| CD4                 | RPAT4  | APC Fire 750    | BioLegend | 300560      | 1       |
| CD25                | M-A251 | BV785           | BioLegend | 356140      | 1       |
| CD127               | A019D5 | APC             | BioLegend | 351316      | 1       |
| CXCR5               | J25204 | PE/Dazzle 594   | BioLegend | 356928      | 1       |
| CD45RA              | H100   | BV605           | BioLegend | 304134      | 1,2     |
| CCR7                | G043H7 | PerCP/Cy5.5     | BioLegend | 353220      | 1,2     |
| CCR6                | 11A9   | PE              | BD        | 559562      | 1       |
| CXCR3               | G025H7 | BV650           | BioLegend | 353730      | 1       |
| CCR4                | L2A1H4 | BV421           | BioLegend | 359414      | 1       |
| CD8                 | SK1    | APC Fire 750    | BioLegend | 344746      | 2       |
| CD161               | HP3G10 | PE              | BioLegend | 339904      | 2       |
| V87.2               | 3C10   | BV785           | BioLegend | 351722      | 2       |
| TCR $\gamma/\delta$ | 11F2   | APC             | Miltenyi  | 130-113-500 | 2       |
| V82                 | B6     | BV421           | BioLegend | 331428      | 2       |
| CD19                | H1B19  | FITC            | BioLegend | 302206      | 3, 4    |
| IgD                 | 1A6-2  | PE/Dazzle 594   | BioLegend | 348240      | 3       |
| CD45                | H130   | Alexa Fluor 700 | BioLegend | 304024      | 3, 4    |
| CD27                | 323    | BV421           | BioLegend | 302824      | 3       |
| CD38                | HIT2   | APC             | BioLegend | 303510      | 3       |
| CD34                | 563    | PE              | BD        | 550761      | 3       |
| CD11c               | B-LY6  | APC             | BD        | 559877      | 4       |
| CD14                | HCD14  | PE/Dazzle 594   | BioLegend | 325634      | 4       |
| CD16                | 3G8    | APC Fire 750    | BioLegend | 302060      | 4       |
| CD56                | HCD56  | PerCP/Cy5.5     | BioLegend | 318322      | 4       |
| CD11b               | ICRF44 | PE              | BioLegend | 301306      | 4       |
| CD123               | 6H6    | BV605           | BioLegend | 306026      | 4       |
| HLA-DR              | L243   | BV785           | BioLegend | 307642      | 4       |

**Supplementary Table S1:** List of antibodies used for in-depth immunophenotyping.

| Panel 1 - CD4 T cells               |                                      |                                                                                                                                                             |                                             |
|-------------------------------------|--------------------------------------|-------------------------------------------------------------------------------------------------------------------------------------------------------------|---------------------------------------------|
| Cell type                           | Gating strategy                      |                                                                                                                                                             |                                             |
| CD4+ T cells                        | CD3 <sup>+</sup><br>CD4 <sup>+</sup> | CXCR5 <sup>+</sup>                                                                                                                                          |                                             |
| T follicular helper (Tfh)           |                                      | CXCR5 <sup>-</sup> CD25 <sup>high</sup> CD127 <sup>low</sup>                                                                                                |                                             |
| T regulatory cells (Tregs)          |                                      | CXCR5 <sup>-</sup> CD127 <sup>+</sup> CD25 <sup>-/low</sup> CXCR3 <sup>+</sup> CCR6 <sup>-</sup>                                                            |                                             |
| T helper 1 (Th1)                    |                                      | CXCR5 <sup>-</sup> CD127 <sup>+</sup> CD25 <sup>-/low</sup> CXCR3 <sup>+</sup> CCR6 <sup>+</sup>                                                            |                                             |
| T helper 1/T helper 17 (Th1/Th17)   |                                      | CXCR5 <sup>-</sup> CD127 <sup>+</sup> CD25 <sup>-/low</sup> CXCR3 <sup>-</sup> CCR6 <sup>-</sup> CCR4 <sup>+</sup>                                          |                                             |
| T helper 17 (Th17)                  |                                      | CXCR5 <sup>-</sup> CD127 <sup>+</sup> CD25 <sup>-/low</sup> CXCR3 <sup>-</sup> CCR6 <sup>-</sup> CCR4 <sup>-</sup>                                          |                                             |
| T helper 2 (Th2)                    |                                      | CXCR5 <sup>-</sup> CD127 <sup>+</sup> CD25 <sup>-/low</sup> CXCR3 <sup>-</sup> CCR6 <sup>-</sup> CCR4 <sup>-</sup>                                          |                                             |
| T CD4 terminal effector (T CD4 TE)  |                                      | CCR7 <sup>-</sup> CD45RA <sup>low</sup>                                                                                                                     |                                             |
| T CD4 Naïve                         |                                      | CXCR5 <sup>-</sup> CD127 <sup>+</sup> CD25 <sup>-/low</sup> CXCR3 <sup>-</sup> CCR6 <sup>-</sup> CCR4 <sup>-</sup> CCR7 <sup>+</sup> CD45RA <sup>high</sup> |                                             |
| Panel 2 - CD8, γ/δ and MAIT T cells |                                      |                                                                                                                                                             |                                             |
| Cell type                           | Gating strategy                      |                                                                                                                                                             |                                             |
| CD8+ T cells                        | CD3 <sup>+</sup>                     | TCR γ/δ <sup>-</sup>                                                                                                                                        | CD16 <sup>high</sup> NOT Vα7.2 <sup>+</sup> |
| γ/δ Vd2 <sup>+</sup> (T gd Vd2+)    |                                      | TCR γ/δ <sup>+</sup>                                                                                                                                        | Vd2 <sup>+</sup>                            |
| γ/δ Vd2 <sup>-</sup> (T gd non-Vd2) |                                      |                                                                                                                                                             | Vd2 <sup>-</sup>                            |
| MAIT                                |                                      | TCR γ/δ <sup>-</sup> Vd2 <sup>-</sup>                                                                                                                       | Vα7.2 <sup>+</sup> CD161 <sup>high</sup>    |
| T CD8 Naïve                         |                                      | CD8 <sup>+</sup> TCR γ/δ <sup>-</sup> Vd2 <sup>-</sup>                                                                                                      | CCR7 <sup>+</sup> CD45RA <sup>+</sup>       |
| T CD8 central memory (CM)           |                                      |                                                                                                                                                             | CCR7 <sup>+</sup> CD45RA <sup>-</sup>       |
| T CD8 effector memory (EM)          |                                      |                                                                                                                                                             | CCR7 <sup>-</sup> CD45RA <sup>-</sup>       |
| T CD8 terminal effector (TE)        |                                      |                                                                                                                                                             | CCR7 <sup>-</sup> CD45RA <sup>+</sup>       |
| PANEL 3 - B cells and Progenitors   |                                      |                                                                                                                                                             |                                             |
| Cell type                           | Gating strategy                      |                                                                                                                                                             |                                             |
| Progenitors                         | CD45 <sup>+</sup>                    | CD34 <sup>+</sup> CD45 <sup>low</sup>                                                                                                                       |                                             |
| Total B cells (B cells)             |                                      | CD19 <sup>+</sup> CD34 <sup>-</sup>                                                                                                                         | CD27 <sup>-</sup> IgD <sup>+</sup>          |
| Naïve B cells (B naïve)             |                                      |                                                                                                                                                             | CD27 <sup>+</sup> IgD <sup>+</sup>          |
| Nonswitched memory B cells (B NSM)  |                                      |                                                                                                                                                             |                                             |
| Exhausted B cells (B EX)            |                                      |                                                                                                                                                             | CD27 <sup>-</sup> IgD <sup>-</sup>          |

| Switched memory B cells (B SM)                                   |                                                            |                                     | CD27 <sup>+</sup> IgD <sup>-</sup> CD38 <sup>low</sup>                         |
|------------------------------------------------------------------|------------------------------------------------------------|-------------------------------------|--------------------------------------------------------------------------------|
| Plasmablasts                                                     |                                                            |                                     | CD27 <sup>+</sup> IgD <sup>-</sup> CD38 <sup>high</sup>                        |
| <b>Panel 4 - Monocytes, DCs, NK cells, Low-density basophils</b> |                                                            |                                     |                                                                                |
| Cell type                                                        | Gating strategy                                            |                                     |                                                                                |
| NK cells                                                         | CD45 <sup>+</sup><br>CD3 <sup>-</sup><br>CD19 <sup>-</sup> |                                     | CD16 <sup>+/-</sup> CD56 <sup>+/low</sup> CD14 <sup>-</sup> CD11c <sup>-</sup> |
| Classic monocytes (C)                                            |                                                            |                                     | CD14 <sup>+</sup> CD16 <sup>-</sup>                                            |
| Intermediate monocytes (I)                                       |                                                            | CD11c <sup>+</sup>                  | CD14 <sup>+</sup> CD16 <sup>+</sup>                                            |
| Nonclassic monocytes (NC)                                        |                                                            |                                     | CD14 <sup>low</sup> CD16 <sup>+</sup>                                          |
| Myeloid dendritic cells (mDCs)                                   |                                                            | CD16 <sup>-</sup> CD56 <sup>-</sup> | HLA-DR <sup>+</sup> CD11c <sup>+</sup> CD123 <sup>low</sup>                    |
| Plasmacytoid dendritic cells (pDCs)                              |                                                            |                                     | HLA-DR <sup>+</sup> CD11c <sup>-</sup> CD123 <sup>+</sup>                      |
| Low-density basophils (LD)                                       |                                                            |                                     | HLA-DR <sup>-</sup> CD123 <sup>+</sup> CD11b <sup>+</sup>                      |

**Supplementary Table S2:** Gating strategies for in-depth immuno-phenotyping of immune cell subsets.

| Characteristics            | PA+BA+placebo<br>(n=24) | 2FL+placebo<br>(n=24) | 2FL+PA+BA<br>(n=24) |
|----------------------------|-------------------------|-----------------------|---------------------|
| Female sex                 | 13 (54.2%)              | 9 (37.5%)             | 13 (54.2%)          |
| Age, years                 | 62(±9)                  | 67 (±12)              | 65 (±8)             |
| Duration of disease, years | 7 (±7)                  | 6 (±6)                | 4 (±4)              |
| BMI                        | 26 (±4)                 | 26 (±3)               | 25 (±3)             |
| Subgroups                  |                         |                       |                     |
| akinetetic-rigid           | 8 (33.3%)               | 9 (37.5%)             | 11 (45.8%)          |
| equivalent                 | 14 (58.3%)              | 12 (50%)              | 12 (50%)            |
| tremordominant             | 2 (8.3 %)               | 3 (12.5%)             | 1 (4.17%)           |
| Medication                 |                         |                       |                     |
| LEDD [mg]                  | 770 (±302)              | 785 (±267)            | 756 (±261)          |
| 95% CI                     | 642.1-897.1             | 672.2-897.3           | 646-866.5           |
| Benserazide                | 24 (100%)               | 22 (91.7%)            | 23 (95.8%)          |
| Carbidopa                  | 4 (16.7%)               | 5 (20.8%)             | 2 (8.3%)            |
| Piribedil                  | 2 (8.3%)                | 0                     | 2 (8.3%)            |
| Rotigotine                 | 2 (8.3%)                | 3 (12.5%)             | 3 (12.5%)           |
| Ropinirole                 | 2 (8.3%)                | 1 (4.17%)             | 2 (8.3%)            |
| Pramipexole                | 4 (16.7%)               | 2 (8.3%)              | 4 (16.7%)           |
| Rasagiline                 | 13 (54.2%)              | 8 (33.3%)             | 14 (58.3%)          |
| Selegiline                 | 3 (12.5%)               | 9 (37.5%)             | 3 (12.5%)           |
| Safinamide                 | 2 (8.3%)                | 1 (4.2%)              | 2 (8.3%)            |
| COMT-inhibitor             | 6 (25%)                 | 8 (33.3%)             | 9 (37.5%)           |
| Amantadine                 | 2 (8.3 %)               | 2 (8.3 %)             | 1 (4.2%)            |
| Apomorphine                | 0                       | 0                     | 0                   |
| Anticholinergics           | 0                       | 1 (4.2%)              | 0                   |
| Clozapine                  | 1 (4.2%)                | 0                     | 2 (8.3%)            |
| Quetiapine                 | 1 (4.2%)                | 3 (12.5%)             | 1 (4.2%)            |
| PD Clinical Scores         |                         |                       |                     |
| MDS-UPDRS I                | 10 (±10)                | 17 (±12)              | 17 (±13)            |
| 95% CI                     | 12.6-21                 | 12.1-22.5             | 11.2-22.1           |
| MDS-UPDRS II               | 9 (±6)                  | 9 (±8)                | 10 (±9)             |

|                    |                 |                 |                 |
|--------------------|-----------------|-----------------|-----------------|
| 95% CI             | 6.8-12.1        | 6.3-12.7        | 6-13.4          |
| MDS-UPDRS III      | 29 ( $\pm 17$ ) | 33 ( $\pm 16$ ) | 30 ( $\pm 16$ ) |
| 95% CI             | 22.1-36.3       | 26.3-40         | 23-36.8         |
| MDS-UPDRS IV       | 3 ( $\pm 3$ )   | 5 ( $\pm 5$ )   | 3 ( $\pm 3$ )   |
| 95% CI             | 1.8-4.2         | 2.5-6.3         | 1.4-4.1         |
| Hoehn & Yahr scale | 2 ( $\pm 1$ )   | 2 ( $\pm 1$ )   | 2 ( $\pm 1$ )   |
| 95% CI             | 1.9-2.5         | 1.9-2.4         | 1.9-2.7         |
| PANDA              | 25 ( $\pm 4$ )  | 33 ( $\pm 16$ ) | 30 ( $\pm 16$ ) |
| 95% CI             | 23.7-26.7       | 18.9-24.8       | 20.8-26.1       |
| Olfactory score    | 8 ( $\pm 3$ )   | 7 ( $\pm 3$ )   | 7 ( $\pm 3$ )   |
| 95% CI             | 6.8-9           | 5.9-8.1         | 5.6-8.1         |

**Supplementary Table 3. Demographic data and characteristics of patients prior to therapeutic intervention.** Main demographics and clinical and treatment characteristics of participants at study entry. Data are presented as the mean  $\pm$  SD or n (%).

| <b>Adverse Event (AE)</b>                        | <b>Therapeutic Intervention</b> | <b>CTCAE Grade 1 (Mild)</b> | <b>CTCAE Grade 2 (Moderate)</b> | <b>CTCAE Grade 3 (Severe)</b> | <b>CTCAE Grade 4 (Life-threatening)</b> |
|--------------------------------------------------|---------------------------------|-----------------------------|---------------------------------|-------------------------------|-----------------------------------------|
| <b>Flatulence / Bloating</b>                     | PA+BA                           | 3/24                        | —                               | —                             | —                                       |
|                                                  | 2FL                             | 5/23                        | —                               | —                             | —                                       |
|                                                  | PA+BA+2FL                       | 4/24                        | —                               | —                             | —                                       |
| <b>Diarrhea</b>                                  | PA+BA                           | 2/24                        | —                               | —                             | —                                       |
|                                                  | 2FL                             | 2/23                        | —                               | —                             | —                                       |
|                                                  | PA+BA+2FL                       | 4/24                        | —                               | —                             | —                                       |
| <b>Abdominal pain / cramps</b>                   | PA+BA                           | 0/24                        | —                               | —                             | —                                       |
|                                                  | 2FL                             | 1/23                        | —                               | —                             | —                                       |
|                                                  | PA+BA+2FL                       | 0/24                        | —                               | —                             | —                                       |
| <b>Nausea</b>                                    | PA+BA                           | 1/24                        | —                               | —                             | —                                       |
|                                                  | 2FL                             | 2/23                        | —                               | —                             | —                                       |
|                                                  | PA+BA+2FL                       | 0/24                        | —                               | —                             | —                                       |
| <b>Headache</b>                                  | PA+BA                           | —                           | —                               | —                             | —                                       |
|                                                  | 2FL                             | —                           | —                               | —                             | —                                       |
|                                                  | PA+BA+2FL                       | —                           | —                               | —                             | —                                       |
| <b>Systemic reactions (allergy, intolerance)</b> | PA+BA                           | —                           | —                               | —                             | —                                       |
|                                                  | 2FL                             | —                           | —                               | —                             | —                                       |
|                                                  | PA+BA+2FL                       | —                           | —                               | —                             | —                                       |

**Supplementary Table 4. Adverse Effects and Severity Grading:** Frequency and severity of adverse events (AEs) observed during the 6-month intervention study. Severity was assessed according to the Common Terminology Criteria for Adverse Events (CTCAE, Version 5.0), with Grade 1 indicating mild symptoms requiring no intervention, Grade 2 indicating moderate symptoms requiring medical intervention, Grade 3 indicating severe symptoms requiring hospitalization or therapy, and Grade 4 indicating life-threatening events. The numbers in the columns represent the number of participants per group who experienced each event at the specified severity, out of a total of 24 (23 for the 2FL group) participants per group.

| <b>Dietary change in the last 6 months</b> | <b>Baseline</b> | <b>Visit 1 (3 months)</b> | <b>Visit 2 (6 months)</b> |
|--------------------------------------------|-----------------|---------------------------|---------------------------|
| <b>PA+BA+placebo</b>                       | 0/24            | 0/24                      | 0/24                      |
| <b>2FL+placebo</b>                         | 0/24            | 1/23                      | 1/23                      |
| <b>2FL+PA+BA</b>                           | 0/24            | 2/24                      | 2/24                      |

**Supplementary Table S5. Dietary change in the last 6 months:** This table indicates the number of participants who reported changes in their diet during the last 6 months. Dietary intake was assessed at baseline (month 0), after 3 months (V1, visit 1), and after 6 months (V2, visit 2) using a standardized dietary questionnaire. Values represent the number of participants per intervention group reporting dietary changes and the total number of participants in each group (n = 24).
