# Supplementary material for: Supplementation with short-chain fatty acids and a prebiotic improves clinical outcome in Parkinson’s disease: a randomized double-blind prospective study
Source: Sci Rep. 2025 Dec 5;16:315. doi: 10.1038/s41598-025-29692-x (PMC12770440; doi:10.1038/s41598-025-29692-x)
Supplement: Supplementary file 1 — Supplementary Material 1 [file 41598_2025_29692_MOESM1_ESM.xlsx]

## Sheet: גיליון1
index	d__Bacteria;p__Firmicutes_A;c__Clostridia;o__Oscillospirales;f__Oscillospiraceae;g__CAG-110	d__Bacteria;p__Actinobacteriota;c__Actinobacteria;o__Actinomycetales;f__Bifidobacteriaceae;g__Bifidobacterium;s__Bifidobacterium pseudolongum	d__Bacteria;p__Actinobacteriota;c__Coriobacteriia;o__Coriobacteriales;f__Coriobacteriaceae;g__Collinsella	d__Bacteria;p__Bacteroidota;c__Bacteroidia;o__Bacteroidales;f__Tannerellaceae;g__Parabacteroides;s__Parabacteroides distasonis	d__Bacteria;p__Firmicutes_A;c__Clostridia;o__Clostridiales;f__Clostridiaceae	d__Bacteria;p__Firmicutes_A;c__Clostridia;o__Oscillospirales;f__Acutalibacteraceae	d__Bacteria;p__Firmicutes_A;c__Clostridia;o__Oscillospirales;f__Oscillospiraceae;g__CAG-110;s__CAG-110 sp002437585	Group
461165_600Bp	192	32	527	0	815	2259	192	pre
461165_600V2p	15	0	75	18	87	1173	0	post
461165_602B	217	0	790	0	5190	820	137	pre
461165_602V2	83	0	301	0	189	764	83	post
461165_603B	313	0	470	0	1550	894	191	pre
461165_603V2	107	0	342	15	249	329	107	post
461165_605B	213	18	0	9	0	1521	53	pre
461165_605V2	76	0	0	11	25	443	28	post
461165_608B	111	0	1529	0	396	129	111	pre
461165_608V2	16	0	57	0	232	309	0	post
461165_608Bp	156	34	489	0	1254	1858	156	pre
461165_608Bpv2	88	0	209	0	45	1260	36	post
461165_631B	193	0	885	0	1913	2269	166	pre
461165_631V2	654	0	1003	0	6	1067	342	post
461165_641B	86	32	303	0	2050	214	43	pre
461165_641V2	109	0	172	16	311	142	109	post
461165_659B	259	67	383	9	208	1123	259	pre
461165_659V2	195	0	1267	28	0	1365	151	post
