# Supplementary material for: Supplementation with short-chain fatty acids and a prebiotic improves clinical outcome in Parkinson’s disease: a randomized double-blind prospective study
Source: Sci Rep. 2025 Dec 5;16:315. doi: 10.1038/s41598-025-29692-x (PMC12770440; doi:10.1038/s41598-025-29692-x)
Supplement: Supplementary file 2 — Supplementary Material 2 [file 41598_2025_29692_MOESM2_ESM.xlsx]

## Sheet: corrPD_R_VS_NR_M5 neg
NAME	GS.br..follow.link.to.MSigDB	GS.DETAILS	SIZE	ES	NES	NOM.p.val	FDR.q.val	FWER.p.val	RANK.AT.MAX	LEADING.EDGE
GOCC_CATION_CHANNEL_COMPLEX	GOCC_CATION_CHANNEL_COMPLEX	Details ...	144	-0.732658	-2.86814	0	0	0	1797	tags=58%, list=13%, signal=67%
GOCC_ION_CHANNEL_COMPLEX	GOCC_ION_CHANNEL_COMPLEX	Details ...	176	-0.701537	-2.85322	0	0	0	1797	tags=52%, list=13%, signal=59%
GOCC_SYNAPTIC_MEMBRANE	GOCC_SYNAPTIC_MEMBRANE	Details ...	326	-0.661905	-2.84279	0	0	0	2011	tags=51%, list=15%, signal=59%
GOCC_INTRINSIC_COMPONENT_OF_POSTSYNAPTIC_MEMBRANE	GOCC_INTRINSIC_COMPONENT_OF_POSTSYNAPTIC_MEMBRANE	Details ...	106	-0.748553	-2.83462	0	0	0	2011	tags=63%, list=15%, signal=74%
GOCC_INTRINSIC_COMPONENT_OF_SYNAPTIC_MEMBRANE	GOCC_INTRINSIC_COMPONENT_OF_SYNAPTIC_MEMBRANE	Details ...	149	-0.724937	-2.83101	0	0	0	1932	tags=56%, list=14%, signal=65%
GOCC_POSTSYNAPTIC_MEMBRANE	GOCC_POSTSYNAPTIC_MEMBRANE	Details ...	217	-0.685733	-2.79255	0	0	0	2410	tags=59%, list=18%, signal=71%
GOBP_CELL_CELL_ADHESION_VIA_PLASMA_MEMBRANE_ADHESION_MOLECULES	GOBP_CELL_CELL_ADHESION_VIA_PLASMA_MEMBRANE_ADHESION_MOLECULES	Details ...	155	-0.702255	-2.79175	0	0	0	1802	tags=47%, list=13%, signal=54%
GOMF_GATED_CHANNEL_ACTIVITY	GOMF_GATED_CHANNEL_ACTIVITY	Details ...	190	-0.688805	-2.78105	0	0	0	1764	tags=47%, list=13%, signal=54%
GOCC_PRESYNAPTIC_MEMBRANE	GOCC_PRESYNAPTIC_MEMBRANE	Details ...	144	-0.701347	-2.75191	0	0	0	1872	tags=56%, list=14%, signal=64%
GOMF_CATION_CHANNEL_ACTIVITY	GOMF_CATION_CHANNEL_ACTIVITY	Details ...	201	-0.671182	-2.73722	0	0	0	1892	tags=50%, list=14%, signal=57%
GOBP_HOMOPHILIC_CELL_ADHESION_VIA_PLASMA_MEMBRANE_ADHESION_MOLECULES	GOBP_HOMOPHILIC_CELL_ADHESION_VIA_PLASMA_MEMBRANE_ADHESION_MOLECULES	Details ...	80	-0.756939	-2.7332	0	0	0	1802	tags=56%, list=13%, signal=64%
GOCC_INTRINSIC_COMPONENT_OF_PRESYNAPTIC_MEMBRANE	GOCC_INTRINSIC_COMPONENT_OF_PRESYNAPTIC_MEMBRANE	Details ...	84	-0.746496	-2.73049	0	0	0	1520	tags=56%, list=11%, signal=63%
GOBP_NEUROTRANSMITTER_TRANSPORT	GOBP_NEUROTRANSMITTER_TRANSPORT	Details ...	189	-0.669512	-2.71769	0	0	0	1778	tags=47%, list=13%, signal=53%
GOBP_NEUROTRANSMITTER_SECRETION	GOBP_NEUROTRANSMITTER_SECRETION	Details ...	153	-0.689238	-2.70715	0	0	0	1778	tags=48%, list=13%, signal=55%
GOMF_VOLTAGE_GATED_CATION_CHANNEL_ACTIVITY	GOMF_VOLTAGE_GATED_CATION_CHANNEL_ACTIVITY	Details ...	86	-0.741499	-2.69079	0	0	0	1764	tags=56%, list=13%, signal=64%
GOMF_METAL_ION_TRANSMEMBRANE_TRANSPORTER_ACTIVITY	GOMF_METAL_ION_TRANSMEMBRANE_TRANSPORTER_ACTIVITY	Details ...	272	-0.636093	-2.6887	0	0	0	1892	tags=38%, list=14%, signal=44%
GOBP_VESICLE_MEDIATED_TRANSPORT_IN_SYNAPSE	GOBP_VESICLE_MEDIATED_TRANSPORT_IN_SYNAPSE	Details ...	223	-0.651421	-2.68733	0	0	0	2689	tags=56%, list=20%, signal=68%
GOCC_POSTSYNAPTIC_SPECIALIZATION_MEMBRANE	GOCC_POSTSYNAPTIC_SPECIALIZATION_MEMBRANE	Details ...	85	-0.735845	-2.68453	0	0	0	1806	tags=59%, list=13%, signal=67%
GOCC_GLUTAMATERGIC_SYNAPSE	GOCC_GLUTAMATERGIC_SYNAPSE	Details ...	422	-0.613704	-2.67935	0	0	0	1994	tags=44%, list=15%, signal=50%
GOCC_INTRINSIC_COMPONENT_OF_POSTSYNAPTIC_SPECIALIZATION_MEMBRANE	GOCC_INTRINSIC_COMPONENT_OF_POSTSYNAPTIC_SPECIALIZATION_MEMBRANE	Details ...	66	-0.76723	-2.67795	0	0	0	1932	tags=68%, list=14%, signal=79%
GOBP_REGULATION_OF_TRANS_SYNAPTIC_SIGNALING	GOBP_REGULATION_OF_TRANS_SYNAPTIC_SIGNALING		406	-0.614116	-2.6765	0	0	0	3003	tags=53%, list=22%, signal=67%
GOMF_VOLTAGE_GATED_CHANNEL_ACTIVITY	GOMF_VOLTAGE_GATED_CHANNEL_ACTIVITY		117	-0.706518	-2.67229	0	0	0	1764	tags=50%, list=13%, signal=56%
GOBP_SYNAPSE_ORGANIZATION	GOBP_SYNAPSE_ORGANIZATION		404	-0.60711	-2.66848	0	0	0	2920	tags=52%, list=22%, signal=64%
GOBP_REGULATION_OF_NEUROTRANSMITTER_LEVELS	GOBP_REGULATION_OF_NEUROTRANSMITTER_LEVELS		200	-0.655103	-2.66311	0	0	0	1865	tags=46%, list=14%, signal=53%
GOBP_AXON_DEVELOPMENT	GOBP_AXON_DEVELOPMENT		438	-0.601705	-2.6593	0	0	0	2783	tags=48%, list=21%, signal=59%
GOCC_DISTAL_AXON	GOCC_DISTAL_AXON		301	-0.622152	-2.6379	0	0	0	2688	tags=55%, list=20%, signal=67%
GOCC_PRESYNAPSE	GOCC_PRESYNAPSE		468	-0.595672	-2.62803	0	0	0	2016	tags=43%, list=15%, signal=49%
GOCC_NEURON_PROJECTION_TERMINUS	GOCC_NEURON_PROJECTION_TERMINUS		158	-0.669504	-2.62293	0	0	0	2075	tags=56%, list=15%, signal=65%
GOBP_SYNAPTIC_VESICLE_EXOCYTOSIS	GOBP_SYNAPTIC_VESICLE_EXOCYTOSIS		111	-0.68995	-2.61835	0	0	0	1645	tags=48%, list=12%, signal=54%
GOBP_POTASSIUM_ION_TRANSMEMBRANE_TRANSPORT	GOBP_POTASSIUM_ION_TRANSMEMBRANE_TRANSPORT		139	-0.669643	-2.61553	0	0	0	1975	tags=48%, list=15%, signal=56%
GOCC_POSTSYNAPTIC_DENSITY_MEMBRANE	GOCC_POSTSYNAPTIC_DENSITY_MEMBRANE		67	-0.744023	-2.61365	0	0	0	1932	tags=61%, list=14%, signal=71%
GOBP_POTASSIUM_ION_TRANSPORT	GOBP_POTASSIUM_ION_TRANSPORT		163	-0.651067	-2.59181	0	0	0	2225	tags=47%, list=16%, signal=56%
GOMF_POTASSIUM_ION_TRANSMEMBRANE_TRANSPORTER_ACTIVITY	GOMF_POTASSIUM_ION_TRANSMEMBRANE_TRANSPORTER_ACTIVITY		96	-0.692067	-2.57828	0	0	0	1764	tags=47%, list=13%, signal=53%
GOCC_NEUROMUSCULAR_JUNCTION	GOCC_NEUROMUSCULAR_JUNCTION		90	-0.698777	-2.57134	0	0	0	1964	tags=60%, list=14%, signal=70%
GOBP_SYNAPTIC_TRANSMISSION_GLUTAMATERGIC	GOBP_SYNAPTIC_TRANSMISSION_GLUTAMATERGIC		78	-0.70417	-2.56186	0	0	0	1751	tags=51%, list=13%, signal=59%
GOMF_CALCIUM_ION_TRANSMEMBRANE_TRANSPORTER_ACTIVITY	GOMF_CALCIUM_ION_TRANSMEMBRANE_TRANSPORTER_ACTIVITY		88	-0.702545	-2.54817	0	0	0	1872	tags=45%, list=14%, signal=52%
GOBP_NEURON_PROJECTION_GUIDANCE	GOBP_NEURON_PROJECTION_GUIDANCE		196	-0.628128	-2.54008	0	0	0	3014	tags=52%, list=22%, signal=66%
GOMF_EXTRACELLULAR_MATRIX_STRUCTURAL_CONSTITUENT	GOMF_EXTRACELLULAR_MATRIX_STRUCTURAL_CONSTITUENT		119	-0.656551	-2.53517	0	0	0	2995	tags=57%, list=22%, signal=73%
GOBP_MULTICELLULAR_ORGANISMAL_SIGNALING	GOBP_MULTICELLULAR_ORGANISMAL_SIGNALING		111	-0.669718	-2.53313	0	0	0	2638	tags=55%, list=19%, signal=68%
GOBP_SYNAPSE_ASSEMBLY	GOBP_SYNAPSE_ASSEMBLY		146	-0.642488	-2.52857	0	0	0	2995	tags=58%, list=22%, signal=74%
GOCC_INTRINSIC_COMPONENT_OF_POSTSYNAPTIC_DENSITY_MEMBRANE	GOCC_INTRINSIC_COMPONENT_OF_POSTSYNAPTIC_DENSITY_MEMBRANE		52	-0.762603	-2.52354	0	0	0	1932	tags=67%, list=14%, signal=78%
GOBP_ACTION_POTENTIAL	GOBP_ACTION_POTENTIAL		109	-0.672724	-2.5218	0	0	0	2988	tags=61%, list=22%, signal=77%
GOBP_REGULATION_OF_POSTSYNAPTIC_MEMBRANE_POTENTIAL	GOBP_REGULATION_OF_POSTSYNAPTIC_MEMBRANE_POTENTIAL		83	-0.700667	-2.52111	0	0	0	2104	tags=53%, list=16%, signal=62%
GOMF_POTASSIUM_CHANNEL_ACTIVITY	GOMF_POTASSIUM_CHANNEL_ACTIVITY		73	-0.711595	-2.52027	0	0	0	1892	tags=53%, list=14%, signal=62%
GOCC_MAIN_AXON	GOCC_MAIN_AXON		64	-0.725138	-2.51865	0	0	0	2225	tags=63%, list=16%, signal=74%
GOBP_DENDRITE_MORPHOGENESIS	GOBP_DENDRITE_MORPHOGENESIS		165	-0.630087	-2.51351	0	0	0	2218	tags=45%, list=16%, signal=53%
GOMF_PASSIVE_TRANSMEMBRANE_TRANSPORTER_ACTIVITY	GOMF_PASSIVE_TRANSMEMBRANE_TRANSPORTER_ACTIVITY		277	-0.594849	-2.51217	0	0	0	1892	tags=39%, list=14%, signal=44%
GOCC_PLASMA_MEMBRANE_PROTEIN_COMPLEX	GOCC_PLASMA_MEMBRANE_PROTEIN_COMPLEX		395	-0.574019	-2.50564	0	0	0	2395	tags=40%, list=18%, signal=47%
GOBP_CALCIUM_ION_REGULATED_EXOCYTOSIS	GOBP_CALCIUM_ION_REGULATED_EXOCYTOSIS		60	-0.733854	-2.50064	0	0	0	2285	tags=62%, list=17%, signal=74%
GOBP_CHEMICAL_SYNAPTIC_TRANSMISSION_POSTSYNAPTIC	GOBP_CHEMICAL_SYNAPTIC_TRANSMISSION_POSTSYNAPTIC		78	-0.700912	-2.49234	0	0	0	2977	tags=64%, list=22%, signal=82%
GOCC_EXCITATORY_SYNAPSE	GOCC_EXCITATORY_SYNAPSE		58	-0.731772	-2.49076	0	0	0	2094	tags=60%, list=15%, signal=71%
GOBP_REGULATION_OF_NERVOUS_SYSTEM_PROCESS	GOBP_REGULATION_OF_NERVOUS_SYSTEM_PROCESS		139	-0.63584	-2.49069	0	0	0	2442	tags=49%, list=18%, signal=59%
GOBP_REGULATION_OF_NEUROTRANSMITTER_TRANSPORT	GOBP_REGULATION_OF_NEUROTRANSMITTER_TRANSPORT		110	-0.658918	-2.48617	0	0	0	2702	tags=56%, list=20%, signal=70%
GOBP_DENDRITE_DEVELOPMENT	GOBP_DENDRITE_DEVELOPMENT		273	-0.590637	-2.48036	0	0	0	2245	tags=41%, list=17%, signal=49%
GOCC_CALCIUM_CHANNEL_COMPLEX	GOCC_CALCIUM_CHANNEL_COMPLEX		33	-0.821505	-2.48028	0	0	0	1797	tags=76%, list=13%, signal=87%
GOBP_POSITIVE_REGULATION_OF_SYNAPTIC_TRANSMISSION	GOBP_POSITIVE_REGULATION_OF_SYNAPTIC_TRANSMISSION		150	-0.637205	-2.47897	0	0	0	2988	tags=57%, list=22%, signal=73%
GOCC_POTASSIUM_CHANNEL_COMPLEX	GOCC_POTASSIUM_CHANNEL_COMPLEX		68	-0.696811	-2.46821	0	0	0	2308	tags=59%, list=17%, signal=71%
GOBP_ADULT_BEHAVIOR	GOBP_ADULT_BEHAVIOR		140	-0.631087	-2.45976	0	0	0	1795	tags=44%, list=13%, signal=50%
GOBP_REGULATION_OF_MEMBRANE_POTENTIAL	GOBP_REGULATION_OF_MEMBRANE_POTENTIAL		329	-0.574778	-2.45552	0	0	0	2741	tags=47%, list=20%, signal=57%
GOBP_CELL_JUNCTION_ASSEMBLY	GOBP_CELL_JUNCTION_ASSEMBLY		342	-0.568846	-2.44535	0	0	0	2624	tags=41%, list=19%, signal=50%
GOCC_NEURON_SPINE	GOCC_NEURON_SPINE		168	-0.612487	-2.43785	0	0	0	2692	tags=53%, list=20%, signal=65%
GOMF_POSTSYNAPTIC_NEUROTRANSMITTER_RECEPTOR_ACTIVITY	GOMF_POSTSYNAPTIC_NEUROTRANSMITTER_RECEPTOR_ACTIVITY		28	-0.83951	-2.43386	0	0	0	1223	tags=79%, list=9%, signal=86%
GOMF_CALMODULIN_BINDING	GOMF_CALMODULIN_BINDING		151	-0.61818	-2.4318	0	0	0	2184	tags=40%, list=16%, signal=47%
GOCC_GABA_ERGIC_SYNAPSE	GOCC_GABA_ERGIC_SYNAPSE		73	-0.678376	-2.43062	0	0	0	1932	tags=58%, list=14%, signal=67%
GOBP_REGULATION_OF_SYNAPSE_STRUCTURE_OR_ACTIVITY	GOBP_REGULATION_OF_SYNAPSE_STRUCTURE_OR_ACTIVITY		211	-0.590091	-2.43004	0	0	0	2905	tags=48%, list=21%, signal=61%
GOBP_LOCOMOTORY_BEHAVIOR	GOBP_LOCOMOTORY_BEHAVIOR		197	-0.597832	-2.42404	0	0	0	1795	tags=37%, list=13%, signal=42%
GOBP_REGULATED_EXOCYTOSIS	GOBP_REGULATED_EXOCYTOSIS		207	-0.590617	-2.41963	0	0	0	2904	tags=47%, list=21%, signal=59%
GOMF_NEUROTRANSMITTER_RECEPTOR_ACTIVITY	GOMF_NEUROTRANSMITTER_RECEPTOR_ACTIVITY		36	-0.786553	-2.41771	0	0	0	1223	tags=67%, list=9%, signal=73%
GOBP_REGULATION_OF_SYSTEM_PROCESS	GOBP_REGULATION_OF_SYSTEM_PROCESS		475	-0.546243	-2.40477	0	0	0	3003	tags=44%, list=22%, signal=55%
GOBP_ADENYLATE_CYCLASE_MODULATING_G_PROTEIN_COUPLED_RECEPTOR_SIGNALING_PATHWAY	GOBP_ADENYLATE_CYCLASE_MODULATING_G_PROTEIN_COUPLED_RECEPTOR_SIGNALING_PATHWAY		114	-0.631035	-2.40445	0	0	0	2661	tags=51%, list=20%, signal=63%
GOBP_PROTEIN_LOCALIZATION_TO_SYNAPSE	GOBP_PROTEIN_LOCALIZATION_TO_SYNAPSE		73	-0.676123	-2.40335	0	0	0	2520	tags=58%, list=19%, signal=70%
GOMF_LIGAND_GATED_CATION_CHANNEL_ACTIVITY	GOMF_LIGAND_GATED_CATION_CHANNEL_ACTIVITY		62	-0.69875	-2.39873	0	0	0	1412	tags=47%, list=10%, signal=52%
GOBP_REGULATION_OF_CATION_CHANNEL_ACTIVITY	GOBP_REGULATION_OF_CATION_CHANNEL_ACTIVITY		142	-0.620883	-2.39739	0	0	0	2977	tags=52%, list=22%, signal=66%
GOBP_REGULATION_OF_POTASSIUM_ION_TRANSPORT	GOBP_REGULATION_OF_POTASSIUM_ION_TRANSPORT		88	-0.662349	-2.39731	0	0	0	2933	tags=63%, list=22%, signal=79%
GOBP_SIGNAL_RELEASE	GOBP_SIGNAL_RELEASE		445	-0.541568	-2.39716	0	0	0	3017	tags=42%, list=22%, signal=52%
GOMF_SODIUM_CHANNEL_ACTIVITY	GOMF_SODIUM_CHANNEL_ACTIVITY		31	-0.801967	-2.39635	0	0	0	1412	tags=68%, list=10%, signal=75%
GOBP_REGULATION_OF_SYNAPSE_ASSEMBLY	GOBP_REGULATION_OF_SYNAPSE_ASSEMBLY		86	-0.656697	-2.39583	0	0	0	3397	tags=62%, list=25%, signal=82%
GOMF_CELL_ADHESION_MOLECULE_BINDING	GOMF_CELL_ADHESION_MOLECULE_BINDING		231	-0.579772	-2.39451	0	0	0	2580	tags=38%, list=19%, signal=46%
GOBP_COGNITION	GOBP_COGNITION		266	-0.568822	-2.38913	0	0	0	2463	tags=39%, list=18%, signal=46%
GOBP_TRANSMISSION_OF_NERVE_IMPULSE	GOBP_TRANSMISSION_OF_NERVE_IMPULSE		60	-0.698679	-2.38746	0	0	0	2638	tags=62%, list=19%, signal=76%
GOBP_HETEROPHILIC_CELL_CELL_ADHESION_VIA_PLASMA_MEMBRANE_CELL_ADHESION_MOLECULES	GOBP_HETEROPHILIC_CELL_CELL_ADHESION_VIA_PLASMA_MEMBRANE_CELL_ADHESION_MOLECULES		34	-0.777748	-2.38721	0	0	0	1186	tags=47%, list=9%, signal=51%
GOMF_SODIUM_ION_TRANSMEMBRANE_TRANSPORTER_ACTIVITY	GOMF_SODIUM_ION_TRANSMEMBRANE_TRANSPORTER_ACTIVITY		88	-0.657125	-2.38651	0	0	0	1573	tags=41%, list=12%, signal=46%
GOMF_VOLTAGE_GATED_POTASSIUM_CHANNEL_ACTIVITY	GOMF_VOLTAGE_GATED_POTASSIUM_CHANNEL_ACTIVITY		54	-0.719712	-2.38522	0	0	0	1892	tags=54%, list=14%, signal=62%
GOMF_CALCIUM_ION_BINDING	GOMF_CALCIUM_ION_BINDING		420	-0.541522	-2.38476	0	0	0	2491	tags=38%, list=18%, signal=45%
GOBP_REGULATION_OF_CALCIUM_ION_DEPENDENT_EXOCYTOSIS	GOBP_REGULATION_OF_CALCIUM_ION_DEPENDENT_EXOCYTOSIS		39	-0.748901	-2.38337	0	0	0	2285	tags=64%, list=17%, signal=77%
GOBP_REGULATION_OF_ION_TRANSMEMBRANE_TRANSPORT	GOBP_REGULATION_OF_ION_TRANSMEMBRANE_TRANSPORT		375	-0.550873	-2.38277	0	0	0	2977	tags=47%, list=22%, signal=58%
GOCC_DENDRITIC_SHAFT	GOCC_DENDRITIC_SHAFT		50	-0.731205	-2.3823	0	0	0	1626	tags=52%, list=12%, signal=59%
GOBP_REGULATION_OF_METAL_ION_TRANSPORT	GOBP_REGULATION_OF_METAL_ION_TRANSPORT		347	-0.55273	-2.38081	0	0	0	2968	tags=44%, list=22%, signal=54%
GOMF_LIGAND_GATED_CHANNEL_ACTIVITY	GOMF_LIGAND_GATED_CHANNEL_ACTIVITY		72	-0.673236	-2.38048	0	0	0	1436	tags=46%, list=11%, signal=51%
GOCC_SCHAFFER_COLLATERAL_CA1_SYNAPSE	GOCC_SCHAFFER_COLLATERAL_CA1_SYNAPSE		99	-0.637074	-2.37865	0	0	0	1943	tags=48%, list=14%, signal=56%
GOBP_STRIATED_MUSCLE_CONTRACTION	GOBP_STRIATED_MUSCLE_CONTRACTION		121	-0.618167	-2.37317	0	0	0	2967	tags=47%, list=22%, signal=60%
GOBP_REGULATION_OF_NEURON_PROJECTION_DEVELOPMENT	GOBP_REGULATION_OF_NEURON_PROJECTION_DEVELOPMENT		478	-0.533833	-2.36601	0	0	0	2995	tags=44%, list=22%, signal=55%
GOCC_I_BAND	GOCC_I_BAND		102	-0.629382	-2.36082	0	0	0	3056	tags=53%, list=23%, signal=68%
GOBP_MUSCLE_CONTRACTION	GOBP_MUSCLE_CONTRACTION		222	-0.570388	-2.36078	0	0	0	2988	tags=46%, list=22%, signal=59%
GOBP_REGULATION_OF_SYNAPTIC_TRANSMISSION_GLUTAMATERGIC	GOBP_REGULATION_OF_SYNAPTIC_TRANSMISSION_GLUTAMATERGIC		54	-0.701018	-2.3596	0	0	0	2104	tags=54%, list=16%, signal=63%
GOMF_NEUROTRANSMITTER_RECEPTOR_ACTIVITY_INVOLVED_IN_REGULATION_OF_POSTSYNAPTIC_MEMBRANE_POTENTIAL	GOMF_NEUROTRANSMITTER_RECEPTOR_ACTIVITY_INVOLVED_IN_REGULATION_OF_POSTSYNAPTIC_MEMBRANE_POTENTIAL		25	-0.830838	-2.35921	0	0	0	1223	tags=76%, list=9%, signal=83%
GOBP_NEURON_RECOGNITION	GOBP_NEURON_RECOGNITION		42	-0.738013	-2.35534	0	0	0	1143	tags=48%, list=8%, signal=52%
GOBP_REGULATION_OF_TRANSMEMBRANE_TRANSPORT	GOBP_REGULATION_OF_TRANSMEMBRANE_TRANSPORT		452	-0.532809	-2.3534	0	0	0	2977	tags=44%, list=22%, signal=54%
GOCC_SITE_OF_POLARIZED_GROWTH	GOCC_SITE_OF_POLARIZED_GROWTH		179	-0.583735	-2.35293	0	0	0	2938	tags=53%, list=22%, signal=66%
GOCC_VOLTAGE_GATED_POTASSIUM_CHANNEL_COMPLEX	GOCC_VOLTAGE_GATED_POTASSIUM_CHANNEL_COMPLEX		55	-0.702843	-2.35281	0	0	0	2308	tags=58%, list=17%, signal=70%
GOBP_CENTRAL_NERVOUS_SYSTEM_NEURON_DIFFERENTIATION	GOBP_CENTRAL_NERVOUS_SYSTEM_NEURON_DIFFERENTIATION		133	-0.605567	-2.34731	0	0	0	2806	tags=50%, list=21%, signal=63%
GOCC_SARCOLEMMA	GOCC_SARCOLEMMA		140	-0.601511	-2.34693	0	0	0	2568	tags=45%, list=19%, signal=55%
GOCC_NEURON_PROJECTION_MEMBRANE	GOCC_NEURON_PROJECTION_MEMBRANE		45	-0.71837	-2.34507	0	0	0	2308	tags=58%, list=17%, signal=69%
GOCC_PRESYNAPTIC_ACTIVE_ZONE_MEMBRANE	GOCC_PRESYNAPTIC_ACTIVE_ZONE_MEMBRANE		41	-0.743879	-2.34237	0	0	0	710	tags=49%, list=5%, signal=51%
GOBP_HINDBRAIN_DEVELOPMENT	GOBP_HINDBRAIN_DEVELOPMENT		142	-0.595358	-2.34215	0	0	0	2818	tags=50%, list=21%, signal=62%
GOCC_RECEPTOR_COMPLEX	GOCC_RECEPTOR_COMPLEX		285	-0.553656	-2.34068	0	0	0	1770	tags=27%, list=13%, signal=31%
GOBP_GLUTAMATE_RECEPTOR_SIGNALING_PATHWAY	GOBP_GLUTAMATE_RECEPTOR_SIGNALING_PATHWAY		35	-0.756563	-2.3398	0	0	0	1684	tags=60%, list=12%, signal=68%
GOCC_SYNAPTIC_VESICLE_MEMBRANE	GOCC_SYNAPTIC_VESICLE_MEMBRANE		92	-0.643453	-2.33952	0	0	0	2617	tags=54%, list=19%, signal=67%
GOCC_EXOCYTIC_VESICLE	GOCC_EXOCYTIC_VESICLE		216	-0.572044	-2.3388	0	0	0	2987	tags=49%, list=22%, signal=62%
GOBP_NEUROMUSCULAR_PROCESS	GOBP_NEUROMUSCULAR_PROCESS		131	-0.601968	-2.33568	0	0	0	2860	tags=50%, list=21%, signal=63%
GOMF_VOLTAGE_GATED_CALCIUM_CHANNEL_ACTIVITY	GOMF_VOLTAGE_GATED_CALCIUM_CHANNEL_ACTIVITY		27	-0.81871	-2.33342	0	0	0	1751	tags=74%, list=13%, signal=85%
GOBP_REGULATION_OF_CELL_JUNCTION_ASSEMBLY	GOBP_REGULATION_OF_CELL_JUNCTION_ASSEMBLY		175	-0.582116	-2.33267	0	0	0	2601	tags=41%, list=19%, signal=50%
GOCC_SODIUM_CHANNEL_COMPLEX	GOCC_SODIUM_CHANNEL_COMPLEX		21	-0.848175	-2.33063	0	0	0	962	tags=71%, list=7%, signal=77%
GOBP_REGULATION_OF_POTASSIUM_ION_TRANSMEMBRANE_TRANSPORT	GOBP_REGULATION_OF_POTASSIUM_ION_TRANSMEMBRANE_TRANSPORT		72	-0.658561	-2.32466	0	0	0	2114	tags=54%, list=16%, signal=64%
GOBP_SODIUM_ION_TRANSMEMBRANE_TRANSPORT	GOBP_SODIUM_ION_TRANSMEMBRANE_TRANSPORT		105	-0.619446	-2.32304	0	0	0	2967	tags=52%, list=22%, signal=67%
GOBP_REGULATION_OF_HEART_CONTRACTION	GOBP_REGULATION_OF_HEART_CONTRACTION		151	-0.587696	-2.32297	0	0	0	3088	tags=51%, list=23%, signal=65%
GOBP_LEARNING	GOBP_LEARNING		136	-0.597561	-2.32136	0	0	0	2275	tags=43%, list=17%, signal=51%
GOBP_G_PROTEIN_COUPLED_RECEPTOR_SIGNALING_PATHWAY	GOBP_G_PROTEIN_COUPLED_RECEPTOR_SIGNALING_PATHWAY		399	-0.532337	-2.32111	0	0	0	2620	tags=37%, list=19%, signal=45%
GOBP_SENSORY_PERCEPTION	GOBP_SENSORY_PERCEPTION		301	-0.542719	-2.32051	0	0	0	2818	tags=42%, list=21%, signal=52%
GOMF_CATION_TRANSMEMBRANE_TRANSPORTER_ACTIVITY	GOMF_CATION_TRANSMEMBRANE_TRANSPORTER_ACTIVITY		403	-0.534203	-2.32045	0	0	0	1799	tags=32%, list=13%, signal=36%
GOBP_REGULATION_OF_AXONOGENESIS	GOBP_REGULATION_OF_AXONOGENESIS		161	-0.576637	-2.32035	0	0	0	2783	tags=46%, list=21%, signal=57%
GOCC_POSTSYNAPTIC_SPECIALIZATION	GOCC_POSTSYNAPTIC_SPECIALIZATION		354	-0.5403	-2.31976	0	0	0	2933	tags=53%, list=22%, signal=65%
GOBP_SODIUM_ION_TRANSPORT	GOBP_SODIUM_ION_TRANSPORT		166	-0.576067	-2.31934	0	0	0	2365	tags=40%, list=17%, signal=48%
GOBP_CALCIUM_ION_REGULATED_EXOCYTOSIS_OF_NEUROTRANSMITTER	GOBP_CALCIUM_ION_REGULATED_EXOCYTOSIS_OF_NEUROTRANSMITTER		20	-0.857912	-2.31603	0	0	0	1642	tags=90%, list=12%, signal=102%
GOMF_EXTRACELLULAR_LIGAND_GATED_ION_CHANNEL_ACTIVITY	GOMF_EXTRACELLULAR_LIGAND_GATED_ION_CHANNEL_ACTIVITY		29	-0.786792	-2.31561	0	0	0	1223	tags=66%, list=9%, signal=72%
GOBP_NEURONAL_ACTION_POTENTIAL	GOBP_NEURONAL_ACTION_POTENTIAL		34	-0.749403	-2.30911	0	0	0	2396	tags=68%, list=18%, signal=82%
GOBP_REGULATION_OF_SYNAPTIC_PLASTICITY	GOBP_REGULATION_OF_SYNAPTIC_PLASTICITY		184	-0.574075	-2.30731	0	0	0	2977	tags=52%, list=22%, signal=65%
GOBP_ACTIN_FILAMENT_BASED_MOVEMENT	GOBP_ACTIN_FILAMENT_BASED_MOVEMENT		108	-0.620018	-2.3062	0	0	0	2967	tags=48%, list=22%, signal=61%
GOBP_PROTEIN_LOCALIZATION_TO_CELL_JUNCTION	GOBP_PROTEIN_LOCALIZATION_TO_CELL_JUNCTION		103	-0.621896	-2.3046	0	0	0	2520	tags=50%, list=19%, signal=62%
GOCC_INTEGRAL_COMPONENT_OF_SYNAPTIC_VESICLE_MEMBRANE	GOCC_INTEGRAL_COMPONENT_OF_SYNAPTIC_VESICLE_MEMBRANE		35	-0.76023	-2.30385	0	0	0	1554	tags=54%, list=11%, signal=61%
GOBP_CALCIUM_ION_TRANSPORT	GOBP_CALCIUM_ION_TRANSPORT		307	-0.541663	-2.30363	0	0	0	2577	tags=35%, list=19%, signal=42%
GOCC_TERMINAL_BOUTON	GOCC_TERMINAL_BOUTON		65	-0.668784	-2.30241	0	0	0	2146	tags=62%, list=16%, signal=73%
GOBP_REGULATION_OF_REGULATED_SECRETORY_PATHWAY	GOBP_REGULATION_OF_REGULATED_SECRETORY_PATHWAY		136	-0.588237	-2.29956	0	0	0	2689	tags=45%, list=20%, signal=55%
GOCC_VOLTAGE_GATED_CALCIUM_CHANNEL_COMPLEX	GOCC_VOLTAGE_GATED_CALCIUM_CHANNEL_COMPLEX		20	-0.859039	-2.29737	0	0	0	1797	tags=95%, list=13%, signal=109%
GOMF_PDZ_DOMAIN_BINDING	GOMF_PDZ_DOMAIN_BINDING		99	-0.610879	-2.29583	0	0	0	1384	tags=33%, list=10%, signal=37%
GOBP_LONG_TERM_SYNAPTIC_POTENTIATION	GOBP_LONG_TERM_SYNAPTIC_POTENTIATION		89	-0.626961	-2.29381	0	0	0	2565	tags=49%, list=19%, signal=61%
GOBP_NEURON_MIGRATION	GOBP_NEURON_MIGRATION		151	-0.581842	-2.29259	0	0	0	2755	tags=51%, list=20%, signal=63%
GOBP_REGULATION_OF_MUSCLE_CONTRACTION	GOBP_REGULATION_OF_MUSCLE_CONTRACTION		128	-0.597898	-2.2904	0	0	0	2988	tags=48%, list=22%, signal=61%
GOCC_PLASMA_MEMBRANE_RAFT	GOCC_PLASMA_MEMBRANE_RAFT		107	-0.612774	-2.28967	0	0	0	1436	tags=32%, list=11%, signal=35%
GOBP_CARDIAC_MUSCLE_CONTRACTION	GOBP_CARDIAC_MUSCLE_CONTRACTION		100	-0.612809	-2.28842	0	0	0	2967	tags=48%, list=22%, signal=61%
GOBP_REGULATION_OF_BLOOD_CIRCULATION	GOBP_REGULATION_OF_BLOOD_CIRCULATION		199	-0.570057	-2.28522	0	0	0	3088	tags=50%, list=23%, signal=63%
GOBP_REGULATION_OF_ACTION_POTENTIAL	GOBP_REGULATION_OF_ACTION_POTENTIAL		56	-0.668941	-2.28378	0	0	0	2988	tags=61%, list=22%, signal=78%
GOBP_POSTSYNAPSE_ORGANIZATION	GOBP_POSTSYNAPSE_ORGANIZATION		174	-0.568305	-2.2828	0	0	0	2282	tags=40%, list=17%, signal=48%
GOBP_REGULATION_OF_SYNAPTIC_VESICLE_EXOCYTOSIS	GOBP_REGULATION_OF_SYNAPTIC_VESICLE_EXOCYTOSIS		65	-0.662202	-2.28233	0	0	0	1865	tags=46%, list=14%, signal=53%
GOBP_EXTERNAL_ENCAPSULATING_STRUCTURE_ORGANIZATION	GOBP_EXTERNAL_ENCAPSULATING_STRUCTURE_ORGANIZATION		256	-0.545001	-2.28204	0	0	0	3495	tags=46%, list=26%, signal=61%
GOBP_ACTIN_MEDIATED_CELL_CONTRACTION	GOBP_ACTIN_MEDIATED_CELL_CONTRACTION		79	-0.640852	-2.28056	0	0	0	2967	tags=57%, list=22%, signal=72%
GOCC_EXTERNAL_ENCAPSULATING_STRUCTURE	GOCC_EXTERNAL_ENCAPSULATING_STRUCTURE		381	-0.519869	-2.27949	0	0	0	3132	tags=44%, list=23%, signal=56%
GOBP_CALCIUM_ION_IMPORT	GOBP_CALCIUM_ION_IMPORT		45	-0.714888	-2.2789	0	0	0	1704	tags=38%, list=13%, signal=43%
GOBP_MODULATION_OF_EXCITATORY_POSTSYNAPTIC_POTENTIAL	GOBP_MODULATION_OF_EXCITATORY_POSTSYNAPTIC_POTENTIAL		46	-0.697799	-2.27826	0	0	0	2104	tags=52%, list=16%, signal=62%
GOBP_METENCEPHALON_DEVELOPMENT	GOBP_METENCEPHALON_DEVELOPMENT		98	-0.6114	-2.27567	0	0	0	2818	tags=54%, list=21%, signal=68%
GOMF_SYNTAXIN_BINDING	GOMF_SYNTAXIN_BINDING		70	-0.641212	-2.27136	0	0	0	1783	tags=47%, list=13%, signal=54%
GOBP_REGULATION_OF_CATION_TRANSMEMBRANE_TRANSPORT	GOBP_REGULATION_OF_CATION_TRANSMEMBRANE_TRANSPORT		307	-0.530504	-2.2707	0	0	0	2977	tags=45%, list=22%, signal=56%
GOBP_REGULATION_OF_NEUROTRANSMITTER_RECEPTOR_ACTIVITY	GOBP_REGULATION_OF_NEUROTRANSMITTER_RECEPTOR_ACTIVITY		48	-0.679453	-2.26936	0	0	0	2977	tags=63%, list=22%, signal=80%
GOBP_RESPONSE_TO_MECHANICAL_STIMULUS	GOBP_RESPONSE_TO_MECHANICAL_STIMULUS		112	-0.601375	-2.26889	0	0	0	1907	tags=35%, list=14%, signal=40%
GOBP_SYNAPTIC_VESICLE_RECYCLING	GOBP_SYNAPTIC_VESICLE_RECYCLING		79	-0.634101	-2.26734	0	0	0	1988	tags=46%, list=15%, signal=53%
GOBP_RESPONSE_TO_CATECHOLAMINE	GOBP_RESPONSE_TO_CATECHOLAMINE		57	-0.670813	-2.26694	0	0	0	1797	tags=47%, list=13%, signal=54%
GOBP_CALCIUM_ION_TRANSMEMBRANE_TRANSPORT	GOBP_CALCIUM_ION_TRANSMEMBRANE_TRANSPORT		219	-0.55623	-2.26578	0	0	0	2577	tags=38%, list=19%, signal=46%
GOBP_DETECTION_OF_EXTERNAL_STIMULUS	GOBP_DETECTION_OF_EXTERNAL_STIMULUS		69	-0.638788	-2.26479	0	0	0	2052	tags=39%, list=15%, signal=46%
GOBP_POSITIVE_REGULATION_OF_EXCITATORY_POSTSYNAPTIC_POTENTIAL	GOBP_POSITIVE_REGULATION_OF_EXCITATORY_POSTSYNAPTIC_POTENTIAL		32	-0.733791	-2.26476	0	0	0	1684	tags=53%, list=12%, signal=61%
GOBP_POSITIVE_REGULATION_OF_CELL_PROJECTION_ORGANIZATION	GOBP_POSITIVE_REGULATION_OF_CELL_PROJECTION_ORGANIZATION		377	-0.520858	-2.26378	0	0	0	3104	tags=44%, list=23%, signal=55%
GOBP_SYNAPTIC_MEMBRANE_ADHESION	GOBP_SYNAPTIC_MEMBRANE_ADHESION		29	-0.760479	-2.26273	0	0	0	1459	tags=59%, list=11%, signal=66%
GOBP_CALCIUM_ION_TRANSMEMBRANE_IMPORT_INTO_CYTOSOL	GOBP_CALCIUM_ION_TRANSMEMBRANE_IMPORT_INTO_CYTOSOL		125	-0.589973	-2.25905	0	0	0	2968	tags=46%, list=22%, signal=58%
GOBP_SECOND_MESSENGER_MEDIATED_SIGNALING	GOBP_SECOND_MESSENGER_MEDIATED_SIGNALING		204	-0.551051	-2.25618	0	0	0	2983	tags=42%, list=22%, signal=53%
GOBP_REGULATION_OF_CALCIUM_ION_TRANSPORT	GOBP_REGULATION_OF_CALCIUM_ION_TRANSPORT		218	-0.542064	-2.25462	0	0	0	1948	tags=31%, list=14%, signal=35%
GOBP_CELL_MATRIX_ADHESION	GOBP_CELL_MATRIX_ADHESION		188	-0.56271	-2.25076	0	0	0	2999	tags=42%, list=22%, signal=53%
GOCC_NEUROTRANSMITTER_RECEPTOR_COMPLEX	GOCC_NEUROTRANSMITTER_RECEPTOR_COMPLEX		32	-0.737886	-2.25062	0	0	0	1770	tags=59%, list=13%, signal=68%
GOBP_ADULT_LOCOMOTORY_BEHAVIOR	GOBP_ADULT_LOCOMOTORY_BEHAVIOR		86	-0.619277	-2.25045	0	0	0	1556	tags=41%, list=11%, signal=46%
GOMF_INORGANIC_MOLECULAR_ENTITY_TRANSMEMBRANE_TRANSPORTER_ACTIVITY	GOMF_INORGANIC_MOLECULAR_ENTITY_TRANSMEMBRANE_TRANSPORTER_ACTIVITY		442	-0.512386	-2.24719	0	0	0	1799	tags=30%, list=13%, signal=34%
GOCC_INTRINSIC_COMPONENT_OF_SYNAPTIC_VESICLE_MEMBRANE	GOCC_INTRINSIC_COMPONENT_OF_SYNAPTIC_VESICLE_MEMBRANE		47	-0.688986	-2.24718	0	0	0	2617	tags=55%, list=19%, signal=68%
GOBP_CATECHOLAMINE_SECRETION	GOBP_CATECHOLAMINE_SECRETION		49	-0.681311	-2.24374	0	0	0	2442	tags=57%, list=18%, signal=69%
GOBP_CARDIAC_MUSCLE_CELL_CONTRACTION	GOBP_CARDIAC_MUSCLE_CELL_CONTRACTION		60	-0.654284	-2.24232	0	0	0	2967	tags=58%, list=22%, signal=74%
GOBP_INORGANIC_ION_IMPORT_ACROSS_PLASMA_MEMBRANE	GOBP_INORGANIC_ION_IMPORT_ACROSS_PLASMA_MEMBRANE		83	-0.619316	-2.23939	0	0	0	1733	tags=35%, list=13%, signal=40%
GOBP_CARTILAGE_DEVELOPMENT	GOBP_CARTILAGE_DEVELOPMENT		167	-0.560077	-2.23668	0	0	0	3334	tags=49%, list=25%, signal=64%
GOCC_CAVEOLA	GOCC_CAVEOLA		81	-0.613057	-2.23642	0	0	0	1638	tags=33%, list=12%, signal=38%
GOBP_CALCIUM_DEPENDENT_CELL_CELL_ADHESION_VIA_PLASMA_MEMBRANE_CELL_ADHESION_MOLECULES	GOBP_CALCIUM_DEPENDENT_CELL_CELL_ADHESION_VIA_PLASMA_MEMBRANE_CELL_ADHESION_MOLECULES		23	-0.794047	-2.23603	0	0	0	2470	tags=70%, list=18%, signal=85%
GOBP_DETECTION_OF_MECHANICAL_STIMULUS	GOBP_DETECTION_OF_MECHANICAL_STIMULUS		39	-0.70678	-2.23433	0	0	0	1907	tags=46%, list=14%, signal=54%
GOCC_T_TUBULE	GOCC_T_TUBULE		58	-0.660973	-2.23405	0	0	0	3374	tags=60%, list=25%, signal=80%
GOBP_SENSORY_PERCEPTION_OF_PAIN	GOBP_SENSORY_PERCEPTION_OF_PAIN		103	-0.601994	-2.22911	0	0	0	2307	tags=44%, list=17%, signal=52%
GOBP_CONNECTIVE_TISSUE_DEVELOPMENT	GOBP_CONNECTIVE_TISSUE_DEVELOPMENT		229	-0.539996	-2.22554	0	0	0	3242	tags=45%, list=24%, signal=58%
GOBP_CELL_SURFACE_RECEPTOR_SIGNALING_PATHWAY_INVOLVED_IN_CELL_CELL_SIGNALING	GOBP_CELL_SURFACE_RECEPTOR_SIGNALING_PATHWAY_INVOLVED_IN_CELL_CELL_SIGNALING		434	-0.506116	-2.22176	0	0	0	3305	tags=41%, list=24%, signal=52%
GOBP_REGULATION_OF_EXOCYTOSIS	GOBP_REGULATION_OF_EXOCYTOSIS		189	-0.547222	-2.22163	0	0	0	2689	tags=40%, list=20%, signal=49%
GOBP_HEART_PROCESS	GOBP_HEART_PROCESS		193	-0.550911	-2.22105	0	0	0	3088	tags=45%, list=23%, signal=58%
GOBP_CELL_SUBSTRATE_JUNCTION_ORGANIZATION	GOBP_CELL_SUBSTRATE_JUNCTION_ORGANIZATION		91	-0.601063	-2.20995	0	0	0	2458	tags=44%, list=18%, signal=53%
GOBP_AMINE_TRANSPORT	GOBP_AMINE_TRANSPORT		83	-0.611043	-2.20906	0	0	0	2442	tags=47%, list=18%, signal=57%
GOBP_PRESYNAPSE_ORGANIZATION	GOBP_PRESYNAPSE_ORGANIZATION		44	-0.683228	-2.20524	0	0	0	3397	tags=66%, list=25%, signal=88%
GOCC_INHIBITORY_SYNAPSE	GOCC_INHIBITORY_SYNAPSE		22	-0.78182	-2.20519	0	0	0	1858	tags=59%, list=14%, signal=68%
GOCC_INTRINSIC_COMPONENT_OF_PRESYNAPTIC_ACTIVE_ZONE_MEMBRANE	GOCC_INTRINSIC_COMPONENT_OF_PRESYNAPTIC_ACTIVE_ZONE_MEMBRANE		27	-0.745744	-2.20491	0	0	0	710	tags=48%, list=5%, signal=51%
GOCC_PRESYNAPTIC_ACTIVE_ZONE	GOCC_PRESYNAPTIC_ACTIVE_ZONE		82	-0.609176	-2.20379	0	0	0	1931	tags=51%, list=14%, signal=59%
GOBP_REGULATION_OF_TRANSPORTER_ACTIVITY	GOBP_REGULATION_OF_TRANSPORTER_ACTIVITY		237	-0.536161	-2.20294	0	0	0	2977	tags=46%, list=22%, signal=58%
GOBP_RECEPTOR_LOCALIZATION_TO_SYNAPSE	GOBP_RECEPTOR_LOCALIZATION_TO_SYNAPSE		61	-0.641884	-2.20293	0	0	0	2520	tags=52%, list=19%, signal=64%
GOBP_NEURON_PROJECTION_ORGANIZATION	GOBP_NEURON_PROJECTION_ORGANIZATION		96	-0.598402	-2.19744	0	0	0	1684	tags=32%, list=12%, signal=37%
GOBP_EXOCYTOSIS	GOBP_EXOCYTOSIS		313	-0.511689	-2.19421	0	0	0	2805	tags=38%, list=21%, signal=47%
GOBP_POSITIVE_REGULATION_OF_NEURON_PROJECTION_DEVELOPMENT	GOBP_POSITIVE_REGULATION_OF_NEURON_PROJECTION_DEVELOPMENT		195	-0.534833	-2.19311	0	0	0	3040	tags=45%, list=22%, signal=57%
GOBP_CALCIUM_ION_IMPORT_ACROSS_PLASMA_MEMBRANE	GOBP_CALCIUM_ION_IMPORT_ACROSS_PLASMA_MEMBRANE		28	-0.749574	-2.19188	0	0	0	1434	tags=46%, list=11%, signal=52%
GOCC_COLLAGEN_CONTAINING_EXTRACELLULAR_MATRIX	GOCC_COLLAGEN_CONTAINING_EXTRACELLULAR_MATRIX		298	-0.516371	-2.19007	0	0	0	3132	tags=45%, list=23%, signal=57%
GOCC_COLLAGEN_TRIMER	GOCC_COLLAGEN_TRIMER		62	-0.64199	-2.18833	0	0	0	3081	tags=60%, list=23%, signal=77%
GOBP_SYNAPTIC_TRANSMISSION_GABAERGIC	GOBP_SYNAPTIC_TRANSMISSION_GABAERGIC		45	-0.671819	-2.18824	0	0	0	1116	tags=42%, list=8%, signal=46%
GOBP_INNERVATION	GOBP_INNERVATION		27	-0.748483	-2.18776	0	0	0	1774	tags=59%, list=13%, signal=68%
GOCC_ADHERENS_JUNCTION	GOCC_ADHERENS_JUNCTION		117	-0.579205	-2.18705	0	0	0	3394	tags=50%, list=25%, signal=67%
GOBP_CARDIAC_CONDUCTION	GOBP_CARDIAC_CONDUCTION		56	-0.639696	-2.18432	0	0	0	2713	tags=50%, list=20%, signal=62%
GOBP_CELL_SUBSTRATE_ADHESION	GOBP_CELL_SUBSTRATE_ADHESION		307	-0.510722	-2.18109	0	0	0	3003	tags=39%, list=22%, signal=49%
GOBP_MEMORY	GOBP_MEMORY		127	-0.564773	-2.1792	0	0	0	2632	tags=43%, list=19%, signal=52%
GOBP_GLOMERULUS_DEVELOPMENT	GOBP_GLOMERULUS_DEVELOPMENT		55	-0.641629	-2.17691	0	0	0	2742	tags=51%, list=20%, signal=64%
GOCC_PLASMA_MEMBRANE_SIGNALING_RECEPTOR_COMPLEX	GOCC_PLASMA_MEMBRANE_SIGNALING_RECEPTOR_COMPLEX		129	-0.568314	-2.17675	0	0	0	1770	tags=29%, list=13%, signal=34%
GOBP_NEGATIVE_REGULATION_OF_PROTEIN_CONTAINING_COMPLEX_DISASSEMBLY	GOBP_NEGATIVE_REGULATION_OF_PROTEIN_CONTAINING_COMPLEX_DISASSEMBLY		77	-0.602866	-2.17644	0	0	0	2184	tags=43%, list=16%, signal=51%
GOBP_MEMBRANE_DEPOLARIZATION_DURING_ACTION_POTENTIAL	GOBP_MEMBRANE_DEPOLARIZATION_DURING_ACTION_POTENTIAL		24	-0.767151	-2.17572	0	0	0	919	tags=54%, list=7%, signal=58%
GOBP_MUSCLE_SYSTEM_PROCESS	GOBP_MUSCLE_SYSTEM_PROCESS		308	-0.508332	-2.1754	0	0	0	2988	tags=42%, list=22%, signal=53%
GOBP_FOREBRAIN_DEVELOPMENT	GOBP_FOREBRAIN_DEVELOPMENT		292	-0.514218	-2.17526	0	0	0	2806	tags=40%, list=21%, signal=50%
GOBP_POSITIVE_REGULATION_OF_GTPASE_ACTIVITY	GOBP_POSITIVE_REGULATION_OF_GTPASE_ACTIVITY		232	-0.521304	-2.17483	0	0	0	3516	tags=47%, list=26%, signal=62%
GOBP_ADENYLATE_CYCLASE_ACTIVATING_G_PROTEIN_COUPLED_RECEPTOR_SIGNALING_PATHWAY	GOBP_ADENYLATE_CYCLASE_ACTIVATING_G_PROTEIN_COUPLED_RECEPTOR_SIGNALING_PATHWAY		75	-0.615302	-2.17475	0	0	0	2661	tags=48%, list=20%, signal=59%
GOBP_POSITIVE_REGULATION_OF_POTASSIUM_ION_TRANSPORT	GOBP_POSITIVE_REGULATION_OF_POTASSIUM_ION_TRANSPORT		41	-0.678492	-2.17359	0	0	0	3060	tags=61%, list=23%, signal=78%
GOBP_POSITIVE_REGULATION_OF_ION_TRANSPORT	GOBP_POSITIVE_REGULATION_OF_ION_TRANSPORT		258	-0.517235	-2.17321	0	0	0	2977	tags=39%, list=22%, signal=49%
GOBP_DENDRITIC_SPINE_DEVELOPMENT	GOBP_DENDRITIC_SPINE_DEVELOPMENT		119	-0.560293	-2.17	0	0	0	2808	tags=40%, list=21%, signal=50%
GOBP_NEGATIVE_REGULATION_OF_AXONOGENESIS	GOBP_NEGATIVE_REGULATION_OF_AXONOGENESIS		62	-0.642599	-2.16957	0	0	0	2783	tags=45%, list=21%, signal=57%
GOCC_DENSE_CORE_GRANULE	GOCC_DENSE_CORE_GRANULE		28	-0.723704	-2.1685	0	0	0	1642	tags=54%, list=12%, signal=61%
GOBP_PROTEIN_LOCALIZATION_TO_POSTSYNAPSE	GOBP_PROTEIN_LOCALIZATION_TO_POSTSYNAPSE		46	-0.661395	-2.16709	0	0	0	2520	tags=54%, list=19%, signal=67%
GOBP_REGULATION_OF_HEART_RATE	GOBP_REGULATION_OF_HEART_RATE		84	-0.600753	-2.16619	0	0	0	2935	tags=51%, list=22%, signal=65%
GOBP_DETECTION_OF_STIMULUS	GOBP_DETECTION_OF_STIMULUS		116	-0.570385	-2.16461	0	0	0	2114	tags=31%, list=16%, signal=36%
GOBP_REGULATION_OF_POSTSYNAPTIC_MEMBRANE_NEUROTRANSMITTER_RECEPTOR_LEVELS	GOBP_REGULATION_OF_POSTSYNAPTIC_MEMBRANE_NEUROTRANSMITTER_RECEPTOR_LEVELS		80	-0.596846	-2.16447	0	0	0	3176	tags=55%, list=23%, signal=71%
GOBP_DETECTION_OF_STIMULUS_INVOLVED_IN_SENSORY_PERCEPTION	GOBP_DETECTION_OF_STIMULUS_INVOLVED_IN_SENSORY_PERCEPTION		57	-0.627443	-2.16396	0	0	0	2052	tags=39%, list=15%, signal=45%
GOMF_ACTIN_BINDING	GOMF_ACTIN_BINDING		340	-0.503326	-2.16394	0	0	0	2686	tags=35%, list=20%, signal=43%
GOBP_CARDIAC_MUSCLE_CELL_ACTION_POTENTIAL	GOBP_CARDIAC_MUSCLE_CELL_ACTION_POTENTIAL		49	-0.65898	-2.16248	0	0	0	2935	tags=57%, list=22%, signal=73%
GOCC_ACTIN_BASED_CELL_PROJECTION	GOCC_ACTIN_BASED_CELL_PROJECTION		180	-0.538365	-2.16225	0	0	0	2922	tags=36%, list=22%, signal=45%
GOBP_CHONDROCYTE_DIFFERENTIATION	GOBP_CHONDROCYTE_DIFFERENTIATION		98	-0.584583	-2.16	0	0	0	3334	tags=51%, list=25%, signal=67%
GOBP_CENTRAL_NERVOUS_SYSTEM_PROJECTION_NEURON_AXONOGENESIS	GOBP_CENTRAL_NERVOUS_SYSTEM_PROJECTION_NEURON_AXONOGENESIS		27	-0.753347	-2.15998	0	0	0	1651	tags=56%, list=12%, signal=63%
GOCC_CELL_LEADING_EDGE	GOCC_CELL_LEADING_EDGE		352	-0.503573	-2.15229	0	5.32225e-06	0.001	3002	tags=41%, list=22%, signal=51%
GOBP_POSITIVE_REGULATION_OF_TRANSMEMBRANE_TRANSPORT	GOBP_POSITIVE_REGULATION_OF_TRANSMEMBRANE_TRANSPORT		206	-0.524366	-2.1525	0	5.34539e-06	0.001	2977	tags=40%, list=22%, signal=51%
GOBP_CELLULAR_RESPONSE_TO_METAL_ION	GOBP_CELLULAR_RESPONSE_TO_METAL_ION		129	-0.548101	-2.15326	0	5.36874e-06	0.001	2465	tags=33%, list=18%, signal=39%
GOCC_SARCOPLASM	GOCC_SARCOPLASM		78	-0.602298	-2.15367	0	5.39228e-06	0.001	3633	tags=60%, list=27%, signal=82%
GOBP_POSITIVE_REGULATION_OF_POTASSIUM_ION_TRANSMEMBRANE_TRANSPORT	GOBP_POSITIVE_REGULATION_OF_POTASSIUM_ION_TRANSMEMBRANE_TRANSPORT		33	-0.702506	-2.15498	0	5.41604e-06	0.001	2114	tags=52%, list=16%, signal=61%
GOBP_NEGATIVE_REGULATION_OF_SYNAPTIC_TRANSMISSION	GOBP_NEGATIVE_REGULATION_OF_SYNAPTIC_TRANSMISSION		63	-0.63133	-2.15617	0	5.44e-06	0.001	2396	tags=54%, list=18%, signal=65%
GOCC_ANCHORED_COMPONENT_OF_PLASMA_MEMBRANE	GOCC_ANCHORED_COMPONENT_OF_PLASMA_MEMBRANE		45	-0.665643	-2.15093	0	1.06234e-05	0.002	1215	tags=27%, list=9%, signal=29%
GOBP_REGULATION_OF_PROTEIN_DEPOLYMERIZATION	GOBP_REGULATION_OF_PROTEIN_DEPOLYMERIZATION		80	-0.607889	-2.15143	0	1.06692e-05	0.002	2199	tags=45%, list=16%, signal=53%
GOBP_SPONTANEOUS_SYNAPTIC_TRANSMISSION	GOBP_SPONTANEOUS_SYNAPTIC_TRANSMISSION		17	-0.825768	-2.14786	0	1.6018e-05	0.003	1595	tags=71%, list=12%, signal=80%
GOBP_FOCAL_ADHESION_ASSEMBLY	GOBP_FOCAL_ADHESION_ASSEMBLY		76	-0.603723	-2.15029	0	1.60865e-05	0.003	2601	tags=43%, list=19%, signal=53%
GOBP_SECRETORY_GRANULE_LOCALIZATION	GOBP_SECRETORY_GRANULE_LOCALIZATION		19	-0.787816	-2.13681	0	2.02778e-05	0.004	1642	tags=53%, list=12%, signal=60%
GOBP_SYNAPTIC_VESICLE_PRIMING	GOBP_SYNAPTIC_VESICLE_PRIMING		24	-0.751778	-2.14038	0	2.03603e-05	0.004	1865	tags=67%, list=14%, signal=77%
GOBP_MULTICELLULAR_ORGANISMAL_RESPONSE_TO_STRESS	GOBP_MULTICELLULAR_ORGANISMAL_RESPONSE_TO_STRESS		82	-0.592354	-2.14042	0	2.04434e-05	0.004	3050	tags=54%, list=22%, signal=69%
GOBP_REGULATION_OF_SMALL_GTPASE_MEDIATED_SIGNAL_TRANSDUCTION	GOBP_REGULATION_OF_SMALL_GTPASE_MEDIATED_SIGNAL_TRANSDUCTION		202	-0.528843	-2.14066	0	2.05272e-05	0.004	2977	tags=42%, list=22%, signal=52%
GOBP_CELL_DIFFERENTIATION_IN_HINDBRAIN	GOBP_CELL_DIFFERENTIATION_IN_HINDBRAIN		25	-0.757292	-2.14093	0	2.06116e-05	0.004	2550	tags=72%, list=19%, signal=88%
GOBP_CIRCULATORY_SYSTEM_PROCESS	GOBP_CIRCULATORY_SYSTEM_PROCESS		419	-0.488645	-2.14146	0	2.06968e-05	0.004	3003	tags=40%, list=22%, signal=49%
GOBP_REGULATION_OF_NERVOUS_SYSTEM_DEVELOPMENT	GOBP_REGULATION_OF_NERVOUS_SYSTEM_DEVELOPMENT		442	-0.488381	-2.14188	0	2.07827e-05	0.004	3017	tags=40%, list=22%, signal=50%
GOCC_CATENIN_COMPLEX	GOCC_CATENIN_COMPLEX		20	-0.784052	-2.14266	0	2.08693e-05	0.004	2075	tags=55%, list=15%, signal=65%
GOCC_DENDRITE_MEMBRANE	GOCC_DENDRITE_MEMBRANE		29	-0.709335	-2.14317	0	2.09566e-05	0.004	3732	tags=86%, list=28%, signal=119%
GOBP_NEURON_PROJECTION_ARBORIZATION	GOBP_NEURON_PROJECTION_ARBORIZATION		26	-0.739933	-2.14555	0	2.10446e-05	0.004	1328	tags=46%, list=10%, signal=51%
GOBP_POSITIVE_REGULATION_OF_SYNAPSE_ASSEMBLY	GOBP_POSITIVE_REGULATION_OF_SYNAPSE_ASSEMBLY		53	-0.645631	-2.14738	0	2.11334e-05	0.004	3397	tags=60%, list=25%, signal=80%
GOBP_DOPAMINE_SECRETION	GOBP_DOPAMINE_SECRETION		30	-0.720507	-2.14756	0	2.1223e-05	0.004	2442	tags=67%, list=18%, signal=81%
GOBP_DEVELOPMENTAL_GROWTH_INVOLVED_IN_MORPHOGENESIS	GOBP_DEVELOPMENTAL_GROWTH_INVOLVED_IN_MORPHOGENESIS		233	-0.51663	-2.13378	0	2.51684e-05	0.005	2848	tags=44%, list=21%, signal=54%
GOMF_CADHERIN_BINDING	GOMF_CADHERIN_BINDING		55	-0.636019	-2.13201	0	2.99465e-05	0.006	2565	tags=44%, list=19%, signal=54%
GOMF_TRANSMEMBRANE_TRANSPORTER_BINDING	GOMF_TRANSMEMBRANE_TRANSPORTER_BINDING		122	-0.559286	-2.13321	0	3.00668e-05	0.006	1802	tags=39%, list=13%, signal=44%
GOBP_NEUROMUSCULAR_SYNAPTIC_TRANSMISSION	GOBP_NEUROMUSCULAR_SYNAPTIC_TRANSMISSION		23	-0.760966	-2.12983	0	3.42631e-05	0.007	2638	tags=74%, list=19%, signal=92%
GOMF_STRUCTURAL_CONSTITUENT_OF_SYNAPSE	GOMF_STRUCTURAL_CONSTITUENT_OF_SYNAPSE		29	-0.72131	-2.12997	0	3.43986e-05	0.007	1943	tags=72%, list=14%, signal=84%
GOBP_SYNAPTIC_VESICLE_LOCALIZATION	GOBP_SYNAPTIC_VESICLE_LOCALIZATION		55	-0.634917	-2.13079	0	3.45351e-05	0.007	1988	tags=45%, list=15%, signal=53%
GOBP_REGULATION_OF_POSTSYNAPSE_ORGANIZATION	GOBP_REGULATION_OF_POSTSYNAPSE_ORGANIZATION		94	-0.582263	-2.13125	0	3.46726e-05	0.007	1994	tags=33%, list=15%, signal=38%
GOBP_REGULATION_OF_NEURON_MIGRATION	GOBP_REGULATION_OF_NEURON_MIGRATION		46	-0.659907	-2.12625	0	4.33033e-05	0.009	2691	tags=59%, list=20%, signal=73%
GOCC_CELL_CELL_JUNCTION	GOCC_CELL_CELL_JUNCTION		405	-0.487418	-2.1274	0	4.34711e-05	0.009	2581	tags=32%, list=19%, signal=38%
GOCC_TRANSPORTER_COMPLEX	GOCC_TRANSPORTER_COMPLEX		251	-0.506032	-2.12825	0	4.36403e-05	0.009	1797	tags=39%, list=13%, signal=45%
GOCC_TRANSPORT_VESICLE	GOCC_TRANSPORT_VESICLE		294	-0.501518	-2.12838	0	4.38107e-05	0.009	2987	tags=43%, list=22%, signal=54%
GOBP_REGULATION_OF_CALCIUM_ION_TRANSMEMBRANE_TRANSPORT	GOBP_REGULATION_OF_CALCIUM_ION_TRANSMEMBRANE_TRANSPORT		146	-0.547877	-2.1286	0	4.39825e-05	0.009	2577	tags=39%, list=19%, signal=48%
GOBP_REGULATION_OF_SODIUM_ION_TRANSPORT	GOBP_REGULATION_OF_SODIUM_ION_TRANSPORT		84	-0.586557	-2.12361	0	4.71245e-05	0.01	2967	tags=51%, list=22%, signal=65%
GOBP_CATECHOLAMINE_TRANSPORT	GOBP_CATECHOLAMINE_TRANSPORT		58	-0.62476	-2.12426	0	4.7303e-05	0.01	2442	tags=53%, list=18%, signal=65%
GOMF_CALCIUM_DEPENDENT_PHOSPHOLIPID_BINDING	GOMF_CALCIUM_DEPENDENT_PHOSPHOLIPID_BINDING		43	-0.650435	-2.12442	0	4.74829e-05	0.01	2356	tags=40%, list=17%, signal=48%
GOCC_CELL_CELL_CONTACT_ZONE	GOCC_CELL_CELL_CONTACT_ZONE		74	-0.604331	-2.12491	0	4.76641e-05	0.01	1717	tags=32%, list=13%, signal=37%
GOBP_CARDIAC_CHAMBER_DEVELOPMENT	GOBP_CARDIAC_CHAMBER_DEVELOPMENT		154	-0.533701	-2.12492	0	4.78467e-05	0.01	2896	tags=42%, list=21%, signal=52%
GOMF_EXTRACELLULAR_MATRIX_STRUCTURAL_CONSTITUENT_CONFERRING_TENSILE_STRENGTH	GOMF_EXTRACELLULAR_MATRIX_STRUCTURAL_CONSTITUENT_CONFERRING_TENSILE_STRENGTH		33	-0.693032	-2.12529	0	4.80307e-05	0.01	2760	tags=67%, list=20%, signal=83%
GOBP_POSITIVE_REGULATION_OF_NERVOUS_SYSTEM_DEVELOPMENT	GOBP_POSITIVE_REGULATION_OF_NERVOUS_SYSTEM_DEVELOPMENT		284	-0.502467	-2.11212	0	5.01723e-05	0.011	3017	tags=42%, list=22%, signal=52%
GOBP_REGULATION_OF_BEHAVIOR	GOBP_REGULATION_OF_BEHAVIOR		62	-0.617965	-2.11213	0	5.03561e-05	0.011	2225	tags=42%, list=16%, signal=50%
GOBP_POSITIVE_REGULATION_OF_ION_TRANSMEMBRANE_TRANSPORT	GOBP_POSITIVE_REGULATION_OF_ION_TRANSMEMBRANE_TRANSPORT		160	-0.535024	-2.11224	0	5.05413e-05	0.011	1897	tags=33%, list=14%, signal=37%
GOCC_FILOPODIUM	GOCC_FILOPODIUM		82	-0.590572	-2.11311	0	5.07278e-05	0.011	2897	tags=48%, list=21%, signal=60%
GOBP_CARDIAC_SEPTUM_DEVELOPMENT	GOBP_CARDIAC_SEPTUM_DEVELOPMENT		104	-0.563821	-2.11398	0	5.09156e-05	0.011	3331	tags=50%, list=25%, signal=66%
GOBP_BONE_DEVELOPMENT	GOBP_BONE_DEVELOPMENT		197	-0.52271	-2.11672	0	5.11049e-05	0.011	2898	tags=43%, list=21%, signal=54%
GOCC_LEADING_EDGE_MEMBRANE	GOCC_LEADING_EDGE_MEMBRANE		121	-0.560745	-2.11968	0	5.12956e-05	0.011	2184	tags=40%, list=16%, signal=48%
GOBP_SYNAPTIC_TRANSMISSION_CHOLINERGIC	GOBP_SYNAPTIC_TRANSMISSION_CHOLINERGIC		16	-0.822627	-2.12012	0	5.14877e-05	0.011	956	tags=63%, list=7%, signal=67%
GOBP_SENSORY_PERCEPTION_OF_MECHANICAL_STIMULUS	GOBP_SENSORY_PERCEPTION_OF_MECHANICAL_STIMULUS		125	-0.551609	-2.12115	0	5.16813e-05	0.011	3455	tags=52%, list=25%, signal=69%
GOBP_CENTRAL_NERVOUS_SYSTEM_NEURON_DEVELOPMENT	GOBP_CENTRAL_NERVOUS_SYSTEM_NEURON_DEVELOPMENT		69	-0.598071	-2.1044	0	5.28083e-05	0.012	2775	tags=54%, list=20%, signal=67%
GOBP_FOREBRAIN_CELL_MIGRATION	GOBP_FOREBRAIN_CELL_MIGRATION		54	-0.618229	-2.10442	0	5.29955e-05	0.012	2755	tags=52%, list=20%, signal=65%
GOBP_HINDBRAIN_MORPHOGENESIS	GOBP_HINDBRAIN_MORPHOGENESIS		49	-0.638741	-2.10496	0	5.31841e-05	0.012	2916	tags=59%, list=21%, signal=75%
GOCC_MEMBRANE_MICRODOMAIN	GOCC_MEMBRANE_MICRODOMAIN		319	-0.493682	-2.10549	0	5.33741e-05	0.012	1553	tags=25%, list=11%, signal=27%
GOBP_REGULATION_OF_MICROTUBULE_DEPOLYMERIZATION	GOBP_REGULATION_OF_MICROTUBULE_DEPOLYMERIZATION		32	-0.691563	-2.1063	0	5.35654e-05	0.012	1063	tags=50%, list=8%, signal=54%
GOBP_REGULATION_OF_STRIATED_MUSCLE_CONTRACTION	GOBP_REGULATION_OF_STRIATED_MUSCLE_CONTRACTION		67	-0.611148	-2.10669	0	5.3758e-05	0.012	2967	tags=46%, list=22%, signal=59%
GOBP_DOPAMINE_TRANSPORT	GOBP_DOPAMINE_TRANSPORT		38	-0.663473	-2.1077	0	5.39521e-05	0.012	2442	tags=61%, list=18%, signal=74%
GOBP_CEREBELLAR_CORTEX_DEVELOPMENT	GOBP_CEREBELLAR_CORTEX_DEVELOPMENT		58	-0.622366	-2.10993	0	5.41476e-05	0.012	2916	tags=59%, list=21%, signal=74%
GOCC_SARCOPLASMIC_RETICULUM	GOCC_SARCOPLASMIC_RETICULUM		59	-0.605797	-2.11049	0	5.43445e-05	0.012	3633	tags=61%, list=27%, signal=83%
GOBP_REGULATION_OF_RHO_PROTEIN_SIGNAL_TRANSDUCTION	GOBP_REGULATION_OF_RHO_PROTEIN_SIGNAL_TRANSDUCTION		73	-0.5809	-2.10384	0	5.6579e-05	0.013	2823	tags=44%, list=21%, signal=55%
GOMF_SNARE_BINDING	GOMF_SNARE_BINDING		104	-0.562536	-2.1042	0	5.67776e-05	0.013	1783	tags=39%, list=13%, signal=45%
GOBP_REGULATION_OF_CALCIUM_ION_TRANSMEMBRANE_TRANSPORTER_ACTIVITY	GOBP_REGULATION_OF_CALCIUM_ION_TRANSMEMBRANE_TRANSPORTER_ACTIVITY		74	-0.586952	-2.10433	0	5.69775e-05	0.013	2577	tags=45%, list=19%, signal=55%
GOBP_REGULATION_OF_ENDOCYTOSIS	GOBP_REGULATION_OF_ENDOCYTOSIS		201	-0.512385	-2.10293	0	6.08873e-05	0.014	3391	tags=42%, list=25%, signal=55%
GOBP_REGULATION_OF_PROTEIN_CONTAINING_COMPLEX_DISASSEMBLY	GOBP_REGULATION_OF_PROTEIN_CONTAINING_COMPLEX_DISASSEMBLY		113	-0.561255	-2.09951	0	6.44716e-05	0.015	2199	tags=36%, list=16%, signal=43%
GOMF_GLUTAMATE_RECEPTOR_ACTIVITY	GOMF_GLUTAMATE_RECEPTOR_ACTIVITY		15	-0.840803	-2.10024	0	6.46947e-05	0.015	1156	tags=73%, list=9%, signal=80%
GOBP_CALCIUM_MEDIATED_SIGNALING	GOBP_CALCIUM_MEDIATED_SIGNALING		130	-0.541779	-2.10031	0	6.49193e-05	0.015	2968	tags=39%, list=22%, signal=50%
GOCC_BASEMENT_MEMBRANE	GOCC_BASEMENT_MEMBRANE		97	-0.565926	-2.0981	0	6.85706e-05	0.016	2681	tags=47%, list=20%, signal=59%
GOBP_REGULATION_OF_GTPASE_ACTIVITY	GOBP_REGULATION_OF_GTPASE_ACTIVITY		315	-0.488704	-2.09154	0	7.11677e-05	0.017	3741	tags=50%, list=28%, signal=67%
GOMF_SPECTRIN_BINDING	GOMF_SPECTRIN_BINDING		22	-0.757069	-2.09167	0	7.14073e-05	0.017	2233	tags=55%, list=16%, signal=65%
GOBP_CELLULAR_RESPONSE_TO_CALCIUM_ION	GOBP_CELLULAR_RESPONSE_TO_CALCIUM_ION		61	-0.60184	-2.09252	0	7.16486e-05	0.017	2465	tags=39%, list=18%, signal=48%
GOMF_TRANSMEMBRANE_RECEPTOR_PROTEIN_KINASE_ACTIVITY	GOMF_TRANSMEMBRANE_RECEPTOR_PROTEIN_KINASE_ACTIVITY		65	-0.607886	-2.09439	0	7.18914e-05	0.017	2138	tags=34%, list=16%, signal=40%
GOBP_RESPONSE_TO_DOPAMINE	GOBP_RESPONSE_TO_DOPAMINE		42	-0.653148	-2.09467	0	7.2136e-05	0.017	1669	tags=45%, list=12%, signal=51%
GOBP_ASSOCIATIVE_LEARNING	GOBP_ASSOCIATIVE_LEARNING		86	-0.568145	-2.09579	0	7.23822e-05	0.017	2275	tags=40%, list=17%, signal=47%
GOCC_INTEGRAL_COMPONENT_OF_PRESYNAPTIC_ACTIVE_ZONE_MEMBRANE	GOCC_INTEGRAL_COMPONENT_OF_PRESYNAPTIC_ACTIVE_ZONE_MEMBRANE		23	-0.742498	-2.097	0	7.26301e-05	0.017	1872	tags=61%, list=14%, signal=70%
GOBP_RHYTHMIC_BEHAVIOR	GOBP_RHYTHMIC_BEHAVIOR		42	-0.642924	-2.08989	0	7.4418e-05	0.018	2225	tags=43%, list=16%, signal=51%
GOBP_AXONAL_FASCICULATION	GOBP_AXONAL_FASCICULATION		22	-0.745995	-2.09003	0	7.46661e-05	0.018	2307	tags=55%, list=17%, signal=66%
GOBP_REGULATION_OF_CELL_SUBSTRATE_ADHESION	GOBP_REGULATION_OF_CELL_SUBSTRATE_ADHESION		189	-0.513554	-2.09047	0	7.49158e-05	0.018	3552	tags=46%, list=26%, signal=61%
GOBP_SMOOTH_MUSCLE_CONTRACTION	GOBP_SMOOTH_MUSCLE_CONTRACTION		95	-0.566271	-2.08851	0	7.83557e-05	0.019	3183	tags=54%, list=23%, signal=70%
GOBP_REGULATION_OF_PRESYNAPSE_ORGANIZATION	GOBP_REGULATION_OF_PRESYNAPSE_ORGANIZATION		29	-0.715063	-2.08758	0	8.1574e-05	0.02	1710	tags=52%, list=13%, signal=59%
GOBP_MONOAMINE_TRANSPORT	GOBP_MONOAMINE_TRANSPORT		72	-0.591091	-2.08765	0	8.18424e-05	0.02	2442	tags=49%, list=18%, signal=59%
GOCC_HIPPOCAMPAL_MOSSY_FIBER_TO_CA3_SYNAPSE	GOCC_HIPPOCAMPAL_MOSSY_FIBER_TO_CA3_SYNAPSE		36	-0.676364	-2.08778	0	8.21125e-05	0.02	2466	tags=61%, list=18%, signal=74%
GOBP_CARDIAC_CHAMBER_MORPHOGENESIS	GOBP_CARDIAC_CHAMBER_MORPHOGENESIS		112	-0.55358	-2.08508	0	8.88131e-05	0.022	2874	tags=42%, list=21%, signal=53%
GOBP_NEGATIVE_REGULATION_OF_NEURON_PROJECTION_DEVELOPMENT	GOBP_NEGATIVE_REGULATION_OF_NEURON_PROJECTION_DEVELOPMENT		144	-0.531013	-2.08515	0	8.91024e-05	0.022	2783	tags=39%, list=21%, signal=48%
GOBP_MEMBRANE_DEPOLARIZATION	GOBP_MEMBRANE_DEPOLARIZATION		67	-0.597195	-2.08566	0	8.93935e-05	0.022	2568	tags=45%, list=19%, signal=55%
GOBP_NEURON_PROJECTION_EXTENSION	GOBP_NEURON_PROJECTION_EXTENSION		169	-0.517681	-2.0804	0	9.09878e-05	0.023	2783	tags=45%, list=21%, signal=56%
GOMF_ACTININ_BINDING	GOMF_ACTININ_BINDING		31	-0.694527	-2.08121	0	9.12785e-05	0.023	1869	tags=42%, list=14%, signal=49%
GOCC_SECRETORY_VESICLE	GOCC_SECRETORY_VESICLE		410	-0.476132	-2.08156	0	9.1571e-05	0.023	1576	tags=27%, list=12%, signal=30%
GOBP_DENDRITIC_SPINE_MORPHOGENESIS	GOBP_DENDRITIC_SPINE_MORPHOGENESIS		66	-0.600776	-2.08278	0	9.18655e-05	0.023	1684	tags=32%, list=12%, signal=36%
GOMF_VOLTAGE_GATED_SODIUM_CHANNEL_ACTIVITY	GOMF_VOLTAGE_GATED_SODIUM_CHANNEL_ACTIVITY		18	-0.800508	-2.08333	0	9.21618e-05	0.023	2452	tags=89%, list=18%, signal=108%
GOBP_REGULATION_OF_MUSCLE_SYSTEM_PROCESS	GOBP_REGULATION_OF_MUSCLE_SYSTEM_PROCESS		198	-0.509502	-2.08377	0	9.24601e-05	0.023	2988	tags=41%, list=22%, signal=52%
GOBP_NEURON_PROJECTION_EXTENSION_INVOLVED_IN_NEURON_PROJECTION_GUIDANCE	GOBP_NEURON_PROJECTION_EXTENSION_INVOLVED_IN_NEURON_PROJECTION_GUIDANCE		35	-0.68198	-2.07961	0	9.40241e-05	0.024	2719	tags=54%, list=20%, signal=68%
GOBP_CARDIAC_SEPTUM_MORPHOGENESIS	GOBP_CARDIAC_SEPTUM_MORPHOGENESIS		66	-0.594735	-2.07976	0	9.43217e-05	0.024	2757	tags=47%, list=20%, signal=59%
GOBP_REGULATION_OF_NEURONAL_SYNAPTIC_PLASTICITY	GOBP_REGULATION_OF_NEURONAL_SYNAPTIC_PLASTICITY		53	-0.625859	-2.07994	0	9.46211e-05	0.024	2951	tags=58%, list=22%, signal=74%
GOBP_REGULATION_OF_RECEPTOR_MEDIATED_ENDOCYTOSIS	GOBP_REGULATION_OF_RECEPTOR_MEDIATED_ENDOCYTOSIS		106	-0.55133	-2.07909	0	9.76106e-05	0.025	3376	tags=49%, list=25%, signal=65%
GOCC_CELL_PROJECTION_MEMBRANE	GOCC_CELL_PROJECTION_MEMBRANE		247	-0.494426	-2.07621	0	0.00010059	0.026	2753	tags=35%, list=20%, signal=43%
GOBP_REGULATION_OF_VESICLE_MEDIATED_TRANSPORT	GOBP_REGULATION_OF_VESICLE_MEDIATED_TRANSPORT		493	-0.465758	-2.0771	0	0.000100904	0.026	2955	tags=36%, list=22%, signal=44%
GOMF_TRANSMEMBRANE_RECEPTOR_PROTEIN_TYROSINE_KINASE_ACTIVITY	GOMF_TRANSMEMBRANE_RECEPTOR_PROTEIN_TYROSINE_KINASE_ACTIVITY		51	-0.623986	-2.07842	0	0.00010122	0.026	2138	tags=35%, list=16%, signal=42%
GOCC_PROTEIN_COMPLEX_INVOLVED_IN_CELL_ADHESION	GOCC_PROTEIN_COMPLEX_INVOLVED_IN_CELL_ADHESION		46	-0.639964	-2.07349	0	0.000111673	0.029	1375	tags=28%, list=10%, signal=31%
GOMF_GLUTAMATE_RECEPTOR_BINDING	GOMF_GLUTAMATE_RECEPTOR_BINDING		55	-0.612333	-2.06702	0	0.000112403	0.03	2565	tags=53%, list=19%, signal=65%
GOBP_HEART_VALVE_MORPHOGENESIS	GOBP_HEART_VALVE_MORPHOGENESIS		40	-0.643342	-2.06792	0	0.000112744	0.03	2970	tags=55%, list=22%, signal=70%
GOBP_NEUROMUSCULAR_PROCESS_CONTROLLING_BALANCE	GOBP_NEUROMUSCULAR_PROCESS_CONTROLLING_BALANCE		52	-0.629005	-2.06907	0	0.000113087	0.03	2550	tags=54%, list=19%, signal=66%
GOBP_REGULATION_OF_SYNAPTIC_TRANSMISSION_GABAERGIC	GOBP_REGULATION_OF_SYNAPTIC_TRANSMISSION_GABAERGIC		32	-0.688222	-2.07017	0	0.000113431	0.03	1116	tags=44%, list=8%, signal=48%
GOBP_SKELETAL_SYSTEM_DEVELOPMENT	GOBP_SKELETAL_SYSTEM_DEVELOPMENT		423	-0.472691	-2.07028	0	0.000113778	0.03	4026	tags=49%, list=30%, signal=67%
GOBP_DETECTION_OF_MECHANICAL_STIMULUS_INVOLVED_IN_SENSORY_PERCEPTION	GOBP_DETECTION_OF_MECHANICAL_STIMULUS_INVOLVED_IN_SENSORY_PERCEPTION		32	-0.688787	-2.07145	0	0.000114127	0.03	1907	tags=44%, list=14%, signal=51%
GOBP_REGULATION_OF_POTASSIUM_ION_TRANSMEMBRANE_TRANSPORTER_ACTIVITY	GOBP_REGULATION_OF_POTASSIUM_ION_TRANSMEMBRANE_TRANSPORTER_ACTIVITY		49	-0.631815	-2.07153	0	0.000114478	0.03	2933	tags=57%, list=22%, signal=73%
GOCC_AXONAL_GROWTH_CONE	GOCC_AXONAL_GROWTH_CONE		37	-0.666989	-2.07227	0	0.000114832	0.03	2075	tags=54%, list=15%, signal=64%
GOBP_HEART_MORPHOGENESIS	GOBP_HEART_MORPHOGENESIS		208	-0.50437	-2.07275	0	0.000115187	0.03	3331	tags=44%, list=25%, signal=57%
GOBP_NEGATIVE_REGULATION_OF_ION_TRANSPORT	GOBP_NEGATIVE_REGULATION_OF_ION_TRANSPORT		142	-0.534962	-2.06667	0	0.000115888	0.031	2573	tags=39%, list=19%, signal=47%
GOBP_POSITIVE_REGULATION_OF_SODIUM_ION_TRANSPORT	GOBP_POSITIVE_REGULATION_OF_SODIUM_ION_TRANSPORT		39	-0.651944	-2.06568	0	0.000119179	0.032	2967	tags=51%, list=22%, signal=65%
GOMF_EXCITATORY_EXTRACELLULAR_LIGAND_GATED_ION_CHANNEL_ACTIVITY	GOMF_EXCITATORY_EXTRACELLULAR_LIGAND_GATED_ION_CHANNEL_ACTIVITY		18	-0.786062	-2.06484	0	0.000122581	0.033	1223	tags=67%, list=9%, signal=73%
GOBP_NEGATIVE_REGULATION_OF_CELL_DEVELOPMENT	GOBP_NEGATIVE_REGULATION_OF_CELL_DEVELOPMENT		168	-0.516394	-2.06229	0	0.000124547	0.034	2783	tags=39%, list=21%, signal=49%
GOBP_POSITIVE_REGULATION_OF_TRANSPORTER_ACTIVITY	GOBP_POSITIVE_REGULATION_OF_TRANSPORTER_ACTIVITY		109	-0.551438	-2.06252	0	0.000124916	0.034	1873	tags=32%, list=14%, signal=37%
GOBP_POSITIVE_REGULATION_OF_CALCIUM_ION_DEPENDENT_EXOCYTOSIS	GOBP_POSITIVE_REGULATION_OF_CALCIUM_ION_DEPENDENT_EXOCYTOSIS		15	-0.808607	-2.0627	0	0.000125286	0.034	932	tags=60%, list=7%, signal=64%
GOBP_BASEMENT_MEMBRANE_ORGANIZATION	GOBP_BASEMENT_MEMBRANE_ORGANIZATION		33	-0.682717	-2.0627	0	0.000125659	0.034	1923	tags=42%, list=14%, signal=49%
GOBP_PROTEIN_DEPOLYMERIZATION	GOBP_PROTEIN_DEPOLYMERIZATION		107	-0.548528	-2.06317	0	0.000126034	0.034	2199	tags=42%, list=16%, signal=50%
GOBP_REGULATION_OF_LONG_TERM_SYNAPTIC_POTENTIATION	GOBP_REGULATION_OF_LONG_TERM_SYNAPTIC_POTENTIATION		48	-0.621764	-2.06009	0	0.000134411	0.037	2977	tags=56%, list=22%, signal=72%
GOBP_CYCLIC_NUCLEOTIDE_MEDIATED_SIGNALING	GOBP_CYCLIC_NUCLEOTIDE_MEDIATED_SIGNALING		64	-0.588102	-2.06031	0	0.000134805	0.037	2711	tags=48%, list=20%, signal=60%
GOBP_CELLULAR_COMPONENT_ASSEMBLY_INVOLVED_IN_MORPHOGENESIS	GOBP_CELLULAR_COMPONENT_ASSEMBLY_INVOLVED_IN_MORPHOGENESIS		85	-0.564126	-2.06136	0	0.000135201	0.037	2741	tags=45%, list=20%, signal=56%
GOMF_ALPHA_ACTININ_BINDING	GOMF_ALPHA_ACTININ_BINDING		23	-0.745631	-2.05853	0	0.00014086	0.039	3353	tags=74%, list=25%, signal=98%
GOCC_SARCOMERE	GOCC_SARCOMERE		141	-0.522152	-2.05892	0	0.000141271	0.039	3103	tags=50%, list=23%, signal=64%
GOCC_AXON_INITIAL_SEGMENT	GOCC_AXON_INITIAL_SEGMENT		21	-0.745724	-2.05703	0	0.000147513	0.041	2225	tags=76%, list=16%, signal=91%
GOBP_CEREBELLAR_CORTEX_FORMATION	GOBP_CEREBELLAR_CORTEX_FORMATION		27	-0.713243	-2.05569	0	0.000154277	0.043	2550	tags=63%, list=19%, signal=77%
GOBP_REGULATION_OF_CELL_MORPHOGENESIS	GOBP_REGULATION_OF_CELL_MORPHOGENESIS		288	-0.484768	-2.0555	0	0.000157478	0.044	3251	tags=40%, list=24%, signal=51%
GOBP_REGULATION_OF_CARDIAC_MUSCLE_CONTRACTION	GOBP_REGULATION_OF_CARDIAC_MUSCLE_CONTRACTION		59	-0.601144	-2.05322	0	0.000170174	0.048	2967	tags=46%, list=22%, signal=58%
GOCC_ACTOMYOSIN	GOCC_ACTOMYOSIN		84	-0.565893	-2.05351	0	0.000170661	0.048	3163	tags=54%, list=23%, signal=69%
GOCC_DYSTROPHIN_ASSOCIATED_GLYCOPROTEIN_COMPLEX	GOCC_DYSTROPHIN_ASSOCIATED_GLYCOPROTEIN_COMPLEX		17	-0.788996	-2.05416	0	0.000171152	0.048	1913	tags=76%, list=14%, signal=89%
GOBP_NEGATIVE_REGULATION_OF_AXON_EXTENSION	GOBP_NEGATIVE_REGULATION_OF_AXON_EXTENSION		42	-0.627324	-2.05241	0	0.00017273	0.049	3534	tags=50%, list=26%, signal=67%
GOBP_SYNAPTIC_VESICLE_CLUSTERING	GOBP_SYNAPTIC_VESICLE_CLUSTERING		18	-0.770286	-2.05251	0	0.000173222	0.049	1865	tags=72%, list=14%, signal=84%
GOBP_NEGATIVE_REGULATION_OF_CELL_PROJECTION_ORGANIZATION	GOBP_NEGATIVE_REGULATION_OF_CELL_PROJECTION_ORGANIZATION		189	-0.506938	-2.05168	0	0.000175768	0.05	2995	tags=41%, list=22%, signal=52%
GOCC_GLYCOPROTEIN_COMPLEX	GOCC_GLYCOPROTEIN_COMPLEX		19	-0.775	-2.05157	0	0.000178249	0.051	1913	tags=74%, list=14%, signal=86%
GOCC_AXOLEMMA	GOCC_AXOLEMMA		17	-0.801177	-2.05164	0	0.000178753	0.051	2184	tags=71%, list=16%, signal=84%
GOBP_DIVALENT_INORGANIC_CATION_HOMEOSTASIS	GOBP_DIVALENT_INORGANIC_CATION_HOMEOSTASIS		258	-0.486896	-2.04946	0	0.000180711	0.052	2274	tags=28%, list=17%, signal=32%
GOCC_TRANSPORT_VESICLE_MEMBRANE	GOCC_TRANSPORT_VESICLE_MEMBRANE		128	-0.531152	-2.04972	0	0.000181219	0.052	2957	tags=49%, list=22%, signal=62%
GOBP_UROGENITAL_SYSTEM_DEVELOPMENT	GOBP_UROGENITAL_SYSTEM_DEVELOPMENT		303	-0.477772	-2.04782	0	0.000182279	0.052	2971	tags=35%, list=22%, signal=44%
GOBP_BIOLOGICAL_PROCESS_INVOLVED_IN_INTRASPECIES_INTERACTION_BETWEEN_ORGANISMS	GOBP_BIOLOGICAL_PROCESS_INVOLVED_IN_INTRASPECIES_INTERACTION_BETWEEN_ORGANISMS		48	-0.632129	-2.04829	0	0.000182786	0.052	3463	tags=65%, list=26%, signal=86%
GOBP_CEREBELLAR_CORTEX_MORPHOGENESIS	GOBP_CEREBELLAR_CORTEX_MORPHOGENESIS		38	-0.657545	-2.04848	0	0.000183295	0.052	2916	tags=66%, list=21%, signal=84%
GOCC_PARALLEL_FIBER_TO_PURKINJE_CELL_SYNAPSE	GOCC_PARALLEL_FIBER_TO_PURKINJE_CELL_SYNAPSE		22	-0.737768	-2.04911	0	0.000183807	0.052	1697	tags=59%, list=13%, signal=67%
GOBP_CELLULAR_COMPONENT_MAINTENANCE	GOBP_CELLULAR_COMPONENT_MAINTENANCE		59	-0.58857	-2.04576	0	0.000187076	0.054	1897	tags=32%, list=14%, signal=37%
GOBP_POSITIVE_REGULATION_OF_CELL_JUNCTION_ASSEMBLY	GOBP_POSITIVE_REGULATION_OF_CELL_JUNCTION_ASSEMBLY		91	-0.559054	-2.04585	0	0.00018759	0.054	3552	tags=51%, list=26%, signal=68%
GOBP_VASCULAR_ASSOCIATED_SMOOTH_MUSCLE_CELL_MIGRATION	GOBP_VASCULAR_ASSOCIATED_SMOOTH_MUSCLE_CELL_MIGRATION		33	-0.677479	-2.04626	0	0.000188107	0.054	1039	tags=33%, list=8%, signal=36%
GOBP_ADENYLATE_CYCLASE_INHIBITING_G_PROTEIN_COUPLED_RECEPTOR_SIGNALING_PATHWAY	GOBP_ADENYLATE_CYCLASE_INHIBITING_G_PROTEIN_COUPLED_RECEPTOR_SIGNALING_PATHWAY		38	-0.651381	-2.04667	0	0.000188627	0.054	2104	tags=53%, list=16%, signal=62%
GOBP_RECEPTOR_INTERNALIZATION	GOBP_RECEPTOR_INTERNALIZATION		113	-0.54282	-2.04445	0	0.000189982	0.055	2848	tags=42%, list=21%, signal=52%
GOCC_LAMELLIPODIUM	GOCC_LAMELLIPODIUM		159	-0.508833	-2.04249	0	0.000196251	0.057	2979	tags=42%, list=22%, signal=53%
GOBP_OUTFLOW_TRACT_MORPHOGENESIS	GOBP_OUTFLOW_TRACT_MORPHOGENESIS		70	-0.566379	-2.04143	0	0.000198546	0.058	3331	tags=51%, list=25%, signal=68%
GOBP_DEVELOPMENTAL_CELL_GROWTH	GOBP_DEVELOPMENTAL_CELL_GROWTH		226	-0.496174	-2.04208	0	0.000199085	0.058	3668	tags=54%, list=27%, signal=72%
GOBP_CENTRAL_NERVOUS_SYSTEM_NEURON_AXONOGENESIS	GOBP_CENTRAL_NERVOUS_SYSTEM_NEURON_AXONOGENESIS		39	-0.649455	-2.04102	0	0.000201422	0.059	2755	tags=59%, list=20%, signal=74%
GOBP_CELL_MIGRATION_IN_HINDBRAIN	GOBP_CELL_MIGRATION_IN_HINDBRAIN		20	-0.743224	-2.03784	0	0.000217653	0.064	2262	tags=65%, list=17%, signal=78%
GOBP_OUTFLOW_TRACT_SEPTUM_MORPHOGENESIS	GOBP_OUTFLOW_TRACT_SEPTUM_MORPHOGENESIS		23	-0.721449	-2.03716	0.00190476	0.00021864	0.065	2577	tags=65%, list=19%, signal=80%
GOBP_EXPORT_ACROSS_PLASMA_MEMBRANE	GOBP_EXPORT_ACROSS_PLASMA_MEMBRANE		47	-0.62127	-2.03736	0	0.000219225	0.065	2225	tags=40%, list=16%, signal=48%
GOBP_CELL_CELL_SIGNALING_INVOLVED_IN_CARDIAC_CONDUCTION	GOBP_CELL_CELL_SIGNALING_INVOLVED_IN_CARDIAC_CONDUCTION		23	-0.727132	-2.03741	0	0.000219812	0.065	1109	tags=43%, list=8%, signal=47%
GOBP_NEUROMUSCULAR_JUNCTION_DEVELOPMENT	GOBP_NEUROMUSCULAR_JUNCTION_DEVELOPMENT		51	-0.619213	-2.03374	0	0.000220222	0.066	3050	tags=67%, list=22%, signal=86%
GOBP_TRANSMEMBRANE_RECEPTOR_PROTEIN_TYROSINE_KINASE_SIGNALING_PATHWAY	GOBP_TRANSMEMBRANE_RECEPTOR_PROTEIN_TYROSINE_KINASE_SIGNALING_PATHWAY		500	-0.458935	-2.03746	0	0.000220403	0.065	3495	tags=41%, list=26%, signal=54%
GOCC_CYTOPLASMIC_REGION	GOCC_CYTOPLASMIC_REGION		132	-0.523617	-2.03402	0	0.000220806	0.066	2621	tags=37%, list=19%, signal=46%
GOBP_NEURON_MATURATION	GOBP_NEURON_MATURATION		49	-0.614189	-2.03435	0	0.000221393	0.066	2969	tags=51%, list=22%, signal=65%
GOBP_REGULATION_OF_DENDRITE_DEVELOPMENT	GOBP_REGULATION_OF_DENDRITE_DEVELOPMENT		117	-0.532337	-2.03293	0	0.000225522	0.068	3034	tags=46%, list=22%, signal=59%
GOBP_VESICLE_FUSION_TO_PLASMA_MEMBRANE	GOBP_VESICLE_FUSION_TO_PLASMA_MEMBRANE		22	-0.717049	-2.03311	0	0.000226117	0.068	2904	tags=64%, list=21%, signal=81%
GOBP_AXONAL_TRANSPORT	GOBP_AXONAL_TRANSPORT		62	-0.594444	-2.03031	0	0.000231306	0.07	2924	tags=53%, list=22%, signal=68%
GOBP_TAXIS	GOBP_TAXIS		450	-0.45809	-2.02857	0	0.000233913	0.071	3014	tags=34%, list=22%, signal=43%
GOBP_CELLULAR_RESPONSE_TO_INORGANIC_SUBSTANCE	GOBP_CELLULAR_RESPONSE_TO_INORGANIC_SUBSTANCE		147	-0.524816	-2.02548	0	0.000242846	0.074	2711	tags=34%, list=20%, signal=42%
GOMF_DELAYED_RECTIFIER_POTASSIUM_CHANNEL_ACTIVITY	GOMF_DELAYED_RECTIFIER_POTASSIUM_CHANNEL_ACTIVITY		20	-0.752591	-2.02335	0	0.000248711	0.076	2225	tags=80%, list=16%, signal=96%
GOBP_POSTSYNAPSE_ASSEMBLY	GOBP_POSTSYNAPSE_ASSEMBLY		28	-0.7016	-2.02211	0	0.0002513	0.077	3397	tags=82%, list=25%, signal=109%
GOCC_PERIKARYON	GOCC_PERIKARYON		103	-0.5414	-2.02171	0	0.000253988	0.077	1675	tags=34%, list=12%, signal=38%
GOBP_NEGATIVE_CHEMOTAXIS	GOBP_NEGATIVE_CHEMOTAXIS		40	-0.642093	-2.01751	0	0.000269494	0.082	2995	tags=48%, list=22%, signal=61%
GOBP_NEUROTRANSMITTER_RECEPTOR_LOCALIZATION_TO_POSTSYNAPTIC_SPECIALIZATION_MEMBRANE	GOBP_NEUROTRANSMITTER_RECEPTOR_LOCALIZATION_TO_POSTSYNAPTIC_SPECIALIZATION_MEMBRANE		25	-0.712172	-2.01798	0	0.000270185	0.082	3163	tags=68%, list=23%, signal=89%
GOBP_EXOCYTIC_PROCESS	GOBP_EXOCYTIC_PROCESS		86	-0.562104	-2.01874	0	0.000270879	0.082	1595	tags=34%, list=12%, signal=38%
GOBP_REGULATION_OF_ACTIN_FILAMENT_BASED_MOVEMENT	GOBP_REGULATION_OF_ACTIN_FILAMENT_BASED_MOVEMENT		41	-0.63575	-2.01952	0	0.000271577	0.082	3114	tags=56%, list=23%, signal=73%
GOBP_NEGATIVE_REGULATION_OF_CELL_SUBSTRATE_ADHESION	GOBP_NEGATIVE_REGULATION_OF_CELL_SUBSTRATE_ADHESION		51	-0.606622	-2.01973	0	0.000272279	0.082	3643	tags=57%, list=27%, signal=77%
GOBP_TELENCEPHALON_DEVELOPMENT	GOBP_TELENCEPHALON_DEVELOPMENT		194	-0.494433	-2.01525	0	0.00027619	0.085	2781	tags=40%, list=20%, signal=50%
GOBP_CELL_COMMUNICATION_INVOLVED_IN_CARDIAC_CONDUCTION	GOBP_CELL_COMMUNICATION_INVOLVED_IN_CARDIAC_CONDUCTION		34	-0.661697	-2.01548	0	0.000276891	0.085	2308	tags=44%, list=17%, signal=53%
GOBP_POSITIVE_REGULATION_OF_NOTCH_SIGNALING_PATHWAY	GOBP_POSITIVE_REGULATION_OF_NOTCH_SIGNALING_PATHWAY		33	-0.649532	-2.01579	0	0.000277595	0.085	1024	tags=30%, list=8%, signal=33%
GOBP_REGULATION_OF_HEART_RATE_BY_CARDIAC_CONDUCTION	GOBP_REGULATION_OF_HEART_RATE_BY_CARDIAC_CONDUCTION		34	-0.668756	-2.01375	0	0.000277948	0.086	2452	tags=50%, list=18%, signal=61%
GOBP_ESTABLISHMENT_OF_MITOCHONDRION_LOCALIZATION	GOBP_ESTABLISHMENT_OF_MITOCHONDRION_LOCALIZATION		24	-0.71374	-2.01615	0	0.000278304	0.085	2400	tags=54%, list=18%, signal=66%
GOMF_G_PROTEIN_ALPHA_SUBUNIT_BINDING	GOMF_G_PROTEIN_ALPHA_SUBUNIT_BINDING		28	-0.688531	-2.01417	0	0.00027865	0.086	2274	tags=43%, list=17%, signal=51%
GOBP_HEART_VALVE_DEVELOPMENT	GOBP_HEART_VALVE_DEVELOPMENT		49	-0.611996	-2.01215	0	0.000281313	0.088	3331	tags=51%, list=25%, signal=67%
GOBP_REGULATION_OF_CELL_SUBSTRATE_JUNCTION_ORGANIZATION	GOBP_REGULATION_OF_CELL_SUBSTRATE_JUNCTION_ORGANIZATION		62	-0.584731	-2.01223	0	0.000282016	0.088	2419	tags=44%, list=18%, signal=53%
GOBP_BODY_MORPHOGENESIS	GOBP_BODY_MORPHOGENESIS		51	-0.606786	-2.01251	0	0.000282723	0.088	3495	tags=55%, list=26%, signal=74%
GOBP_MUSCLE_CELL_DEVELOPMENT	GOBP_MUSCLE_CELL_DEVELOPMENT		160	-0.513606	-2.01315	0	0.000283433	0.088	2959	tags=47%, list=22%, signal=59%
GOBP_POSITIVE_REGULATION_OF_CYTOSOLIC_CALCIUM_ION_CONCENTRATION	GOBP_POSITIVE_REGULATION_OF_CYTOSOLIC_CALCIUM_ION_CONCENTRATION		142	-0.515771	-2.01003	0	0.000289879	0.09	3003	tags=42%, list=22%, signal=53%
GOBP_NEGATIVE_REGULATION_OF_VASCULATURE_DEVELOPMENT	GOBP_NEGATIVE_REGULATION_OF_VASCULATURE_DEVELOPMENT		87	-0.542819	-2.00886	0	0.000292235	0.091	4079	tags=55%, list=30%, signal=78%
GOCC_CORTICAL_CYTOSKELETON	GOCC_CORTICAL_CYTOSKELETON		100	-0.535387	-2.00653	0	0.000312963	0.098	1868	tags=30%, list=14%, signal=35%
GOBP_BONE_MORPHOGENESIS	GOBP_BONE_MORPHOGENESIS		82	-0.559153	-2.00546	0	0.000315293	0.099	3481	tags=56%, list=26%, signal=75%
GOBP_ARTERY_DEVELOPMENT	GOBP_ARTERY_DEVELOPMENT		94	-0.543663	-2.00502	0	0.000317632	0.099	3732	tags=50%, list=28%, signal=68%
GOBP_REGULATION_OF_VESICLE_FUSION	GOBP_REGULATION_OF_VESICLE_FUSION		24	-0.704112	-2.00392	0	0.000322127	0.101	2950	tags=58%, list=22%, signal=74%
GOBP_SKELETAL_SYSTEM_MORPHOGENESIS	GOBP_SKELETAL_SYSTEM_MORPHOGENESIS		190	-0.498611	-2.00443	0	0.000322918	0.101	3871	tags=52%, list=29%, signal=71%
GOBP_ENDOCARDIAL_CUSHION_DEVELOPMENT	GOBP_ENDOCARDIAL_CUSHION_DEVELOPMENT		44	-0.617571	-2.00277	0	0.000325046	0.103	3331	tags=50%, list=25%, signal=66%
GOBP_POSITIVE_REGULATION_OF_OSSIFICATION	GOBP_POSITIVE_REGULATION_OF_OSSIFICATION		48	-0.608116	-2.00309	0	0.000325837	0.103	3481	tags=58%, list=26%, signal=78%
GOBP_AXO_DENDRITIC_TRANSPORT	GOBP_AXO_DENDRITIC_TRANSPORT		79	-0.560193	-2.00339	0	0.000326631	0.103	2924	tags=47%, list=22%, signal=59%
GOBP_POSTSYNAPTIC_SPECIALIZATION_ASSEMBLY	GOBP_POSTSYNAPTIC_SPECIALIZATION_ASSEMBLY		24	-0.701315	-2.00256	0	0.000327231	0.104	3397	tags=88%, list=25%, signal=117%
GOBP_DOPAMINE_RECEPTOR_SIGNALING_PATHWAY	GOBP_DOPAMINE_RECEPTOR_SIGNALING_PATHWAY		31	-0.674167	-2.00356	0	0.00032743	0.103	1563	tags=48%, list=12%, signal=55%
GOCC_INTERCALATED_DISC	GOCC_INTERCALATED_DISC		56	-0.600886	-2.00212	0	0.000329377	0.104	1717	tags=32%, list=13%, signal=37%
GOBP_NEUROPEPTIDE_SIGNALING_PATHWAY	GOBP_NEUROPEPTIDE_SIGNALING_PATHWAY		32	-0.666975	-2.00167	0	0.000337543	0.107	2182	tags=56%, list=16%, signal=67%
GOBP_ANTEROGRADE_AXONAL_TRANSPORT	GOBP_ANTEROGRADE_AXONAL_TRANSPORT		48	-0.609346	-1.99914	0	0.000338629	0.109	1626	tags=42%, list=12%, signal=47%
GOBP_REGULATION_OF_CELLULAR_RESPONSE_TO_GROWTH_FACTOR_STIMULUS	GOBP_REGULATION_OF_CELLULAR_RESPONSE_TO_GROWTH_FACTOR_STIMULUS		261	-0.475819	-1.99973	0	0.000339436	0.109	3309	tags=40%, list=24%, signal=52%
GOBP_POSITIVE_REGULATION_OF_CATION_CHANNEL_ACTIVITY	GOBP_POSITIVE_REGULATION_OF_CATION_CHANNEL_ACTIVITY		67	-0.570921	-2.00124	0	0.000339748	0.108	1856	tags=31%, list=14%, signal=36%
GOBP_POSTSYNAPTIC_SPECIALIZATION_ORGANIZATION	GOBP_POSTSYNAPTIC_SPECIALIZATION_ORGANIZATION		39	-0.640487	-1.99976	0	0.000340246	0.109	2352	tags=54%, list=17%, signal=65%
GOBP_RETROGRADE_AXONAL_TRANSPORT	GOBP_RETROGRADE_AXONAL_TRANSPORT		23	-0.698329	-2.00057	0	0.00034106	0.109	2855	tags=70%, list=21%, signal=88%
GOCC_SYNAPTIC_CLEFT	GOCC_SYNAPTIC_CLEFT		15	-0.809184	-2.00123	0	0.000341878	0.109	2295	tags=80%, list=17%, signal=96%
GOBP_REGULATION_OF_CARDIAC_MUSCLE_CELL_CONTRACTION	GOBP_REGULATION_OF_CARDIAC_MUSCLE_CELL_CONTRACTION		35	-0.649263	-1.9982	0	0.000349386	0.113	2967	tags=54%, list=22%, signal=69%
GOBP_CARDIAC_MUSCLE_CELL_ACTION_POTENTIAL_INVOLVED_IN_CONTRACTION	GOBP_CARDIAC_MUSCLE_CELL_ACTION_POTENTIAL_INVOLVED_IN_CONTRACTION		35	-0.657446	-1.99755	0	0.000351447	0.114	2452	tags=46%, list=18%, signal=56%
GOBP_REGULATION_OF_CELL_MATRIX_ADHESION	GOBP_REGULATION_OF_CELL_MATRIX_ADHESION		106	-0.533342	-1.99669	0	0.000359428	0.117	2711	tags=36%, list=20%, signal=44%
GOMF_NUCLEOSIDE_TRIPHOSPHATASE_REGULATOR_ACTIVITY	GOMF_NUCLEOSIDE_TRIPHOSPHATASE_REGULATOR_ACTIVITY		390	-0.457173	-1.9951	0	0.000364385	0.118	3310	tags=45%, list=24%, signal=58%
GOBP_HIPPO_SIGNALING	GOBP_HIPPO_SIGNALING		35	-0.645386	-1.99452	0	0.000365604	0.119	2812	tags=37%, list=21%, signal=47%
GOBP_REGULATION_OF_AMPA_RECEPTOR_ACTIVITY	GOBP_REGULATION_OF_AMPA_RECEPTOR_ACTIVITY		18	-0.743646	-1.99475	0	0.000366462	0.119	2094	tags=61%, list=15%, signal=72%
GOBP_EXTRACELLULAR_MATRIX_ASSEMBLY	GOBP_EXTRACELLULAR_MATRIX_ASSEMBLY		43	-0.621679	-1.99448	0	0.000367655	0.12	3378	tags=56%, list=25%, signal=74%
GOBP_EMBRYONIC_APPENDAGE_MORPHOGENESIS	GOBP_EMBRYONIC_APPENDAGE_MORPHOGENESIS		106	-0.527453	-1.99223	0	0.00038688	0.127	3213	tags=42%, list=24%, signal=54%
GOBP_RESPONSE_TO_AMYLOID_BETA	GOBP_RESPONSE_TO_AMYLOID_BETA		33	-0.655898	-1.99138	0	0.000389946	0.129	1657	tags=39%, list=12%, signal=45%
GOBP_INOSITOL_LIPID_MEDIATED_SIGNALING	GOBP_INOSITOL_LIPID_MEDIATED_SIGNALING		136	-0.505293	-1.99166	0	0.00039085	0.129	3495	tags=47%, list=26%, signal=63%
GOBP_SENSORY_ORGAN_MORPHOGENESIS	GOBP_SENSORY_ORGAN_MORPHOGENESIS		217	-0.479868	-1.99178	0	0.000391759	0.129	3995	tags=49%, list=29%, signal=69%
GOBP_VOCALIZATION_BEHAVIOR	GOBP_VOCALIZATION_BEHAVIOR		17	-0.769798	-1.99059	0	0.000397519	0.132	1684	tags=59%, list=12%, signal=67%
GOMF_ION_GATED_CHANNEL_ACTIVITY	GOMF_ION_GATED_CHANNEL_ACTIVITY		27	-0.690615	-1.98944	0	0.000407982	0.135	2289	tags=44%, list=17%, signal=53%
GOBP_DEVELOPMENTAL_MATURATION	GOBP_DEVELOPMENTAL_MATURATION		245	-0.475757	-1.98889	0	0.000412728	0.137	3016	tags=41%, list=22%, signal=52%
GOBP_NEGATIVE_REGULATION_OF_CELL_MATRIX_ADHESION	GOBP_NEGATIVE_REGULATION_OF_CELL_MATRIX_ADHESION		32	-0.656238	-1.98729	0	0.000431673	0.143	1632	tags=38%, list=12%, signal=43%
GOBP_POSITIVE_REGULATION_OF_CALCIUM_ION_TRANSPORT	GOBP_POSITIVE_REGULATION_OF_CALCIUM_ION_TRANSPORT		111	-0.519451	-1.98692	0	0.000436445	0.145	1725	tags=27%, list=13%, signal=31%
GOCC_AMPA_GLUTAMATE_RECEPTOR_COMPLEX	GOCC_AMPA_GLUTAMATE_RECEPTOR_COMPLEX		19	-0.753459	-1.98637	0	0.000441187	0.146	2094	tags=63%, list=15%, signal=75%
GOBP_EMBRYONIC_SKELETAL_SYSTEM_DEVELOPMENT	GOBP_EMBRYONIC_SKELETAL_SYSTEM_DEVELOPMENT		109	-0.526978	-1.98447	0	0.000445792	0.148	3851	tags=48%, list=28%, signal=66%
GOBP_NEGATIVE_REGULATION_OF_TRANSPORT	GOBP_NEGATIVE_REGULATION_OF_TRANSPORT		398	-0.455505	-1.98278	0	0.000457906	0.153	2941	tags=36%, list=22%, signal=44%
GOBP_REGULATION_OF_NEUROGENESIS	GOBP_REGULATION_OF_NEUROGENESIS		376	-0.45701	-1.98352	0	0.000458947	0.153	3017	tags=38%, list=22%, signal=47%
GOBP_NEGATIVE_REGULATION_OF_POTASSIUM_ION_TRANSPORT	GOBP_NEGATIVE_REGULATION_OF_POTASSIUM_ION_TRANSPORT		31	-0.647493	-1.97883	0.0019305	0.000461807	0.157	2868	tags=61%, list=21%, signal=78%
GOMF_ATPASE_COUPLED_TRANSMEMBRANE_TRANSPORTER_ACTIVITY	GOMF_ATPASE_COUPLED_TRANSMEMBRANE_TRANSPORTER_ACTIVITY		76	-0.55133	-1.98234	0	0.000462465	0.155	1502	tags=29%, list=11%, signal=32%
GOBP_REGULATION_OF_LONG_TERM_NEURONAL_SYNAPTIC_PLASTICITY	GOBP_REGULATION_OF_LONG_TERM_NEURONAL_SYNAPTIC_PLASTICITY		28	-0.667579	-1.97883	0	0.000462841	0.157	2396	tags=57%, list=18%, signal=69%
GOCC_SMOOTH_ENDOPLASMIC_RETICULUM	GOCC_SMOOTH_ENDOPLASMIC_RETICULUM		32	-0.651156	-1.9794	0	0.000463878	0.157	867	tags=28%, list=6%, signal=30%
GOBP_EYE_MORPHOGENESIS	GOBP_EYE_MORPHOGENESIS		128	-0.515042	-1.9795	0	0.000464921	0.157	3553	tags=45%, list=26%, signal=61%
GOBP_SENSORY_ORGAN_DEVELOPMENT	GOBP_SENSORY_ORGAN_DEVELOPMENT		430	-0.448443	-1.97953	0	0.000465968	0.157	3233	tags=37%, list=24%, signal=46%
GOBP_AXON_ENSHEATHMENT_IN_CENTRAL_NERVOUS_SYSTEM	GOBP_AXON_ENSHEATHMENT_IN_CENTRAL_NERVOUS_SYSTEM		22	-0.709954	-1.97981	0	0.00046702	0.157	1632	tags=45%, list=12%, signal=52%
GOBP_POSITIVE_REGULATION_OF_VASCULAR_ASSOCIATED_SMOOTH_MUSCLE_CELL_MIGRATION	GOBP_POSITIVE_REGULATION_OF_VASCULAR_ASSOCIATED_SMOOTH_MUSCLE_CELL_MIGRATION		20	-0.729711	-1.97726	0	0.00047914	0.162	1017	tags=30%, list=7%, signal=32%
GOBP_REGULATION_OF_EXTENT_OF_CELL_GROWTH	GOBP_REGULATION_OF_EXTENT_OF_CELL_GROWTH		110	-0.519494	-1.97734	0	0.000480207	0.162	3045	tags=45%, list=22%, signal=58%
GOBP_REGULATION_OF_DEVELOPMENTAL_GROWTH	GOBP_REGULATION_OF_DEVELOPMENTAL_GROWTH		314	-0.45883	-1.97705	0	0.000486195	0.165	3111	tags=39%, list=23%, signal=50%
GOBP_MUSCLE_CELL_DIFFERENTIATION	GOBP_MUSCLE_CELL_DIFFERENTIATION		332	-0.460382	-1.97489	0	0.000501342	0.169	3672	tags=47%, list=27%, signal=63%
GOBP_PULMONARY_VALVE_DEVELOPMENT	GOBP_PULMONARY_VALVE_DEVELOPMENT		18	-0.738815	-1.9744	0.00182482	0.000505748	0.171	2742	tags=61%, list=20%, signal=76%
GOBP_REGULATION_OF_SODIUM_ION_TRANSMEMBRANE_TRANSPORT	GOBP_REGULATION_OF_SODIUM_ION_TRANSMEMBRANE_TRANSPORT		57	-0.584687	-1.97416	0	0.000507412	0.172	2967	tags=53%, list=22%, signal=67%
GOBP_NEURON_PROJECTION_REGENERATION	GOBP_NEURON_PROJECTION_REGENERATION		59	-0.584627	-1.97408	0	0.000509005	0.173	2755	tags=41%, list=20%, signal=51%
GOBP_MUSCLE_TISSUE_DEVELOPMENT	GOBP_MUSCLE_TISSUE_DEVELOPMENT		349	-0.456791	-1.9739	0	0.000510621	0.173	2959	tags=38%, list=22%, signal=47%
GOMF_CYCLIC_NUCLEOTIDE_PHOSPHODIESTERASE_ACTIVITY	GOMF_CYCLIC_NUCLEOTIDE_PHOSPHODIESTERASE_ACTIVITY		20	-0.730748	-1.97072	0	0.000530208	0.18	2454	tags=55%, list=18%, signal=67%
GOBP_POSITIVE_REGULATION_OF_MAPK_CASCADE	GOBP_POSITIVE_REGULATION_OF_MAPK_CASCADE		394	-0.449651	-1.97133	0	0.000530973	0.179	2711	tags=31%, list=20%, signal=38%
GOBP_NEGATIVE_REGULATION_OF_MICROTUBULE_POLYMERIZATION_OR_DEPOLYMERIZATION	GOBP_NEGATIVE_REGULATION_OF_MICROTUBULE_POLYMERIZATION_OR_DEPOLYMERIZATION		42	-0.615617	-1.97084	0	0.000531364	0.18	2633	tags=57%, list=19%, signal=71%
GOMF_G_PROTEIN_COUPLED_RECEPTOR_ACTIVITY	GOMF_G_PROTEIN_COUPLED_RECEPTOR_ACTIVITY		154	-0.500001	-1.97099	0	0.000532524	0.18	2501	tags=31%, list=18%, signal=37%
GOBP_CELL_JUNCTION_MAINTENANCE	GOBP_CELL_JUNCTION_MAINTENANCE		35	-0.635347	-1.96975	0.00188679	0.000539899	0.184	1897	tags=37%, list=14%, signal=43%
GOBP_SENSORY_SYSTEM_DEVELOPMENT	GOBP_SENSORY_SYSTEM_DEVELOPMENT		291	-0.464998	-1.96927	0	0.000541426	0.184	3553	tags=41%, list=26%, signal=54%
GOCC_POSTSYNAPTIC_DENSITY_INTRACELLULAR_COMPONENT	GOCC_POSTSYNAPTIC_DENSITY_INTRACELLULAR_COMPONENT		30	-0.666257	-1.9671	0	0.000560479	0.192	2922	tags=60%, list=22%, signal=76%
GOBP_EXCITATORY_SYNAPSE_ASSEMBLY	GOBP_EXCITATORY_SYNAPSE_ASSEMBLY		25	-0.686841	-1.96738	0	0.00056169	0.192	1806	tags=52%, list=13%, signal=60%
GOBP_POSITIVE_REGULATION_OF_SMALL_GTPASE_MEDIATED_SIGNAL_TRANSDUCTION	GOBP_POSITIVE_REGULATION_OF_SMALL_GTPASE_MEDIATED_SIGNAL_TRANSDUCTION		59	-0.57561	-1.9661	0	0.00056721	0.195	3284	tags=44%, list=24%, signal=58%
GOBP_CEREBRAL_CORTEX_CELL_MIGRATION	GOBP_CEREBRAL_CORTEX_CELL_MIGRATION		43	-0.623205	-1.96405	0	0.000597843	0.203	2755	tags=58%, list=20%, signal=73%
GOBP_REGULATION_OF_G_PROTEIN_COUPLED_RECEPTOR_SIGNALING_PATHWAY	GOBP_REGULATION_OF_G_PROTEIN_COUPLED_RECEPTOR_SIGNALING_PATHWAY		97	-0.525893	-1.96325	0	0.000607191	0.206	2608	tags=41%, list=19%, signal=51%
GOBP_COLLATERAL_SPROUTING	GOBP_COLLATERAL_SPROUTING		26	-0.670614	-1.9605	0	0.000638983	0.214	2848	tags=58%, list=21%, signal=73%
GOMF_INTEGRIN_BINDING	GOMF_INTEGRIN_BINDING		120	-0.514446	-1.96069	0	0.000640349	0.214	2971	tags=35%, list=22%, signal=44%
GOBP_DIACYLGLYCEROL_METABOLIC_PROCESS	GOBP_DIACYLGLYCEROL_METABOLIC_PROCESS		21	-0.724497	-1.95889	0	0.000645265	0.218	1762	tags=48%, list=13%, signal=55%
GOBP_REGULATION_OF_DENDRITE_MORPHOGENESIS	GOBP_REGULATION_OF_DENDRITE_MORPHOGENESIS		79	-0.535859	-1.95912	0	0.000646629	0.218	2977	tags=44%, list=22%, signal=56%
GOBP_AXON_EXTENSION	GOBP_AXON_EXTENSION		121	-0.519051	-1.95956	0	0.000646725	0.218	3060	tags=47%, list=23%, signal=60%
GOBP_ENSHEATHMENT_OF_NEURONS	GOBP_ENSHEATHMENT_OF_NEURONS		130	-0.509468	-1.9585	0	0.000647754	0.219	1903	tags=29%, list=14%, signal=34%
GOBP_ACID_SECRETION	GOBP_ACID_SECRETION		32	-0.655078	-1.95917	0	0.000647999	0.218	1737	tags=41%, list=13%, signal=46%
GOBP_CARDIAC_ATRIUM_DEVELOPMENT	GOBP_CARDIAC_ATRIUM_DEVELOPMENT		26	-0.682096	-1.95972	0	0.000648101	0.218	3331	tags=65%, list=25%, signal=86%
GOBP_HORMONE_TRANSPORT	GOBP_HORMONE_TRANSPORT		276	-0.464658	-1.95862	0	0.000649118	0.219	3084	tags=37%, list=23%, signal=46%
GOCC_CELL_SUBSTRATE_JUNCTION	GOCC_CELL_SUBSTRATE_JUNCTION		165	-0.490651	-1.95753	0	0.000652787	0.221	3514	tags=38%, list=26%, signal=51%
GOCC_RIBBON_SYNAPSE	GOCC_RIBBON_SYNAPSE		21	-0.724863	-1.95754	0.00189036	0.000654156	0.221	1858	tags=57%, list=14%, signal=66%
GOBP_CELLULAR_DIVALENT_INORGANIC_CATION_HOMEOSTASIS	GOBP_CELLULAR_DIVALENT_INORGANIC_CATION_HOMEOSTASIS		230	-0.47143	-1.95738	0	0.000656571	0.222	2234	tags=27%, list=16%, signal=32%
GOCC_CONTRACTILE_FIBER	GOCC_CONTRACTILE_FIBER		167	-0.492653	-1.95482	0	0.000680849	0.231	3114	tags=50%, list=23%, signal=64%
GOBP_CORONARY_VASCULATURE_DEVELOPMENT	GOBP_CORONARY_VASCULATURE_DEVELOPMENT		62	-0.57274	-1.95491	0	0.000682265	0.231	2896	tags=48%, list=21%, signal=61%
GOBP_SMALL_GTPASE_MEDIATED_SIGNAL_TRANSDUCTION	GOBP_SMALL_GTPASE_MEDIATED_SIGNAL_TRANSDUCTION		385	-0.448605	-1.9551	0	0.000683686	0.231	3427	tags=40%, list=25%, signal=52%
GOMF_NEUROPEPTIDE_BINDING	GOMF_NEUROPEPTIDE_BINDING		15	-0.774992	-1.95403	0	0.000694835	0.236	2371	tags=73%, list=17%, signal=89%
GOMF_CYCLIC_NUCLEOTIDE_BINDING	GOMF_CYCLIC_NUCLEOTIDE_BINDING		25	-0.674555	-1.95303	0	0.000711192	0.24	2430	tags=60%, list=18%, signal=73%
GOBP_REGULATION_OF_CELL_DEVELOPMENT	GOBP_REGULATION_OF_CELL_DEVELOPMENT		483	-0.442445	-1.9529	0	0.000714889	0.242	3017	tags=37%, list=22%, signal=45%
GOBP_COLLAGEN_FIBRIL_ORGANIZATION	GOBP_COLLAGEN_FIBRIL_ORGANIZATION		48	-0.600481	-1.95227	0	0.00072104	0.244	3724	tags=58%, list=27%, signal=80%
GOBP_REGULATION_OF_ADENYLATE_CYCLASE_ACTIVITY	GOBP_REGULATION_OF_ADENYLATE_CYCLASE_ACTIVITY		29	-0.654527	-1.95157	0	0.000724641	0.246	2713	tags=52%, list=20%, signal=65%
GOBP_REGULATION_OF_DENDRITIC_SPINE_MORPHOGENESIS	GOBP_REGULATION_OF_DENDRITIC_SPINE_MORPHOGENESIS		51	-0.592902	-1.9514	0	0.00072829	0.247	1684	tags=29%, list=12%, signal=33%
GOBP_NEGATIVE_REGULATION_OF_NERVOUS_SYSTEM_DEVELOPMENT	GOBP_NEGATIVE_REGULATION_OF_NERVOUS_SYSTEM_DEVELOPMENT		142	-0.504807	-1.95125	0	0.000729341	0.248	2783	tags=39%, list=21%, signal=48%
GOMF_SIGNALING_ADAPTOR_ACTIVITY	GOMF_SIGNALING_ADAPTOR_ACTIVITY		64	-0.570994	-1.95003	0	0.00075297	0.257	2670	tags=42%, list=20%, signal=52%
GOBP_NEGATIVE_REGULATION_OF_CALCIUM_ION_TRANSPORT	GOBP_NEGATIVE_REGULATION_OF_CALCIUM_ION_TRANSPORT		60	-0.567751	-1.94914	0	0.000761521	0.259	1948	tags=35%, list=14%, signal=41%
GOBP_POSITIVE_REGULATION_OF_NERVOUS_SYSTEM_PROCESS	GOBP_POSITIVE_REGULATION_OF_NERVOUS_SYSTEM_PROCESS		41	-0.617282	-1.94813	0	0.000771024	0.262	3842	tags=68%, list=28%, signal=95%
GOBP_REGULATION_OF_SHORT_TERM_NEURONAL_SYNAPTIC_PLASTICITY	GOBP_REGULATION_OF_SHORT_TERM_NEURONAL_SYNAPTIC_PLASTICITY		16	-0.751227	-1.94844	0	0.000772591	0.262	2094	tags=69%, list=15%, signal=81%
GOMF_CAMP_BINDING	GOMF_CAMP_BINDING		17	-0.753118	-1.94767	0	0.000776901	0.264	2430	tags=65%, list=18%, signal=79%
GOMF_GTPASE_ACTIVATOR_ACTIVITY	GOMF_GTPASE_ACTIVATOR_ACTIVITY		219	-0.47259	-1.94602	0	0.000785371	0.267	3539	tags=47%, list=26%, signal=63%
GOCC_ACTIN_FILAMENT_BUNDLE	GOCC_ACTIN_FILAMENT_BUNDLE		81	-0.535814	-1.94393	0	0.000828796	0.277	3163	tags=51%, list=23%, signal=66%
GOBP_OSSIFICATION	GOBP_OSSIFICATION		322	-0.453591	-1.94358	0	0.000832148	0.279	3334	tags=41%, list=25%, signal=53%
GOBP_NEGATIVE_REGULATION_OF_ENDOCYTOSIS	GOBP_NEGATIVE_REGULATION_OF_ENDOCYTOSIS		41	-0.606092	-1.94278	0	0.000842974	0.282	3102	tags=49%, list=23%, signal=63%
GOBP_POSITIVE_REGULATION_OF_SYNAPTIC_TRANSMISSION_GABAERGIC	GOBP_POSITIVE_REGULATION_OF_SYNAPTIC_TRANSMISSION_GABAERGIC		15	-0.773418	-1.9426	0	0.000843802	0.283	349	tags=47%, list=3%, signal=48%
GOBP_REGULATION_OF_PROTEIN_LOCALIZATION_TO_SYNAPSE	GOBP_REGULATION_OF_PROTEIN_LOCALIZATION_TO_SYNAPSE		22	-0.703221	-1.94213	0	0.000852727	0.288	3397	tags=77%, list=25%, signal=103%
GOBP_REGULATION_OF_POSTSYNAPTIC_NEUROTRANSMITTER_RECEPTOR_ACTIVITY	GOBP_REGULATION_OF_POSTSYNAPTIC_NEUROTRANSMITTER_RECEPTOR_ACTIVITY		16	-0.761249	-1.94217	0	0.000854433	0.288	2848	tags=75%, list=21%, signal=95%
GOBP_EMBRYONIC_MORPHOGENESIS	GOBP_EMBRYONIC_MORPHOGENESIS		491	-0.438284	-1.94075	0	0.00085502	0.289	3766	tags=42%, list=28%, signal=55%
GOBP_NEURAL_NUCLEUS_DEVELOPMENT	GOBP_NEURAL_NUCLEUS_DEVELOPMENT		18	-0.731229	-1.94146	0	0.000855936	0.289	2033	tags=61%, list=15%, signal=72%
GOBP_POSITIVE_REGULATION_OF_ERK1_AND_ERK2_CASCADE	GOBP_POSITIVE_REGULATION_OF_ERK1_AND_ERK2_CASCADE		157	-0.489053	-1.94085	0	0.00085672	0.289	2616	tags=38%, list=19%, signal=47%
GOBP_ANIMAL_ORGAN_MATURATION	GOBP_ANIMAL_ORGAN_MATURATION		26	-0.66679	-1.93954	0	0.000877924	0.293	2434	tags=62%, list=18%, signal=75%
GOCC_BASAL_PART_OF_CELL	GOCC_BASAL_PART_OF_CELL		211	-0.468591	-1.93943	0	0.00087866	0.293	1417	tags=18%, list=10%, signal=20%
GOBP_POSITIVE_REGULATION_OF_SYNAPTIC_TRANSMISSION_GLUTAMATERGIC	GOBP_POSITIVE_REGULATION_OF_SYNAPTIC_TRANSMISSION_GLUTAMATERGIC		28	-0.670535	-1.93869	0	0.000879466	0.293	1751	tags=50%, list=13%, signal=57%
GOBP_VENTRICULAR_SEPTUM_MORPHOGENESIS	GOBP_VENTRICULAR_SEPTUM_MORPHOGENESIS		43	-0.609714	-1.93763	0	0.000885012	0.295	3331	tags=56%, list=25%, signal=74%
GOBP_POSITIVE_REGULATION_OF_NEUROTRANSMITTER_SECRETION	GOBP_POSITIVE_REGULATION_OF_NEUROTRANSMITTER_SECRETION		17	-0.750225	-1.93699	0	0.000890575	0.297	1128	tags=47%, list=8%, signal=51%
GOBP_ENDOCHONDRAL_BONE_MORPHOGENESIS	GOBP_ENDOCHONDRAL_BONE_MORPHOGENESIS		54	-0.575444	-1.93652	0	0.000896061	0.299	3481	tags=57%, list=26%, signal=77%
GOBP_POST_EMBRYONIC_DEVELOPMENT	GOBP_POST_EMBRYONIC_DEVELOPMENT		93	-0.533145	-1.93622	0	0.000903996	0.302	3003	tags=43%, list=22%, signal=55%
GOBP_ATRIOVENTRICULAR_VALVE_DEVELOPMENT	GOBP_ATRIOVENTRICULAR_VALVE_DEVELOPMENT		22	-0.680605	-1.93528	0	0.000915602	0.308	2757	tags=55%, list=20%, signal=68%
GOBP_SEQUESTERING_OF_CALCIUM_ION	GOBP_SEQUESTERING_OF_CALCIUM_ION		84	-0.536814	-1.93537	0	0.000916797	0.307	2234	tags=32%, list=16%, signal=38%
GOBP_NEGATIVE_REGULATION_OF_AMINE_TRANSPORT	GOBP_NEGATIVE_REGULATION_OF_AMINE_TRANSPORT		23	-0.689484	-1.9353	0	0.000917387	0.308	2442	tags=48%, list=18%, signal=58%
GOMF_SYNTAXIN_1_BINDING	GOMF_SYNTAXIN_1_BINDING		23	-0.688119	-1.93427	0	0.000928197	0.312	1783	tags=65%, list=13%, signal=75%
GOBP_REGULATION_OF_CYTOSOLIC_CALCIUM_ION_CONCENTRATION	GOBP_REGULATION_OF_CYTOSOLIC_CALCIUM_ION_CONCENTRATION		39	-0.622321	-1.93353	0.0019305	0.000936021	0.315	2967	tags=49%, list=22%, signal=62%
GOBP_REGULATION_OF_DENDRITE_EXTENSION	GOBP_REGULATION_OF_DENDRITE_EXTENSION		22	-0.702828	-1.93281	0	0.000948508	0.32	2783	tags=73%, list=21%, signal=91%
GOBP_POSITIVE_REGULATION_OF_AXONOGENESIS	GOBP_POSITIVE_REGULATION_OF_AXONOGENESIS		89	-0.524623	-1.93275	0	0.000949055	0.321	2995	tags=51%, list=22%, signal=64%
GOBP_REGULATION_OF_NEURON_DIFFERENTIATION	GOBP_REGULATION_OF_NEURON_DIFFERENTIATION		174	-0.481548	-1.93241	0	0.000956811	0.325	3852	tags=49%, list=28%, signal=68%
GOCC_ACTIN_CYTOSKELETON	GOCC_ACTIN_CYTOSKELETON		396	-0.444516	-1.93093	0	0.000974092	0.331	3114	tags=37%, list=23%, signal=47%
GOBP_RECEPTOR_MEDIATED_ENDOCYTOSIS	GOBP_RECEPTOR_MEDIATED_ENDOCYTOSIS		221	-0.470485	-1.93047	0	0.000974598	0.332	2908	tags=35%, list=21%, signal=44%
GOBP_POSITIVE_REGULATION_OF_FIBROBLAST_MIGRATION	GOBP_POSITIVE_REGULATION_OF_FIBROBLAST_MIGRATION		21	-0.698839	-1.93018	0.00194175	0.000975132	0.333	3114	tags=62%, list=23%, signal=80%
GOMF_COLLAGEN_BINDING	GOMF_COLLAGEN_BINDING		58	-0.565437	-1.92976	0	0.0009804	0.334	4061	tags=59%, list=30%, signal=83%
GOBP_POSTSYNAPTIC_SIGNAL_TRANSDUCTION	GOBP_POSTSYNAPTIC_SIGNAL_TRANSDUCTION		38	-0.616433	-1.92932	0.00201613	0.000988039	0.336	994	tags=37%, list=7%, signal=40%
GOBP_PROSTATE_GLAND_MORPHOGENESIS	GOBP_PROSTATE_GLAND_MORPHOGENESIS		28	-0.649584	-1.92912	0	0.000993277	0.337	2577	tags=43%, list=19%, signal=53%
GOBP_NEGATIVE_REGULATION_OF_CELL_JUNCTION_ASSEMBLY	GOBP_NEGATIVE_REGULATION_OF_CELL_JUNCTION_ASSEMBLY		27	-0.654653	-1.92879	0.00188679	0.00100319	0.34	2520	tags=41%, list=19%, signal=50%
GOBP_CANONICAL_WNT_SIGNALING_PATHWAY	GOBP_CANONICAL_WNT_SIGNALING_PATHWAY		246	-0.457175	-1.92841	0	0.00101342	0.343	3715	tags=42%, list=27%, signal=57%
GOBP_RESPONSE_TO_CALCIUM_ION	GOBP_RESPONSE_TO_CALCIUM_ION		101	-0.518303	-1.92791	0	0.0010142	0.345	2465	tags=36%, list=18%, signal=43%
GOBP_EMBRYONIC_SKELETAL_SYSTEM_MORPHOGENESIS	GOBP_EMBRYONIC_SKELETAL_SYSTEM_MORPHOGENESIS		81	-0.53671	-1.92842	0	0.00101534	0.343	3851	tags=51%, list=28%, signal=70%
GOBP_NEGATIVE_REGULATION_OF_BLOOD_CIRCULATION	GOBP_NEGATIVE_REGULATION_OF_BLOOD_CIRCULATION		21	-0.70604	-1.92794	0	0.00101612	0.345	2234	tags=71%, list=16%, signal=85%
GOBP_REGULATION_OF_CARTILAGE_DEVELOPMENT	GOBP_REGULATION_OF_CARTILAGE_DEVELOPMENT		59	-0.563429	-1.92676	0.00190114	0.00103341	0.352	3334	tags=47%, list=25%, signal=63%
GOBP_NEGATIVE_REGULATION_OF_SUPRAMOLECULAR_FIBER_ORGANIZATION	GOBP_NEGATIVE_REGULATION_OF_SUPRAMOLECULAR_FIBER_ORGANIZATION		150	-0.491646	-1.92563	0	0.00105779	0.359	2184	tags=35%, list=16%, signal=42%
GOBP_POSITIVE_REGULATION_OF_CREB_TRANSCRIPTION_FACTOR_ACTIVITY	GOBP_POSITIVE_REGULATION_OF_CREB_TRANSCRIPTION_FACTOR_ACTIVITY		15	-0.758184	-1.92591	0	0.00105946	0.359	3136	tags=73%, list=23%, signal=95%
GOBP_REGULATION_OF_RECEPTOR_INTERNALIZATION	GOBP_REGULATION_OF_RECEPTOR_INTERNALIZATION		66	-0.544959	-1.92564	0	0.00105977	0.359	3363	tags=50%, list=25%, signal=66%
GOBP_IMPORT_ACROSS_PLASMA_MEMBRANE	GOBP_IMPORT_ACROSS_PLASMA_MEMBRANE		141	-0.496863	-1.92443	0	0.00106381	0.363	3092	tags=37%, list=23%, signal=47%
GOBP_POSITIVE_REGULATION_OF_NEUROGENESIS	GOBP_POSITIVE_REGULATION_OF_NEUROGENESIS		247	-0.464022	-1.9252	0	0.00106515	0.362	3017	tags=38%, list=22%, signal=49%
GOBP_INSULIN_SECRETION	GOBP_INSULIN_SECRETION		174	-0.478641	-1.9248	0	0.00106579	0.363	2465	tags=32%, list=18%, signal=39%
GOBP_STARTLE_RESPONSE	GOBP_STARTLE_RESPONSE		24	-0.683046	-1.92417	0	0.0010665	0.365	3498	tags=71%, list=26%, signal=95%
GOBP_REGULATION_OF_SIGNALING_RECEPTOR_ACTIVITY	GOBP_REGULATION_OF_SIGNALING_RECEPTOR_ACTIVITY		110	-0.507652	-1.92485	0	0.00106778	0.363	3397	tags=45%, list=25%, signal=60%
GOBP_NEGATIVE_REGULATION_OF_CELL_SUBSTRATE_JUNCTION_ORGANIZATION	GOBP_NEGATIVE_REGULATION_OF_CELL_SUBSTRATE_JUNCTION_ORGANIZATION		15	-0.78052	-1.92391	0	0.00107605	0.368	1632	tags=47%, list=12%, signal=53%
GOBP_STRIATED_MUSCLE_CELL_DIFFERENTIATION	GOBP_STRIATED_MUSCLE_CELL_DIFFERENTIATION		233	-0.464952	-1.92327	0	0.00108818	0.372	3721	tags=48%, list=27%, signal=65%
GOBP_SENSORY_PERCEPTION_OF_TEMPERATURE_STIMULUS	GOBP_SENSORY_PERCEPTION_OF_TEMPERATURE_STIMULUS		21	-0.69568	-1.92332	0	0.0010902	0.372	2052	tags=48%, list=15%, signal=56%
GOMF_SCAFFOLD_PROTEIN_BINDING	GOMF_SCAFFOLD_PROTEIN_BINDING		72	-0.542765	-1.92271	0	0.00109531	0.376	1797	tags=33%, list=13%, signal=38%
GOBP_CELL_PROJECTION_ASSEMBLY	GOBP_CELL_PROJECTION_ASSEMBLY		403	-0.438938	-1.92084	0	0.00111138	0.382	3837	tags=41%, list=28%, signal=55%
GOBP_NEGATIVE_REGULATION_OF_CYTOSOLIC_CALCIUM_ION_CONCENTRATION	GOBP_NEGATIVE_REGULATION_OF_CYTOSOLIC_CALCIUM_ION_CONCENTRATION		19	-0.712806	-1.92054	0	0.00111391	0.382	2573	tags=58%, list=19%, signal=71%
GOCC_POSTSYNAPTIC_SPECIALIZATION_INTRACELLULAR_COMPONENT	GOCC_POSTSYNAPTIC_SPECIALIZATION_INTRACELLULAR_COMPONENT		36	-0.629895	-1.91859	0	0.00115721	0.395	2922	tags=50%, list=22%, signal=64%
GOCC_APICAL_DENDRITE	GOCC_APICAL_DENDRITE		22	-0.698848	-1.91795	0	0.00116879	0.4	2350	tags=50%, list=17%, signal=60%
GOBP_ACTIN_FILAMENT_DEPOLYMERIZATION	GOBP_ACTIN_FILAMENT_DEPOLYMERIZATION		50	-0.570462	-1.91735	0	0.0011825	0.405	2184	tags=36%, list=16%, signal=43%
GOCC_PRESYNAPTIC_ACTIVE_ZONE_CYTOPLASMIC_COMPONENT	GOCC_PRESYNAPTIC_ACTIVE_ZONE_CYTOPLASMIC_COMPONENT		18	-0.712781	-1.91635	0	0.00119833	0.411	1858	tags=56%, list=14%, signal=64%
GOBP_PROTEIN_LOCALIZATION_TO_CELL_PERIPHERY	GOBP_PROTEIN_LOCALIZATION_TO_CELL_PERIPHERY		326	-0.44705	-1.915	0	0.00121431	0.416	2795	tags=33%, list=21%, signal=41%
GOCC_PRESYNAPTIC_CYTOSOL	GOCC_PRESYNAPTIC_CYTOSOL		22	-0.689642	-1.91465	0	0.00121432	0.416	2466	tags=59%, list=18%, signal=72%
GOMF_INTRACELLULAR_LIGAND_GATED_ION_CHANNEL_ACTIVITY	GOMF_INTRACELLULAR_LIGAND_GATED_ION_CHANNEL_ACTIVITY		20	-0.709684	-1.91429	0	0.00121659	0.418	1412	tags=40%, list=10%, signal=45%
GOBP_NEGATIVE_REGULATION_OF_CELL_ADHESION	GOBP_NEGATIVE_REGULATION_OF_CELL_ADHESION		245	-0.463043	-1.91368	0	0.00121886	0.419	3003	tags=33%, list=22%, signal=42%
GOBP_CYTOSKELETON_DEPENDENT_INTRACELLULAR_TRANSPORT	GOBP_CYTOSKELETON_DEPENDENT_INTRACELLULAR_TRANSPORT		176	-0.475515	-1.91185	0	0.00124122	0.424	3684	tags=45%, list=27%, signal=61%
GOBP_ENDOCARDIAL_CUSHION_FORMATION	GOBP_ENDOCARDIAL_CUSHION_FORMATION		27	-0.657093	-1.91129	0.00206186	0.00125681	0.426	3812	tags=56%, list=28%, signal=77%
GOBP_RESPONSE_TO_AUDITORY_STIMULUS	GOBP_RESPONSE_TO_AUDITORY_STIMULUS		17	-0.725775	-1.90974	0.00208333	0.00127677	0.431	2556	tags=59%, list=19%, signal=72%
GOBP_ACTOMYOSIN_STRUCTURE_ORGANIZATION	GOBP_ACTOMYOSIN_STRUCTURE_ORGANIZATION		171	-0.476012	-1.90982	0	0.00127684	0.431	3661	tags=46%, list=27%, signal=62%
GOBP_REGULATION_OF_ANATOMICAL_STRUCTURE_SIZE	GOBP_REGULATION_OF_ANATOMICAL_STRUCTURE_SIZE		441	-0.434573	-1.90816	0	0.00131647	0.442	3068	tags=35%, list=23%, signal=44%
GOBP_CELLULAR_RESPONSE_TO_VASCULAR_ENDOTHELIAL_GROWTH_FACTOR_STIMULUS	GOBP_CELLULAR_RESPONSE_TO_VASCULAR_ENDOTHELIAL_GROWTH_FACTOR_STIMULUS		53	-0.567032	-1.90781	0	0.00132076	0.445	2406	tags=40%, list=18%, signal=48%
GOBP_POTASSIUM_ION_IMPORT_ACROSS_PLASMA_MEMBRANE	GOBP_POTASSIUM_ION_IMPORT_ACROSS_PLASMA_MEMBRANE		30	-0.646195	-1.90696	0.00182815	0.00132929	0.448	2922	tags=50%, list=22%, signal=64%
GOBP_PHOTORECEPTOR_CELL_DIFFERENTIATION	GOBP_PHOTORECEPTOR_CELL_DIFFERENTIATION		48	-0.582436	-1.90715	0	0.00132944	0.448	3297	tags=52%, list=24%, signal=69%
GOBP_ORGANIC_HYDROXY_COMPOUND_TRANSPORT	GOBP_ORGANIC_HYDROXY_COMPOUND_TRANSPORT		201	-0.465557	-1.90581	0	0.00134207	0.452	3014	tags=34%, list=22%, signal=43%
GOBP_NEURAL_RETINA_DEVELOPMENT	GOBP_NEURAL_RETINA_DEVELOPMENT		49	-0.585683	-1.90582	0	0.00134445	0.452	2154	tags=39%, list=16%, signal=46%
GOBP_REGULATION_OF_WNT_SIGNALING_PATHWAY	GOBP_REGULATION_OF_WNT_SIGNALING_PATHWAY		266	-0.450694	-1.90604	0	0.00134462	0.451	3590	tags=40%, list=26%, signal=54%
GOBP_MOTOR_NEURON_AXON_GUIDANCE	GOBP_MOTOR_NEURON_AXON_GUIDANCE		30	-0.646948	-1.90458	0	0.00136163	0.458	1107	tags=33%, list=8%, signal=36%
GOBP_ENDOCRINE_HORMONE_SECRETION	GOBP_ENDOCRINE_HORMONE_SECRETION		47	-0.585352	-1.90328	0	0.00138028	0.467	3402	tags=45%, list=25%, signal=59%
GOBP_RECEPTOR_CLUSTERING	GOBP_RECEPTOR_CLUSTERING		64	-0.555699	-1.9034	0	0.00138056	0.466	2268	tags=42%, list=17%, signal=50%
GOBP_G_PROTEIN_COUPLED_RECEPTOR_SIGNALING_PATHWAY_COUPLED_TO_CYCLIC_NUCLEOTIDE_SECOND_MESSENGER	GOBP_G_PROTEIN_COUPLED_RECEPTOR_SIGNALING_PATHWAY_COUPLED_TO_CYCLIC_NUCLEOTIDE_SECOND_MESSENGER		15	-0.748418	-1.90349	0.00383877	0.00138082	0.466	1497	tags=47%, list=11%, signal=52%
GOBP_REGULATION_OF_VOLTAGE_GATED_CALCIUM_CHANNEL_ACTIVITY	GOBP_REGULATION_OF_VOLTAGE_GATED_CALCIUM_CHANNEL_ACTIVITY		33	-0.622524	-1.90351	0	0.00138107	0.466	3461	tags=67%, list=26%, signal=89%
GOBP_REGULATION_OF_RESPIRATORY_GASEOUS_EXCHANGE	GOBP_REGULATION_OF_RESPIRATORY_GASEOUS_EXCHANGE		19	-0.717331	-1.90269	0	0.00138866	0.47	2052	tags=63%, list=15%, signal=74%
GOBP_SEMAPHORIN_PLEXIN_SIGNALING_PATHWAY	GOBP_SEMAPHORIN_PLEXIN_SIGNALING_PATHWAY		45	-0.584017	-1.90154	0	0.00141424	0.481	3693	tags=60%, list=27%, signal=82%
GOBP_ARTERY_MORPHOGENESIS	GOBP_ARTERY_MORPHOGENESIS		64	-0.543584	-1.90165	0	0.00141671	0.481	3373	tags=44%, list=25%, signal=58%
GOBP_REGULATION_OF_SODIUM_ION_TRANSMEMBRANE_TRANSPORTER_ACTIVITY	GOBP_REGULATION_OF_SODIUM_ION_TRANSMEMBRANE_TRANSPORTER_ACTIVITY		48	-0.577979	-1.90078	0	0.00143974	0.487	2967	tags=50%, list=22%, signal=64%
GOBP_MORPHOGENESIS_OF_AN_EPITHELIUM	GOBP_MORPHOGENESIS_OF_AN_EPITHELIUM		478	-0.427059	-1.9005	0	0.00144545	0.49	3991	tags=44%, list=29%, signal=61%
GOMF_CELL_CELL_ADHESION_MEDIATOR_ACTIVITY	GOMF_CELL_CELL_ADHESION_MEDIATOR_ACTIVITY		26	-0.669555	-1.90058	0	0.00144582	0.489	1397	tags=46%, list=10%, signal=51%
GOBP_PALLIUM_DEVELOPMENT	GOBP_PALLIUM_DEVELOPMENT		124	-0.493241	-1.89972	0	0.0014602	0.495	2781	tags=40%, list=20%, signal=50%
GOMF_ANKYRIN_BINDING	GOMF_ANKYRIN_BINDING		16	-0.739248	-1.8995	0	0.00146191	0.496	315	tags=31%, list=2%, signal=32%
GOBP_WALKING_BEHAVIOR	GOBP_WALKING_BEHAVIOR		40	-0.595785	-1.89786	0	0.00149995	0.506	1935	tags=48%, list=14%, signal=55%
GOBP_REGULATION_OF_CANONICAL_WNT_SIGNALING_PATHWAY	GOBP_REGULATION_OF_CANONICAL_WNT_SIGNALING_PATHWAY		214	-0.460999	-1.89747	0	0.00151234	0.509	3802	tags=44%, list=28%, signal=60%
GOBP_CELLULAR_RESPONSE_TO_AMYLOID_BETA	GOBP_CELLULAR_RESPONSE_TO_AMYLOID_BETA		29	-0.64917	-1.89653	0	0.0015312	0.514	1657	tags=41%, list=12%, signal=47%
GOCC_CELL_CORTEX_REGION	GOCC_CELL_CORTEX_REGION		36	-0.615949	-1.89607	0.00187266	0.00153921	0.517	2621	tags=47%, list=19%, signal=58%
GOBP_NEURAL_PRECURSOR_CELL_PROLIFERATION	GOBP_NEURAL_PRECURSOR_CELL_PROLIFERATION		160	-0.471121	-1.8949	0	0.0015615	0.526	2832	tags=39%, list=21%, signal=49%
GOBP_POSITIVE_REGULATION_OF_OSTEOBLAST_DIFFERENTIATION	GOBP_POSITIVE_REGULATION_OF_OSTEOBLAST_DIFFERENTIATION		64	-0.554047	-1.89511	0	0.00156209	0.525	3002	tags=48%, list=22%, signal=62%
GOBP_APPENDAGE_DEVELOPMENT	GOBP_APPENDAGE_DEVELOPMENT		151	-0.478005	-1.89444	0	0.00157368	0.529	2898	tags=37%, list=21%, signal=47%
GOBP_EMBRYONIC_ORGAN_MORPHOGENESIS	GOBP_EMBRYONIC_ORGAN_MORPHOGENESIS		238	-0.451854	-1.89408	0	0.00157516	0.531	3995	tags=48%, list=29%, signal=67%
GOBP_REGULATION_OF_SYNAPTIC_VESICLE_RECYCLING	GOBP_REGULATION_OF_SYNAPTIC_VESICLE_RECYCLING		28	-0.644926	-1.89372	0.00191939	0.00158507	0.534	1434	tags=36%, list=11%, signal=40%
GOBP_REGULATION_OF_DENDRITIC_SPINE_DEVELOPMENT	GOBP_REGULATION_OF_DENDRITIC_SPINE_DEVELOPMENT		78	-0.534393	-1.89353	0	0.00158875	0.535	2808	tags=41%, list=21%, signal=51%
GOCC_CELL_CORTEX	GOCC_CELL_CORTEX		234	-0.452682	-1.89308	0	0.00159451	0.535	2661	tags=31%, list=20%, signal=38%
GOBP_NERVE_DEVELOPMENT	GOBP_NERVE_DEVELOPMENT		68	-0.54296	-1.89286	0	0.00159802	0.537	1922	tags=37%, list=14%, signal=43%
GOBP_RETINA_DEVELOPMENT_IN_CAMERA_TYPE_EYE	GOBP_RETINA_DEVELOPMENT_IN_CAMERA_TYPE_EYE		111	-0.498162	-1.8923	0	0.00161436	0.54	2154	tags=32%, list=16%, signal=38%
GOBP_NEUROTRANSMITTER_GATED_ION_CHANNEL_CLUSTERING	GOBP_NEUROTRANSMITTER_GATED_ION_CHANNEL_CLUSTERING		16	-0.745119	-1.89028	0.00191571	0.00164085	0.544	2268	tags=63%, list=17%, signal=75%
GOBP_REGULATION_OF_ENDOCRINE_PROCESS	GOBP_REGULATION_OF_ENDOCRINE_PROCESS		37	-0.602839	-1.89048	0	0.00164361	0.544	3084	tags=43%, list=23%, signal=56%
GOBP_MEMBRANE_REPOLARIZATION	GOBP_MEMBRANE_REPOLARIZATION		35	-0.607414	-1.89062	0	0.00164639	0.544	1720	tags=40%, list=13%, signal=46%
GOBP_POSITIVE_REGULATION_OF_DENDRITE_DEVELOPMENT	GOBP_POSITIVE_REGULATION_OF_DENDRITE_DEVELOPMENT		20	-0.700348	-1.89085	0	0.00164918	0.544	2245	tags=55%, list=17%, signal=66%
GOBP_LIGAND_GATED_ION_CHANNEL_SIGNALING_PATHWAY	GOBP_LIGAND_GATED_ION_CHANNEL_SIGNALING_PATHWAY		15	-0.7541	-1.88837	0	0.0016985	0.558	3238	tags=87%, list=24%, signal=114%
GOBP_REGULATION_OF_ESTABLISHMENT_OR_MAINTENANCE_OF_CELL_POLARITY	GOBP_REGULATION_OF_ESTABLISHMENT_OR_MAINTENANCE_OF_CELL_POLARITY		23	-0.669442	-1.88812	0	0.00169983	0.558	2142	tags=48%, list=16%, signal=57%
GOBP_ENDOCYTOSIS	GOBP_ENDOCYTOSIS		466	-0.428966	-1.8873	0	0.00170642	0.56	3397	tags=36%, list=25%, signal=46%
GOBP_NEGATIVE_REGULATION_OF_SECRETION	GOBP_NEGATIVE_REGULATION_OF_SECRETION		152	-0.479316	-1.88732	0	0.00170928	0.56	2924	tags=38%, list=22%, signal=48%
GOBP_RESPONSE_TO_PURINE_CONTAINING_COMPOUND	GOBP_RESPONSE_TO_PURINE_CONTAINING_COMPOUND		85	-0.518613	-1.88681	0	0.0017164	0.564	2308	tags=32%, list=17%, signal=38%
GOBP_CARDIAC_VENTRICLE_DEVELOPMENT	GOBP_CARDIAC_VENTRICLE_DEVELOPMENT		115	-0.50026	-1.88685	0	0.0017172	0.564	2874	tags=38%, list=21%, signal=48%
GOBP_NEGATIVE_REGULATION_OF_CANONICAL_WNT_SIGNALING_PATHWAY	GOBP_NEGATIVE_REGULATION_OF_CANONICAL_WNT_SIGNALING_PATHWAY		115	-0.502201	-1.88691	0	0.00172007	0.564	3590	tags=44%, list=26%, signal=60%
GOCC_CELL_BODY_MEMBRANE	GOCC_CELL_BODY_MEMBRANE		29	-0.651463	-1.88598	0	0.00172909	0.567	2325	tags=52%, list=17%, signal=62%
GOBP_ORGANIC_CATION_TRANSPORT	GOBP_ORGANIC_CATION_TRANSPORT		38	-0.605936	-1.88626	0	0.00172993	0.567	1573	tags=29%, list=12%, signal=33%
GOBP_REGULATION_OF_SENSORY_PERCEPTION	GOBP_REGULATION_OF_SENSORY_PERCEPTION		40	-0.595625	-1.88463	0	0.00175932	0.576	2307	tags=50%, list=17%, signal=60%
GOBP_NEPHRON_DEVELOPMENT	GOBP_NEPHRON_DEVELOPMENT		123	-0.494641	-1.88477	0	0.00176114	0.574	2971	tags=38%, list=22%, signal=48%
GOBP_REGULATION_OF_BMP_SIGNALING_PATHWAY	GOBP_REGULATION_OF_BMP_SIGNALING_PATHWAY		75	-0.527548	-1.88471	0	0.00176223	0.576	4289	tags=57%, list=32%, signal=83%
GOBP_EXPLORATION_BEHAVIOR	GOBP_EXPLORATION_BEHAVIOR		26	-0.65067	-1.8832	0.0018315	0.00180119	0.583	1684	tags=42%, list=12%, signal=48%
GOBP_CARDIAC_RIGHT_VENTRICLE_MORPHOGENESIS	GOBP_CARDIAC_RIGHT_VENTRICLE_MORPHOGENESIS		16	-0.759374	-1.8823	0	0.0018147	0.588	2834	tags=75%, list=21%, signal=95%
GOBP_VENTRICULAR_SEPTUM_DEVELOPMENT	GOBP_VENTRICULAR_SEPTUM_DEVELOPMENT		69	-0.537154	-1.88241	0	0.00181562	0.588	3331	tags=45%, list=25%, signal=59%
GOBP_ESTABLISHMENT_OF_TISSUE_POLARITY	GOBP_ESTABLISHMENT_OF_TISSUE_POLARITY		56	-0.555283	-1.88205	0	0.00181684	0.589	2836	tags=38%, list=21%, signal=47%
GOBP_REGULATION_OF_FIBROBLAST_MIGRATION	GOBP_REGULATION_OF_FIBROBLAST_MIGRATION		42	-0.591221	-1.88218	0	0.00181777	0.589	3114	tags=45%, list=23%, signal=59%
GOBP_ACTIVATION_OF_GTPASE_ACTIVITY	GOBP_ACTIVATION_OF_GTPASE_ACTIVITY		95	-0.509819	-1.88244	0	0.0018186	0.588	3741	tags=48%, list=28%, signal=66%
GOBP_POSITIVE_REGULATION_OF_POTASSIUM_ION_TRANSMEMBRANE_TRANSPORTER_ACTIVITY	GOBP_POSITIVE_REGULATION_OF_POTASSIUM_ION_TRANSMEMBRANE_TRANSPORTER_ACTIVITY		19	-0.697074	-1.88181	0	0.00181993	0.59	2727	tags=53%, list=20%, signal=66%
GOBP_CALCIUM_ION_TRANSPORT_INTO_CYTOSOL	GOBP_CALCIUM_ION_TRANSPORT_INTO_CYTOSOL		26	-0.658744	-1.88083	0	0.00184224	0.594	2577	tags=62%, list=19%, signal=76%
GOBP_SEMI_LUNAR_VALVE_DEVELOPMENT	GOBP_SEMI_LUNAR_VALVE_DEVELOPMENT		28	-0.642912	-1.88084	0	0.00184525	0.594	2970	tags=50%, list=22%, signal=64%
GOBP_PLATELET_DERIVED_GROWTH_FACTOR_RECEPTOR_SIGNALING_PATHWAY	GOBP_PLATELET_DERIVED_GROWTH_FACTOR_RECEPTOR_SIGNALING_PATHWAY		57	-0.555547	-1.8802	0	0.00184933	0.595	3980	tags=61%, list=29%, signal=87%
GOBP_CEREBELLAR_PURKINJE_CELL_LAYER_DEVELOPMENT	GOBP_CEREBELLAR_PURKINJE_CELL_LAYER_DEVELOPMENT		34	-0.616517	-1.87953	0	0.0018664	0.602	1576	tags=44%, list=12%, signal=50%
GOBP_FIBROBLAST_MIGRATION	GOBP_FIBROBLAST_MIGRATION		61	-0.542588	-1.87848	0	0.00188135	0.606	3114	tags=41%, list=23%, signal=53%
GOBP_REGULATION_OF_CELL_PROJECTION_ASSEMBLY	GOBP_REGULATION_OF_CELL_PROJECTION_ASSEMBLY		170	-0.4632	-1.87796	0	0.00189828	0.609	3185	tags=35%, list=23%, signal=46%
GOBP_NEGATIVE_REGULATION_OF_WNT_SIGNALING_PATHWAY	GOBP_NEGATIVE_REGULATION_OF_WNT_SIGNALING_PATHWAY		141	-0.481684	-1.87737	0	0.00191702	0.613	3590	tags=42%, list=26%, signal=56%
GOBP_POSITIVE_REGULATION_OF_CALCIUM_ION_TRANSMEMBRANE_TRANSPORT	GOBP_POSITIVE_REGULATION_OF_CALCIUM_ION_TRANSMEMBRANE_TRANSPORT		77	-0.526284	-1.87712	0	0.00192787	0.616	1897	tags=30%, list=14%, signal=35%
GOBP_RESPONSE_TO_AXON_INJURY	GOBP_RESPONSE_TO_AXON_INJURY		66	-0.541865	-1.87674	0	0.00193467	0.618	2755	tags=41%, list=20%, signal=51%
GOBP_VASCULAR_ENDOTHELIAL_GROWTH_FACTOR_RECEPTOR_SIGNALING_PATHWAY	GOBP_VASCULAR_ENDOTHELIAL_GROWTH_FACTOR_RECEPTOR_SIGNALING_PATHWAY		43	-0.572894	-1.87615	0	0.00195147	0.623	3138	tags=49%, list=23%, signal=63%
GOBP_MUSCLE_ORGAN_DEVELOPMENT	GOBP_MUSCLE_ORGAN_DEVELOPMENT		244	-0.454236	-1.87607	0	0.00195235	0.623	2959	tags=36%, list=22%, signal=45%
GOBP_PEPTIDYL_SERINE_MODIFICATION	GOBP_PEPTIDYL_SERINE_MODIFICATION		286	-0.441612	-1.87565	0	0.00196488	0.625	2877	tags=34%, list=21%, signal=42%
GOMF_BETA_CATENIN_BINDING	GOMF_BETA_CATENIN_BINDING		84	-0.516482	-1.87509	0	0.00198733	0.632	3215	tags=46%, list=24%, signal=60%
GOBP_NEGATIVE_REGULATION_OF_LOCOMOTION	GOBP_NEGATIVE_REGULATION_OF_LOCOMOTION		294	-0.440535	-1.87417	0	0.00201365	0.64	3552	tags=40%, list=26%, signal=53%
GOBP_REGULATION_OF_OSTEOBLAST_PROLIFERATION	GOBP_REGULATION_OF_OSTEOBLAST_PROLIFERATION		27	-0.639893	-1.87354	0	0.0020261	0.643	3586	tags=59%, list=26%, signal=80%
GOBP_CELLULAR_RESPONSE_TO_NITROGEN_COMPOUND	GOBP_CELLULAR_RESPONSE_TO_NITROGEN_COMPOUND		491	-0.42186	-1.8725	0	0.00205496	0.65	2760	tags=32%, list=20%, signal=38%
GOBP_BONE_MATURATION	GOBP_BONE_MATURATION		23	-0.674913	-1.87251	0	0.0020563	0.65	2434	tags=65%, list=18%, signal=79%
GOBP_LOCOMOTOR_RHYTHM	GOBP_LOCOMOTOR_RHYTHM		17	-0.719406	-1.87236	0.00205761	0.00205755	0.653	1737	tags=47%, list=13%, signal=54%
GOBP_EPITHELIAL_CELL_DEVELOPMENT	GOBP_EPITHELIAL_CELL_DEVELOPMENT		195	-0.462313	-1.87175	0	0.00207211	0.659	2713	tags=32%, list=20%, signal=39%
GOBP_LONG_TERM_MEMORY	GOBP_LONG_TERM_MEMORY		37	-0.600697	-1.87151	0	0.00207335	0.661	3163	tags=51%, list=23%, signal=67%
GOBP_CARDIAC_VENTRICLE_MORPHOGENESIS	GOBP_CARDIAC_VENTRICLE_MORPHOGENESIS		61	-0.541961	-1.87174	0	0.00207472	0.661	2874	tags=43%, list=21%, signal=54%
GOBP_PROTEIN_LOCALIZATION_TO_EXTRACELLULAR_REGION	GOBP_PROTEIN_LOCALIZATION_TO_EXTRACELLULAR_REGION		319	-0.436243	-1.8703	0	0.00209538	0.665	2607	tags=30%, list=19%, signal=36%
GOBP_ENERGY_HOMEOSTASIS	GOBP_ENERGY_HOMEOSTASIS		43	-0.582712	-1.86948	0	0.00211544	0.67	2388	tags=42%, list=18%, signal=51%
GOMF_LIGAND_GATED_CALCIUM_CHANNEL_ACTIVITY	GOMF_LIGAND_GATED_CALCIUM_CHANNEL_ACTIVITY		18	-0.705415	-1.86912	0.0038835	0.00212563	0.674	1412	tags=33%, list=10%, signal=37%
GOBP_FILOPODIUM_ASSEMBLY	GOBP_FILOPODIUM_ASSEMBLY		64	-0.54867	-1.86744	0	0.002165	0.684	3784	tags=50%, list=28%, signal=69%
GOBP_RESPONSE_TO_PAIN	GOBP_RESPONSE_TO_PAIN		32	-0.62503	-1.86507	0	0.002218	0.694	2988	tags=53%, list=22%, signal=68%
GOBP_AXONAL_TRANSPORT_OF_MITOCHONDRION	GOBP_AXONAL_TRANSPORT_OF_MITOCHONDRION		16	-0.723853	-1.86441	0	0.00223396	0.696	2400	tags=56%, list=18%, signal=68%
GOBP_REGULATION_OF_COLLATERAL_SPROUTING	GOBP_REGULATION_OF_COLLATERAL_SPROUTING		20	-0.691913	-1.86409	0.00194553	0.00223434	0.696	1597	tags=45%, list=12%, signal=51%
GOBP_INSULIN_LIKE_GROWTH_FACTOR_RECEPTOR_SIGNALING_PATHWAY	GOBP_INSULIN_LIKE_GROWTH_FACTOR_RECEPTOR_SIGNALING_PATHWAY		28	-0.63816	-1.86277	0	0.00230179	0.708	2859	tags=50%, list=21%, signal=63%
GOBP_MICROTUBULE_BASED_TRANSPORT	GOBP_MICROTUBULE_BASED_TRANSPORT		160	-0.472147	-1.86237	0	0.0023117	0.713	3957	tags=49%, list=29%, signal=69%
GOBP_TRANSPORT_ALONG_MICROTUBULE	GOBP_TRANSPORT_ALONG_MICROTUBULE		148	-0.478602	-1.86116	0	0.00235645	0.716	3957	tags=51%, list=29%, signal=72%
GOBP_REGULATION_OF_CELLULAR_COMPONENT_SIZE	GOBP_REGULATION_OF_CELLULAR_COMPONENT_SIZE		324	-0.434278	-1.86056	0	0.00237943	0.718	3068	tags=36%, list=23%, signal=45%
GOBP_POSITIVE_REGULATION_OF_CELL_SUBSTRATE_ADHESION	GOBP_POSITIVE_REGULATION_OF_CELL_SUBSTRATE_ADHESION		115	-0.486396	-1.86018	0	0.002391	0.721	3552	tags=44%, list=26%, signal=60%
GOBP_REGULATION_OF_FILOPODIUM_ASSEMBLY	GOBP_REGULATION_OF_FILOPODIUM_ASSEMBLY		48	-0.572831	-1.86004	0	0.002395	0.723	3784	tags=58%, list=28%, signal=81%
GOBP_REGULATION_OF_CELL_SIZE	GOBP_REGULATION_OF_CELL_SIZE		180	-0.466293	-1.8599	0	0.00239705	0.725	1746	tags=28%, list=13%, signal=31%
GOBP_MORPHOGENESIS_OF_A_BRANCHING_STRUCTURE	GOBP_MORPHOGENESIS_OF_A_BRANCHING_STRUCTURE		215	-0.452605	-1.85975	0	0.00239717	0.725	4057	tags=46%, list=30%, signal=65%
GOBP_REGULATION_OF_SMOOTH_MUSCLE_CONTRACTION	GOBP_REGULATION_OF_SMOOTH_MUSCLE_CONTRACTION		56	-0.552279	-1.85993	0	0.00239881	0.725	2988	tags=48%, list=22%, signal=62%
GOBP_SMOOTH_MUSCLE_TISSUE_DEVELOPMENT	GOBP_SMOOTH_MUSCLE_TISSUE_DEVELOPMENT		21	-0.670344	-1.85954	0	0.00239914	0.726	3309	tags=71%, list=24%, signal=94%
GOBP_CAMERA_TYPE_EYE_MORPHOGENESIS	GOBP_CAMERA_TYPE_EYE_MORPHOGENESIS		107	-0.497339	-1.85807	0	0.00244845	0.735	3553	tags=44%, list=26%, signal=59%
GOMF_KINESIN_BINDING	GOMF_KINESIN_BINDING		42	-0.586358	-1.85732	0	0.00246914	0.741	2225	tags=48%, list=16%, signal=57%
GOBP_CEREBRAL_CORTEX_RADIALLY_ORIENTED_CELL_MIGRATION	GOBP_CEREBRAL_CORTEX_RADIALLY_ORIENTED_CELL_MIGRATION		33	-0.597169	-1.85737	0	0.00247104	0.741	2977	tags=58%, list=22%, signal=74%
GOBP_ANATOMICAL_STRUCTURE_MATURATION	GOBP_ANATOMICAL_STRUCTURE_MATURATION		195	-0.456878	-1.85636	0	0.00250502	0.748	3016	tags=37%, list=22%, signal=47%
GOBP_CORONARY_VASCULATURE_MORPHOGENESIS	GOBP_CORONARY_VASCULATURE_MORPHOGENESIS		27	-0.635129	-1.85567	0.00195695	0.00250841	0.754	3954	tags=74%, list=29%, signal=104%
GOBP_SPROUTING_ANGIOGENESIS	GOBP_SPROUTING_ANGIOGENESIS		106	-0.499818	-1.85532	0	0.00251013	0.754	3846	tags=50%, list=28%, signal=69%
GOBP_RAS_PROTEIN_SIGNAL_TRANSDUCTION	GOBP_RAS_PROTEIN_SIGNAL_TRANSDUCTION		300	-0.435043	-1.85545	0	0.00251021	0.754	3411	tags=39%, list=25%, signal=51%
GOBP_LIMBIC_SYSTEM_DEVELOPMENT	GOBP_LIMBIC_SYSTEM_DEVELOPMENT		75	-0.520282	-1.85575	0	0.00251046	0.752	2540	tags=40%, list=19%, signal=49%
GOBP_POSITIVE_REGULATION_OF_NEUROTRANSMITTER_TRANSPORT	GOBP_POSITIVE_REGULATION_OF_NEUROTRANSMITTER_TRANSPORT		20	-0.688735	-1.8559	0	0.00251053	0.751	1375	tags=45%, list=10%, signal=50%
GOBP_NEURON_CELLULAR_HOMEOSTASIS	GOBP_NEURON_CELLULAR_HOMEOSTASIS		36	-0.600157	-1.85572	0.00176367	0.00251221	0.754	3034	tags=44%, list=22%, signal=57%
GOBP_RHO_PROTEIN_SIGNAL_TRANSDUCTION	GOBP_RHO_PROTEIN_SIGNAL_TRANSDUCTION		117	-0.481075	-1.85597	0	0.00251246	0.751	3100	tags=39%, list=23%, signal=51%
GOBP_CARDIAC_CELL_DEVELOPMENT	GOBP_CARDIAC_CELL_DEVELOPMENT		79	-0.516564	-1.85603	0	0.00251629	0.751	3711	tags=53%, list=27%, signal=73%
GOBP_AMEBOIDAL_TYPE_CELL_MIGRATION	GOBP_AMEBOIDAL_TYPE_CELL_MIGRATION		398	-0.424626	-1.85451	0	0.00253432	0.756	4099	tags=45%, list=30%, signal=62%
GOBP_RELAXATION_OF_CARDIAC_MUSCLE	GOBP_RELAXATION_OF_CARDIAC_MUSCLE		15	-0.729192	-1.8541	0	0.00254358	0.758	2573	tags=60%, list=19%, signal=74%
GOBP_EPHRIN_RECEPTOR_SIGNALING_PATHWAY	GOBP_EPHRIN_RECEPTOR_SIGNALING_PATHWAY		33	-0.614335	-1.85345	0.00187266	0.00256393	0.761	3890	tags=52%, list=29%, signal=72%
GOBP_NEGATIVE_REGULATION_OF_CALCIUM_ION_TRANSMEMBRANE_TRANSPORT	GOBP_NEGATIVE_REGULATION_OF_CALCIUM_ION_TRANSMEMBRANE_TRANSPORT		43	-0.585607	-1.85324	0	0.00257118	0.762	2396	tags=42%, list=18%, signal=51%
GOBP_REGULATION_OF_EXTRACELLULAR_MATRIX_ORGANIZATION	GOBP_REGULATION_OF_EXTRACELLULAR_MATRIX_ORGANIZATION		51	-0.559207	-1.85231	0	0.00260644	0.764	2560	tags=39%, list=19%, signal=48%
GOBP_ANGIOGENESIS	GOBP_ANGIOGENESIS		446	-0.419426	-1.85174	0	0.0026303	0.769	3583	tags=37%, list=26%, signal=49%
GOBP_REGULATION_OF_OSSIFICATION	GOBP_REGULATION_OF_OSSIFICATION		105	-0.494856	-1.85132	0	0.00263162	0.77	3331	tags=42%, list=25%, signal=55%
GOBP_STRIATED_MUSCLE_TISSUE_DEVELOPMENT	GOBP_STRIATED_MUSCLE_TISSUE_DEVELOPMENT		214	-0.452392	-1.85137	0	0.00263555	0.77	3215	tags=42%, list=24%, signal=54%
GOBP_REGULATION_OF_ACTIN_FILAMENT_BASED_PROCESS	GOBP_REGULATION_OF_ACTIN_FILAMENT_BASED_PROCESS		346	-0.433013	-1.85053	0	0.00266639	0.773	2275	tags=29%, list=17%, signal=33%
GOBP_CEREBELLAR_PURKINJE_CELL_LAYER_FORMATION	GOBP_CEREBELLAR_PURKINJE_CELL_LAYER_FORMATION		17	-0.706091	-1.84887	0	0.00273222	0.781	3110	tags=71%, list=23%, signal=91%
GOBP_RESPONSE_TO_MUSCLE_STRETCH	GOBP_RESPONSE_TO_MUSCLE_STRETCH		16	-0.725147	-1.84819	0.00378072	0.0027365	0.782	2068	tags=44%, list=15%, signal=52%
GOBP_REGULATION_OF_CHOLESTEROL_EFFLUX	GOBP_REGULATION_OF_CHOLESTEROL_EFFLUX		34	-0.60621	-1.84826	0	0.00274056	0.782	3000	tags=35%, list=22%, signal=45%
GOBP_VISUAL_BEHAVIOR	GOBP_VISUAL_BEHAVIOR		53	-0.54549	-1.84832	0	0.00274462	0.782	3397	tags=49%, list=25%, signal=65%
GOBP_CAMP_MEDIATED_SIGNALING	GOBP_CAMP_MEDIATED_SIGNALING		45	-0.572715	-1.84713	0	0.00279098	0.788	2620	tags=51%, list=19%, signal=63%
GOBP_RESPONSE_TO_ALKALOID	GOBP_RESPONSE_TO_ALKALOID		56	-0.543712	-1.84644	0	0.0028162	0.791	2442	tags=43%, list=18%, signal=52%
GOBP_NON_CANONICAL_WNT_SIGNALING_PATHWAY	GOBP_NON_CANONICAL_WNT_SIGNALING_PATHWAY		48	-0.5653	-1.84603	0	0.00282846	0.792	3715	tags=50%, list=27%, signal=69%
GOBP_REGULATION_OF_MICROTUBULE_POLYMERIZATION_OR_DEPOLYMERIZATION	GOBP_REGULATION_OF_MICROTUBULE_POLYMERIZATION_OR_DEPOLYMERIZATION		79	-0.519047	-1.84551	0	0.00283833	0.793	2713	tags=47%, list=20%, signal=58%
GOBP_ACTIN_FILAMENT_ORGANIZATION	GOBP_ACTIN_FILAMENT_ORGANIZATION		372	-0.425643	-1.84562	0	0.00284251	0.793	3171	tags=34%, list=23%, signal=43%
GOBP_REPRODUCTIVE_BEHAVIOR	GOBP_REPRODUCTIVE_BEHAVIOR		45	-0.570206	-1.8449	0	0.00285175	0.794	2988	tags=56%, list=22%, signal=71%
GOBP_POSITIVE_REGULATION_OF_CELL_DEVELOPMENT	GOBP_POSITIVE_REGULATION_OF_CELL_DEVELOPMENT		310	-0.432322	-1.84498	0	0.00285416	0.794	3017	tags=36%, list=22%, signal=45%
GOBP_POSITIVE_REGULATION_OF_CYCLASE_ACTIVITY	GOBP_POSITIVE_REGULATION_OF_CYCLASE_ACTIVITY		28	-0.621338	-1.84429	0	0.00286515	0.798	1617	tags=36%, list=12%, signal=40%
GOBP_REGULATION_OF_MEMBRANE_REPOLARIZATION	GOBP_REGULATION_OF_MEMBRANE_REPOLARIZATION		28	-0.626424	-1.84436	0.00187617	0.00286754	0.798	1720	tags=43%, list=13%, signal=49%
GOBP_REGULATION_OF_HORMONE_SECRETION	GOBP_REGULATION_OF_HORMONE_SECRETION		222	-0.444989	-1.84391	0	0.00289367	0.803	3084	tags=37%, list=23%, signal=47%
GOBP_CELL_CELL_SIGNALING_BY_WNT	GOBP_CELL_CELL_SIGNALING_BY_WNT		356	-0.425847	-1.84368	0	0.00289839	0.804	3590	tags=38%, list=26%, signal=50%
GOBP_AORTA_DEVELOPMENT	GOBP_AORTA_DEVELOPMENT		59	-0.543654	-1.84247	0	0.00293641	0.81	3309	tags=46%, list=24%, signal=60%
GOBP_CARDIAC_LEFT_VENTRICLE_MORPHOGENESIS	GOBP_CARDIAC_LEFT_VENTRICLE_MORPHOGENESIS		17	-0.708277	-1.84263	0.00402414	0.00293715	0.81	2312	tags=53%, list=17%, signal=64%
GOCC_SECRETORY_GRANULE_MEMBRANE	GOCC_SECRETORY_GRANULE_MEMBRANE		68	-0.527593	-1.84146	0	0.00296464	0.817	1822	tags=31%, list=13%, signal=35%
GOBP_RETINA_MORPHOGENESIS_IN_CAMERA_TYPE_EYE	GOBP_RETINA_MORPHOGENESIS_IN_CAMERA_TYPE_EYE		50	-0.557971	-1.84047	0	0.0029961	0.82	2154	tags=36%, list=16%, signal=43%
GOBP_CARDIAC_MUSCLE_CELL_DIFFERENTIATION	GOBP_CARDIAC_MUSCLE_CELL_DIFFERENTIATION		108	-0.491846	-1.84041	0	0.00299714	0.82	3711	tags=51%, list=27%, signal=70%
GOBP_MEMBRANE_DEPOLARIZATION_DURING_CARDIAC_MUSCLE_CELL_ACTION_POTENTIAL	GOBP_MEMBRANE_DEPOLARIZATION_DURING_CARDIAC_MUSCLE_CELL_ACTION_POTENTIAL		15	-0.732025	-1.83874	0.00196078	0.00304143	0.824	919	tags=47%, list=7%, signal=50%
GOBP_CIRCADIAN_SLEEP_WAKE_CYCLE_PROCESS	GOBP_CIRCADIAN_SLEEP_WAKE_CYCLE_PROCESS		16	-0.708061	-1.83894	0.0017762	0.00304225	0.824	2225	tags=56%, list=16%, signal=67%
GOBP_RELAXATION_OF_MUSCLE	GOBP_RELAXATION_OF_MUSCLE		26	-0.643675	-1.83896	0	0.00304663	0.824	2573	tags=54%, list=19%, signal=66%
GOBP_POSTSYNAPTIC_MEMBRANE_ORGANIZATION	GOBP_POSTSYNAPTIC_MEMBRANE_ORGANIZATION		39	-0.588824	-1.83912	0	0.00304926	0.824	2268	tags=51%, list=17%, signal=61%
GOBP_MAINTENANCE_OF_SYNAPSE_STRUCTURE	GOBP_MAINTENANCE_OF_SYNAPSE_STRUCTURE		18	-0.69586	-1.83853	0.00200803	0.00304939	0.824	1865	tags=56%, list=14%, signal=64%
GOBP_NEGATIVE_REGULATION_OF_DEVELOPMENTAL_GROWTH	GOBP_NEGATIVE_REGULATION_OF_DEVELOPMENTAL_GROWTH		109	-0.489791	-1.83916	0	0.00305366	0.824	2783	tags=35%, list=21%, signal=44%
GOBP_REGULATION_OF_RELEASE_OF_SEQUESTERED_CALCIUM_ION_INTO_CYTOSOL	GOBP_REGULATION_OF_RELEASE_OF_SEQUESTERED_CALCIUM_ION_INTO_CYTOSOL		60	-0.538774	-1.8382	0	0.00305649	0.826	2234	tags=35%, list=16%, signal=42%
GOBP_RESPONSE_TO_BMP	GOBP_RESPONSE_TO_BMP		124	-0.480628	-1.83821	0	0.00306086	0.826	4327	tags=55%, list=32%, signal=80%
GOBP_GLIAL_CELL_MIGRATION	GOBP_GLIAL_CELL_MIGRATION		62	-0.534779	-1.8357	0	0.00315617	0.837	2995	tags=47%, list=22%, signal=60%
GOMF_ACTIN_FILAMENT_BINDING	GOMF_ACTIN_FILAMENT_BINDING		173	-0.462686	-1.83545	0	0.00315877	0.837	3087	tags=35%, list=23%, signal=45%
GOBP_INHIBITORY_POSTSYNAPTIC_POTENTIAL	GOBP_INHIBITORY_POSTSYNAPTIC_POTENTIAL		17	-0.712183	-1.83499	0	0.00317363	0.839	1595	tags=47%, list=12%, signal=53%
GOBP_CYCLIC_NUCLEOTIDE_METABOLIC_PROCESS	GOBP_CYCLIC_NUCLEOTIDE_METABOLIC_PROCESS		21	-0.661962	-1.83479	0.00201207	0.00317613	0.841	2440	tags=52%, list=18%, signal=64%
GOBP_RETINA_LAYER_FORMATION	GOBP_RETINA_LAYER_FORMATION		16	-0.71919	-1.83374	0	0.00321556	0.843	804	tags=31%, list=6%, signal=33%
GOBP_REGULATION_OF_PROTEIN_SECRETION	GOBP_REGULATION_OF_PROTEIN_SECRETION		235	-0.440735	-1.83305	0	0.00323211	0.845	2607	tags=29%, list=19%, signal=36%
GOBP_EYE_PHOTORECEPTOR_CELL_DIFFERENTIATION	GOBP_EYE_PHOTORECEPTOR_CELL_DIFFERENTIATION		35	-0.599634	-1.83296	0	0.00323455	0.845	3297	tags=57%, list=24%, signal=75%
GOBP_BONE_MINERALIZATION	GOBP_BONE_MINERALIZATION		98	-0.496882	-1.83261	0	0.00324394	0.845	3334	tags=44%, list=25%, signal=58%
GOBP_ACROSOME_REACTION	GOBP_ACROSOME_REACTION		18	-0.706368	-1.83166	0	0.00327775	0.848	2127	tags=50%, list=16%, signal=59%
GOBP_REGULATION_OF_CHONDROCYTE_DIFFERENTIATION	GOBP_REGULATION_OF_CHONDROCYTE_DIFFERENTIATION		45	-0.56976	-1.83113	0.0019305	0.00328589	0.85	3215	tags=49%, list=24%, signal=64%
GOBP_NEUROBLAST_PROLIFERATION	GOBP_NEUROBLAST_PROLIFERATION		57	-0.553381	-1.83118	0	0.00329052	0.85	2832	tags=47%, list=21%, signal=60%
GOBP_CARDIOCYTE_DIFFERENTIATION	GOBP_CARDIOCYTE_DIFFERENTIATION		140	-0.46749	-1.83027	0	0.00334387	0.859	3711	tags=48%, list=27%, signal=65%
GOBP_GLAND_MORPHOGENESIS	GOBP_GLAND_MORPHOGENESIS		132	-0.473856	-1.83005	0	0.00334493	0.862	2604	tags=31%, list=19%, signal=38%
GOBP_NEGATIVE_REGULATION_OF_TRANSMEMBRANE_TRANSPORT	GOBP_NEGATIVE_REGULATION_OF_TRANSMEMBRANE_TRANSPORT		113	-0.486364	-1.82973	0	0.00334544	0.864	3650	tags=48%, list=27%, signal=65%
GOBP_REGULATION_OF_HIPPO_SIGNALING	GOBP_REGULATION_OF_HIPPO_SIGNALING		16	-0.716895	-1.83008	0.00747664	0.00334962	0.862	2155	tags=31%, list=16%, signal=37%
GOBP_ENDOCARDIAL_CUSHION_MORPHOGENESIS	GOBP_ENDOCARDIAL_CUSHION_MORPHOGENESIS		34	-0.591709	-1.82921	0.00182149	0.00337018	0.869	3955	tags=53%, list=29%, signal=75%
GOBP_CIRCADIAN_SLEEP_WAKE_CYCLE	GOBP_CIRCADIAN_SLEEP_WAKE_CYCLE		21	-0.665359	-1.82902	0	0.00337063	0.869	2225	tags=48%, list=16%, signal=57%
GOMF_CALCIUM_DEPENDENT_PROTEIN_KINASE_ACTIVITY	GOMF_CALCIUM_DEPENDENT_PROTEIN_KINASE_ACTIVITY		24	-0.65538	-1.82715	0.00194175	0.00345248	0.876	4360	tags=75%, list=32%, signal=110%
GOBP_KIDNEY_EPITHELIUM_DEVELOPMENT	GOBP_KIDNEY_EPITHELIUM_DEVELOPMENT		120	-0.479411	-1.82708	0	0.00345283	0.877	4026	tags=48%, list=30%, signal=67%
GOMF_CHANNEL_REGULATOR_ACTIVITY	GOMF_CHANNEL_REGULATOR_ACTIVITY		108	-0.480805	-1.82683	0.0018622	0.00345356	0.88	2465	tags=38%, list=18%, signal=46%
GOMF_STRUCTURAL_CONSTITUENT_OF_POSTSYNAPSE	GOMF_STRUCTURAL_CONSTITUENT_OF_POSTSYNAPSE		19	-0.676559	-1.82684	0.00379507	0.00345836	0.88	1943	tags=68%, list=14%, signal=80%
GOBP_TRABECULA_MORPHOGENESIS	GOBP_TRABECULA_MORPHOGENESIS		50	-0.55826	-1.82515	0	0.00350601	0.882	2776	tags=36%, list=20%, signal=45%
GOBP_REGULATION_OF_NOTCH_SIGNALING_PATHWAY	GOBP_REGULATION_OF_NOTCH_SIGNALING_PATHWAY		70	-0.517462	-1.82522	0	0.00350739	0.882	2410	tags=34%, list=18%, signal=41%
GOBP_PHOSPHATIDYLINOSITOL_3_KINASE_SIGNALING	GOBP_PHOSPHATIDYLINOSITOL_3_KINASE_SIGNALING		104	-0.479201	-1.82531	0	0.00350879	0.882	3444	tags=47%, list=25%, signal=63%
GOBP_HEAD_MORPHOGENESIS	GOBP_HEAD_MORPHOGENESIS		35	-0.596442	-1.82489	0	0.00351303	0.882	3972	tags=60%, list=29%, signal=85%
GOBP_NEUROTRANSMITTER_RECEPTOR_INTERNALIZATION	GOBP_NEUROTRANSMITTER_RECEPTOR_INTERNALIZATION		32	-0.605648	-1.82466	0	0.00351838	0.882	2204	tags=47%, list=16%, signal=56%
GOBP_REGULATION_OF_EPITHELIAL_CELL_MIGRATION	GOBP_REGULATION_OF_EPITHELIAL_CELL_MIGRATION		215	-0.443605	-1.82405	0	0.00355082	0.884	3135	tags=34%, list=23%, signal=43%
GOBP_REGULATION_OF_NON_CANONICAL_WNT_SIGNALING_PATHWAY	GOBP_REGULATION_OF_NON_CANONICAL_WNT_SIGNALING_PATHWAY		23	-0.653118	-1.82371	0	0.00355956	0.884	2845	tags=48%, list=21%, signal=60%
GOBP_REGULATION_OF_ANIMAL_ORGAN_MORPHOGENESIS	GOBP_REGULATION_OF_ANIMAL_ORGAN_MORPHOGENESIS		104	-0.480711	-1.82094	0	0.00364294	0.888	2577	tags=30%, list=19%, signal=37%
GOBP_REGULATION_OF_EPITHELIAL_TO_MESENCHYMAL_TRANSITION	GOBP_REGULATION_OF_EPITHELIAL_TO_MESENCHYMAL_TRANSITION		88	-0.495493	-1.82059	0	0.00365651	0.889	4026	tags=50%, list=30%, signal=71%
GOBP_LENS_DEVELOPMENT_IN_CAMERA_TYPE_EYE	GOBP_LENS_DEVELOPMENT_IN_CAMERA_TYPE_EYE		58	-0.530377	-1.82033	0	0.00366169	0.889	4019	tags=50%, list=30%, signal=71%
GOBP_IMPORT_INTO_CELL	GOBP_IMPORT_INTO_CELL		176	-0.459328	-1.82004	0	0.00366184	0.892	2968	tags=34%, list=22%, signal=42%
GOCC_PHOTORECEPTOR_OUTER_SEGMENT	GOCC_PHOTORECEPTOR_OUTER_SEGMENT		45	-0.561703	-1.82006	0.00201613	0.00366517	0.892	2439	tags=38%, list=18%, signal=46%
GOMF_EPHRIN_RECEPTOR_BINDING	GOMF_EPHRIN_RECEPTOR_BINDING		32	-0.595627	-1.81931	0.00568182	0.00367879	0.892	3532	tags=44%, list=26%, signal=59%
GOBP_MESENCHYME_DEVELOPMENT	GOBP_MESENCHYME_DEVELOPMENT		245	-0.43302	-1.81898	0	0.0036939	0.894	4026	tags=49%, list=30%, signal=68%
GOBP_NEGATIVE_REGULATION_OF_RECEPTOR_MEDIATED_ENDOCYTOSIS	GOBP_NEGATIVE_REGULATION_OF_RECEPTOR_MEDIATED_ENDOCYTOSIS		24	-0.635806	-1.81711	0	0.00379645	0.903	3731	tags=71%, list=27%, signal=98%
GOBP_EMBRYONIC_ORGAN_DEVELOPMENT	GOBP_EMBRYONIC_ORGAN_DEVELOPMENT		391	-0.415168	-1.81692	0	0.00380471	0.905	3995	tags=43%, list=29%, signal=59%
GOBP_NITRIC_OXIDE_MEDIATED_SIGNAL_TRANSDUCTION	GOBP_NITRIC_OXIDE_MEDIATED_SIGNAL_TRANSDUCTION		20	-0.672629	-1.8165	0.00191939	0.00381297	0.905	2711	tags=50%, list=20%, signal=62%
GOBP_ION_HOMEOSTASIS	GOBP_ION_HOMEOSTASIS		457	-0.41302	-1.81602	0	0.00383452	0.905	3079	tags=30%, list=23%, signal=38%
GOBP_METAL_ION_HOMEOSTASIS	GOBP_METAL_ION_HOMEOSTASIS		379	-0.417294	-1.81566	0	0.00385259	0.906	2274	tags=25%, list=17%, signal=29%
GOBP_RESPONSE_TO_METAL_ION	GOBP_RESPONSE_TO_METAL_ION		226	-0.437042	-1.81522	0	0.00386571	0.908	2520	tags=30%, list=19%, signal=36%
GOBP_REGULATION_OF_NEURON_PROJECTION_REGENERATION	GOBP_REGULATION_OF_NEURON_PROJECTION_REGENERATION		35	-0.593181	-1.81418	0.0018797	0.0039119	0.911	2755	tags=43%, list=20%, signal=54%
GOBP_NEGATIVE_REGULATION_OF_CELLULAR_RESPONSE_TO_GROWTH_FACTOR_STIMULUS	GOBP_NEGATIVE_REGULATION_OF_CELLULAR_RESPONSE_TO_GROWTH_FACTOR_STIMULUS		81	-0.500827	-1.81393	0	0.00391662	0.911	3215	tags=38%, list=24%, signal=50%
GOBP_NEUROTROPHIN_SIGNALING_PATHWAY	GOBP_NEUROTROPHIN_SIGNALING_PATHWAY		39	-0.573161	-1.81419	0.00361664	0.00391717	0.911	3293	tags=46%, list=24%, signal=61%
GOBP_ADHERENS_JUNCTION_ORGANIZATION	GOBP_ADHERENS_JUNCTION_ORGANIZATION		41	-0.569615	-1.81275	0	0.00396082	0.911	3215	tags=46%, list=24%, signal=61%
GOBP_REGULATION_OF_POSTSYNAPTIC_SPECIALIZATION_ASSEMBLY	GOBP_REGULATION_OF_POSTSYNAPTIC_SPECIALIZATION_ASSEMBLY		15	-0.718384	-1.81288	0.00192678	0.00396449	0.911	3362	tags=87%, list=25%, signal=115%
GOMF_SH2_DOMAIN_BINDING	GOMF_SH2_DOMAIN_BINDING		39	-0.589299	-1.81293	0.00194175	0.00396645	0.911	3224	tags=51%, list=24%, signal=67%
GOBP_CHOLESTEROL_EFFLUX	GOBP_CHOLESTEROL_EFFLUX		44	-0.55917	-1.81225	0	0.00397508	0.914	3000	tags=30%, list=22%, signal=38%
GOBP_SARCOPLASMIC_RETICULUM_CALCIUM_ION_TRANSPORT	GOBP_SARCOPLASMIC_RETICULUM_CALCIUM_ION_TRANSPORT		23	-0.64333	-1.81241	0.00383142	0.00397705	0.913	2741	tags=52%, list=20%, signal=65%
GOMF_HEPARIN_BINDING	GOMF_HEPARIN_BINDING		113	-0.475958	-1.81196	0	0.00399123	0.915	2462	tags=35%, list=18%, signal=43%
GOBP_REFLEX	GOBP_REFLEX		18	-0.695466	-1.81047	0	0.0040833	0.921	1699	tags=44%, list=13%, signal=51%
GOCC_CALYX_OF_HELD	GOCC_CALYX_OF_HELD		23	-0.652174	-1.80925	0.00186916	0.00411319	0.923	2225	tags=70%, list=16%, signal=83%
GOMF_PHOSPHORIC_DIESTER_HYDROLASE_ACTIVITY	GOMF_PHOSPHORIC_DIESTER_HYDROLASE_ACTIVITY		69	-0.518186	-1.8093	0	0.00411535	0.923	2601	tags=32%, list=19%, signal=39%
GOBP_MESONEPHROS_DEVELOPMENT	GOBP_MESONEPHROS_DEVELOPMENT		89	-0.497041	-1.80955	0	0.0041158	0.923	2971	tags=36%, list=22%, signal=46%
GOMF_PROTEIN_KINASE_A_BINDING	GOMF_PROTEIN_KINASE_A_BINDING		48	-0.558762	-1.8079	0	0.0041832	0.926	3277	tags=50%, list=24%, signal=66%
GOBP_EXTRACELLULAR_MATRIX_DISASSEMBLY	GOBP_EXTRACELLULAR_MATRIX_DISASSEMBLY		27	-0.621929	-1.80708	0.00400802	0.00419702	0.928	1100	tags=30%, list=8%, signal=32%
GOBP_REGULATION_OF_CELL_SHAPE	GOBP_REGULATION_OF_CELL_SHAPE		136	-0.461187	-1.80743	0	0.00419733	0.927	3938	tags=48%, list=29%, signal=67%
GOBP_REGULATION_OF_BONE_MINERALIZATION	GOBP_REGULATION_OF_BONE_MINERALIZATION		61	-0.521509	-1.8071	0	0.00419772	0.928	3481	tags=46%, list=26%, signal=61%
GOBP_POSITIVE_REGULATION_OF_NEURON_DIFFERENTIATION	GOBP_POSITIVE_REGULATION_OF_NEURON_DIFFERENTIATION		82	-0.507351	-1.80718	0	0.00419838	0.927	3941	tags=55%, list=29%, signal=77%
GOBP_PROTEOGLYCAN_METABOLIC_PROCESS	GOBP_PROTEOGLYCAN_METABOLIC_PROCESS		77	-0.496896	-1.80617	0	0.00422891	0.929	2560	tags=25%, list=19%, signal=30%
GOMF_SH3_DOMAIN_BINDING	GOMF_SH3_DOMAIN_BINDING		123	-0.469765	-1.80584	0	0.00424289	0.93	3044	tags=41%, list=22%, signal=53%
GOBP_POSITIVE_REGULATION_OF_SODIUM_ION_TRANSMEMBRANE_TRANSPORTER_ACTIVITY	GOBP_POSITIVE_REGULATION_OF_SODIUM_ION_TRANSMEMBRANE_TRANSPORTER_ACTIVITY		16	-0.70248	-1.80537	0.00376648	0.00426334	0.932	1873	tags=44%, list=14%, signal=51%
GOBP_NEGATIVE_REGULATION_OF_CARTILAGE_DEVELOPMENT	GOBP_NEGATIVE_REGULATION_OF_CARTILAGE_DEVELOPMENT		27	-0.620019	-1.8048	0	0.00428537	0.932	2681	tags=52%, list=20%, signal=64%
GOBP_MESENCHYMAL_CELL_MIGRATION	GOBP_MESENCHYMAL_CELL_MIGRATION		57	-0.528201	-1.80471	0	0.00428774	0.933	4011	tags=56%, list=30%, signal=79%
GOBP_REGULATION_OF_PROTEIN_LOCALIZATION_TO_MEMBRANE	GOBP_REGULATION_OF_PROTEIN_LOCALIZATION_TO_MEMBRANE		170	-0.453752	-1.80458	0	0.0042886	0.933	3382	tags=40%, list=25%, signal=53%
GOBP_SENSORY_PERCEPTION_OF_CHEMICAL_STIMULUS	GOBP_SENSORY_PERCEPTION_OF_CHEMICAL_STIMULUS		38	-0.570141	-1.80369	0	0.00432988	0.934	2709	tags=47%, list=20%, signal=59%
GOBP_POSITIVE_REGULATION_OF_DEVELOPMENTAL_GROWTH	GOBP_POSITIVE_REGULATION_OF_DEVELOPMENTAL_GROWTH		168	-0.451042	-1.80339	0	0.00435322	0.936	3251	tags=43%, list=24%, signal=56%
GOBP_FEEDING_BEHAVIOR	GOBP_FEEDING_BEHAVIOR		72	-0.512508	-1.80312	0	0.00435878	0.936	2432	tags=36%, list=18%, signal=44%
GOBP_FEAR_RESPONSE	GOBP_FEAR_RESPONSE		43	-0.561226	-1.80146	0	0.0044608	0.942	2104	tags=40%, list=16%, signal=47%
GOBP_ESTABLISHMENT_OF_ENDOTHELIAL_BARRIER	GOBP_ESTABLISHMENT_OF_ENDOTHELIAL_BARRIER		49	-0.541729	-1.80072	0.00189753	0.0044625	0.944	3388	tags=37%, list=25%, signal=49%
GOBP_SYNAPTIC_VESICLE_MEMBRANE_ORGANIZATION	GOBP_SYNAPTIC_VESICLE_MEMBRANE_ORGANIZATION		26	-0.625329	-1.80128	0.00559702	0.0044631	0.942	1865	tags=46%, list=14%, signal=53%
GOBP_REGULATION_OF_VASOCONSTRICTION	GOBP_REGULATION_OF_VASOCONSTRICTION		62	-0.519579	-1.80079	0	0.00446347	0.944	2016	tags=35%, list=15%, signal=41%
GOBP_INOSITOL_PHOSPHATE_METABOLIC_PROCESS	GOBP_INOSITOL_PHOSPHATE_METABOLIC_PROCESS		45	-0.554359	-1.80082	0	0.00446925	0.944	3796	tags=47%, list=28%, signal=65%
GOCC_PLASMA_MEMBRANE_BOUNDED_CELL_PROJECTION_CYTOPLASM	GOCC_PLASMA_MEMBRANE_BOUNDED_CELL_PROJECTION_CYTOPLASM		97	-0.487688	-1.80084	0	0.00447505	0.944	2396	tags=33%, list=18%, signal=40%
GOBP_ACTIN_CYTOSKELETON_REORGANIZATION	GOBP_ACTIN_CYTOSKELETON_REORGANIZATION		102	-0.481586	-1.79948	0	0.00451583	0.947	2224	tags=25%, list=16%, signal=30%
GOBP_OSTEOBLAST_PROLIFERATION	GOBP_OSTEOBLAST_PROLIFERATION		34	-0.587235	-1.79978	0.00186916	0.00451633	0.947	3586	tags=53%, list=26%, signal=72%
GOMF_CALCIUM_CHANNEL_REGULATOR_ACTIVITY	GOMF_CALCIUM_CHANNEL_REGULATOR_ACTIVITY		31	-0.597758	-1.79957	0	0.00451684	0.947	1751	tags=42%, list=13%, signal=48%
GOMF_WNT_PROTEIN_BINDING	GOMF_WNT_PROTEIN_BINDING		26	-0.628741	-1.79984	0.00194932	0.00451739	0.947	4233	tags=73%, list=31%, signal=106%
GOBP_CELL_FATE_COMMITMENT	GOBP_CELL_FATE_COMMITMENT		179	-0.445073	-1.79919	0	0.00451794	0.947	4063	tags=43%, list=30%, signal=61%
GOBP_NEGATIVE_REGULATION_OF_FAT_CELL_DIFFERENTIATION	GOBP_NEGATIVE_REGULATION_OF_FAT_CELL_DIFFERENTIATION		49	-0.546781	-1.79814	0.00182482	0.00457415	0.948	3469	tags=51%, list=26%, signal=68%
GOBP_CARDIAC_MUSCLE_CELL_MEMBRANE_REPOLARIZATION	GOBP_CARDIAC_MUSCLE_CELL_MEMBRANE_REPOLARIZATION		24	-0.64498	-1.79765	0.00378072	0.00459679	0.949	1720	tags=42%, list=13%, signal=48%
GOBP_REGULATION_OF_CYTOSKELETON_ORGANIZATION	GOBP_REGULATION_OF_CYTOSKELETON_ORGANIZATION		456	-0.407145	-1.79734	0	0.00461154	0.949	2713	tags=32%, list=20%, signal=39%
GOMF_PHOSPHOLIPASE_C_ACTIVITY	GOMF_PHOSPHOLIPASE_C_ACTIVITY		16	-0.70665	-1.79692	0.00581395	0.00463571	0.95	1762	tags=31%, list=13%, signal=36%
GOBP_VASCULAR_PROCESS_IN_CIRCULATORY_SYSTEM	GOBP_VASCULAR_PROCESS_IN_CIRCULATORY_SYSTEM		183	-0.44085	-1.79663	0	0.00463928	0.95	2466	tags=30%, list=18%, signal=36%
GOBP_REGULATION_OF_RECEPTOR_CLUSTERING	GOBP_REGULATION_OF_RECEPTOR_CLUSTERING		17	-0.692925	-1.79607	0.00393701	0.00466807	0.951	3166	tags=65%, list=23%, signal=84%
GOBP_MULTICELLULAR_ORGANISMAL_MOVEMENT	GOBP_MULTICELLULAR_ORGANISMAL_MOVEMENT		35	-0.585723	-1.79594	0.00191571	0.00467007	0.951	1633	tags=26%, list=12%, signal=29%
GOBP_VASCULAR_ENDOTHELIAL_GROWTH_FACTOR_SIGNALING_PATHWAY	GOBP_VASCULAR_ENDOTHELIAL_GROWTH_FACTOR_SIGNALING_PATHWAY		35	-0.582062	-1.79572	0	0.00467986	0.952	2406	tags=46%, list=18%, signal=55%
GOBP_POSITIVE_REGULATION_OF_CALCIUM_ION_TRANSMEMBRANE_TRANSPORTER_ACTIVITY	GOBP_POSITIVE_REGULATION_OF_CALCIUM_ION_TRANSMEMBRANE_TRANSPORTER_ACTIVITY		40	-0.572729	-1.79382	0.0018797	0.00477777	0.955	3633	tags=55%, list=27%, signal=75%
GOBP_REGULATION_OF_OSTEOBLAST_DIFFERENTIATION	GOBP_REGULATION_OF_OSTEOBLAST_DIFFERENTIATION		125	-0.463608	-1.79343	0	0.00479671	0.957	3010	tags=42%, list=22%, signal=54%
GOBP_RESPONSE_TO_ACETYLCHOLINE	GOBP_RESPONSE_TO_ACETYLCHOLINE		26	-0.621478	-1.79326	0.00373134	0.00479849	0.957	994	tags=42%, list=7%, signal=46%
GOBP_MICROTUBULE_DEPOLYMERIZATION	GOBP_MICROTUBULE_DEPOLYMERIZATION		46	-0.559188	-1.79231	0	0.00486431	0.959	1104	tags=41%, list=8%, signal=45%
GOBP_ORGAN_GROWTH	GOBP_ORGAN_GROWTH		164	-0.449139	-1.7921	0	0.00486911	0.959	4011	tags=51%, list=30%, signal=72%
GOBP_PEPTIDE_TRANSPORT	GOBP_PEPTIDE_TRANSPORT		236	-0.42967	-1.79159	0	0.00490193	0.96	2465	tags=29%, list=18%, signal=35%
GOBP_EPITHELIAL_TUBE_MORPHOGENESIS	GOBP_EPITHELIAL_TUBE_MORPHOGENESIS		329	-0.412759	-1.79077	0	0.00494096	0.961	3586	tags=40%, list=26%, signal=52%
GOMF_PROTEOGLYCAN_BINDING	GOMF_PROTEOGLYCAN_BINDING		32	-0.600338	-1.79055	0	0.00494414	0.962	2313	tags=38%, list=17%, signal=45%
GOBP_DENDRITE_EXTENSION	GOBP_DENDRITE_EXTENSION		33	-0.600377	-1.79065	0.00193424	0.00494568	0.962	2783	tags=58%, list=21%, signal=72%
GOBP_ENDODERM_DEVELOPMENT	GOBP_ENDODERM_DEVELOPMENT		54	-0.528863	-1.79014	0	0.00495659	0.962	2897	tags=35%, list=21%, signal=45%
GOBP_CARTILAGE_DEVELOPMENT_INVOLVED_IN_ENDOCHONDRAL_BONE_MORPHOGENESIS	GOBP_CARTILAGE_DEVELOPMENT_INVOLVED_IN_ENDOCHONDRAL_BONE_MORPHOGENESIS		32	-0.586944	-1.79028	0.00373832	0.00495816	0.962	3463	tags=59%, list=26%, signal=80%
GOCC_SARCOPLASMIC_RETICULUM_MEMBRANE	GOCC_SARCOPLASMIC_RETICULUM_MEMBRANE		15	-0.702668	-1.78912	0	0.00500311	0.962	3633	tags=87%, list=27%, signal=118%
GOBP_REGULATION_OF_CARDIAC_MUSCLE_CELL_MEMBRANE_REPOLARIZATION	GOBP_REGULATION_OF_CARDIAC_MUSCLE_CELL_MEMBRANE_REPOLARIZATION		20	-0.667227	-1.78902	0.00191939	0.00500609	0.962	1720	tags=45%, list=13%, signal=51%
GOBP_POTASSIUM_ION_HOMEOSTASIS	GOBP_POTASSIUM_ION_HOMEOSTASIS		24	-0.627894	-1.78843	0.0020202	0.00502149	0.962	1733	tags=38%, list=13%, signal=43%
GOBP_GASTRULATION	GOBP_GASTRULATION		138	-0.458001	-1.78859	0	0.00502624	0.962	3743	tags=42%, list=28%, signal=57%
GOBP_SYNAPTIC_VESICLE_TRANSPORT	GOBP_SYNAPTIC_VESICLE_TRANSPORT		42	-0.564789	-1.78761	0	0.00505366	0.963	1988	tags=36%, list=15%, signal=42%
GOCC_POSTSYNAPTIC_CYTOSKELETON	GOCC_POSTSYNAPTIC_CYTOSKELETON		18	-0.678741	-1.78771	0.00389105	0.00505531	0.963	1943	tags=61%, list=14%, signal=71%
GOBP_CELL_RECOGNITION	GOBP_CELL_RECOGNITION		101	-0.477544	-1.78739	0	0.00507035	0.965	1143	tags=24%, list=8%, signal=26%
GOBP_CARBOHYDRATE_HOMEOSTASIS	GOBP_CARBOHYDRATE_HOMEOSTASIS		217	-0.434193	-1.78727	0	0.00507331	0.965	2465	tags=29%, list=18%, signal=34%
GOCC_COMPLEX_OF_COLLAGEN_TRIMERS	GOCC_COMPLEX_OF_COLLAGEN_TRIMERS		15	-0.70731	-1.78688	0.00395257	0.00509315	0.966	3455	tags=87%, list=25%, signal=116%
GOCC_EXTRINSIC_COMPONENT_OF_MEMBRANE	GOCC_EXTRINSIC_COMPONENT_OF_MEMBRANE		276	-0.426466	-1.78666	0	0.00510227	0.966	2868	tags=35%, list=21%, signal=43%
GOBP_NEGATIVE_REGULATION_OF_RESPONSE_TO_WOUNDING	GOBP_NEGATIVE_REGULATION_OF_RESPONSE_TO_WOUNDING		68	-0.510396	-1.78643	0	0.00511124	0.966	3224	tags=37%, list=24%, signal=48%
GOBP_REGULATION_OF_SUPRAMOLECULAR_FIBER_ORGANIZATION	GOBP_REGULATION_OF_SUPRAMOLECULAR_FIBER_ORGANIZATION		322	-0.415938	-1.78608	0	0.00513087	0.966	2184	tags=28%, list=16%, signal=33%
GOBP_VASOCONSTRICTION	GOBP_VASOCONSTRICTION		78	-0.498659	-1.78541	0	0.00516539	0.966	2016	tags=33%, list=15%, signal=39%
GOBP_ADENYLATE_CYCLASE_ACTIVATING_ADRENERGIC_RECEPTOR_SIGNALING_PATHWAY	GOBP_ADENYLATE_CYCLASE_ACTIVATING_ADRENERGIC_RECEPTOR_SIGNALING_PATHWAY		16	-0.678526	-1.78548	0.00579151	0.00516875	0.966	2661	tags=63%, list=20%, signal=78%
GOBP_POSITIVE_REGULATION_OF_LONG_TERM_SYNAPTIC_POTENTIATION	GOBP_POSITIVE_REGULATION_OF_LONG_TERM_SYNAPTIC_POTENTIATION		25	-0.624488	-1.78461	0	0.00519032	0.968	2977	tags=60%, list=22%, signal=77%
GOBP_CRANIAL_NERVE_MORPHOGENESIS	GOBP_CRANIAL_NERVE_MORPHOGENESIS		23	-0.631352	-1.78467	0.0052356	0.00519516	0.967	2225	tags=43%, list=16%, signal=52%
GOBP_OSTEOBLAST_DIFFERENTIATION	GOBP_OSTEOBLAST_DIFFERENTIATION		176	-0.441312	-1.78413	0	0.00519757	0.968	3954	tags=47%, list=29%, signal=66%
GOBP_SEMAPHORIN_PLEXIN_SIGNALING_PATHWAY_INVOLVED_IN_NEURON_PROJECTION_GUIDANCE	GOBP_SEMAPHORIN_PLEXIN_SIGNALING_PATHWAY_INVOLVED_IN_NEURON_PROJECTION_GUIDANCE		17	-0.672252	-1.78476	0.00391389	0.0051985	0.967	1922	tags=47%, list=14%, signal=55%
GOBP_POSITIVE_REGULATION_OF_PHOSPHATIDYLINOSITOL_3_KINASE_SIGNALING	GOBP_POSITIVE_REGULATION_OF_PHOSPHATIDYLINOSITOL_3_KINASE_SIGNALING		58	-0.528362	-1.78402	0.00190114	0.00520176	0.968	3003	tags=45%, list=22%, signal=57%
GOBP_REGULATION_OF_ANIMAL_ORGAN_FORMATION	GOBP_REGULATION_OF_ANIMAL_ORGAN_FORMATION		22	-0.644798	-1.78388	0.0019305	0.00520293	0.968	1960	tags=36%, list=14%, signal=42%
GOMF_SIGNALING_RECEPTOR_COMPLEX_ADAPTOR_ACTIVITY	GOMF_SIGNALING_RECEPTOR_COMPLEX_ADAPTOR_ACTIVITY		36	-0.571377	-1.78326	0.00183824	0.00523588	0.97	2548	tags=44%, list=19%, signal=55%
GOMF_PROTEIN_KINASE_C_ACTIVITY	GOMF_PROTEIN_KINASE_C_ACTIVITY		17	-0.679211	-1.78296	0.00394477	0.00525356	0.97	4360	tags=88%, list=32%, signal=130%
GOBP_POSITIVE_REGULATION_OF_ADENYLATE_CYCLASE_ACTIVITY	GOBP_POSITIVE_REGULATION_OF_ADENYLATE_CYCLASE_ACTIVITY		20	-0.66138	-1.78274	0.00200803	0.00525583	0.971	2565	tags=50%, list=19%, signal=62%
GOCC_CYTOSOLIC_REGION	GOCC_CYTOSOLIC_REGION		37	-0.570055	-1.7828	0	0.00525919	0.971	2466	tags=49%, list=18%, signal=59%
GOBP_POSITIVE_REGULATION_OF_REGULATED_SECRETORY_PATHWAY	GOBP_POSITIVE_REGULATION_OF_REGULATED_SECRETORY_PATHWAY		44	-0.553599	-1.78259	0.00183486	0.00525993	0.971	2001	tags=34%, list=15%, signal=40%
GOBP_BRANCHING_MORPHOGENESIS_OF_AN_EPITHELIAL_TUBE	GOBP_BRANCHING_MORPHOGENESIS_OF_AN_EPITHELIAL_TUBE		165	-0.446302	-1.78243	0	0.00526999	0.972	3991	tags=46%, list=29%, signal=64%
GOBP_REGULATION_OF_BLOOD_PRESSURE	GOBP_REGULATION_OF_BLOOD_PRESSURE		146	-0.449404	-1.78206	0	0.00529313	0.973	3183	tags=42%, list=23%, signal=54%
GOBP_SLEEP	GOBP_SLEEP		19	-0.655332	-1.78213	0	0.00529354	0.973	2225	tags=47%, list=16%, signal=57%
GOBP_NEGATIVE_REGULATION_OF_G_PROTEIN_COUPLED_RECEPTOR_SIGNALING_PATHWAY	GOBP_NEGATIVE_REGULATION_OF_G_PROTEIN_COUPLED_RECEPTOR_SIGNALING_PATHWAY		44	-0.548516	-1.7804	0.00185185	0.00538881	0.975	3772	tags=55%, list=28%, signal=75%
GOBP_SIGNALING_RECEPTOR_LIGAND_PRECURSOR_PROCESSING	GOBP_SIGNALING_RECEPTOR_LIGAND_PRECURSOR_PROCESSING		21	-0.662321	-1.7803	0.00736648	0.00539581	0.975	1432	tags=33%, list=11%, signal=37%
GOBP_PHOTORECEPTOR_CELL_DEVELOPMENT	GOBP_PHOTORECEPTOR_CELL_DEVELOPMENT		36	-0.569926	-1.77996	0	0.00540356	0.975	3980	tags=58%, list=29%, signal=82%
GOBP_PROSTATE_GLAND_DEVELOPMENT	GOBP_PROSTATE_GLAND_DEVELOPMENT		43	-0.5535	-1.78009	0.00192678	0.00540566	0.975	2577	tags=40%, list=19%, signal=49%
GOBP_PHOSPHATIDYLINOSITOL_DEPHOSPHORYLATION	GOBP_PHOSPHATIDYLINOSITOL_DEPHOSPHORYLATION		26	-0.612907	-1.77961	0.00588235	0.00543267	0.975	4181	tags=54%, list=31%, signal=78%
GOCC_ANCHORED_COMPONENT_OF_MEMBRANE	GOCC_ANCHORED_COMPONENT_OF_MEMBRANE		121	-0.460694	-1.77932	0	0.00544541	0.975	2617	tags=29%, list=19%, signal=36%
GOBP_POSITIVE_REGULATION_OF_BONE_MINERALIZATION	GOBP_POSITIVE_REGULATION_OF_BONE_MINERALIZATION		35	-0.584234	-1.77846	0.00204082	0.00549967	0.977	3481	tags=54%, list=26%, signal=73%
GOBP_REGULATION_OF_CARDIAC_MUSCLE_CELL_ACTION_POTENTIAL	GOBP_REGULATION_OF_CARDIAC_MUSCLE_CELL_ACTION_POTENTIAL		24	-0.63795	-1.77814	0.00181818	0.00552276	0.978	2935	tags=50%, list=22%, signal=64%
GOBP_REGULATION_OF_ALTERNATIVE_MRNA_SPLICING_VIA_SPLICEOSOME	GOBP_REGULATION_OF_ALTERNATIVE_MRNA_SPLICING_VIA_SPLICEOSOME		56	-0.528464	-1.77796	0.00189036	0.00552944	0.978	2849	tags=46%, list=21%, signal=59%
GOBP_NEGATIVE_REGULATION_OF_ION_TRANSMEMBRANE_TRANSPORT	GOBP_NEGATIVE_REGULATION_OF_ION_TRANSMEMBRANE_TRANSPORT		90	-0.482686	-1.77665	0	0.00558636	0.979	3274	tags=43%, list=24%, signal=57%
GOCC_EXTRINSIC_COMPONENT_OF_PLASMA_MEMBRANE	GOCC_EXTRINSIC_COMPONENT_OF_PLASMA_MEMBRANE		150	-0.449204	-1.77672	0	0.00559008	0.979	2396	tags=33%, list=18%, signal=39%
GOBP_RESPONSE_TO_ORGANOPHOSPHORUS	GOBP_RESPONSE_TO_ORGANOPHOSPHORUS		70	-0.509084	-1.77684	0	0.00559088	0.979	2308	tags=33%, list=17%, signal=39%
GOMF_MYOSIN_BINDING	GOMF_MYOSIN_BINDING		64	-0.509723	-1.77388	0	0.00577133	0.982	2967	tags=44%, list=22%, signal=56%
GOBP_ADRENERGIC_RECEPTOR_SIGNALING_PATHWAY	GOBP_ADRENERGIC_RECEPTOR_SIGNALING_PATHWAY		22	-0.641063	-1.77354	0.00198413	0.00578511	0.982	3082	tags=55%, list=23%, signal=70%
GOBP_CEREBRAL_CORTEX_DEVELOPMENT	GOBP_CEREBRAL_CORTEX_DEVELOPMENT		89	-0.481266	-1.77337	0	0.00579435	0.982	2781	tags=43%, list=20%, signal=53%
GOBP_EMBRYONIC_HINDLIMB_MORPHOGENESIS	GOBP_EMBRYONIC_HINDLIMB_MORPHOGENESIS		23	-0.620658	-1.77281	0	0.00582862	0.982	3201	tags=52%, list=24%, signal=68%
GOBP_LONG_TERM_SYNAPTIC_DEPRESSION	GOBP_LONG_TERM_SYNAPTIC_DEPRESSION		29	-0.606723	-1.77231	0.00182815	0.00585992	0.983	2052	tags=52%, list=15%, signal=61%
GOBP_PHOSPHATIDYLINOSITOL_PHOSPHATE_BIOSYNTHETIC_PROCESS	GOBP_PHOSPHATIDYLINOSITOL_PHOSPHATE_BIOSYNTHETIC_PROCESS		48	-0.541491	-1.77115	0	0.00594573	0.984	3129	tags=44%, list=23%, signal=57%
GOBP_HINDLIMB_MORPHOGENESIS	GOBP_HINDLIMB_MORPHOGENESIS		30	-0.598779	-1.77124	0.00383877	0.00594835	0.984	3995	tags=53%, list=29%, signal=75%
GOBP_VESICLE_CYTOSKELETAL_TRAFFICKING	GOBP_VESICLE_CYTOSKELETAL_TRAFFICKING		65	-0.51431	-1.77064	0.00189753	0.00597089	0.984	2924	tags=40%, list=22%, signal=51%
GOBP_VENTRICULAR_CARDIAC_MUSCLE_CELL_ACTION_POTENTIAL	GOBP_VENTRICULAR_CARDIAC_MUSCLE_CELL_ACTION_POTENTIAL		24	-0.613968	-1.76919	0.00377358	0.00607649	0.985	2935	tags=46%, list=22%, signal=58%
GOBP_STRIATED_MUSCLE_CELL_DEVELOPMENT	GOBP_STRIATED_MUSCLE_CELL_DEVELOPMENT		46	-0.540768	-1.76907	0.00188679	0.00607666	0.985	2741	tags=48%, list=20%, signal=60%
GOBP_RESPONSE_TO_TRANSFORMING_GROWTH_FACTOR_BETA	GOBP_RESPONSE_TO_TRANSFORMING_GROWTH_FACTOR_BETA		213	-0.429364	-1.76928	0	0.00607782	0.984	3799	tags=43%, list=28%, signal=59%
GOBP_POSITIVE_REGULATION_OF_SMOOTH_MUSCLE_CELL_MIGRATION	GOBP_POSITIVE_REGULATION_OF_SMOOTH_MUSCLE_CELL_MIGRATION		59	-0.518855	-1.76869	0	0.00610155	0.986	2568	tags=32%, list=19%, signal=40%
GOCC_APICOLATERAL_PLASMA_MEMBRANE	GOCC_APICOLATERAL_PLASMA_MEMBRANE		20	-0.65079	-1.76835	0	0.00610609	0.986	401	tags=15%, list=3%, signal=15%
GOBP_POSITIVE_REGULATION_OF_SODIUM_ION_TRANSMEMBRANE_TRANSPORT	GOBP_POSITIVE_REGULATION_OF_SODIUM_ION_TRANSMEMBRANE_TRANSPORT		22	-0.643031	-1.76844	0.00197628	0.00611041	0.986	2967	tags=55%, list=22%, signal=70%
GOBP_MORPHOGENESIS_OF_A_POLARIZED_EPITHELIUM	GOBP_MORPHOGENESIS_OF_A_POLARIZED_EPITHELIUM		80	-0.496817	-1.76733	0	0.00614107	0.986	2874	tags=39%, list=21%, signal=49%
GOMF_CELL_ADHESION_MEDIATOR_ACTIVITY	GOMF_CELL_ADHESION_MEDIATOR_ACTIVITY		35	-0.570688	-1.7674	0	0.00614539	0.986	1397	tags=40%, list=10%, signal=44%
GOBP_NEGATIVE_REGULATION_OF_ACTIN_FILAMENT_BUNDLE_ASSEMBLY	GOBP_NEGATIVE_REGULATION_OF_ACTIN_FILAMENT_BUNDLE_ASSEMBLY		34	-0.58083	-1.76761	0.00184843	0.00614676	0.986	2486	tags=38%, list=18%, signal=47%
GOBP_REGULATION_OF_CALCIUM_MEDIATED_SIGNALING	GOBP_REGULATION_OF_CALCIUM_MEDIATED_SIGNALING		61	-0.520569	-1.76743	0	0.0061497	0.986	2642	tags=34%, list=19%, signal=43%
GOBP_NEUROTRANSMITTER_RECEPTOR_TRANSPORT	GOBP_NEUROTRANSMITTER_RECEPTOR_TRANSPORT		23	-0.633416	-1.76765	0	0.00615252	0.986	2415	tags=48%, list=18%, signal=58%
GOBP_NOTCH_SIGNALING_PATHWAY	GOBP_NOTCH_SIGNALING_PATHWAY		144	-0.457061	-1.76693	0	0.0061598	0.986	3124	tags=38%, list=23%, signal=49%
GOBP_NEGATIVE_REGULATION_OF_ACTIN_FILAMENT_DEPOLYMERIZATION	GOBP_NEGATIVE_REGULATION_OF_ACTIN_FILAMENT_DEPOLYMERIZATION		39	-0.566873	-1.76618	0.00198807	0.00619878	0.986	2184	tags=36%, list=16%, signal=43%
GOCC_BASOLATERAL_PLASMA_MEMBRANE	GOCC_BASOLATERAL_PLASMA_MEMBRANE		174	-0.440935	-1.76553	0	0.00625332	0.986	1417	tags=17%, list=10%, signal=19%
GOBP_METANEPHROS_DEVELOPMENT	GOBP_METANEPHROS_DEVELOPMENT		65	-0.511538	-1.76522	0	0.00625896	0.986	2155	tags=31%, list=16%, signal=36%
GOBP_STRIATED_MUSCLE_CELL_PROLIFERATION	GOBP_STRIATED_MUSCLE_CELL_PROLIFERATION		64	-0.511205	-1.764	0	0.00632909	0.986	3003	tags=47%, list=22%, signal=60%
GOBP_BRANCHING_INVOLVED_IN_BLOOD_VESSEL_MORPHOGENESIS	GOBP_BRANCHING_INVOLVED_IN_BLOOD_VESSEL_MORPHOGENESIS		37	-0.566829	-1.76405	0.00364964	0.00633353	0.986	3547	tags=54%, list=26%, signal=73%
GOBP_REGULATION_OF_POSTSYNAPTIC_NEUROTRANSMITTER_RECEPTOR_INTERNALIZATION	GOBP_REGULATION_OF_POSTSYNAPTIC_NEUROTRANSMITTER_RECEPTOR_INTERNALIZATION		21	-0.640076	-1.76408	0.003861	0.00634088	0.986	3315	tags=67%, list=24%, signal=88%
GOBP_POSTSYNAPTIC_DENSITY_ASSEMBLY	GOBP_POSTSYNAPTIC_DENSITY_ASSEMBLY		17	-0.677009	-1.76337	0.00588235	0.00635895	0.986	3362	tags=82%, list=25%, signal=109%
GOCC_SECRETORY_GRANULE	GOCC_SECRETORY_GRANULE		243	-0.421368	-1.76322	0	0.00636162	0.986	1865	tags=24%, list=14%, signal=28%
GOBP_CELLULAR_RESPONSE_TO_CARBOHYDRATE_STIMULUS	GOBP_CELLULAR_RESPONSE_TO_CARBOHYDRATE_STIMULUS		129	-0.461407	-1.7631	0	0.00636853	0.986	2607	tags=34%, list=19%, signal=42%
GOBP_NEGATIVE_REGULATION_OF_BMP_SIGNALING_PATHWAY	GOBP_NEGATIVE_REGULATION_OF_BMP_SIGNALING_PATHWAY		41	-0.556853	-1.76288	0.00570342	0.00638546	0.986	4856	tags=66%, list=36%, signal=102%
GOBP_REGULATION_OF_CELLULAR_RESPONSE_TO_VASCULAR_ENDOTHELIAL_GROWTH_FACTOR_STIMULUS	GOBP_REGULATION_OF_CELLULAR_RESPONSE_TO_VASCULAR_ENDOTHELIAL_GROWTH_FACTOR_STIMULUS		19	-0.660439	-1.76208	0	0.00643941	0.986	2210	tags=58%, list=16%, signal=69%
GOBP_CELL_MIGRATION_INVOLVED_IN_SPROUTING_ANGIOGENESIS	GOBP_CELL_MIGRATION_INVOLVED_IN_SPROUTING_ANGIOGENESIS		50	-0.531849	-1.76165	0	0.00646471	0.986	3382	tags=48%, list=25%, signal=64%
GOBP_SKELETAL_MUSCLE_ORGAN_DEVELOPMENT	GOBP_SKELETAL_MUSCLE_ORGAN_DEVELOPMENT		141	-0.448573	-1.75995	0	0.00659517	0.987	2959	tags=35%, list=22%, signal=44%
GOCC_CORTICAL_ACTIN_CYTOSKELETON	GOCC_CORTICAL_ACTIN_CYTOSKELETON		72	-0.498793	-1.75774	0	0.00677367	0.99	2184	tags=28%, list=16%, signal=33%
GOBP_POSITIVE_REGULATION_OF_PLASMA_MEMBRANE_BOUNDED_CELL_PROJECTION_ASSEMBLY	GOBP_POSITIVE_REGULATION_OF_PLASMA_MEMBRANE_BOUNDED_CELL_PROJECTION_ASSEMBLY		93	-0.473729	-1.75751	0.00185529	0.00678152	0.991	3623	tags=43%, list=27%, signal=58%
GOMF_GUANYL_NUCLEOTIDE_EXCHANGE_FACTOR_ACTIVITY	GOMF_GUANYL_NUCLEOTIDE_EXCHANGE_FACTOR_ACTIVITY		187	-0.434451	-1.75696	0	0.00680913	0.991	3427	tags=49%, list=25%, signal=64%
GOBP_MUSCLE_CELL_PROLIFERATION	GOBP_MUSCLE_CELL_PROLIFERATION		218	-0.427187	-1.7564	0	0.00684371	0.991	3003	tags=37%, list=22%, signal=46%
GOMF_PROTEIN_KINASE_ACTIVITY	GOMF_PROTEIN_KINASE_ACTIVITY		470	-0.398635	-1.75578	0	0.00688808	0.991	3070	tags=33%, list=23%, signal=41%
GOBP_REPLACEMENT_OSSIFICATION	GOBP_REPLACEMENT_OSSIFICATION		28	-0.58864	-1.7549	0.011583	0.00694754	0.992	3481	tags=61%, list=26%, signal=81%
GOBP_ATRIAL_SEPTUM_DEVELOPMENT	GOBP_ATRIAL_SEPTUM_DEVELOPMENT		15	-0.693643	-1.75495	0.0094697	0.00694843	0.992	3331	tags=73%, list=25%, signal=97%
GOBP_NEGATIVE_REGULATION_OF_AXON_EXTENSION_INVOLVED_IN_AXON_GUIDANCE	GOBP_NEGATIVE_REGULATION_OF_AXON_EXTENSION_INVOLVED_IN_AXON_GUIDANCE		25	-0.624488	-1.75499	0.0037037	0.00695496	0.992	2719	tags=44%, list=20%, signal=55%
GOBP_ERK1_AND_ERK2_CASCADE	GOBP_ERK1_AND_ERK2_CASCADE		257	-0.416197	-1.75441	0	0.00697875	0.992	2616	tags=32%, list=19%, signal=38%
GOBP_TISSUE_MIGRATION	GOBP_TISSUE_MIGRATION		284	-0.417023	-1.75357	0	0.00703122	0.993	4099	tags=43%, list=30%, signal=60%
GOBP_AMINO_ACID_TRANSPORT	GOBP_AMINO_ACID_TRANSPORT		112	-0.462294	-1.75156	0	0.00719997	0.994	1795	tags=23%, list=13%, signal=27%
GOBP_SPINAL_CORD_DEVELOPMENT	GOBP_SPINAL_CORD_DEVELOPMENT		63	-0.506103	-1.75055	0	0.0072815	0.994	3746	tags=46%, list=28%, signal=63%
GOBP_STRESS_FIBER_ASSEMBLY	GOBP_STRESS_FIBER_ASSEMBLY		106	-0.460794	-1.74744	0	0.0075659	0.995	3724	tags=43%, list=27%, signal=59%
GOBP_TRANSMEMBRANE_RECEPTOR_PROTEIN_SERINE_THREONINE_KINASE_SIGNALING_PATHWAY	GOBP_TRANSMEMBRANE_RECEPTOR_PROTEIN_SERINE_THREONINE_KINASE_SIGNALING_PATHWAY		302	-0.411716	-1.74723	0	0.00757267	0.996	3812	tags=42%, list=28%, signal=57%
GOBP_REGULATION_OF_PHOSPHATIDYLINOSITOL_3_KINASE_SIGNALING	GOBP_REGULATION_OF_PHOSPHATIDYLINOSITOL_3_KINASE_SIGNALING		78	-0.490699	-1.74638	0	0.00764509	0.996	3444	tags=49%, list=25%, signal=65%
GOBP_NEGATIVE_REGULATION_OF_SMOOTHENED_SIGNALING_PATHWAY	GOBP_NEGATIVE_REGULATION_OF_SMOOTHENED_SIGNALING_PATHWAY		33	-0.583398	-1.74594	0.00191205	0.0076851	0.997	3947	tags=58%, list=29%, signal=81%
GOMF_AMYLOID_BETA_BINDING	GOMF_AMYLOID_BETA_BINDING		55	-0.516115	-1.74538	0.0018797	0.00772777	0.997	1932	tags=36%, list=14%, signal=42%
GOBP_AMIDE_TRANSPORT	GOBP_AMIDE_TRANSPORT		258	-0.413656	-1.74517	0	0.00773403	0.997	2465	tags=28%, list=18%, signal=33%
GOBP_POSITIVE_REGULATION_OF_PROTEIN_LOCALIZATION_TO_MEMBRANE	GOBP_POSITIVE_REGULATION_OF_PROTEIN_LOCALIZATION_TO_MEMBRANE		97	-0.466902	-1.74539	0	0.00773508	0.997	2922	tags=33%, list=22%, signal=42%
GOMF_POTASSIUM_CHANNEL_REGULATOR_ACTIVITY	GOMF_POTASSIUM_CHANNEL_REGULATOR_ACTIVITY		40	-0.565749	-1.74518	0	0.00774133	0.997	2161	tags=43%, list=16%, signal=50%
GOBP_PEPTIDE_HORMONE_PROCESSING	GOBP_PEPTIDE_HORMONE_PROCESSING		17	-0.670609	-1.74453	0.0056391	0.00778494	0.997	1432	tags=35%, list=11%, signal=39%
GOBP_AORTIC_VALVE_DEVELOPMENT	GOBP_AORTIC_VALVE_DEVELOPMENT		24	-0.610293	-1.74343	0.00398406	0.00787613	0.997	2970	tags=46%, list=22%, signal=59%
GOBP_MELANOCYTE_DIFFERENTIATION	GOBP_MELANOCYTE_DIFFERENTIATION		25	-0.590279	-1.74298	0.00193798	0.00789274	0.997	3060	tags=52%, list=23%, signal=67%
GOBP_CELLULAR_RESPONSE_TO_CAMP	GOBP_CELLULAR_RESPONSE_TO_CAMP		31	-0.587675	-1.74315	0.00196078	0.00789512	0.997	851	tags=23%, list=6%, signal=24%
GOCC_MYOSIN_COMPLEX	GOCC_MYOSIN_COMPLEX		36	-0.553388	-1.74302	0	0.00789876	0.997	3559	tags=36%, list=26%, signal=49%
GOBP_REGULATION_OF_TUBE_SIZE	GOBP_REGULATION_OF_TUBE_SIZE		128	-0.45692	-1.74025	0	0.00813498	0.997	2179	tags=29%, list=16%, signal=34%
GOBP_CHLORIDE_TRANSMEMBRANE_TRANSPORT	GOBP_CHLORIDE_TRANSMEMBRANE_TRANSPORT		22	-0.63777	-1.73996	0.00197628	0.00814162	0.997	1128	tags=27%, list=8%, signal=30%
GOBP_REGULATION_OF_VASCULAR_ENDOTHELIAL_GROWTH_FACTOR_RECEPTOR_SIGNALING_PATHWAY	GOBP_REGULATION_OF_VASCULAR_ENDOTHELIAL_GROWTH_FACTOR_RECEPTOR_SIGNALING_PATHWAY		28	-0.604614	-1.73998	0.00198807	0.00814932	0.997	3138	tags=50%, list=23%, signal=65%
GOBP_RESPIRATORY_GASEOUS_EXCHANGE_BY_RESPIRATORY_SYSTEM	GOBP_RESPIRATORY_GASEOUS_EXCHANGE_BY_RESPIRATORY_SYSTEM		48	-0.533112	-1.73929	0	0.00817919	0.997	2244	tags=40%, list=17%, signal=47%
GOBP_ORGANELLE_TRANSPORT_ALONG_MICROTUBULE	GOBP_ORGANELLE_TRANSPORT_ALONG_MICROTUBULE		76	-0.486196	-1.73871	0	0.00821692	0.997	3822	tags=54%, list=28%, signal=75%
GOBP_RENAL_SYSTEM_VASCULATURE_DEVELOPMENT	GOBP_RENAL_SYSTEM_VASCULATURE_DEVELOPMENT		24	-0.614623	-1.73839	0.0040404	0.00823105	0.997	3495	tags=63%, list=26%, signal=84%
GOMF_LIPID_TRANSPORTER_ACTIVITY	GOMF_LIPID_TRANSPORTER_ACTIVITY		118	-0.451227	-1.73809	0	0.00826026	0.997	3222	tags=34%, list=24%, signal=44%
GOBP_POSITIVE_REGULATION_OF_SECRETION	GOBP_POSITIVE_REGULATION_OF_SECRETION		293	-0.410251	-1.73774	0	0.008295	0.998	3687	tags=39%, list=27%, signal=52%
GOBP_HOMOTYPIC_CELL_CELL_ADHESION	GOBP_HOMOTYPIC_CELL_CELL_ADHESION		66	-0.498296	-1.7375	0	0.00830489	0.998	3003	tags=33%, list=22%, signal=43%
GOBP_MESENCHYMAL_CELL_DIFFERENTIATION	GOBP_MESENCHYMAL_CELL_DIFFERENTIATION		206	-0.422357	-1.73727	0	0.00830959	0.998	4026	tags=49%, list=30%, signal=69%
GOCC_CILIUM	GOCC_CILIUM		380	-0.398237	-1.73708	0	0.00831325	0.998	3234	tags=32%, list=24%, signal=41%
GOMF_PROTEIN_SERINE_THREONINE_KINASE_ACTIVITY	GOMF_PROTEIN_SERINE_THREONINE_KINASE_ACTIVITY		359	-0.399923	-1.73715	0	0.00831547	0.998	3631	tags=41%, list=27%, signal=54%
GOMF_CYCLASE_ACTIVITY	GOMF_CYCLASE_ACTIVITY		15	-0.682549	-1.73727	0.00594059	0.00831876	0.998	2440	tags=53%, list=18%, signal=65%
GOBP_STEROID_HORMONE_SECRETION	GOBP_STEROID_HORMONE_SECRETION		22	-0.623846	-1.73633	0.00773694	0.00835977	0.998	2968	tags=50%, list=22%, signal=64%
GOBP_REGULATION_OF_PROTEIN_KINASE_C_SIGNALING	GOBP_REGULATION_OF_PROTEIN_KINASE_C_SIGNALING		17	-0.681115	-1.73606	0.00548446	0.00838605	0.998	2406	tags=41%, list=18%, signal=50%
GOBP_PERIPHERAL_NERVOUS_SYSTEM_DEVELOPMENT	GOBP_PERIPHERAL_NERVOUS_SYSTEM_DEVELOPMENT		63	-0.503167	-1.73498	0.00182815	0.0084787	0.999	3672	tags=43%, list=27%, signal=58%
GOBP_NEGATIVE_REGULATION_OF_PLASMA_MEMBRANE_BOUNDED_CELL_PROJECTION_ASSEMBLY	GOBP_NEGATIVE_REGULATION_OF_PLASMA_MEMBRANE_BOUNDED_CELL_PROJECTION_ASSEMBLY		31	-0.579078	-1.73503	0	0.00848662	0.999	3185	tags=48%, list=23%, signal=63%
GOBP_RENAL_TUBULE_DEVELOPMENT	GOBP_RENAL_TUBULE_DEVELOPMENT		86	-0.474308	-1.73472	0	0.00849901	0.999	2971	tags=36%, list=22%, signal=46%
GOBP_POSITIVE_REGULATION_OF_GLUCOSE_TRANSMEMBRANE_TRANSPORT	GOBP_POSITIVE_REGULATION_OF_GLUCOSE_TRANSMEMBRANE_TRANSPORT		39	-0.552515	-1.73456	0	0.00850996	0.999	3643	tags=46%, list=27%, signal=63%
GOBP_LYMPH_VESSEL_MORPHOGENESIS	GOBP_LYMPH_VESSEL_MORPHOGENESIS		22	-0.632431	-1.73427	0.00972763	0.00853834	0.999	2832	tags=55%, list=21%, signal=69%
GOBP_REGULATION_OF_MICROTUBULE_POLYMERIZATION	GOBP_REGULATION_OF_MICROTUBULE_POLYMERIZATION		50	-0.517889	-1.73223	0.00179533	0.00870582	0.999	2713	tags=44%, list=20%, signal=55%
GOBP_REGULATION_OF_RESPONSE_TO_WOUNDING	GOBP_REGULATION_OF_RESPONSE_TO_WOUNDING		135	-0.444064	-1.73197	0	0.00872198	0.999	2755	tags=32%, list=20%, signal=40%
GOBP_EXCRETION	GOBP_EXCRETION		30	-0.57472	-1.73188	0.00720721	0.00872324	0.999	2274	tags=37%, list=17%, signal=44%
GOBP_CEREBELLAR_PURKINJE_CELL_LAYER_MORPHOGENESIS	GOBP_CEREBELLAR_PURKINJE_CELL_LAYER_MORPHOGENESIS		21	-0.631237	-1.73162	0.00194553	0.00873932	0.999	2803	tags=62%, list=21%, signal=78%
GOBP_PATTERN_SPECIFICATION_PROCESS	GOBP_PATTERN_SPECIFICATION_PROCESS		316	-0.406398	-1.7307	0	0.00882659	0.999	3693	tags=40%, list=27%, signal=53%
GOBP_ODONTOGENESIS	GOBP_ODONTOGENESIS		85	-0.480746	-1.72982	0	0.00890973	0.999	3825	tags=46%, list=28%, signal=63%
GOMF_HEPARAN_SULFATE_PROTEOGLYCAN_BINDING	GOMF_HEPARAN_SULFATE_PROTEOGLYCAN_BINDING		16	-0.673127	-1.72893	0.0114068	0.00899807	0.999	2848	tags=50%, list=21%, signal=63%
GOBP_AORTA_MORPHOGENESIS	GOBP_AORTA_MORPHOGENESIS		30	-0.574205	-1.72873	0.00572519	0.0090085	0.999	3309	tags=47%, list=24%, signal=62%
GOBP_REGULATION_OF_ENDOTHELIAL_CELL_MIGRATION	GOBP_REGULATION_OF_ENDOTHELIAL_CELL_MIGRATION		153	-0.440212	-1.72857	0.00181488	0.00901215	0.999	3129	tags=33%, list=23%, signal=43%
GOBP_CELLULAR_METAL_ION_HOMEOSTASIS	GOBP_CELLULAR_METAL_ION_HOMEOSTASIS		305	-0.405441	-1.72824	0	0.00902486	0.999	2234	tags=24%, list=16%, signal=28%
GOBP_SENSORY_PERCEPTION_OF_LIGHT_STIMULUS	GOBP_SENSORY_PERCEPTION_OF_LIGHT_STIMULUS		64	-0.499016	-1.72827	0	0.00903192	0.999	1815	tags=28%, list=13%, signal=32%
GOBP_CELLULAR_ION_HOMEOSTASIS	GOBP_CELLULAR_ION_HOMEOSTASIS		370	-0.399101	-1.72801	0	0.00904049	0.999	3079	tags=30%, list=23%, signal=37%
GOBP_PEPTIDYL_TYROSINE_AUTOPHOSPHORYLATION	GOBP_PEPTIDYL_TYROSINE_AUTOPHOSPHORYLATION		20	-0.632176	-1.72761	0.00583658	0.00906936	0.999	2604	tags=35%, list=19%, signal=43%
GOBP_REGULATION_OF_HORMONE_LEVELS	GOBP_REGULATION_OF_HORMONE_LEVELS		404	-0.397137	-1.72638	0	0.0091658	0.999	3017	tags=30%, list=22%, signal=38%
GOBP_MYELIN_ASSEMBLY	GOBP_MYELIN_ASSEMBLY		22	-0.63071	-1.7265	0.0018797	0.00916637	0.999	3857	tags=55%, list=28%, signal=76%
GOBP_FIBROBLAST_GROWTH_FACTOR_RECEPTOR_SIGNALING_PATHWAY	GOBP_FIBROBLAST_GROWTH_FACTOR_RECEPTOR_SIGNALING_PATHWAY		62	-0.505043	-1.72654	0.00385356	0.00917086	0.999	2711	tags=35%, list=20%, signal=44%
GOBP_REGULATION_OF_INSULIN_SECRETION	GOBP_REGULATION_OF_INSULIN_SECRETION		142	-0.442214	-1.72657	0	0.00917673	0.999	1758	tags=25%, list=13%, signal=28%
GOMF_PHOSPHOLIPID_BINDING	GOMF_PHOSPHOLIPID_BINDING		362	-0.400629	-1.72593	0	0.00921678	0.999	2381	tags=24%, list=18%, signal=28%
GOBP_MICROTUBULE_POLYMERIZATION	GOBP_MICROTUBULE_POLYMERIZATION		74	-0.486415	-1.72515	0.00373832	0.009262	0.999	955	tags=26%, list=7%, signal=27%
GOBP_RHYTHMIC_PROCESS	GOBP_RHYTHMIC_PROCESS		231	-0.419607	-1.72523	0	0.00926792	0.999	3871	tags=45%, list=29%, signal=62%
GOBP_POSITIVE_CHEMOTAXIS	GOBP_POSITIVE_CHEMOTAXIS		36	-0.559993	-1.7246	0.00194932	0.00931286	0.999	2420	tags=33%, list=18%, signal=40%
GOBP_REGULATION_OF_TRANSMEMBRANE_RECEPTOR_PROTEIN_SERINE_THREONINE_KINASE_SIGNALING_PATHWAY	GOBP_REGULATION_OF_TRANSMEMBRANE_RECEPTOR_PROTEIN_SERINE_THREONINE_KINASE_SIGNALING_PATHWAY		214	-0.422736	-1.72405	0	0.00937412	0.999	4350	tags=49%, list=32%, signal=71%
GOBP_REGULATION_OF_COAGULATION	GOBP_REGULATION_OF_COAGULATION		53	-0.51474	-1.72383	0	0.00939182	0.999	4037	tags=45%, list=30%, signal=64%
GOBP_CELLULAR_GLUCOSE_HOMEOSTASIS	GOBP_CELLULAR_GLUCOSE_HOMEOSTASIS		135	-0.448782	-1.72322	0	0.00944638	0.999	1992	tags=28%, list=15%, signal=33%
GOBP_AORTIC_VALVE_MORPHOGENESIS	GOBP_AORTIC_VALVE_MORPHOGENESIS		19	-0.634191	-1.72258	0.00808081	0.00952738	0.999	2970	tags=53%, list=22%, signal=67%
GOBP_PROTEIN_LOCALIZATION_TO_PLASMA_MEMBRANE	GOBP_PROTEIN_LOCALIZATION_TO_PLASMA_MEMBRANE		273	-0.410744	-1.72248	0	0.00953038	0.999	3388	tags=36%, list=25%, signal=47%
GOBP_POSITIVE_REGULATION_OF_MUSCLE_CONTRACTION	GOBP_POSITIVE_REGULATION_OF_MUSCLE_CONTRACTION		36	-0.564146	-1.7214	0.00191205	0.00964999	0.999	3183	tags=47%, list=23%, signal=62%
GOBP_NEGATIVE_REGULATION_OF_EPITHELIAL_CELL_MIGRATION	GOBP_NEGATIVE_REGULATION_OF_EPITHELIAL_CELL_MIGRATION		61	-0.501554	-1.72093	0	0.00968824	0.999	3382	tags=44%, list=25%, signal=59%
GOBP_LYMPH_VESSEL_DEVELOPMENT	GOBP_LYMPH_VESSEL_DEVELOPMENT		29	-0.584342	-1.7203	0.00364299	0.00973947	0.999	3176	tags=48%, list=23%, signal=63%
GOBP_GLIOGENESIS	GOBP_GLIOGENESIS		291	-0.411279	-1.71984	0	0.00979867	0.999	3017	tags=35%, list=22%, signal=45%
GOBP_REGULATION_OF_MICROTUBULE_CYTOSKELETON_ORGANIZATION	GOBP_REGULATION_OF_MICROTUBULE_CYTOSKELETON_ORGANIZATION		143	-0.44504	-1.71902	0	0.00987323	0.999	2633	tags=38%, list=19%, signal=47%
GOBP_SMOOTH_MUSCLE_CELL_MIGRATION	GOBP_SMOOTH_MUSCLE_CELL_MIGRATION		100	-0.458314	-1.71876	0	0.00987852	0.999	2988	tags=35%, list=22%, signal=45%
GOBP_CORPUS_CALLOSUM_DEVELOPMENT	GOBP_CORPUS_CALLOSUM_DEVELOPMENT		24	-0.596734	-1.71881	0.00775194	0.00988369	0.999	2575	tags=38%, list=19%, signal=46%
GOBP_EMBRYONIC_DIGIT_MORPHOGENESIS	GOBP_EMBRYONIC_DIGIT_MORPHOGENESIS		57	-0.503318	-1.71855	0	0.00989031	0.999	3201	tags=40%, list=24%, signal=53%
GOBP_POSITIVE_REGULATION_OF_PEPTIDYL_TYROSINE_PHOSPHORYLATION	GOBP_POSITIVE_REGULATION_OF_PEPTIDYL_TYROSINE_PHOSPHORYLATION		147	-0.436086	-1.71815	0	0.00990719	0.999	4025	tags=41%, list=30%, signal=57%
GOBP_MICROTUBULE_BASED_MOVEMENT	GOBP_MICROTUBULE_BASED_MOVEMENT		243	-0.414841	-1.71821	0	0.00991244	0.999	3163	tags=37%, list=23%, signal=47%
GOBP_SPECIFICATION_OF_ANIMAL_ORGAN_IDENTITY	GOBP_SPECIFICATION_OF_ANIMAL_ORGAN_IDENTITY		27	-0.60534	-1.71707	0.00189753	0.0100032	0.999	3010	tags=48%, list=22%, signal=62%
GOBP_NEGATIVE_REGULATION_OF_CHEMOTAXIS	GOBP_NEGATIVE_REGULATION_OF_CHEMOTAXIS		50	-0.522926	-1.71673	0.00182149	0.0100369	0.999	2719	tags=38%, list=20%, signal=47%
GOBP_RELEASE_OF_SEQUESTERED_CALCIUM_ION_INTO_CYTOSOL_BY_ENDOPLASMIC_RETICULUM	GOBP_RELEASE_OF_SEQUESTERED_CALCIUM_ION_INTO_CYTOSOL_BY_ENDOPLASMIC_RETICULUM		21	-0.63102	-1.71554	0.00568182	0.0101416	1	2741	tags=52%, list=20%, signal=66%
GOBP_SYNAPSE_MATURATION	GOBP_SYNAPSE_MATURATION		28	-0.5767	-1.7156	0.00909091	0.010147	1	2710	tags=61%, list=20%, signal=76%
GOBP_POSTSYNAPTIC_NEUROTRANSMITTER_RECEPTOR_INTERNALIZATION	GOBP_POSTSYNAPTIC_NEUROTRANSMITTER_RECEPTOR_INTERNALIZATION		29	-0.580305	-1.71531	0.00384615	0.0101595	1	1368	tags=34%, list=10%, signal=38%
GOBP_POSITIVE_REGULATION_OF_CELLULAR_COMPONENT_BIOGENESIS	GOBP_POSITIVE_REGULATION_OF_CELLULAR_COMPONENT_BIOGENESIS		436	-0.392154	-1.71508	0	0.0101787	1	3415	tags=37%, list=25%, signal=48%
GOBP_MESENCHYMAL_CELL_PROLIFERATION	GOBP_MESENCHYMAL_CELL_PROLIFERATION		48	-0.524185	-1.71427	0.00191205	0.0102597	1	3201	tags=48%, list=24%, signal=62%
GOBP_REGULATION_OF_RUFFLE_ASSEMBLY	GOBP_REGULATION_OF_RUFFLE_ASSEMBLY		24	-0.603	-1.71383	0.00373134	0.010273	1	3185	tags=42%, list=23%, signal=54%
GOBP_PROTEIN_KINASE_A_SIGNALING	GOBP_PROTEIN_KINASE_A_SIGNALING		24	-0.616669	-1.71384	0.00392157	0.0102824	1	2565	tags=42%, list=19%, signal=51%
GOBP_REGULATION_OF_PROTEIN_POLYMERIZATION	GOBP_REGULATION_OF_PROTEIN_POLYMERIZATION		171	-0.426319	-1.71141	0	0.0105352	1	2713	tags=35%, list=20%, signal=43%
GOBP_REGULATION_OF_BROWN_FAT_CELL_DIFFERENTIATION	GOBP_REGULATION_OF_BROWN_FAT_CELL_DIFFERENTIATION		23	-0.614449	-1.70976	0.00592885	0.0107152	1	3908	tags=57%, list=29%, signal=79%
GOBP_POSITIVE_REGULATION_OF_CHOLESTEROL_EFFLUX	GOBP_POSITIVE_REGULATION_OF_CHOLESTEROL_EFFLUX		26	-0.597749	-1.70993	0	0.0107195	1	3000	tags=35%, list=22%, signal=44%
GOBP_REGULATION_OF_MYELINATION	GOBP_REGULATION_OF_MYELINATION		45	-0.529199	-1.70986	0.00189394	0.0107225	1	2265	tags=38%, list=17%, signal=45%
GOBP_PEPTIDYL_THREONINE_MODIFICATION	GOBP_PEPTIDYL_THREONINE_MODIFICATION		110	-0.451263	-1.70955	0	0.0107233	1	3765	tags=48%, list=28%, signal=66%
GOBP_NEGATIVE_REGULATION_OF_ENDOTHELIAL_CELL_MIGRATION	GOBP_NEGATIVE_REGULATION_OF_ENDOTHELIAL_CELL_MIGRATION		48	-0.528632	-1.70901	0	0.0107647	1	3382	tags=46%, list=25%, signal=61%
GOBP_CGMP_MEDIATED_SIGNALING	GOBP_CGMP_MEDIATED_SIGNALING		23	-0.613909	-1.70853	0.00584795	0.0108072	1	2711	tags=43%, list=20%, signal=54%
GOBP_NEGATIVE_REGULATION_OF_TRANSMEMBRANE_RECEPTOR_PROTEIN_SERINE_THREONINE_KINASE_SIGNALING_PATHWAY	GOBP_NEGATIVE_REGULATION_OF_TRANSMEMBRANE_RECEPTOR_PROTEIN_SERINE_THREONINE_KINASE_SIGNALING_PATHWAY		115	-0.447811	-1.70783	0.00348432	0.0108395	1	4350	tags=52%, list=32%, signal=76%
GOCC_GLIAL_CELL_PROJECTION	GOCC_GLIAL_CELL_PROJECTION		33	-0.55591	-1.70789	0.00381679	0.0108443	1	2848	tags=55%, list=21%, signal=69%
GOBP_T_HELPER_17_CELL_DIFFERENTIATION	GOBP_T_HELPER_17_CELL_DIFFERENTIATION		21	-0.615336	-1.70794	0.00594059	0.0108491	1	4325	tags=67%, list=32%, signal=98%
GOMF_ATPASE_COUPLED_CATION_TRANSMEMBRANE_TRANSPORTER_ACTIVITY	GOMF_ATPASE_COUPLED_CATION_TRANSMEMBRANE_TRANSPORTER_ACTIVITY		38	-0.548085	-1.70798	0.00607287	0.0108539	1	1502	tags=32%, list=11%, signal=35%
GOMF_P_TYPE_TRANSMEMBRANE_TRANSPORTER_ACTIVITY	GOMF_P_TYPE_TRANSMEMBRANE_TRANSPORTER_ACTIVITY		21	-0.621666	-1.70799	0.00735294	0.0108651	1	1181	tags=33%, list=9%, signal=36%
GOBP_REGULATION_OF_TRANSMISSION_OF_NERVE_IMPULSE	GOBP_REGULATION_OF_TRANSMISSION_OF_NERVE_IMPULSE		16	-0.673705	-1.70734	0.00747664	0.0108842	1	2396	tags=44%, list=18%, signal=53%
GOMF_METAL_CATION_MONOATOMIC_CATION_ANTIPORTER_ACTIVITY	GOMF_METAL_CATION_MONOATOMIC_CATION_ANTIPORTER_ACTIVITY		16	-0.658024	-1.70717	0.00531915	0.010891	1	2205	tags=44%, list=16%, signal=52%
GOBP_RESPONSE_TO_DIETARY_EXCESS	GOBP_RESPONSE_TO_DIETARY_EXCESS		30	-0.575705	-1.70708	0.00182815	0.0108912	1	1432	tags=30%, list=11%, signal=33%
GOBP_CELLULAR_RESPONSE_TO_ORGANIC_CYCLIC_COMPOUND	GOBP_CELLULAR_RESPONSE_TO_ORGANIC_CYCLIC_COMPOUND		376	-0.392005	-1.70651	0	0.0109447	1	3434	tags=35%, list=25%, signal=46%
GOMF_CLATHRIN_BINDING	GOMF_CLATHRIN_BINDING		58	-0.50084	-1.70519	0	0.011097	1	1834	tags=31%, list=14%, signal=36%
GOBP_AUTONOMIC_NERVOUS_SYSTEM_DEVELOPMENT	GOBP_AUTONOMIC_NERVOUS_SYSTEM_DEVELOPMENT		37	-0.548998	-1.70466	0.00364299	0.0111311	1	2447	tags=38%, list=18%, signal=46%
GOMF_PHOSPHATASE_BINDING	GOMF_PHOSPHATASE_BINDING		199	-0.419435	-1.70441	0	0.0111475	1	3967	tags=47%, list=29%, signal=65%
GOCC_DENDRITE_CYTOPLASM	GOCC_DENDRITE_CYTOPLASM		27	-0.578906	-1.7034	0.005386	0.0112495	1	1675	tags=33%, list=12%, signal=38%
GOBP_FAT_CELL_DIFFERENTIATION	GOBP_FAT_CELL_DIFFERENTIATION		218	-0.411511	-1.70241	0	0.0113768	1	3544	tags=39%, list=26%, signal=52%
GOBP_DENDRITIC_SPINE_MAINTENANCE	GOBP_DENDRITIC_SPINE_MAINTENANCE		22	-0.629171	-1.70225	0.00583658	0.0113892	1	1405	tags=32%, list=10%, signal=35%
GOBP_CILIUM_ORGANIZATION	GOBP_CILIUM_ORGANIZATION		225	-0.415684	-1.70209	0	0.0113952	1	3149	tags=32%, list=23%, signal=41%
GOBP_CELL_ADHESION_MEDIATED_BY_INTEGRIN	GOBP_CELL_ADHESION_MEDIATED_BY_INTEGRIN		70	-0.485077	-1.70199	0.00189036	0.0113987	1	3224	tags=36%, list=24%, signal=47%
GOMF_PROTEIN_PHOSPHATASE_BINDING	GOMF_PROTEIN_PHOSPHATASE_BINDING		156	-0.427535	-1.70189	0	0.0114109	1	2689	tags=31%, list=20%, signal=39%
GOBP_RESPONSE_TO_CAMP	GOBP_RESPONSE_TO_CAMP		45	-0.521471	-1.70162	0	0.0114395	1	2308	tags=33%, list=17%, signal=40%
GOBP_NEUROTRANSMITTER_RECEPTOR_TRANSPORT_TO_PLASMA_MEMBRANE	GOBP_NEUROTRANSMITTER_RECEPTOR_TRANSPORT_TO_PLASMA_MEMBRANE		20	-0.625544	-1.70133	0.00803213	0.0114492	1	2415	tags=45%, list=18%, signal=55%
GOBP_PROTEIN_O_LINKED_GLYCOSYLATION	GOBP_PROTEIN_O_LINKED_GLYCOSYLATION		51	-0.504634	-1.70124	0.00396825	0.0114526	1	1730	tags=20%, list=13%, signal=22%
GOBP_FOREBRAIN_NEURON_DEVELOPMENT	GOBP_FOREBRAIN_NEURON_DEVELOPMENT		19	-0.626238	-1.70076	0.00371058	0.0115048	1	789	tags=37%, list=6%, signal=39%
GOBP_REGULATION_OF_CIRCADIAN_RHYTHM	GOBP_REGULATION_OF_CIRCADIAN_RHYTHM		100	-0.457148	-1.70016	0.00186567	0.0115644	1	2321	tags=34%, list=17%, signal=41%
GOBP_ACTIN_FILAMENT_BUNDLE_ORGANIZATION	GOBP_ACTIN_FILAMENT_BUNDLE_ORGANIZATION		156	-0.430461	-1.69951	0	0.011649	1	3393	tags=39%, list=25%, signal=52%
GOBP_RESPONSE_TO_DECREASED_OXYGEN_LEVELS	GOBP_RESPONSE_TO_DECREASED_OXYGEN_LEVELS		188	-0.420383	-1.69853	0	0.0117567	1	2979	tags=30%, list=22%, signal=38%
GOBP_REGULATION_OF_AMYLOID_PRECURSOR_PROTEIN_CATABOLIC_PROCESS	GOBP_REGULATION_OF_AMYLOID_PRECURSOR_PROTEIN_CATABOLIC_PROCESS		38	-0.539106	-1.69784	0.003861	0.0118151	1	3665	tags=53%, list=27%, signal=72%
GOBP_MODIFICATION_OF_SYNAPTIC_STRUCTURE	GOBP_MODIFICATION_OF_SYNAPTIC_STRUCTURE		31	-0.562969	-1.69791	0.00559702	0.0118221	1	2686	tags=42%, list=20%, signal=52%
GOBP_SUBSTRATE_DEPENDENT_CELL_MIGRATION	GOBP_SUBSTRATE_DEPENDENT_CELL_MIGRATION		25	-0.590399	-1.69748	0.0139165	0.0118568	1	2995	tags=48%, list=22%, signal=61%
GOBP_FORELIMB_MORPHOGENESIS	GOBP_FORELIMB_MORPHOGENESIS		30	-0.560795	-1.69727	0.00559702	0.0118616	1	3913	tags=53%, list=29%, signal=75%
GOMF_MICROTUBULE_BINDING	GOMF_MICROTUBULE_BINDING		217	-0.411667	-1.69733	0	0.011871	1	1331	tags=24%, list=10%, signal=26%
GOCC_EXTRINSIC_COMPONENT_OF_POSTSYNAPTIC_MEMBRANE	GOCC_EXTRINSIC_COMPONENT_OF_POSTSYNAPTIC_MEMBRANE		15	-0.666439	-1.69704	0.00961539	0.0118857	1	2713	tags=60%, list=20%, signal=75%
GOMF_PROTEIN_KINASE_A_CATALYTIC_SUBUNIT_BINDING	GOMF_PROTEIN_KINASE_A_CATALYTIC_SUBUNIT_BINDING		15	-0.66764	-1.69616	0.0116279	0.0119677	1	2520	tags=47%, list=19%, signal=57%
GOCC_CILIARY_PLASM	GOCC_CILIARY_PLASM		58	-0.494256	-1.6962	0.00377358	0.0119734	1	2575	tags=34%, list=19%, signal=42%
GOMF_PHOSPHATIDYLINOSITOL_4_5_BISPHOSPHATE_BINDING	GOMF_PHOSPHATIDYLINOSITOL_4_5_BISPHOSPHATE_BINDING		64	-0.485736	-1.69624	0	0.0119804	1	2960	tags=33%, list=22%, signal=42%
GOBP_REGULATION_OF_SMOOTHENED_SIGNALING_PATHWAY	GOBP_REGULATION_OF_SMOOTHENED_SIGNALING_PATHWAY		78	-0.479746	-1.69583	0.00189753	0.011982	1	3024	tags=41%, list=22%, signal=52%
GOBP_GLIAL_CELL_DIFFERENTIATION	GOBP_GLIAL_CELL_DIFFERENTIATION		200	-0.416873	-1.69566	0	0.0119828	1	3128	tags=37%, list=23%, signal=47%
GOBP_REGULATION_OF_PEPTIDE_TRANSPORT	GOBP_REGULATION_OF_PEPTIDE_TRANSPORT		175	-0.421975	-1.69574	0	0.0119861	1	3017	tags=35%, list=22%, signal=45%
GOBP_CLATHRIN_DEPENDENT_ENDOCYTOSIS	GOBP_CLATHRIN_DEPENDENT_ENDOCYTOSIS		42	-0.529768	-1.69587	0.0019084	0.0119927	1	2876	tags=48%, list=21%, signal=60%
GOBP_REGULATION_OF_PHOSPHOLIPASE_ACTIVITY	GOBP_REGULATION_OF_PHOSPHOLIPASE_ACTIVITY		44	-0.525718	-1.69464	0.00194932	0.0120927	1	3495	tags=55%, list=26%, signal=73%
GOMF_SMAD_BINDING	GOMF_SMAD_BINDING		77	-0.470462	-1.69442	0	0.0120981	1	4389	tags=55%, list=32%, signal=80%
GOBP_TRANSFORMING_GROWTH_FACTOR_BETA_RECEPTOR_SIGNALING_PATHWAY	GOBP_TRANSFORMING_GROWTH_FACTOR_BETA_RECEPTOR_SIGNALING_PATHWAY		177	-0.423961	-1.69446	0	0.0121064	1	4350	tags=51%, list=32%, signal=75%
GOBP_ANIMAL_ORGAN_FORMATION	GOBP_ANIMAL_ORGAN_FORMATION		53	-0.506849	-1.69387	0	0.0121694	1	2702	tags=40%, list=20%, signal=49%
GOBP_ENDOTHELIAL_CELL_MIGRATION	GOBP_ENDOTHELIAL_CELL_MIGRATION		201	-0.422059	-1.69344	0	0.0122332	1	3846	tags=39%, list=28%, signal=54%
GOBP_HIPPOCAMPUS_DEVELOPMENT	GOBP_HIPPOCAMPUS_DEVELOPMENT		58	-0.501252	-1.69257	0.00192308	0.0123519	1	2540	tags=38%, list=19%, signal=46%
GOBP_REGULATION_OF_ACTIN_FILAMENT_ORGANIZATION	GOBP_REGULATION_OF_ACTIN_FILAMENT_ORGANIZATION		230	-0.407322	-1.6923	0	0.0123763	1	2275	tags=28%, list=17%, signal=33%
GOBP_POSITIVE_REGULATION_OF_EXTRACELLULAR_MATRIX_ORGANIZATION	GOBP_POSITIVE_REGULATION_OF_EXTRACELLULAR_MATRIX_ORGANIZATION		25	-0.59549	-1.69208	0.00988142	0.0123886	1	1329	tags=36%, list=10%, signal=40%
GOBP_FORMATION_OF_PRIMARY_GERM_LAYER	GOBP_FORMATION_OF_PRIMARY_GERM_LAYER		79	-0.473063	-1.69173	0.00193424	0.0124189	1	3743	tags=46%, list=28%, signal=63%
GOBP_BEHAVIORAL_RESPONSE_TO_PAIN	GOBP_BEHAVIORAL_RESPONSE_TO_PAIN		21	-0.634522	-1.69101	0.00371058	0.0125185	1	828	tags=29%, list=6%, signal=30%
GOBP_REGULATION_OF_CAMP_MEDIATED_SIGNALING	GOBP_REGULATION_OF_CAMP_MEDIATED_SIGNALING		31	-0.565351	-1.69044	0.0018622	0.0125853	1	2620	tags=55%, list=19%, signal=68%
GOCC_STEREOCILIUM	GOCC_STEREOCILIUM		36	-0.551427	-1.69006	0	0.0126288	1	3134	tags=44%, list=23%, signal=58%
GOBP_POSITIVE_REGULATION_OF_DENDRITIC_SPINE_DEVELOPMENT	GOBP_POSITIVE_REGULATION_OF_DENDRITIC_SPINE_DEVELOPMENT		59	-0.492885	-1.68951	0.00180505	0.0126795	1	2977	tags=37%, list=22%, signal=48%
GOBP_CELLULAR_RESPONSE_TO_HORMONE_STIMULUS	GOBP_CELLULAR_RESPONSE_TO_HORMONE_STIMULUS		401	-0.386174	-1.6888	0	0.0127691	1	3480	tags=36%, list=26%, signal=47%
GOCC_COSTAMERE	GOCC_COSTAMERE		17	-0.650054	-1.68826	0.0117188	0.012812	1	2971	tags=71%, list=22%, signal=90%
GOMF_MICROFILAMENT_MOTOR_ACTIVITY	GOMF_MICROFILAMENT_MOTOR_ACTIVITY		24	-0.59045	-1.68834	0.00583658	0.0128149	1	2040	tags=25%, list=15%, signal=29%
GOBP_DETECTION_OF_STIMULUS_INVOLVED_IN_SENSORY_PERCEPTION_OF_PAIN	GOBP_DETECTION_OF_STIMULUS_INVOLVED_IN_SENSORY_PERCEPTION_OF_PAIN		22	-0.609171	-1.6881	0.0087108	0.0128212	1	2052	tags=36%, list=15%, signal=43%
GOBP_SMOOTHENED_SIGNALING_PATHWAY	GOBP_SMOOTHENED_SIGNALING_PATHWAY		131	-0.436131	-1.68748	0	0.0128681	1	2916	tags=35%, list=21%, signal=44%
GOBP_POSITIVE_REGULATION_OF_BIOMINERALIZATION	GOBP_POSITIVE_REGULATION_OF_BIOMINERALIZATION		42	-0.523588	-1.6875	0.00386847	0.0128795	1	3481	tags=45%, list=26%, signal=61%
GOBP_RESPIRATORY_SYSTEM_PROCESS	GOBP_RESPIRATORY_SYSTEM_PROCESS		30	-0.564073	-1.68727	0.0111317	0.0128856	1	2128	tags=47%, list=16%, signal=55%
GOBP_CIRCADIAN_SLEEP_WAKE_CYCLE_SLEEP	GOBP_CIRCADIAN_SLEEP_WAKE_CYCLE_SLEEP		15	-0.662819	-1.68751	0.00747664	0.0128909	1	2225	tags=53%, list=16%, signal=64%
GOBP_SMOOTH_MUSCLE_CELL_PROLIFERATION	GOBP_SMOOTH_MUSCLE_CELL_PROLIFERATION		165	-0.415597	-1.68594	0	0.013067	1	3390	tags=38%, list=25%, signal=50%
GOBP_KIDNEY_MORPHOGENESIS	GOBP_KIDNEY_MORPHOGENESIS		82	-0.472426	-1.68577	0	0.0130867	1	3201	tags=35%, list=24%, signal=46%
GOBP_CELLULAR_RESPONSE_TO_PEPTIDE	GOBP_CELLULAR_RESPONSE_TO_PEPTIDE		262	-0.400997	-1.68488	0	0.0132025	1	3788	tags=40%, list=28%, signal=55%
GOBP_MUSCLE_ORGAN_MORPHOGENESIS	GOBP_MUSCLE_ORGAN_MORPHOGENESIS		61	-0.498692	-1.68438	0	0.013281	1	2838	tags=39%, list=21%, signal=50%
GOBP_EAR_DEVELOPMENT	GOBP_EAR_DEVELOPMENT		182	-0.419898	-1.68353	0	0.0133879	1	3315	tags=36%, list=24%, signal=47%
GOBP_NEGATIVE_REGULATION_OF_CELL_GROWTH	GOBP_NEGATIVE_REGULATION_OF_CELL_GROWTH		168	-0.423089	-1.68336	0	0.0133917	1	3590	tags=37%, list=26%, signal=50%
GOBP_POSITIVE_REGULATION_OF_VASCULAR_ASSOCIATED_SMOOTH_MUSCLE_CELL_PROLIFERATION	GOBP_POSITIVE_REGULATION_OF_VASCULAR_ASSOCIATED_SMOOTH_MUSCLE_CELL_PROLIFERATION		38	-0.533701	-1.68297	0.00558659	0.0134315	1	3003	tags=39%, list=22%, signal=51%
GOBP_CARDIAC_MUSCLE_CELL_PROLIFERATION	GOBP_CARDIAC_MUSCLE_CELL_PROLIFERATION		50	-0.501474	-1.68175	0.00725953	0.0135846	1	2765	tags=44%, list=20%, signal=55%
GOBP_REGULATION_OF_GLUCOSE_TRANSMEMBRANE_TRANSPORT	GOBP_REGULATION_OF_GLUCOSE_TRANSMEMBRANE_TRANSPORT		68	-0.483292	-1.68184	0.00175747	0.013587	1	3650	tags=41%, list=27%, signal=56%
GOBP_SECONDARY_PALATE_DEVELOPMENT	GOBP_SECONDARY_PALATE_DEVELOPMENT		21	-0.600263	-1.68097	0.00578035	0.0136909	1	1851	tags=29%, list=14%, signal=33%
GOMF_SYMPORTER_ACTIVITY	GOMF_SYMPORTER_ACTIVITY		87	-0.453427	-1.68022	0	0.0137921	1	2560	tags=26%, list=19%, signal=32%
GOBP_REGULATION_OF_BIOMINERALIZATION	GOBP_REGULATION_OF_BIOMINERALIZATION		76	-0.475246	-1.67984	0.00194175	0.0138311	1	3331	tags=39%, list=25%, signal=52%
GOBP_JNK_CASCADE	GOBP_JNK_CASCADE		149	-0.424534	-1.67958	0	0.0138354	1	2848	tags=34%, list=21%, signal=42%
GOMF_EXTRACELLULAR_MATRIX_BINDING	GOMF_EXTRACELLULAR_MATRIX_BINDING		50	-0.512147	-1.67958	0.00187266	0.0138487	1	2897	tags=38%, list=21%, signal=48%
GOBP_BIOMINERALIZATION	GOBP_BIOMINERALIZATION		135	-0.435091	-1.67901	0	0.0139006	1	3739	tags=40%, list=28%, signal=55%
GOBP_POSITIVE_REGULATION_OF_DENDRITE_MORPHOGENESIS	GOBP_POSITIVE_REGULATION_OF_DENDRITE_MORPHOGENESIS		52	-0.502436	-1.67887	0.00189394	0.0139098	1	2977	tags=33%, list=22%, signal=42%
GOBP_REGULATION_OF_FAT_CELL_DIFFERENTIATION	GOBP_REGULATION_OF_FAT_CELL_DIFFERENTIATION		125	-0.438922	-1.67834	0	0.0139748	1	4655	tags=54%, list=34%, signal=81%
GOMF_PROTEIN_TYROSINE_KINASE_BINDING	GOMF_PROTEIN_TYROSINE_KINASE_BINDING		101	-0.448273	-1.67816	0	0.0140051	1	2587	tags=33%, list=19%, signal=40%
GOMF_SEMAPHORIN_RECEPTOR_BINDING	GOMF_SEMAPHORIN_RECEPTOR_BINDING		22	-0.607602	-1.67765	0.00367647	0.0140369	1	3534	tags=50%, list=26%, signal=67%
GOBP_EYE_PHOTORECEPTOR_CELL_DEVELOPMENT	GOBP_EYE_PHOTORECEPTOR_CELL_DEVELOPMENT		22	-0.59882	-1.67767	0.0122699	0.0140503	1	3516	tags=59%, list=26%, signal=80%
GOMF_INTRAMEMBRANE_LIPID_TRANSPORTER_ACTIVITY	GOMF_INTRAMEMBRANE_LIPID_TRANSPORTER_ACTIVITY		39	-0.5297	-1.6777	0.00763359	0.0140555	1	3337	tags=44%, list=25%, signal=58%
GOBP_ENDOTHELIUM_DEVELOPMENT	GOBP_ENDOTHELIUM_DEVELOPMENT		125	-0.431229	-1.67676	0	0.0141529	1	4045	tags=41%, list=30%, signal=58%
GOBP_SMOOTH_MUSCLE_CELL_DIFFERENTIATION	GOBP_SMOOTH_MUSCLE_CELL_DIFFERENTIATION		68	-0.480002	-1.67681	0.00371747	0.0141581	1	3331	tags=46%, list=25%, signal=60%
GOBP_INSULIN_SECRETION_INVOLVED_IN_CELLULAR_RESPONSE_TO_GLUCOSE_STIMULUS	GOBP_INSULIN_SECRETION_INVOLVED_IN_CELLULAR_RESPONSE_TO_GLUCOSE_STIMULUS		78	-0.468706	-1.67641	0.00181488	0.0142019	1	2923	tags=40%, list=22%, signal=50%
GOBP_POSITIVE_REGULATION_OF_BLOOD_CIRCULATION	GOBP_POSITIVE_REGULATION_OF_BLOOD_CIRCULATION		34	-0.539178	-1.67564	0.00574713	0.0142759	1	3060	tags=41%, list=23%, signal=53%
GOBP_PHOSPHATIDIC_ACID_METABOLIC_PROCESS	GOBP_PHOSPHATIDIC_ACID_METABOLIC_PROCESS		23	-0.61606	-1.67549	0.00731261	0.01428	1	1903	tags=35%, list=14%, signal=40%
GOBP_EPITHELIAL_TO_MESENCHYMAL_TRANSITION	GOBP_EPITHELIAL_TO_MESENCHYMAL_TRANSITION		137	-0.43779	-1.67568	0	0.0142848	1	4026	tags=50%, list=30%, signal=70%
GOCC_APICAL_PLASMA_MEMBRANE	GOCC_APICAL_PLASMA_MEMBRANE		268	-0.398767	-1.67573	0	0.0142924	1	2877	tags=25%, list=21%, signal=31%
GOBP_REGULATION_OF_NMDA_RECEPTOR_ACTIVITY	GOBP_REGULATION_OF_NMDA_RECEPTOR_ACTIVITY		22	-0.610451	-1.67576	0.00591716	0.0143001	1	2977	tags=55%, list=22%, signal=70%
GOBP_NEUROTROPHIN_TRK_RECEPTOR_SIGNALING_PATHWAY	GOBP_NEUROTROPHIN_TRK_RECEPTOR_SIGNALING_PATHWAY		31	-0.555533	-1.6747	0.00555556	0.0143745	1	3293	tags=45%, list=24%, signal=59%
GOBP_CALCINEURIN_MEDIATED_SIGNALING	GOBP_CALCINEURIN_MEDIATED_SIGNALING		40	-0.525764	-1.67479	0.00775194	0.0143752	1	2606	tags=40%, list=19%, signal=49%
GOBP_NEGATIVE_REGULATION_OF_SMALL_GTPASE_MEDIATED_SIGNAL_TRANSDUCTION	GOBP_NEGATIVE_REGULATION_OF_SMALL_GTPASE_MEDIATED_SIGNAL_TRANSDUCTION		54	-0.501799	-1.67458	0.00362976	0.0143807	1	1539	tags=26%, list=11%, signal=29%
GOBP_VASCULAR_ASSOCIATED_SMOOTH_MUSCLE_CELL_PROLIFERATION	GOBP_VASCULAR_ASSOCIATED_SMOOTH_MUSCLE_CELL_PROLIFERATION		68	-0.480166	-1.67441	0.00178571	0.0143963	1	3003	tags=37%, list=22%, signal=47%
GOBP_SUBSTRATE_ADHESION_DEPENDENT_CELL_SPREADING	GOBP_SUBSTRATE_ADHESION_DEPENDENT_CELL_SPREADING		99	-0.451834	-1.67424	0	0.0144037	1	3251	tags=38%, list=24%, signal=50%
GOBP_POSITIVE_REGULATION_OF_BEHAVIOR	GOBP_POSITIVE_REGULATION_OF_BEHAVIOR		22	-0.596089	-1.67288	0.00362319	0.0146173	1	2959	tags=55%, list=22%, signal=70%
GOBP_NEGATIVE_REGULATION_OF_NEURAL_PRECURSOR_CELL_PROLIFERATION	GOBP_NEGATIVE_REGULATION_OF_NEURAL_PRECURSOR_CELL_PROLIFERATION		27	-0.570251	-1.67253	0.00367647	0.0146466	1	3596	tags=44%, list=27%, signal=60%
GOBP_INTEGRIN_MEDIATED_SIGNALING_PATHWAY	GOBP_INTEGRIN_MEDIATED_SIGNALING_PATHWAY		86	-0.461029	-1.67173	0.00191939	0.014789	1	2971	tags=34%, list=22%, signal=43%
GOBP_LENS_FIBER_CELL_DIFFERENTIATION	GOBP_LENS_FIBER_CELL_DIFFERENTIATION		29	-0.569037	-1.6715	0.0094518	0.0148308	1	4019	tags=52%, list=30%, signal=73%
GOBP_MANGANESE_ION_TRANSPORT	GOBP_MANGANESE_ION_TRANSPORT		16	-0.646589	-1.67114	0.00965251	0.0148643	1	2043	tags=38%, list=15%, signal=44%
GOBP_BONE_GROWTH	GOBP_BONE_GROWTH		28	-0.567895	-1.67084	0.0153551	0.0149085	1	2158	tags=46%, list=16%, signal=55%
GOMF_PHOSPHATIDYLINOSITOL_BISPHOSPHATE_BINDING	GOMF_PHOSPHATIDYLINOSITOL_BISPHOSPHATE_BINDING		88	-0.459229	-1.67009	0.00380228	0.0150142	1	2103	tags=25%, list=15%, signal=29%
GOBP_NEGATIVE_REGULATION_OF_CHONDROCYTE_DIFFERENTIATION	GOBP_NEGATIVE_REGULATION_OF_CHONDROCYTE_DIFFERENTIATION		21	-0.603308	-1.66939	0.00782779	0.0151008	1	2681	tags=52%, list=20%, signal=65%
GOBP_REGULATION_OF_ENDOTHELIAL_CELL_DEVELOPMENT	GOBP_REGULATION_OF_ENDOTHELIAL_CELL_DEVELOPMENT		19	-0.634435	-1.66922	0.00592885	0.015118	1	2406	tags=32%, list=18%, signal=38%
GOBP_RESPONSE_TO_INSULIN	GOBP_RESPONSE_TO_INSULIN		201	-0.410021	-1.66894	0	0.0151195	1	3788	tags=42%, list=28%, signal=57%
GOBP_FOREBRAIN_NEURON_DIFFERENTIATION	GOBP_FOREBRAIN_NEURON_DIFFERENTIATION		30	-0.559764	-1.66908	0.00785855	0.0151304	1	2358	tags=47%, list=17%, signal=56%
GOCC_MICROTUBULE_END	GOCC_MICROTUBULE_END		31	-0.549467	-1.66895	0.00556586	0.0151325	1	1706	tags=39%, list=13%, signal=44%
GOMF_PROTEIN_TYROSINE_KINASE_ACTIVITY	GOMF_PROTEIN_TYROSINE_KINASE_ACTIVITY		116	-0.440546	-1.66864	0	0.0151386	1	2681	tags=31%, list=20%, signal=38%
GOBP_ENDOTHELIAL_CELL_DEVELOPMENT	GOBP_ENDOTHELIAL_CELL_DEVELOPMENT		68	-0.475728	-1.66866	0	0.0151527	1	2406	tags=29%, list=18%, signal=36%
GOBP_POSITIVE_REGULATION_OF_AMINE_TRANSPORT	GOBP_POSITIVE_REGULATION_OF_AMINE_TRANSPORT		40	-0.535767	-1.6679	0.00585938	0.0152233	1	2904	tags=45%, list=21%, signal=57%
GOCC_INTEGRIN_COMPLEX	GOCC_INTEGRIN_COMPLEX		28	-0.574204	-1.66762	0.00770713	0.0152445	1	1375	tags=21%, list=10%, signal=24%
GOBP_ENDOCHONDRAL_BONE_GROWTH	GOBP_ENDOCHONDRAL_BONE_GROWTH		24	-0.591951	-1.66768	0.00399202	0.0152494	1	2158	tags=50%, list=16%, signal=59%
GOBP_REGULATION_OF_WNT_SIGNALING_PATHWAY_PLANAR_CELL_POLARITY_PATHWAY	GOBP_REGULATION_OF_WNT_SIGNALING_PATHWAY_PLANAR_CELL_POLARITY_PATHWAY		15	-0.65711	-1.66721	0.0116279	0.0152854	1	2463	tags=40%, list=18%, signal=49%
GOBP_REGULATION_OF_RECEPTOR_RECYCLING	GOBP_REGULATION_OF_RECEPTOR_RECYCLING		26	-0.569821	-1.66659	0.0114723	0.0153337	1	1563	tags=31%, list=12%, signal=35%
GOMF_CHEMOREPELLENT_ACTIVITY	GOMF_CHEMOREPELLENT_ACTIVITY		29	-0.570877	-1.66667	0.00411523	0.015341	1	3534	tags=48%, list=26%, signal=65%
GOBP_INNER_EAR_RECEPTOR_CELL_DEVELOPMENT	GOBP_INNER_EAR_RECEPTOR_CELL_DEVELOPMENT		46	-0.511426	-1.66613	0.00571429	0.0153848	1	3694	tags=46%, list=27%, signal=63%
GOBP_P38MAPK_CASCADE	GOBP_P38MAPK_CASCADE		49	-0.505878	-1.66554	0	0.0154552	1	3139	tags=43%, list=23%, signal=56%
GOBP_MICROTUBULE_BUNDLE_FORMATION	GOBP_MICROTUBULE_BUNDLE_FORMATION		53	-0.495586	-1.66511	0.00368324	0.0155003	1	4081	tags=49%, list=30%, signal=70%
GOMF_INSULIN_RECEPTOR_BINDING	GOMF_INSULIN_RECEPTOR_BINDING		23	-0.588315	-1.66495	0.0152381	0.0155042	1	2848	tags=52%, list=21%, signal=66%
GOBP_REGULATION_OF_NEURAL_PRECURSOR_CELL_PROLIFERATION	GOBP_REGULATION_OF_NEURAL_PRECURSOR_CELL_PROLIFERATION		92	-0.453124	-1.6646	0	0.0155585	1	3941	tags=42%, list=29%, signal=59%
GOBP_VESICLE_LOCALIZATION	GOBP_VESICLE_LOCALIZATION		193	-0.412062	-1.66426	0	0.0155864	1	1642	tags=22%, list=12%, signal=25%
GOBP_REGULATION_OF_MICROTUBULE_BASED_PROCESS	GOBP_REGULATION_OF_MICROTUBULE_BASED_PROCESS		206	-0.403493	-1.66378	0	0.0156243	1	2718	tags=34%, list=20%, signal=42%
GOBP_NEGATIVE_REGULATION_OF_WOUND_HEALING	GOBP_NEGATIVE_REGULATION_OF_WOUND_HEALING		52	-0.504935	-1.66355	0.00382409	0.0156554	1	4373	tags=52%, list=32%, signal=76%
GOBP_MESENCHYME_MORPHOGENESIS	GOBP_MESENCHYME_MORPHOGENESIS		48	-0.503437	-1.66342	0.00182482	0.0156581	1	3955	tags=52%, list=29%, signal=73%
GOBP_REGULATION_OF_CLATHRIN_DEPENDENT_ENDOCYTOSIS	GOBP_REGULATION_OF_CLATHRIN_DEPENDENT_ENDOCYTOSIS		18	-0.644834	-1.66323	0.00767754	0.0156812	1	2729	tags=50%, list=20%, signal=63%
GOBP_POSITIVE_REGULATION_OF_STRESS_ACTIVATED_PROTEIN_KINASE_SIGNALING_CASCADE	GOBP_POSITIVE_REGULATION_OF_STRESS_ACTIVATED_PROTEIN_KINASE_SIGNALING_CASCADE		113	-0.439329	-1.66178	0	0.0159059	1	3398	tags=39%, list=25%, signal=52%
GOBP_BONE_TRABECULA_MORPHOGENESIS	GOBP_BONE_TRABECULA_MORPHOGENESIS		15	-0.665367	-1.66122	0.0114504	0.0159572	1	2776	tags=47%, list=20%, signal=59%
GOBP_GLOMERULAR_EPITHELIUM_DEVELOPMENT	GOBP_GLOMERULAR_EPITHELIUM_DEVELOPMENT		15	-0.663843	-1.66045	0.0133588	0.0160712	1	4469	tags=87%, list=33%, signal=129%
GOCC_APICAL_PART_OF_CELL	GOCC_APICAL_PART_OF_CELL		348	-0.386321	-1.66033	0	0.0160746	1	2877	tags=25%, list=21%, signal=31%
GOBP_POSITIVE_REGULATION_OF_ENDOCYTOSIS	GOBP_POSITIVE_REGULATION_OF_ENDOCYTOSIS		110	-0.445775	-1.65945	0	0.016226	1	2848	tags=31%, list=21%, signal=39%
GOBP_REGULATION_OF_LIPASE_ACTIVITY	GOBP_REGULATION_OF_LIPASE_ACTIVITY		56	-0.491094	-1.65916	0.00378072	0.0162461	1	3495	tags=46%, list=26%, signal=62%
GOBP_BONE_CELL_DEVELOPMENT	GOBP_BONE_CELL_DEVELOPMENT		34	-0.533565	-1.65927	0.0117647	0.0162474	1	2757	tags=44%, list=20%, signal=55%
GOBP_PROTEIN_KINASE_C_SIGNALING	GOBP_PROTEIN_KINASE_C_SIGNALING		29	-0.551893	-1.65858	0.00383142	0.0163294	1	4025	tags=55%, list=30%, signal=78%
GOBP_CATECHOL_CONTAINING_COMPOUND_METABOLIC_PROCESS	GOBP_CATECHOL_CONTAINING_COMPOUND_METABOLIC_PROCESS		42	-0.511578	-1.65847	0.00392927	0.0163372	1	2442	tags=36%, list=18%, signal=43%
GOBP_LYMPHOID_PROGENITOR_CELL_DIFFERENTIATION	GOBP_LYMPHOID_PROGENITOR_CELL_DIFFERENTIATION		19	-0.610638	-1.65832	0.00792079	0.0163448	1	2577	tags=47%, list=19%, signal=58%
GOMF_PEPTIDE_RECEPTOR_ACTIVITY	GOMF_PEPTIDE_RECEPTOR_ACTIVITY		63	-0.483607	-1.65733	0.00181159	0.0164905	1	2988	tags=40%, list=22%, signal=51%
GOBP_CELLULAR_RESPONSE_TO_ALCOHOL	GOBP_CELLULAR_RESPONSE_TO_ALCOHOL		69	-0.468795	-1.65705	0.00192308	0.016536	1	3301	tags=35%, list=24%, signal=46%
GOBP_REGULATION_OF_LYASE_ACTIVITY	GOBP_REGULATION_OF_LYASE_ACTIVITY		39	-0.522085	-1.65612	0.0095057	0.0166513	1	1771	tags=33%, list=13%, signal=38%
GOBP_ARF_PROTEIN_SIGNAL_TRANSDUCTION	GOBP_ARF_PROTEIN_SIGNAL_TRANSDUCTION		18	-0.624533	-1.65552	0.0135397	0.0167266	1	2902	tags=50%, list=21%, signal=64%
GOBP_CARDIAC_MUSCLE_TISSUE_MORPHOGENESIS	GOBP_CARDIAC_MUSCLE_TISSUE_MORPHOGENESIS		49	-0.504774	-1.65537	0	0.0167339	1	2757	tags=39%, list=20%, signal=48%
GOBP_HEAT_GENERATION	GOBP_HEAT_GENERATION		19	-0.606671	-1.65556	0.00905797	0.0167372	1	1463	tags=26%, list=11%, signal=29%
GOBP_LYMPHANGIOGENESIS	GOBP_LYMPHANGIOGENESIS		18	-0.625597	-1.65468	0.0168224	0.0168255	1	2832	tags=61%, list=21%, signal=77%
GOBP_POSITIVE_REGULATION_OF_WNT_SIGNALING_PATHWAY	GOBP_POSITIVE_REGULATION_OF_WNT_SIGNALING_PATHWAY		118	-0.434236	-1.65477	0	0.0168306	1	3882	tags=44%, list=29%, signal=61%
GOBP_POSITIVE_REGULATION_OF_MAP_KINASE_ACTIVITY	GOBP_POSITIVE_REGULATION_OF_MAP_KINASE_ACTIVITY		115	-0.43192	-1.65417	0	0.0168865	1	3060	tags=32%, list=23%, signal=41%
GOCC_GTPASE_COMPLEX	GOCC_GTPASE_COMPLEX		30	-0.551643	-1.65425	0.0118577	0.0168928	1	2620	tags=47%, list=19%, signal=58%
GOCC_NON_MOTILE_CILIUM	GOCC_NON_MOTILE_CILIUM		98	-0.445495	-1.65061	0.00383142	0.0174538	1	2575	tags=33%, list=19%, signal=40%
GOBP_NEUROINFLAMMATORY_RESPONSE	GOBP_NEUROINFLAMMATORY_RESPONSE		52	-0.491955	-1.64995	0.0018622	0.0175132	1	1529	tags=23%, list=11%, signal=26%
GOBP_NEGATIVE_REGULATION_OF_SODIUM_ION_TRANSPORT	GOBP_NEGATIVE_REGULATION_OF_SODIUM_ION_TRANSPORT		18	-0.624222	-1.65	0.00919118	0.0175189	1	3201	tags=72%, list=24%, signal=94%
GOBP_POSITIVE_REGULATION_OF_FILOPODIUM_ASSEMBLY	GOBP_POSITIVE_REGULATION_OF_FILOPODIUM_ASSEMBLY		30	-0.553774	-1.64974	0.00715563	0.017521	1	3724	tags=60%, list=27%, signal=83%
GOBP_MEGAKARYOCYTE_DEVELOPMENT	GOBP_MEGAKARYOCYTE_DEVELOPMENT		21	-0.592885	-1.65018	0.00589391	0.0175259	1	4561	tags=71%, list=34%, signal=107%
GOBP_NEPHRON_EPITHELIUM_DEVELOPMENT	GOBP_NEPHRON_EPITHELIUM_DEVELOPMENT		90	-0.445632	-1.65007	0.00184843	0.0175291	1	3991	tags=46%, list=29%, signal=64%
GOBP_CELL_MIGRATION_INVOLVED_IN_HEART_DEVELOPMENT	GOBP_CELL_MIGRATION_INVOLVED_IN_HEART_DEVELOPMENT		18	-0.635999	-1.6495	0.014	0.0175353	1	2577	tags=56%, list=19%, signal=68%
GOBP_VASCULOGENESIS	GOBP_VASCULOGENESIS		79	-0.463729	-1.64911	0	0.0175679	1	3812	tags=42%, list=28%, signal=58%
GOBP_CELLULAR_SODIUM_ION_HOMEOSTASIS	GOBP_CELLULAR_SODIUM_ION_HOMEOSTASIS		19	-0.630054	-1.64925	0.00967118	0.0175692	1	2732	tags=47%, list=20%, signal=59%
GOBP_CATECHOL_CONTAINING_COMPOUND_BIOSYNTHETIC_PROCESS	GOBP_CATECHOL_CONTAINING_COMPOUND_BIOSYNTHETIC_PROCESS		18	-0.62342	-1.64846	0.0166976	0.0176483	1	2250	tags=39%, list=17%, signal=47%
GOBP_POSITIVE_REGULATION_OF_PEPTIDYL_SERINE_PHOSPHORYLATION	GOBP_POSITIVE_REGULATION_OF_PEPTIDYL_SERINE_PHOSPHORYLATION		87	-0.455392	-1.64743	0	0.0177954	1	2848	tags=31%, list=21%, signal=39%
GOBP_PEPTIDYL_TYROSINE_DEPHOSPHORYLATION	GOBP_PEPTIDYL_TYROSINE_DEPHOSPHORYLATION		29	-0.557946	-1.64745	0.0131332	0.0178079	1	2419	tags=31%, list=18%, signal=38%
GOMF_TRANSFORMING_GROWTH_FACTOR_BETA_BINDING	GOMF_TRANSFORMING_GROWTH_FACTOR_BETA_BINDING		22	-0.59778	-1.64647	0.0170778	0.0179296	1	4336	tags=73%, list=32%, signal=107%
GOBP_MORPHOGENESIS_OF_AN_EPITHELIAL_SHEET	GOBP_MORPHOGENESIS_OF_AN_EPITHELIAL_SHEET		52	-0.496983	-1.64631	0.00390625	0.0179356	1	2177	tags=33%, list=16%, signal=39%
GOBP_HEART_TRABECULA_MORPHOGENESIS	GOBP_HEART_TRABECULA_MORPHOGENESIS		33	-0.540618	-1.64573	0.00549451	0.018024	1	2642	tags=33%, list=19%, signal=41%
GOBP_PROTEIN_CONTAINING_COMPLEX_DISASSEMBLY	GOBP_PROTEIN_CONTAINING_COMPLEX_DISASSEMBLY		208	-0.404076	-1.64557	0	0.0180367	1	2199	tags=28%, list=16%, signal=33%
GOBP_POSITIVE_REGULATION_OF_RHO_PROTEIN_SIGNAL_TRANSDUCTION	GOBP_POSITIVE_REGULATION_OF_RHO_PROTEIN_SIGNAL_TRANSDUCTION		25	-0.569876	-1.6453	0.0112782	0.0180568	1	4116	tags=52%, list=30%, signal=75%
GOBP_DETECTION_OF_LIGHT_STIMULUS	GOBP_DETECTION_OF_LIGHT_STIMULUS		19	-0.61484	-1.64503	0.00994036	0.0180912	1	1203	tags=26%, list=9%, signal=29%
GOBP_RESPONSE_TO_CARBOHYDRATE	GOBP_RESPONSE_TO_CARBOHYDRATE		166	-0.412969	-1.6446	0	0.0181457	1	1658	tags=24%, list=12%, signal=27%
GOBP_PEPTIDYL_TYROSINE_MODIFICATION	GOBP_PEPTIDYL_TYROSINE_MODIFICATION		258	-0.394614	-1.64465	0	0.0181498	1	3086	tags=30%, list=23%, signal=38%
GOBP_VESICLE_DOCKING	GOBP_VESICLE_DOCKING		61	-0.488333	-1.6442	0.00190114	0.0182108	1	2417	tags=33%, list=18%, signal=40%
GOBP_RESPONSE_TO_COCAINE	GOBP_RESPONSE_TO_COCAINE		24	-0.597436	-1.64351	0.00931099	0.0183103	1	2442	tags=54%, list=18%, signal=66%
GOMF_SOLUTE_CATION_ANTIPORTER_ACTIVITY	GOMF_SOLUTE_CATION_ANTIPORTER_ACTIVITY		19	-0.619222	-1.64147	0.00188324	0.0186621	1	2205	tags=37%, list=16%, signal=44%
GOMF_PHOSPHOPROTEIN_BINDING	GOMF_PHOSPHOPROTEIN_BINDING		97	-0.445597	-1.6411	0	0.0187121	1	3643	tags=45%, list=27%, signal=62%
GOBP_BLOOD_VESSEL_ENDOTHELIAL_CELL_MIGRATION	GOBP_BLOOD_VESSEL_ENDOTHELIAL_CELL_MIGRATION		113	-0.429808	-1.64001	0.00541516	0.0189169	1	4045	tags=42%, list=30%, signal=60%
GOBP_INNER_EAR_MORPHOGENESIS	GOBP_INNER_EAR_MORPHOGENESIS		78	-0.454638	-1.63902	0.00188679	0.0190542	1	3130	tags=37%, list=23%, signal=48%
GOBP_REGULATION_OF_NEUROTROPHIN_TRK_RECEPTOR_SIGNALING_PATHWAY	GOBP_REGULATION_OF_NEUROTROPHIN_TRK_RECEPTOR_SIGNALING_PATHWAY		17	-0.63428	-1.63907	0.00974659	0.0190633	1	1483	tags=29%, list=11%, signal=33%
GOMF_GLYCOSAMINOGLYCAN_BINDING	GOMF_GLYCOSAMINOGLYCAN_BINDING		157	-0.416986	-1.6388	0	0.0190766	1	2462	tags=35%, list=18%, signal=42%
GOBP_POSITIVE_REGULATION_OF_HORMONE_SECRETION	GOBP_POSITIVE_REGULATION_OF_HORMONE_SECRETION		119	-0.428617	-1.63841	0	0.0191392	1	3546	tags=39%, list=26%, signal=53%
GOBP_INSULIN_RECEPTOR_SIGNALING_PATHWAY	GOBP_INSULIN_RECEPTOR_SIGNALING_PATHWAY		104	-0.441609	-1.6383	0.00185185	0.0191495	1	3788	tags=43%, list=28%, signal=60%
GOBP_REGULATION_OF_SMAD_PROTEIN_SIGNAL_TRANSDUCTION	GOBP_REGULATION_OF_SMAD_PROTEIN_SIGNAL_TRANSDUCTION		27	-0.555862	-1.63736	0.0094518	0.0193002	1	3003	tags=41%, list=22%, signal=52%
GOBP_NEGATIVE_REGULATION_OF_POTASSIUM_ION_TRANSMEMBRANE_TRANSPORT	GOBP_NEGATIVE_REGULATION_OF_POTASSIUM_ION_TRANSMEMBRANE_TRANSPORT		22	-0.590848	-1.63662	0.00943396	0.0194132	1	3166	tags=64%, list=23%, signal=83%
GOMF_GTPASE_ACTIVATING_PROTEIN_BINDING	GOMF_GTPASE_ACTIVATING_PROTEIN_BINDING		20	-0.597589	-1.63601	0.012939	0.0194938	1	3465	tags=45%, list=26%, signal=60%
GOBP_PHENOL_CONTAINING_COMPOUND_BIOSYNTHETIC_PROCESS	GOBP_PHENOL_CONTAINING_COMPOUND_BIOSYNTHETIC_PROCESS		34	-0.527968	-1.63578	0.00899281	0.0195059	1	2540	tags=35%, list=19%, signal=43%
GOBP_EMBRYONIC_HEMOPOIESIS	GOBP_EMBRYONIC_HEMOPOIESIS		27	-0.562103	-1.63542	0.00967118	0.0195514	1	2757	tags=41%, list=20%, signal=51%
GOCC_EXTRINSIC_COMPONENT_OF_ORGANELLE_MEMBRANE	GOCC_EXTRINSIC_COMPONENT_OF_ORGANELLE_MEMBRANE		51	-0.499074	-1.63506	0.0056391	0.0195552	1	1121	tags=25%, list=8%, signal=28%
GOCC_EXTRINSIC_COMPONENT_OF_SYNAPTIC_MEMBRANE	GOCC_EXTRINSIC_COMPONENT_OF_SYNAPTIC_MEMBRANE		22	-0.588009	-1.63511	0.0194175	0.0195658	1	3045	tags=64%, list=22%, signal=82%
GOBP_REGULATION_OF_ACTOMYOSIN_STRUCTURE_ORGANIZATION	GOBP_REGULATION_OF_ACTOMYOSIN_STRUCTURE_ORGANIZATION		100	-0.443959	-1.63513	0	0.0195796	1	3724	tags=46%, list=27%, signal=63%
GOBP_NEGATIVE_REGULATION_OF_MUSCLE_CONTRACTION	GOBP_NEGATIVE_REGULATION_OF_MUSCLE_CONTRACTION		25	-0.574723	-1.63454	0.00990099	0.0196468	1	2659	tags=44%, list=20%, signal=55%
GOMF_ATPASE_COUPLED_INTRAMEMBRANE_LIPID_TRANSPORTER_ACTIVITY	GOMF_ATPASE_COUPLED_INTRAMEMBRANE_LIPID_TRANSPORTER_ACTIVITY		23	-0.584812	-1.63395	0.00585938	0.0197263	1	3337	tags=48%, list=25%, signal=63%
GOBP_AMYLOID_PRECURSOR_PROTEIN_CATABOLIC_PROCESS	GOBP_AMYLOID_PRECURSOR_PROTEIN_CATABOLIC_PROCESS		53	-0.493238	-1.63343	0.00367647	0.019793	1	3665	tags=45%, list=27%, signal=62%
GOBP_POSITIVE_REGULATION_OF_ACTIN_CYTOSKELETON_REORGANIZATION	GOBP_POSITIVE_REGULATION_OF_ACTIN_CYTOSKELETON_REORGANIZATION		17	-0.619986	-1.63247	0.00588235	0.0199423	1	1266	tags=24%, list=9%, signal=26%
GOBP_PROTEIN_CONTAINING_COMPLEX_LOCALIZATION	GOBP_PROTEIN_CONTAINING_COMPLEX_LOCALIZATION		182	-0.401818	-1.6316	0.00179533	0.0200837	1	2615	tags=32%, list=19%, signal=39%
GOBP_CIRCADIAN_RHYTHM	GOBP_CIRCADIAN_RHYTHM		173	-0.403502	-1.63144	0	0.02009	1	3844	tags=47%, list=28%, signal=65%
GOBP_LENS_MORPHOGENESIS_IN_CAMERA_TYPE_EYE	GOBP_LENS_MORPHOGENESIS_IN_CAMERA_TYPE_EYE		19	-0.608174	-1.63053	0.0149254	0.0202433	1	2577	tags=37%, list=19%, signal=45%
GOBP_PLATELET_ACTIVATION	GOBP_PLATELET_ACTIVATION		71	-0.461872	-1.63055	0	0.0202566	1	4260	tags=51%, list=31%, signal=74%
GOBP_REGULATION_OF_THE_FORCE_OF_HEART_CONTRACTION	GOBP_REGULATION_OF_THE_FORCE_OF_HEART_CONTRACTION		23	-0.5829	-1.63022	0.019084	0.0202581	1	2234	tags=39%, list=16%, signal=47%
GOBP_NEGATIVE_REGULATION_OF_NERVOUS_SYSTEM_PROCESS	GOBP_NEGATIVE_REGULATION_OF_NERVOUS_SYSTEM_PROCESS		18	-0.614368	-1.63027	0.0159681	0.0202649	1	2104	tags=44%, list=16%, signal=53%
GOBP_MECHANORECEPTOR_DIFFERENTIATION	GOBP_MECHANORECEPTOR_DIFFERENTIATION		68	-0.465489	-1.63032	0.00371058	0.0202718	1	3694	tags=41%, list=27%, signal=56%
GOMF_PHOSPHATIDYLINOSITOL_BINDING	GOMF_PHOSPHATIDYLINOSITOL_BINDING		229	-0.392306	-1.62996	0	0.0203014	1	3425	tags=32%, list=25%, signal=42%
GOBP_REGULATION_OF_CELL_MORPHOGENESIS_INVOLVED_IN_DIFFERENTIATION	GOBP_REGULATION_OF_CELL_MORPHOGENESIS_INVOLVED_IN_DIFFERENTIATION		106	-0.435603	-1.62964	0	0.0203181	1	3251	tags=34%, list=24%, signal=44%
GOBP_NEGATIVE_REGULATION_OF_PLATELET_ACTIVATION	GOBP_NEGATIVE_REGULATION_OF_PLATELET_ACTIVATION		17	-0.635862	-1.62972	0.00954198	0.0203275	1	4260	tags=71%, list=31%, signal=103%
GOBP_MICROTUBULE_POLYMERIZATION_OR_DEPOLYMERIZATION	GOBP_MICROTUBULE_POLYMERIZATION_OR_DEPOLYMERIZATION		109	-0.43308	-1.62966	0	0.0203313	1	2755	tags=40%, list=20%, signal=50%
GOMF_CHLORIDE_TRANSMEMBRANE_TRANSPORTER_ACTIVITY	GOMF_CHLORIDE_TRANSMEMBRANE_TRANSPORTER_ACTIVITY		53	-0.485234	-1.62927	0.00894454	0.0203762	1	1128	tags=15%, list=8%, signal=16%
GOMF_G_PROTEIN_BETA_GAMMA_SUBUNIT_COMPLEX_BINDING	GOMF_G_PROTEIN_BETA_GAMMA_SUBUNIT_COMPLEX_BINDING		18	-0.616869	-1.62915	0.00968992	0.0203895	1	2620	tags=50%, list=19%, signal=62%
GOMF_TUBULIN_BINDING	GOMF_TUBULIN_BINDING		304	-0.382839	-1.62778	0	0.0206795	1	2633	tags=33%, list=19%, signal=40%
GOBP_POSITIVE_REGULATION_OF_SUPRAMOLECULAR_FIBER_ORGANIZATION	GOBP_POSITIVE_REGULATION_OF_SUPRAMOLECULAR_FIBER_ORGANIZATION		154	-0.413886	-1.62677	0	0.0208758	1	3521	tags=39%, list=26%, signal=52%
GOBP_NEGATIVE_REGULATION_OF_EPITHELIAL_CELL_APOPTOTIC_PROCESS	GOBP_NEGATIVE_REGULATION_OF_EPITHELIAL_CELL_APOPTOTIC_PROCESS		57	-0.47985	-1.62659	0	0.0208991	1	3668	tags=51%, list=27%, signal=69%
GOBP_CORTICOSTEROID_HORMONE_SECRETION	GOBP_CORTICOSTEROID_HORMONE_SECRETION		16	-0.627716	-1.62617	0.0309478	0.0209754	1	2968	tags=56%, list=22%, signal=72%
GOBP_NEGATIVE_REGULATION_OF_RHO_PROTEIN_SIGNAL_TRANSDUCTION	GOBP_NEGATIVE_REGULATION_OF_RHO_PROTEIN_SIGNAL_TRANSDUCTION		20	-0.600861	-1.62528	0.0199203	0.0211416	1	2659	tags=45%, list=20%, signal=56%
GOBP_NEGATIVE_REGULATION_OF_DENDRITIC_SPINE_DEVELOPMENT	GOBP_NEGATIVE_REGULATION_OF_DENDRITIC_SPINE_DEVELOPMENT		17	-0.623938	-1.62478	0.0304183	0.0212239	1	3846	tags=71%, list=28%, signal=98%
GOBP_OLFACTORY_LOBE_DEVELOPMENT	GOBP_OLFACTORY_LOBE_DEVELOPMENT		28	-0.552143	-1.62458	0.0135659	0.0212437	1	1960	tags=36%, list=14%, signal=42%
GOBP_ESTABLISHMENT_OR_MAINTENANCE_OF_CELL_POLARITY	GOBP_ESTABLISHMENT_OR_MAINTENANCE_OF_CELL_POLARITY		198	-0.39783	-1.62448	0	0.0212528	1	3374	tags=39%, list=25%, signal=52%
GOBP_ACTIN_POLYMERIZATION_OR_DEPOLYMERIZATION	GOBP_ACTIN_POLYMERIZATION_OR_DEPOLYMERIZATION		156	-0.410996	-1.62265	0	0.0216155	1	2251	tags=27%, list=17%, signal=32%
GOBP_REGULATION_OF_MEMBRANE_INVAGINATION	GOBP_REGULATION_OF_MEMBRANE_INVAGINATION		18	-0.610877	-1.62266	0.0224299	0.0216329	1	2786	tags=44%, list=21%, signal=56%
GOBP_REGULATION_OF_ESTABLISHMENT_OF_PLANAR_POLARITY	GOBP_REGULATION_OF_ESTABLISHMENT_OF_PLANAR_POLARITY		37	-0.519491	-1.62187	0.00959693	0.0216955	1	2463	tags=30%, list=18%, signal=36%
GOBP_HEPARAN_SULFATE_PROTEOGLYCAN_METABOLIC_PROCESS	GOBP_HEPARAN_SULFATE_PROTEOGLYCAN_METABOLIC_PROCESS		34	-0.517951	-1.622	0.00587084	0.0217071	1	2281	tags=21%, list=17%, signal=25%
GOBP_SKELETAL_MUSCLE_CONTRACTION	GOBP_SKELETAL_MUSCLE_CONTRACTION		21	-0.592498	-1.62188	0.00968992	0.0217139	1	4438	tags=57%, list=33%, signal=85%
GOBP_HEART_GROWTH	GOBP_HEART_GROWTH		94	-0.439752	-1.62203	0	0.0217182	1	2765	tags=37%, list=20%, signal=46%
GOBP_CARBOHYDRATE_TRANSMEMBRANE_TRANSPORT	GOBP_CARBOHYDRATE_TRANSMEMBRANE_TRANSPORT		90	-0.439151	-1.62162	0.0037594	0.021719	1	3650	tags=39%, list=27%, signal=53%
GOBP_REGULATION_OF_ACTIN_FILAMENT_BUNDLE_ASSEMBLY	GOBP_REGULATION_OF_ACTIN_FILAMENT_BUNDLE_ASSEMBLY		104	-0.434522	-1.6213	0.00184162	0.021777	1	3393	tags=43%, list=25%, signal=57%
GOBP_RENAL_TUBULE_MORPHOGENESIS	GOBP_RENAL_TUBULE_MORPHOGENESIS		71	-0.458373	-1.62095	0.00189394	0.0218257	1	2971	tags=34%, list=22%, signal=43%
GOBP_REGULATION_OF_NEUROBLAST_PROLIFERATION	GOBP_REGULATION_OF_NEUROBLAST_PROLIFERATION		33	-0.540763	-1.61996	0.00922509	0.0220118	1	2832	tags=36%, list=21%, signal=46%
GOBP_POSITIVE_REGULATION_OF_CATECHOLAMINE_SECRETION	GOBP_POSITIVE_REGULATION_OF_CATECHOLAMINE_SECRETION		16	-0.64635	-1.61974	0.00957854	0.0220298	1	2904	tags=56%, list=21%, signal=71%
GOBP_NEGATIVE_REGULATION_OF_SYSTEMIC_ARTERIAL_BLOOD_PRESSURE	GOBP_NEGATIVE_REGULATION_OF_SYSTEMIC_ARTERIAL_BLOOD_PRESSURE		21	-0.605027	-1.61821	0.0178571	0.0223442	1	2659	tags=48%, list=20%, signal=59%
GOMF_PHOSPHATIDYLINOSITOL_PHOSPHATE_PHOSPHATASE_ACTIVITY	GOMF_PHOSPHATIDYLINOSITOL_PHOSPHATE_PHOSPHATASE_ACTIVITY		27	-0.546597	-1.61789	0.0160321	0.0223765	1	1951	tags=26%, list=14%, signal=30%
GOBP_MITOCHONDRION_LOCALIZATION	GOBP_MITOCHONDRION_LOCALIZATION		43	-0.503348	-1.61757	0.00957854	0.0224264	1	2400	tags=37%, list=18%, signal=45%
GOBP_REGULATION_OF_PROTEIN_LOCALIZATION_TO_CELL_PERIPHERY	GOBP_REGULATION_OF_PROTEIN_LOCALIZATION_TO_CELL_PERIPHERY		122	-0.419715	-1.6168	0.00180505	0.0225717	1	3382	tags=40%, list=25%, signal=53%
GOBP_EMBRYONIC_HEART_TUBE_DEVELOPMENT	GOBP_EMBRYONIC_HEART_TUBE_DEVELOPMENT		66	-0.470442	-1.61626	0.00376648	0.0226721	1	3519	tags=44%, list=26%, signal=59%
GOBP_REGULATION_OF_RYANODINE_SENSITIVE_CALCIUM_RELEASE_CHANNEL_ACTIVITY	GOBP_REGULATION_OF_RYANODINE_SENSITIVE_CALCIUM_RELEASE_CHANNEL_ACTIVITY		17	-0.606142	-1.61609	0.027027	0.0226874	1	2917	tags=59%, list=21%, signal=75%
GOBP_PHASIC_SMOOTH_MUSCLE_CONTRACTION	GOBP_PHASIC_SMOOTH_MUSCLE_CONTRACTION		19	-0.618081	-1.61554	0.0140845	0.0227677	1	3130	tags=58%, list=23%, signal=75%
GOMF_SOLUTE_CATION_SYMPORTER_ACTIVITY	GOMF_SOLUTE_CATION_SYMPORTER_ACTIVITY		55	-0.475949	-1.61561	0.011194	0.0227754	1	2438	tags=29%, list=18%, signal=35%
GOBP_INOSITOL_PHOSPHATE_BIOSYNTHETIC_PROCESS	GOBP_INOSITOL_PHOSPHATE_BIOSYNTHETIC_PROCESS		21	-0.593674	-1.61504	0.0176471	0.0228523	1	3796	tags=48%, list=28%, signal=66%
GOBP_HEART_FORMATION	GOBP_HEART_FORMATION		24	-0.567712	-1.61454	0.0165441	0.0229241	1	3010	tags=50%, list=22%, signal=64%
GOBP_DOPAMINE_METABOLIC_PROCESS	GOBP_DOPAMINE_METABOLIC_PROCESS		31	-0.538106	-1.61432	0.0127932	0.0229252	1	2442	tags=42%, list=18%, signal=51%
GOMF_CALMODULIN_DEPENDENT_PROTEIN_KINASE_ACTIVITY	GOMF_CALMODULIN_DEPENDENT_PROTEIN_KINASE_ACTIVITY		20	-0.587425	-1.61433	0.0176125	0.0229444	1	3340	tags=40%, list=25%, signal=53%
GOMF_14_3_3_PROTEIN_BINDING	GOMF_14_3_3_PROTEIN_BINDING		38	-0.512815	-1.61301	0.0132325	0.0231608	1	1257	tags=24%, list=9%, signal=26%
GOBP_MONOVALENT_INORGANIC_CATION_HOMEOSTASIS	GOBP_MONOVALENT_INORGANIC_CATION_HOMEOSTASIS		120	-0.42278	-1.61304	0.00182149	0.023176	1	3076	tags=31%, list=23%, signal=40%
GOBP_CAMERA_TYPE_EYE_PHOTORECEPTOR_CELL_DIFFERENTIATION	GOBP_CAMERA_TYPE_EYE_PHOTORECEPTOR_CELL_DIFFERENTIATION		24	-0.576591	-1.61308	0.0197239	0.0231902	1	3516	tags=63%, list=26%, signal=84%
GOBP_PHOSPHOLIPASE_C_ACTIVATING_G_PROTEIN_COUPLED_RECEPTOR_SIGNALING_PATHWAY	GOBP_PHOSPHOLIPASE_C_ACTIVATING_G_PROTEIN_COUPLED_RECEPTOR_SIGNALING_PATHWAY		53	-0.47982	-1.6125	0.0124555	0.023265	1	2968	tags=32%, list=22%, signal=41%
GOBP_POSITIVE_REGULATION_OF_STEROL_TRANSPORT	GOBP_POSITIVE_REGULATION_OF_STEROL_TRANSPORT		34	-0.522167	-1.61132	0.0107527	0.0234987	1	1414	tags=21%, list=10%, signal=23%
GOBP_REGIONALIZATION	GOBP_REGIONALIZATION		250	-0.386303	-1.61085	0	0.023582	1	3752	tags=39%, list=28%, signal=53%
GOBP_NEUROTRANSMITTER_METABOLIC_PROCESS	GOBP_NEUROTRANSMITTER_METABOLIC_PROCESS		21	-0.591077	-1.61012	0.0156556	0.0236907	1	2442	tags=52%, list=18%, signal=64%
GOMF_NUCLEAR_RECEPTOR_ACTIVITY	GOMF_NUCLEAR_RECEPTOR_ACTIVITY		42	-0.504055	-1.61017	0.00580271	0.0237032	1	2559	tags=33%, list=19%, signal=41%
GOBP_CD4_POSITIVE_OR_CD8_POSITIVE_ALPHA_BETA_T_CELL_LINEAGE_COMMITMENT	GOBP_CD4_POSITIVE_OR_CD8_POSITIVE_ALPHA_BETA_T_CELL_LINEAGE_COMMITMENT		16	-0.630996	-1.61024	0.0241187	0.0237075	1	3842	tags=56%, list=28%, signal=78%
GOBP_LIPID_EXPORT_FROM_CELL	GOBP_LIPID_EXPORT_FROM_CELL		42	-0.502003	-1.60945	0.0130354	0.0237847	1	2968	tags=33%, list=22%, signal=43%
GOBP_POSITIVE_REGULATION_OF_CELL_SUBSTRATE_JUNCTION_ORGANIZATION	GOBP_POSITIVE_REGULATION_OF_CELL_SUBSTRATE_JUNCTION_ORGANIZATION		30	-0.545342	-1.60935	0.0135397	0.0237865	1	3552	tags=53%, list=26%, signal=72%
GOBP_VENTRICULAR_CARDIAC_MUSCLE_TISSUE_DEVELOPMENT	GOBP_VENTRICULAR_CARDIAC_MUSCLE_TISSUE_DEVELOPMENT		46	-0.501219	-1.60951	0.00553506	0.0237881	1	4098	tags=57%, list=30%, signal=81%
GOBP_NEGATIVE_REGULATION_OF_PROTEIN_CONTAINING_COMPLEX_ASSEMBLY	GOBP_NEGATIVE_REGULATION_OF_PROTEIN_CONTAINING_COMPLEX_ASSEMBLY		126	-0.418909	-1.60909	0	0.0238271	1	2686	tags=37%, list=20%, signal=45%
GOBP_HAIR_CYCLE_PHASE	GOBP_HAIR_CYCLE_PHASE		15	-0.634935	-1.60782	0.0295858	0.0241021	1	2154	tags=33%, list=16%, signal=40%
GOBP_NEGATIVE_REGULATION_OF_LIPID_CATABOLIC_PROCESS	GOBP_NEGATIVE_REGULATION_OF_LIPID_CATABOLIC_PROCESS		19	-0.604457	-1.60686	0.0204461	0.0242202	1	2465	tags=47%, list=18%, signal=58%
GOBP_NEGATIVE_REGULATION_OF_COAGULATION	GOBP_NEGATIVE_REGULATION_OF_COAGULATION		35	-0.522832	-1.60713	0.0056391	0.0242209	1	4037	tags=51%, list=30%, signal=73%
GOMF_IONOTROPIC_GLUTAMATE_RECEPTOR_BINDING	GOMF_IONOTROPIC_GLUTAMATE_RECEPTOR_BINDING		30	-0.533029	-1.6069	0.0136452	0.0242309	1	3391	tags=60%, list=25%, signal=80%
GOBP_NEGATIVE_REGULATION_OF_CATION_CHANNEL_ACTIVITY	GOBP_NEGATIVE_REGULATION_OF_CATION_CHANNEL_ACTIVITY		41	-0.50615	-1.60691	0.0111111	0.0242488	1	1737	tags=32%, list=13%, signal=36%
GOBP_CHONDROCYTE_DEVELOPMENT	GOBP_CHONDROCYTE_DEVELOPMENT		25	-0.556545	-1.60643	0.0135922	0.0242999	1	3463	tags=52%, list=26%, signal=70%
GOBP_FOREBRAIN_GENERATION_OF_NEURONS	GOBP_FOREBRAIN_GENERATION_OF_NEURONS		37	-0.508504	-1.60522	0.00738007	0.0245414	1	2358	tags=46%, list=17%, signal=55%
GOBP_NEGATIVE_REGULATION_OF_PROTEIN_POLYMERIZATION	GOBP_NEGATIVE_REGULATION_OF_PROTEIN_POLYMERIZATION		69	-0.457737	-1.60384	0	0.0248328	1	2686	tags=39%, list=20%, signal=49%
GOBP_OSTEOCLAST_DIFFERENTIATION	GOBP_OSTEOCLAST_DIFFERENTIATION		88	-0.437711	-1.60323	0.00372439	0.0249485	1	2676	tags=31%, list=20%, signal=38%
GOBP_REGULATION_OF_POSTSYNAPTIC_DENSITY_ORGANIZATION	GOBP_REGULATION_OF_POSTSYNAPTIC_DENSITY_ORGANIZATION		16	-0.638996	-1.60201	0.0236686	0.0251685	1	1806	tags=44%, list=13%, signal=50%
GOBP_REGULATION_OF_PLATELET_AGGREGATION	GOBP_REGULATION_OF_PLATELET_AGGREGATION		24	-0.570393	-1.60203	0.0163636	0.025185	1	4260	tags=63%, list=31%, signal=91%
GOBP_POSITIVE_REGULATION_OF_MYELINATION	GOBP_POSITIVE_REGULATION_OF_MYELINATION		17	-0.619559	-1.60211	0.0209125	0.0251895	1	3732	tags=59%, list=28%, signal=81%
GOBP_VENOUS_BLOOD_VESSEL_DEVELOPMENT	GOBP_VENOUS_BLOOD_VESSEL_DEVELOPMENT		17	-0.621253	-1.60147	0.023166	0.0252375	1	3309	tags=59%, list=24%, signal=78%
GOBP_REGULATION_OF_HOMOTYPIC_CELL_CELL_ADHESION	GOBP_REGULATION_OF_HOMOTYPIC_CELL_CELL_ADHESION		34	-0.524728	-1.60157	0.00811359	0.02524	1	4434	tags=53%, list=33%, signal=78%
GOBP_NEGATIVE_REGULATION_OF_HOMOTYPIC_CELL_CELL_ADHESION	GOBP_NEGATIVE_REGULATION_OF_HOMOTYPIC_CELL_CELL_ADHESION		18	-0.619309	-1.6013	0.0196464	0.0252574	1	2916	tags=44%, list=21%, signal=57%
GOBP_ACTIN_FILAMENT_BASED_TRANSPORT	GOBP_ACTIN_FILAMENT_BASED_TRANSPORT		20	-0.591762	-1.60066	0.0208333	0.0253813	1	59	tags=10%, list=0%, signal=10%
GOBP_RAB_PROTEIN_SIGNAL_TRANSDUCTION	GOBP_RAB_PROTEIN_SIGNAL_TRANSDUCTION		17	-0.614049	-1.60047	0.0275049	0.0254029	1	3576	tags=65%, list=26%, signal=88%
GOMF_ADRENERGIC_RECEPTOR_BINDING	GOMF_ADRENERGIC_RECEPTOR_BINDING		22	-0.573995	-1.59988	0.0192308	0.0255272	1	2565	tags=55%, list=19%, signal=67%
GOBP_CILIUM_MOVEMENT	GOBP_CILIUM_MOVEMENT		63	-0.464068	-1.59972	0.00579151	0.0255395	1	3259	tags=40%, list=24%, signal=52%
GOBP_REGULATION_OF_DIGESTIVE_SYSTEM_PROCESS	GOBP_REGULATION_OF_DIGESTIVE_SYSTEM_PROCESS		34	-0.528561	-1.59942	0.00718133	0.0255881	1	2041	tags=26%, list=15%, signal=31%
GOBP_TRABECULA_FORMATION	GOBP_TRABECULA_FORMATION		24	-0.557483	-1.59881	0.0148148	0.0256924	1	4256	tags=50%, list=31%, signal=73%
GOBP_CELL_CELL_JUNCTION_ORGANIZATION	GOBP_CELL_CELL_JUNCTION_ORGANIZATION		167	-0.398602	-1.59887	0	0.0256972	1	3215	tags=28%, list=24%, signal=36%
GOBP_POSITIVE_REGULATION_OF_PROTEIN_LOCALIZATION_TO_CELL_PERIPHERY	GOBP_POSITIVE_REGULATION_OF_PROTEIN_LOCALIZATION_TO_CELL_PERIPHERY		61	-0.470708	-1.5982	0.0037037	0.0257851	1	2922	tags=36%, list=22%, signal=46%
GOBP_REGULATION_OF_VASCULATURE_DEVELOPMENT	GOBP_REGULATION_OF_VASCULATURE_DEVELOPMENT		239	-0.383054	-1.59836	0	0.0257878	1	3765	tags=38%, list=28%, signal=52%
GOBP_REGULATION_OF_CALCINEURIN_MEDIATED_SIGNALING	GOBP_REGULATION_OF_CALCINEURIN_MEDIATED_SIGNALING		34	-0.515383	-1.59821	0.0174419	0.025806	1	2606	tags=38%, list=19%, signal=47%
GOBP_MYOTUBE_DIFFERENTIATION	GOBP_MYOTUBE_DIFFERENTIATION		94	-0.431622	-1.59782	0	0.0258066	1	3672	tags=43%, list=27%, signal=58%
GOBP_POSITIVE_REGULATION_OF_EXOCYTOSIS	GOBP_POSITIVE_REGULATION_OF_EXOCYTOSIS		78	-0.447089	-1.59784	0.00178253	0.0258215	1	2001	tags=26%, list=15%, signal=30%
GOBP_PLASMA_MEMBRANE_ORGANIZATION	GOBP_PLASMA_MEMBRANE_ORGANIZATION		117	-0.416968	-1.59785	0	0.0258394	1	2466	tags=24%, list=18%, signal=29%
GOCC_CILIARY_TRANSITION_ZONE	GOCC_CILIARY_TRANSITION_ZONE		55	-0.473561	-1.59708	0.00361011	0.0259842	1	3149	tags=40%, list=23%, signal=52%
GOBP_BRANCHING_INVOLVED_IN_SALIVARY_GLAND_MORPHOGENESIS	GOBP_BRANCHING_INVOLVED_IN_SALIVARY_GLAND_MORPHOGENESIS		26	-0.552902	-1.59671	0.026	0.0260542	1	3980	tags=54%, list=29%, signal=76%
GOBP_VESICLE_TRANSPORT_ALONG_MICROTUBULE	GOBP_VESICLE_TRANSPORT_ALONG_MICROTUBULE		43	-0.501931	-1.59655	0.00592885	0.0260641	1	3671	tags=58%, list=27%, signal=79%
GOBP_ANATOMICAL_STRUCTURE_HOMEOSTASIS	GOBP_ANATOMICAL_STRUCTURE_HOMEOSTASIS		257	-0.381626	-1.59463	0	0.0264999	1	3155	tags=30%, list=23%, signal=38%
GOMF_DNA_BINDING_TRANSCRIPTION_ACTIVATOR_ACTIVITY	GOMF_DNA_BINDING_TRANSCRIPTION_ACTIVATOR_ACTIVITY		349	-0.370138	-1.59467	0	0.0265113	1	3699	tags=32%, list=27%, signal=43%
GOBP_REGULATION_OF_PLATELET_ACTIVATION	GOBP_REGULATION_OF_PLATELET_ACTIVATION		38	-0.516926	-1.59445	0.011236	0.0265175	1	4260	tags=55%, list=31%, signal=80%
GOBP_NEGATIVE_REGULATION_OF_STEM_CELL_PROLIFERATION	GOBP_NEGATIVE_REGULATION_OF_STEM_CELL_PROLIFERATION		23	-0.58001	-1.59389	0.00996016	0.026616	1	2153	tags=30%, list=16%, signal=36%
GOBP_PHOSPHOLIPID_DEPHOSPHORYLATION	GOBP_PHOSPHOLIPID_DEPHOSPHORYLATION		29	-0.547985	-1.59397	0.0144404	0.0266176	1	4181	tags=48%, list=31%, signal=70%
GOBP_SKELETAL_MUSCLE_CELL_PROLIFERATION	GOBP_SKELETAL_MUSCLE_CELL_PROLIFERATION		15	-0.635313	-1.59298	0.0238095	0.0267995	1	3444	tags=60%, list=25%, signal=80%
GOMF_NITRIC_OXIDE_SYNTHASE_BINDING	GOMF_NITRIC_OXIDE_SYNTHASE_BINDING		21	-0.573102	-1.59271	0.00759013	0.0268092	1	1295	tags=29%, list=10%, signal=32%
GOBP_EPITHELIAL_TO_MESENCHYMAL_TRANSITION_INVOLVED_IN_ENDOCARDIAL_CUSHION_FORMATION	GOBP_EPITHELIAL_TO_MESENCHYMAL_TRANSITION_INVOLVED_IN_ENDOCARDIAL_CUSHION_FORMATION		17	-0.618154	-1.59282	0.0160321	0.0268098	1	3812	tags=53%, list=28%, signal=74%
GOBP_VESICLE_DOCKING_INVOLVED_IN_EXOCYTOSIS	GOBP_VESICLE_DOCKING_INVOLVED_IN_EXOCYTOSIS		45	-0.496281	-1.59298	0.0114943	0.0268209	1	2417	tags=38%, list=18%, signal=46%
GOCC_NEURON_PROJECTION_CYTOPLASM	GOCC_NEURON_PROJECTION_CYTOPLASM		40	-0.50445	-1.59223	0.00373832	0.0268947	1	2396	tags=35%, list=18%, signal=42%
GOBP_CARDIAC_EPITHELIAL_TO_MESENCHYMAL_TRANSITION	GOBP_CARDIAC_EPITHELIAL_TO_MESENCHYMAL_TRANSITION		29	-0.54473	-1.59213	0.00952381	0.0268998	1	3954	tags=41%, list=29%, signal=58%
GOBP_PROTEIN_KINASE_C_ACTIVATING_G_PROTEIN_COUPLED_RECEPTOR_SIGNALING_PATHWAY	GOBP_PROTEIN_KINASE_C_ACTIVATING_G_PROTEIN_COUPLED_RECEPTOR_SIGNALING_PATHWAY		20	-0.580537	-1.59181	0.0165441	0.0269682	1	1897	tags=40%, list=14%, signal=46%
GOBP_POSITIVE_REGULATION_OF_HYDROLASE_ACTIVITY	GOBP_POSITIVE_REGULATION_OF_HYDROLASE_ACTIVITY		461	-0.360908	-1.59119	0	0.0270702	1	3532	tags=39%, list=26%, signal=51%
GOBP_EPITHELIAL_CELL_DIFFERENTIATION_INVOLVED_IN_KIDNEY_DEVELOPMENT	GOBP_EPITHELIAL_CELL_DIFFERENTIATION_INVOLVED_IN_KIDNEY_DEVELOPMENT		34	-0.515838	-1.59121	0.0153551	0.0270899	1	4623	tags=65%, list=34%, signal=98%
GOBP_CELLULAR_RESPONSE_TO_INSULIN_STIMULUS	GOBP_CELLULAR_RESPONSE_TO_INSULIN_STIMULUS		172	-0.39635	-1.58977	0.0017762	0.027413	1	3788	tags=42%, list=28%, signal=57%
GOBP_REGULATION_OF_PEPTIDYL_SERINE_PHOSPHORYLATION	GOBP_REGULATION_OF_PEPTIDYL_SERINE_PHOSPHORYLATION		115	-0.420206	-1.58967	0	0.0274258	1	2848	tags=32%, list=21%, signal=40%
GOBP_NEUROTRANSMITTER_UPTAKE	GOBP_NEUROTRANSMITTER_UPTAKE		26	-0.549527	-1.58955	0.0261682	0.0274505	1	2417	tags=42%, list=18%, signal=51%
GOBP_TELENCEPHALON_GLIAL_CELL_MIGRATION	GOBP_TELENCEPHALON_GLIAL_CELL_MIGRATION		22	-0.581027	-1.58933	0.0173077	0.0274766	1	2977	tags=59%, list=22%, signal=76%
GOBP_FACE_DEVELOPMENT	GOBP_FACE_DEVELOPMENT		51	-0.474967	-1.58933	0.00197628	0.0274984	1	3995	tags=57%, list=29%, signal=80%
GOBP_POSITIVE_REGULATION_OF_NEURON_MIGRATION	GOBP_POSITIVE_REGULATION_OF_NEURON_MIGRATION		20	-0.577412	-1.58808	0.0225141	0.0277686	1	3213	tags=55%, list=24%, signal=72%
GOBP_ENDOCRINE_PROCESS	GOBP_ENDOCRINE_PROCESS		74	-0.455999	-1.58792	0.00560748	0.0277828	1	3402	tags=36%, list=25%, signal=48%
GOBP_OVULATION_CYCLE	GOBP_OVULATION_CYCLE		42	-0.487198	-1.58764	0.021978	0.0278294	1	2923	tags=26%, list=22%, signal=33%
GOBP_DIGESTIVE_TRACT_MORPHOGENESIS	GOBP_DIGESTIVE_TRACT_MORPHOGENESIS		43	-0.493656	-1.58743	0.0110497	0.0278691	1	5425	tags=65%, list=40%, signal=108%
GOBP_REGULATION_OF_JNK_CASCADE	GOBP_REGULATION_OF_JNK_CASCADE		128	-0.409056	-1.58725	0	0.0278912	1	2848	tags=33%, list=21%, signal=41%
GOMF_PHOSPHATIDYLINOSITOL_PHOSPHATE_BINDING	GOMF_PHOSPHATIDYLINOSITOL_PHOSPHATE_BINDING		152	-0.399883	-1.58626	0	0.0281049	1	2103	tags=22%, list=15%, signal=25%
GOBP_VENTRICULAR_CARDIAC_MUSCLE_CELL_MEMBRANE_REPOLARIZATION	GOBP_VENTRICULAR_CARDIAC_MUSCLE_CELL_MEMBRANE_REPOLARIZATION		19	-0.600095	-1.58575	0.0166667	0.028192	1	1720	tags=37%, list=13%, signal=42%
GOCC_PHAGOPHORE_ASSEMBLY_SITE	GOCC_PHAGOPHORE_ASSEMBLY_SITE		30	-0.529663	-1.58557	0.0215686	0.0282087	1	2890	tags=37%, list=21%, signal=46%
GOBP_NEGATIVE_REGULATION_OF_VOLTAGE_GATED_CALCIUM_CHANNEL_ACTIVITY	GOBP_NEGATIVE_REGULATION_OF_VOLTAGE_GATED_CALCIUM_CHANNEL_ACTIVITY		15	-0.634068	-1.58575	0.0174757	0.0282133	1	2396	tags=53%, list=18%, signal=65%
GOBP_CELL_DIFFERENTIATION_IN_SPINAL_CORD	GOBP_CELL_DIFFERENTIATION_IN_SPINAL_CORD		28	-0.541279	-1.58487	0.00729927	0.028356	1	2524	tags=36%, list=19%, signal=44%
GOBP_REGULATION_OF_CHEMOTAXIS	GOBP_REGULATION_OF_CHEMOTAXIS		177	-0.389484	-1.58451	0	0.0284253	1	2868	tags=28%, list=21%, signal=35%
GOBP_AMYLOID_PRECURSOR_PROTEIN_METABOLIC_PROCESS	GOBP_AMYLOID_PRECURSOR_PROTEIN_METABOLIC_PROCESS		66	-0.456265	-1.58379	0.00559702	0.0286053	1	3532	tags=44%, list=26%, signal=59%
GOBP_BLASTODERM_SEGMENTATION	GOBP_BLASTODERM_SEGMENTATION		18	-0.600724	-1.58327	0.0262172	0.0287227	1	4716	tags=72%, list=35%, signal=111%
GOBP_POSITIVE_REGULATION_OF_SYNAPTIC_VESICLE_RECYCLING	GOBP_POSITIVE_REGULATION_OF_SYNAPTIC_VESICLE_RECYCLING		15	-0.632054	-1.58267	0.0355731	0.0288244	1	1368	tags=33%, list=10%, signal=37%
GOBP_RESPONSE_TO_OXYGEN_LEVELS	GOBP_RESPONSE_TO_OXYGEN_LEVELS		204	-0.385009	-1.58277	0	0.0288275	1	2979	tags=29%, list=22%, signal=37%
GOBP_MAINTENANCE_OF_LOCATION	GOBP_MAINTENANCE_OF_LOCATION		257	-0.377198	-1.58209	0	0.0289329	1	2947	tags=30%, list=22%, signal=37%
GOMF_L_ASCORBIC_ACID_BINDING	GOMF_L_ASCORBIC_ACID_BINDING		16	-0.618638	-1.58165	0.0206767	0.0290391	1	3132	tags=56%, list=23%, signal=73%
GOCC_9PLUS0_NON_MOTILE_CILIUM	GOCC_9PLUS0_NON_MOTILE_CILIUM		80	-0.44118	-1.58112	0.00357143	0.0291136	1	2575	tags=31%, list=19%, signal=38%
GOBP_REGULATION_OF_ESTABLISHMENT_OF_CELL_POLARITY	GOBP_REGULATION_OF_ESTABLISHMENT_OF_CELL_POLARITY		18	-0.597212	-1.58119	0.0191939	0.0291238	1	2142	tags=44%, list=16%, signal=53%
GOBP_POSITIVE_REGULATION_OF_MACROAUTOPHAGY	GOBP_POSITIVE_REGULATION_OF_MACROAUTOPHAGY		67	-0.454081	-1.58098	0.00747664	0.0291275	1	3522	tags=42%, list=26%, signal=56%
GOBP_INNER_EAR_RECEPTOR_CELL_STEREOCILIUM_ORGANIZATION	GOBP_INNER_EAR_RECEPTOR_CELL_STEREOCILIUM_ORGANIZATION		32	-0.516743	-1.58036	0.0130112	0.0292862	1	3694	tags=50%, list=27%, signal=69%
GOBP_NEGATIVE_REGULATION_OF_NEURON_PROJECTION_REGENERATION	GOBP_NEGATIVE_REGULATION_OF_NEURON_PROJECTION_REGENERATION		16	-0.619512	-1.57984	0.0225564	0.0293048	1	2688	tags=50%, list=20%, signal=62%
GOBP_NEUROEPITHELIAL_CELL_DIFFERENTIATION	GOBP_NEUROEPITHELIAL_CELL_DIFFERENTIATION		28	-0.533715	-1.58016	0.0248092	0.0293096	1	2651	tags=39%, list=20%, signal=49%
GOCC_SIDE_OF_MEMBRANE	GOCC_SIDE_OF_MEMBRANE		442	-0.357991	-1.58001	0	0.0293176	1	1855	tags=18%, list=14%, signal=21%
GOBP_GASTRULATION_WITH_MOUTH_FORMING_SECOND	GOBP_GASTRULATION_WITH_MOUTH_FORMING_SECOND		23	-0.56846	-1.57965	0.018797	0.0293204	1	1535	tags=26%, list=11%, signal=29%
GOBP_AUTOPHAGY_OF_NUCLEUS	GOBP_AUTOPHAGY_OF_NUCLEUS		15	-0.61844	-1.57985	0.0219124	0.0293238	1	1467	tags=33%, list=11%, signal=37%
GOBP_REGULATION_OF_SYSTEMIC_ARTERIAL_BLOOD_PRESSURE	GOBP_REGULATION_OF_SYSTEMIC_ARTERIAL_BLOOD_PRESSURE		75	-0.446347	-1.57895	0.00723327	0.0294299	1	3149	tags=40%, list=23%, signal=52%
GOBP_POSITIVE_REGULATION_OF_SMOOTH_MUSCLE_CELL_PROLIFERATION	GOBP_POSITIVE_REGULATION_OF_SMOOTH_MUSCLE_CELL_PROLIFERATION		99	-0.429181	-1.57909	0	0.029442	1	3003	tags=36%, list=22%, signal=46%
GOBP_REGULATION_OF_BLOOD_VESSEL_ENDOTHELIAL_CELL_MIGRATION	GOBP_REGULATION_OF_BLOOD_VESSEL_ENDOTHELIAL_CELL_MIGRATION		87	-0.437207	-1.57897	0.0018315	0.029447	1	4045	tags=46%, list=30%, signal=65%
MP_ABNORMAL_TUMOR_VASCULARIZATION	MP_ABNORMAL_TUMOR_VASCULARIZATION		25	-0.551712	-1.57826	0.0147874	0.0295837	1	2823	tags=32%, list=21%, signal=40%
GOBP_REGULATION_OF_MUSCLE_CELL_DIFFERENTIATION	GOBP_REGULATION_OF_MUSCLE_CELL_DIFFERENTIATION		126	-0.410102	-1.57635	0.00377358	0.0300695	1	3721	tags=47%, list=27%, signal=64%
GOBP_EMBRYONIC_HEART_TUBE_MORPHOGENESIS	GOBP_EMBRYONIC_HEART_TUBE_MORPHOGENESIS		50	-0.477185	-1.57548	0.00957854	0.0302263	1	3430	tags=48%, list=25%, signal=64%
GOBP_VENTRICULAR_CARDIAC_MUSCLE_TISSUE_MORPHOGENESIS	GOBP_VENTRICULAR_CARDIAC_MUSCLE_TISSUE_MORPHOGENESIS		39	-0.496958	-1.57565	0.00808081	0.0302329	1	2312	tags=33%, list=17%, signal=40%
GOMF_G_PROTEIN_COUPLED_RECEPTOR_BINDING	GOMF_G_PROTEIN_COUPLED_RECEPTOR_BINDING		197	-0.386346	-1.57549	0	0.0302496	1	2635	tags=29%, list=19%, signal=36%
GOBP_MAINTENANCE_OF_LOCATION_IN_CELL	GOBP_MAINTENANCE_OF_LOCATION_IN_CELL		167	-0.393756	-1.57461	0	0.0303982	1	3612	tags=40%, list=27%, signal=54%
GOBP_REGULATION_OF_CILIUM_ASSEMBLY	GOBP_REGULATION_OF_CILIUM_ASSEMBLY		54	-0.469927	-1.57462	0.0111524	0.0304179	1	2615	tags=30%, list=19%, signal=37%
GOBP_NON_MOTILE_CILIUM_ASSEMBLY	GOBP_NON_MOTILE_CILIUM_ASSEMBLY		58	-0.462756	-1.57436	0.00719425	0.0304388	1	3636	tags=47%, list=27%, signal=63%
GOBP_POSITIVE_REGULATION_OF_KINASE_ACTIVITY	GOBP_POSITIVE_REGULATION_OF_KINASE_ACTIVITY		360	-0.365433	-1.574	0	0.0305191	1	3060	tags=30%, list=23%, signal=37%
GOBP_RESPONSE_TO_FIBROBLAST_GROWTH_FACTOR	GOBP_RESPONSE_TO_FIBROBLAST_GROWTH_FACTOR		79	-0.443903	-1.57367	0.00180505	0.0305852	1	2711	tags=28%, list=20%, signal=35%
GOBP_NEUROTRANSMITTER_REUPTAKE	GOBP_NEUROTRANSMITTER_REUPTAKE		20	-0.570694	-1.57294	0.0191571	0.0307522	1	2417	tags=45%, list=18%, signal=55%
GOBP_REGULATION_OF_LIPID_KINASE_ACTIVITY	GOBP_REGULATION_OF_LIPID_KINASE_ACTIVITY		42	-0.496975	-1.57268	0.0137525	0.0307772	1	2912	tags=38%, list=21%, signal=48%
GOBP_NEGATIVE_REGULATION_OF_BLOOD_PRESSURE	GOBP_NEGATIVE_REGULATION_OF_BLOOD_PRESSURE		41	-0.496663	-1.57271	0.0114723	0.0307961	1	3183	tags=51%, list=23%, signal=67%
GOBP_RESPONSE_TO_ALCOHOL	GOBP_RESPONSE_TO_ALCOHOL		117	-0.410719	-1.57234	0.00184162	0.0308523	1	3301	tags=36%, list=24%, signal=47%
GOBP_SODIUM_ION_HOMEOSTASIS	GOBP_SODIUM_ION_HOMEOSTASIS		38	-0.50118	-1.57221	0.0126354	0.0308684	1	3991	tags=53%, list=29%, signal=74%
GOBP_REGULATION_OF_MICROTUBULE_BASED_MOVEMENT	GOBP_REGULATION_OF_MICROTUBULE_BASED_MOVEMENT		24	-0.558597	-1.57184	0.0132827	0.0309528	1	2400	tags=46%, list=18%, signal=56%
GOBP_REGULATION_OF_SYNAPTIC_VESICLE_ENDOCYTOSIS	GOBP_REGULATION_OF_SYNAPTIC_VESICLE_ENDOCYTOSIS		20	-0.582236	-1.57086	0.0176125	0.0311852	1	1434	tags=25%, list=11%, signal=28%
GOBP_SMAD_PROTEIN_SIGNAL_TRANSDUCTION	GOBP_SMAD_PROTEIN_SIGNAL_TRANSDUCTION		70	-0.441785	-1.56931	0.00368324	0.0315655	1	3517	tags=37%, list=26%, signal=50%
GOBP_GLYCEROPHOSPHOLIPID_CATABOLIC_PROCESS	GOBP_GLYCEROPHOSPHOLIPID_CATABOLIC_PROCESS		24	-0.562498	-1.56844	0.022541	0.0318	1	2798	tags=25%, list=21%, signal=31%
GOBP_SKELETAL_MUSCLE_CELL_DIFFERENTIATION	GOBP_SKELETAL_MUSCLE_CELL_DIFFERENTIATION		58	-0.467801	-1.56823	0.00934579	0.0318448	1	2959	tags=36%, list=22%, signal=46%
GOBP_MEMBRANE_DOCKING	GOBP_MEMBRANE_DOCKING		81	-0.436922	-1.56766	0.00371058	0.0319369	1	3084	tags=33%, list=23%, signal=43%
GOBP_POSITIVE_REGULATION_OF_CYTOSKELETON_ORGANIZATION	GOBP_POSITIVE_REGULATION_OF_CYTOSKELETON_ORGANIZATION		172	-0.391669	-1.56783	0.00185874	0.0319413	1	3555	tags=38%, list=26%, signal=51%
GOBP_POSITIVE_REGULATION_OF_EPITHELIAL_CELL_MIGRATION	GOBP_POSITIVE_REGULATION_OF_EPITHELIAL_CELL_MIGRATION		143	-0.398028	-1.56775	0	0.0319451	1	3129	tags=31%, list=23%, signal=40%
GOBP_PROTEIN_POLYMERIZATION	GOBP_PROTEIN_POLYMERIZATION		223	-0.378555	-1.56668	0	0.032195	1	2265	tags=27%, list=17%, signal=32%
GOBP_MICROVILLUS_ASSEMBLY	GOBP_MICROVILLUS_ASSEMBLY		19	-0.573125	-1.56642	0.0292969	0.0322458	1	3063	tags=32%, list=23%, signal=41%
GOBP_MUSCLE_CELL_MIGRATION	GOBP_MUSCLE_CELL_MIGRATION		112	-0.412521	-1.56579	0.00181159	0.0324115	1	2988	tags=32%, list=22%, signal=41%
GOBP_NEGATIVE_REGULATION_OF_EPITHELIAL_TO_MESENCHYMAL_TRANSITION	GOBP_NEGATIVE_REGULATION_OF_EPITHELIAL_TO_MESENCHYMAL_TRANSITION		33	-0.505108	-1.56522	0.0191939	0.0325487	1	2615	tags=30%, list=19%, signal=37%
GOBP_PROTEIN_AUTOPHOSPHORYLATION	GOBP_PROTEIN_AUTOPHOSPHORYLATION		212	-0.380858	-1.56434	0	0.0327434	1	3070	tags=32%, list=23%, signal=40%
GOBP_CRANIAL_SKELETAL_SYSTEM_DEVELOPMENT	GOBP_CRANIAL_SKELETAL_SYSTEM_DEVELOPMENT		59	-0.455065	-1.56437	0.00556586	0.032758	1	3766	tags=47%, list=28%, signal=65%
GOBP_POSITIVE_REGULATION_OF_PEPTIDE_SECRETION	GOBP_POSITIVE_REGULATION_OF_PEPTIDE_SECRETION		89	-0.428552	-1.56335	0	0.0329961	1	3084	tags=37%, list=23%, signal=48%
GOBP_MYELOID_DENDRITIC_CELL_DIFFERENTIATION	GOBP_MYELOID_DENDRITIC_CELL_DIFFERENTIATION		18	-0.59313	-1.56183	0.0175781	0.0334161	1	1725	tags=28%, list=13%, signal=32%
GOBP_PHENOL_CONTAINING_COMPOUND_METABOLIC_PROCESS	GOBP_PHENOL_CONTAINING_COMPOUND_METABOLIC_PROCESS		81	-0.434129	-1.56135	0.00555556	0.0335351	1	2977	tags=33%, list=22%, signal=42%
GOBP_REGULATION_OF_PROTEIN_CONTAINING_COMPLEX_ASSEMBLY	GOBP_REGULATION_OF_PROTEIN_CONTAINING_COMPLEX_ASSEMBLY		356	-0.360974	-1.56108	0	0.0335891	1	2713	tags=31%, list=20%, signal=37%
GOBP_EPITHELIAL_CELL_APOPTOTIC_PROCESS	GOBP_EPITHELIAL_CELL_APOPTOTIC_PROCESS		125	-0.411112	-1.56019	0	0.0338084	1	3449	tags=42%, list=25%, signal=55%
GOBP_POSITIVE_REGULATION_OF_LYASE_ACTIVITY	GOBP_POSITIVE_REGULATION_OF_LYASE_ACTIVITY		28	-0.527006	-1.56022	0.0163043	0.0338264	1	1617	tags=32%, list=12%, signal=36%
GOBP_GLUCOSE_IMPORT	GOBP_GLUCOSE_IMPORT		63	-0.452488	-1.55942	0.0122807	0.0339832	1	3643	tags=38%, list=27%, signal=52%
GOBP_RESPONSE_TO_INORGANIC_SUBSTANCE	GOBP_RESPONSE_TO_INORGANIC_SUBSTANCE		384	-0.358901	-1.55914	0	0.0340358	1	2520	tags=27%, list=19%, signal=33%
GOBP_COLUMNAR_CUBOIDAL_EPITHELIAL_CELL_DEVELOPMENT	GOBP_COLUMNAR_CUBOIDAL_EPITHELIAL_CELL_DEVELOPMENT		46	-0.481222	-1.55868	0.0167286	0.0341224	1	3281	tags=35%, list=24%, signal=46%
GOBP_DIENCEPHALON_DEVELOPMENT	GOBP_DIENCEPHALON_DEVELOPMENT		41	-0.487939	-1.55855	0.0187617	0.0341248	1	2577	tags=37%, list=19%, signal=45%
GOMF_PHOSPHATIDYLINOSITOL_BISPHOSPHATE_PHOSPHATASE_ACTIVITY	GOMF_PHOSPHATIDYLINOSITOL_BISPHOSPHATE_PHOSPHATASE_ACTIVITY		20	-0.57304	-1.55873	0.0275591	0.034136	1	1951	tags=30%, list=14%, signal=35%
GOBP_ENERGY_RESERVE_METABOLIC_PROCESS	GOBP_ENERGY_RESERVE_METABOLIC_PROCESS		69	-0.441254	-1.55791	0.0118812	0.0342933	1	3791	tags=45%, list=28%, signal=62%
GOBP_NUCLEUS_LOCALIZATION	GOBP_NUCLEUS_LOCALIZATION		37	-0.504528	-1.55745	0.0133588	0.0344005	1	3919	tags=73%, list=29%, signal=102%
GOMF_GROWTH_FACTOR_BINDING	GOMF_GROWTH_FACTOR_BINDING		123	-0.40784	-1.55706	0	0.0344678	1	2897	tags=34%, list=21%, signal=43%
GOBP_NEGATIVE_REGULATION_OF_HORMONE_SECRETION	GOBP_NEGATIVE_REGULATION_OF_HORMONE_SECRETION		68	-0.450833	-1.55712	0.0092081	0.0344797	1	3060	tags=40%, list=23%, signal=51%
GOBP_POSITIVE_REGULATION_OF_VOLTAGE_GATED_CALCIUM_CHANNEL_ACTIVITY	GOBP_POSITIVE_REGULATION_OF_VOLTAGE_GATED_CALCIUM_CHANNEL_ACTIVITY		16	-0.609397	-1.55686	0.037182	0.0344939	1	1704	tags=38%, list=13%, signal=43%
GOBP_REGULATION_OF_NITRIC_OXIDE_SYNTHASE_ACTIVITY	GOBP_REGULATION_OF_NITRIC_OXIDE_SYNTHASE_ACTIVITY		30	-0.528307	-1.55602	0.0266667	0.0346961	1	2604	tags=30%, list=19%, signal=37%
GOMF_MOLECULAR_ADAPTOR_ACTIVITY	GOMF_MOLECULAR_ADAPTOR_ACTIVITY		306	-0.362658	-1.5559	0	0.0346997	1	2825	tags=30%, list=21%, signal=37%
GOBP_ENDOTHELIAL_CELL_APOPTOTIC_PROCESS	GOBP_ENDOTHELIAL_CELL_APOPTOTIC_PROCESS		46	-0.472005	-1.55567	0.0114723	0.0347422	1	2877	tags=46%, list=21%, signal=58%
GOMF_INSULIN_LIKE_GROWTH_FACTOR_BINDING	GOMF_INSULIN_LIKE_GROWTH_FACTOR_BINDING		18	-0.586028	-1.55554	0.0300188	0.0347552	1	5114	tags=83%, list=38%, signal=134%
GOBP_GROOMING_BEHAVIOR	GOBP_GROOMING_BEHAVIOR		15	-0.622985	-1.55513	0.0363289	0.0348616	1	1795	tags=47%, list=13%, signal=54%
GOBP_REGULATION_OF_POLYSACCHARIDE_BIOSYNTHETIC_PROCESS	GOBP_REGULATION_OF_POLYSACCHARIDE_BIOSYNTHETIC_PROCESS		34	-0.507419	-1.55453	0.0166052	0.0350145	1	3980	tags=50%, list=29%, signal=71%
GOBP_LAMELLIPODIUM_ASSEMBLY	GOBP_LAMELLIPODIUM_ASSEMBLY		64	-0.451555	-1.55432	0.00376648	0.0350556	1	3737	tags=47%, list=28%, signal=64%
GOBP_ACTIVIN_RECEPTOR_SIGNALING_PATHWAY	GOBP_ACTIVIN_RECEPTOR_SIGNALING_PATHWAY		29	-0.525767	-1.55334	0.0304762	0.0353339	1	3724	tags=41%, list=27%, signal=57%
GOBP_COCHLEA_DEVELOPMENT	GOBP_COCHLEA_DEVELOPMENT		38	-0.500465	-1.55312	0.0142602	0.0353712	1	3065	tags=39%, list=23%, signal=51%
GOBP_NEGATIVE_REGULATION_OF_SMOOTH_MUSCLE_CONTRACTION	GOBP_NEGATIVE_REGULATION_OF_SMOOTH_MUSCLE_CONTRACTION		17	-0.59567	-1.55252	0.0297619	0.0355282	1	2659	tags=47%, list=20%, signal=58%
GOBP_REGULATION_OF_MAP_KINASE_ACTIVITY	GOBP_REGULATION_OF_MAP_KINASE_ACTIVITY		179	-0.389428	-1.55232	0.00170648	0.0355444	1	3070	tags=29%, list=23%, signal=37%
GOBP_RECEPTOR_METABOLIC_PROCESS	GOBP_RECEPTOR_METABOLIC_PROCESS		65	-0.441512	-1.55235	0.00761905	0.0355617	1	2004	tags=25%, list=15%, signal=29%
GOBP_POSITIVE_REGULATION_OF_CELL_MATRIX_ADHESION	GOBP_POSITIVE_REGULATION_OF_CELL_MATRIX_ADHESION		52	-0.469708	-1.55131	0.00767754	0.0358351	1	3552	tags=38%, list=26%, signal=52%
GOBP_REGULATION_OF_SKELETAL_MUSCLE_CELL_DIFFERENTIATION	GOBP_REGULATION_OF_SKELETAL_MUSCLE_CELL_DIFFERENTIATION		19	-0.577662	-1.55077	0.0184162	0.0359713	1	4365	tags=79%, list=32%, signal=116%
GOBP_CELL_DIFFERENTIATION_INVOLVED_IN_KIDNEY_DEVELOPMENT	GOBP_CELL_DIFFERENTIATION_INVOLVED_IN_KIDNEY_DEVELOPMENT		44	-0.484109	-1.55039	0.0130597	0.0360619	1	4097	tags=52%, list=30%, signal=75%
GOBP_POLYSACCHARIDE_BIOSYNTHETIC_PROCESS	GOBP_POLYSACCHARIDE_BIOSYNTHETIC_PROCESS		62	-0.448215	-1.54995	0.0095057	0.0361498	1	3980	tags=40%, list=29%, signal=57%
GOMF_SECONDARY_ACTIVE_TRANSMEMBRANE_TRANSPORTER_ACTIVITY	GOMF_SECONDARY_ACTIVE_TRANSMEMBRANE_TRANSPORTER_ACTIVITY		152	-0.396479	-1.54981	0	0.0361538	1	2453	tags=23%, list=18%, signal=28%
GOBP_RESPONSE_TO_ATP	GOBP_RESPONSE_TO_ATP		23	-0.544081	-1.54981	0.0263653	0.0361797	1	2856	tags=39%, list=21%, signal=49%
GOBP_MOTILE_CILIUM_ASSEMBLY	GOBP_MOTILE_CILIUM_ASSEMBLY		27	-0.528727	-1.54932	0.0240296	0.0362784	1	4016	tags=52%, list=30%, signal=74%
GOBP_NEGATIVE_REGULATION_OF_NEURON_DEATH	GOBP_NEGATIVE_REGULATION_OF_NEURON_DEATH		214	-0.375587	-1.54895	0	0.0363371	1	3017	tags=34%, list=22%, signal=43%
GOBP_GROWTH_PLATE_CARTILAGE_DEVELOPMENT	GOBP_GROWTH_PLATE_CARTILAGE_DEVELOPMENT		18	-0.582512	-1.54883	0.0241449	0.0363424	1	2711	tags=56%, list=20%, signal=69%
GOBP_POSITIVE_REGULATION_OF_JNK_CASCADE	GOBP_POSITIVE_REGULATION_OF_JNK_CASCADE		83	-0.423389	-1.54904	0.00180505	0.036343	1	2848	tags=33%, list=21%, signal=41%
GOBP_POSITIVE_REGULATION_OF_MUSCLE_CELL_DIFFERENTIATION	GOBP_POSITIVE_REGULATION_OF_MUSCLE_CELL_DIFFERENTIATION		59	-0.450322	-1.5487	0.0171756	0.0363509	1	3711	tags=49%, list=27%, signal=67%
GOMF_FRIZZLED_BINDING	GOMF_FRIZZLED_BINDING		27	-0.528062	-1.54826	0.0155945	0.0364665	1	4679	tags=70%, list=34%, signal=107%
GOBP_POSITIVE_REGULATION_OF_GLUCOSE_IMPORT	GOBP_POSITIVE_REGULATION_OF_GLUCOSE_IMPORT		32	-0.514737	-1.54816	0.0167286	0.0364679	1	1529	tags=25%, list=11%, signal=28%
GOBP_REGULATION_OF_PEPTIDYL_TYROSINE_PHOSPHORYLATION	GOBP_REGULATION_OF_PEPTIDYL_TYROSINE_PHOSPHORYLATION		212	-0.379877	-1.54701	0	0.0367415	1	4026	tags=38%, list=30%, signal=53%
GOBP_SYMPATHETIC_NERVOUS_SYSTEM_DEVELOPMENT	GOBP_SYMPATHETIC_NERVOUS_SYSTEM_DEVELOPMENT		19	-0.578284	-1.54703	0.0198807	0.036763	1	2331	tags=37%, list=17%, signal=44%
GOBP_REGULATION_OF_FEEDING_BEHAVIOR	GOBP_REGULATION_OF_FEEDING_BEHAVIOR		21	-0.569761	-1.54685	0.0206379	0.0367663	1	2104	tags=38%, list=16%, signal=45%
GOBP_NEGATIVE_REGULATION_OF_GROWTH	GOBP_NEGATIVE_REGULATION_OF_GROWTH		219	-0.376478	-1.54708	0	0.0367673	1	2923	tags=29%, list=22%, signal=37%
GOBP_ROOF_OF_MOUTH_DEVELOPMENT	GOBP_ROOF_OF_MOUTH_DEVELOPMENT		80	-0.430344	-1.54711	0.00186916	0.0367861	1	3517	tags=39%, list=26%, signal=52%
GOBP_REGULATION_OF_EPITHELIAL_CELL_APOPTOTIC_PROCESS	GOBP_REGULATION_OF_EPITHELIAL_CELL_APOPTOTIC_PROCESS		97	-0.420771	-1.54668	0.00740741	0.0367939	1	3449	tags=43%, list=25%, signal=58%
GOBP_STRIATED_MUSCLE_ADAPTATION	GOBP_STRIATED_MUSCLE_ADAPTATION		28	-0.530724	-1.54625	0.0183824	0.0368595	1	2702	tags=43%, list=20%, signal=53%
GOBP_CHONDROITIN_SULFATE_METABOLIC_PROCESS	GOBP_CHONDROITIN_SULFATE_METABOLIC_PROCESS		28	-0.529296	-1.54633	0.028463	0.0368657	1	3851	tags=46%, list=28%, signal=65%
GOBP_CELL_CELL_JUNCTION_ASSEMBLY	GOBP_CELL_CELL_JUNCTION_ASSEMBLY		113	-0.412124	-1.54613	0.00714286	0.0368669	1	1971	tags=20%, list=15%, signal=24%
GOBP_CHONDROITIN_SULFATE_PROTEOGLYCAN_METABOLIC_PROCESS	GOBP_CHONDROITIN_SULFATE_PROTEOGLYCAN_METABOLIC_PROCESS		32	-0.503172	-1.54639	0.0213592	0.0368728	1	2351	tags=31%, list=17%, signal=38%
GOBP_INOSITOL_PHOSPHATE_MEDIATED_SIGNALING	GOBP_INOSITOL_PHOSPHATE_MEDIATED_SIGNALING		41	-0.484897	-1.54541	0.00948767	0.0370533	1	3092	tags=41%, list=23%, signal=54%
GOBP_REGULATION_OF_CELL_MIGRATION_INVOLVED_IN_SPROUTING_ANGIOGENESIS	GOBP_REGULATION_OF_CELL_MIGRATION_INVOLVED_IN_SPROUTING_ANGIOGENESIS		36	-0.503395	-1.54546	0.0141593	0.0370676	1	3974	tags=56%, list=29%, signal=78%
GOBP_HYALURONAN_BIOSYNTHETIC_PROCESS	GOBP_HYALURONAN_BIOSYNTHETIC_PROCESS		15	-0.604114	-1.54519	0.0357143	0.0371048	1	3980	tags=47%, list=29%, signal=66%
GOMF_GTPASE_BINDING	GOMF_GTPASE_BINDING		293	-0.363509	-1.54429	0	0.0373553	1	3307	tags=34%, list=24%, signal=44%
GOBP_TISSUE_REMODELING	GOBP_TISSUE_REMODELING		160	-0.389472	-1.54397	0.00177305	0.0374245	1	4196	tags=42%, list=31%, signal=60%
GOBP_REGULATION_OF_MESENCHYMAL_CELL_PROLIFERATION	GOBP_REGULATION_OF_MESENCHYMAL_CELL_PROLIFERATION		37	-0.49273	-1.54372	0.0167598	0.0374547	1	3068	tags=46%, list=23%, signal=59%
GOBP_PLATELET_AGGREGATION	GOBP_PLATELET_AGGREGATION		40	-0.498908	-1.54377	0.0195312	0.0374684	1	4260	tags=55%, list=31%, signal=80%
GOBP_REGULATION_OF_TISSUE_REMODELING	GOBP_REGULATION_OF_TISSUE_REMODELING		67	-0.445482	-1.54251	0.0114286	0.0378006	1	2897	tags=30%, list=21%, signal=38%
GOCC_CYTOPLASMIC_SIDE_OF_MEMBRANE	GOCC_CYTOPLASMIC_SIDE_OF_MEMBRANE		165	-0.387404	-1.54231	0	0.0378244	1	2620	tags=29%, list=19%, signal=36%
GOCC_PIGMENT_GRANULE	GOCC_PIGMENT_GRANULE		26	-0.533379	-1.54252	0.0135659	0.0378263	1	1795	tags=19%, list=13%, signal=22%
GOCC_DENDRITE_TERMINUS	GOCC_DENDRITE_TERMINUS		17	-0.588076	-1.54128	0.034296	0.0381304	1	1868	tags=41%, list=14%, signal=48%
GOBP_CELLULAR_RESPONSE_TO_HYPOXIA	GOBP_CELLULAR_RESPONSE_TO_HYPOXIA		95	-0.419371	-1.54102	0.00732601	0.0381951	1	3613	tags=35%, list=27%, signal=47%
GOBP_NEGATIVE_REGULATION_OF_CALCIUM_ION_TRANSMEMBRANE_TRANSPORTER_ACTIVITY	GOBP_NEGATIVE_REGULATION_OF_CALCIUM_ION_TRANSMEMBRANE_TRANSPORTER_ACTIVITY		30	-0.523877	-1.54051	0.0205339	0.0383178	1	2396	tags=40%, list=18%, signal=48%
GOCC_CLATHRIN_COATED_PIT	GOCC_CLATHRIN_COATED_PIT		64	-0.447588	-1.54035	0.00713012	0.0383463	1	2950	tags=38%, list=22%, signal=48%
GOBP_POSITIVE_REGULATION_OF_STRIATED_MUSCLE_CELL_APOPTOTIC_PROCESS	GOBP_POSITIVE_REGULATION_OF_STRIATED_MUSCLE_CELL_APOPTOTIC_PROCESS		19	-0.56491	-1.54003	0.0350195	0.0384108	1	2568	tags=42%, list=19%, signal=52%
GOBP_POLYSACCHARIDE_METABOLIC_PROCESS	GOBP_POLYSACCHARIDE_METABOLIC_PROCESS		95	-0.421949	-1.53727	0.00374532	0.039288	1	3791	tags=39%, list=28%, signal=54%
GOBP_NEGATIVE_REGULATION_OF_PROTEIN_SECRETION	GOBP_NEGATIVE_REGULATION_OF_PROTEIN_SECRETION		63	-0.447898	-1.53698	0.00568182	0.0393287	1	2562	tags=35%, list=19%, signal=43%
GOBP_SPECIFICATION_OF_SYMMETRY	GOBP_SPECIFICATION_OF_SYMMETRY		96	-0.414242	-1.53707	0.00186567	0.039332	1	3517	tags=40%, list=26%, signal=53%
GOBP_POSITIVE_REGULATION_OF_MEIOTIC_CELL_CYCLE	GOBP_POSITIVE_REGULATION_OF_MEIOTIC_CELL_CYCLE		19	-0.576175	-1.53652	0.0297952	0.0394189	1	461	tags=21%, list=3%, signal=22%
GOBP_CELL_SURFACE_RECEPTOR_SIGNALING_PATHWAY_INVOLVED_IN_HEART_DEVELOPMENT	GOBP_CELL_SURFACE_RECEPTOR_SIGNALING_PATHWAY_INVOLVED_IN_HEART_DEVELOPMENT		23	-0.55023	-1.53658	0.0337302	0.0394321	1	2577	tags=30%, list=19%, signal=38%
GOMF_RECEPTOR_TYROSINE_KINASE_BINDING	GOMF_RECEPTOR_TYROSINE_KINASE_BINDING		67	-0.437729	-1.53532	0.00919118	0.0398214	1	2572	tags=36%, list=19%, signal=44%
GOMF_ALCOHOL_BINDING	GOMF_ALCOHOL_BINDING		69	-0.438352	-1.53468	0.00363636	0.0400002	1	2034	tags=23%, list=15%, signal=27%
GOBP_REGULATION_OF_CALCIUM_ION_IMPORT	GOBP_REGULATION_OF_CALCIUM_ION_IMPORT		28	-0.515238	-1.53433	0.0320151	0.0400878	1	1439	tags=18%, list=11%, signal=20%
GOCC_CLATHRIN_COATED_ENDOCYTIC_VESICLE	GOCC_CLATHRIN_COATED_ENDOCYTIC_VESICLE		21	-0.575394	-1.53284	0.0340265	0.0405778	1	840	tags=29%, list=6%, signal=30%
GOBP_REGULATION_OF_AMYLOID_BETA_FORMATION	GOBP_REGULATION_OF_AMYLOID_BETA_FORMATION		31	-0.51142	-1.53171	0.0263653	0.0409135	1	3388	tags=45%, list=25%, signal=60%
GOMF_PHOSPHATIDYLSERINE_BINDING	GOMF_PHOSPHATIDYLSERINE_BINDING		45	-0.477128	-1.53179	0.0211946	0.0409162	1	3334	tags=44%, list=25%, signal=59%
GOBP_NEGATIVE_REGULATION_OF_TRANSFORMING_GROWTH_FACTOR_BETA_RECEPTOR_SIGNALING_PATHWAY	GOBP_NEGATIVE_REGULATION_OF_TRANSFORMING_GROWTH_FACTOR_BETA_RECEPTOR_SIGNALING_PATHWAY		80	-0.418649	-1.53111	0.0135135	0.0410996	1	3233	tags=39%, list=24%, signal=51%
GOBP_ODONTOGENESIS_OF_DENTIN_CONTAINING_TOOTH	GOBP_ODONTOGENESIS_OF_DENTIN_CONTAINING_TOOTH		61	-0.450966	-1.53053	0.00739372	0.0412678	1	3825	tags=44%, list=28%, signal=61%
GOBP_SECRETION_BY_TISSUE	GOBP_SECRETION_BY_TISSUE		43	-0.480919	-1.53032	0.0245747	0.0413213	1	2052	tags=30%, list=15%, signal=36%
GOBP_REGULATION_OF_RECEPTOR_LOCALIZATION_TO_SYNAPSE	GOBP_REGULATION_OF_RECEPTOR_LOCALIZATION_TO_SYNAPSE		22	-0.543622	-1.52937	0.0373832	0.0415592	1	3163	tags=59%, list=23%, signal=77%
GOBP_EPIDERMIS_MORPHOGENESIS	GOBP_EPIDERMIS_MORPHOGENESIS		30	-0.516319	-1.52962	0.0163636	0.0415642	1	2313	tags=30%, list=17%, signal=36%
GOBP_SHORT_TERM_MEMORY	GOBP_SHORT_TERM_MEMORY		15	-0.603377	-1.52953	0.0359848	0.0415645	1	3648	tags=73%, list=27%, signal=100%
GOBP_MULTICELLULAR_ORGANISMAL_HOMEOSTASIS	GOBP_MULTICELLULAR_ORGANISMAL_HOMEOSTASIS		426	-0.348874	-1.52926	0	0.0415667	1	3155	tags=28%, list=23%, signal=36%
GOBP_REGULATION_OF_GLUCOSE_IMPORT	GOBP_REGULATION_OF_GLUCOSE_IMPORT		51	-0.465526	-1.52943	0.0127505	0.0415712	1	3643	tags=39%, list=27%, signal=53%
GOBP_MESODERM_MORPHOGENESIS	GOBP_MESODERM_MORPHOGENESIS		50	-0.463461	-1.52906	0.0130841	0.041613	1	3737	tags=52%, list=28%, signal=72%
GOBP_REGULATION_OF_HAIR_CYCLE	GOBP_REGULATION_OF_HAIR_CYCLE		26	-0.535712	-1.52844	0.0361446	0.0417914	1	4172	tags=50%, list=31%, signal=72%
GOCC_PHOTORECEPTOR_INNER_SEGMENT	GOCC_PHOTORECEPTOR_INNER_SEGMENT		33	-0.499883	-1.5282	0.0250965	0.0418541	1	3811	tags=52%, list=28%, signal=71%
GOBP_DETECTION_OF_TEMPERATURE_STIMULUS	GOBP_DETECTION_OF_TEMPERATURE_STIMULUS		16	-0.596734	-1.52806	0.0415879	0.0418754	1	2052	tags=38%, list=15%, signal=44%
GOMF_STRUCTURAL_CONSTITUENT_OF_CYTOSKELETON	GOMF_STRUCTURAL_CONSTITUENT_OF_CYTOSKELETON		54	-0.451833	-1.52731	0.0163934	0.0421083	1	1305	tags=28%, list=10%, signal=31%
GOBP_REGULATION_OF_HEAT_GENERATION	GOBP_REGULATION_OF_HEAT_GENERATION		15	-0.606204	-1.52719	0.0421687	0.0421162	1	2442	tags=33%, list=18%, signal=41%
GOMF_PHOSPHATIDYLINOSITOL_3_KINASE_REGULATOR_ACTIVITY	GOMF_PHOSPHATIDYLINOSITOL_3_KINASE_REGULATOR_ACTIVITY		18	-0.575257	-1.52638	0.0505051	0.0423479	1	2857	tags=50%, list=21%, signal=63%
GOBP_CELL_GROWTH	GOBP_CELL_GROWTH		441	-0.345484	-1.52646	0	0.0423551	1	3277	tags=36%, list=24%, signal=45%
GOBP_VENTRAL_SPINAL_CORD_DEVELOPMENT	GOBP_VENTRAL_SPINAL_CORD_DEVELOPMENT		32	-0.510236	-1.5262	0.0158103	0.0423785	1	3746	tags=47%, list=28%, signal=65%
GOBP_POSITIVE_REGULATION_OF_PROTEIN_SECRETION	GOBP_POSITIVE_REGULATION_OF_PROTEIN_SECRETION		127	-0.400013	-1.52608	0.00179211	0.0423887	1	3685	tags=36%, list=27%, signal=49%
GOBP_CELL_FATE_DETERMINATION	GOBP_CELL_FATE_DETERMINATION		24	-0.544361	-1.52539	0.0313653	0.0426012	1	2702	tags=42%, list=20%, signal=52%
GOMF_SULFOTRANSFERASE_ACTIVITY	GOMF_SULFOTRANSFERASE_ACTIVITY		36	-0.488154	-1.52519	0.0316574	0.0426514	1	4527	tags=42%, list=33%, signal=62%
GOBP_RESPONSE_TO_ETHANOL	GOBP_RESPONSE_TO_ETHANOL		42	-0.477007	-1.52418	0.0223464	0.0429799	1	2988	tags=50%, list=22%, signal=64%
GOMF_PROTEIN_MACROMOLECULE_ADAPTOR_ACTIVITY	GOMF_PROTEIN_MACROMOLECULE_ADAPTOR_ACTIVITY		257	-0.361404	-1.52234	0	0.0435973	1	2825	tags=29%, list=21%, signal=36%
GOBP_POSITIVE_REGULATION_OF_PROTEIN_TYROSINE_KINASE_ACTIVITY	GOBP_POSITIVE_REGULATION_OF_PROTEIN_TYROSINE_KINASE_ACTIVITY		40	-0.476525	-1.52168	0.0232558	0.0437968	1	2989	tags=30%, list=22%, signal=38%
GOBP_EMBRYONIC_CAMERA_TYPE_EYE_DEVELOPMENT	GOBP_EMBRYONIC_CAMERA_TYPE_EYE_DEVELOPMENT		34	-0.492554	-1.52158	0.0280899	0.0438025	1	3903	tags=50%, list=29%, signal=70%
GOBP_REGULATION_OF_ACTIN_FILAMENT_LENGTH	GOBP_REGULATION_OF_ACTIN_FILAMENT_LENGTH		134	-0.390641	-1.52122	0.00934579	0.0438911	1	2251	tags=27%, list=17%, signal=32%
GOCC_EXTRINSIC_COMPONENT_OF_CYTOPLASMIC_SIDE_OF_PLASMA_MEMBRANE	GOCC_EXTRINSIC_COMPONENT_OF_CYTOPLASMIC_SIDE_OF_PLASMA_MEMBRANE		87	-0.414038	-1.52108	0.00375235	0.0439064	1	2383	tags=31%, list=18%, signal=37%
GOBP_REGULATION_OF_NEUROINFLAMMATORY_RESPONSE	GOBP_REGULATION_OF_NEUROINFLAMMATORY_RESPONSE		20	-0.558683	-1.52086	0.045977	0.0439572	1	1529	tags=30%, list=11%, signal=34%
GOCC_CILIARY_MEMBRANE	GOCC_CILIARY_MEMBRANE		42	-0.477719	-1.52058	0.0148423	0.0440341	1	2598	tags=31%, list=19%, signal=38%
GOBP_HEMATOPOIETIC_STEM_CELL_HOMEOSTASIS	GOBP_HEMATOPOIETIC_STEM_CELL_HOMEOSTASIS		26	-0.526762	-1.5204	0.0306748	0.0440708	1	2479	tags=35%, list=18%, signal=42%
GOBP_SPINAL_CORD_MOTOR_NEURON_DIFFERENTIATION	GOBP_SPINAL_CORD_MOTOR_NEURON_DIFFERENTIATION		23	-0.544736	-1.51954	0.0413386	0.0443568	1	1651	tags=30%, list=12%, signal=35%
GOBP_POSITIVE_REGULATION_OF_PROTEIN_KINASE_ACTIVITY	GOBP_POSITIVE_REGULATION_OF_PROTEIN_KINASE_ACTIVITY		302	-0.354464	-1.51944	0	0.0443585	1	3060	tags=31%, list=23%, signal=39%
GOBP_RETINAL_GANGLION_CELL_AXON_GUIDANCE	GOBP_RETINAL_GANGLION_CELL_AXON_GUIDANCE		16	-0.590429	-1.51896	0.0428016	0.0445171	1	1492	tags=38%, list=11%, signal=42%
GOBP_NEGATIVE_REGULATION_OF_TRANSPORTER_ACTIVITY	GOBP_NEGATIVE_REGULATION_OF_TRANSPORTER_ACTIVITY		70	-0.435745	-1.51701	0.0165746	0.0452638	1	3201	tags=41%, list=24%, signal=54%
GOBP_POSTSYNAPTIC_MODULATION_OF_CHEMICAL_SYNAPTIC_TRANSMISSION	GOBP_POSTSYNAPTIC_MODULATION_OF_CHEMICAL_SYNAPTIC_TRANSMISSION		16	-0.595718	-1.51679	0.0425926	0.0453185	1	3092	tags=50%, list=23%, signal=65%
GOBP_EPITHELIAL_CELL_CELL_ADHESION	GOBP_EPITHELIAL_CELL_CELL_ADHESION		15	-0.598003	-1.51608	0.0478012	0.0455482	1	1299	tags=27%, list=10%, signal=29%
GOBP_NEURON_DEATH	GOBP_NEURON_DEATH		366	-0.351178	-1.5153	0	0.0457963	1	3017	tags=32%, list=22%, signal=40%
GOBP_MOLTING_CYCLE	GOBP_MOLTING_CYCLE		105	-0.40521	-1.51494	0.00555556	0.0458937	1	4233	tags=42%, list=31%, signal=60%
GOBP_AMYLOID_BETA_FORMATION	GOBP_AMYLOID_BETA_FORMATION		41	-0.479899	-1.51455	0.0108303	0.0459928	1	3498	tags=44%, list=26%, signal=59%
GOBP_CELL_CELL_JUNCTION_MAINTENANCE	GOBP_CELL_CELL_JUNCTION_MAINTENANCE		15	-0.595836	-1.51367	0.0510397	0.0462687	1	3504	tags=40%, list=26%, signal=54%
GOBP_POSITIVE_REGULATION_OF_CILIUM_ASSEMBLY	GOBP_POSITIVE_REGULATION_OF_CILIUM_ASSEMBLY		21	-0.551314	-1.51357	0.025974	0.046277	1	3606	tags=52%, list=27%, signal=71%
GOMF_SCAVENGER_RECEPTOR_ACTIVITY	GOMF_SCAVENGER_RECEPTOR_ACTIVITY		26	-0.524367	-1.51319	0.026975	0.046389	1	3354	tags=46%, list=25%, signal=61%
GOBP_T_CELL_LINEAGE_COMMITMENT	GOBP_T_CELL_LINEAGE_COMMITMENT		20	-0.553985	-1.51225	0.0628684	0.0466132	1	3842	tags=50%, list=28%, signal=70%
GOBP_OLIGODENDROCYTE_DIFFERENTIATION	GOBP_OLIGODENDROCYTE_DIFFERENTIATION		86	-0.422603	-1.51229	0.00580271	0.0466267	1	2836	tags=40%, list=21%, signal=50%
GOBP_NEURON_APOPTOTIC_PROCESS	GOBP_NEURON_APOPTOTIC_PROCESS		274	-0.35912	-1.51234	0	0.0466283	1	3017	tags=34%, list=22%, signal=42%
GOBP_STRESS_ACTIVATED_PROTEIN_KINASE_SIGNALING_CASCADE	GOBP_STRESS_ACTIVATED_PROTEIN_KINASE_SIGNALING_CASCADE		216	-0.367586	-1.51202	0.00182149	0.046653	1	3492	tags=37%, list=26%, signal=48%
GOBP_CELLULAR_RESPONSE_TO_LIPOPROTEIN_PARTICLE_STIMULUS	GOBP_CELLULAR_RESPONSE_TO_LIPOPROTEIN_PARTICLE_STIMULUS		32	-0.50605	-1.51237	0.0320755	0.0466547	1	4223	tags=44%, list=31%, signal=63%
GOBP_PROTEIN_KINASE_B_SIGNALING	GOBP_PROTEIN_KINASE_B_SIGNALING		163	-0.377826	-1.51052	0	0.0471937	1	3871	tags=39%, list=29%, signal=53%
GOMF_PHOSPHORIC_ESTER_HYDROLASE_ACTIVITY	GOMF_PHOSPHORIC_ESTER_HYDROLASE_ACTIVITY		279	-0.357057	-1.5103	0	0.0472699	1	2683	tags=26%, list=20%, signal=32%
GOMF_AMINO_ACID_TRANSMEMBRANE_TRANSPORTER_ACTIVITY	GOMF_AMINO_ACID_TRANSMEMBRANE_TRANSPORTER_ACTIVITY		53	-0.452483	-1.50912	0.0056391	0.0476849	1	1795	tags=19%, list=13%, signal=22%
GOCC_ACTIN_FILAMENT	GOCC_ACTIN_FILAMENT		116	-0.397233	-1.50853	0.003663	0.0478868	1	3171	tags=36%, list=23%, signal=47%
GOBP_POSITIVE_REGULATION_OF_CIRCADIAN_RHYTHM	GOBP_POSITIVE_REGULATION_OF_CIRCADIAN_RHYTHM		16	-0.59645	-1.50804	0.0486381	0.0480411	1	2104	tags=38%, list=16%, signal=44%
GOBP_CELL_CELL_ADHESION_MEDIATED_BY_CADHERIN	GOBP_CELL_CELL_ADHESION_MEDIATED_BY_CADHERIN		21	-0.54839	-1.50777	0.037594	0.0480747	1	3378	tags=43%, list=25%, signal=57%
GOBP_STEM_CELL_DEVELOPMENT	GOBP_STEM_CELL_DEVELOPMENT		80	-0.412494	-1.50778	0.00766283	0.0481045	1	4011	tags=49%, list=30%, signal=69%
GOCC_FILOPODIUM_TIP	GOCC_FILOPODIUM_TIP		16	-0.579356	-1.50706	0.0444874	0.048287	1	98	tags=19%, list=1%, signal=19%
GOBP_CELL_PROLIFERATION_INVOLVED_IN_KIDNEY_DEVELOPMENT	GOBP_CELL_PROLIFERATION_INVOLVED_IN_KIDNEY_DEVELOPMENT		17	-0.590709	-1.50655	0.0535373	0.0484659	1	2577	tags=41%, list=19%, signal=51%
GOBP_CARDIAC_MUSCLE_ADAPTATION	GOBP_CARDIAC_MUSCLE_ADAPTATION		17	-0.583005	-1.50642	0.0326923	0.0484837	1	1200	tags=35%, list=9%, signal=39%
GOBP_REGULATION_OF_LIPID_TRANSPORT	GOBP_REGULATION_OF_LIPID_TRANSPORT		113	-0.395061	-1.50633	0.00561798	0.0484851	1	3000	tags=28%, list=22%, signal=36%
GOBP_POSITIVE_REGULATION_OF_BMP_SIGNALING_PATHWAY	GOBP_POSITIVE_REGULATION_OF_BMP_SIGNALING_PATHWAY		29	-0.518629	-1.50568	0.00967118	0.0487047	1	4274	tags=66%, list=31%, signal=95%
GOMF_PHOSPHATIDYLINOSITOL_3_KINASE_BINDING	GOMF_PHOSPHATIDYLINOSITOL_3_KINASE_BINDING		35	-0.493521	-1.50467	0.023622	0.0490651	1	3495	tags=49%, list=26%, signal=65%
GOBP_POSITIVE_REGULATION_OF_PATHWAY_RESTRICTED_SMAD_PROTEIN_PHOSPHORYLATION	GOBP_POSITIVE_REGULATION_OF_PATHWAY_RESTRICTED_SMAD_PROTEIN_PHOSPHORYLATION		36	-0.482163	-1.5045	0.0268199	0.0490725	1	4155	tags=39%, list=31%, signal=56%
GOBP_MORPHOGENESIS_OF_AN_EPITHELIAL_FOLD	GOBP_MORPHOGENESIS_OF_AN_EPITHELIAL_FOLD		21	-0.549229	-1.50471	0.0425139	0.04908	1	2604	tags=33%, list=19%, signal=41%
GOBP_NEGATIVE_REGULATION_OF_ACTIN_FILAMENT_POLYMERIZATION	GOBP_NEGATIVE_REGULATION_OF_ACTIN_FILAMENT_POLYMERIZATION		54	-0.442158	-1.50452	0.0178891	0.0490994	1	2686	tags=37%, list=20%, signal=46%
GOBP_TRANSFORMING_GROWTH_FACTOR_BETA_PRODUCTION	GOBP_TRANSFORMING_GROWTH_FACTOR_BETA_PRODUCTION		32	-0.493903	-1.50422	0.0277778	0.0491593	1	2033	tags=31%, list=15%, signal=37%
GOBP_REGULATION_OF_OSTEOCLAST_DIFFERENTIATION	GOBP_REGULATION_OF_OSTEOCLAST_DIFFERENTIATION		57	-0.443048	-1.50373	0.0094518	0.0493217	1	2676	tags=33%, list=20%, signal=41%
GOCC_CYTOPLASMIC_MICROTUBULE	GOCC_CYTOPLASMIC_MICROTUBULE		59	-0.441124	-1.50329	0.0152672	0.0494605	1	2855	tags=44%, list=21%, signal=56%
GOBP_GLIAL_CELL_DEVELOPMENT	GOBP_GLIAL_CELL_DEVELOPMENT		96	-0.408489	-1.50301	0.00364299	0.0495288	1	1819	tags=23%, list=13%, signal=26%
GOBP_ESTABLISHMENT_OF_CELL_POLARITY	GOBP_ESTABLISHMENT_OF_CELL_POLARITY		132	-0.390334	-1.50248	0.00189753	0.0497015	1	2877	tags=36%, list=21%, signal=45%
GOBP_VENTRICULAR_TRABECULA_MYOCARDIUM_MORPHOGENESIS	GOBP_VENTRICULAR_TRABECULA_MYOCARDIUM_MORPHOGENESIS		15	-0.592895	-1.50223	0.0482375	0.0497689	1	5141	tags=80%, list=38%, signal=129%
GOBP_POSITIVE_REGULATION_OF_PROTEIN_CONTAINING_COMPLEX_DISASSEMBLY	GOBP_POSITIVE_REGULATION_OF_PROTEIN_CONTAINING_COMPLEX_DISASSEMBLY		28	-0.507196	-1.50189	0.024952	0.0498633	1	2125	tags=32%, list=16%, signal=38%
GOBP_NEGATIVE_REGULATION_OF_ORGANIC_ACID_TRANSPORT	GOBP_NEGATIVE_REGULATION_OF_ORGANIC_ACID_TRANSPORT		22	-0.545421	-1.50147	0.0421245	0.0499836	1	3647	tags=45%, list=27%, signal=62%

## Sheet: corrPD_R_VS_NR_M5 pos
NAME	GS.br..follow.link.to.MSigDB	GS.DETAILS	SIZE	ES	NES	NOM.p.val	FDR.q.val	FWER.p.val	RANK.AT.MAX	LEADING.EDGE
GOMF_STRUCTURAL_CONSTITUENT_OF_RIBOSOME	GOMF_STRUCTURAL_CONSTITUENT_OF_RIBOSOME	Details ...	148	0.8739	3.52645	0	0	0	1348	tags=89%, list=10%, signal=97%
GOCC_RIBOSOMAL_SUBUNIT	GOCC_RIBOSOMAL_SUBUNIT	Details ...	173	0.855396	3.48355	0	0	0	1376	tags=84%, list=10%, signal=92%
GOCC_RIBOSOME	GOCC_RIBOSOME	Details ...	200	0.827169	3.46352	0	0	0	1376	tags=76%, list=10%, signal=83%
GOCC_CYTOSOLIC_RIBOSOME	GOCC_CYTOSOLIC_RIBOSOME	Details ...	92	0.908246	3.38897	0	0	0	578	tags=83%, list=4%, signal=86%
GOBP_RIBOSOME_BIOGENESIS	GOBP_RIBOSOME_BIOGENESIS	Details ...	267	0.768837	3.29639	0	0	0	1788	tags=63%, list=13%, signal=71%
GOBP_CYTOPLASMIC_TRANSLATION	GOBP_CYTOPLASMIC_TRANSLATION	Details ...	133	0.833414	3.28523	0	0	0	578	tags=59%, list=4%, signal=61%
GOCC_LARGE_RIBOSOMAL_SUBUNIT	GOCC_LARGE_RIBOSOMAL_SUBUNIT	Details ...	104	0.85032	3.27586	0	0	0	1376	tags=85%, list=10%, signal=93%
GOCC_MITOCHONDRIAL_PROTEIN_CONTAINING_COMPLEX	GOCC_MITOCHONDRIAL_PROTEIN_CONTAINING_COMPLEX	Details ...	247	0.767672	3.27011	0	0	0	2004	tags=71%, list=15%, signal=82%
GOBP_RRNA_METABOLIC_PROCESS	GOBP_RRNA_METABOLIC_PROCESS	Details ...	225	0.754699	3.2006	0	0	0	2241	tags=65%, list=17%, signal=77%
GOBP_MITOCHONDRIAL_TRANSLATION	GOBP_MITOCHONDRIAL_TRANSLATION	Details ...	123	0.815214	3.18884	0	0	0	2046	tags=85%, list=15%, signal=100%
GOBP_RRNA_PROCESSING	GOBP_RRNA_PROCESSING	Details ...	195	0.769749	3.16292	0	0	0	1788	tags=65%, list=13%, signal=74%
GOBP_MITOCHONDRIAL_GENE_EXPRESSION	GOBP_MITOCHONDRIAL_GENE_EXPRESSION	Details ...	149	0.786295	3.15507	0	0	0	2046	tags=78%, list=15%, signal=91%
GOBP_RIBONUCLEOPROTEIN_COMPLEX_BIOGENESIS	GOBP_RIBONUCLEOPROTEIN_COMPLEX_BIOGENESIS	Details ...	377	0.710587	3.12853	0	0	0	1788	tags=56%, list=13%, signal=63%
GOCC_CYTOSOLIC_LARGE_RIBOSOMAL_SUBUNIT	GOCC_CYTOSOLIC_LARGE_RIBOSOMAL_SUBUNIT	Details ...	49	0.921938	3.12202	0	0	0	497	tags=90%, list=4%, signal=93%
GOCC_SMALL_RIBOSOMAL_SUBUNIT	GOCC_SMALL_RIBOSOMAL_SUBUNIT	Details ...	74	0.853413	3.06678	0	0	0	1167	tags=80%, list=9%, signal=87%
GOCC_ORGANELLAR_RIBOSOME	GOCC_ORGANELLAR_RIBOSOME	Details ...	87	0.8309	3.06008	0	0	0	2004	tags=91%, list=15%, signal=106%
GOCC_MITOCHONDRIAL_MATRIX	GOCC_MITOCHONDRIAL_MATRIX	Details ...	259	0.711285	3.04463	0	0	0	2217	tags=57%, list=16%, signal=67%
GOBP_NCRNA_PROCESSING	GOBP_NCRNA_PROCESSING	Details ...	353	0.690282	3.02563	0	0	0	2453	tags=58%, list=18%, signal=68%
GOMF_RRNA_BINDING	GOMF_RRNA_BINDING	Details ...	67	0.833917	2.99677	0	0	0	1249	tags=72%, list=9%, signal=79%
GOCC_CYTOSOLIC_SMALL_RIBOSOMAL_SUBUNIT	GOCC_CYTOSOLIC_SMALL_RIBOSOMAL_SUBUNIT	Details ...	42	0.906646	2.91858	0	0	0	578	tags=81%, list=4%, signal=84%
GOBP_RIBOSOMAL_LARGE_SUBUNIT_BIOGENESIS	GOBP_RIBOSOMAL_LARGE_SUBUNIT_BIOGENESIS		62	0.842113	2.91695	0	0	0	1574	tags=79%, list=12%, signal=89%
GOCC_INNER_MITOCHONDRIAL_MEMBRANE_PROTEIN_COMPLEX	GOCC_INNER_MITOCHONDRIAL_MEMBRANE_PROTEIN_COMPLEX		109	0.760286	2.876	0	0	0	2048	tags=72%, list=15%, signal=84%
GOCC_MITOCHONDRIAL_LARGE_RIBOSOMAL_SUBUNIT	GOCC_MITOCHONDRIAL_LARGE_RIBOSOMAL_SUBUNIT		55	0.830521	2.86629	0	0	0	2004	tags=91%, list=15%, signal=106%
GOCC_POLYSOME	GOCC_POLYSOME		68	0.791992	2.84418	0	0	0	614	tags=50%, list=5%, signal=52%
GOCC_ORGANELLE_INNER_MEMBRANE	GOCC_ORGANELLE_INNER_MEMBRANE		476	0.626235	2.83786	0	0	0	2113	tags=48%, list=16%, signal=55%
GOCC_PRERIBOSOME	GOCC_PRERIBOSOME		71	0.785747	2.82464	0	0	0	1862	tags=75%, list=14%, signal=86%
GOBP_TRNA_METABOLIC_PROCESS	GOBP_TRNA_METABOLIC_PROCESS		157	0.688833	2.81695	0	0	0	2453	tags=58%, list=18%, signal=70%
GOBP_RIBOSOME_ASSEMBLY	GOBP_RIBOSOME_ASSEMBLY		53	0.812552	2.77289	0	0	0	1788	tags=79%, list=13%, signal=91%
GOBP_OXIDATIVE_PHOSPHORYLATION	GOBP_OXIDATIVE_PHOSPHORYLATION		107	0.717977	2.76273	0	0	0	2092	tags=68%, list=15%, signal=80%
GOBP_RIBOSOMAL_SMALL_SUBUNIT_BIOGENESIS	GOBP_RIBOSOMAL_SMALL_SUBUNIT_BIOGENESIS		68	0.77357	2.76043	0	0	0	2062	tags=74%, list=15%, signal=86%
GOCC_RESPIRASOME	GOCC_RESPIRASOME		70	0.769519	2.75811	0	0	0	2048	tags=74%, list=15%, signal=87%
GOBP_AEROBIC_RESPIRATION	GOBP_AEROBIC_RESPIRATION		146	0.67335	2.70608	0	0	0	2787	tags=66%, list=21%, signal=83%
GOCC_POLYSOMAL_RIBOSOME	GOCC_POLYSOMAL_RIBOSOME		33	0.869892	2.70237	0	0	0	1060	tags=79%, list=8%, signal=85%
GOMF_CATALYTIC_ACTIVITY_ACTING_ON_RNA	GOMF_CATALYTIC_ACTIVITY_ACTING_ON_RNA		303	0.618	2.68985	0	0	0	2460	tags=48%, list=18%, signal=57%
GOMF_CATALYTIC_ACTIVITY_ACTING_ON_A_TRNA	GOMF_CATALYTIC_ACTIVITY_ACTING_ON_A_TRNA		110	0.694339	2.6687	0	0	0	2453	tags=61%, list=18%, signal=74%
GOBP_MITOCHONDRIAL_RESPIRATORY_CHAIN_COMPLEX_ASSEMBLY	GOBP_MITOCHONDRIAL_RESPIRATORY_CHAIN_COMPLEX_ASSEMBLY		73	0.740543	2.66783	0	0	0	2086	tags=71%, list=15%, signal=84%
GOCC_OXIDOREDUCTASE_COMPLEX	GOCC_OXIDOREDUCTASE_COMPLEX		100	0.683493	2.62219	0	0	0	2933	tags=65%, list=22%, signal=82%
GOBP_RIBONUCLEOPROTEIN_COMPLEX_SUBUNIT_ORGANIZATION	GOBP_RIBONUCLEOPROTEIN_COMPLEX_SUBUNIT_ORGANIZATION		164	0.641374	2.62056	0	0	0	1788	tags=50%, list=13%, signal=57%
GOBP_ATP_SYNTHESIS_COUPLED_ELECTRON_TRANSPORT	GOBP_ATP_SYNTHESIS_COUPLED_ELECTRON_TRANSPORT		54	0.760962	2.6111	0	0	0	2092	tags=76%, list=15%, signal=89%
GOBP_PROTON_MOTIVE_FORCE_DRIVEN_ATP_SYNTHESIS	GOBP_PROTON_MOTIVE_FORCE_DRIVEN_ATP_SYNTHESIS		54	0.763703	2.57961	0	0	0	2048	tags=80%, list=15%, signal=93%
GOBP_MATURATION_OF_SSU_RRNA	GOBP_MATURATION_OF_SSU_RRNA		47	0.771726	2.57887	0	0	0	2205	tags=74%, list=16%, signal=89%
GOCC_MITOCHONDRIAL_SMALL_RIBOSOMAL_SUBUNIT	GOCC_MITOCHONDRIAL_SMALL_RIBOSOMAL_SUBUNIT		32	0.834079	2.57255	0	0	0	2105	tags=94%, list=16%, signal=111%
GOBP_RIBOSOMAL_LARGE_SUBUNIT_ASSEMBLY	GOBP_RIBOSOMAL_LARGE_SUBUNIT_ASSEMBLY		22	0.894271	2.56007	0	0	0	1401	tags=91%, list=10%, signal=101%
GOCC_CATALYTIC_STEP_2_SPLICEOSOME	GOCC_CATALYTIC_STEP_2_SPLICEOSOME		84	0.694494	2.53698	0	0	0	2063	tags=52%, list=15%, signal=61%
GOBP_TRNA_PROCESSING	GOBP_TRNA_PROCESSING		109	0.661258	2.53508	0	0	0	2453	tags=54%, list=18%, signal=66%
GOBP_CELLULAR_RESPIRATION	GOBP_CELLULAR_RESPIRATION		189	0.612924	2.53409	0	0	0	2787	tags=60%, list=21%, signal=75%
GOBP_AEROBIC_ELECTRON_TRANSPORT_CHAIN	GOBP_AEROBIC_ELECTRON_TRANSPORT_CHAIN		44	0.772196	2.52721	0	0	0	2092	tags=80%, list=15%, signal=94%
GOCC_NADH_DEHYDROGENASE_COMPLEX	GOCC_NADH_DEHYDROGENASE_COMPLEX		37	0.80025	2.52202	0	0	0	2048	tags=86%, list=15%, signal=102%
GOMF_CATALYTIC_ACTIVITY_ACTING_ON_A_NUCLEIC_ACID	GOMF_CATALYTIC_ACTIVITY_ACTING_ON_A_NUCLEIC_ACID		480	0.549859	2.50166	0	0	0	3158	tags=49%, list=23%, signal=62%
GOCC_SPLICEOSOMAL_COMPLEX	GOCC_SPLICEOSOMAL_COMPLEX		180	0.599905	2.49768	0	0	0	3490	tags=57%, list=26%, signal=76%
GOCC_U2_TYPE_SPLICEOSOMAL_COMPLEX	GOCC_U2_TYPE_SPLICEOSOMAL_COMPLEX		87	0.672942	2.49708	0	0	0	3246	tags=67%, list=24%, signal=87%
GOBP_RNA_MODIFICATION	GOBP_RNA_MODIFICATION		131	0.628554	2.49537	0	0	0	1843	tags=42%, list=14%, signal=48%
GOMF_OXIDOREDUCTION_DRIVEN_ACTIVE_TRANSMEMBRANE_TRANSPORTER_ACTIVITY	GOMF_OXIDOREDUCTION_DRIVEN_ACTIVE_TRANSMEMBRANE_TRANSPORTER_ACTIVITY		34	0.806374	2.49186	0	0	0	1734	tags=76%, list=13%, signal=87%
GOBP_NADH_DEHYDROGENASE_COMPLEX_ASSEMBLY	GOBP_NADH_DEHYDROGENASE_COMPLEX_ASSEMBLY		46	0.762292	2.48553	0	0	0	2787	tags=87%, list=21%, signal=109%
GOMF_TRNA_BINDING	GOMF_TRNA_BINDING		63	0.704006	2.45722	0	0	0	3017	tags=63%, list=22%, signal=81%
GOBP_ELECTRON_TRANSPORT_CHAIN	GOBP_ELECTRON_TRANSPORT_CHAIN		79	0.679314	2.45571	0	0	0	2990	tags=72%, list=22%, signal=92%
GOMF_ENDONUCLEASE_ACTIVITY_ACTIVE_WITH_EITHER_RIBO_OR_DEOXYRIBONUCLEIC_ACIDS_AND_PRODUCING_5_PHOSPHOMONOESTERS	GOMF_ENDONUCLEASE_ACTIVITY_ACTIVE_WITH_EITHER_RIBO_OR_DEOXYRIBONUCLEIC_ACIDS_AND_PRODUCING_5_PHOSPHOMONOESTERS		33	0.792318	2.45258	0	0	0	1853	tags=61%, list=14%, signal=70%
GOBP_MATURATION_OF_SSU_RRNA_FROM_TRICISTRONIC_RRNA_TRANSCRIPT_SSU_RRNA_5_8S_RRNA_LSU_RRNA	GOBP_MATURATION_OF_SSU_RRNA_FROM_TRICISTRONIC_RRNA_TRANSCRIPT_SSU_RRNA_5_8S_RRNA_LSU_RRNA		34	0.784228	2.4503	0	0	0	2060	tags=76%, list=15%, signal=90%
GOMF_ELECTRON_TRANSFER_ACTIVITY	GOMF_ELECTRON_TRANSFER_ACTIVITY		49	0.73716	2.44714	0	0	0	2856	tags=78%, list=21%, signal=98%
GOBP_RNA_TEMPLATED_DNA_BIOSYNTHETIC_PROCESS	GOBP_RNA_TEMPLATED_DNA_BIOSYNTHETIC_PROCESS		58	0.701181	2.44671	0	0	0	2120	tags=55%, list=16%, signal=65%
GOCC_SM_LIKE_PROTEIN_FAMILY_COMPLEX	GOCC_SM_LIKE_PROTEIN_FAMILY_COMPLEX		72	0.674547	2.43306	0	0	0	2781	tags=63%, list=20%, signal=78%
GOBP_MATURATION_OF_LSU_RRNA	GOBP_MATURATION_OF_LSU_RRNA		27	0.82318	2.43034	0	0	0	1992	tags=85%, list=15%, signal=100%
GOCC_PRECATALYTIC_SPLICEOSOME	GOCC_PRECATALYTIC_SPLICEOSOME		51	0.712558	2.42372	0	0	0	2934	tags=73%, list=22%, signal=92%
GOBP_REGULATION_OF_MITOCHONDRIAL_GENE_EXPRESSION	GOBP_REGULATION_OF_MITOCHONDRIAL_GENE_EXPRESSION		26	0.813872	2.39288	0	0	0	1252	tags=62%, list=9%, signal=68%
GOBP_SPLICEOSOMAL_SNRNP_ASSEMBLY	GOBP_SPLICEOSOMAL_SNRNP_ASSEMBLY		32	0.769635	2.39028	0	0	0	1677	tags=66%, list=12%, signal=75%
GOCC_90S_PRERIBOSOME	GOCC_90S_PRERIBOSOME		27	0.809378	2.3898	0	0	0	1413	tags=74%, list=10%, signal=83%
GOBP_NUCLEIC_ACID_PHOSPHODIESTER_BOND_HYDROLYSIS	GOBP_NUCLEIC_ACID_PHOSPHODIESTER_BOND_HYDROLYSIS		83	0.645837	2.38521	0	0	0	2455	tags=55%, list=18%, signal=67%
GOMF_RIBONUCLEOPROTEIN_COMPLEX_BINDING	GOMF_RIBONUCLEOPROTEIN_COMPLEX_BINDING		144	0.592204	2.37842	0	0	0	2605	tags=47%, list=19%, signal=57%
GOMF_TRANSLATION_INITIATION_FACTOR_ACTIVITY	GOMF_TRANSLATION_INITIATION_FACTOR_ACTIVITY		46	0.717909	2.37607	0	0	0	1768	tags=57%, list=13%, signal=65%
GOCC_PRERIBOSOME_LARGE_SUBUNIT_PRECURSOR	GOCC_PRERIBOSOME_LARGE_SUBUNIT_PRECURSOR		22	0.840749	2.37285	0	0	0	1768	tags=82%, list=13%, signal=94%
GOCC_PROTEASOME_COMPLEX	GOCC_PROTEASOME_COMPLEX		59	0.67282	2.36579	0	0	0	2474	tags=63%, list=18%, signal=76%
GOCC_SMALL_SUBUNIT_PROCESSOME	GOCC_SMALL_SUBUNIT_PROCESSOME		33	0.773168	2.35662	0	0	0	1862	tags=76%, list=14%, signal=88%
GOBP_MATURATION_OF_5_8S_RRNA	GOBP_MATURATION_OF_5_8S_RRNA		34	0.747338	2.3542	0	0	0	1788	tags=65%, list=13%, signal=74%
GOBP_SPINDLE_CHECKPOINT_SIGNALING	GOBP_SPINDLE_CHECKPOINT_SIGNALING		47	0.698812	2.35334	0	0	0	1921	tags=51%, list=14%, signal=59%
GOBP_AMINO_ACID_ACTIVATION	GOBP_AMINO_ACID_ACTIVATION		41	0.719603	2.35302	0	0	0	2453	tags=68%, list=18%, signal=83%
GOCC_U2_TYPE_CATALYTIC_STEP_2_SPLICEOSOME	GOCC_U2_TYPE_CATALYTIC_STEP_2_SPLICEOSOME		30	0.783651	2.34796	0	0	0	1133	tags=60%, list=8%, signal=65%
GOCC_SMALL_NUCLEAR_RIBONUCLEOPROTEIN_COMPLEX	GOCC_SMALL_NUCLEAR_RIBONUCLEOPROTEIN_COMPLEX		60	0.676281	2.34636	0	0	0	2781	tags=63%, list=20%, signal=79%
GOMF_LIGASE_ACTIVITY_FORMING_CARBON_OXYGEN_BONDS	GOMF_LIGASE_ACTIVITY_FORMING_CARBON_OXYGEN_BONDS		39	0.724885	2.33793	0	0	0	2453	tags=69%, list=18%, signal=84%
GOBP_RNA_PHOSPHODIESTER_BOND_HYDROLYSIS	GOBP_RNA_PHOSPHODIESTER_BOND_HYDROLYSIS		61	0.675003	2.3368	0	0	0	2120	tags=57%, list=16%, signal=68%
GOBP_ATP_BIOSYNTHETIC_PROCESS	GOBP_ATP_BIOSYNTHETIC_PROCESS		77	0.640915	2.33089	0	0	0	2952	tags=71%, list=22%, signal=91%
GOBP_NUCLEOSIDE_TRIPHOSPHATE_BIOSYNTHETIC_PROCESS	GOBP_NUCLEOSIDE_TRIPHOSPHATE_BIOSYNTHETIC_PROCESS		98	0.622704	2.32931	0	0	0	3203	tags=68%, list=24%, signal=89%
GOCC_CYTOCHROME_COMPLEX	GOCC_CYTOCHROME_COMPLEX		28	0.770298	2.32681	0	0	0	1795	tags=68%, list=13%, signal=78%
GOBP_TRNA_MODIFICATION	GOBP_TRNA_MODIFICATION		76	0.635753	2.32485	0	0	0	2447	tags=49%, list=18%, signal=59%
GOBP_REGULATION_OF_TELOMERE_MAINTENANCE_VIA_TELOMERASE	GOBP_REGULATION_OF_TELOMERE_MAINTENANCE_VIA_TELOMERASE		45	0.706562	2.32128	0	0	0	2120	tags=58%, list=16%, signal=68%
GOMF_TRANSLATION_FACTOR_ACTIVITY_RNA_BINDING	GOMF_TRANSLATION_FACTOR_ACTIVITY_RNA_BINDING		72	0.646195	2.31706	0	0	0	1893	tags=51%, list=14%, signal=59%
GOMF_TRANSLATION_REGULATOR_ACTIVITY_NUCLEIC_ACID_BINDING	GOMF_TRANSLATION_REGULATOR_ACTIVITY_NUCLEIC_ACID_BINDING		88	0.623339	2.31642	0	0	0	1768	tags=47%, list=13%, signal=53%
GOBP_REGULATION_OF_MITOCHONDRIAL_TRANSLATION	GOBP_REGULATION_OF_MITOCHONDRIAL_TRANSLATION		21	0.82434	2.31188	0	0	0	1252	tags=67%, list=9%, signal=73%
GOBP_TELOMERE_MAINTENANCE_VIA_TELOMERE_LENGTHENING	GOBP_TELOMERE_MAINTENANCE_VIA_TELOMERE_LENGTHENING		71	0.648573	2.30897	0	0	0	2361	tags=51%, list=17%, signal=61%
GOBP_CHROMOSOME_ORGANIZATION	GOBP_CHROMOSOME_ORGANIZATION		433	0.51187	2.29275	0	0	0	2361	tags=36%, list=17%, signal=43%
GOCC_EXORIBONUCLEASE_COMPLEX	GOCC_EXORIBONUCLEASE_COMPLEX		24	0.795372	2.29197	0	0	0	2404	tags=79%, list=18%, signal=96%
GOBP_MITOTIC_METAPHASE_PLATE_CONGRESSION	GOBP_MITOTIC_METAPHASE_PLATE_CONGRESSION		49	0.692303	2.28361	0	0	0	2481	tags=51%, list=18%, signal=62%
GOMF_TRANSLATION_REGULATOR_ACTIVITY	GOMF_TRANSLATION_REGULATOR_ACTIVITY		115	0.583447	2.28161	0	0	0	1893	tags=43%, list=14%, signal=49%
GOBP_MITOCHONDRIAL_ELECTRON_TRANSPORT_NADH_TO_UBIQUINONE	GOBP_MITOCHONDRIAL_ELECTRON_TRANSPORT_NADH_TO_UBIQUINONE		23	0.79378	2.27949	0	0	0	2092	tags=83%, list=15%, signal=98%
GOBP_CLEAVAGE_INVOLVED_IN_RRNA_PROCESSING	GOBP_CLEAVAGE_INVOLVED_IN_RRNA_PROCESSING		27	0.777015	2.27848	0	0	0	1862	tags=70%, list=14%, signal=81%
GOBP_NEGATIVE_REGULATION_OF_CHROMOSOME_ORGANIZATION	GOBP_NEGATIVE_REGULATION_OF_CHROMOSOME_ORGANIZATION		87	0.611861	2.27715	0	0	0	1921	tags=41%, list=14%, signal=48%
GOMF_OXIDOREDUCTASE_ACTIVITY_ACTING_ON_NAD_P_H_QUINONE_OR_SIMILAR_COMPOUND_AS_ACCEPTOR	GOMF_OXIDOREDUCTASE_ACTIVITY_ACTING_ON_NAD_P_H_QUINONE_OR_SIMILAR_COMPOUND_AS_ACCEPTOR		27	0.763528	2.26723	0	0	0	2165	tags=78%, list=16%, signal=92%
GOCC_ENDOPEPTIDASE_COMPLEX	GOCC_ENDOPEPTIDASE_COMPLEX		84	0.607199	2.26121	0	0	0	3444	tags=64%, list=25%, signal=86%
GOCC_SPLICEOSOMAL_TRI_SNRNP_COMPLEX	GOCC_SPLICEOSOMAL_TRI_SNRNP_COMPLEX		28	0.760374	2.26022	0	0	0	2716	tags=79%, list=20%, signal=98%
GOBP_MITOCHONDRIAL_RNA_METABOLIC_PROCESS	GOBP_MITOCHONDRIAL_RNA_METABOLIC_PROCESS		42	0.689935	2.25689	0	0	0	2399	tags=57%, list=18%, signal=69%
GOMF_RNA_METHYLTRANSFERASE_ACTIVITY	GOMF_RNA_METHYLTRANSFERASE_ACTIVITY		51	0.648987	2.25312	0	0	0	3377	tags=63%, list=25%, signal=83%
GOBP_REGULATION_OF_TELOMERE_MAINTENANCE_VIA_TELOMERE_LENGTHENING	GOBP_REGULATION_OF_TELOMERE_MAINTENANCE_VIA_TELOMERE_LENGTHENING		54	0.654029	2.24919	0	0	0	2120	tags=50%, list=16%, signal=59%
GOBP_CYTOPLASMIC_TRANSLATIONAL_INITIATION	GOBP_CYTOPLASMIC_TRANSLATIONAL_INITIATION		29	0.756173	2.24892	0	0	0	1819	tags=48%, list=13%, signal=56%
GOMF_STRUCTURAL_MOLECULE_ACTIVITY	GOMF_STRUCTURAL_MOLECULE_ACTIVITY		453	0.49819	2.24888	0	0	0	1173	tags=31%, list=9%, signal=33%
GOBP_TRANSLATIONAL_INITIATION	GOBP_TRANSLATIONAL_INITIATION		99	0.593029	2.2402	0	0	0	1819	tags=35%, list=13%, signal=41%
GOBP_MATURATION_OF_5_8S_RRNA_FROM_TRICISTRONIC_RRNA_TRANSCRIPT_SSU_RRNA_5_8S_RRNA_LSU_RRNA	GOBP_MATURATION_OF_5_8S_RRNA_FROM_TRICISTRONIC_RRNA_TRANSCRIPT_SSU_RRNA_5_8S_RRNA_LSU_RRNA		24	0.761916	2.23839	0	0	0	1788	tags=63%, list=13%, signal=72%
GOMF_ENDORIBONUCLEASE_ACTIVITY_PRODUCING_5_PHOSPHOMONOESTERS	GOMF_ENDORIBONUCLEASE_ACTIVITY_PRODUCING_5_PHOSPHOMONOESTERS		22	0.803665	2.23621	0	0	0	1853	tags=68%, list=14%, signal=79%
GOCC_PEPTIDASE_COMPLEX	GOCC_PEPTIDASE_COMPLEX		117	0.573279	2.23089	0	0	0	3444	tags=62%, list=25%, signal=82%
GOCC_PROTEASOME_CORE_COMPLEX	GOCC_PROTEASOME_CORE_COMPLEX		17	0.845317	2.22057	0	0	0	1633	tags=88%, list=12%, signal=100%
GOCC_SNO_S_RNA_CONTAINING_RIBONUCLEOPROTEIN_COMPLEX	GOCC_SNO_S_RNA_CONTAINING_RIBONUCLEOPROTEIN_COMPLEX		20	0.816186	2.21961	0	0	0	1580	tags=75%, list=12%, signal=85%
GOBP_REGULATION_OF_CHROMOSOME_ORGANIZATION	GOBP_REGULATION_OF_CHROMOSOME_ORGANIZATION		221	0.527811	2.2115	0	6.65814e-06	0.001	2361	tags=39%, list=17%, signal=46%
GOMF_ENDONUCLEASE_ACTIVITY	GOMF_ENDONUCLEASE_ACTIVITY		97	0.586311	2.21284	0	6.71867e-06	0.001	2511	tags=40%, list=19%, signal=49%
GOBP_SNRNA_METABOLIC_PROCESS	GOBP_SNRNA_METABOLIC_PROCESS		44	0.677311	2.20453	0	1.27469e-05	0.002	2674	tags=57%, list=20%, signal=71%
GOMF_RNA_POLYMERASE_ACTIVITY	GOMF_RNA_POLYMERASE_ACTIVITY		31	0.710514	2.20677	0	1.28587e-05	0.002	3127	tags=71%, list=23%, signal=92%
GOCC_RNA_POLYMERASE_COMPLEX	GOCC_RNA_POLYMERASE_COMPLEX		98	0.581209	2.20733	0	1.29725e-05	0.002	3127	tags=50%, list=23%, signal=65%
GOCC_NUCLEOID	GOCC_NUCLEOID		42	0.676039	2.21015	0	1.30883e-05	0.002	3770	tags=79%, list=28%, signal=108%
GOMF_SNORNA_BINDING	GOMF_SNORNA_BINDING		29	0.727666	2.17922	0	1.82205e-05	0.003	1696	tags=55%, list=12%, signal=63%
GOBP_NUCLEOSIDE_PHOSPHATE_BIOSYNTHETIC_PROCESS	GOBP_NUCLEOSIDE_PHOSPHATE_BIOSYNTHETIC_PROCESS		206	0.525207	2.18166	0	1.83736e-05	0.003	3153	tags=53%, list=23%, signal=69%
GOCC_MITOCHONDRIAL_RESPIRATORY_CHAIN_COMPLEX_IV	GOCC_MITOCHONDRIAL_RESPIRATORY_CHAIN_COMPLEX_IV		16	0.848109	2.18607	0	1.85293e-05	0.003	1795	tags=81%, list=13%, signal=94%
GOBP_RRNA_MODIFICATION	GOBP_RRNA_MODIFICATION		29	0.743976	2.19386	0	1.86877e-05	0.003	2205	tags=62%, list=16%, signal=74%
GOBP_PROTEIN_FOLDING	GOBP_PROTEIN_FOLDING		139	0.558198	2.19893	0	1.88488e-05	0.003	2649	tags=44%, list=20%, signal=54%
GOBP_VIRAL_TRANSLATION	GOBP_VIRAL_TRANSLATION		18	0.815772	2.15612	0	2.30496e-05	0.004	1542	tags=56%, list=11%, signal=63%
GOCC_CONDENSED_CHROMOSOME	GOCC_CONDENSED_CHROMOSOME		214	0.515345	2.16658	0	2.3234e-05	0.004	2361	tags=38%, list=17%, signal=45%
GOBP_TELOMERE_ORGANIZATION	GOBP_TELOMERE_ORGANIZATION		140	0.545266	2.16804	0	2.34213e-05	0.004	2361	tags=38%, list=17%, signal=45%
GOBP_RIBOSE_PHOSPHATE_BIOSYNTHETIC_PROCESS	GOBP_RIBOSE_PHOSPHATE_BIOSYNTHETIC_PROCESS		172	0.530148	2.16933	0	2.36117e-05	0.004	3153	tags=55%, list=23%, signal=70%
GOBP_RIBOSOMAL_SMALL_SUBUNIT_ASSEMBLY	GOBP_RIBOSOMAL_SMALL_SUBUNIT_ASSEMBLY		18	0.82035	2.17225	0	2.38053e-05	0.004	1788	tags=89%, list=13%, signal=102%
GOCC_RESPIRATORY_CHAIN_COMPLEX_IV	GOCC_RESPIRATORY_CHAIN_COMPLEX_IV		18	0.8126	2.17385	0	2.4002e-05	0.004	1795	tags=72%, list=13%, signal=83%
GOBP_POSITIVE_REGULATION_OF_TELOMERE_MAINTENANCE_VIA_TELOMERE_LENGTHENING	GOBP_POSITIVE_REGULATION_OF_TELOMERE_MAINTENANCE_VIA_TELOMERE_LENGTHENING		35	0.683649	2.15056	0	3.41002e-05	0.006	2305	tags=57%, list=17%, signal=69%
GOBP_REGULATION_OF_TELOMERE_MAINTENANCE	GOBP_REGULATION_OF_TELOMERE_MAINTENANCE		90	0.565438	2.14584	0	3.89857e-05	0.007	2361	tags=42%, list=17%, signal=51%
GOBP_RNA_3_END_PROCESSING	GOBP_RNA_3_END_PROCESSING		91	0.576925	2.14668	0	3.9288e-05	0.007	2455	tags=43%, list=18%, signal=52%
GOBP_SISTER_CHROMATID_SEGREGATION	GOBP_SISTER_CHROMATID_SEGREGATION		193	0.514245	2.14782	0	3.95949e-05	0.007	2332	tags=37%, list=17%, signal=44%
GOBP_PROTEIN_TARGETING_TO_MITOCHONDRION	GOBP_PROTEIN_TARGETING_TO_MITOCHONDRION		67	0.603245	2.14101	0	5.34451e-05	0.01	2948	tags=54%, list=22%, signal=68%
GOBP_ESTABLISHMENT_OF_PROTEIN_LOCALIZATION_TO_CHROMOSOME	GOBP_ESTABLISHMENT_OF_PROTEIN_LOCALIZATION_TO_CHROMOSOME		23	0.729199	2.1413	0	5.38439e-05	0.01	1032	tags=48%, list=8%, signal=52%
GOMF_NUCLEASE_ACTIVITY	GOMF_NUCLEASE_ACTIVITY		158	0.524034	2.14175	0	5.42488e-05	0.01	2511	tags=36%, list=19%, signal=44%
GOBP_REGULATION_OF_MITOTIC_SISTER_CHROMATID_SEGREGATION	GOBP_REGULATION_OF_MITOTIC_SISTER_CHROMATID_SEGREGATION		50	0.64033	2.14216	0	5.46598e-05	0.01	2481	tags=50%, list=18%, signal=61%
GOCC_U2_SNRNP	GOCC_U2_SNRNP		18	0.796108	2.14288	0	5.5077e-05	0.01	2218	tags=83%, list=16%, signal=99%
GOBP_SNRNA_PROCESSING	GOBP_SNRNA_PROCESSING		22	0.747142	2.13352	0	5.7507e-05	0.011	1530	tags=55%, list=11%, signal=61%
GOBP_CELLULAR_AMINO_ACID_METABOLIC_PROCESS	GOBP_CELLULAR_AMINO_ACID_METABOLIC_PROCESS		200	0.514868	2.13508	0	5.79268e-05	0.011	3128	tags=46%, list=23%, signal=59%
GOBP_RNA_5_END_PROCESSING	GOBP_RNA_5_END_PROCESSING		18	0.796526	2.13543	0	5.83527e-05	0.011	1788	tags=72%, list=13%, signal=83%
GOCC_ORGANELLE_ENVELOPE_LUMEN	GOCC_ORGANELLE_ENVELOPE_LUMEN		82	0.587739	2.12961	0	6.13719e-05	0.012	3435	tags=57%, list=25%, signal=76%
GOBP_MATURATION_OF_LSU_RRNA_FROM_TRICISTRONIC_RRNA_TRANSCRIPT_SSU_RRNA_5_8S_RRNA_LSU_RRNA	GOBP_MATURATION_OF_LSU_RRNA_FROM_TRICISTRONIC_RRNA_TRANSCRIPT_SSU_RRNA_5_8S_RRNA_LSU_RRNA		15	0.816238	2.13077	0	6.18103e-05	0.012	1255	tags=67%, list=9%, signal=73%
GOBP_PURINE_CONTAINING_COMPOUND_BIOSYNTHETIC_PROCESS	GOBP_PURINE_CONTAINING_COMPOUND_BIOSYNTHETIC_PROCESS		175	0.521314	2.13176	0	6.2255e-05	0.012	3129	tags=53%, list=23%, signal=68%
GOBP_NUCLEOSIDE_MONOPHOSPHATE_BIOSYNTHETIC_PROCESS	GOBP_NUCLEOSIDE_MONOPHOSPHATE_BIOSYNTHETIC_PROCESS		42	0.656492	2.1274	0	6.60874e-05	0.013	3153	tags=60%, list=23%, signal=77%
GOBP_POSITIVE_REGULATION_OF_TELOMERE_MAINTENANCE	GOBP_POSITIVE_REGULATION_OF_TELOMERE_MAINTENANCE		68	0.593207	2.11845	0	8.61611e-05	0.017	2361	tags=47%, list=17%, signal=57%
GOBP_NCRNA_CATABOLIC_PROCESS	GOBP_NCRNA_CATABOLIC_PROCESS		35	0.678822	2.11451	0	8.93346e-05	0.018	2447	tags=57%, list=18%, signal=70%
GOCC_CHROMOSOME_CENTROMERIC_REGION	GOCC_CHROMOSOME_CENTROMERIC_REGION		205	0.503977	2.11512	0	8.99507e-05	0.018	2352	tags=38%, list=17%, signal=45%
GOBP_REGULATION_OF_SIGNAL_TRANSDUCTION_BY_P53_CLASS_MEDIATOR	GOBP_REGULATION_OF_SIGNAL_TRANSDUCTION_BY_P53_CLASS_MEDIATOR		70	0.59603	2.11585	0	9.05753e-05	0.018	557	tags=20%, list=4%, signal=21%
GOBP_PROTEIN_LOCALIZATION_TO_MITOCHONDRION	GOBP_PROTEIN_LOCALIZATION_TO_MITOCHONDRION		88	0.570316	2.10749	0	9.24267e-05	0.019	2948	tags=51%, list=22%, signal=65%
GOBP_PSEUDOURIDINE_SYNTHESIS	GOBP_PSEUDOURIDINE_SYNTHESIS		18	0.791741	2.10775	0	9.30513e-05	0.019	2205	tags=72%, list=16%, signal=86%
GOCC_CYTOPLASMIC_EXOSOME_RNASE_COMPLEX	GOCC_CYTOPLASMIC_EXOSOME_RNASE_COMPLEX		16	0.821876	2.11022	0	9.36842e-05	0.019	2404	tags=94%, list=18%, signal=114%
GOBP_SNRNA_3_END_PROCESSING	GOBP_SNRNA_3_END_PROCESSING		19	0.781743	2.10479	0	9.60413e-05	0.02	1530	tags=58%, list=11%, signal=65%
GOMF_NAD_P_H_DEHYDROGENASE_QUINONE_ACTIVITY	GOMF_NAD_P_H_DEHYDROGENASE_QUINONE_ACTIVITY		18	0.788169	2.10635	0.00204499	9.66816e-05	0.02	2787	tags=94%, list=21%, signal=119%
GOMF_ENDORIBONUCLEASE_ACTIVITY	GOMF_ENDORIBONUCLEASE_ACTIVITY		48	0.620787	2.10399	0	0.000100185	0.021	2436	tags=50%, list=18%, signal=61%
GOCC_ENDOPLASMIC_RETICULUM_PROTEIN_CONTAINING_COMPLEX	GOCC_ENDOPLASMIC_RETICULUM_PROTEIN_CONTAINING_COMPLEX		117	0.540507	2.10125	0	0.000112852	0.024	3343	tags=47%, list=25%, signal=62%
GOMF_METAL_CLUSTER_BINDING	GOMF_METAL_CLUSTER_BINDING		57	0.61249	2.10249	0	0.00011359	0.024	3140	tags=60%, list=23%, signal=77%
GOMF_SINGLE_STRANDED_DNA_HELICASE_ACTIVITY	GOMF_SINGLE_STRANDED_DNA_HELICASE_ACTIVITY		23	0.74014	2.0978	0	0.00011625	0.025	1752	tags=57%, list=13%, signal=65%
GOBP_POSITIVE_REGULATION_OF_CHROMOSOME_ORGANIZATION	GOBP_POSITIVE_REGULATION_OF_CHROMOSOME_ORGANIZATION		98	0.555603	2.09933	0	0.000117	0.025	2515	tags=43%, list=19%, signal=52%
GOBP_ATTACHMENT_OF_SPINDLE_MICROTUBULES_TO_KINETOCHORE	GOBP_ATTACHMENT_OF_SPINDLE_MICROTUBULES_TO_KINETOCHORE		35	0.662691	2.09597	0	0.000120062	0.026	2481	tags=57%, list=18%, signal=70%
GOBP_PROTEIN_LOCALIZATION_TO_CHROMOSOME	GOBP_PROTEIN_LOCALIZATION_TO_CHROMOSOME		85	0.564385	2.09412	0	0.00012617	0.028	1605	tags=33%, list=12%, signal=37%
GOBP_METAPHASE_PLATE_CONGRESSION	GOBP_METAPHASE_PLATE_CONGRESSION		61	0.605675	2.0948	0	0.000126958	0.028	2481	tags=48%, list=18%, signal=58%
GOBP_ESTABLISHMENT_OF_PROTEIN_LOCALIZATION_TO_TELOMERE	GOBP_ESTABLISHMENT_OF_PROTEIN_LOCALIZATION_TO_TELOMERE		18	0.786819	2.09485	0	0.000127757	0.028	1032	tags=56%, list=8%, signal=60%
GOBP_DNA_DUPLEX_UNWINDING	GOBP_DNA_DUPLEX_UNWINDING		42	0.641058	2.09492	0	0.000128565	0.028	2361	tags=48%, list=17%, signal=57%
GOCC_CONDENSED_CHROMOSOME_CENTROMERIC_REGION	GOCC_CONDENSED_CHROMOSOME_CENTROMERIC_REGION		152	0.521097	2.08908	0	0.000138898	0.031	2139	tags=38%, list=16%, signal=45%
GOMF_UNFOLDED_PROTEIN_BINDING	GOMF_UNFOLDED_PROTEIN_BINDING		79	0.565072	2.08361	0	0.000165055	0.037	2627	tags=46%, list=19%, signal=56%
GOBP_RRNA_CATABOLIC_PROCESS	GOBP_RRNA_CATABOLIC_PROCESS		21	0.763098	2.08174	0	0.000172846	0.039	1738	tags=57%, list=13%, signal=65%
GOMF_OXIDOREDUCTASE_ACTIVITY_ACTING_ON_NAD_P_H	GOMF_OXIDOREDUCTASE_ACTIVITY_ACTING_ON_NAD_P_H		53	0.611811	2.08144	0	0.000176153	0.04	2846	tags=57%, list=21%, signal=71%
GOMF_UBIQUITIN_PROTEIN_TRANSFERASE_REGULATOR_ACTIVITY	GOMF_UBIQUITIN_PROTEIN_TRANSFERASE_REGULATOR_ACTIVITY		22	0.7303	2.08031	0	0.000183801	0.042	974	tags=45%, list=7%, signal=49%
GOMF_ATP_DEPENDENT_ACTIVITY_ACTING_ON_RNA	GOMF_ATP_DEPENDENT_ACTIVITY_ACTING_ON_RNA		64	0.586876	2.07706	0	0.000190163	0.044	3332	tags=52%, list=25%, signal=68%
GOMF_LIGASE_ACTIVITY	GOMF_LIGASE_ACTIVITY		135	0.525552	2.07754	0	0.000191302	0.044	3045	tags=49%, list=22%, signal=62%
GOBP_POSITIVE_REGULATION_OF_SIGNAL_TRANSDUCTION_BY_P53_CLASS_MEDIATOR	GOBP_POSITIVE_REGULATION_OF_SIGNAL_TRANSDUCTION_BY_P53_CLASS_MEDIATOR		25	0.717399	2.07423	0	0.000201775	0.047	180	tags=28%, list=1%, signal=28%
GOBP_MRNA_MODIFICATION	GOBP_MRNA_MODIFICATION		27	0.691243	2.06958	0	0.000221952	0.051	1819	tags=48%, list=13%, signal=55%
GOBP_DNA_STRAND_ELONGATION	GOBP_DNA_STRAND_ELONGATION		36	0.66889	2.06814	0	0.000223636	0.052	2515	tags=56%, list=19%, signal=68%
GOBP_DNA_TEMPLATED_DNA_REPLICATION	GOBP_DNA_TEMPLATED_DNA_REPLICATION		136	0.523001	2.06868	0	0.000224944	0.052	3059	tags=42%, list=23%, signal=54%
GOBP_MITOCHONDRION_ORGANIZATION	GOBP_MITOCHONDRION_ORGANIZATION		442	0.456255	2.06272	0	0.000240725	0.057	2966	tags=42%, list=22%, signal=52%
GOBP_REGULATION_OF_SPINDLE_CHECKPOINT	GOBP_REGULATION_OF_SPINDLE_CHECKPOINT		21	0.738111	2.06278	0	0.000242108	0.057	1744	tags=48%, list=13%, signal=55%
GOMF_RIBONUCLEASE_ACTIVITY	GOMF_RIBONUCLEASE_ACTIVITY		83	0.553527	2.06325	0	0.000243508	0.057	2451	tags=41%, list=18%, signal=50%
GOMF_NADH_DEHYDROGENASE_QUINONE_ACTIVITY	GOMF_NADH_DEHYDROGENASE_QUINONE_ACTIVITY		15	0.821857	2.05819	0	0.000260258	0.061	2048	tags=93%, list=15%, signal=110%
GOBP_NUCLEOSIDE_MONOPHOSPHATE_METABOLIC_PROCESS	GOBP_NUCLEOSIDE_MONOPHOSPHATE_METABOLIC_PROCESS		57	0.593189	2.05592	0	0.000263037	0.062	3153	tags=53%, list=23%, signal=68%
GOCC_PROTEIN_DNA_COMPLEX	GOCC_PROTEIN_DNA_COMPLEX		128	0.519309	2.05479	0	0.000265535	0.063	2408	tags=38%, list=18%, signal=46%
GOBP_DICARBOXYLIC_ACID_METABOLIC_PROCESS	GOBP_DICARBOXYLIC_ACID_METABOLIC_PROCESS		71	0.569008	2.04714	0	0.000266313	0.065	3243	tags=51%, list=24%, signal=66%
GOBP_NEGATIVE_REGULATION_OF_UBIQUITIN_PROTEIN_TRANSFERASE_ACTIVITY	GOBP_NEGATIVE_REGULATION_OF_UBIQUITIN_PROTEIN_TRANSFERASE_ACTIVITY		20	0.745064	2.05363	0	0.000266649	0.064	280	tags=40%, list=2%, signal=41%
GOBP_REGULATION_OF_TELOMERASE_ACTIVITY	GOBP_REGULATION_OF_TELOMERASE_ACTIVITY		46	0.623119	2.04938	0	0.000267776	0.065	2515	tags=43%, list=19%, signal=53%
GOBP_PROTEIN_LOCALIZATION_TO_CHROMOSOME_CENTROMERIC_REGION	GOBP_PROTEIN_LOCALIZATION_TO_CHROMOSOME_CENTROMERIC_REGION		22	0.747305	2.05417	0	0.000268139	0.064	1211	tags=50%, list=9%, signal=55%
GOBP_SMALL_REGULATORY_NCRNA_3_END_PROCESSING	GOBP_SMALL_REGULATORY_NCRNA_3_END_PROCESSING		17	0.786094	2.05001	0	0.000269255	0.065	1530	tags=71%, list=11%, signal=79%
GOCC_SMN_SM_PROTEIN_COMPLEX	GOCC_SMN_SM_PROTEIN_COMPLEX		17	0.772676	2.04131	0	0.000308512	0.075	2288	tags=76%, list=17%, signal=92%
GOBP_ENERGY_DERIVATION_BY_OXIDATION_OF_ORGANIC_COMPOUNDS	GOBP_ENERGY_DERIVATION_BY_OXIDATION_OF_ORGANIC_COMPOUNDS		259	0.474902	2.04003	0	0.000318663	0.078	2787	tags=46%, list=21%, signal=57%
GOCC_ENDONUCLEASE_COMPLEX	GOCC_ENDONUCLEASE_COMPLEX		31	0.668755	2.03828	0	0.000324796	0.08	2916	tags=55%, list=21%, signal=70%
GOCC_TELOMERASE_HOLOENZYME_COMPLEX	GOCC_TELOMERASE_HOLOENZYME_COMPLEX		21	0.719181	2.03431	0	0.000348167	0.086	1729	tags=52%, list=13%, signal=60%
GOCC_CHROMOSOMAL_REGION	GOCC_CHROMOSOMAL_REGION		296	0.467652	2.03506	0	0.000350029	0.086	2361	tags=33%, list=17%, signal=40%
GOBP_RRNA_TRANSCRIPTION	GOBP_RRNA_TRANSCRIPTION		29	0.664956	2.03317	0	0.00036174	0.09	2503	tags=48%, list=18%, signal=59%
GOBP_PROTEIN_LOCALIZATION_TO_CONDENSED_CHROMOSOME	GOBP_PROTEIN_LOCALIZATION_TO_CONDENSED_CHROMOSOME		16	0.7838	2.03308	0	0.000363726	0.091	1211	tags=56%, list=9%, signal=62%
GOBP_MITOTIC_SISTER_CHROMATID_SEPARATION	GOBP_MITOTIC_SISTER_CHROMATID_SEPARATION		92	0.533834	2.03134	0	0.000380747	0.096	2126	tags=38%, list=16%, signal=45%
GOMF_TRANSFERASE_ACTIVITY_TRANSFERRING_ALKYL_OR_ARYL_OTHER_THAN_METHYL_GROUPS	GOMF_TRANSFERASE_ACTIVITY_TRANSFERRING_ALKYL_OR_ARYL_OTHER_THAN_METHYL_GROUPS		56	0.5977	2.03043	0	0.000386446	0.098	3602	tags=57%, list=27%, signal=77%
GOCC_PROTEASOME_ACCESSORY_COMPLEX	GOCC_PROTEASOME_ACCESSORY_COMPLEX		23	0.730959	2.02779	0	0.000403306	0.102	2403	tags=78%, list=18%, signal=95%
GOBP_INNER_MITOCHONDRIAL_MEMBRANE_ORGANIZATION	GOBP_INNER_MITOCHONDRIAL_MEMBRANE_ORGANIZATION		28	0.669601	2.02591	0	0.000416212	0.105	3083	tags=61%, list=23%, signal=78%
GOBP_ESTABLISHMENT_OF_PROTEIN_LOCALIZATION_TO_MITOCHONDRIAL_MEMBRANE	GOBP_ESTABLISHMENT_OF_PROTEIN_LOCALIZATION_TO_MITOCHONDRIAL_MEMBRANE		23	0.719046	2.02434	0	0.00041779	0.106	2655	tags=61%, list=20%, signal=76%
GOBP_RNA_METHYLATION	GOBP_RNA_METHYLATION		60	0.570657	2.02333	0	0.000430483	0.11	3377	tags=53%, list=25%, signal=71%
GOCC_INTRINSIC_COMPONENT_OF_MITOCHONDRIAL_INNER_MEMBRANE	GOCC_INTRINSIC_COMPONENT_OF_MITOCHONDRIAL_INNER_MEMBRANE		39	0.622679	2.01705	0	0.000451917	0.117	4668	tags=82%, list=34%, signal=125%
GOBP_PROTEIN_INSERTION_INTO_MEMBRANE	GOBP_PROTEIN_INSERTION_INTO_MEMBRANE		45	0.604332	2.01741	0	0.000454211	0.117	2946	tags=49%, list=22%, signal=62%
GOBP_IRON_SULFUR_CLUSTER_ASSEMBLY	GOBP_IRON_SULFUR_CLUSTER_ASSEMBLY		21	0.718826	2.00989	0	0.000489794	0.126	2155	tags=57%, list=16%, signal=68%
GOBP_CHROMOSOME_SEGREGATION	GOBP_CHROMOSOME_SEGREGATION		295	0.464158	2.00812	0	0.000505459	0.129	2397	tags=33%, list=18%, signal=39%
GOBP_RNA_PHOSPHODIESTER_BOND_HYDROLYSIS_ENDONUCLEOLYTIC	GOBP_RNA_PHOSPHODIESTER_BOND_HYDROLYSIS_ENDONUCLEOLYTIC		27	0.675033	2.00806	0	0.000506518	0.13	1987	tags=59%, list=15%, signal=69%
GOBP_PROTEIN_TRANSMEMBRANE_IMPORT_INTO_INTRACELLULAR_ORGANELLE	GOBP_PROTEIN_TRANSMEMBRANE_IMPORT_INTO_INTRACELLULAR_ORGANELLE		33	0.661521	2.00442	0	0.000544447	0.142	2873	tags=70%, list=21%, signal=88%
GOBP_DNA_REPLICATION_INITIATION	GOBP_DNA_REPLICATION_INITIATION		29	0.677564	2.00468	0	0.000547142	0.142	2988	tags=45%, list=22%, signal=57%
GOBP_CHAPERONE_MEDIATED_PROTEIN_COMPLEX_ASSEMBLY	GOBP_CHAPERONE_MEDIATED_PROTEIN_COMPLEX_ASSEMBLY		16	0.765806	2.00374	0	0.000548938	0.143	1782	tags=63%, list=13%, signal=72%
GOCC_RNA_POLYMERASE_III_COMPLEX	GOCC_RNA_POLYMERASE_III_COMPLEX		18	0.740842	2.00076	0	0.000571124	0.149	2413	tags=61%, list=18%, signal=74%
GOBP_DNA_REPLICATION	GOBP_DNA_REPLICATION		250	0.467071	1.99389	0	0.000660134	0.172	3064	tags=40%, list=23%, signal=50%
GOBP_REGULATION_OF_DNA_BIOSYNTHETIC_PROCESS	GOBP_REGULATION_OF_DNA_BIOSYNTHETIC_PROCESS		114	0.518005	1.99406	0	0.000663338	0.172	2781	tags=41%, list=20%, signal=51%
GOBP_PROTEIN_IMPORT_INTO_MITOCHONDRIAL_MATRIX	GOBP_PROTEIN_IMPORT_INTO_MITOCHONDRIAL_MATRIX		18	0.727409	1.99073	0	0.000698745	0.182	1890	tags=56%, list=14%, signal=64%
GOBP_DNA_CONFORMATION_CHANGE	GOBP_DNA_CONFORMATION_CHANGE		55	0.581968	1.98985	0	0.000702381	0.183	2361	tags=44%, list=17%, signal=53%
GOBP_PROTEIN_INSERTION_INTO_MITOCHONDRIAL_MEMBRANE	GOBP_PROTEIN_INSERTION_INTO_MITOCHONDRIAL_MEMBRANE		19	0.730558	1.98587	0	0.000737281	0.193	2655	tags=63%, list=20%, signal=78%
GOBP_DEOXYRIBONUCLEOSIDE_MONOPHOSPHATE_METABOLIC_PROCESS	GOBP_DEOXYRIBONUCLEOSIDE_MONOPHOSPHATE_METABOLIC_PROCESS		24	0.672117	1.98585	0	0.000737288	0.193	2437	tags=54%, list=18%, signal=66%
GOMF_TELOMERASE_RNA_BINDING	GOMF_TELOMERASE_RNA_BINDING		17	0.747674	1.98521	0	0.000747373	0.197	736	tags=41%, list=5%, signal=43%
GOBP_DNA_BIOSYNTHETIC_PROCESS	GOBP_DNA_BIOSYNTHETIC_PROCESS		162	0.488864	1.98113	0	0.000801167	0.214	2781	tags=39%, list=20%, signal=48%
GOBP_SNO_S_RNA_METABOLIC_PROCESS	GOBP_SNO_S_RNA_METABOLIC_PROCESS		16	0.763497	1.98141	0	0.000801513	0.213	2482	tags=75%, list=18%, signal=92%
GOBP_DNA_RECOMBINATION	GOBP_DNA_RECOMBINATION		236	0.466234	1.97766	0	0.000844125	0.228	3257	tags=41%, list=24%, signal=53%
GOBP_POSITIVE_REGULATION_OF_DNA_BIOSYNTHETIC_PROCESS	GOBP_POSITIVE_REGULATION_OF_DNA_BIOSYNTHETIC_PROCESS		76	0.544136	1.97785	0	0.000844682	0.227	2781	tags=45%, list=20%, signal=56%
GOMF_PROTEIN_FOLDING_CHAPERONE	GOMF_PROTEIN_FOLDING_CHAPERONE		32	0.645777	1.97658	0	0.000846352	0.231	2785	tags=66%, list=21%, signal=82%
GOBP_CHROMOSOME_SEPARATION	GOBP_CHROMOSOME_SEPARATION		119	0.509917	1.9769	0	0.000850252	0.231	2624	tags=39%, list=19%, signal=49%
GOBP_MITOCHONDRIAL_RNA_PROCESSING	GOBP_MITOCHONDRIAL_RNA_PROCESSING		16	0.764601	1.97393	0	0.000879121	0.238	2399	tags=69%, list=18%, signal=83%
GOBP_TRANSLATIONAL_ELONGATION	GOBP_TRANSLATIONAL_ELONGATION		41	0.613988	1.96987	0	0.00093146	0.252	2970	tags=61%, list=22%, signal=78%
GOBP_MITOCHONDRIAL_TRANSMEMBRANE_TRANSPORT	GOBP_MITOCHONDRIAL_TRANSMEMBRANE_TRANSPORT		64	0.558091	1.96854	0	0.00094388	0.256	2949	tags=48%, list=22%, signal=62%
GOBP_DEOXYRIBONUCLEOTIDE_METABOLIC_PROCESS	GOBP_DEOXYRIBONUCLEOTIDE_METABOLIC_PROCESS		39	0.610767	1.96717	0	0.00095289	0.26	2437	tags=46%, list=18%, signal=56%
GOCC_NUCLEAR_CHROMOSOME	GOCC_NUCLEAR_CHROMOSOME		189	0.480259	1.9656	0	0.000961819	0.262	3397	tags=49%, list=25%, signal=64%
GOBP_MITOCHONDRIAL_CYTOCHROME_C_OXIDASE_ASSEMBLY	GOBP_MITOCHONDRIAL_CYTOCHROME_C_OXIDASE_ASSEMBLY		16	0.75221	1.95862	0	0.00104998	0.289	1296	tags=56%, list=10%, signal=62%
GOBP_MITOTIC_CELL_CYCLE_CHECKPOINT_SIGNALING	GOBP_MITOTIC_CELL_CYCLE_CHECKPOINT_SIGNALING		129	0.500436	1.95909	0	0.00105291	0.288	3344	tags=49%, list=25%, signal=64%
GOMF_MRNA_5_UTR_BINDING	GOMF_MRNA_5_UTR_BINDING		26	0.669381	1.95972	0	0.0010544	0.287	1045	tags=38%, list=8%, signal=42%
GOBP_NUCLEAR_CHROMOSOME_SEGREGATION	GOBP_NUCLEAR_CHROMOSOME_SEGREGATION		238	0.461294	1.95864	0	0.00105462	0.289	2332	tags=33%, list=17%, signal=39%
GOCC_METHYLTRANSFERASE_COMPLEX	GOCC_METHYLTRANSFERASE_COMPLEX		88	0.522227	1.95689	0	0.0010865	0.299	2613	tags=41%, list=19%, signal=50%
GOMF_TRNA_METHYLTRANSFERASE_ACTIVITY	GOMF_TRNA_METHYLTRANSFERASE_ACTIVITY		30	0.652119	1.95562	0.00625	0.00110379	0.301	2447	tags=47%, list=18%, signal=57%
GOBP_RNA_SURVEILLANCE	GOBP_RNA_SURVEILLANCE		15	0.773783	1.95237	0	0.00114901	0.315	1530	tags=60%, list=11%, signal=68%
GOMF_OXIDOREDUCTASE_ACTIVITY_ACTING_ON_CH_OH_GROUP_OF_DONORS	GOMF_OXIDOREDUCTASE_ACTIVITY_ACTING_ON_CH_OH_GROUP_OF_DONORS		103	0.50222	1.95182	0	0.00115033	0.316	3037	tags=42%, list=22%, signal=53%
GOBP_REGULATION_OF_DNA_TEMPLATED_DNA_REPLICATION	GOBP_REGULATION_OF_DNA_TEMPLATED_DNA_REPLICATION		53	0.574481	1.9525	0	0.00115399	0.315	3219	tags=47%, list=24%, signal=62%
GOBP_TRICARBOXYLIC_ACID_CYCLE	GOBP_TRICARBOXYLIC_ACID_CYCLE		28	0.663423	1.95262	0.00206612	0.00115901	0.315	3037	tags=68%, list=22%, signal=87%
GOBP_RIBOSOMAL_SUBUNIT_EXPORT_FROM_NUCLEUS	GOBP_RIBOSOMAL_SUBUNIT_EXPORT_FROM_NUCLEUS		15	0.77534	1.9491	0	0.00118287	0.324	2534	tags=73%, list=19%, signal=90%
GOMF_RIBOSOME_BINDING	GOMF_RIBOSOME_BINDING		63	0.548224	1.94494	0	0.00127366	0.345	1326	tags=32%, list=10%, signal=35%
GOBP_CHROMOSOME_LOCALIZATION	GOBP_CHROMOSOME_LOCALIZATION		73	0.542419	1.94212	0	0.0013331	0.358	2317	tags=41%, list=17%, signal=49%
GOBP_NON_MEMBRANE_BOUNDED_ORGANELLE_ASSEMBLY	GOBP_NON_MEMBRANE_BOUNDED_ORGANELLE_ASSEMBLY		308	0.44746	1.94172	0	0.00133368	0.359	1960	tags=28%, list=14%, signal=32%
GOBP_PROTEIN_TRANSMEMBRANE_TRANSPORT	GOBP_PROTEIN_TRANSMEMBRANE_TRANSPORT		52	0.566924	1.9413	0	0.00134023	0.362	2873	tags=52%, list=21%, signal=66%
GOMF_GENERAL_TRANSCRIPTION_INITIATION_FACTOR_ACTIVITY	GOMF_GENERAL_TRANSCRIPTION_INITIATION_FACTOR_ACTIVITY		42	0.600163	1.94066	0	0.00134686	0.365	3089	tags=52%, list=23%, signal=68%
GOBP_POSITIVE_REGULATION_OF_TELOMERASE_ACTIVITY	GOBP_POSITIVE_REGULATION_OF_TELOMERASE_ACTIVITY		33	0.633202	1.94006	0.00214133	0.00135031	0.365	2120	tags=45%, list=16%, signal=54%
GOBP_NEGATIVE_REGULATION_OF_NUCLEAR_DIVISION	GOBP_NEGATIVE_REGULATION_OF_NUCLEAR_DIVISION		58	0.561495	1.93938	0	0.00135669	0.368	1921	tags=41%, list=14%, signal=48%
GOMF_OXIDOREDUCTASE_ACTIVITY_ACTING_ON_THE_ALDEHYDE_OR_OXO_GROUP_OF_DONORS_NAD_OR_NADP_AS_ACCEPTOR	GOMF_OXIDOREDUCTASE_ACTIVITY_ACTING_ON_THE_ALDEHYDE_OR_OXO_GROUP_OF_DONORS_NAD_OR_NADP_AS_ACCEPTOR		40	0.597658	1.93819	0	0.00139303	0.376	2591	tags=50%, list=19%, signal=62%
GOBP_RESPONSE_TO_INTERLEUKIN_4	GOBP_RESPONSE_TO_INTERLEUKIN_4		26	0.648385	1.93252	0	0.00153375	0.408	2573	tags=46%, list=19%, signal=57%
GOBP_SIGNAL_TRANSDUCTION_BY_P53_CLASS_MEDIATOR	GOBP_SIGNAL_TRANSDUCTION_BY_P53_CLASS_MEDIATOR		133	0.480102	1.92914	0	0.00155869	0.419	2471	tags=30%, list=18%, signal=36%
GOCC_RNA_POLYMERASE_II_HOLOENZYME	GOCC_RNA_POLYMERASE_II_HOLOENZYME		73	0.530907	1.92947	0	0.00156252	0.416	3108	tags=47%, list=23%, signal=60%
GOBP_BASE_EXCISION_REPAIR	GOBP_BASE_EXCISION_REPAIR		36	0.60644	1.92919	0.00412371	0.001565	0.419	3337	tags=64%, list=25%, signal=85%
GOCC_CORE_MEDIATOR_COMPLEX	GOCC_CORE_MEDIATOR_COMPLEX		26	0.678293	1.92947	0.00215983	0.00156889	0.416	1818	tags=42%, list=13%, signal=49%
GOBP_REGULATION_OF_CHROMOSOME_SEPARATION	GOBP_REGULATION_OF_CHROMOSOME_SEPARATION		101	0.510985	1.93034	0	0.00156931	0.416	2624	tags=40%, list=19%, signal=49%
GOMF_NUCLEOTIDYLTRANSFERASE_ACTIVITY	GOMF_NUCLEOTIDYLTRANSFERASE_ACTIVITY		103	0.505733	1.92502	0	0.00167794	0.44	3240	tags=50%, list=24%, signal=66%
GOBP_GENERATION_OF_PRECURSOR_METABOLITES_AND_ENERGY	GOBP_GENERATION_OF_PRECURSOR_METABOLITES_AND_ENERGY		353	0.436051	1.92381	0	0.00171772	0.445	2787	tags=42%, list=21%, signal=51%
GOBP_TRNA_WOBBLE_BASE_MODIFICATION	GOBP_TRNA_WOBBLE_BASE_MODIFICATION		17	0.743659	1.92277	0.00206186	0.00174575	0.453	1315	tags=59%, list=10%, signal=65%
GOMF_NADH_DEHYDROGENASE_ACTIVITY	GOMF_NADH_DEHYDROGENASE_ACTIVITY		17	0.73058	1.9217	0.00206186	0.00177908	0.46	2048	tags=82%, list=15%, signal=97%
GOMF_4_IRON_4_SULFUR_CLUSTER_BINDING	GOMF_4_IRON_4_SULFUR_CLUSTER_BINDING		37	0.606353	1.91935	0	0.00183521	0.474	3108	tags=59%, list=23%, signal=77%
GOCC_CHAPERONE_COMPLEX	GOCC_CHAPERONE_COMPLEX		30	0.630377	1.91592	0	0.00189386	0.489	2569	tags=60%, list=19%, signal=74%
GOMF_RNA_POLYMERASE_II_GENERAL_TRANSCRIPTION_INITIATION_FACTOR_ACTIVITY	GOMF_RNA_POLYMERASE_II_GENERAL_TRANSCRIPTION_INITIATION_FACTOR_ACTIVITY		31	0.616937	1.91348	0	0.00197183	0.499	3089	tags=58%, list=23%, signal=75%
GOBP_CYTOCHROME_COMPLEX_ASSEMBLY	GOBP_CYTOCHROME_COMPLEX_ASSEMBLY		26	0.653706	1.91148	0	0.0020128	0.509	1296	tags=42%, list=10%, signal=47%
GOBP_RNA_PHOSPHODIESTER_BOND_HYDROLYSIS_EXONUCLEOLYTIC	GOBP_RNA_PHOSPHODIESTER_BOND_HYDROLYSIS_EXONUCLEOLYTIC		15	0.738002	1.91149	0.0021097	0.00202066	0.509	2120	tags=67%, list=16%, signal=79%
GOBP_PYRIMIDINE_DEOXYRIBONUCLEOTIDE_METABOLIC_PROCESS	GOBP_PYRIMIDINE_DEOXYRIBONUCLEOTIDE_METABOLIC_PROCESS		19	0.695872	1.91102	0	0.0020248	0.512	1363	tags=42%, list=10%, signal=47%
GOBP_ENDONUCLEOLYTIC_CLEAVAGE_INVOLVED_IN_RRNA_PROCESSING	GOBP_ENDONUCLEOLYTIC_CLEAVAGE_INVOLVED_IN_RRNA_PROCESSING		15	0.755129	1.9105	0	0.00203671	0.517	1862	tags=67%, list=14%, signal=77%
GOBP_PROTEIN_LOCALIZATION_TO_CHROMOSOME_TELOMERIC_REGION	GOBP_PROTEIN_LOCALIZATION_TO_CHROMOSOME_TELOMERIC_REGION		30	0.629643	1.9083	0	0.00209033	0.528	1482	tags=40%, list=11%, signal=45%
GOBP_PYRIMIDINE_CONTAINING_COMPOUND_BIOSYNTHETIC_PROCESS	GOBP_PYRIMIDINE_CONTAINING_COMPOUND_BIOSYNTHETIC_PROCESS		27	0.644446	1.90687	0	0.00213239	0.535	3153	tags=56%, list=23%, signal=72%
GOBP_REGULATION_OF_CHROMOSOME_SEGREGATION	GOBP_REGULATION_OF_CHROMOSOME_SEGREGATION		117	0.488001	1.89997	0	0.00236291	0.575	2535	tags=37%, list=19%, signal=45%
GOBP_REGULATION_OF_DNA_REPLICATION	GOBP_REGULATION_OF_DNA_REPLICATION		125	0.484114	1.89529	0	0.00246909	0.588	2689	tags=35%, list=20%, signal=43%
GOMF_SINGLE_STRANDED_DNA_BINDING	GOMF_SINGLE_STRANDED_DNA_BINDING		108	0.493964	1.89562	0	0.00247577	0.588	3250	tags=44%, list=24%, signal=58%
GOBP_ANTIGEN_PROCESSING_AND_PRESENTATION_OF_PEPTIDE_ANTIGEN	GOBP_ANTIGEN_PROCESSING_AND_PRESENTATION_OF_PEPTIDE_ANTIGEN		47	0.564025	1.89247	0	0.00255681	0.599	4218	tags=57%, list=31%, signal=83%
GOCC_DNA_PACKAGING_COMPLEX	GOCC_DNA_PACKAGING_COMPLEX		71	0.531517	1.89266	0	0.00256102	0.597	2376	tags=39%, list=18%, signal=48%
GOMF_OXIDOREDUCTASE_ACTIVITY_ACTING_ON_THE_ALDEHYDE_OR_OXO_GROUP_OF_DONORS	GOMF_OXIDOREDUCTASE_ACTIVITY_ACTING_ON_THE_ALDEHYDE_OR_OXO_GROUP_OF_DONORS		44	0.564799	1.8916	0	0.00256896	0.599	2591	tags=45%, list=19%, signal=56%
GOBP_NEGATIVE_REGULATION_OF_TELOMERE_MAINTENANCE_VIA_TELOMERASE	GOBP_NEGATIVE_REGULATION_OF_TELOMERE_MAINTENANCE_VIA_TELOMERASE		17	0.722203	1.8912	0.0020202	0.00257837	0.603	1852	tags=47%, list=14%, signal=54%
GOBP_RIBONUCLEOSIDE_MONOPHOSPHATE_BIOSYNTHETIC_PROCESS	GOBP_RIBONUCLEOSIDE_MONOPHOSPHATE_BIOSYNTHETIC_PROCESS		32	0.628683	1.88972	0	0.00264449	0.609	4157	tags=72%, list=31%, signal=103%
GOBP_RNA_SPLICING	GOBP_RNA_SPLICING		375	0.427169	1.88857	0	0.00266421	0.61	2503	tags=34%, list=18%, signal=40%
GOMF_DEOXYRIBONUCLEASE_ACTIVITY	GOMF_DEOXYRIBONUCLEASE_ACTIVITY		53	0.561819	1.88769	0	0.00267321	0.613	4610	tags=55%, list=34%, signal=83%
GOBP_PYRIMIDINE_NUCLEOTIDE_METABOLIC_PROCESS	GOBP_PYRIMIDINE_NUCLEOTIDE_METABOLIC_PROCESS		35	0.613273	1.88695	0	0.00269271	0.62	3153	tags=49%, list=23%, signal=63%
GOBP_PROTEIN_DNA_COMPLEX_SUBUNIT_ORGANIZATION	GOBP_PROTEIN_DNA_COMPLEX_SUBUNIT_ORGANIZATION		170	0.457072	1.88456	0	0.00280807	0.634	2502	tags=38%, list=18%, signal=46%
GOMF_3_5_EXONUCLEASE_ACTIVITY	GOMF_3_5_EXONUCLEASE_ACTIVITY		41	0.578072	1.87952	0	0.0029995	0.66	2827	tags=51%, list=21%, signal=65%
GOCC_REPLICATION_FORK	GOCC_REPLICATION_FORK		65	0.536622	1.87787	0	0.00304911	0.667	3880	tags=57%, list=29%, signal=79%
GOBP_MRNA_PROCESSING	GOBP_MRNA_PROCESSING		412	0.416101	1.87757	0	0.00305387	0.668	2503	tags=33%, list=18%, signal=39%
GOBP_REGULATION_OF_ATTACHMENT_OF_SPINDLE_MICROTUBULES_TO_KINETOCHORE	GOBP_REGULATION_OF_ATTACHMENT_OF_SPINDLE_MICROTUBULES_TO_KINETOCHORE		19	0.691013	1.87299	0.00195695	0.00323703	0.69	2315	tags=68%, list=17%, signal=82%
GOBP_MITOCHONDRIAL_TRANSPORT	GOBP_MITOCHONDRIAL_TRANSPORT		132	0.474899	1.8716	0	0.00329585	0.696	2949	tags=42%, list=22%, signal=54%
GOMF_EXONUCLEASE_ACTIVITY	GOMF_EXONUCLEASE_ACTIVITY		67	0.535946	1.87074	0	0.00331786	0.702	2827	tags=45%, list=21%, signal=56%
GOBP_NUCLEOLAR_LARGE_RRNA_TRANSCRIPTION_BY_RNA_POLYMERASE_I	GOBP_NUCLEOLAR_LARGE_RRNA_TRANSCRIPTION_BY_RNA_POLYMERASE_I		18	0.687885	1.86942	0.00206186	0.00335344	0.709	3177	tags=67%, list=23%, signal=87%
GOCC_TRANSCRIPTION_FACTOR_TFIID_COMPLEX	GOCC_TRANSCRIPTION_FACTOR_TFIID_COMPLEX		30	0.618417	1.86952	0.00206612	0.00336541	0.709	3108	tags=57%, list=23%, signal=73%
GOBP_REGULATION_OF_INTRINSIC_APOPTOTIC_SIGNALING_PATHWAY	GOBP_REGULATION_OF_INTRINSIC_APOPTOTIC_SIGNALING_PATHWAY		145	0.467093	1.8633	0	0.00361196	0.734	3130	tags=36%, list=23%, signal=46%
GOBP_RESPIRATORY_CHAIN_COMPLEX_IV_ASSEMBLY	GOBP_RESPIRATORY_CHAIN_COMPLEX_IV_ASSEMBLY		20	0.685579	1.86233	0.00212314	0.00366592	0.742	3427	tags=75%, list=25%, signal=100%
GOMF_TRANSFERASE_ACTIVITY_TRANSFERRING_ONE_CARBON_GROUPS	GOMF_TRANSFERASE_ACTIVITY_TRANSFERRING_ONE_CARBON_GROUPS		156	0.465587	1.86153	0	0.00368878	0.747	3377	tags=44%, list=25%, signal=58%
GOCC_INTRINSIC_COMPONENT_OF_PEROXISOMAL_MEMBRANE	GOCC_INTRINSIC_COMPONENT_OF_PEROXISOMAL_MEMBRANE		16	0.714408	1.85952	0.00399202	0.00377286	0.762	2684	tags=63%, list=20%, signal=78%
GOMF_LYASE_ACTIVITY	GOMF_LYASE_ACTIVITY		140	0.462817	1.85815	0	0.00377628	0.767	2807	tags=40%, list=21%, signal=50%
GOBP_PURINE_NUCLEOBASE_METABOLIC_PROCESS	GOBP_PURINE_NUCLEOBASE_METABOLIC_PROCESS		19	0.688959	1.85896	0.00215517	0.00377739	0.763	3048	tags=63%, list=22%, signal=81%
GOMF_ANTIOXIDANT_ACTIVITY	GOMF_ANTIOXIDANT_ACTIVITY		50	0.555968	1.85822	0	0.00378944	0.767	2647	tags=44%, list=20%, signal=54%
GOCC_U1_SNRNP	GOCC_U1_SNRNP		17	0.703842	1.85755	0.00207469	0.00379588	0.769	1677	tags=53%, list=12%, signal=60%
GOBP_PYRIMIDINE_NUCLEOSIDE_MONOPHOSPHATE_BIOSYNTHETIC_PROCESS	GOBP_PYRIMIDINE_NUCLEOSIDE_MONOPHOSPHATE_BIOSYNTHETIC_PROCESS		15	0.719795	1.85677	0	0.00382799	0.771	3153	tags=73%, list=23%, signal=95%
GOMF_SNRNA_BINDING	GOMF_SNRNA_BINDING		39	0.583523	1.85478	0	0.00391194	0.778	1729	tags=41%, list=13%, signal=47%
GOMF_THREONINE_TYPE_PEPTIDASE_ACTIVITY	GOMF_THREONINE_TYPE_PEPTIDASE_ACTIVITY		17	0.712193	1.85311	0	0.00397561	0.781	1633	tags=59%, list=12%, signal=67%
GOBP_NUCLEAR_TRANSCRIBED_MRNA_CATABOLIC_PROCESS_EXONUCLEOLYTIC	GOBP_NUCLEAR_TRANSCRIBED_MRNA_CATABOLIC_PROCESS_EXONUCLEOLYTIC		16	0.737193	1.85105	0.0042735	0.00406383	0.79	2381	tags=63%, list=18%, signal=76%
GOBP_CHAPERONE_MEDIATED_PROTEIN_FOLDING	GOBP_CHAPERONE_MEDIATED_PROTEIN_FOLDING		57	0.535499	1.84894	0	0.00416396	0.797	2942	tags=51%, list=22%, signal=65%
GOMF_CARBON_CARBON_LYASE_ACTIVITY	GOMF_CARBON_CARBON_LYASE_ACTIVITY		41	0.561523	1.84786	0	0.00420673	0.8	2626	tags=32%, list=19%, signal=39%
GOMF_ENDODEOXYRIBONUCLEASE_ACTIVITY	GOMF_ENDODEOXYRIBONUCLEASE_ACTIVITY		35	0.605395	1.84522	0	0.00431287	0.809	2883	tags=34%, list=21%, signal=43%
GOMF_TRANSLATION_ELONGATION_FACTOR_ACTIVITY	GOMF_TRANSLATION_ELONGATION_FACTOR_ACTIVITY		16	0.717234	1.84532	0	0.00432257	0.809	1349	tags=56%, list=10%, signal=62%
GOCC_NUCLEAR_REPLICATION_FORK	GOCC_NUCLEAR_REPLICATION_FORK		37	0.577297	1.84274	0	0.00444508	0.821	3880	tags=57%, list=29%, signal=79%
GOMF_2_IRON_2_SULFUR_CLUSTER_BINDING	GOMF_2_IRON_2_SULFUR_CLUSTER_BINDING		19	0.672993	1.84011	0.0021978	0.0045956	0.833	3140	tags=63%, list=23%, signal=82%
GOCC_REPLISOME	GOCC_REPLISOME		22	0.646731	1.83922	0.00215517	0.00461414	0.835	3250	tags=55%, list=24%, signal=72%
GOBP_NADPH_REGENERATION	GOBP_NADPH_REGENERATION		20	0.67363	1.83804	0	0.00466407	0.84	1575	tags=50%, list=12%, signal=56%
GOBP_RNA_SPLICING_VIA_TRANSESTERIFICATION_REACTIONS	GOBP_RNA_SPLICING_VIA_TRANSESTERIFICATION_REACTIONS		249	0.432136	1.83578	0	0.00478363	0.85	2503	tags=36%, list=18%, signal=44%
GOCC_U12_TYPE_SPLICEOSOMAL_COMPLEX	GOCC_U12_TYPE_SPLICEOSOMAL_COMPLEX		26	0.635023	1.83443	0	0.00479397	0.855	722	tags=38%, list=5%, signal=41%
GOMF_CATALYTIC_ACTIVITY_ACTING_ON_A_RRNA	GOMF_CATALYTIC_ACTIVITY_ACTING_ON_A_RRNA		17	0.685009	1.83464	0.0021322	0.00480019	0.855	2205	tags=59%, list=16%, signal=70%
GOBP_PYRIMIDINE_NUCLEOSIDE_MONOPHOSPHATE_METABOLIC_PROCESS	GOBP_PYRIMIDINE_NUCLEOSIDE_MONOPHOSPHATE_METABOLIC_PROCESS		20	0.672958	1.83498	0.00413223	0.00480152	0.853	3153	tags=60%, list=23%, signal=78%
GOBP_PTERIDINE_CONTAINING_COMPOUND_METABOLIC_PROCESS	GOBP_PTERIDINE_CONTAINING_COMPOUND_METABOLIC_PROCESS		29	0.618007	1.83224	0	0.0049514	0.867	3128	tags=62%, list=23%, signal=80%
GOBP_NUCLEOBASE_BIOSYNTHETIC_PROCESS	GOBP_NUCLEOBASE_BIOSYNTHETIC_PROCESS		17	0.696876	1.83036	0.00628931	0.00505133	0.876	3153	tags=71%, list=23%, signal=92%
GOCC_NUCLEAR_PORE	GOCC_NUCLEAR_PORE		73	0.506029	1.82623	0	0.00527334	0.882	3310	tags=44%, list=24%, signal=58%
GOBP_PURINE_NUCLEOSIDE_MONOPHOSPHATE_BIOSYNTHETIC_PROCESS	GOBP_PURINE_NUCLEOSIDE_MONOPHOSPHATE_BIOSYNTHETIC_PROCESS		24	0.629823	1.82487	0.00208768	0.00535015	0.885	4157	tags=75%, list=31%, signal=108%
GOBP_MITOTIC_NUCLEAR_DIVISION	GOBP_MITOTIC_NUCLEAR_DIVISION		273	0.424863	1.82435	0	0.00536568	0.889	2332	tags=33%, list=17%, signal=39%
GOMF_HELICASE_ACTIVITY	GOMF_HELICASE_ACTIVITY		136	0.459783	1.82145	0	0.00557278	0.902	3158	tags=43%, list=23%, signal=55%
GOBP_NEGATIVE_REGULATION_OF_INNATE_IMMUNE_RESPONSE	GOBP_NEGATIVE_REGULATION_OF_INNATE_IMMUNE_RESPONSE		57	0.521605	1.81951	0.00215517	0.00570711	0.907	1819	tags=21%, list=13%, signal=24%
GOBP_CELL_CYCLE_CHECKPOINT_SIGNALING	GOBP_CELL_CYCLE_CHECKPOINT_SIGNALING		167	0.441535	1.8166	0	0.00589557	0.915	3357	tags=45%, list=25%, signal=59%
GOBP_LATE_ENDOSOME_TO_VACUOLE_TRANSPORT	GOBP_LATE_ENDOSOME_TO_VACUOLE_TRANSPORT		26	0.625897	1.81251	0	0.00613168	0.921	1718	tags=38%, list=13%, signal=44%
GOMF_OXIDOREDUCTASE_ACTIVITY_ACTING_ON_THE_CH_CH_GROUP_OF_DONORS	GOMF_OXIDOREDUCTASE_ACTIVITY_ACTING_ON_THE_CH_CH_GROUP_OF_DONORS		55	0.51873	1.807	0	0.00650938	0.932	3153	tags=47%, list=23%, signal=61%
GOBP_ORGANIC_ACID_CATABOLIC_PROCESS	GOBP_ORGANIC_ACID_CATABOLIC_PROCESS		178	0.442732	1.80637	0	0.0065278	0.932	3655	tags=47%, list=27%, signal=63%
GOBP_CRISTAE_FORMATION	GOBP_CRISTAE_FORMATION		15	0.700556	1.80362	0.00420168	0.0066813	0.941	2665	tags=60%, list=20%, signal=75%
GOBP_GLYCOSYL_COMPOUND_METABOLIC_PROCESS	GOBP_GLYCOSYL_COMPOUND_METABOLIC_PROCESS		61	0.51111	1.80332	0	0.00669014	0.941	2617	tags=39%, list=19%, signal=49%
GOBP_GMP_METABOLIC_PROCESS	GOBP_GMP_METABOLIC_PROCESS		20	0.654373	1.80289	0	0.00670307	0.943	3034	tags=65%, list=22%, signal=84%
GOBP_POSITIVE_REGULATION_OF_TRANSLATION	GOBP_POSITIVE_REGULATION_OF_TRANSLATION		118	0.457598	1.80165	0	0.00677947	0.946	1977	tags=26%, list=15%, signal=30%
GOBP_GLYCOSYL_COMPOUND_CATABOLIC_PROCESS	GOBP_GLYCOSYL_COMPOUND_CATABOLIC_PROCESS		24	0.641496	1.80137	0	0.0067877	0.946	2303	tags=50%, list=17%, signal=60%
GOBP_DNA_REPAIR	GOBP_DNA_REPAIR		485	0.39849	1.79974	0	0.0068934	0.95	3397	tags=39%, list=25%, signal=51%
GOMF_S_ADENOSYLMETHIONINE_DEPENDENT_METHYLTRANSFERASE_ACTIVITY	GOMF_S_ADENOSYLMETHIONINE_DEPENDENT_METHYLTRANSFERASE_ACTIVITY		110	0.462803	1.79897	0	0.00693493	0.952	2469	tags=38%, list=18%, signal=46%
GOBP_RIBONUCLEOSIDE_MONOPHOSPHATE_METABOLIC_PROCESS	GOBP_RIBONUCLEOSIDE_MONOPHOSPHATE_METABOLIC_PROCESS		45	0.545225	1.7954	0.00215054	0.00719626	0.959	3153	tags=49%, list=23%, signal=63%
GOMF_CATALYTIC_ACTIVITY_ACTING_ON_DNA	GOMF_CATALYTIC_ACTIVITY_ACTING_ON_DNA		200	0.43681	1.79288	0	0.00740711	0.962	2911	tags=40%, list=21%, signal=50%
GOMF_ISOMERASE_ACTIVITY	GOMF_ISOMERASE_ACTIVITY		136	0.447305	1.78886	0	0.00777504	0.965	2986	tags=41%, list=22%, signal=52%
GOMF_NAD_BINDING	GOMF_NAD_BINDING		56	0.51931	1.78817	0	0.00779182	0.966	4016	tags=59%, list=30%, signal=83%
GOBP_PHOSPHATIDYLGLYCEROL_METABOLIC_PROCESS	GOBP_PHOSPHATIDYLGLYCEROL_METABOLIC_PROCESS		21	0.636102	1.78829	0.0021692	0.00780684	0.966	1179	tags=33%, list=9%, signal=36%
GOCC_INO80_TYPE_COMPLEX	GOCC_INO80_TYPE_COMPLEX		26	0.616155	1.78599	0.00638298	0.00796029	0.968	2515	tags=50%, list=19%, signal=61%
GOMF_CARBON_OXYGEN_LYASE_ACTIVITY	GOMF_CARBON_OXYGEN_LYASE_ACTIVITY		57	0.514692	1.78419	0	0.00814555	0.969	2807	tags=42%, list=21%, signal=53%
GOBP_HOMOLOGOUS_RECOMBINATION	GOBP_HOMOLOGOUS_RECOMBINATION		36	0.571074	1.78338	0	0.0081717	0.97	4635	tags=69%, list=34%, signal=105%
GOBP_TRNA_METHYLATION	GOBP_TRNA_METHYLATION		33	0.567339	1.78119	0	0.00837428	0.975	2447	tags=42%, list=18%, signal=52%
GOBP_GPI_ANCHOR_METABOLIC_PROCESS	GOBP_GPI_ANCHOR_METABOLIC_PROCESS		31	0.577154	1.78069	0.00424628	0.00838631	0.975	3172	tags=52%, list=23%, signal=67%
GOBP_CELLULAR_METABOLIC_COMPOUND_SALVAGE	GOBP_CELLULAR_METABOLIC_COMPOUND_SALVAGE		29	0.577755	1.78022	0.00422833	0.00840484	0.975	2825	tags=48%, list=21%, signal=61%
GOBP_REGULATION_OF_NUCLEASE_ACTIVITY	GOBP_REGULATION_OF_NUCLEASE_ACTIVITY		22	0.631801	1.77775	0.00200803	0.00864257	0.979	3178	tags=50%, list=23%, signal=65%
GOBP_SPERM_EGG_RECOGNITION	GOBP_SPERM_EGG_RECOGNITION		22	0.632304	1.7775	0.00220751	0.00864704	0.979	1032	tags=36%, list=8%, signal=39%
GOBP_CHROMOSOME_CONDENSATION	GOBP_CHROMOSOME_CONDENSATION		29	0.592735	1.77719	0.0060241	0.00864731	0.979	1683	tags=38%, list=12%, signal=43%
GOBP_RRNA_METHYLATION	GOBP_RRNA_METHYLATION		17	0.662197	1.77531	0.00607287	0.00881714	0.981	3377	tags=71%, list=25%, signal=94%
GOMF_GLUTATHIONE_PEROXIDASE_ACTIVITY	GOMF_GLUTATHIONE_PEROXIDASE_ACTIVITY		21	0.638643	1.77407	0.00206186	0.00889571	0.982	2647	tags=48%, list=20%, signal=59%
GOBP_DNA_UNWINDING_INVOLVED_IN_DNA_REPLICATION	GOBP_DNA_UNWINDING_INVOLVED_IN_DNA_REPLICATION		20	0.652024	1.77425	0.00430108	0.00890473	0.982	2345	tags=50%, list=17%, signal=60%
GOBP_RESPONSE_TO_INTERFERON_BETA	GOBP_RESPONSE_TO_INTERFERON_BETA		41	0.553695	1.77337	0.00441501	0.00894633	0.982	3482	tags=44%, list=26%, signal=59%
GOBP_PROTEIN_DNA_COMPLEX_ASSEMBLY	GOBP_PROTEIN_DNA_COMPLEX_ASSEMBLY		140	0.445235	1.76944	0	0.00930069	0.984	2502	tags=36%, list=18%, signal=44%
GOBP_RECOMBINATIONAL_REPAIR	GOBP_RECOMBINATIONAL_REPAIR		138	0.450726	1.76949	0	0.00931703	0.984	3250	tags=41%, list=24%, signal=54%
GOBP_DE_NOVO_PROTEIN_FOLDING	GOBP_DE_NOVO_PROTEIN_FOLDING		34	0.57604	1.76863	0.002079	0.00937498	0.984	2859	tags=50%, list=21%, signal=63%
GOBP_NUCLEOBASE_CONTAINING_SMALL_MOLECULE_METABOLIC_PROCESS	GOBP_NUCLEOBASE_CONTAINING_SMALL_MOLECULE_METABOLIC_PROCESS		485	0.388266	1.76789	0	0.00943616	0.988	3153	tags=39%, list=23%, signal=49%
GOBP_NEGATIVE_REGULATION_OF_PROTEIN_MODIFICATION_BY_SMALL_PROTEIN_CONJUGATION_OR_REMOVAL	GOBP_NEGATIVE_REGULATION_OF_PROTEIN_MODIFICATION_BY_SMALL_PROTEIN_CONJUGATION_OR_REMOVAL		83	0.477757	1.7672	0	0.00947412	0.988	1457	tags=28%, list=11%, signal=31%
GOMF_EXONUCLEASE_ACTIVITY_ACTIVE_WITH_EITHER_RIBO_OR_DEOXYRIBONUCLEIC_ACIDS_AND_PRODUCING_5_PHOSPHOMONOESTERS	GOMF_EXONUCLEASE_ACTIVITY_ACTIVE_WITH_EITHER_RIBO_OR_DEOXYRIBONUCLEIC_ACIDS_AND_PRODUCING_5_PHOSPHOMONOESTERS		47	0.535887	1.76373	0.0021097	0.00982576	0.989	2694	tags=40%, list=20%, signal=50%
GOBP_TRANSCRIPTION_PREINITIATION_COMPLEX_ASSEMBLY	GOBP_TRANSCRIPTION_PREINITIATION_COMPLEX_ASSEMBLY		60	0.502834	1.76142	0.00205339	0.0100728	0.99	2783	tags=42%, list=21%, signal=52%
GOBP_ALPHA_AMINO_ACID_METABOLIC_PROCESS	GOBP_ALPHA_AMINO_ACID_METABOLIC_PROCESS		138	0.441386	1.76051	0	0.0100806	0.991	3128	tags=41%, list=23%, signal=52%
GOBP_NUCLEOSIDE_METABOLIC_PROCESS	GOBP_NUCLEOSIDE_METABOLIC_PROCESS		46	0.538295	1.76066	0	0.010099	0.991	3048	tags=48%, list=22%, signal=61%
GOBP_PURINE_CONTAINING_COMPOUND_SALVAGE	GOBP_PURINE_CONTAINING_COMPOUND_SALVAGE		20	0.641525	1.76088	0	0.0101047	0.991	2825	tags=55%, list=21%, signal=69%
GOBP_PURINE_NUCLEOSIDE_MONOPHOSPHATE_METABOLIC_PROCESS	GOBP_PURINE_NUCLEOSIDE_MONOPHOSPHATE_METABOLIC_PROCESS		35	0.557451	1.75883	0.00452489	0.0101962	0.992	3065	tags=51%, list=23%, signal=66%
GOMF_DNA_REPLICATION_ORIGIN_BINDING	GOMF_DNA_REPLICATION_ORIGIN_BINDING		15	0.684402	1.75888	0.0104384	0.010217	0.992	2911	tags=47%, list=21%, signal=59%
GOBP_RNA_CATABOLIC_PROCESS	GOBP_RNA_CATABOLIC_PROCESS		234	0.416322	1.7582	0	0.0102623	0.993	2496	tags=31%, list=18%, signal=38%
GOBP_CELLULAR_AMINO_ACID_CATABOLIC_PROCESS	GOBP_CELLULAR_AMINO_ACID_CATABOLIC_PROCESS		69	0.4925	1.75467	0	0.0106591	0.993	3644	tags=51%, list=27%, signal=69%
GOBP_GLUCOSE_6_PHOSPHATE_METABOLIC_PROCESS	GOBP_GLUCOSE_6_PHOSPHATE_METABOLIC_PROCESS		24	0.601573	1.75198	0.00204082	0.0109613	0.994	1575	tags=42%, list=12%, signal=47%
GOCC_MLL1_2_COMPLEX	GOCC_MLL1_2_COMPLEX		29	0.586588	1.74852	0.00609756	0.0113523	0.994	2515	tags=48%, list=19%, signal=59%
GOMF_GLUTATHIONE_TRANSFERASE_ACTIVITY	GOMF_GLUTATHIONE_TRANSFERASE_ACTIVITY		25	0.601913	1.74811	0.00603622	0.0113733	0.994	3581	tags=60%, list=26%, signal=81%
GOBP_ANTIGEN_PROCESSING_AND_PRESENTATION_OF_PEPTIDE_ANTIGEN_VIA_MHC_CLASS_I	GOBP_ANTIGEN_PROCESSING_AND_PRESENTATION_OF_PEPTIDE_ANTIGEN_VIA_MHC_CLASS_I		32	0.56747	1.74476	0	0.0117577	0.997	4218	tags=56%, list=31%, signal=81%
GOBP_REGULATION_OF_UBIQUITIN_PROTEIN_LIGASE_ACTIVITY	GOBP_REGULATION_OF_UBIQUITIN_PROTEIN_LIGASE_ACTIVITY		19	0.639538	1.74366	0.00628931	0.0118383	0.997	1227	tags=42%, list=9%, signal=46%
GOBP_ATTACHMENT_OF_MITOTIC_SPINDLE_MICROTUBULES_TO_KINETOCHORE	GOBP_ATTACHMENT_OF_MITOTIC_SPINDLE_MICROTUBULES_TO_KINETOCHORE		18	0.652754	1.73909	0.00429185	0.012412	0.998	2481	tags=56%, list=18%, signal=68%
GOBP_MITOCHONDRIAL_DNA_REPLICATION	GOBP_MITOCHONDRIAL_DNA_REPLICATION		15	0.678853	1.73618	0.00413223	0.0127581	0.998	2827	tags=80%, list=21%, signal=101%
GOBP_COTRANSLATIONAL_PROTEIN_TARGETING_TO_MEMBRANE	GOBP_COTRANSLATIONAL_PROTEIN_TARGETING_TO_MEMBRANE		18	0.650627	1.73579	0.00604839	0.0127691	0.998	2774	tags=56%, list=20%, signal=70%
GOBP_GMP_BIOSYNTHETIC_PROCESS	GOBP_GMP_BIOSYNTHETIC_PROCESS		15	0.688884	1.73358	0	0.0130533	0.998	2417	tags=60%, list=18%, signal=73%
GOBP_REGULATION_OF_DNA_STRAND_ELONGATION	GOBP_REGULATION_OF_DNA_STRAND_ELONGATION		18	0.64202	1.73315	0.00204918	0.0130693	0.998	1780	tags=44%, list=13%, signal=51%
GOBP_NUCLEOSIDE_TRIPHOSPHATE_METABOLIC_PROCESS	GOBP_NUCLEOSIDE_TRIPHOSPHATE_METABOLIC_PROCESS		210	0.411139	1.7323	0	0.0131588	0.998	3256	tags=45%, list=24%, signal=59%
GOBP_PROTEIN_N_LINKED_GLYCOSYLATION	GOBP_PROTEIN_N_LINKED_GLYCOSYLATION		57	0.500762	1.73149	0	0.0132396	0.998	3263	tags=46%, list=24%, signal=60%
GOBP_AMP_BIOSYNTHETIC_PROCESS	GOBP_AMP_BIOSYNTHETIC_PROCESS		15	0.678129	1.72728	0.00401606	0.0138236	0.998	4157	tags=93%, list=31%, signal=134%
GOBP_FOLIC_ACID_CONTAINING_COMPOUND_METABOLIC_PROCESS	GOBP_FOLIC_ACID_CONTAINING_COMPOUND_METABOLIC_PROCESS		24	0.601089	1.72673	0.00594059	0.0138809	0.999	3128	tags=58%, list=23%, signal=76%
GOBP_TRANSCRIPTION_BY_RNA_POLYMERASE_I	GOBP_TRANSCRIPTION_BY_RNA_POLYMERASE_I		51	0.505901	1.72201	0	0.0145524	0.999	2503	tags=37%, list=18%, signal=46%
GOCC_TRICARBOXYLIC_ACID_CYCLE_ENZYME_COMPLEX	GOCC_TRICARBOXYLIC_ACID_CYCLE_ENZYME_COMPLEX		17	0.66119	1.72214	0.00809717	0.014572	0.999	2489	tags=53%, list=18%, signal=65%
GOBP_ANTIGEN_PROCESSING_AND_PRESENTATION_OF_ENDOGENOUS_ANTIGEN	GOBP_ANTIGEN_PROCESSING_AND_PRESENTATION_OF_ENDOGENOUS_ANTIGEN		23	0.594984	1.72048	0.0105708	0.014705	0.999	3476	tags=52%, list=26%, signal=70%
GOBP_CELL_REDOX_HOMEOSTASIS	GOBP_CELL_REDOX_HOMEOSTASIS		26	0.587504	1.72062	0.0043384	0.0147171	0.999	2581	tags=42%, list=19%, signal=52%
GOBP_RESPONSE_TO_X_RAY	GOBP_RESPONSE_TO_X_RAY		25	0.584209	1.71902	0.00628931	0.0149157	0.999	1995	tags=36%, list=15%, signal=42%
GOBP_NEGATIVE_REGULATION_OF_TELOMERE_MAINTENANCE_VIA_TELOMERE_LENGTHENING	GOBP_NEGATIVE_REGULATION_OF_TELOMERE_MAINTENANCE_VIA_TELOMERE_LENGTHENING		23	0.607287	1.71917	0.00877193	0.0149361	0.999	3804	tags=65%, list=28%, signal=90%
GOBP_ANTIMICROBIAL_HUMORAL_RESPONSE	GOBP_ANTIMICROBIAL_HUMORAL_RESPONSE		53	0.489316	1.71771	0	0.0150732	1	1203	tags=15%, list=9%, signal=16%
GOMF_PROTON_TRANSMEMBRANE_TRANSPORTER_ACTIVITY	GOMF_PROTON_TRANSMEMBRANE_TRANSPORTER_ACTIVITY		76	0.468803	1.71481	0	0.0155126	1	1841	tags=36%, list=14%, signal=41%
GOMF_PROTEIN_DISULFIDE_REDUCTASE_ACTIVITY	GOMF_PROTEIN_DISULFIDE_REDUCTASE_ACTIVITY		30	0.579158	1.7139	0.004329	0.0156352	1	2846	tags=47%, list=21%, signal=59%
GOBP_BRANCHED_CHAIN_AMINO_ACID_METABOLIC_PROCESS	GOBP_BRANCHED_CHAIN_AMINO_ACID_METABOLIC_PROCESS		22	0.606761	1.71326	0.00915332	0.0156841	1	2903	tags=50%, list=21%, signal=64%
GOBP_TRANSCRIPTION_INITIATION_AT_RNA_POLYMERASE_II_PROMOTER	GOBP_TRANSCRIPTION_INITIATION_AT_RNA_POLYMERASE_II_PROMOTER		82	0.466259	1.70878	0	0.0164283	1	3089	tags=43%, list=23%, signal=55%
GOBP_POST_TRANSCRIPTIONAL_REGULATION_OF_GENE_EXPRESSION	GOBP_POST_TRANSCRIPTIONAL_REGULATION_OF_GENE_EXPRESSION		408	0.384801	1.70833	0	0.0164576	1	2204	tags=24%, list=16%, signal=28%
GOCC_NUCLEOSOME	GOCC_NUCLEOSOME		36	0.540999	1.70781	0.00773694	0.0165305	1	2376	tags=39%, list=18%, signal=47%
GOBP_DNA_TEMPLATED_TRANSCRIPTION_ELONGATION	GOBP_DNA_TEMPLATED_TRANSCRIPTION_ELONGATION		97	0.447445	1.70739	0	0.0165499	1	2060	tags=28%, list=15%, signal=33%
GOMF_3_5_DNA_HELICASE_ACTIVITY	GOMF_3_5_DNA_HELICASE_ACTIVITY		15	0.657807	1.70341	0.010917	0.0171652	1	1085	tags=33%, list=8%, signal=36%
GOBP_DNA_TEMPLATED_TRANSCRIPTION_INITIATION	GOBP_DNA_TEMPLATED_TRANSCRIPTION_INITIATION		113	0.445019	1.70021	0	0.0177268	1	3089	tags=42%, list=23%, signal=53%
GOBP_REGULATION_OF_CELLULAR_AMIDE_METABOLIC_PROCESS	GOBP_REGULATION_OF_CELLULAR_AMIDE_METABOLIC_PROCESS		360	0.380426	1.69963	0	0.0177885	1	2177	tags=23%, list=16%, signal=27%
GOCC_CAJAL_BODY	GOCC_CAJAL_BODY		32	0.555282	1.69507	0.00403226	0.0185951	1	3143	tags=56%, list=23%, signal=73%
GOBP_NUCLEOSIDE_CATABOLIC_PROCESS	GOBP_NUCLEOSIDE_CATABOLIC_PROCESS		16	0.672151	1.6948	0.0110865	0.018607	1	2240	tags=56%, list=17%, signal=67%
GOBP_INTERFERON_GAMMA_MEDIATED_SIGNALING_PATHWAY	GOBP_INTERFERON_GAMMA_MEDIATED_SIGNALING_PATHWAY		17	0.633276	1.69123	0.013834	0.0192376	1	1797	tags=35%, list=13%, signal=41%
GOCC_ANAPHASE_PROMOTING_COMPLEX	GOCC_ANAPHASE_PROMOTING_COMPLEX		20	0.616747	1.69	0.00842105	0.0194282	1	2830	tags=50%, list=21%, signal=63%
GOBP_2_OXOGLUTARATE_METABOLIC_PROCESS	GOBP_2_OXOGLUTARATE_METABOLIC_PROCESS		15	0.66243	1.68946	0.0102459	0.0195088	1	3037	tags=60%, list=22%, signal=77%
GOBP_ANTIGEN_PROCESSING_AND_PRESENTATION_OF_EXOGENOUS_PEPTIDE_ANTIGEN	GOBP_ANTIGEN_PROCESSING_AND_PRESENTATION_OF_EXOGENOUS_PEPTIDE_ANTIGEN		24	0.593625	1.68825	0.00401606	0.0196595	1	4192	tags=63%, list=31%, signal=90%
GOCC_MICROBODY_LUMEN	GOCC_MICROBODY_LUMEN		24	0.589746	1.68839	0.00628931	0.01968	1	4201	tags=71%, list=31%, signal=102%
GOBP_DEOXYRIBONUCLEOTIDE_BIOSYNTHETIC_PROCESS	GOBP_DEOXYRIBONUCLEOTIDE_BIOSYNTHETIC_PROCESS		18	0.63412	1.68428	0.00610998	0.0203198	1	3151	tags=67%, list=23%, signal=87%
GOBP_NUCLEOTIDE_SUGAR_BIOSYNTHETIC_PROCESS	GOBP_NUCLEOTIDE_SUGAR_BIOSYNTHETIC_PROCESS		15	0.653427	1.68231	0.0212314	0.020656	1	3316	tags=47%, list=24%, signal=62%
GOCC_CHROMOSOME_TELOMERIC_REGION	GOCC_CHROMOSOME_TELOMERIC_REGION		104	0.436108	1.68161	0	0.0207543	1	3250	tags=40%, list=24%, signal=53%
GOBP_REGULATION_OF_DNA_METABOLIC_PROCESS	GOBP_REGULATION_OF_DNA_METABOLIC_PROCESS		466	0.370021	1.68088	0	0.0208795	1	2888	tags=30%, list=21%, signal=37%
GOBP_CELLULAR_NITROGEN_COMPOUND_CATABOLIC_PROCESS	GOBP_CELLULAR_NITROGEN_COMPOUND_CATABOLIC_PROCESS		356	0.380539	1.67928	0	0.0211813	1	2447	tags=29%, list=18%, signal=34%
GOCC_SPINDLE_POLE_CENTROSOME	GOCC_SPINDLE_POLE_CENTROSOME		16	0.649439	1.67906	0.0149893	0.0211937	1	2408	tags=56%, list=18%, signal=68%
GOBP_ANTIGEN_PROCESSING_AND_PRESENTATION_OF_EXOGENOUS_ANTIGEN	GOBP_ANTIGEN_PROCESSING_AND_PRESENTATION_OF_EXOGENOUS_ANTIGEN		30	0.557411	1.67421	0	0.0221685	1	4192	tags=57%, list=31%, signal=82%
GOBP_DNA_DOUBLE_STRAND_BREAK_PROCESSING	GOBP_DNA_DOUBLE_STRAND_BREAK_PROCESSING		17	0.623276	1.67364	0.00642398	0.0222308	1	3362	tags=53%, list=25%, signal=70%
GOBP_NUCLEOTIDE_SALVAGE	GOBP_NUCLEOTIDE_SALVAGE		21	0.592793	1.67314	0.00443459	0.0222891	1	2825	tags=48%, list=21%, signal=60%
GOBP_POSITIVE_REGULATION_OF_TRANSCRIPTION_BY_RNA_POLYMERASE_I	GOBP_POSITIVE_REGULATION_OF_TRANSCRIPTION_BY_RNA_POLYMERASE_I		29	0.569565	1.67243	0.00438597	0.0224158	1	1547	tags=28%, list=11%, signal=31%
GOBP_POSITIVE_REGULATION_OF_INTRINSIC_APOPTOTIC_SIGNALING_PATHWAY	GOBP_POSITIVE_REGULATION_OF_INTRINSIC_APOPTOTIC_SIGNALING_PATHWAY		57	0.479846	1.66923	0.006	0.0231011	1	3083	tags=35%, list=23%, signal=45%
GOBP_MRNA_EXPORT_FROM_NUCLEUS	GOBP_MRNA_EXPORT_FROM_NUCLEUS		53	0.490356	1.66853	0.00421053	0.0231842	1	2781	tags=42%, list=20%, signal=52%
GOBP_CELL_CELL_RECOGNITION	GOBP_CELL_CELL_RECOGNITION		34	0.534349	1.66806	0.0122951	0.0232255	1	1032	tags=24%, list=8%, signal=25%
GOBP_ALPHA_AMINO_ACID_CATABOLIC_PROCESS	GOBP_ALPHA_AMINO_ACID_CATABOLIC_PROCESS		58	0.489154	1.66744	0.00669643	0.0232972	1	3243	tags=45%, list=24%, signal=59%
GOMF_PROTEIN_CARRIER_CHAPERONE	GOMF_PROTEIN_CARRIER_CHAPERONE		17	0.615101	1.66681	0.012959	0.0233184	1	1844	tags=29%, list=14%, signal=34%
GOMF_PHOSPHOTRANSFERASE_ACTIVITY_FOR_OTHER_SUBSTITUTED_PHOSPHATE_GROUPS	GOMF_PHOSPHOTRANSFERASE_ACTIVITY_FOR_OTHER_SUBSTITUTED_PHOSPHATE_GROUPS		20	0.616213	1.66659	0.010395	0.02332	1	2141	tags=40%, list=16%, signal=47%
GOBP_ANTIMICROBIAL_HUMORAL_IMMUNE_RESPONSE_MEDIATED_BY_ANTIMICROBIAL_PEPTIDE	GOBP_ANTIMICROBIAL_HUMORAL_IMMUNE_RESPONSE_MEDIATED_BY_ANTIMICROBIAL_PEPTIDE		42	0.512001	1.66701	0.00421053	0.0233223	1	2433	tags=26%, list=18%, signal=32%
GOBP_IMP_METABOLIC_PROCESS	GOBP_IMP_METABOLIC_PROCESS		19	0.617277	1.66607	0.0148936	0.0233817	1	3034	tags=58%, list=22%, signal=74%
GOMF_C_ACYLTRANSFERASE_ACTIVITY	GOMF_C_ACYLTRANSFERASE_ACTIVITY		15	0.655473	1.66324	0.0200803	0.023953	1	4001	tags=60%, list=29%, signal=85%
GOBP_LYSOSOMAL_MEMBRANE_ORGANIZATION	GOBP_LYSOSOMAL_MEMBRANE_ORGANIZATION		17	0.628227	1.66221	0.0124481	0.0241343	1	4086	tags=59%, list=30%, signal=84%
GOBP_BRANCHED_CHAIN_AMINO_ACID_CATABOLIC_PROCESS	GOBP_BRANCHED_CHAIN_AMINO_ACID_CATABOLIC_PROCESS		20	0.61011	1.66112	0.0177515	0.0242333	1	2903	tags=50%, list=21%, signal=64%
GOBP_CYTOKINETIC_PROCESS	GOBP_CYTOKINETIC_PROCESS		37	0.537758	1.66128	0.0042735	0.0242427	1	3399	tags=46%, list=25%, signal=61%
GOBP_DNA_TEMPLATED_DNA_REPLICATION_MAINTENANCE_OF_FIDELITY	GOBP_DNA_TEMPLATED_DNA_REPLICATION_MAINTENANCE_OF_FIDELITY		45	0.508846	1.66071	0.00220751	0.024266	1	4736	tags=67%, list=35%, signal=102%
GOBP_PYRIMIDINE_NUCLEOSIDE_TRIPHOSPHATE_METABOLIC_PROCESS	GOBP_PYRIMIDINE_NUCLEOSIDE_TRIPHOSPHATE_METABOLIC_PROCESS		18	0.623716	1.66135	0.0102881	0.0242819	1	3129	tags=50%, list=23%, signal=65%
GOMF_DNA_HELICASE_ACTIVITY	GOMF_DNA_HELICASE_ACTIVITY		66	0.4618	1.65853	0.00421053	0.0246632	1	2736	tags=45%, list=20%, signal=57%
GOBP_CENTROMERE_COMPLEX_ASSEMBLY	GOBP_CENTROMERE_COMPLEX_ASSEMBLY		28	0.560805	1.65875	0.0151844	0.0246804	1	4137	tags=64%, list=30%, signal=92%
GOBP_HEME_METABOLIC_PROCESS	GOBP_HEME_METABOLIC_PROCESS		33	0.537681	1.65763	0.0151515	0.0248096	1	3047	tags=42%, list=22%, signal=55%
GOBP_TETRAHYDROFOLATE_METABOLIC_PROCESS	GOBP_TETRAHYDROFOLATE_METABOLIC_PROCESS		19	0.606374	1.65646	0.0120482	0.0250394	1	2754	tags=58%, list=20%, signal=73%
GOBP_MIDBODY_ABSCISSION	GOBP_MIDBODY_ABSCISSION		15	0.649346	1.65357	0.0142566	0.0256774	1	4086	tags=67%, list=30%, signal=95%
GOCC_MHC_PROTEIN_COMPLEX	GOCC_MHC_PROTEIN_COMPLEX		17	0.620878	1.65216	0.00860215	0.0259239	1	4170	tags=82%, list=31%, signal=119%
GOBP_POSITIVE_REGULATION_OF_DNA_METABOLIC_PROCESS	GOBP_POSITIVE_REGULATION_OF_DNA_METABOLIC_PROCESS		287	0.380839	1.65177	0	0.0259399	1	2838	tags=30%, list=21%, signal=37%
GOBP_REGULATION_OF_MITOTIC_NUCLEAR_DIVISION	GOBP_REGULATION_OF_MITOTIC_NUCLEAR_DIVISION		104	0.433489	1.64947	0.0045977	0.0263986	1	1921	tags=28%, list=14%, signal=32%
GOCC_ESCRT_COMPLEX	GOCC_ESCRT_COMPLEX		25	0.573657	1.64961	0.0137795	0.0264179	1	1718	tags=36%, list=13%, signal=41%
GOBP_MEIOTIC_CHROMOSOME_SEPARATION	GOBP_MEIOTIC_CHROMOSOME_SEPARATION		18	0.62371	1.64901	0.0191489	0.0264456	1	3378	tags=56%, list=25%, signal=74%
GOBP_MITOCHONDRIAL_MEMBRANE_ORGANIZATION	GOBP_MITOCHONDRIAL_MEMBRANE_ORGANIZATION		93	0.443333	1.64856	0.00424628	0.0264992	1	3646	tags=49%, list=27%, signal=67%
GOBP_PYRIMIDINE_RIBONUCLEOTIDE_METABOLIC_PROCESS	GOBP_PYRIMIDINE_RIBONUCLEOTIDE_METABOLIC_PROCESS		24	0.574124	1.64728	0.0108225	0.0267022	1	3153	tags=46%, list=23%, signal=60%
GOCC_MICROBODY_MEMBRANE	GOCC_MICROBODY_MEMBRANE		42	0.507169	1.6474	0.00430108	0.0267408	1	2684	tags=38%, list=20%, signal=47%
GOBP_PYRIMIDINE_RIBONUCLEOTIDE_BIOSYNTHETIC_PROCESS	GOBP_PYRIMIDINE_RIBONUCLEOTIDE_BIOSYNTHETIC_PROCESS		17	0.639556	1.64478	0.00608519	0.0273032	1	3153	tags=59%, list=23%, signal=77%
GOBP_NUCLEAR_MEMBRANE_REASSEMBLY	GOBP_NUCLEAR_MEMBRANE_REASSEMBLY		18	0.620094	1.64443	0.0231579	0.0273104	1	1676	tags=39%, list=12%, signal=44%
GOBP_DEOXYRIBONUCLEOTIDE_CATABOLIC_PROCESS	GOBP_DEOXYRIBONUCLEOTIDE_CATABOLIC_PROCESS		19	0.603368	1.64316	0.0204499	0.0275878	1	2240	tags=42%, list=17%, signal=50%
GOBP_POSITIVE_REGULATION_OF_CHROMOSOME_SEGREGATION	GOBP_POSITIVE_REGULATION_OF_CHROMOSOME_SEGREGATION		29	0.540664	1.64164	0.00641026	0.0278897	1	2481	tags=38%, list=18%, signal=46%
GOBP_POSITIVE_REGULATION_OF_CELLULAR_AMIDE_METABOLIC_PROCESS	GOBP_POSITIVE_REGULATION_OF_CELLULAR_AMIDE_METABOLIC_PROCESS		140	0.408783	1.63969	0	0.0283465	1	1977	tags=22%, list=15%, signal=26%
GOBP_POSITIVE_REGULATION_OF_TELOMERE_MAINTENANCE_IN_RESPONSE_TO_DNA_DAMAGE	GOBP_POSITIVE_REGULATION_OF_TELOMERE_MAINTENANCE_IN_RESPONSE_TO_DNA_DAMAGE		15	0.635328	1.63934	0.0233546	0.0283749	1	1780	tags=47%, list=13%, signal=54%
GOBP_REGULATION_OF_DNA_TEMPLATED_TRANSCRIPTION_INITIATION	GOBP_REGULATION_OF_DNA_TEMPLATED_TRANSCRIPTION_INITIATION		75	0.450948	1.63822	0.002079	0.028491	1	2502	tags=35%, list=18%, signal=42%
GOMF_STEROID_DEHYDROGENASE_ACTIVITY	GOMF_STEROID_DEHYDROGENASE_ACTIVITY		31	0.536541	1.63845	0.0125261	0.0285146	1	1674	tags=29%, list=12%, signal=33%
GOBP_MITOCHONDRIAL_FUSION	GOBP_MITOCHONDRIAL_FUSION		25	0.556874	1.63765	0.0127389	0.0285566	1	1944	tags=40%, list=14%, signal=47%
GOMF_ADENYLYLTRANSFERASE_ACTIVITY	GOMF_ADENYLYLTRANSFERASE_ACTIVITY		26	0.5706	1.63735	0.010661	0.0285762	1	1896	tags=27%, list=14%, signal=31%
GOBP_PURINE_NUCLEOTIDE_SALVAGE	GOBP_PURINE_NUCLEOTIDE_SALVAGE		17	0.622189	1.63613	0.0126316	0.0288559	1	2825	tags=53%, list=21%, signal=67%
GOCC_FIBRILLAR_CENTER	GOCC_FIBRILLAR_CENTER		133	0.415829	1.63543	0.00230947	0.0289848	1	2184	tags=32%, list=16%, signal=38%
GOBP_LATE_ENDOSOME_TO_VACUOLE_TRANSPORT_VIA_MULTIVESICULAR_BODY_SORTING_PATHWAY	GOBP_LATE_ENDOSOME_TO_VACUOLE_TRANSPORT_VIA_MULTIVESICULAR_BODY_SORTING_PATHWAY		16	0.644725	1.63019	0.0104822	0.0302996	1	2357	tags=50%, list=17%, signal=60%
GOMF_MRNA_BINDING	GOMF_MRNA_BINDING		275	0.375206	1.62955	0	0.0304047	1	1987	tags=25%, list=15%, signal=29%
GOMF_OLIGOPEPTIDE_BINDING	GOMF_OLIGOPEPTIDE_BINDING		15	0.62972	1.62919	0.0143737	0.0304328	1	3928	tags=73%, list=29%, signal=103%
GOBP_PURINE_CONTAINING_COMPOUND_METABOLIC_PROCESS	GOBP_PURINE_CONTAINING_COMPOUND_METABOLIC_PROCESS		362	0.369147	1.62885	0	0.0304561	1	3139	tags=38%, list=23%, signal=48%
GOBP_VESICLE_TARGETING_ROUGH_ER_TO_CIS_GOLGI	GOBP_VESICLE_TARGETING_ROUGH_ER_TO_CIS_GOLGI		19	0.604906	1.62704	0.0234043	0.0309304	1	2030	tags=42%, list=15%, signal=49%
GOBP_DOUBLE_STRAND_BREAK_REPAIR	GOBP_DOUBLE_STRAND_BREAK_REPAIR		244	0.376807	1.6258	0	0.0312086	1	3378	tags=37%, list=25%, signal=48%
GOBP_ORGANIC_CYCLIC_COMPOUND_CATABOLIC_PROCESS	GOBP_ORGANIC_CYCLIC_COMPOUND_CATABOLIC_PROCESS		381	0.365799	1.62389	0	0.0315695	1	2496	tags=28%, list=18%, signal=33%
GOMF_ALDO_KETO_REDUCTASE_NADP_ACTIVITY	GOMF_ALDO_KETO_REDUCTASE_NADP_ACTIVITY		21	0.576035	1.62407	0.0260304	0.0316025	1	2932	tags=62%, list=22%, signal=79%
GOBP_QUINONE_METABOLIC_PROCESS	GOBP_QUINONE_METABOLIC_PROCESS		28	0.544842	1.6242	0.0259179	0.0316228	1	2753	tags=50%, list=20%, signal=63%
GOMF_RIBOSOMAL_SMALL_SUBUNIT_BINDING	GOMF_RIBOSOMAL_SMALL_SUBUNIT_BINDING		15	0.627712	1.62316	0.0241935	0.0317267	1	3257	tags=60%, list=24%, signal=79%
GOBP_RNA_LOCALIZATION	GOBP_RNA_LOCALIZATION		154	0.404198	1.62011	0	0.0325889	1	2485	tags=32%, list=18%, signal=39%
GOBP_RESPIRATORY_BURST	GOBP_RESPIRATORY_BURST		19	0.610494	1.61874	0.0149254	0.0328513	1	1947	tags=37%, list=14%, signal=43%
GOBP_RNA_EXPORT_FROM_NUCLEUS	GOBP_RNA_EXPORT_FROM_NUCLEUS		68	0.460517	1.61892	0.00421941	0.0328628	1	2781	tags=38%, list=20%, signal=48%
GOBP_DEFENSE_RESPONSE_TO_GRAM_NEGATIVE_BACTERIUM	GOBP_DEFENSE_RESPONSE_TO_GRAM_NEGATIVE_BACTERIUM		43	0.48409	1.61794	0.0063425	0.0330248	1	616	tags=14%, list=5%, signal=15%
GOBP_NUCLEOBASE_CONTAINING_SMALL_MOLECULE_CATABOLIC_PROCESS	GOBP_NUCLEOBASE_CONTAINING_SMALL_MOLECULE_CATABOLIC_PROCESS		19	0.586848	1.61593	0.0181818	0.0334851	1	2240	tags=47%, list=17%, signal=57%
GOBP_REGULATION_OF_TRANSCRIPTION_INITIATION_BY_RNA_POLYMERASE_II	GOBP_REGULATION_OF_TRANSCRIPTION_INITIATION_BY_RNA_POLYMERASE_II		66	0.459202	1.61607	0.00421941	0.0335295	1	2502	tags=36%, list=18%, signal=44%
GOBP_ATP_METABOLIC_PROCESS	GOBP_ATP_METABOLIC_PROCESS		171	0.393978	1.61548	0.00447427	0.0335313	1	3256	tags=45%, list=24%, signal=58%
GOBP_REGULATION_OF_INTRINSIC_APOPTOTIC_SIGNALING_PATHWAY_BY_P53_CLASS_MEDIATOR	GOBP_REGULATION_OF_INTRINSIC_APOPTOTIC_SIGNALING_PATHWAY_BY_P53_CLASS_MEDIATOR		27	0.545601	1.61403	0.0184426	0.0338893	1	557	tags=15%, list=4%, signal=15%
GOBP_NCRNA_TRANSCRIPTION	GOBP_NCRNA_TRANSCRIPTION		49	0.480553	1.6125	0.00632911	0.0342779	1	3177	tags=45%, list=23%, signal=58%
GOCC_CONDENSED_NUCLEAR_CHROMOSOME	GOCC_CONDENSED_NUCLEAR_CHROMOSOME		49	0.482751	1.61076	0.00613497	0.0346156	1	2861	tags=43%, list=21%, signal=54%
GOBP_MULTIVESICULAR_BODY_SORTING_PATHWAY	GOBP_MULTIVESICULAR_BODY_SORTING_PATHWAY		35	0.511524	1.61119	0.0147059	0.034627	1	1718	tags=34%, list=13%, signal=39%
GOCC_PRONUCLEUS	GOCC_PRONUCLEUS		20	0.576467	1.61077	0.0209644	0.0346857	1	2614	tags=45%, list=19%, signal=56%
GOBP_NUCLEAR_TRANSCRIBED_MRNA_CATABOLIC_PROCESS	GOBP_NUCLEAR_TRANSCRIBED_MRNA_CATABOLIC_PROCESS		105	0.418088	1.61019	0.00215054	0.0347192	1	2421	tags=30%, list=18%, signal=36%
GOBP_PEPTIDYL_ARGININE_MODIFICATION	GOBP_PEPTIDYL_ARGININE_MODIFICATION		18	0.603661	1.60923	0.0184426	0.0349751	1	2697	tags=61%, list=20%, signal=76%
GOBP_KINETOCHORE_ORGANIZATION	GOBP_KINETOCHORE_ORGANIZATION		20	0.587045	1.60755	0.0245399	0.0354342	1	2481	tags=40%, list=18%, signal=49%
GOCC_DNA_POLYMERASE_COMPLEX	GOCC_DNA_POLYMERASE_COMPLEX		18	0.602495	1.60623	0.0166667	0.0358289	1	3187	tags=67%, list=23%, signal=87%
GOBP_POSITIVE_REGULATION_OF_DNA_TEMPLATED_TRANSCRIPTION_ELONGATION	GOBP_POSITIVE_REGULATION_OF_DNA_TEMPLATED_TRANSCRIPTION_ELONGATION		61	0.461902	1.6047	0.00668151	0.0362519	1	2001	tags=25%, list=15%, signal=29%
GOBP_REGULATION_OF_UBIQUITIN_PROTEIN_TRANSFERASE_ACTIVITY	GOBP_REGULATION_OF_UBIQUITIN_PROTEIN_TRANSFERASE_ACTIVITY		48	0.475814	1.60356	0.00653595	0.0365438	1	280	tags=19%, list=2%, signal=19%
GOCC_TRAPP_COMPLEX	GOCC_TRAPP_COMPLEX		15	0.633065	1.60298	0.0231092	0.0365792	1	2763	tags=47%, list=20%, signal=59%
GOBP_PROTEIN_K11_LINKED_UBIQUITINATION	GOBP_PROTEIN_K11_LINKED_UBIQUITINATION		25	0.545962	1.60303	0.0150862	0.0366447	1	2830	tags=40%, list=21%, signal=50%
GOBP_REGULATION_OF_TELOMERE_MAINTENANCE_IN_RESPONSE_TO_DNA_DAMAGE	GOBP_REGULATION_OF_TELOMERE_MAINTENANCE_IN_RESPONSE_TO_DNA_DAMAGE		20	0.591052	1.60184	0.0122449	0.0368642	1	3714	tags=60%, list=27%, signal=82%
GOMF_MHC_CLASS_I_PROTEIN_BINDING	GOMF_MHC_CLASS_I_PROTEIN_BINDING		20	0.585056	1.60158	0.0203666	0.0368677	1	4218	tags=70%, list=31%, signal=101%
GOBP_TELOMERE_MAINTENANCE_IN_RESPONSE_TO_DNA_DAMAGE	GOBP_TELOMERE_MAINTENANCE_IN_RESPONSE_TO_DNA_DAMAGE		30	0.53331	1.60026	0.0170576	0.0372599	1	3714	tags=47%, list=27%, signal=64%
GOCC_PROTON_TRANSPORTING_TWO_SECTOR_ATPASE_COMPLEX	GOCC_PROTON_TRANSPORTING_TWO_SECTOR_ATPASE_COMPLEX		33	0.505121	1.59927	0.00622407	0.0374918	1	2061	tags=45%, list=15%, signal=53%
GOBP_POSITIVE_REGULATION_OF_MITOCHONDRION_ORGANIZATION	GOBP_POSITIVE_REGULATION_OF_MITOCHONDRION_ORGANIZATION		67	0.451313	1.59731	0.00422833	0.0380639	1	2563	tags=30%, list=19%, signal=37%
GOBP_NADP_METABOLIC_PROCESS	GOBP_NADP_METABOLIC_PROCESS		42	0.490775	1.59576	0.0147368	0.0384934	1	2699	tags=45%, list=20%, signal=56%
GOBP_REGULATION_OF_DNA_TEMPLATED_TRANSCRIPTION_ELONGATION	GOBP_REGULATION_OF_DNA_TEMPLATED_TRANSCRIPTION_ELONGATION		80	0.435984	1.59552	0	0.0384996	1	2001	tags=26%, list=15%, signal=31%
GOBP_ASPARTATE_FAMILY_AMINO_ACID_METABOLIC_PROCESS	GOBP_ASPARTATE_FAMILY_AMINO_ACID_METABOLIC_PROCESS		28	0.531983	1.59502	0.0146751	0.0385904	1	4131	tags=71%, list=30%, signal=102%
GOBP_BIOLOGICAL_PROCESS_INVOLVED_IN_INTERACTION_WITH_SYMBIONT	GOBP_BIOLOGICAL_PROCESS_INVOLVED_IN_INTERACTION_WITH_SYMBIONT		72	0.442712	1.59425	0.00229358	0.038743	1	3384	tags=38%, list=25%, signal=50%
GOCC_INO80_COMPLEX	GOCC_INO80_COMPLEX		16	0.613456	1.59313	0.0290456	0.0389638	1	1780	tags=44%, list=13%, signal=50%
GOBP_GLUTATHIONE_METABOLIC_PROCESS	GOBP_GLUTATHIONE_METABOLIC_PROCESS		61	0.462086	1.59337	0.00639659	0.0389709	1	3045	tags=46%, list=22%, signal=59%
GOMF_EXODEOXYRIBONUCLEASE_ACTIVITY	GOMF_EXODEOXYRIBONUCLEASE_ACTIVITY		20	0.576897	1.59211	0.0229167	0.0392273	1	4542	tags=65%, list=33%, signal=98%
GOBP_DNA_REPLICATION_CHECKPOINT_SIGNALING	GOBP_DNA_REPLICATION_CHECKPOINT_SIGNALING		15	0.629324	1.58842	0.012474	0.0404448	1	4007	tags=67%, list=30%, signal=94%
GOBP_NEGATIVE_REGULATION_OF_INTRINSIC_APOPTOTIC_SIGNALING_PATHWAY	GOBP_NEGATIVE_REGULATION_OF_INTRINSIC_APOPTOTIC_SIGNALING_PATHWAY		85	0.427817	1.58725	0	0.0407713	1	3130	tags=35%, list=23%, signal=46%
GOBP_HISTONE_H2A_ACETYLATION	GOBP_HISTONE_H2A_ACETYLATION		23	0.56469	1.58671	0.013363	0.0408217	1	2315	tags=43%, list=17%, signal=52%
GOBP_REGULATION_OF_CELLULAR_MACROMOLECULE_BIOSYNTHETIC_PROCESS	GOBP_REGULATION_OF_CELLULAR_MACROMOLECULE_BIOSYNTHETIC_PROCESS		385	0.35696	1.58682	0	0.0408592	1	2177	tags=23%, list=16%, signal=27%
GOBP_LATE_ENDOSOME_TO_LYSOSOME_TRANSPORT	GOBP_LATE_ENDOSOME_TO_LYSOSOME_TRANSPORT		17	0.602022	1.58522	0.0331384	0.0412434	1	4190	tags=47%, list=31%, signal=68%
GOBP_POSITIVE_REGULATION_OF_CELL_CYCLE_PHASE_TRANSITION	GOBP_POSITIVE_REGULATION_OF_CELL_CYCLE_PHASE_TRANSITION		106	0.409339	1.58472	0.00423729	0.0413152	1	2117	tags=27%, list=16%, signal=32%
GOMF_OXIDOREDUCTASE_ACTIVITY_ACTING_ON_PEROXIDE_AS_ACCEPTOR	GOMF_OXIDOREDUCTASE_ACTIVITY_ACTING_ON_PEROXIDE_AS_ACCEPTOR		38	0.504966	1.58407	0.0146138	0.0413539	1	2647	tags=42%, list=20%, signal=52%
GOMF_INTRAMOLECULAR_TRANSFERASE_ACTIVITY	GOMF_INTRAMOLECULAR_TRANSFERASE_ACTIVITY		24	0.552949	1.58421	0.0168421	0.0414041	1	1843	tags=42%, list=14%, signal=48%
GOBP_PROTEIN_PEPTIDYL_PROLYL_ISOMERIZATION	GOBP_PROTEIN_PEPTIDYL_PROLYL_ISOMERIZATION		21	0.568291	1.5833	0.0107296	0.0415384	1	3331	tags=71%, list=25%, signal=95%
GOBP_REGULATION_OF_CELL_CYCLE_CHECKPOINT	GOBP_REGULATION_OF_CELL_CYCLE_CHECKPOINT		45	0.484779	1.58194	0.0142566	0.0418746	1	1956	tags=36%, list=14%, signal=41%
GOBP_SERINE_FAMILY_AMINO_ACID_METABOLIC_PROCESS	GOBP_SERINE_FAMILY_AMINO_ACID_METABOLIC_PROCESS		26	0.550208	1.57881	0.0146138	0.0429531	1	2626	tags=42%, list=19%, signal=52%
GOBP_NUCLEOLUS_ORGANIZATION	GOBP_NUCLEOLUS_ORGANIZATION		16	0.625719	1.5737	0.0331126	0.0447221	1	557	tags=31%, list=4%, signal=33%
GOBP_FEMALE_MEIOTIC_NUCLEAR_DIVISION	GOBP_FEMALE_MEIOTIC_NUCLEAR_DIVISION		26	0.534717	1.57388	0.0197368	0.0447403	1	2034	tags=38%, list=15%, signal=45%
GOBP_POSITIVE_REGULATION_OF_CHROMOSOME_SEPARATION	GOBP_POSITIVE_REGULATION_OF_CHROMOSOME_SEPARATION		27	0.535251	1.57263	0.015534	0.0449202	1	2481	tags=33%, list=18%, signal=41%
GOBP_CELLULAR_AMINO_ACID_BIOSYNTHETIC_PROCESS	GOBP_CELLULAR_AMINO_ACID_BIOSYNTHETIC_PROCESS		50	0.464603	1.57271	0.00402414	0.0449798	1	2685	tags=42%, list=20%, signal=52%
GOCC_MICROBODY	GOCC_MICROBODY		119	0.402939	1.57047	0	0.045757	1	3526	tags=39%, list=26%, signal=53%
GOBP_SPINDLE_ASSEMBLY	GOBP_SPINDLE_ASSEMBLY		102	0.411546	1.56953	0.00209644	0.0459921	1	2910	tags=38%, list=21%, signal=48%
GOMF_TRANSLATION_INITIATION_FACTOR_BINDING	GOMF_TRANSLATION_INITIATION_FACTOR_BINDING		34	0.501634	1.56632	0.0151844	0.0470966	1	842	tags=21%, list=6%, signal=22%
GOBP_MITOCHONDRION_MORPHOGENESIS	GOBP_MITOCHONDRION_MORPHOGENESIS		25	0.534961	1.5658	0.0306122	0.0471853	1	2924	tags=44%, list=22%, signal=56%
GOBP_HEME_BIOSYNTHETIC_PROCESS	GOBP_HEME_BIOSYNTHETIC_PROCESS		26	0.543628	1.56433	0.0143737	0.0476295	1	2786	tags=42%, list=21%, signal=53%
GOBP_REGULATION_OF_MITOTIC_CELL_CYCLE_PHASE_TRANSITION	GOBP_REGULATION_OF_MITOTIC_CELL_CYCLE_PHASE_TRANSITION		300	0.363378	1.56306	0	0.04804	1	2175	tags=27%, list=16%, signal=32%
GOBP_AMP_METABOLIC_PROCESS	GOBP_AMP_METABOLIC_PROCESS		23	0.547093	1.56231	0.0275424	0.0481502	1	4157	tags=70%, list=31%, signal=100%
GOMF_DISULFIDE_OXIDOREDUCTASE_ACTIVITY	GOMF_DISULFIDE_OXIDOREDUCTASE_ACTIVITY		36	0.500741	1.56252	0.0206612	0.0481794	1	2958	tags=42%, list=22%, signal=53%
GOBP_MITOTIC_CYTOKINETIC_PROCESS	GOBP_MITOTIC_CYTOKINETIC_PROCESS		21	0.563916	1.56181	0.0383795	0.0482513	1	2700	tags=43%, list=20%, signal=53%
GOMF_PEPTIDE_ANTIGEN_BINDING	GOMF_PEPTIDE_ANTIGEN_BINDING		19	0.5778	1.56064	0.030888	0.0486577	1	3343	tags=58%, list=25%, signal=77%
GOBP_NEGATIVE_REGULATION_OF_DNA_TEMPLATED_TRANSCRIPTION_ELONGATION	GOBP_NEGATIVE_REGULATION_OF_DNA_TEMPLATED_TRANSCRIPTION_ELONGATION		16	0.591997	1.56045	0.0403226	0.048659	1	1566	tags=38%, list=12%, signal=42%
GOBP_POSITIVE_REGULATION_OF_MITOTIC_CELL_CYCLE_PHASE_TRANSITION	GOBP_POSITIVE_REGULATION_OF_MITOTIC_CELL_CYCLE_PHASE_TRANSITION		88	0.419282	1.55859	0.00210526	0.0492595	1	1891	tags=27%, list=14%, signal=31%
