# Supplementary material for: Supplementation with short-chain fatty acids and a prebiotic improves clinical outcome in Parkinson’s disease: a randomized double-blind prospective study
Source: Sci Rep. 2025 Dec 5;16:315. doi: 10.1038/s41598-025-29692-x (PMC12770440; doi:10.1038/s41598-025-29692-x)
Supplement: Supplementary file 4 — Supplementary Material 4 [file 41598_2025_29692_MOESM4_ESM.xlsx]

## Sheet: corrPD_post_VS_pre_M5 neg
	NAME	GS.br..follow.link.to.MSigDB	GS.DETAILS	SIZE	ES	NES	NOM.p.val	FDR.q.val	FWER.p.val	RANK.AT.MAX	LEADING.EDGE	X
1	GOBP_RESPONSE_TO_INTERFERON_BETA	GOBP_RESPONSE_TO_INTERFERON_BETA	Details ...	41	-0.778876	-2.6751	0	0	0	1563	tags=61%, list=12%, signal=69%
2	GOBP_TRNA_METABOLIC_PROCESS	GOBP_TRNA_METABOLIC_PROCESS	Details ...	157	-0.580161	-2.5071	0	0	0	1888	tags=41%, list=14%, signal=48%
3	GOBP_TRNA_PROCESSING	GOBP_TRNA_PROCESSING	Details ...	109	-0.597641	-2.42546	0	0	0	1852	tags=44%, list=14%, signal=51%
4	GOMF_CATALYTIC_ACTIVITY_ACTING_ON_A_TRNA	GOMF_CATALYTIC_ACTIVITY_ACTING_ON_A_TRNA	Details ...	110	-0.576712	-2.37943	0	0	0	2163	tags=42%, list=16%, signal=49%
5	GOBP_TRNA_MODIFICATION	GOBP_TRNA_MODIFICATION	Details ...	76	-0.602728	-2.33191	0	0	0	1852	tags=47%, list=14%, signal=55%
6	GOCC_ORGANELLAR_RIBOSOME	GOCC_ORGANELLAR_RIBOSOME	Details ...	87	-0.572804	-2.27064	0	0.000105221	0.001	3894	tags=54%, list=29%, signal=75%
7	GOBP_MITOCHONDRIAL_TRANSLATION	GOBP_MITOCHONDRIAL_TRANSLATION	Details ...	123	-0.5432	-2.2341	0	9.01891e-05	0.001	3432	tags=49%, list=25%, signal=65%
8	GOBP_RRNA_MODIFICATION	GOBP_RRNA_MODIFICATION	Details ...	29	-0.698824	-2.22716	0	7.89155e-05	0.001	3390	tags=62%, list=25%, signal=83%
9	GOCC_MITOCHONDRIAL_LARGE_RIBOSOMAL_SUBUNIT	GOCC_MITOCHONDRIAL_LARGE_RIBOSOMAL_SUBUNIT	Details ...	55	-0.611007	-2.20241	0	0.0004011	0.006	3894	tags=64%, list=29%, signal=89%
10	GOBP_MITOCHONDRIAL_GENE_EXPRESSION	GOBP_MITOCHONDRIAL_GENE_EXPRESSION	Details ...	149	-0.508958	-2.19671	0	0.000421122	0.007	2934	tags=42%, list=22%, signal=53%
11	GOBP_DNA_DUPLEX_UNWINDING	GOBP_DNA_DUPLEX_UNWINDING	Details ...	42	-0.629999	-2.14844	0	0.00121627	0.022	2839	tags=60%, list=21%, signal=75%
12	GOMF_ENDONUCLEASE_ACTIVITY_ACTIVE_WITH_EITHER_RIBO_OR_DEOXYRIBONUCLEIC_ACIDS_AND_PRODUCING_5_PHOSPHOMONOESTERS	GOMF_ENDONUCLEASE_ACTIVITY_ACTIVE_WITH_EITHER_RIBO_OR_DEOXYRIBONUCLEIC_ACIDS_AND_PRODUCING_5_PHOSPHOMONOESTERS	Details ...	33	-0.660297	-2.14314	0	0.00126795	0.025	1185	tags=33%, list=9%, signal=36%
13	GOMF_ENDORIBONUCLEASE_ACTIVITY_PRODUCING_5_PHOSPHOMONOESTERS	GOMF_ENDORIBONUCLEASE_ACTIVITY_PRODUCING_5_PHOSPHOMONOESTERS	Details ...	22	-0.714729	-2.13024	0	0.001495	0.032	1185	tags=41%, list=9%, signal=45%
14	GOCC_LARGE_RIBOSOMAL_SUBUNIT	GOCC_LARGE_RIBOSOMAL_SUBUNIT	Details ...	104	-0.515865	-2.11393	0	0.0018679	0.043	4320	tags=54%, list=32%, signal=78%
15	GOBP_RESPONSE_TO_PROTOZOAN	GOBP_RESPONSE_TO_PROTOZOAN	Details ...	31	-0.665075	-2.10793	0	0.00186548	0.046	564	tags=35%, list=4%, signal=37%
16	GOBP_PSEUDOURIDINE_SYNTHESIS	GOBP_PSEUDOURIDINE_SYNTHESIS	Details ...	18	-0.749416	-2.10643	0	0.00178667	0.047	1998	tags=61%, list=15%, signal=72%
17	GOBP_DNA_TEMPLATED_DNA_REPLICATION_MAINTENANCE_OF_FIDELITY	GOBP_DNA_TEMPLATED_DNA_REPLICATION_MAINTENANCE_OF_FIDELITY	Details ...	45	-0.60535	-2.09972	0	0.00204219	0.056	2839	tags=44%, list=21%, signal=56%
18	GOBP_NCRNA_PROCESSING	GOBP_NCRNA_PROCESSING	Details ...	353	-0.442153	-2.08206	0	0.00263397	0.076	1863	tags=30%, list=14%, signal=34%
19	GOBP_DEOXYRIBONUCLEOTIDE_BIOSYNTHETIC_PROCESS	GOBP_DEOXYRIBONUCLEOTIDE_BIOSYNTHETIC_PROCESS	Details ...	18	-0.736445	-2.07004	0	0.00291043	0.088	2449	tags=61%, list=18%, signal=74%
20	GOMF_STRUCTURAL_CONSTITUENT_OF_RIBOSOME	GOMF_STRUCTURAL_CONSTITUENT_OF_RIBOSOME	Details ...	148	-0.481217	-2.05449	0	0.00324519	0.103	4113	tags=44%, list=30%, signal=62%
21	GOBP_RRNA_PROCESSING	GOBP_RRNA_PROCESSING		195	-0.453785	-2.03219	0	0.0046476	0.147	2613	tags=35%, list=19%, signal=43%
22	GOMF_CATALYTIC_ACTIVITY_ACTING_ON_A_NUCLEIC_ACID	GOMF_CATALYTIC_ACTIVITY_ACTING_ON_A_NUCLEIC_ACID		480	-0.412649	-2.02918	0	0.00476472	0.158	2163	tags=32%, list=16%, signal=37%
23	GOMF_CATALYTIC_ACTIVITY_ACTING_ON_RNA	GOMF_CATALYTIC_ACTIVITY_ACTING_ON_RNA		303	-0.448883	-2.02857	0	0.00458425	0.159	2163	tags=33%, list=16%, signal=38%
24	GOBP_RESPONSE_TO_INTERFERON_GAMMA	GOBP_RESPONSE_TO_INTERFERON_GAMMA		106	-0.500161	-2.02529	0	0.00446894	0.161	1313	tags=26%, list=10%, signal=29%
25	GOBP_RIBOSOME_BIOGENESIS	GOBP_RIBOSOME_BIOGENESIS		267	-0.448285	-2.01824	0	0.00474677	0.174	2743	tags=38%, list=20%, signal=46%
26	GOCC_RIBOSOMAL_SUBUNIT	GOCC_RIBOSOMAL_SUBUNIT		173	-0.462614	-2.01287	0	0.00496498	0.191	4113	tags=46%, list=30%, signal=66%
27	GOBP_HOMOLOGOUS_RECOMBINATION	GOBP_HOMOLOGOUS_RECOMBINATION		36	-0.592435	-1.99891	0	0.00605912	0.233	2839	tags=53%, list=21%, signal=67%
28	GOBP_DNA_UNWINDING_INVOLVED_IN_DNA_REPLICATION	GOBP_DNA_UNWINDING_INVOLVED_IN_DNA_REPLICATION		20	-0.675323	-1.99167	0	0.00649415	0.255	2775	tags=65%, list=20%, signal=82%
29	GOMF_OLIGOPEPTIDE_BINDING	GOMF_OLIGOPEPTIDE_BINDING		15	-0.731052	-1.96914	0.00260417	0.00898702	0.339	1720	tags=53%, list=13%, signal=61%
30	GOCC_ENDONUCLEASE_COMPLEX	GOCC_ENDONUCLEASE_COMPLEX		31	-0.602525	-1.95883	0	0.0101975	0.388	1743	tags=45%, list=13%, signal=52%
31	GOMF_TRNA_BINDING	GOMF_TRNA_BINDING		63	-0.517603	-1.94977	0	0.0108443	0.416	3078	tags=49%, list=23%, signal=63%
32	GOBP_DNA_CONFORMATION_CHANGE	GOBP_DNA_CONFORMATION_CHANGE		55	-0.529878	-1.92658	0	0.013986	0.5	2839	tags=51%, list=21%, signal=64%
33	GOBP_TRNA_WOBBLE_BASE_MODIFICATION	GOBP_TRNA_WOBBLE_BASE_MODIFICATION		17	-0.711125	-1.92612	0	0.013746	0.505	3827	tags=88%, list=28%, signal=123%
34	GOBP_CELLULAR_RESPONSE_TO_INTERFERON_GAMMA	GOBP_CELLULAR_RESPONSE_TO_INTERFERON_GAMMA		88	-0.48947	-1.91929	0	0.0146991	0.541	1313	tags=26%, list=10%, signal=29%
35	GOBP_RRNA_METABOLIC_PROCESS	GOBP_RRNA_METABOLIC_PROCESS		225	-0.427655	-1.91852	0	0.0144332	0.545	2743	tags=36%, list=20%, signal=44%
36	GOBP_RNA_MODIFICATION	GOBP_RNA_MODIFICATION		131	-0.453335	-1.90846	0	0.0163675	0.607	2056	tags=39%, list=15%, signal=45%
37	GOBP_NUCLEAR_TRANSCRIBED_MRNA_CATABOLIC_PROCESS_EXONUCLEOLYTIC	GOBP_NUCLEAR_TRANSCRIBED_MRNA_CATABOLIC_PROCESS_EXONUCLEOLYTIC		16	-0.692583	-1.90835	0	0.0159418	0.607	2378	tags=56%, list=18%, signal=68%
38	GOMF_LIGASE_ACTIVITY_FORMING_CARBON_OXYGEN_BONDS	GOMF_LIGASE_ACTIVITY_FORMING_CARBON_OXYGEN_BONDS		39	-0.559203	-1.90731	0	0.0157467	0.612	2163	tags=41%, list=16%, signal=49%
39	GOCC_MITOCHONDRIAL_MATRIX	GOCC_MITOCHONDRIAL_MATRIX		259	-0.414768	-1.90481	0	0.0159628	0.628	4039	tags=47%, list=30%, signal=66%
40	GOBP_TRNA_METHYLATION	GOBP_TRNA_METHYLATION		33	-0.582576	-1.89503	0	0.0174865	0.669	1852	tags=42%, list=14%, signal=49%
41	GOBP_SMALL_REGULATORY_NCRNA_3_END_PROCESSING	GOBP_SMALL_REGULATORY_NCRNA_3_END_PROCESSING		17	-0.70787	-1.89137	0.00236407	0.017828	0.685	2452	tags=53%, list=18%, signal=65%
42	GOMF_MANNOSYLTRANSFERASE_ACTIVITY	GOMF_MANNOSYLTRANSFERASE_ACTIVITY		21	-0.64318	-1.88876	0	0.0180542	0.698	2877	tags=52%, list=21%, signal=66%
43	GOBP_PURINE_NUCLEOSIDE_MONOPHOSPHATE_METABOLIC_PROCESS	GOBP_PURINE_NUCLEOSIDE_MONOPHOSPHATE_METABOLIC_PROCESS		35	-0.561691	-1.88343	0.00625	0.0185103	0.714	1953	tags=34%, list=14%, signal=40%
44	GOBP_PROTEIN_PALMITOYLATION	GOBP_PROTEIN_PALMITOYLATION		27	-0.607351	-1.88285	0	0.0181872	0.716	1648	tags=37%, list=12%, signal=42%
45	GOBP_RRNA_METHYLATION	GOBP_RRNA_METHYLATION		17	-0.672811	-1.88253	0	0.0178509	0.718	3181	tags=53%, list=23%, signal=69%
46	GOMF_CATALYTIC_ACTIVITY_ACTING_ON_A_RRNA	GOMF_CATALYTIC_ACTIVITY_ACTING_ON_A_RRNA		17	-0.679169	-1.88136	0.00260417	0.0176985	0.725	3181	tags=53%, list=23%, signal=69%
47	GOBP_DNA_TEMPLATED_DNA_REPLICATION	GOBP_DNA_TEMPLATED_DNA_REPLICATION		136	-0.443735	-1.87851	0	0.0178645	0.735	2847	tags=41%, list=21%, signal=52%
48	GOMF_ATP_DEPENDENT_ACTIVITY_ACTING_ON_RNA	GOMF_ATP_DEPENDENT_ACTIVITY_ACTING_ON_RNA		64	-0.495312	-1.87607	0	0.0179726	0.747	1424	tags=30%, list=10%, signal=33%
49	GOMF_GLUTATHIONE_TRANSFERASE_ACTIVITY	GOMF_GLUTATHIONE_TRANSFERASE_ACTIVITY		25	-0.594098	-1.86514	0.00550964	0.0199234	0.789	1720	tags=36%, list=13%, signal=41%
50	GOMF_ADENYLYLTRANSFERASE_ACTIVITY	GOMF_ADENYLYLTRANSFERASE_ACTIVITY		26	-0.608296	-1.86163	0.0027933	0.0203619	0.8	2372	tags=38%, list=17%, signal=47%
51	GOMF_4_IRON_4_SULFUR_CLUSTER_BINDING	GOMF_4_IRON_4_SULFUR_CLUSTER_BINDING		37	-0.553854	-1.85622	0	0.0214028	0.817	1686	tags=35%, list=12%, signal=40%
52	GOCC_EXORIBONUCLEASE_COMPLEX	GOCC_EXORIBONUCLEASE_COMPLEX		24	-0.607742	-1.8508	0	0.0223065	0.839	2378	tags=46%, list=18%, signal=55%
53	GOBP_AMINO_ACID_ACTIVATION	GOBP_AMINO_ACID_ACTIVATION		41	-0.555268	-1.8507	0.00292398	0.0219422	0.839	2163	tags=39%, list=16%, signal=46%
54	GOBP_AMP_METABOLIC_PROCESS	GOBP_AMP_METABOLIC_PROCESS		23	-0.612867	-1.84432	0.005291	0.0229514	0.858	606	tags=26%, list=4%, signal=27%
55	GOBP_DEFENSE_RESPONSE_TO_GRAM_POSITIVE_BACTERIUM	GOBP_DEFENSE_RESPONSE_TO_GRAM_POSITIVE_BACTERIUM		69	-0.491284	-1.82866	0.00343643	0.0269646	0.908	1142	tags=19%, list=8%, signal=20%
56	GOBP_PURINE_NUCLEOSIDE_MONOPHOSPHATE_BIOSYNTHETIC_PROCESS	GOBP_PURINE_NUCLEOSIDE_MONOPHOSPHATE_BIOSYNTHETIC_PROCESS		24	-0.600906	-1.82791	0	0.0266789	0.912	749	tags=29%, list=6%, signal=31%
57	GOBP_GMP_BIOSYNTHETIC_PROCESS	GOBP_GMP_BIOSYNTHETIC_PROCESS		15	-0.686143	-1.82732	0.00737101	0.0263926	0.914	346	tags=27%, list=3%, signal=27%
58	GOBP_AMP_BIOSYNTHETIC_PROCESS	GOBP_AMP_BIOSYNTHETIC_PROCESS		15	-0.673616	-1.81431	0	0.0298982	0.941	606	tags=33%, list=4%, signal=35%
59	GOBP_RIBOSOME_ASSEMBLY	GOBP_RIBOSOME_ASSEMBLY		53	-0.503441	-1.80192	0	0.0337886	0.962	2706	tags=42%, list=20%, signal=52%
60	GOMF_3_5_DNA_HELICASE_ACTIVITY	GOMF_3_5_DNA_HELICASE_ACTIVITY		15	-0.663199	-1.79462	0.00516796	0.0360123	0.971	2508	tags=60%, list=18%, signal=74%
61	GOBP_NUCLEOSIDE_MONOPHOSPHATE_METABOLIC_PROCESS	GOBP_NUCLEOSIDE_MONOPHOSPHATE_METABOLIC_PROCESS		57	-0.479199	-1.79252	0	0.0362207	0.974	1970	tags=35%, list=15%, signal=41%
62	GOBP_NEGATIVE_REGULATION_OF_VIRAL_LIFE_CYCLE	GOBP_NEGATIVE_REGULATION_OF_VIRAL_LIFE_CYCLE		29	-0.561423	-1.78357	0	0.0393169	0.983	2512	tags=48%, list=19%, signal=59%
63	GOCC_90S_PRERIBOSOME	GOCC_90S_PRERIBOSOME		27	-0.568554	-1.77757	0.00554017	0.0410738	0.984	3679	tags=67%, list=27%, signal=91%
64	GOMF_METAL_CLUSTER_BINDING	GOMF_METAL_CLUSTER_BINDING		57	-0.47605	-1.77353	0	0.0422113	0.988	3674	tags=46%, list=27%, signal=62%
65	GOCC_MITOCHONDRIAL_PROTEIN_CONTAINING_COMPLEX	GOCC_MITOCHONDRIAL_PROTEIN_CONTAINING_COMPLEX		247	-0.39714	-1.77289	0	0.0417937	0.988	4103	tags=40%, list=30%, signal=56%
66	GOBP_RNA_5_END_PROCESSING	GOBP_RNA_5_END_PROCESSING		18	-0.631092	-1.77224	0.00787402	0.0415338	0.988	720	tags=33%, list=5%, signal=35%
67	GOMF_ENDORIBONUCLEASE_ACTIVITY	GOMF_ENDORIBONUCLEASE_ACTIVITY		48	-0.499114	-1.77213	0.00322581	0.0409321	0.988	1745	tags=35%, list=13%, signal=40%
68	GOBP_GMP_METABOLIC_PROCESS	GOBP_GMP_METABOLIC_PROCESS		20	-0.610239	-1.77193	0	0.0403834	0.988	346	tags=20%, list=3%, signal=20%
69	GOMF_TRNA_METHYLTRANSFERASE_ACTIVITY	GOMF_TRNA_METHYLTRANSFERASE_ACTIVITY		30	-0.55155	-1.76969	0	0.0407016	0.988	2145	tags=43%, list=16%, signal=51%
70	GOBP_RIBOSOMAL_LARGE_SUBUNIT_ASSEMBLY	GOBP_RIBOSOMAL_LARGE_SUBUNIT_ASSEMBLY		22	-0.598695	-1.76494	0.00289017	0.0422122	0.993	835	tags=27%, list=6%, signal=29%
71	GOBP_MITOCHONDRIAL_DNA_REPLICATION	GOBP_MITOCHONDRIAL_DNA_REPLICATION		15	-0.664931	-1.76274	0.0109589	0.0424421	0.993	1916	tags=53%, list=14%, signal=62%
72	GOMF_NUCLEASE_ACTIVITY	GOMF_NUCLEASE_ACTIVITY		158	-0.405382	-1.75846	0	0.0436188	0.995	1750	tags=26%, list=13%, signal=29%
73	GOBP_MATURATION_OF_5_8S_RRNA_FROM_TRICISTRONIC_RRNA_TRANSCRIPT_SSU_RRNA_5_8S_RRNA_LSU_RRNA	GOBP_MATURATION_OF_5_8S_RRNA_FROM_TRICISTRONIC_RRNA_TRANSCRIPT_SSU_RRNA_5_8S_RRNA_LSU_RRNA		24	-0.579236	-1.75132	0	0.0463206	0.997	2378	tags=46%, list=18%, signal=55%
74	GOMF_HELICASE_ACTIVITY	GOMF_HELICASE_ACTIVITY		136	-0.406197	-1.74907	0	0.046628	0.997	1599	tags=28%, list=12%, signal=31%
75	GOMF_INTRAMOLECULAR_TRANSFERASE_ACTIVITY	GOMF_INTRAMOLECULAR_TRANSFERASE_ACTIVITY		24	-0.571832	-1.74366	0.00524934	0.0484449	0.998	1691	tags=38%, list=12%, signal=43%
76	GOMF_CARBOHYDRATE_DERIVATIVE_TRANSMEMBRANE_TRANSPORTER_ACTIVITY	GOMF_CARBOHYDRATE_DERIVATIVE_TRANSMEMBRANE_TRANSPORTER_ACTIVITY		46	-0.503293	-1.74247	0.00687285	0.0483062	0.998	3251	tags=50%, list=24%, signal=66%
77	GOBP_MITOTIC_RECOMBINATION	GOBP_MITOTIC_RECOMBINATION		24	-0.582149	-1.73989	0.0111732	0.048763	0.998	1296	tags=38%, list=10%, signal=41%
78	GOMF_TRANSFERASE_ACTIVITY_TRANSFERRING_ALKYL_OR_ARYL_OTHER_THAN_METHYL_GROUPS	GOMF_TRANSFERASE_ACTIVITY_TRANSFERRING_ALKYL_OR_ARYL_OTHER_THAN_METHYL_GROUPS		56	-0.472191	-1.73979	0.00323625	0.0481695	0.998	2014	tags=36%, list=15%, signal=42%

## Sheet: corrPD_post_VS_pre_M5 pos
	NAME	GS.br..follow.link.to.MSigDB	GS.DETAILS	SIZE	ES	NES	NOM.p.val	FDR.q.val	FWER.p.val	RANK.AT.MAX	LEADING.EDGE	X
1	GOBP_EPITHELIAL_CELL_DEVELOPMENT	GOBP_EPITHELIAL_CELL_DEVELOPMENT	Details ...	195	0.574871	2.21948	0	0	0	2868	tags=39%, list=21%, signal=49%
2	GOBP_REGULATION_OF_CELLULAR_RESPONSE_TO_TRANSFORMING_GROWTH_FACTOR_BETA_STIMULUS	GOBP_REGULATION_OF_CELLULAR_RESPONSE_TO_TRANSFORMING_GROWTH_FACTOR_BETA_STIMULUS	Details ...	123	0.613758	2.21451	0	0	0	2359	tags=46%, list=17%, signal=55%
3	GOBP_REGULATION_OF_TRANSMEMBRANE_RECEPTOR_PROTEIN_SERINE_THREONINE_KINASE_SIGNALING_PATHWAY	GOBP_REGULATION_OF_TRANSMEMBRANE_RECEPTOR_PROTEIN_SERINE_THREONINE_KINASE_SIGNALING_PATHWAY	Details ...	214	0.57253	2.20548	0	0	0	2375	tags=39%, list=18%, signal=47%
4	GOBP_REGULATION_OF_CELL_MIGRATION_INVOLVED_IN_SPROUTING_ANGIOGENESIS	GOBP_REGULATION_OF_CELL_MIGRATION_INVOLVED_IN_SPROUTING_ANGIOGENESIS	Details ...	36	0.716717	2.16497	0	0	0	1185	tags=36%, list=9%, signal=39%
5	GOBP_NEGATIVE_REGULATION_OF_TRANSMEMBRANE_RECEPTOR_PROTEIN_SERINE_THREONINE_KINASE_SIGNALING_PATHWAY	GOBP_NEGATIVE_REGULATION_OF_TRANSMEMBRANE_RECEPTOR_PROTEIN_SERINE_THREONINE_KINASE_SIGNALING_PATHWAY	Details ...	115	0.593186	2.13513	0	0	0	2375	tags=40%, list=18%, signal=48%
6	GOBP_EPITHELIAL_TO_MESENCHYMAL_TRANSITION	GOBP_EPITHELIAL_TO_MESENCHYMAL_TRANSITION	Details ...	137	0.580075	2.12947	0	0	0	2282	tags=38%, list=17%, signal=45%
7	GOBP_RESPONSE_TO_TRANSFORMING_GROWTH_FACTOR_BETA	GOBP_RESPONSE_TO_TRANSFORMING_GROWTH_FACTOR_BETA	Details ...	213	0.545975	2.10641	0	0.000509773	0.003	2525	tags=42%, list=19%, signal=51%
8	GOBP_RAS_PROTEIN_SIGNAL_TRANSDUCTION	GOBP_RAS_PROTEIN_SIGNAL_TRANSDUCTION	Details ...	300	0.525888	2.09275	0	0.00103345	0.007	3137	tags=42%, list=23%, signal=53%
9	GOBP_TRANSFORMING_GROWTH_FACTOR_BETA_RECEPTOR_SIGNALING_PATHWAY	GOBP_TRANSFORMING_GROWTH_FACTOR_BETA_RECEPTOR_SIGNALING_PATHWAY	Details ...	177	0.556821	2.08831	0	0.000918625	0.007	2525	tags=43%, list=19%, signal=52%
10	GOBP_TRANSMEMBRANE_RECEPTOR_PROTEIN_SERINE_THREONINE_KINASE_SIGNALING_PATHWAY	GOBP_TRANSMEMBRANE_RECEPTOR_PROTEIN_SERINE_THREONINE_KINASE_SIGNALING_PATHWAY	Details ...	302	0.523236	2.08679	0	0.000945091	0.008	2440	tags=36%, list=18%, signal=43%
11	GOBP_MESENCHYMAL_CELL_DIFFERENTIATION	GOBP_MESENCHYMAL_CELL_DIFFERENTIATION	Details ...	206	0.540607	2.05405	0	0.00171598	0.016	2486	tags=35%, list=18%, signal=42%
12	GOBP_NEGATIVE_REGULATION_OF_TRANSFORMING_GROWTH_FACTOR_BETA_RECEPTOR_SIGNALING_PATHWAY	GOBP_NEGATIVE_REGULATION_OF_TRANSFORMING_GROWTH_FACTOR_BETA_RECEPTOR_SIGNALING_PATHWAY	Details ...	80	0.599032	2.04983	0	0.00157298	0.016	2187	tags=41%, list=16%, signal=49%
13	GOBP_MUSCLE_CELL_APOPTOTIC_PROCESS	GOBP_MUSCLE_CELL_APOPTOTIC_PROCESS	Details ...	92	0.588482	2.04867	0	0.00163422	0.018	2495	tags=38%, list=18%, signal=46%
14	GOBP_ACTIVIN_RECEPTOR_SIGNALING_PATHWAY	GOBP_ACTIVIN_RECEPTOR_SIGNALING_PATHWAY	Details ...	29	0.727891	2.04681	0	0.00151749	0.018	2058	tags=52%, list=15%, signal=61%
15	GOBP_REGULATION_OF_EPITHELIAL_TO_MESENCHYMAL_TRANSITION	GOBP_REGULATION_OF_EPITHELIAL_TO_MESENCHYMAL_TRANSITION	Details ...	88	0.582801	2.0311	0	0.0019616	0.025	2282	tags=39%, list=17%, signal=46%
16	GOBP_PLATELET_DERIVED_GROWTH_FACTOR_RECEPTOR_SIGNALING_PATHWAY	GOBP_PLATELET_DERIVED_GROWTH_FACTOR_RECEPTOR_SIGNALING_PATHWAY	Details ...	57	0.623839	2.03093	0	0.00191246	0.026	3051	tags=58%, list=22%, signal=74%
17	GOBP_CARDIAC_ATRIUM_DEVELOPMENT	GOBP_CARDIAC_ATRIUM_DEVELOPMENT	Details ...	26	0.714817	2.00839	0	0.00331979	0.048	1306	tags=46%, list=10%, signal=51%
18	GOBP_POSITIVE_REGULATION_OF_TRANSMEMBRANE_RECEPTOR_PROTEIN_SERINE_THREONINE_KINASE_SIGNALING_PATHWAY	GOBP_POSITIVE_REGULATION_OF_TRANSMEMBRANE_RECEPTOR_PROTEIN_SERINE_THREONINE_KINASE_SIGNALING_PATHWAY	Details ...	96	0.567702	2.004	0	0.00339516	0.052	2331	tags=41%, list=17%, signal=49%
19	GOBP_RESPONSE_TO_OSMOTIC_STRESS	GOBP_RESPONSE_TO_OSMOTIC_STRESS	Details ...	66	0.615193	1.99817	0	0.00371173	0.059	1993	tags=38%, list=15%, signal=44%
20	GOBP_REGULATION_OF_CELLULAR_RESPONSE_TO_GROWTH_FACTOR_STIMULUS	GOBP_REGULATION_OF_CELLULAR_RESPONSE_TO_GROWTH_FACTOR_STIMULUS	Details ...	261	0.506625	1.99019	0	0.00452358	0.074	2404	tags=32%, list=18%, signal=38%
21	GOBP_GASTRULATION	GOBP_GASTRULATION		138	0.54307	1.98783	0	0.00458846	0.079	3149	tags=43%, list=23%, signal=56%
22	GOBP_FOREBRAIN_NEURON_DIFFERENTIATION	GOBP_FOREBRAIN_NEURON_DIFFERENTIATION		30	0.682184	1.98418	0	0.00485979	0.087	1903	tags=30%, list=14%, signal=35%
23	GOBP_REGULATION_OF_FIBROBLAST_MIGRATION	GOBP_REGULATION_OF_FIBROBLAST_MIGRATION		42	0.645382	1.97557	0	0.00592399	0.11	3072	tags=52%, list=23%, signal=67%
24	GOBP_ALTERNATIVE_MRNA_SPLICING_VIA_SPLICEOSOME	GOBP_ALTERNATIVE_MRNA_SPLICING_VIA_SPLICEOSOME		74	0.582035	1.97475	0	0.00582248	0.113	2468	tags=39%, list=18%, signal=48%
25	GOBP_MESENCHYME_DEVELOPMENT	GOBP_MESENCHYME_DEVELOPMENT		245	0.508604	1.97237	0	0.0056826	0.115	2486	tags=32%, list=18%, signal=39%
26	GOMF_NUCLEAR_ANDROGEN_RECEPTOR_BINDING	GOMF_NUCLEAR_ANDROGEN_RECEPTOR_BINDING		31	0.67343	1.96816	0	0.006005	0.125	2109	tags=48%, list=16%, signal=57%
27	GOBP_REGULATION_OF_ACTIVIN_RECEPTOR_SIGNALING_PATHWAY	GOBP_REGULATION_OF_ACTIVIN_RECEPTOR_SIGNALING_PATHWAY		20	0.745587	1.96708	0	0.00582616	0.126	2058	tags=55%, list=15%, signal=65%
28	GOBP_HORMONE_MEDIATED_SIGNALING_PATHWAY	GOBP_HORMONE_MEDIATED_SIGNALING_PATHWAY		127	0.541312	1.965	0	0.0057872	0.129	2631	tags=44%, list=19%, signal=54%
29	GOBP_REGULATION_OF_MICROTUBULE_POLYMERIZATION_OR_DEPOLYMERIZATION	GOBP_REGULATION_OF_MICROTUBULE_POLYMERIZATION_OR_DEPOLYMERIZATION		79	0.572318	1.96155	0	0.00611399	0.141	2557	tags=34%, list=19%, signal=42%
30	GOBP_SMALL_GTPASE_MEDIATED_SIGNAL_TRANSDUCTION	GOBP_SMALL_GTPASE_MEDIATED_SIGNAL_TRANSDUCTION		385	0.485217	1.95486	0	0.00653635	0.155	3211	tags=39%, list=24%, signal=50%
31	GOBP_REGULATION_OF_BLOOD_VESSEL_ENDOTHELIAL_CELL_MIGRATION	GOBP_REGULATION_OF_BLOOD_VESSEL_ENDOTHELIAL_CELL_MIGRATION		87	0.565883	1.95433	0	0.00643749	0.158	2991	tags=38%, list=22%, signal=48%
32	GOBP_FIBROBLAST_MIGRATION	GOBP_FIBROBLAST_MIGRATION		61	0.601538	1.95395	0	0.00627286	0.159	3072	tags=49%, list=23%, signal=63%
33	GOBP_STEROID_HORMONE_MEDIATED_SIGNALING_PATHWAY	GOBP_STEROID_HORMONE_MEDIATED_SIGNALING_PATHWAY		99	0.559521	1.95333	0	0.00611801	0.16	2631	tags=45%, list=19%, signal=56%
34	GOBP_POSITIVE_REGULATION_OF_PROTEIN_POLYMERIZATION	GOBP_POSITIVE_REGULATION_OF_PROTEIN_POLYMERIZATION		76	0.585135	1.95107	0	0.00624718	0.169	3211	tags=47%, list=24%, signal=62%
35	GOBP_NEGATIVE_REGULATION_OF_CELL_GROWTH	GOBP_NEGATIVE_REGULATION_OF_CELL_GROWTH		168	0.513805	1.95084	0	0.00613611	0.171	2548	tags=37%, list=19%, signal=45%
36	GOBP_MORPHOGENESIS_OF_AN_EPITHELIAL_SHEET	GOBP_MORPHOGENESIS_OF_AN_EPITHELIAL_SHEET		52	0.598229	1.94257	0	0.00668494	0.183	3439	tags=60%, list=25%, signal=80%
37	GOBP_REGULATION_OF_MAP_KINASE_ACTIVITY	GOBP_REGULATION_OF_MAP_KINASE_ACTIVITY		179	0.513059	1.94223	0	0.00656824	0.185	3408	tags=45%, list=25%, signal=60%
38	GOBP_POSITIVE_REGULATION_OF_STRESS_ACTIVATED_PROTEIN_KINASE_SIGNALING_CASCADE	GOBP_POSITIVE_REGULATION_OF_STRESS_ACTIVATED_PROTEIN_KINASE_SIGNALING_CASCADE		113	0.542573	1.94119	0	0.00661157	0.19	2374	tags=37%, list=17%, signal=45%
39	GOBP_CORTICOSTEROID_RECEPTOR_SIGNALING_PATHWAY	GOBP_CORTICOSTEROID_RECEPTOR_SIGNALING_PATHWAY		16	0.763775	1.94067	0	0.00644204	0.19	1592	tags=56%, list=12%, signal=64%
40	GOMF_SMAD_BINDING	GOMF_SMAD_BINDING		77	0.57021	1.94063	0	0.00628099	0.19	2395	tags=47%, list=18%, signal=56%
41	GOBP_REGULATION_OF_JUN_KINASE_ACTIVITY	GOBP_REGULATION_OF_JUN_KINASE_ACTIVITY		65	0.585946	1.93853	0	0.00655766	0.203	2099	tags=34%, list=15%, signal=40%
42	GOBP_LENS_DEVELOPMENT_IN_CAMERA_TYPE_EYE	GOBP_LENS_DEVELOPMENT_IN_CAMERA_TYPE_EYE		58	0.601298	1.93795	0	0.0064578	0.205	2706	tags=52%, list=20%, signal=64%
43	GOBP_CELL_CELL_SIGNALING_BY_WNT	GOBP_CELL_CELL_SIGNALING_BY_WNT		356	0.481829	1.93592	0	0.00660723	0.211	3012	tags=38%, list=22%, signal=48%
44	GOBP_NEGATIVE_REGULATION_OF_MUSCLE_CELL_APOPTOTIC_PROCESS	GOBP_NEGATIVE_REGULATION_OF_MUSCLE_CELL_APOPTOTIC_PROCESS		58	0.598934	1.93184	0	0.00688296	0.223	2433	tags=38%, list=18%, signal=46%
45	GOBP_STRIATED_MUSCLE_CELL_APOPTOTIC_PROCESS	GOBP_STRIATED_MUSCLE_CELL_APOPTOTIC_PROCESS		60	0.585135	1.9314	0	0.00678271	0.225	2495	tags=37%, list=18%, signal=45%
46	GOBP_ARTERY_MORPHOGENESIS	GOBP_ARTERY_MORPHOGENESIS		64	0.584574	1.92934	0	0.00694155	0.233	2525	tags=42%, list=19%, signal=52%
47	GOBP_MUSCLE_TISSUE_DEVELOPMENT	GOBP_MUSCLE_TISSUE_DEVELOPMENT		349	0.478979	1.92877	0	0.00684365	0.234	2868	tags=38%, list=21%, signal=46%
48	GOBP_POSITIVE_REGULATION_OF_EPITHELIAL_TO_MESENCHYMAL_TRANSITION	GOBP_POSITIVE_REGULATION_OF_EPITHELIAL_TO_MESENCHYMAL_TRANSITION		44	0.628866	1.92662	0	0.00697076	0.243	2814	tags=55%, list=21%, signal=69%
49	GOBP_REGULATION_OF_SMALL_GTPASE_MEDIATED_SIGNAL_TRANSDUCTION	GOBP_REGULATION_OF_SMALL_GTPASE_MEDIATED_SIGNAL_TRANSDUCTION		202	0.505602	1.92515	0	0.00711663	0.255	3137	tags=43%, list=23%, signal=55%
50	GOBP_TUBE_FORMATION	GOBP_TUBE_FORMATION		152	0.511565	1.92501	0	0.0069743	0.255	2487	tags=32%, list=18%, signal=38%
51	GOMF_LIPID_TRANSFER_ACTIVITY	GOMF_LIPID_TRANSFER_ACTIVITY		35	0.650446	1.92026	0	0.00748138	0.278	2479	tags=49%, list=18%, signal=59%
52	GOBP_REGULATION_OF_DNA_TEMPLATED_TRANSCRIPTION_IN_RESPONSE_TO_STRESS	GOBP_REGULATION_OF_DNA_TEMPLATED_TRANSCRIPTION_IN_RESPONSE_TO_STRESS		51	0.60726	1.9172	0	0.00769803	0.29	944	tags=33%, list=7%, signal=36%
53	GOBP_REGULATION_OF_MICROTUBULE_CYTOSKELETON_ORGANIZATION	GOBP_REGULATION_OF_MICROTUBULE_CYTOSKELETON_ORGANIZATION		143	0.522494	1.91418	0	0.00792799	0.304	2365	tags=32%, list=17%, signal=39%
54	GOBP_STRIATED_MUSCLE_TISSUE_DEVELOPMENT	GOBP_STRIATED_MUSCLE_TISSUE_DEVELOPMENT		214	0.500473	1.91384	0	0.00780289	0.305	2866	tags=38%, list=21%, signal=48%
55	GOBP_CARDIAC_CHAMBER_MORPHOGENESIS	GOBP_CARDIAC_CHAMBER_MORPHOGENESIS		112	0.534833	1.9129	0	0.00794045	0.309	2636	tags=38%, list=19%, signal=46%
56	GOBP_EPITHELIAL_CELL_MORPHOGENESIS	GOBP_EPITHELIAL_CELL_MORPHOGENESIS		41	0.632618	1.91289	0.0015528	0.00779866	0.309	2627	tags=39%, list=19%, signal=48%
57	GOBP_RHO_PROTEIN_SIGNAL_TRANSDUCTION	GOBP_RHO_PROTEIN_SIGNAL_TRANSDUCTION		117	0.531089	1.91283	0	0.00766184	0.309	3211	tags=44%, list=24%, signal=57%
58	GOBP_CARDIAC_MUSCLE_CELL_DIFFERENTIATION	GOBP_CARDIAC_MUSCLE_CELL_DIFFERENTIATION		108	0.536188	1.91194	0	0.00773132	0.314	3298	tags=45%, list=24%, signal=59%
59	GOBP_ENDODERM_DEVELOPMENT	GOBP_ENDODERM_DEVELOPMENT		54	0.590897	1.91183	0	0.00760028	0.314	3447	tags=52%, list=25%, signal=69%
60	GOBP_AMEBOIDAL_TYPE_CELL_MIGRATION	GOBP_AMEBOIDAL_TYPE_CELL_MIGRATION		398	0.474784	1.91075	0	0.00762983	0.319	3447	tags=40%, list=25%, signal=52%
61	GOBP_CELL_MIGRATION_INVOLVED_IN_SPROUTING_ANGIOGENESIS	GOBP_CELL_MIGRATION_INVOLVED_IN_SPROUTING_ANGIOGENESIS		50	0.593409	1.90996	0	0.00754351	0.319	1185	tags=26%, list=9%, signal=28%
62	GOBP_EMBRYONIC_MORPHOGENESIS	GOBP_EMBRYONIC_MORPHOGENESIS		491	0.471791	1.90871	0	0.00766701	0.329	3451	tags=39%, list=25%, signal=51%
63	GOBP_STRIATED_MUSCLE_CELL_DIFFERENTIATION	GOBP_STRIATED_MUSCLE_CELL_DIFFERENTIATION		233	0.493129	1.90776	0	0.00763818	0.333	3538	tags=45%, list=26%, signal=59%
64	GOMF_CHROMATIN_DNA_BINDING	GOMF_CHROMATIN_DNA_BINDING		81	0.553323	1.90389	0	0.00801305	0.351	2177	tags=41%, list=16%, signal=48%
65	GOCC_PROTEIN_PHOSPHATASE_TYPE_2A_COMPLEX	GOCC_PROTEIN_PHOSPHATASE_TYPE_2A_COMPLEX		17	0.752303	1.903	0	0.00803409	0.358	2736	tags=65%, list=20%, signal=81%
66	GOBP_FOREBRAIN_NEURON_DEVELOPMENT	GOBP_FOREBRAIN_NEURON_DEVELOPMENT		19	0.730867	1.90018	0	0.00855142	0.38	1753	tags=32%, list=13%, signal=36%
67	GOBP_REGULATION_OF_CIRCADIAN_RHYTHM	GOBP_REGULATION_OF_CIRCADIAN_RHYTHM		100	0.536681	1.89896	0	0.00868709	0.389	2732	tags=39%, list=20%, signal=48%
68	GOBP_ENDOTHELIAL_CELL_DEVELOPMENT	GOBP_ENDOTHELIAL_CELL_DEVELOPMENT		68	0.568415	1.8988	0	0.00861105	0.392	2868	tags=40%, list=21%, signal=50%
69	GOBP_REGULATION_OF_BROWN_FAT_CELL_DIFFERENTIATION	GOBP_REGULATION_OF_BROWN_FAT_CELL_DIFFERENTIATION		23	0.700038	1.89837	0	0.00860552	0.397	1135	tags=39%, list=8%, signal=43%
70	GOMF_PHOSPHATASE_REGULATOR_ACTIVITY	GOMF_PHOSPHATASE_REGULATOR_ACTIVITY		86	0.55866	1.89421	0	0.00918434	0.421	2736	tags=37%, list=20%, signal=46%
71	GOBP_REGULATION_OF_MYOTUBE_DIFFERENTIATION	GOBP_REGULATION_OF_MYOTUBE_DIFFERENTIATION		30	0.66344	1.89416	0	0.00905499	0.421	1980	tags=47%, list=15%, signal=55%
72	GOBP_FOREBRAIN_GENERATION_OF_NEURONS	GOBP_FOREBRAIN_GENERATION_OF_NEURONS		37	0.633229	1.89404	0	0.00894567	0.422	1903	tags=27%, list=14%, signal=31%
73	GOBP_NEGATIVE_REGULATION_OF_GROWTH	GOBP_NEGATIVE_REGULATION_OF_GROWTH		219	0.494388	1.894	0	0.00882313	0.422	2548	tags=35%, list=19%, signal=42%
74	GOBP_REGULATION_OF_BMP_SIGNALING_PATHWAY	GOBP_REGULATION_OF_BMP_SIGNALING_PATHWAY		75	0.553482	1.89388	0	0.0087039	0.422	2058	tags=33%, list=15%, signal=39%
75	GOBP_ESTABLISHMENT_OF_ENDOTHELIAL_BARRIER	GOBP_ESTABLISHMENT_OF_ENDOTHELIAL_BARRIER		49	0.600237	1.89385	0	0.00860328	0.422	2815	tags=41%, list=21%, signal=51%
76	GOCC_MICROTUBULE_END	GOCC_MICROTUBULE_END		31	0.659001	1.89178	0	0.00876638	0.434	888	tags=35%, list=7%, signal=38%
77	GOBP_EMBRYONIC_PLACENTA_MORPHOGENESIS	GOBP_EMBRYONIC_PLACENTA_MORPHOGENESIS		27	0.676157	1.89066	0	0.00875936	0.439	1102	tags=37%, list=8%, signal=40%
78	GOBP_REGULATION_OF_EPITHELIAL_CELL_MIGRATION	GOBP_REGULATION_OF_EPITHELIAL_CELL_MIGRATION		215	0.48975	1.88979	0	0.00876786	0.444	3408	tags=40%, list=25%, signal=53%
79	GOBP_REGULATION_OF_INTRACELLULAR_STEROID_HORMONE_RECEPTOR_SIGNALING_PATHWAY	GOBP_REGULATION_OF_INTRACELLULAR_STEROID_HORMONE_RECEPTOR_SIGNALING_PATHWAY		65	0.562268	1.8885	0	0.008865	0.454	2548	tags=43%, list=19%, signal=53%
80	GOBP_NEUROTROPHIN_SIGNALING_PATHWAY	GOBP_NEUROTROPHIN_SIGNALING_PATHWAY		39	0.631728	1.88808	0	0.00890073	0.458	2724	tags=46%, list=20%, signal=58%
81	GOBP_REGULATION_OF_MRNA_SPLICING_VIA_SPLICEOSOME	GOBP_REGULATION_OF_MRNA_SPLICING_VIA_SPLICEOSOME		99	0.537088	1.88628	0	0.00908015	0.464	3114	tags=44%, list=23%, signal=57%
82	GOBP_REGULATION_OF_STRESS_ACTIVATED_PROTEIN_KINASE_SIGNALING_CASCADE	GOBP_REGULATION_OF_STRESS_ACTIVATED_PROTEIN_KINASE_SIGNALING_CASCADE		177	0.505527	1.88622	0	0.00898384	0.465	2393	tags=33%, list=18%, signal=40%
83	GOBP_NEUROEPITHELIAL_CELL_DIFFERENTIATION	GOBP_NEUROEPITHELIAL_CELL_DIFFERENTIATION		28	0.674814	1.88572	0.00298954	0.00890399	0.467	589	tags=32%, list=4%, signal=34%
84	GOBP_FORMATION_OF_PRIMARY_GERM_LAYER	GOBP_FORMATION_OF_PRIMARY_GERM_LAYER		79	0.544887	1.88532	0	0.00885364	0.467	3451	tags=44%, list=25%, signal=59%
85	GOBP_REGULATION_OF_PROTEIN_KINASE_B_SIGNALING	GOBP_REGULATION_OF_PROTEIN_KINASE_B_SIGNALING		134	0.520593	1.88498	0	0.00879087	0.468	2991	tags=39%, list=22%, signal=49%
86	GOBP_CARDIAC_VENTRICLE_MORPHOGENESIS	GOBP_CARDIAC_VENTRICLE_MORPHOGENESIS		61	0.573344	1.88469	0	0.00872931	0.47	3249	tags=46%, list=24%, signal=60%
87	GOBP_REGULATION_OF_ALTERNATIVE_MRNA_SPLICING_VIA_SPLICEOSOME	GOBP_REGULATION_OF_ALTERNATIVE_MRNA_SPLICING_VIA_SPLICEOSOME		56	0.591753	1.88435	0	0.00865578	0.47	3112	tags=46%, list=23%, signal=60%
88	GOBP_REGULATION_OF_MUSCLE_CELL_DIFFERENTIATION	GOBP_REGULATION_OF_MUSCLE_CELL_DIFFERENTIATION		126	0.521879	1.88401	0	0.00861103	0.47	2588	tags=33%, list=19%, signal=41%
89	GOBP_LENS_MORPHOGENESIS_IN_CAMERA_TYPE_EYE	GOBP_LENS_MORPHOGENESIS_IN_CAMERA_TYPE_EYE		19	0.713481	1.88267	0.003367	0.00864692	0.472	2376	tags=47%, list=18%, signal=57%
90	GOBP_CANONICAL_WNT_SIGNALING_PATHWAY	GOBP_CANONICAL_WNT_SIGNALING_PATHWAY		246	0.481789	1.88106	0	0.00891565	0.486	3012	tags=39%, list=22%, signal=49%
91	GOBP_REGULATION_OF_STRIATED_MUSCLE_CELL_DIFFERENTIATION	GOBP_REGULATION_OF_STRIATED_MUSCLE_CELL_DIFFERENTIATION		76	0.555248	1.88008	0	0.00893362	0.492	2077	tags=36%, list=15%, signal=42%
92	GOBP_MORPHOGENESIS_OF_AN_EPITHELIUM	GOBP_MORPHOGENESIS_OF_AN_EPITHELIUM		478	0.457638	1.87893	0	0.00900149	0.499	3253	tags=37%, list=24%, signal=46%
93	GOBP_REGULATION_OF_PROTEIN_SERINE_THREONINE_KINASE_ACTIVITY	GOBP_REGULATION_OF_PROTEIN_SERINE_THREONINE_KINASE_ACTIVITY		302	0.471361	1.8781	0	0.00908046	0.507	3451	tags=42%, list=25%, signal=55%
94	GOBP_CELL_SURFACE_RECEPTOR_SIGNALING_PATHWAY_INVOLVED_IN_CELL_CELL_SIGNALING	GOBP_CELL_SURFACE_RECEPTOR_SIGNALING_PATHWAY_INVOLVED_IN_CELL_CELL_SIGNALING		434	0.460412	1.8751	0	0.00938237	0.524	3012	tags=35%, list=22%, signal=43%
95	GOBP_TRANSMEMBRANE_RECEPTOR_PROTEIN_TYROSINE_KINASE_SIGNALING_PATHWAY	GOBP_TRANSMEMBRANE_RECEPTOR_PROTEIN_TYROSINE_KINASE_SIGNALING_PATHWAY		500	0.458405	1.87499	0	0.00929579	0.525	3012	tags=33%, list=22%, signal=41%
96	GOBP_AXON_EXTENSION	GOBP_AXON_EXTENSION		121	0.519784	1.87492	0	0.00919896	0.525	3219	tags=42%, list=24%, signal=55%
97	GOMF_STEROL_TRANSPORTER_ACTIVITY	GOMF_STEROL_TRANSPORTER_ACTIVITY		27	0.6711	1.87384	0	0.00923726	0.532	3768	tags=67%, list=28%, signal=92%
98	GOBP_NEGATIVE_REGULATION_OF_STRIATED_MUSCLE_CELL_APOPTOTIC_PROCESS	GOBP_NEGATIVE_REGULATION_OF_STRIATED_MUSCLE_CELL_APOPTOTIC_PROCESS		37	0.633944	1.8732	0	0.00928693	0.538	1923	tags=35%, list=14%, signal=41%
99	GOBP_ER_NUCLEUS_SIGNALING_PATHWAY	GOBP_ER_NUCLEUS_SIGNALING_PATHWAY		40	0.620133	1.87175	0	0.00944238	0.549	1915	tags=45%, list=14%, signal=52%
100	GOBP_LAMELLIPODIUM_ORGANIZATION	GOBP_LAMELLIPODIUM_ORGANIZATION		81	0.541279	1.86906	0.0013624	0.00986313	0.571	3292	tags=49%, list=24%, signal=65%
101	GOBP_REGULATION_OF_JNK_CASCADE	GOBP_REGULATION_OF_JNK_CASCADE		128	0.513528	1.86859	0	0.00983499	0.573	2374	tags=35%, list=17%, signal=42%
102	GOBP_NEGATIVE_REGULATION_OF_CELL_SUBSTRATE_ADHESION	GOBP_NEGATIVE_REGULATION_OF_CELL_SUBSTRATE_ADHESION		51	0.591719	1.86708	0	0.00996886	0.583	2676	tags=37%, list=20%, signal=46%
103	GOBP_PHOSPHATIDYLINOSITOL_PHOSPHATE_BIOSYNTHETIC_PROCESS	GOBP_PHOSPHATIDYLINOSITOL_PHOSPHATE_BIOSYNTHETIC_PROCESS		48	0.592112	1.86669	0	0.00996309	0.589	2339	tags=46%, list=17%, signal=55%
104	GOBP_CARDIAC_CHAMBER_DEVELOPMENT	GOBP_CARDIAC_CHAMBER_DEVELOPMENT		154	0.497112	1.86549	0	0.0100483	0.594	2655	tags=35%, list=20%, signal=43%
105	GOBP_CELLULAR_RESPONSE_TO_HORMONE_STIMULUS	GOBP_CELLULAR_RESPONSE_TO_HORMONE_STIMULUS		401	0.464336	1.86407	0	0.0101986	0.607	2835	tags=35%, list=21%, signal=43%
106	GOBP_ACTIVATION_OF_GTPASE_ACTIVITY	GOBP_ACTIVATION_OF_GTPASE_ACTIVITY		95	0.526006	1.86406	0	0.0101024	0.607	2870	tags=43%, list=21%, signal=54%
107	GOBP_HEAD_MORPHOGENESIS	GOBP_HEAD_MORPHOGENESIS		35	0.629843	1.86284	0	0.0101508	0.617	1395	tags=37%, list=10%, signal=41%
108	GOBP_CARDIOCYTE_DIFFERENTIATION	GOBP_CARDIOCYTE_DIFFERENTIATION		140	0.501563	1.86275	0	0.0100785	0.617	3298	tags=43%, list=24%, signal=56%
109	GOBP_ROOF_OF_MOUTH_DEVELOPMENT	GOBP_ROOF_OF_MOUTH_DEVELOPMENT		80	0.54427	1.86245	0	0.0100938	0.622	2058	tags=34%, list=15%, signal=40%
110	GOMF_RNA_POLYMERASE_II_SPECIFIC_DNA_BINDING_TRANSCRIPTION_FACTOR_BINDING	GOMF_RNA_POLYMERASE_II_SPECIFIC_DNA_BINDING_TRANSCRIPTION_FACTOR_BINDING		323	0.464945	1.86232	0	0.0100128	0.622	2954	tags=40%, list=22%, signal=49%
111	GOBP_POSITIVE_REGULATION_OF_MAP_KINASE_ACTIVITY	GOBP_POSITIVE_REGULATION_OF_MAP_KINASE_ACTIVITY		115	0.515324	1.86206	0	0.00998592	0.624	3408	tags=44%, list=25%, signal=59%
112	GOBP_NEGATIVE_REGULATION_OF_BMP_SIGNALING_PATHWAY	GOBP_NEGATIVE_REGULATION_OF_BMP_SIGNALING_PATHWAY		41	0.615368	1.86201	0	0.00990725	0.624	1992	tags=41%, list=15%, signal=48%
113	GOBP_NEGATIVE_REGULATION_OF_EPITHELIAL_CELL_MIGRATION	GOBP_NEGATIVE_REGULATION_OF_EPITHELIAL_CELL_MIGRATION		61	0.56611	1.86137	0	0.0099759	0.631	3624	tags=48%, list=27%, signal=65%
114	GOBP_POSITIVE_REGULATION_OF_JUN_KINASE_ACTIVITY	GOBP_POSITIVE_REGULATION_OF_JUN_KINASE_ACTIVITY		50	0.587071	1.86123	0	0.00989885	0.631	2099	tags=36%, list=15%, signal=42%
115	GOBP_REGULATION_OF_MRNA_PROCESSING	GOBP_REGULATION_OF_MRNA_PROCESSING		135	0.511241	1.86094	0	0.00985358	0.633	3114	tags=44%, list=23%, signal=56%
116	GOBP_CARDIAC_EPITHELIAL_TO_MESENCHYMAL_TRANSITION	GOBP_CARDIAC_EPITHELIAL_TO_MESENCHYMAL_TRANSITION		29	0.651222	1.85995	0	0.00995015	0.639	1935	tags=45%, list=14%, signal=52%
117	GOBP_POSITIVE_REGULATION_OF_ACTIN_FILAMENT_POLYMERIZATION	GOBP_POSITIVE_REGULATION_OF_ACTIN_FILAMENT_POLYMERIZATION		43	0.593523	1.85845	0	0.0100752	0.644	3211	tags=51%, list=24%, signal=67%
118	GOBP_STRESS_ACTIVATED_PROTEIN_KINASE_SIGNALING_CASCADE	GOBP_STRESS_ACTIVATED_PROTEIN_KINASE_SIGNALING_CASCADE		216	0.488893	1.85841	0	0.00998984	0.644	2393	tags=33%, list=18%, signal=39%
119	GOBP_REGULATION_OF_ENDOTHELIAL_CELL_DIFFERENTIATION	GOBP_REGULATION_OF_ENDOTHELIAL_CELL_DIFFERENTIATION		40	0.603253	1.85759	0	0.0100437	0.653	2311	tags=40%, list=17%, signal=48%
120	GOBP_GASTRULATION_WITH_MOUTH_FORMING_SECOND	GOBP_GASTRULATION_WITH_MOUTH_FORMING_SECOND		23	0.685465	1.85572	0	0.0102431	0.661	3012	tags=61%, list=22%, signal=78%
121	GOMF_NUCLEAR_RECEPTOR_BINDING	GOMF_NUCLEAR_RECEPTOR_BINDING		139	0.507025	1.85475	0	0.0103328	0.668	2835	tags=40%, list=21%, signal=50%
122	GOBP_REGULATION_OF_WNT_SIGNALING_PATHWAY	GOBP_REGULATION_OF_WNT_SIGNALING_PATHWAY		266	0.469813	1.85237	0	0.0108347	0.687	3012	tags=36%, list=22%, signal=45%
123	GOMF_ALPHA_TUBULIN_BINDING	GOMF_ALPHA_TUBULIN_BINDING		32	0.640734	1.85146	0	0.0108328	0.691	3217	tags=56%, list=24%, signal=74%
124	GOBP_HEART_MORPHOGENESIS	GOBP_HEART_MORPHOGENESIS		208	0.48579	1.85042	0	0.0109155	0.704	3431	tags=42%, list=25%, signal=55%
125	GOBP_POSITIVE_REGULATION_OF_TRANSCRIPTION_FROM_RNA_POLYMERASE_II_PROMOTER_INVOLVED_IN_CELLULAR_RESPONSE_TO_CHEMICAL_STIMULUS	GOBP_POSITIVE_REGULATION_OF_TRANSCRIPTION_FROM_RNA_POLYMERASE_II_PROMOTER_INVOLVED_IN_CELLULAR_RESPONSE_TO_CHEMICAL_STIMULUS		21	0.695704	1.8495	0.00156006	0.0110343	0.712	1690	tags=48%, list=12%, signal=54%
126	GOBP_NEURAL_TUBE_FORMATION	GOBP_NEURAL_TUBE_FORMATION		118	0.508835	1.8482	0	0.0111515	0.72	2487	tags=33%, list=18%, signal=40%
127	GOBP_FACE_DEVELOPMENT	GOBP_FACE_DEVELOPMENT		51	0.586747	1.84754	0	0.0111284	0.722	1395	tags=31%, list=10%, signal=35%
128	GOBP_MUSCLE_ORGAN_DEVELOPMENT	GOBP_MUSCLE_ORGAN_DEVELOPMENT		244	0.473209	1.84695	0	0.0111514	0.726	3325	tags=43%, list=25%, signal=56%
129	GOBP_KIDNEY_EPITHELIUM_DEVELOPMENT	GOBP_KIDNEY_EPITHELIUM_DEVELOPMENT		120	0.512862	1.84579	0	0.0113371	0.735	3070	tags=42%, list=23%, signal=53%
130	GOBP_NEGATIVE_REGULATION_OF_SMALL_GTPASE_MEDIATED_SIGNAL_TRANSDUCTION	GOBP_NEGATIVE_REGULATION_OF_SMALL_GTPASE_MEDIATED_SIGNAL_TRANSDUCTION		54	0.579847	1.84436	0	0.0115475	0.744	2216	tags=44%, list=16%, signal=53%
131	GOBP_MESODERM_MORPHOGENESIS	GOBP_MESODERM_MORPHOGENESIS		50	0.584464	1.84291	0	0.011747	0.75	2477	tags=36%, list=18%, signal=44%
132	GOBP_REGULATION_OF_ORGANELLE_ASSEMBLY	GOBP_REGULATION_OF_ORGANELLE_ASSEMBLY		180	0.486154	1.8428	0	0.0116758	0.751	4257	tags=49%, list=31%, signal=71%
133	GOBP_PLACENTA_DEVELOPMENT	GOBP_PLACENTA_DEVELOPMENT		138	0.504225	1.84217	0	0.0116407	0.753	2280	tags=30%, list=17%, signal=36%
134	GOBP_NEGATIVE_REGULATION_OF_PROTEIN_SERINE_THREONINE_KINASE_ACTIVITY	GOBP_NEGATIVE_REGULATION_OF_PROTEIN_SERINE_THREONINE_KINASE_ACTIVITY		99	0.521909	1.84129	0	0.0117024	0.756	3315	tags=51%, list=24%, signal=66%
135	GOBP_FOREBRAIN_DEVELOPMENT	GOBP_FOREBRAIN_DEVELOPMENT		292	0.471125	1.83907	0	0.0120421	0.768	3249	tags=36%, list=24%, signal=46%
136	GOBP_REGULATION_OF_DEVELOPMENTAL_GROWTH	GOBP_REGULATION_OF_DEVELOPMENTAL_GROWTH		314	0.465039	1.83697	0	0.0123941	0.784	3404	tags=39%, list=25%, signal=51%
137	GOBP_REGULATION_OF_EXTENT_OF_CELL_GROWTH	GOBP_REGULATION_OF_EXTENT_OF_CELL_GROWTH		110	0.509462	1.83454	0	0.0126897	0.797	3219	tags=40%, list=24%, signal=52%
138	GOMF_EPHRIN_RECEPTOR_BINDING	GOMF_EPHRIN_RECEPTOR_BINDING		32	0.624966	1.83438	0	0.0126487	0.8	3065	tags=50%, list=23%, signal=64%
139	GOBP_STRIATED_MUSCLE_CELL_PROLIFERATION	GOBP_STRIATED_MUSCLE_CELL_PROLIFERATION		64	0.556037	1.8336	0	0.0127432	0.804	3088	tags=52%, list=23%, signal=66%
140	GOBP_DEVELOPMENTAL_CELL_GROWTH	GOBP_DEVELOPMENTAL_CELL_GROWTH		226	0.473409	1.83163	0	0.0131046	0.814	2815	tags=34%, list=21%, signal=42%
141	GOBP_POSITIVE_REGULATION_OF_BINDING	GOBP_POSITIVE_REGULATION_OF_BINDING		163	0.482683	1.82904	0	0.0136102	0.825	2543	tags=37%, list=19%, signal=45%
142	GOBP_NEGATIVE_REGULATION_OF_CELL_ADHESION	GOBP_NEGATIVE_REGULATION_OF_CELL_ADHESION		245	0.469914	1.82817	0	0.0137373	0.831	3488	tags=39%, list=26%, signal=52%
143	GOBP_ENDOTHELIUM_DEVELOPMENT	GOBP_ENDOTHELIUM_DEVELOPMENT		125	0.504067	1.82765	0	0.0137153	0.832	2868	tags=36%, list=21%, signal=45%
144	GOBP_REGULATION_OF_SYNAPTIC_VESICLE_EXOCYTOSIS	GOBP_REGULATION_OF_SYNAPTIC_VESICLE_EXOCYTOSIS		65	0.550339	1.82737	0	0.0136855	0.833	4538	tags=57%, list=33%, signal=85%
145	GOMF_SIGNALING_ADAPTOR_ACTIVITY	GOMF_SIGNALING_ADAPTOR_ACTIVITY		64	0.555564	1.82596	0	0.0139946	0.843	1632	tags=34%, list=12%, signal=39%
146	GOMF_PROTEIN_PHOSPHORYLATED_AMINO_ACID_BINDING	GOMF_PROTEIN_PHOSPHORYLATED_AMINO_ACID_BINDING		57	0.567384	1.82568	0	0.0139708	0.843	3651	tags=56%, list=27%, signal=76%
147	GOBP_REGULATION_OF_EPITHELIAL_CELL_DIFFERENTIATION	GOBP_REGULATION_OF_EPITHELIAL_CELL_DIFFERENTIATION		134	0.493876	1.82561	0	0.0138837	0.843	2448	tags=35%, list=18%, signal=42%
148	GOBP_POSITIVE_REGULATION_OF_CARTILAGE_DEVELOPMENT	GOBP_POSITIVE_REGULATION_OF_CARTILAGE_DEVELOPMENT		25	0.650625	1.82559	0.0015674	0.0137899	0.843	509	tags=20%, list=4%, signal=21%
149	GOBP_REGULATION_OF_MICROTUBULE_POLYMERIZATION	GOBP_REGULATION_OF_MICROTUBULE_POLYMERIZATION		50	0.573264	1.82499	0.00143062	0.0138626	0.846	2548	tags=34%, list=19%, signal=42%
150	GOBP_NEGATIVE_REGULATION_OF_CELL_DEVELOPMENT	GOBP_NEGATIVE_REGULATION_OF_CELL_DEVELOPMENT		168	0.483229	1.82456	0	0.0138481	0.847	3007	tags=35%, list=22%, signal=45%
151	GOBP_CARDIAC_VENTRICLE_DEVELOPMENT	GOBP_CARDIAC_VENTRICLE_DEVELOPMENT		115	0.508113	1.82438	0	0.0138029	0.849	2833	tags=37%, list=21%, signal=47%
152	GOBP_JNK_CASCADE	GOBP_JNK_CASCADE		149	0.498547	1.82403	0	0.0137963	0.852	2374	tags=34%, list=17%, signal=41%
153	GOBP_RESPONSE_TO_BMP	GOBP_RESPONSE_TO_BMP		124	0.506865	1.82368	0	0.013783	0.852	2375	tags=33%, list=18%, signal=40%
154	GOBP_CELL_FATE_COMMITMENT	GOBP_CELL_FATE_COMMITMENT		179	0.484095	1.82352	0	0.0137315	0.854	3253	tags=42%, list=24%, signal=54%
155	GOBP_NEGATIVE_REGULATION_OF_DEVELOPMENTAL_GROWTH	GOBP_NEGATIVE_REGULATION_OF_DEVELOPMENTAL_GROWTH		109	0.515655	1.82316	0	0.013756	0.856	2920	tags=39%, list=22%, signal=50%
156	GOBP_MUSCLE_CELL_DIFFERENTIATION	GOBP_MUSCLE_CELL_DIFFERENTIATION		332	0.452323	1.82179	0	0.0139606	0.863	2868	tags=33%, list=21%, signal=40%
157	GOBP_CEREBRAL_CORTEX_CELL_MIGRATION	GOBP_CEREBRAL_CORTEX_CELL_MIGRATION		43	0.587377	1.82109	0.00155039	0.0139986	0.865	3686	tags=49%, list=27%, signal=67%
158	GOBP_MORPHOGENESIS_OF_EMBRYONIC_EPITHELIUM	GOBP_MORPHOGENESIS_OF_EMBRYONIC_EPITHELIUM		151	0.490426	1.82096	0	0.0139398	0.865	2487	tags=30%, list=18%, signal=37%
159	GOBP_RESPONSE_TO_FLUID_SHEAR_STRESS	GOBP_RESPONSE_TO_FLUID_SHEAR_STRESS		23	0.668111	1.81999	0	0.0140363	0.869	2833	tags=57%, list=21%, signal=71%
160	GOBP_POSITIVE_REGULATION_OF_PROTEIN_BINDING	GOBP_POSITIVE_REGULATION_OF_PROTEIN_BINDING		89	0.52342	1.81945	0	0.0140949	0.872	2543	tags=38%, list=19%, signal=47%
161	GOBP_POST_EMBRYONIC_DEVELOPMENT	GOBP_POST_EMBRYONIC_DEVELOPMENT		93	0.517004	1.8183	0	0.014262	0.879	3007	tags=41%, list=22%, signal=52%
162	GOBP_DEVELOPMENT_OF_PRIMARY_MALE_SEXUAL_CHARACTERISTICS	GOBP_DEVELOPMENT_OF_PRIMARY_MALE_SEXUAL_CHARACTERISTICS		86	0.524616	1.81781	0	0.0142537	0.88	1948	tags=31%, list=14%, signal=36%
163	GOBP_TISSUE_MIGRATION	GOBP_TISSUE_MIGRATION		284	0.458693	1.81633	0	0.0144607	0.882	2216	tags=28%, list=16%, signal=33%
164	GOBP_REGULATION_OF_ENDOTHELIAL_CELL_MIGRATION	GOBP_REGULATION_OF_ENDOTHELIAL_CELL_MIGRATION		153	0.483314	1.81624	0	0.014394	0.882	2216	tags=27%, list=16%, signal=32%
165	GOBP_EPITHELIAL_TUBE_MORPHOGENESIS	GOBP_EPITHELIAL_TUBE_MORPHOGENESIS		329	0.456096	1.8161	0	0.0143564	0.882	3253	tags=37%, list=24%, signal=47%
166	GOBP_CELLULAR_RESPONSE_TO_OSMOTIC_STRESS	GOBP_CELLULAR_RESPONSE_TO_OSMOTIC_STRESS		36	0.609581	1.81533	0.0015528	0.0144249	0.887	1993	tags=36%, list=15%, signal=42%
167	GOBP_VENTRICULAR_SEPTUM_MORPHOGENESIS	GOBP_VENTRICULAR_SEPTUM_MORPHOGENESIS		43	0.586668	1.81432	0	0.0145841	0.89	2636	tags=44%, list=19%, signal=55%
168	GOBP_NEGATIVE_REGULATION_OF_BLOOD_VESSEL_ENDOTHELIAL_CELL_MIGRATION	GOBP_NEGATIVE_REGULATION_OF_BLOOD_VESSEL_ENDOTHELIAL_CELL_MIGRATION		33	0.619334	1.8117	0.00312012	0.0150071	0.896	2833	tags=39%, list=21%, signal=50%
169	GOCC_SIN3_TYPE_COMPLEX	GOCC_SIN3_TYPE_COMPLEX		21	0.690635	1.81112	0.00161031	0.0150568	0.898	2725	tags=62%, list=20%, signal=77%
170	GOBP_CIRCADIAN_RHYTHM	GOBP_CIRCADIAN_RHYTHM		173	0.48141	1.81015	0	0.0152161	0.902	2758	tags=34%, list=20%, signal=42%
171	GOMF_TAU_PROTEIN_BINDING	GOMF_TAU_PROTEIN_BINDING		20	0.667999	1.80935	0.00157729	0.0152844	0.905	3039	tags=70%, list=22%, signal=90%
172	GOCC_INTERMEDIATE_FILAMENT	GOCC_INTERMEDIATE_FILAMENT		64	0.550576	1.80895	0	0.0152844	0.905	3595	tags=50%, list=26%, signal=68%
173	GOBP_SKELETAL_SYSTEM_MORPHOGENESIS	GOBP_SKELETAL_SYSTEM_MORPHOGENESIS		190	0.474529	1.80859	0	0.0152297	0.905	3431	tags=41%, list=25%, signal=54%
174	GOMF_PHOSPHATASE_BINDING	GOMF_PHOSPHATASE_BINDING		199	0.474392	1.8081	0	0.0152567	0.905	3069	tags=41%, list=23%, signal=52%
175	GOBP_POSITIVE_REGULATION_OF_CELLULAR_RESPONSE_TO_TRANSFORMING_GROWTH_FACTOR_BETA_STIMULUS	GOBP_POSITIVE_REGULATION_OF_CELLULAR_RESPONSE_TO_TRANSFORMING_GROWTH_FACTOR_BETA_STIMULUS		32	0.622643	1.80753	0	0.0152698	0.906	1970	tags=50%, list=15%, signal=58%
176	GOBP_REGULATION_OF_MACROAUTOPHAGY	GOBP_REGULATION_OF_MACROAUTOPHAGY		104	0.50418	1.80717	0	0.0152497	0.906	2595	tags=36%, list=19%, signal=44%
177	GOBP_REGULATION_OF_NEURON_DIFFERENTIATION	GOBP_REGULATION_OF_NEURON_DIFFERENTIATION		174	0.480854	1.80497	0	0.0156799	0.911	3702	tags=39%, list=27%, signal=53%
178	GOMF_SUMO_TRANSFERASE_ACTIVITY	GOMF_SUMO_TRANSFERASE_ACTIVITY		20	0.684423	1.80444	0.00157978	0.0156971	0.914	1038	tags=50%, list=8%, signal=54%
179	GOBP_CELLULAR_RESPONSE_TO_STEROID_HORMONE_STIMULUS	GOBP_CELLULAR_RESPONSE_TO_STEROID_HORMONE_STIMULUS		133	0.496653	1.8028	0	0.0159702	0.914	2631	tags=38%, list=19%, signal=47%
180	GOBP_ARF_PROTEIN_SIGNAL_TRANSDUCTION	GOBP_ARF_PROTEIN_SIGNAL_TRANSDUCTION		18	0.709059	1.80178	0.00161031	0.0161483	0.918	3137	tags=78%, list=23%, signal=101%
181	GOBP_POSITIVE_REGULATION_OF_CELL_MIGRATION_INVOLVED_IN_SPROUTING_ANGIOGENESIS	GOBP_POSITIVE_REGULATION_OF_CELL_MIGRATION_INVOLVED_IN_SPROUTING_ANGIOGENESIS		19	0.695124	1.80176	0.0015528	0.0160591	0.918	1156	tags=32%, list=9%, signal=34%
182	GOMF_PROTEIN_KINASE_ACTIVITY	GOMF_PROTEIN_KINASE_ACTIVITY		470	0.441653	1.80157	0	0.0160287	0.918	2896	tags=36%, list=21%, signal=45%
183	GOCC_I_BAND	GOCC_I_BAND		102	0.507103	1.80156	0	0.0159475	0.918	3230	tags=41%, list=24%, signal=54%
184	MP_INCREASED_INCIDENCE_OF_TUMORS_BY_CHEMICAL_INDUCTION	MP_INCREASED_INCIDENCE_OF_TUMORS_BY_CHEMICAL_INDUCTION		115	0.500147	1.80133	0.00130719	0.0158862	0.919	2680	tags=40%, list=20%, signal=49%
185	GOBP_RESPONSE_TO_PROGESTERONE	GOBP_RESPONSE_TO_PROGESTERONE		16	0.730193	1.80085	0	0.0158893	0.92	2512	tags=63%, list=19%, signal=77%
186	GOBP_NEURON_PROJECTION_EXTENSION	GOBP_NEURON_PROJECTION_EXTENSION		169	0.480875	1.80073	0	0.0158353	0.922	3219	tags=37%, list=24%, signal=47%
187	GOBP_DEVELOPMENTAL_GROWTH_INVOLVED_IN_MORPHOGENESIS	GOBP_DEVELOPMENTAL_GROWTH_INVOLVED_IN_MORPHOGENESIS		233	0.466086	1.80043	0	0.0158134	0.924	2815	tags=33%, list=21%, signal=41%
188	GOBP_PRIMARY_NEURAL_TUBE_FORMATION	GOBP_PRIMARY_NEURAL_TUBE_FORMATION		105	0.514004	1.79982	0	0.0158481	0.927	2487	tags=33%, list=18%, signal=40%
189	GOMF_PHOSPHOTYROSINE_RESIDUE_BINDING	GOMF_PHOSPHOTYROSINE_RESIDUE_BINDING		44	0.56775	1.79926	0	0.0158758	0.929	3651	tags=55%, list=27%, signal=74%
190	GOBP_REGULATION_OF_EXTRACELLULAR_MATRIX_ORGANIZATION	GOBP_REGULATION_OF_EXTRACELLULAR_MATRIX_ORGANIZATION		51	0.564716	1.7984	0.00144509	0.0160146	0.932	2934	tags=41%, list=22%, signal=52%
191	GOBP_ENDOCARDIAL_CUSHION_DEVELOPMENT	GOBP_ENDOCARDIAL_CUSHION_DEVELOPMENT		44	0.58884	1.79716	0	0.0161395	0.934	2636	tags=45%, list=19%, signal=56%
192	GOBP_FOREBRAIN_CELL_MIGRATION	GOBP_FOREBRAIN_CELL_MIGRATION		54	0.557503	1.79712	0	0.0160676	0.934	3686	tags=48%, list=27%, signal=66%
193	GOBP_NIK_NF_KAPPAB_SIGNALING	GOBP_NIK_NF_KAPPAB_SIGNALING		97	0.50803	1.79652	0	0.0161483	0.935	1984	tags=31%, list=15%, signal=36%
194	GOBP_PEPTIDYL_SERINE_MODIFICATION	GOBP_PEPTIDYL_SERINE_MODIFICATION		286	0.457766	1.79561	0	0.0162465	0.938	2702	tags=32%, list=20%, signal=39%
195	GOBP_CARDIAC_SEPTUM_MORPHOGENESIS	GOBP_CARDIAC_SEPTUM_MORPHOGENESIS		66	0.542837	1.79398	0	0.0165551	0.945	2636	tags=41%, list=19%, signal=51%
196	GOMF_STEROL_BINDING	GOMF_STEROL_BINDING		46	0.576635	1.7939	0	0.0165006	0.945	3811	tags=50%, list=28%, signal=69%
197	GOBP_HEART_VALVE_MORPHOGENESIS	GOBP_HEART_VALVE_MORPHOGENESIS		40	0.582958	1.79383	0	0.0164228	0.945	3308	tags=52%, list=24%, signal=69%
198	GOBP_NEGATIVE_REGULATION_OF_INTRACELLULAR_SIGNAL_TRANSDUCTION	GOBP_NEGATIVE_REGULATION_OF_INTRACELLULAR_SIGNAL_TRANSDUCTION		441	0.444662	1.79222	0	0.0166538	0.949	2965	tags=36%, list=22%, signal=45%
199	GOBP_REGULATION_OF_RAC_PROTEIN_SIGNAL_TRANSDUCTION	GOBP_REGULATION_OF_RAC_PROTEIN_SIGNAL_TRANSDUCTION		22	0.666314	1.79204	0.00320513	0.0165937	0.949	2557	tags=55%, list=19%, signal=67%
200	GOMF_PROTEIN_SERINE_THREONINE_KINASE_ACTIVITY	GOMF_PROTEIN_SERINE_THREONINE_KINASE_ACTIVITY		359	0.451337	1.79091	0	0.0167801	0.953	2702	tags=36%, list=20%, signal=43%
201	GOBP_CARDIAC_CELL_DEVELOPMENT	GOBP_CARDIAC_CELL_DEVELOPMENT		79	0.52081	1.79023	0	0.0169004	0.953	3298	tags=47%, list=24%, signal=62%
202	GOBP_POSITIVE_REGULATION_OF_AMYLOID_PRECURSOR_PROTEIN_CATABOLIC_PROCESS	GOBP_POSITIVE_REGULATION_OF_AMYLOID_PRECURSOR_PROTEIN_CATABOLIC_PROCESS		21	0.659085	1.78994	0.00164745	0.0168864	0.953	2479	tags=52%, list=18%, signal=64%
203	GOBP_CEREBRAL_CORTEX_DEVELOPMENT	GOBP_CEREBRAL_CORTEX_DEVELOPMENT		89	0.511396	1.7886	0	0.017098	0.954	3706	tags=44%, list=27%, signal=60%
204	GOBP_MUSCLE_CELL_PROLIFERATION	GOBP_MUSCLE_CELL_PROLIFERATION		218	0.462282	1.78811	0	0.0171471	0.955	3142	tags=40%, list=23%, signal=51%
205	GOBP_AXON_DEVELOPMENT	GOBP_AXON_DEVELOPMENT		438	0.440185	1.78687	0	0.0174233	0.957	3721	tags=38%, list=27%, signal=51%
206	GOBP_PROTEIN_REFOLDING	GOBP_PROTEIN_REFOLDING		23	0.667797	1.78608	0.00157233	0.017618	0.959	1432	tags=39%, list=11%, signal=44%
207	GOMF_STEROID_BINDING	GOMF_STEROID_BINDING		70	0.528222	1.78573	0.00135685	0.0175896	0.961	3811	tags=46%, list=28%, signal=63%
208	GOBP_MRNA_TRANSCRIPTION	GOBP_MRNA_TRANSCRIPTION		49	0.565023	1.78543	0	0.0175672	0.961	2580	tags=45%, list=19%, signal=55%
209	GOBP_REGULATION_OF_TRANSLATION_IN_RESPONSE_TO_STRESS	GOBP_REGULATION_OF_TRANSLATION_IN_RESPONSE_TO_STRESS		19	0.691781	1.78488	0.00159744	0.0175843	0.961	944	tags=37%, list=7%, signal=40%
210	GOBP_POSITIVE_REGULATION_OF_PROTEIN_KINASE_B_SIGNALING	GOBP_POSITIVE_REGULATION_OF_PROTEIN_KINASE_B_SIGNALING		91	0.516669	1.78368	0	0.0177745	0.961	3072	tags=42%, list=23%, signal=54%
211	GOCC_ACTIN_CYTOSKELETON	GOCC_ACTIN_CYTOSKELETON		396	0.443566	1.78319	0	0.0178458	0.961	3017	tags=35%, list=22%, signal=43%
212	GOBP_REGULATION_OF_ANDROGEN_RECEPTOR_SIGNALING_PATHWAY	GOBP_REGULATION_OF_ANDROGEN_RECEPTOR_SIGNALING_PATHWAY		23	0.650673	1.78301	0.00160256	0.0178005	0.961	2183	tags=48%, list=16%, signal=57%
213	GOBP_RAC_PROTEIN_SIGNAL_TRANSDUCTION	GOBP_RAC_PROTEIN_SIGNAL_TRANSDUCTION		44	0.572124	1.78295	0	0.017728	0.961	3130	tags=50%, list=23%, signal=65%
214	GOBP_NEGATIVE_REGULATION_OF_WNT_SIGNALING_PATHWAY	GOBP_NEGATIVE_REGULATION_OF_WNT_SIGNALING_PATHWAY		141	0.483643	1.7826	0	0.0177547	0.964	2814	tags=34%, list=21%, signal=43%
215	GOBP_EPHRIN_RECEPTOR_SIGNALING_PATHWAY	GOBP_EPHRIN_RECEPTOR_SIGNALING_PATHWAY		33	0.619123	1.78244	0	0.017694	0.964	2284	tags=36%, list=17%, signal=44%
216	GOMF_PRE_MRNA_BINDING	GOMF_PRE_MRNA_BINDING		36	0.604548	1.78111	0	0.0179699	0.965	3706	tags=58%, list=27%, signal=80%
217	GOBP_EPITHELIAL_CELL_DIFFERENTIATION_INVOLVED_IN_KIDNEY_DEVELOPMENT	GOBP_EPITHELIAL_CELL_DIFFERENTIATION_INVOLVED_IN_KIDNEY_DEVELOPMENT		34	0.598989	1.78086	0	0.0179627	0.965	2833	tags=50%, list=21%, signal=63%
218	GOMF_NUCLEOSIDE_TRIPHOSPHATASE_REGULATOR_ACTIVITY	GOMF_NUCLEOSIDE_TRIPHOSPHATASE_REGULATOR_ACTIVITY		390	0.440598	1.78074	0	0.0178964	0.965	3159	tags=40%, list=23%, signal=51%
219	GOBP_VENTRICULAR_SEPTUM_DEVELOPMENT	GOBP_VENTRICULAR_SEPTUM_DEVELOPMENT		69	0.53276	1.77926	0.00145138	0.0181945	0.966	2655	tags=41%, list=20%, signal=50%
220	GOBP_REGULATION_OF_NON_CANONICAL_WNT_SIGNALING_PATHWAY	GOBP_REGULATION_OF_NON_CANONICAL_WNT_SIGNALING_PATHWAY		23	0.651481	1.77878	0.00324149	0.0182346	0.966	1122	tags=30%, list=8%, signal=33%
221	GOBP_POSITIVE_REGULATION_OF_PROTEIN_SERINE_THREONINE_KINASE_ACTIVITY	GOBP_POSITIVE_REGULATION_OF_PROTEIN_SERINE_THREONINE_KINASE_ACTIVITY		171	0.471698	1.77868	0	0.0181944	0.966	3408	tags=39%, list=25%, signal=52%
222	GOCC_PHOSPHATASE_COMPLEX	GOCC_PHOSPHATASE_COMPLEX		48	0.568952	1.77829	0	0.0182127	0.966	2794	tags=54%, list=21%, signal=68%
223	GOBP_REGULATION_OF_CELL_DEVELOPMENT	GOBP_REGULATION_OF_CELL_DEVELOPMENT		483	0.435931	1.778	0	0.0181996	0.968	3103	tags=33%, list=23%, signal=41%
224	GOBP_REGULATION_OF_PROTEIN_BINDING	GOBP_REGULATION_OF_PROTEIN_BINDING		188	0.467079	1.77682	0	0.0184068	0.969	2543	tags=34%, list=19%, signal=41%
225	GOBP_MESODERM_DEVELOPMENT	GOBP_MESODERM_DEVELOPMENT		81	0.51525	1.77662	0	0.0183406	0.97	2477	tags=36%, list=18%, signal=44%
226	GOBP_SKELETAL_MUSCLE_ORGAN_DEVELOPMENT	GOBP_SKELETAL_MUSCLE_ORGAN_DEVELOPMENT		141	0.484375	1.77651	0	0.0182857	0.97	3298	tags=47%, list=24%, signal=61%
227	GOBP_MORPHOGENESIS_OF_A_BRANCHING_STRUCTURE	GOBP_MORPHOGENESIS_OF_A_BRANCHING_STRUCTURE		215	0.464504	1.77633	0	0.0182566	0.973	2840	tags=33%, list=21%, signal=42%
228	GOBP_MIRNA_TRANSCRIPTION	GOBP_MIRNA_TRANSCRIPTION		59	0.548267	1.77609	0.00143885	0.0182227	0.973	2282	tags=42%, list=17%, signal=51%
229	GOBP_POSITIVE_REGULATION_OF_ORGANELLE_ASSEMBLY	GOBP_POSITIVE_REGULATION_OF_ORGANELLE_ASSEMBLY		71	0.529169	1.77601	0.00139082	0.0181584	0.973	2595	tags=38%, list=19%, signal=47%
230	GOBP_ANDROGEN_RECEPTOR_SIGNALING_PATHWAY	GOBP_ANDROGEN_RECEPTOR_SIGNALING_PATHWAY		34	0.599148	1.77596	0	0.0180845	0.973	2183	tags=47%, list=16%, signal=56%
231	GOBP_EMBRYONIC_PLACENTA_DEVELOPMENT	GOBP_EMBRYONIC_PLACENTA_DEVELOPMENT		93	0.504402	1.77584	0	0.0180266	0.973	2512	tags=34%, list=19%, signal=42%
232	GOBP_AUTOPHAGY_OF_NUCLEUS	GOBP_AUTOPHAGY_OF_NUCLEUS		15	0.716764	1.77547	0.00340136	0.0180704	0.973	2402	tags=47%, list=18%, signal=57%
233	GOBP_REGULATION_OF_CANONICAL_WNT_SIGNALING_PATHWAY	GOBP_REGULATION_OF_CANONICAL_WNT_SIGNALING_PATHWAY		214	0.458574	1.77525	0	0.0180532	0.973	3012	tags=36%, list=22%, signal=46%
234	GOBP_POSITIVE_REGULATION_OF_JNK_CASCADE	GOBP_POSITIVE_REGULATION_OF_JNK_CASCADE		83	0.5157	1.77499	0	0.0180613	0.974	2374	tags=36%, list=17%, signal=44%
235	GOBP_SEMAPHORIN_PLEXIN_SIGNALING_PATHWAY	GOBP_SEMAPHORIN_PLEXIN_SIGNALING_PATHWAY		45	0.566635	1.77487	0	0.0180095	0.974	2920	tags=38%, list=22%, signal=48%
236	GOBP_POSITIVE_REGULATION_OF_MAPK_CASCADE	GOBP_POSITIVE_REGULATION_OF_MAPK_CASCADE		394	0.441105	1.77383	0	0.0181867	0.977	3568	tags=41%, list=26%, signal=53%
237	GOBP_REGULATION_OF_LAMELLIPODIUM_ORGANIZATION	GOBP_REGULATION_OF_LAMELLIPODIUM_ORGANIZATION		42	0.583191	1.77328	0	0.0182877	0.978	2484	tags=48%, list=18%, signal=58%
238	GOCC_SITE_OF_POLARIZED_GROWTH	GOCC_SITE_OF_POLARIZED_GROWTH		179	0.471436	1.77272	0	0.0183687	0.979	3851	tags=41%, list=28%, signal=57%
239	GOBP_SKELETAL_SYSTEM_DEVELOPMENT	GOBP_SKELETAL_SYSTEM_DEVELOPMENT		423	0.440137	1.77229	0	0.01838	0.979	3453	tags=37%, list=25%, signal=48%
240	GOBP_BLOOD_VESSEL_ENDOTHELIAL_CELL_MIGRATION	GOBP_BLOOD_VESSEL_ENDOTHELIAL_CELL_MIGRATION		113	0.498235	1.77213	0	0.0183425	0.979	3072	tags=35%, list=23%, signal=45%
241	GOBP_CENTRAL_NERVOUS_SYSTEM_NEURON_DIFFERENTIATION	GOBP_CENTRAL_NERVOUS_SYSTEM_NEURON_DIFFERENTIATION		133	0.483325	1.77205	0	0.018281	0.979	1970	tags=23%, list=15%, signal=27%
242	GOBP_POSITIVE_REGULATION_OF_DNA_BINDING_TRANSCRIPTION_FACTOR_ACTIVITY	GOBP_POSITIVE_REGULATION_OF_DNA_BINDING_TRANSCRIPTION_FACTOR_ACTIVITY		215	0.457833	1.77129	0	0.0184336	0.979	2384	tags=32%, list=18%, signal=38%
243	GOBP_REGULATION_OF_MICROTUBULE_BASED_PROCESS	GOBP_REGULATION_OF_MICROTUBULE_BASED_PROCESS		206	0.463066	1.77126	0	0.0183724	0.979	2906	tags=33%, list=21%, signal=42%
244	GOBP_CELL_GROWTH	GOBP_CELL_GROWTH		441	0.435889	1.77111	0	0.0183548	0.98	2960	tags=34%, list=22%, signal=42%
245	GOBP_NEGATIVE_REGULATION_OF_MIRNA_METABOLIC_PROCESS	GOBP_NEGATIVE_REGULATION_OF_MIRNA_METABOLIC_PROCESS		20	0.682423	1.77079	0	0.0183754	0.982	2113	tags=50%, list=16%, signal=59%
246	GOMF_BETA_CATENIN_BINDING	GOMF_BETA_CATENIN_BINDING		84	0.515995	1.76998	0	0.0185386	0.983	3007	tags=43%, list=22%, signal=55%
247	GOCC_GLUTAMATERGIC_SYNAPSE	GOCC_GLUTAMATERGIC_SYNAPSE		422	0.433659	1.76928	0	0.0186395	0.984	3560	tags=36%, list=26%, signal=47%
248	GOBP_REGULATION_OF_SUBSTRATE_ADHESION_DEPENDENT_CELL_SPREADING	GOBP_REGULATION_OF_SUBSTRATE_ADHESION_DEPENDENT_CELL_SPREADING		53	0.548653	1.76914	0	0.0185927	0.984	1890	tags=28%, list=14%, signal=33%
249	GOBP_NEGATIVE_REGULATION_OF_AXON_EXTENSION	GOBP_NEGATIVE_REGULATION_OF_AXON_EXTENSION		42	0.576897	1.7689	0.0014556	0.0185698	0.984	2319	tags=38%, list=17%, signal=46%
250	GOBP_REGULATION_OF_NEUROTRANSMITTER_TRANSPORT	GOBP_REGULATION_OF_NEUROTRANSMITTER_TRANSPORT		110	0.495727	1.7689	0.00130548	0.0184955	0.984	4566	tags=54%, list=34%, signal=80%
251	GOMF_PROTEIN_PHOSPHATASE_REGULATOR_ACTIVITY	GOMF_PROTEIN_PHOSPHATASE_REGULATOR_ACTIVITY		70	0.527634	1.76796	0	0.0186509	0.985	2736	tags=34%, list=20%, signal=43%
252	GOMF_PHOSPHOPROTEIN_BINDING	GOMF_PHOSPHOPROTEIN_BINDING		97	0.507383	1.76772	0.00138313	0.0186466	0.986	3651	tags=52%, list=27%, signal=70%
253	GOBP_NEURON_PROJECTION_GUIDANCE	GOBP_NEURON_PROJECTION_GUIDANCE		196	0.46312	1.76737	0	0.0186844	0.986	4465	tags=51%, list=33%, signal=74%
254	GOBP_POSITIVE_REGULATION_OF_PROTEIN_CONTAINING_COMPLEX_ASSEMBLY	GOBP_POSITIVE_REGULATION_OF_PROTEIN_CONTAINING_COMPLEX_ASSEMBLY		169	0.479379	1.76671	0	0.018777	0.987	3148	tags=42%, list=23%, signal=54%
255	GOBP_RESPONSE_TO_STEROID_HORMONE	GOBP_RESPONSE_TO_STEROID_HORMONE		180	0.464767	1.76613	0	0.0188502	0.987	2548	tags=34%, list=19%, signal=41%
256	GOBP_NEGATIVE_REGULATION_OF_CELL_PROJECTION_ORGANIZATION	GOBP_NEGATIVE_REGULATION_OF_CELL_PROJECTION_ORGANIZATION		189	0.463121	1.766	0	0.0188176	0.987	3879	tags=41%, list=29%, signal=57%
257	GOMF_MITOGEN_ACTIVATED_PROTEIN_KINASE_BINDING	GOMF_MITOGEN_ACTIVATED_PROTEIN_KINASE_BINDING		32	0.612538	1.7659	0	0.0187717	0.987	3481	tags=66%, list=26%, signal=88%
258	GOBP_REGULATION_OF_AXONOGENESIS	GOBP_REGULATION_OF_AXONOGENESIS		161	0.475311	1.7658	0	0.0187354	0.987	3204	tags=36%, list=24%, signal=47%
259	GOBP_MUSCLE_CELL_DEVELOPMENT	GOBP_MUSCLE_CELL_DEVELOPMENT		160	0.47419	1.76554	0	0.0187309	0.987	3740	tags=47%, list=28%, signal=64%
260	GOBP_BODY_MORPHOGENESIS	GOBP_BODY_MORPHOGENESIS		51	0.552137	1.76509	0	0.0188124	0.988	1395	tags=31%, list=10%, signal=35%
261	GOBP_REGULATION_OF_AMYLOID_PRECURSOR_PROTEIN_CATABOLIC_PROCESS	GOBP_REGULATION_OF_AMYLOID_PRECURSOR_PROTEIN_CATABOLIC_PROCESS		38	0.588722	1.76484	0.00296736	0.018785	0.988	2553	tags=42%, list=19%, signal=52%
262	GOBP_NEGATIVE_REGULATION_OF_LOCOMOTION	GOBP_NEGATIVE_REGULATION_OF_LOCOMOTION		294	0.451424	1.76482	0	0.0187178	0.988	3446	tags=39%, list=25%, signal=51%
263	GOBP_REGULATION_OF_BINDING	GOBP_REGULATION_OF_BINDING		333	0.444756	1.76392	0	0.0189363	0.988	2545	tags=33%, list=19%, signal=40%
264	GOBP_T_HELPER_17_TYPE_IMMUNE_RESPONSE	GOBP_T_HELPER_17_TYPE_IMMUNE_RESPONSE		32	0.603889	1.76377	0.0030349	0.018909	0.988	2628	tags=50%, list=19%, signal=62%
265	GOMF_ATPASE_COUPLED_INTRAMEMBRANE_LIPID_TRANSPORTER_ACTIVITY	GOMF_ATPASE_COUPLED_INTRAMEMBRANE_LIPID_TRANSPORTER_ACTIVITY		23	0.647462	1.76372	0	0.0188464	0.988	2267	tags=43%, list=17%, signal=52%
266	GOMF_DNA_BINDING_TRANSCRIPTION_FACTOR_BINDING	GOMF_DNA_BINDING_TRANSCRIPTION_FACTOR_BINDING		443	0.433026	1.76285	0	0.0189346	0.988	2954	tags=37%, list=22%, signal=46%
267	GOBP_POSITIVE_REGULATION_OF_FIBROBLAST_MIGRATION	GOBP_POSITIVE_REGULATION_OF_FIBROBLAST_MIGRATION		21	0.648281	1.76217	0	0.0190347	0.991	3072	tags=57%, list=23%, signal=74%
268	GOMF_TRANSCRIPTION_COREGULATOR_BINDING	GOMF_TRANSCRIPTION_COREGULATOR_BINDING		115	0.484634	1.76052	0	0.0194096	0.992	2774	tags=39%, list=20%, signal=49%
269	GOBP_BONE_MINERALIZATION	GOBP_BONE_MINERALIZATION		98	0.492662	1.76048	0	0.0193504	0.992	2928	tags=35%, list=22%, signal=44%
270	GOBP_CARDIAC_MUSCLE_CELL_PROLIFERATION	GOBP_CARDIAC_MUSCLE_CELL_PROLIFERATION		50	0.552619	1.7604	0	0.0192962	0.992	2991	tags=50%, list=22%, signal=64%
271	GOBP_CELLULAR_RESPONSE_TO_FLUID_SHEAR_STRESS	GOBP_CELLULAR_RESPONSE_TO_FLUID_SHEAR_STRESS		16	0.698955	1.76032	0.00486224	0.0192553	0.992	2833	tags=69%, list=21%, signal=87%
272	GOBP_CELL_SURFACE_RECEPTOR_SIGNALING_PATHWAY_INVOLVED_IN_HEART_DEVELOPMENT	GOBP_CELL_SURFACE_RECEPTOR_SIGNALING_PATHWAY_INVOLVED_IN_HEART_DEVELOPMENT		23	0.63604	1.76004	0.00326264	0.019275	0.992	2448	tags=48%, list=18%, signal=58%
273	GOBP_REGULATION_OF_RECEPTOR_INTERNALIZATION	GOBP_REGULATION_OF_RECEPTOR_INTERNALIZATION		66	0.536157	1.75978	0	0.0192773	0.992	2491	tags=33%, list=18%, signal=41%
274	GOBP_PROTEIN_AUTOPHOSPHORYLATION	GOBP_PROTEIN_AUTOPHOSPHORYLATION		212	0.460584	1.75899	0	0.0194297	0.992	3400	tags=42%, list=25%, signal=55%
275	GOBP_NEGATIVE_REGULATION_OF_CELLULAR_RESPONSE_TO_GROWTH_FACTOR_STIMULUS	GOBP_NEGATIVE_REGULATION_OF_CELLULAR_RESPONSE_TO_GROWTH_FACTOR_STIMULUS		81	0.513433	1.75802	0	0.0196194	0.992	2129	tags=33%, list=16%, signal=39%
276	GOCC_HISTONE_DEACETYLASE_COMPLEX	GOCC_HISTONE_DEACETYLASE_COMPLEX		77	0.515131	1.75791	0	0.0195737	0.992	2725	tags=36%, list=20%, signal=45%
277	GOBP_INTRACELLULAR_RECEPTOR_SIGNALING_PATHWAY	GOBP_INTRACELLULAR_RECEPTOR_SIGNALING_PATHWAY		181	0.463979	1.7579	0	0.0195031	0.992	2650	tags=37%, list=20%, signal=45%
278	GOBP_BRANCHING_MORPHOGENESIS_OF_AN_EPITHELIAL_TUBE	GOBP_BRANCHING_MORPHOGENESIS_OF_AN_EPITHELIAL_TUBE		165	0.469684	1.75757	0	0.0195383	0.992	2840	tags=35%, list=21%, signal=44%
279	GOBP_REGULATION_OF_LIPID_LOCALIZATION	GOBP_REGULATION_OF_LIPID_LOCALIZATION		136	0.482518	1.75725	0	0.0195523	0.992	3507	tags=42%, list=26%, signal=56%
280	GOBP_NEGATIVE_REGULATION_OF_MICROTUBULE_POLYMERIZATION_OR_DEPOLYMERIZATION	GOBP_NEGATIVE_REGULATION_OF_MICROTUBULE_POLYMERIZATION_OR_DEPOLYMERIZATION		42	0.570467	1.75675	0	0.0196166	0.993	2365	tags=36%, list=17%, signal=43%
281	GOBP_RESPONSE_TO_MURAMYL_DIPEPTIDE	GOBP_RESPONSE_TO_MURAMYL_DIPEPTIDE		15	0.712465	1.75356	0.00318471	0.0203657	0.995	589	tags=33%, list=4%, signal=35%
282	GOBP_TRABECULA_MORPHOGENESIS	GOBP_TRABECULA_MORPHOGENESIS		50	0.554544	1.75252	0	0.0205433	0.995	2486	tags=40%, list=18%, signal=49%
283	GOBP_MIRNA_METABOLIC_PROCESS	GOBP_MIRNA_METABOLIC_PROCESS		71	0.520255	1.75236	0	0.0205123	0.995	2113	tags=38%, list=16%, signal=45%
284	GOBP_CEREBRAL_CORTEX_NEURON_DIFFERENTIATION	GOBP_CEREBRAL_CORTEX_NEURON_DIFFERENTIATION		17	0.67778	1.75084	0.00169779	0.0209027	0.996	1227	tags=24%, list=9%, signal=26%
285	GOBP_REGULATION_OF_MONOOXYGENASE_ACTIVITY	GOBP_REGULATION_OF_MONOOXYGENASE_ACTIVITY		39	0.583404	1.75031	0	0.0209695	0.996	2479	tags=36%, list=18%, signal=44%
286	GOBP_MODIFICATION_OF_SYNAPTIC_STRUCTURE	GOBP_MODIFICATION_OF_SYNAPTIC_STRUCTURE		31	0.608792	1.74946	0.0030349	0.0211381	0.996	3022	tags=52%, list=22%, signal=66%
287	GOBP_CELL_SUBSTRATE_JUNCTION_ORGANIZATION	GOBP_CELL_SUBSTRATE_JUNCTION_ORGANIZATION		91	0.500086	1.74816	0	0.0214205	0.996	2660	tags=36%, list=20%, signal=45%
288	GOBP_REGULATION_OF_CELL_GROWTH	GOBP_REGULATION_OF_CELL_GROWTH		374	0.436909	1.7481	0	0.0213665	0.996	2548	tags=31%, list=19%, signal=37%
289	GOBP_NEGATIVE_REGULATION_OF_MAPK_CASCADE	GOBP_NEGATIVE_REGULATION_OF_MAPK_CASCADE		157	0.46946	1.748	0	0.0213371	0.996	3701	tags=45%, list=27%, signal=61%
290	GOBP_HEART_VALVE_DEVELOPMENT	GOBP_HEART_VALVE_DEVELOPMENT		49	0.546572	1.74761	0.00143472	0.0213726	0.996	2833	tags=47%, list=21%, signal=59%
291	GOMF_SIGNALING_RECEPTOR_COMPLEX_ADAPTOR_ACTIVITY	GOMF_SIGNALING_RECEPTOR_COMPLEX_ADAPTOR_ACTIVITY		36	0.596116	1.74739	0.00920245	0.0213555	0.996	1632	tags=36%, list=12%, signal=41%
292	GOBP_VENTRICULAR_TRABECULA_MYOCARDIUM_MORPHOGENESIS	GOBP_VENTRICULAR_TRABECULA_MYOCARDIUM_MORPHOGENESIS		15	0.708628	1.74709	0.00486224	0.0213748	0.996	2448	tags=67%, list=18%, signal=81%
293	GOMF_PROMOTER_SPECIFIC_CHROMATIN_BINDING	GOMF_PROMOTER_SPECIFIC_CHROMATIN_BINDING		65	0.523012	1.74612	0	0.0216022	0.996	2309	tags=45%, list=17%, signal=54%
294	GOBP_NEURAL_CREST_CELL_DIFFERENTIATION	GOBP_NEURAL_CREST_CELL_DIFFERENTIATION		83	0.502417	1.74587	0	0.0215926	0.996	3343	tags=40%, list=25%, signal=52%
295	GOBP_REGULATION_OF_FAT_CELL_DIFFERENTIATION	GOBP_REGULATION_OF_FAT_CELL_DIFFERENTIATION		125	0.478243	1.74537	0	0.0216665	0.996	2334	tags=31%, list=17%, signal=37%
296	GOBP_COLUMNAR_CUBOIDAL_EPITHELIAL_CELL_DIFFERENTIATION	GOBP_COLUMNAR_CUBOIDAL_EPITHELIAL_CELL_DIFFERENTIATION		101	0.497049	1.74459	0	0.0218189	0.996	2534	tags=33%, list=19%, signal=40%
297	GOBP_LAMELLIPODIUM_ASSEMBLY	GOBP_LAMELLIPODIUM_ASSEMBLY		64	0.530872	1.74439	0	0.0218244	0.996	3118	tags=48%, list=23%, signal=63%
298	GOBP_NEGATIVE_REGULATION_OF_CELL_MIGRATION_INVOLVED_IN_SPROUTING_ANGIOGENESIS	GOBP_NEGATIVE_REGULATION_OF_CELL_MIGRATION_INVOLVED_IN_SPROUTING_ANGIOGENESIS		16	0.710115	1.74397	0	0.0219124	0.996	1185	tags=38%, list=9%, signal=41%
299	GOBP_POSITIVE_REGULATION_OF_NEURON_DIFFERENTIATION	GOBP_POSITIVE_REGULATION_OF_NEURON_DIFFERENTIATION		82	0.512032	1.74394	0	0.0218431	0.996	3630	tags=45%, list=27%, signal=61%
300	GOBP_CARDIAC_RIGHT_VENTRICLE_MORPHOGENESIS	GOBP_CARDIAC_RIGHT_VENTRICLE_MORPHOGENESIS		16	0.705488	1.74319	0.00334448	0.0219541	0.996	2542	tags=56%, list=19%, signal=69%
301	GOBP_STEM_CELL_DIFFERENTIATION	GOBP_STEM_CELL_DIFFERENTIATION		210	0.458454	1.74234	0	0.022103	0.996	3251	tags=41%, list=24%, signal=53%
302	GOBP_RHYTHMIC_PROCESS	GOBP_RHYTHMIC_PROCESS		231	0.453524	1.74157	0	0.0222782	0.996	2492	tags=30%, list=18%, signal=36%
303	GOBP_INHIBITORY_POSTSYNAPTIC_POTENTIAL	GOBP_INHIBITORY_POSTSYNAPTIC_POTENTIAL		17	0.694346	1.73886	0.003367	0.0230375	0.998	955	tags=18%, list=7%, signal=19%
304	GOBP_NEGATIVE_REGULATION_OF_RHO_PROTEIN_SIGNAL_TRANSDUCTION	GOBP_NEGATIVE_REGULATION_OF_RHO_PROTEIN_SIGNAL_TRANSDUCTION		20	0.669905	1.73838	0.00481541	0.0231204	0.998	1788	tags=55%, list=13%, signal=63%
305	GOBP_STRESS_GRANULE_ASSEMBLY	GOBP_STRESS_GRANULE_ASSEMBLY		25	0.637058	1.73835	0.00156495	0.0230485	0.998	2273	tags=64%, list=17%, signal=77%
306	GOBP_CELLULAR_RESPONSE_TO_PEPTIDE	GOBP_CELLULAR_RESPONSE_TO_PEPTIDE		262	0.444054	1.7383	0	0.0229808	0.998	2815	tags=35%, list=21%, signal=43%
307	GOBP_REGULATION_OF_P38MAPK_CASCADE	GOBP_REGULATION_OF_P38MAPK_CASCADE		38	0.57788	1.73816	0.00155521	0.0229363	0.998	3147	tags=45%, list=23%, signal=58%
308	GOBP_DOSAGE_COMPENSATION	GOBP_DOSAGE_COMPENSATION		31	0.605946	1.73808	0.00612557	0.0228695	0.998	1885	tags=45%, list=14%, signal=52%
309	GOBP_ACTIN_POLYMERIZATION_OR_DEPOLYMERIZATION	GOBP_ACTIN_POLYMERIZATION_OR_DEPOLYMERIZATION		156	0.46367	1.73786	0	0.0228487	0.998	3429	tags=41%, list=25%, signal=54%
310	GOBP_PROTEIN_DEPHOSPHORYLATION	GOBP_PROTEIN_DEPHOSPHORYLATION		222	0.455394	1.73763	0	0.0228583	0.998	2794	tags=35%, list=21%, signal=43%
311	GOBP_CARDIAC_SEPTUM_DEVELOPMENT	GOBP_CARDIAC_SEPTUM_DEVELOPMENT		104	0.495851	1.7374	0	0.0228565	0.998	2655	tags=37%, list=20%, signal=45%
312	GOBP_POSITIVE_REGULATION_OF_SUPRAMOLECULAR_FIBER_ORGANIZATION	GOBP_POSITIVE_REGULATION_OF_SUPRAMOLECULAR_FIBER_ORGANIZATION		154	0.47076	1.7374	0	0.022787	0.998	2769	tags=34%, list=20%, signal=43%
313	GOMF_PROTEIN_PHOSPHATASE_BINDING	GOMF_PROTEIN_PHOSPHATASE_BINDING		156	0.463625	1.73713	0	0.0228115	0.999	3069	tags=41%, list=23%, signal=52%
314	GOBP_REGULATION_OF_CELL_PROJECTION_ASSEMBLY	GOBP_REGULATION_OF_CELL_PROJECTION_ASSEMBLY		170	0.462613	1.73651	0	0.0229627	0.999	2508	tags=31%, list=18%, signal=37%
315	GOBP_ADULT_LOCOMOTORY_BEHAVIOR	GOBP_ADULT_LOCOMOTORY_BEHAVIOR		86	0.506753	1.73631	0	0.0229307	0.999	4038	tags=47%, list=30%, signal=66%
316	GOCC_MICROTUBULE_PLUS_END	GOCC_MICROTUBULE_PLUS_END		24	0.640748	1.73614	0.00482315	0.0229548	0.999	888	tags=33%, list=7%, signal=36%
317	GOBP_LENS_FIBER_CELL_DIFFERENTIATION	GOBP_LENS_FIBER_CELL_DIFFERENTIATION		29	0.602492	1.73379	0.00154799	0.0235441	0.999	1978	tags=38%, list=15%, signal=44%
318	GOBP_NEGATIVE_REGULATION_OF_FAT_CELL_DIFFERENTIATION	GOBP_NEGATIVE_REGULATION_OF_FAT_CELL_DIFFERENTIATION		49	0.55435	1.73331	0.00145773	0.0236362	0.999	2543	tags=43%, list=19%, signal=53%
319	GOBP_SCHWANN_CELL_DIFFERENTIATION	GOBP_SCHWANN_CELL_DIFFERENTIATION		37	0.571634	1.73228	0.00884956	0.023948	0.999	2776	tags=35%, list=20%, signal=44%
320	GOBP_TRANSFORMING_GROWTH_FACTOR_BETA_PRODUCTION	GOBP_TRANSFORMING_GROWTH_FACTOR_BETA_PRODUCTION		32	0.586847	1.73136	0.00313972	0.0241813	0.999	2359	tags=31%, list=17%, signal=38%
321	GOBP_REGULATION_OF_MORPHOGENESIS_OF_A_BRANCHING_STRUCTURE	GOBP_REGULATION_OF_MORPHOGENESIS_OF_A_BRANCHING_STRUCTURE		55	0.53674	1.73111	0	0.0241973	0.999	3394	tags=44%, list=25%, signal=58%
322	GOBP_INTERLEUKIN_4_PRODUCTION	GOBP_INTERLEUKIN_4_PRODUCTION		26	0.619481	1.7309	0.00473934	0.0241839	0.999	2616	tags=46%, list=19%, signal=57%
323	GOMF_GUANYL_NUCLEOTIDE_EXCHANGE_FACTOR_ACTIVITY	GOMF_GUANYL_NUCLEOTIDE_EXCHANGE_FACTOR_ACTIVITY		187	0.456118	1.73077	0	0.0241598	0.999	3159	tags=41%, list=23%, signal=52%
324	GOBP_OUTFLOW_TRACT_MORPHOGENESIS	GOBP_OUTFLOW_TRACT_MORPHOGENESIS		70	0.512935	1.73077	0	0.0240853	0.999	2833	tags=39%, list=21%, signal=48%
325	GOBP_PERIPHERAL_NERVOUS_SYSTEM_DEVELOPMENT	GOBP_PERIPHERAL_NERVOUS_SYSTEM_DEVELOPMENT		63	0.527693	1.73076	0	0.0240148	0.999	4039	tags=44%, list=30%, signal=63%
326	GOBP_MAINTENANCE_OF_BLOOD_BRAIN_BARRIER	GOBP_MAINTENANCE_OF_BLOOD_BRAIN_BARRIER		18	0.663721	1.73036	0.00495868	0.0240457	1	2267	tags=50%, list=17%, signal=60%
327	GOBP_RESPONSE_TO_NITRIC_OXIDE	GOBP_RESPONSE_TO_NITRIC_OXIDE		16	0.691601	1.72983	0.00329489	0.0241838	1	1632	tags=44%, list=12%, signal=50%
328	GOBP_T_HELPER_17_CELL_DIFFERENTIATION	GOBP_T_HELPER_17_CELL_DIFFERENTIATION		21	0.64838	1.72978	0.00479233	0.0241137	1	4103	tags=76%, list=30%, signal=109%
329	GOMF_UBIQUITIN_LIKE_PROTEIN_CONJUGATING_ENZYME_BINDING	GOMF_UBIQUITIN_LIKE_PROTEIN_CONJUGATING_ENZYME_BINDING		37	0.588746	1.72906	0	0.0242474	1	1625	tags=32%, list=12%, signal=37%
330	GOBP_HEART_TRABECULA_MORPHOGENESIS	GOBP_HEART_TRABECULA_MORPHOGENESIS		33	0.59624	1.7288	0.0015015	0.0242592	1	2486	tags=52%, list=18%, signal=63%
331	GOBP_POSITIVE_REGULATION_OF_SMAD_PROTEIN_SIGNAL_TRANSDUCTION	GOBP_POSITIVE_REGULATION_OF_SMAD_PROTEIN_SIGNAL_TRANSDUCTION		17	0.672355	1.72823	0.00620155	0.0243771	1	801	tags=35%, list=6%, signal=37%
332	GOBP_POSITIVE_REGULATION_OF_PROTEIN_LOCALIZATION_TO_MEMBRANE	GOBP_POSITIVE_REGULATION_OF_PROTEIN_LOCALIZATION_TO_MEMBRANE		97	0.491361	1.72819	0	0.0243143	1	2553	tags=34%, list=19%, signal=42%
333	GOBP_AMYLOID_BETA_CLEARANCE	GOBP_AMYLOID_BETA_CLEARANCE		29	0.610186	1.72801	0.00156495	0.0243012	1	2525	tags=48%, list=19%, signal=59%
334	GOBP_NEGATIVE_REGULATION_OF_RESPONSE_TO_WOUNDING	GOBP_NEGATIVE_REGULATION_OF_RESPONSE_TO_WOUNDING		68	0.524232	1.72782	0.00138889	0.0242845	1	3398	tags=40%, list=25%, signal=53%
335	GOMF_PROTEIN_TYROSINE_KINASE_ACTIVITY	GOMF_PROTEIN_TYROSINE_KINASE_ACTIVITY		116	0.485716	1.72772	0	0.0242434	1	2991	tags=41%, list=22%, signal=52%
336	GOBP_NEGATIVE_REGULATION_OF_KINASE_ACTIVITY	GOBP_NEGATIVE_REGULATION_OF_KINASE_ACTIVITY		201	0.454756	1.72754	0	0.0242373	1	3147	tags=41%, list=23%, signal=52%
337	GOMF_MICROTUBULE_PLUS_END_BINDING	GOMF_MICROTUBULE_PLUS_END_BINDING		20	0.646324	1.72704	0.00648298	0.0243462	1	1721	tags=45%, list=13%, signal=51%
338	GOBP_POSITIVE_REGULATION_OF_STRIATED_MUSCLE_CELL_DIFFERENTIATION	GOBP_POSITIVE_REGULATION_OF_STRIATED_MUSCLE_CELL_DIFFERENTIATION		38	0.577233	1.72682	0.00308166	0.0243364	1	1976	tags=37%, list=15%, signal=43%
339	GOCC_INTERMEDIATE_FILAMENT_CYTOSKELETON	GOCC_INTERMEDIATE_FILAMENT_CYTOSKELETON		95	0.494728	1.72661	0	0.0243235	1	3629	tags=45%, list=27%, signal=61%
340	GOBP_REGULATION_OF_MICROTUBULE_DEPOLYMERIZATION	GOBP_REGULATION_OF_MICROTUBULE_DEPOLYMERIZATION		32	0.600599	1.72619	0	0.0243659	1	2365	tags=41%, list=17%, signal=49%
341	GOBP_SPROUTING_ANGIOGENESIS	GOBP_SPROUTING_ANGIOGENESIS		106	0.485018	1.72605	0	0.0243254	1	1442	tags=22%, list=11%, signal=24%
342	GOBP_RESPONSE_TO_HEPATOCYTE_GROWTH_FACTOR	GOBP_RESPONSE_TO_HEPATOCYTE_GROWTH_FACTOR		17	0.708161	1.72594	0.00330033	0.0242884	1	2439	tags=53%, list=18%, signal=64%
343	GOBP_WALKING_BEHAVIOR	GOBP_WALKING_BEHAVIOR		40	0.560579	1.72563	0.00300752	0.0242962	1	3198	tags=38%, list=24%, signal=49%
344	GOCC_SARCOMERE	GOCC_SARCOMERE		141	0.46732	1.72496	0.00126743	0.024454	1	3604	tags=41%, list=27%, signal=55%
345	GOBP_ENDOCRINE_SYSTEM_DEVELOPMENT	GOBP_ENDOCRINE_SYSTEM_DEVELOPMENT		92	0.490992	1.72342	0.00133511	0.0248589	1	3528	tags=46%, list=26%, signal=61%
346	GOMF_PHOSPHATIDYLCHOLINE_TRANSPORTER_ACTIVITY	GOMF_PHOSPHATIDYLCHOLINE_TRANSPORTER_ACTIVITY		18	0.683464	1.72337	0.00331675	0.0248141	1	2258	tags=56%, list=17%, signal=67%
347	GOBP_NEGATIVE_REGULATION_OF_PROTEIN_CONTAINING_COMPLEX_DISASSEMBLY	GOBP_NEGATIVE_REGULATION_OF_PROTEIN_CONTAINING_COMPLEX_DISASSEMBLY		77	0.508551	1.72294	0	0.0248573	1	3780	tags=52%, list=28%, signal=72%
348	GOBP_REGULATION_OF_PROTEIN_POLYMERIZATION	GOBP_REGULATION_OF_PROTEIN_POLYMERIZATION		171	0.4611	1.7226	0	0.0249306	1	3515	tags=40%, list=26%, signal=54%
349	GOBP_NEGATIVE_REGULATION_OF_JNK_CASCADE	GOBP_NEGATIVE_REGULATION_OF_JNK_CASCADE		34	0.578984	1.72162	0.00150602	0.0251147	1	2099	tags=35%, list=15%, signal=42%
350	GOBP_POSITIVE_REGULATION_OF_EPITHELIAL_CELL_MIGRATION	GOBP_POSITIVE_REGULATION_OF_EPITHELIAL_CELL_MIGRATION		143	0.463727	1.72049	0.00126263	0.0254248	1	2185	tags=27%, list=16%, signal=32%
351	GOBP_NEUROTROPHIN_TRK_RECEPTOR_SIGNALING_PATHWAY	GOBP_NEUROTROPHIN_TRK_RECEPTOR_SIGNALING_PATHWAY		31	0.590135	1.72001	0.00462963	0.0254593	1	2724	tags=42%, list=20%, signal=52%
352	GOBP_REGULATION_OF_NEUROBLAST_PROLIFERATION	GOBP_REGULATION_OF_NEUROBLAST_PROLIFERATION		33	0.585471	1.71969	0.00757576	0.02547	1	2091	tags=33%, list=15%, signal=39%
353	GOBP_CALCINEURIN_MEDIATED_SIGNALING	GOBP_CALCINEURIN_MEDIATED_SIGNALING		40	0.57099	1.71945	0.00150602	0.0254743	1	3717	tags=60%, list=27%, signal=82%
354	GOBP_ENDODERM_FORMATION	GOBP_ENDODERM_FORMATION		31	0.594152	1.71903	0.00747384	0.0255448	1	3447	tags=55%, list=25%, signal=73%
355	GOBP_PERICARDIUM_DEVELOPMENT	GOBP_PERICARDIUM_DEVELOPMENT		23	0.628229	1.71894	0.0031746	0.0254961	1	712	tags=30%, list=5%, signal=32%
356	GOMF_CALCIUM_CHANNEL_REGULATOR_ACTIVITY	GOMF_CALCIUM_CHANNEL_REGULATOR_ACTIVITY		31	0.598197	1.71865	0.0015083	0.0255395	1	2679	tags=35%, list=20%, signal=44%
357	GOBP_REGULATION_OF_ORGAN_GROWTH	GOBP_REGULATION_OF_ORGAN_GROWTH		93	0.49235	1.7184	0	0.02557	1	3005	tags=42%, list=22%, signal=53%
358	MP_INCREASED_TUMOR_NECROSIS_FACTOR_SECRETION	MP_INCREASED_TUMOR_NECROSIS_FACTOR_SECRETION		92	0.498872	1.71833	0	0.0255151	1	3147	tags=46%, list=23%, signal=59%
359	GOBP_CELLULAR_RESPONSE_TO_VASCULAR_ENDOTHELIAL_GROWTH_FACTOR_STIMULUS	GOBP_CELLULAR_RESPONSE_TO_VASCULAR_ENDOTHELIAL_GROWTH_FACTOR_STIMULUS		53	0.536282	1.71783	0.00146199	0.0255585	1	3371	tags=47%, list=25%, signal=63%
360	GOBP_CELL_DIFFERENTIATION_INVOLVED_IN_KIDNEY_DEVELOPMENT	GOBP_CELL_DIFFERENTIATION_INVOLVED_IN_KIDNEY_DEVELOPMENT		44	0.55024	1.71748	0	0.0255853	1	2833	tags=43%, list=21%, signal=54%
361	GOBP_BIOMINERALIZATION	GOBP_BIOMINERALIZATION		135	0.46746	1.71693	0	0.0257032	1	2991	tags=34%, list=22%, signal=43%
362	GOMF_PROTEIN_TYROSINE_KINASE_BINDING	GOMF_PROTEIN_TYROSINE_KINASE_BINDING		101	0.482174	1.71655	0	0.025739	1	1829	tags=29%, list=13%, signal=33%
363	GOBP_INSULIN_RECEPTOR_SIGNALING_PATHWAY	GOBP_INSULIN_RECEPTOR_SIGNALING_PATHWAY		104	0.484483	1.71631	0	0.0257489	1	3835	tags=53%, list=28%, signal=73%
364	GOBP_NEGATIVE_REGULATION_OF_AXONOGENESIS	GOBP_NEGATIVE_REGULATION_OF_AXONOGENESIS		62	0.524149	1.71599	0.00135685	0.025778	1	2319	tags=32%, list=17%, signal=39%
365	GOBP_DENDRITE_DEVELOPMENT	GOBP_DENDRITE_DEVELOPMENT		273	0.437421	1.71579	0	0.0257846	1	3103	tags=34%, list=23%, signal=43%
366	GOBP_EPIGENETIC_REGULATION_OF_GENE_EXPRESSION	GOBP_EPIGENETIC_REGULATION_OF_GENE_EXPRESSION		135	0.467017	1.71547	0	0.0258166	1	2093	tags=36%, list=15%, signal=42%
367	GOBP_SENSORY_SYSTEM_DEVELOPMENT	GOBP_SENSORY_SYSTEM_DEVELOPMENT		291	0.435336	1.71501	0	0.0258905	1	3253	tags=39%, list=24%, signal=50%
368	GOBP_POSITIVE_REGULATION_OF_MACROAUTOPHAGY	GOBP_POSITIVE_REGULATION_OF_MACROAUTOPHAGY		67	0.514746	1.71472	0.00274725	0.025919	1	2595	tags=36%, list=19%, signal=44%
369	GOBP_NEPHRON_EPITHELIUM_DEVELOPMENT	GOBP_NEPHRON_EPITHELIUM_DEVELOPMENT		90	0.493705	1.71469	0	0.0258647	1	2833	tags=37%, list=21%, signal=46%
370	GOBP_PROTEIN_LOCALIZATION_TO_NUCLEUS	GOBP_PROTEIN_LOCALIZATION_TO_NUCLEUS		282	0.436465	1.71426	0	0.0259501	1	2530	tags=34%, list=19%, signal=41%
371	GOBP_MALE_SEX_DIFFERENTIATION	GOBP_MALE_SEX_DIFFERENTIATION		103	0.483952	1.71406	0	0.0259436	1	1948	tags=28%, list=14%, signal=33%
372	GOBP_REGULATION_OF_VOLTAGE_GATED_CALCIUM_CHANNEL_ACTIVITY	GOBP_REGULATION_OF_VOLTAGE_GATED_CALCIUM_CHANNEL_ACTIVITY		33	0.578747	1.71348	0.00748503	0.0260664	1	3717	tags=52%, list=27%, signal=71%
373	GOBP_VENTRICULAR_CARDIAC_MUSCLE_TISSUE_DEVELOPMENT	GOBP_VENTRICULAR_CARDIAC_MUSCLE_TISSUE_DEVELOPMENT		46	0.552866	1.71145	0	0.0266575	1	2542	tags=39%, list=19%, signal=48%
374	GOBP_PROTEASOME_MEDIATED_UBIQUITIN_DEPENDENT_PROTEIN_CATABOLIC_PROCESS	GOBP_PROTEASOME_MEDIATED_UBIQUITIN_DEPENDENT_PROTEIN_CATABOLIC_PROCESS		382	0.42476	1.71122	0	0.0266711	1	3086	tags=35%, list=23%, signal=44%
375	GOBP_CELL_MIGRATION_IN_HINDBRAIN	GOBP_CELL_MIGRATION_IN_HINDBRAIN		20	0.643254	1.71108	0.00775194	0.0266374	1	3709	tags=65%, list=27%, signal=89%
376	GOBP_NEGATIVE_REGULATION_OF_NEURON_PROJECTION_DEVELOPMENT	GOBP_NEGATIVE_REGULATION_OF_NEURON_PROJECTION_DEVELOPMENT		144	0.462224	1.71069	0	0.0266666	1	3845	tags=40%, list=28%, signal=56%
377	GOBP_REGULATION_OF_RHO_PROTEIN_SIGNAL_TRANSDUCTION	GOBP_REGULATION_OF_RHO_PROTEIN_SIGNAL_TRANSDUCTION		73	0.504921	1.71063	0	0.0266238	1	3202	tags=42%, list=24%, signal=55%
378	GOCC_CONTRACTILE_FIBER	GOCC_CONTRACTILE_FIBER		167	0.453537	1.70957	0	0.0268513	1	3604	tags=41%, list=27%, signal=55%
379	GOBP_NEGATIVE_REGULATION_OF_PHOSPHORUS_METABOLIC_PROCESS	GOBP_NEGATIVE_REGULATION_OF_PHOSPHORUS_METABOLIC_PROCESS		386	0.425091	1.70933	0	0.0268763	1	2895	tags=34%, list=21%, signal=43%
380	GOMF_FRIZZLED_BINDING	GOMF_FRIZZLED_BINDING		27	0.606992	1.709	0.003125	0.026917	1	1712	tags=37%, list=13%, signal=42%
381	GOMF_CHAPERONE_BINDING	GOMF_CHAPERONE_BINDING		92	0.493745	1.70895	0	0.0268679	1	1753	tags=27%, list=13%, signal=31%
382	GOBP_NEGATIVE_REGULATION_OF_PHOSPHORYLATION	GOBP_NEGATIVE_REGULATION_OF_PHOSPHORYLATION		335	0.430093	1.70887	0	0.0268161	1	3012	tags=36%, list=22%, signal=45%
383	GOBP_REGULATION_OF_NEURON_PROJECTION_DEVELOPMENT	GOBP_REGULATION_OF_NEURON_PROJECTION_DEVELOPMENT		478	0.420734	1.70845	0	0.0268502	1	3115	tags=32%, list=23%, signal=40%
384	GOMF_STEROL_TRANSFER_ACTIVITY	GOMF_STEROL_TRANSFER_ACTIVITY		18	0.654057	1.70829	0.00990099	0.0268597	1	3768	tags=61%, list=28%, signal=84%
385	GOBP_EMBRYONIC_ORGAN_DEVELOPMENT	GOBP_EMBRYONIC_ORGAN_DEVELOPMENT		391	0.427366	1.70791	0	0.0268903	1	3448	tags=38%, list=25%, signal=49%
386	GOMF_DISORDERED_DOMAIN_SPECIFIC_BINDING	GOMF_DISORDERED_DOMAIN_SPECIFIC_BINDING		34	0.582424	1.70788	0.00735294	0.0268267	1	2529	tags=50%, list=19%, signal=61%
387	GOBP_NEGATIVE_REGULATION_OF_ENDOTHELIAL_CELL_MIGRATION	GOBP_NEGATIVE_REGULATION_OF_ENDOTHELIAL_CELL_MIGRATION		48	0.543146	1.70782	0.00301205	0.0267635	1	3335	tags=42%, list=25%, signal=55%
388	GOMF_CHEMOREPELLENT_ACTIVITY	GOMF_CHEMOREPELLENT_ACTIVITY		29	0.596367	1.70771	0.0015674	0.0267279	1	2319	tags=38%, list=17%, signal=46%
389	GOBP_ACTIN_CYTOSKELETON_REORGANIZATION	GOBP_ACTIN_CYTOSKELETON_REORGANIZATION		102	0.480993	1.70689	0	0.0269304	1	2931	tags=33%, list=22%, signal=42%
390	GOMF_GROWTH_FACTOR_RECEPTOR_BINDING	GOMF_GROWTH_FACTOR_RECEPTOR_BINDING		110	0.482067	1.70679	0	0.0268976	1	3480	tags=39%, list=26%, signal=52%
391	GOBP_NEGATIVE_REGULATION_OF_CHEMOTAXIS	GOBP_NEGATIVE_REGULATION_OF_CHEMOTAXIS		50	0.537357	1.70577	0	0.0271954	1	3204	tags=46%, list=24%, signal=60%
392	GOBP_UROGENITAL_SYSTEM_DEVELOPMENT	GOBP_UROGENITAL_SYSTEM_DEVELOPMENT		303	0.432437	1.70561	0	0.02718	1	3252	tags=35%, list=24%, signal=45%
393	GOBP_GLANDULAR_EPITHELIAL_CELL_DIFFERENTIATION	GOBP_GLANDULAR_EPITHELIAL_CELL_DIFFERENTIATION		60	0.520788	1.70558	0	0.0271168	1	2534	tags=35%, list=19%, signal=43%
394	GOBP_SYNAPTIC_VESICLE_EXOCYTOSIS	GOBP_SYNAPTIC_VESICLE_EXOCYTOSIS		111	0.478778	1.70551	0	0.0270778	1	3197	tags=33%, list=24%, signal=43%
395	GOBP_REGULATION_OF_ESTABLISHMENT_OF_PROTEIN_LOCALIZATION_TO_MITOCHONDRION	GOBP_REGULATION_OF_ESTABLISHMENT_OF_PROTEIN_LOCALIZATION_TO_MITOCHONDRION		21	0.637232	1.70503	0.00794913	0.027155	1	569	tags=24%, list=4%, signal=25%
396	GOBP_REGULATION_OF_PEPTIDYL_SERINE_PHOSPHORYLATION	GOBP_REGULATION_OF_PEPTIDYL_SERINE_PHOSPHORYLATION		115	0.479307	1.70503	0	0.0270864	1	2316	tags=28%, list=17%, signal=33%
397	GOBP_VENTRICULAR_CARDIAC_MUSCLE_TISSUE_MORPHOGENESIS	GOBP_VENTRICULAR_CARDIAC_MUSCLE_TISSUE_MORPHOGENESIS		39	0.571087	1.70487	0.00146199	0.0270861	1	2542	tags=41%, list=19%, signal=50%
398	GOBP_REGULATION_OF_SKELETAL_MUSCLE_CELL_DIFFERENTIATION	GOBP_REGULATION_OF_SKELETAL_MUSCLE_CELL_DIFFERENTIATION		19	0.67391	1.70449	0.00813008	0.027189	1	1980	tags=53%, list=15%, signal=62%
399	GOBP_NEGATIVE_REGULATION_OF_MUSCLE_CELL_DIFFERENTIATION	GOBP_NEGATIVE_REGULATION_OF_MUSCLE_CELL_DIFFERENTIATION		56	0.522867	1.70373	0.00282486	0.027359	1	2768	tags=38%, list=20%, signal=47%
400	GOBP_MYOTUBE_DIFFERENTIATION	GOBP_MYOTUBE_DIFFERENTIATION		94	0.490486	1.70333	0	0.0273932	1	2647	tags=37%, list=20%, signal=46%
401	GOMF_SH2_DOMAIN_BINDING	GOMF_SH2_DOMAIN_BINDING		39	0.568928	1.70307	0.00881057	0.0274039	1	2991	tags=44%, list=22%, signal=56%
402	GOBP_SERTOLI_CELL_DIFFERENTIATION	GOBP_SERTOLI_CELL_DIFFERENTIATION		20	0.649437	1.70288	0.0116086	0.0274144	1	2989	tags=45%, list=22%, signal=58%
403	GOBP_REGULATION_OF_CARTILAGE_DEVELOPMENT	GOBP_REGULATION_OF_CARTILAGE_DEVELOPMENT		59	0.518042	1.70282	0.00441176	0.0273667	1	1547	tags=19%, list=11%, signal=21%
404	GOBP_RUFFLE_ASSEMBLY	GOBP_RUFFLE_ASSEMBLY		39	0.563506	1.70274	0.00608828	0.0273164	1	2353	tags=38%, list=17%, signal=46%
405	GOBP_POSITIVE_REGULATION_OF_MIRNA_METABOLIC_PROCESS	GOBP_POSITIVE_REGULATION_OF_MIRNA_METABOLIC_PROCESS		48	0.543434	1.70168	0.00441826	0.0276026	1	2282	tags=42%, list=17%, signal=50%
406	GOBP_MESONEPHROS_DEVELOPMENT	GOBP_MESONEPHROS_DEVELOPMENT		89	0.491286	1.70156	0	0.0275808	1	3070	tags=39%, list=23%, signal=50%
407	GOBP_POSTSYNAPSE_TO_NUCLEUS_SIGNALING_PATHWAY	GOBP_POSTSYNAPSE_TO_NUCLEUS_SIGNALING_PATHWAY		15	0.700242	1.70122	0.00511945	0.0276455	1	1762	tags=47%, list=13%, signal=54%
408	GOBP_REPRODUCTIVE_SYSTEM_DEVELOPMENT	GOBP_REPRODUCTIVE_SYSTEM_DEVELOPMENT		220	0.441495	1.70098	0	0.0276523	1	3005	tags=35%, list=22%, signal=44%
409	GOBP_RESPONSE_TO_PLATELET_DERIVED_GROWTH_FACTOR	GOBP_RESPONSE_TO_PLATELET_DERIVED_GROWTH_FACTOR		20	0.664241	1.70084	0.01	0.0276218	1	3343	tags=65%, list=25%, signal=86%
410	GOBP_MICROTUBULE_DEPOLYMERIZATION	GOBP_MICROTUBULE_DEPOLYMERIZATION		46	0.54144	1.70034	0.00736377	0.0277689	1	2557	tags=39%, list=19%, signal=48%
411	GOBP_HAIR_CYCLE_PHASE	GOBP_HAIR_CYCLE_PHASE		15	0.691262	1.69997	0.00164745	0.0278211	1	1306	tags=33%, list=10%, signal=37%
412	GOBP_REGULATION_OF_HEART_GROWTH	GOBP_REGULATION_OF_HEART_GROWTH		70	0.509614	1.69969	0.00139082	0.0278332	1	2833	tags=43%, list=21%, signal=54%
413	GOBP_ASTROCYTE_DIFFERENTIATION	GOBP_ASTROCYTE_DIFFERENTIATION		65	0.514293	1.69935	0.00139665	0.0278768	1	2525	tags=40%, list=19%, signal=49%
414	GOBP_DEPHOSPHORYLATION	GOBP_DEPHOSPHORYLATION		294	0.430182	1.69921	0	0.027849	1	2833	tags=33%, list=21%, signal=41%
415	GOCC_CELL_LEADING_EDGE	GOCC_CELL_LEADING_EDGE		352	0.426484	1.69883	0	0.0278811	1	3447	tags=37%, list=25%, signal=48%
416	GOBP_TELENCEPHALON_DEVELOPMENT	GOBP_TELENCEPHALON_DEVELOPMENT		194	0.446126	1.69883	0	0.027814	1	3070	tags=34%, list=23%, signal=43%
417	GOBP_NEGATIVE_REGULATION_OF_CANONICAL_WNT_SIGNALING_PATHWAY	GOBP_NEGATIVE_REGULATION_OF_CANONICAL_WNT_SIGNALING_PATHWAY		115	0.473856	1.69869	0	0.027784	1	2984	tags=36%, list=22%, signal=45%
418	GOMF_DEUBIQUITINASE_ACTIVITY	GOMF_DEUBIQUITINASE_ACTIVITY		77	0.496367	1.69845	0	0.0277849	1	3071	tags=49%, list=23%, signal=63%
419	GOBP_POSITIVE_REGULATION_OF_PROTEIN_MODIFICATION_BY_SMALL_PROTEIN_CONJUGATION_OR_REMOVAL	GOBP_POSITIVE_REGULATION_OF_PROTEIN_MODIFICATION_BY_SMALL_PROTEIN_CONJUGATION_OR_REMOVAL		128	0.467313	1.69825	0.00128535	0.0277914	1	2772	tags=34%, list=20%, signal=43%
420	GOBP_REGULATION_OF_RESPONSE_TO_WOUNDING	GOBP_REGULATION_OF_RESPONSE_TO_WOUNDING		135	0.460072	1.69802	0	0.0277979	1	3510	tags=39%, list=26%, signal=51%
421	GOBP_POSITIVE_REGULATION_OF_PROTEIN_KINASE_ACTIVITY	GOBP_POSITIVE_REGULATION_OF_PROTEIN_KINASE_ACTIVITY		302	0.428715	1.69736	0	0.0279517	1	3450	tags=38%, list=25%, signal=50%
422	GOBP_REGULATION_OF_SMAD_PROTEIN_SIGNAL_TRANSDUCTION	GOBP_REGULATION_OF_SMAD_PROTEIN_SIGNAL_TRANSDUCTION		27	0.608505	1.6973	0.0075188	0.0279077	1	3416	tags=59%, list=25%, signal=79%
423	GOCC_POSTSYNAPTIC_SPECIALIZATION_INTRACELLULAR_COMPONENT	GOCC_POSTSYNAPTIC_SPECIALIZATION_INTRACELLULAR_COMPONENT		36	0.583636	1.69711	0.00310078	0.0279137	1	3289	tags=47%, list=24%, signal=62%
424	GOCC_PHAGOPHORE_ASSEMBLY_SITE	GOCC_PHAGOPHORE_ASSEMBLY_SITE		30	0.584437	1.6967	0.00763359	0.0280028	1	3064	tags=43%, list=23%, signal=56%
425	GOBP_CONNECTIVE_TISSUE_DEVELOPMENT	GOBP_CONNECTIVE_TISSUE_DEVELOPMENT		229	0.437704	1.69557	0	0.028274	1	3547	tags=35%, list=26%, signal=47%
426	GOBP_NEGATIVE_REGULATION_OF_MRNA_METABOLIC_PROCESS	GOBP_NEGATIVE_REGULATION_OF_MRNA_METABOLIC_PROCESS		85	0.488546	1.69537	0.00132979	0.0282681	1	2954	tags=40%, list=22%, signal=51%
427	GOBP_POSITIVE_REGULATION_OF_OXIDATIVE_STRESS_INDUCED_CELL_DEATH	GOBP_POSITIVE_REGULATION_OF_OXIDATIVE_STRESS_INDUCED_CELL_DEATH		19	0.660086	1.69533	0.00792393	0.0282183	1	1694	tags=42%, list=12%, signal=48%
428	GOBP_BLOOD_VESSEL_ENDOTHELIAL_CELL_PROLIFERATION_INVOLVED_IN_SPROUTING_ANGIOGENESIS	GOBP_BLOOD_VESSEL_ENDOTHELIAL_CELL_PROLIFERATION_INVOLVED_IN_SPROUTING_ANGIOGENESIS		18	0.646661	1.69475	0.0100671	0.0283275	1	1013	tags=33%, list=7%, signal=36%
429	GOBP_NEGATIVE_REGULATION_OF_NIK_NF_KAPPAB_SIGNALING	GOBP_NEGATIVE_REGULATION_OF_NIK_NF_KAPPAB_SIGNALING		21	0.63186	1.69466	0.00492611	0.0282968	1	1726	tags=43%, list=13%, signal=49%
430	GOCC_POSTSYNAPTIC_DENSITY_INTRACELLULAR_COMPONENT	GOCC_POSTSYNAPTIC_DENSITY_INTRACELLULAR_COMPONENT		30	0.589098	1.69372	0.00156986	0.0285855	1	3220	tags=47%, list=24%, signal=61%
431	GOBP_NEUROBLAST_PROLIFERATION	GOBP_NEUROBLAST_PROLIFERATION		57	0.525434	1.69362	0.00294985	0.0285599	1	2091	tags=33%, list=15%, signal=39%
432	GOBP_POSITIVE_REGULATION_OF_CELLULAR_COMPONENT_BIOGENESIS	GOBP_POSITIVE_REGULATION_OF_CELLULAR_COMPONENT_BIOGENESIS		436	0.416748	1.69321	0	0.0286403	1	2508	tags=30%, list=18%, signal=35%
433	GOBP_POSITIVE_REGULATION_OF_HORMONE_SECRETION	GOBP_POSITIVE_REGULATION_OF_HORMONE_SECRETION		119	0.4681	1.69311	0	0.0286121	1	3614	tags=40%, list=27%, signal=54%
434	GOBP_DEMETHYLATION	GOBP_DEMETHYLATION		54	0.534558	1.69286	0	0.0286703	1	2209	tags=41%, list=16%, signal=48%
435	GOMF_JUN_KINASE_BINDING	GOMF_JUN_KINASE_BINDING		16	0.668586	1.69231	0.0016129	0.0287607	1	1391	tags=38%, list=10%, signal=42%
436	GOBP_LABYRINTHINE_LAYER_DEVELOPMENT	GOBP_LABYRINTHINE_LAYER_DEVELOPMENT		48	0.534923	1.69202	0.00440529	0.028818	1	2512	tags=35%, list=19%, signal=43%
437	GOBP_CLATHRIN_DEPENDENT_ENDOCYTOSIS	GOBP_CLATHRIN_DEPENDENT_ENDOCYTOSIS		42	0.551272	1.69192	0.00597015	0.0287842	1	3333	tags=50%, list=25%, signal=66%
438	GOBP_REGULATION_OF_CARDIAC_MUSCLE_CELL_PROLIFERATION	GOBP_REGULATION_OF_CARDIAC_MUSCLE_CELL_PROLIFERATION		40	0.562283	1.69083	0.00607903	0.0291278	1	2991	tags=52%, list=22%, signal=67%
439	GOBP_SUBSTRATE_ADHESION_DEPENDENT_CELL_SPREADING	GOBP_SUBSTRATE_ADHESION_DEPENDENT_CELL_SPREADING		99	0.482736	1.69072	0.00128866	0.0290909	1	3500	tags=37%, list=26%, signal=50%
440	GOMF_RECEPTOR_TYROSINE_KINASE_BINDING	GOMF_RECEPTOR_TYROSINE_KINASE_BINDING		67	0.508509	1.69046	0.00140647	0.0291369	1	1829	tags=31%, list=13%, signal=36%
441	GOBP_MESENCHYMAL_CELL_MIGRATION	GOBP_MESENCHYMAL_CELL_MIGRATION		57	0.516298	1.69032	0.00430416	0.0291398	1	3249	tags=40%, list=24%, signal=53%
442	GOBP_POSITIVE_REGULATION_OF_WNT_SIGNALING_PATHWAY	GOBP_POSITIVE_REGULATION_OF_WNT_SIGNALING_PATHWAY		118	0.464984	1.68976	0	0.0292542	1	2895	tags=36%, list=21%, signal=46%
443	GOBP_ARTERY_DEVELOPMENT	GOBP_ARTERY_DEVELOPMENT		94	0.483821	1.68962	0	0.0292358	1	2525	tags=34%, list=19%, signal=42%
444	GOBP_TELENCEPHALON_GLIAL_CELL_MIGRATION	GOBP_TELENCEPHALON_GLIAL_CELL_MIGRATION		22	0.633634	1.68954	0.00955414	0.0291964	1	1145	tags=23%, list=8%, signal=25%
445	GOCC_CELL_CELL_JUNCTION	GOCC_CELL_CELL_JUNCTION		405	0.420686	1.68938	0	0.0291914	1	2898	tags=30%, list=21%, signal=37%
446	GOMF_UBIQUITIN_LIKE_PROTEIN_TRANSFERASE_ACTIVITY	GOMF_UBIQUITIN_LIKE_PROTEIN_TRANSFERASE_ACTIVITY		358	0.422285	1.68917	0	0.0291917	1	2366	tags=31%, list=17%, signal=36%
447	GOCC_ADHERENS_JUNCTION	GOCC_ADHERENS_JUNCTION		117	0.473228	1.689	0.00273224	0.0291865	1	3072	tags=39%, list=23%, signal=50%
448	MP_INCREASED_LEUKEMIA_INCIDENCE	MP_INCREASED_LEUKEMIA_INCIDENCE		39	0.549065	1.68885	0.00455927	0.0291789	1	2926	tags=49%, list=22%, signal=62%
449	GOBP_DENDRITIC_SPINE_DEVELOPMENT	GOBP_DENDRITIC_SPINE_DEVELOPMENT		119	0.468011	1.68815	0.00128535	0.0293464	1	3074	tags=36%, list=23%, signal=46%
450	GOMF_UBIQUITIN_LIKE_PROTEIN_LIGASE_ACTIVITY	GOMF_UBIQUITIN_LIKE_PROTEIN_LIGASE_ACTIVITY		274	0.431086	1.68768	0	0.0294691	1	1950	tags=27%, list=14%, signal=31%
451	GOBP_CELLULAR_RESPONSE_TO_INSULIN_STIMULUS	GOBP_CELLULAR_RESPONSE_TO_INSULIN_STIMULUS		172	0.451042	1.6875	0	0.0294659	1	3835	tags=46%, list=28%, signal=63%
452	GOBP_REGULATION_OF_WNT_SIGNALING_PATHWAY_PLANAR_CELL_POLARITY_PATHWAY	GOBP_REGULATION_OF_WNT_SIGNALING_PATHWAY_PLANAR_CELL_POLARITY_PATHWAY		15	0.694996	1.68645	0.00343053	0.0297617	1	830	tags=33%, list=6%, signal=35%
453	GOBP_NEGATIVE_REGULATION_OF_CELL_CELL_ADHESION	GOBP_NEGATIVE_REGULATION_OF_CELL_CELL_ADHESION		157	0.456607	1.68552	0	0.0300404	1	3451	tags=41%, list=25%, signal=55%
454	GOBP_REGULATION_OF_PROTEIN_LOCALIZATION_TO_NUCLEUS	GOBP_REGULATION_OF_PROTEIN_LOCALIZATION_TO_NUCLEUS		133	0.45955	1.68299	0	0.0308761	1	2484	tags=35%, list=18%, signal=42%
455	GOBP_NEGATIVE_REGULATION_OF_STEM_CELL_POPULATION_MAINTENANCE	GOBP_NEGATIVE_REGULATION_OF_STEM_CELL_POPULATION_MAINTENANCE		22	0.628678	1.68279	0.00484653	0.0308725	1	2725	tags=50%, list=20%, signal=62%
456	GOBP_PROTEIN_KINASE_B_SIGNALING	GOBP_PROTEIN_KINASE_B_SIGNALING		163	0.452257	1.68255	0	0.0309024	1	2991	tags=35%, list=22%, signal=44%
457	GOBP_REGULATION_OF_PHOSPHOPROTEIN_PHOSPHATASE_ACTIVITY	GOBP_REGULATION_OF_PHOSPHOPROTEIN_PHOSPHATASE_ACTIVITY		53	0.520867	1.68191	0.00444444	0.0310635	1	2679	tags=38%, list=20%, signal=47%
458	GOBP_NEURAL_TUBE_DEVELOPMENT	GOBP_NEURAL_TUBE_DEVELOPMENT		166	0.447883	1.68171	0	0.0311007	1	2487	tags=31%, list=18%, signal=38%
459	GOBP_POSITIVE_REGULATION_OF_TRANSCRIPTION_FROM_RNA_POLYMERASE_II_PROMOTER_IN_RESPONSE_TO_STRESS	GOBP_POSITIVE_REGULATION_OF_TRANSCRIPTION_FROM_RNA_POLYMERASE_II_PROMOTER_IN_RESPONSE_TO_STRESS		26	0.610069	1.68053	0.0108025	0.0314876	1	928	tags=38%, list=7%, signal=41%
460	GOBP_POSITIVE_REGULATION_OF_KINASE_ACTIVITY	GOBP_POSITIVE_REGULATION_OF_KINASE_ACTIVITY		360	0.418738	1.6803	0	0.0314804	1	3522	tags=38%, list=26%, signal=49%
461	GOBP_REGULATION_OF_RESPONSE_TO_REACTIVE_OXYGEN_SPECIES	GOBP_REGULATION_OF_RESPONSE_TO_REACTIVE_OXYGEN_SPECIES		38	0.561771	1.6795	0.00449775	0.0317068	1	1770	tags=32%, list=13%, signal=36%
462	GOBP_POSITIVE_REGULATION_OF_MUSCLE_CELL_DIFFERENTIATION	GOBP_POSITIVE_REGULATION_OF_MUSCLE_CELL_DIFFERENTIATION		59	0.520264	1.67872	0.00421941	0.0319277	1	2050	tags=29%, list=15%, signal=34%
463	GOBP_POSITIVE_REGULATION_OF_INTRINSIC_APOPTOTIC_SIGNALING_PATHWAY	GOBP_POSITIVE_REGULATION_OF_INTRINSIC_APOPTOTIC_SIGNALING_PATHWAY		57	0.528047	1.67861	0.00430416	0.0318842	1	3005	tags=39%, list=22%, signal=49%
464	GOBP_INTERMEDIATE_FILAMENT_BASED_PROCESS	GOBP_INTERMEDIATE_FILAMENT_BASED_PROCESS		51	0.530914	1.678	0	0.0320127	1	4322	tags=63%, list=32%, signal=92%
465	GOBP_POSITIVE_REGULATION_OF_PHOSPHOPROTEIN_PHOSPHATASE_ACTIVITY	GOBP_POSITIVE_REGULATION_OF_PHOSPHOPROTEIN_PHOSPHATASE_ACTIVITY		21	0.632663	1.67791	0.00326264	0.031969	1	2670	tags=52%, list=20%, signal=65%
466	GOMF_TRANSFORMING_GROWTH_FACTOR_BETA_BINDING	GOMF_TRANSFORMING_GROWTH_FACTOR_BETA_BINDING		22	0.623821	1.67785	0.00493421	0.0319407	1	1205	tags=27%, list=9%, signal=30%
467	GOCC_DISTAL_AXON	GOCC_DISTAL_AXON		301	0.424905	1.67738	0	0.0320607	1	3851	tags=37%, list=28%, signal=51%
468	GOBP_CELL_DIFFERENTIATION_IN_HINDBRAIN	GOBP_CELL_DIFFERENTIATION_IN_HINDBRAIN		25	0.606675	1.67716	0.00759878	0.0320623	1	2576	tags=36%, list=19%, signal=44%
469	GOBP_REGULATION_OF_PLATELET_DERIVED_GROWTH_FACTOR_RECEPTOR_SIGNALING_PATHWAY	GOBP_REGULATION_OF_PLATELET_DERIVED_GROWTH_FACTOR_RECEPTOR_SIGNALING_PATHWAY		20	0.632584	1.67627	0.00958466	0.0323444	1	3051	tags=60%, list=22%, signal=77%
470	GOBP_SMOOTH_MUSCLE_CELL_APOPTOTIC_PROCESS	GOBP_SMOOTH_MUSCLE_CELL_APOPTOTIC_PROCESS		23	0.633174	1.67624	0.00811688	0.032283	1	1046	tags=30%, list=8%, signal=33%
471	GOBP_REGULATION_OF_RECEPTOR_MEDIATED_ENDOCYTOSIS	GOBP_REGULATION_OF_RECEPTOR_MEDIATED_ENDOCYTOSIS		106	0.476888	1.67617	0	0.0322494	1	2775	tags=30%, list=20%, signal=38%
472	GOBP_NEGATIVE_REGULATION_OF_NERVOUS_SYSTEM_DEVELOPMENT	GOBP_NEGATIVE_REGULATION_OF_NERVOUS_SYSTEM_DEVELOPMENT		142	0.448239	1.67567	0	0.0323647	1	3007	tags=35%, list=22%, signal=45%
473	GOBP_POSITIVE_REGULATION_OF_SODIUM_ION_TRANSMEMBRANE_TRANSPORTER_ACTIVITY	GOBP_POSITIVE_REGULATION_OF_SODIUM_ION_TRANSMEMBRANE_TRANSPORTER_ACTIVITY		16	0.653068	1.67546	0.0145631	0.0323653	1	3141	tags=63%, list=23%, signal=81%
474	GOBP_T_CELL_DIFFERENTIATION_INVOLVED_IN_IMMUNE_RESPONSE	GOBP_T_CELL_DIFFERENTIATION_INVOLVED_IN_IMMUNE_RESPONSE		56	0.518209	1.67515	0.0014556	0.0324329	1	2628	tags=38%, list=19%, signal=46%
475	GOBP_CELL_FATE_COMMITMENT_INVOLVED_IN_FORMATION_OF_PRIMARY_GERM_LAYER	GOBP_CELL_FATE_COMMITMENT_INVOLVED_IN_FORMATION_OF_PRIMARY_GERM_LAYER		19	0.647034	1.67432	0.0110759	0.0327052	1	2991	tags=58%, list=22%, signal=74%
476	GOMF_ACTININ_BINDING	GOMF_ACTININ_BINDING		31	0.583857	1.67358	0.00306748	0.0329344	1	3072	tags=48%, list=23%, signal=62%
477	GOBP_HEART_GROWTH	GOBP_HEART_GROWTH		94	0.481672	1.67338	0	0.0329684	1	2833	tags=43%, list=21%, signal=53%
478	GOBP_P38MAPK_CASCADE	GOBP_P38MAPK_CASCADE		49	0.535643	1.67184	0.00146199	0.0334904	1	3147	tags=43%, list=23%, signal=56%
479	GOBP_MEGAKARYOCYTE_DIFFERENTIATION	GOBP_MEGAKARYOCYTE_DIFFERENTIATION		38	0.545079	1.67177	0.00610687	0.0334596	1	2841	tags=47%, list=21%, signal=60%
480	GOBP_PROTEIN_DEPOLYMERIZATION	GOBP_PROTEIN_DEPOLYMERIZATION		107	0.471757	1.67116	0	0.0336101	1	3429	tags=42%, list=25%, signal=56%
481	GOMF_APOLIPOPROTEIN_BINDING	GOMF_APOLIPOPROTEIN_BINDING		15	0.68138	1.67099	0.00649351	0.0335867	1	3188	tags=60%, list=23%, signal=78%
482	GOBP_CARTILAGE_DEVELOPMENT	GOBP_CARTILAGE_DEVELOPMENT		167	0.447986	1.67072	0	0.0336093	1	2282	tags=23%, list=17%, signal=28%
483	GOBP_POSITIVE_REGULATION_OF_MUSCLE_CELL_APOPTOTIC_PROCESS	GOBP_POSITIVE_REGULATION_OF_MUSCLE_CELL_APOPTOTIC_PROCESS		29	0.579276	1.67023	0.00313972	0.0337148	1	1984	tags=34%, list=15%, signal=40%
484	GOBP_POSITIVE_REGULATION_OF_EXTRACELLULAR_MATRIX_ORGANIZATION	GOBP_POSITIVE_REGULATION_OF_EXTRACELLULAR_MATRIX_ORGANIZATION		25	0.601161	1.66991	0.0110759	0.0337833	1	2529	tags=44%, list=19%, signal=54%
485	GOBP_NEGATIVE_REGULATION_OF_TOR_SIGNALING	GOBP_NEGATIVE_REGULATION_OF_TOR_SIGNALING		37	0.56295	1.66982	0.00456621	0.0337403	1	2354	tags=43%, list=17%, signal=52%
486	GOMF_PROTEIN_DEMETHYLASE_ACTIVITY	GOMF_PROTEIN_DEMETHYLASE_ACTIVITY		25	0.605318	1.66917	0.00476191	0.0339339	1	2758	tags=56%, list=20%, signal=70%
487	GOBP_REGULATION_OF_CALCINEURIN_MEDIATED_SIGNALING	GOBP_REGULATION_OF_CALCINEURIN_MEDIATED_SIGNALING		34	0.563615	1.6687	0.00736377	0.0340517	1	3279	tags=53%, list=24%, signal=70%
488	GOBP_REGULATION_OF_NEURON_MIGRATION	GOBP_REGULATION_OF_NEURON_MIGRATION		46	0.538751	1.66784	0	0.0343713	1	1762	tags=24%, list=13%, signal=27%
489	GOMF_UBIQUITIN_LIKE_PROTEIN_PEPTIDASE_ACTIVITY	GOMF_UBIQUITIN_LIKE_PROTEIN_PEPTIDASE_ACTIVITY		90	0.48425	1.66735	0	0.0344859	1	3071	tags=46%, list=23%, signal=58%
490	GOBP_REGULATION_OF_CELL_SIZE	GOBP_REGULATION_OF_CELL_SIZE		180	0.440373	1.66725	0	0.0344682	1	3219	tags=38%, list=24%, signal=50%
491	GOBP_REGULATION_OF_INTERLEUKIN_4_PRODUCTION	GOBP_REGULATION_OF_INTERLEUKIN_4_PRODUCTION		21	0.630154	1.66716	0.0112179	0.0344291	1	2616	tags=48%, list=19%, signal=59%
492	GOBP_EXIT_FROM_MITOSIS	GOBP_EXIT_FROM_MITOSIS		23	0.613383	1.66707	0.00776398	0.0343878	1	2224	tags=43%, list=16%, signal=52%
493	GOBP_POSITIVE_REGULATION_OF_LIPID_LOCALIZATION	GOBP_POSITIVE_REGULATION_OF_LIPID_LOCALIZATION		92	0.475977	1.66683	0.00136986	0.0344013	1	3957	tags=46%, list=29%, signal=64%
494	GOBP_REGULATION_OF_CELLULAR_COMPONENT_SIZE	GOBP_REGULATION_OF_CELLULAR_COMPONENT_SIZE		324	0.420082	1.6655	0	0.0348662	1	3264	tags=38%, list=24%, signal=48%
495	GOBP_REGULATION_OF_PLATELET_ACTIVATION	GOBP_REGULATION_OF_PLATELET_ACTIVATION		38	0.545558	1.6652	0.003003	0.034907	1	3547	tags=53%, list=26%, signal=71%
496	GOBP_CARDIAC_MUSCLE_TISSUE_MORPHOGENESIS	GOBP_CARDIAC_MUSCLE_TISSUE_MORPHOGENESIS		49	0.52815	1.66519	0.00429799	0.0348367	1	2542	tags=39%, list=19%, signal=48%
497	GOBP_PROTEIN_DEMETHYLATION	GOBP_PROTEIN_DEMETHYLATION		27	0.59718	1.66484	0.00765697	0.0349057	1	2758	tags=52%, list=20%, signal=65%
498	GOBP_NEGATIVE_REGULATION_OF_EXTRINSIC_APOPTOTIC_SIGNALING_PATHWAY	GOBP_NEGATIVE_REGULATION_OF_EXTRINSIC_APOPTOTIC_SIGNALING_PATHWAY		78	0.490116	1.66479	0.00139276	0.0348356	1	2895	tags=41%, list=21%, signal=52%
499	GOBP_ADHERENS_JUNCTION_ORGANIZATION	GOBP_ADHERENS_JUNCTION_ORGANIZATION		41	0.544602	1.66468	0.00149925	0.0348151	1	2376	tags=39%, list=18%, signal=47%
500	GOBP_POSITIVE_REGULATION_OF_BEHAVIOR	GOBP_POSITIVE_REGULATION_OF_BEHAVIOR		22	0.614552	1.66407	0.0205371	0.0350223	1	2899	tags=36%, list=21%, signal=46%
501	GOBP_ERBB_SIGNALING_PATHWAY	GOBP_ERBB_SIGNALING_PATHWAY		97	0.475188	1.66373	0.00138313	0.0350954	1	1762	tags=25%, list=13%, signal=28%
502	GOBP_INTRACELLULAR_LIPID_TRANSPORT	GOBP_INTRACELLULAR_LIPID_TRANSPORT		35	0.566554	1.66355	0.00611621	0.0350839	1	2171	tags=43%, list=16%, signal=51%
503	GOBP_NEGATIVE_REGULATION_OF_WOUND_HEALING	GOBP_NEGATIVE_REGULATION_OF_WOUND_HEALING		52	0.528295	1.66311	0.00443131	0.0351798	1	3911	tags=48%, list=29%, signal=67%
504	GOBP_REGULATION_OF_OXIDATIVE_STRESS_INDUCED_CELL_DEATH	GOBP_REGULATION_OF_OXIDATIVE_STRESS_INDUCED_CELL_DEATH		67	0.503094	1.66298	0	0.0351542	1	2140	tags=27%, list=16%, signal=32%
505	GOMF_MIRNA_BINDING	GOMF_MIRNA_BINDING		24	0.616275	1.66283	0.00819672	0.0351405	1	2453	tags=50%, list=18%, signal=61%
506	GOBP_REGULATION_OF_GENE_SILENCING_BY_RNA	GOBP_REGULATION_OF_GENE_SILENCING_BY_RNA		41	0.541787	1.66252	0.00872093	0.0352077	1	2794	tags=46%, list=21%, signal=58%
507	GOBP_HINDBRAIN_DEVELOPMENT	GOBP_HINDBRAIN_DEVELOPMENT		142	0.454246	1.66217	0	0.0352635	1	3709	tags=39%, list=27%, signal=54%
508	GOBP_CHROMATIN_ORGANIZATION	GOBP_CHROMATIN_ORGANIZATION		456	0.40911	1.66213	0	0.0352079	1	2805	tags=34%, list=21%, signal=41%
509	GOBP_POSITIVE_REGULATION_OF_CYTOSKELETON_ORGANIZATION	GOBP_POSITIVE_REGULATION_OF_CYTOSKELETON_ORGANIZATION		172	0.446548	1.66203	0	0.0351802	1	2769	tags=32%, list=20%, signal=40%
510	GOMF_PROTEIN_SERINE_THREONINE_KINASE_ACTIVATOR_ACTIVITY	GOMF_PROTEIN_SERINE_THREONINE_KINASE_ACTIVATOR_ACTIVITY		47	0.531887	1.66202	0.00283286	0.0351182	1	3522	tags=51%, list=26%, signal=69%
511	GOMF_TRANSCRIPTION_COREPRESSOR_ACTIVITY	GOMF_TRANSCRIPTION_COREPRESSOR_ACTIVITY		154	0.447585	1.66188	0	0.0350999	1	2684	tags=36%, list=20%, signal=45%
512	GOBP_REGULATION_OF_RNA_SPLICING	GOBP_REGULATION_OF_RNA_SPLICING		165	0.442774	1.66125	0	0.0352557	1	3171	tags=39%, list=23%, signal=50%
513	GOBP_REGULATION_OF_CELL_SUBSTRATE_JUNCTION_ORGANIZATION	GOBP_REGULATION_OF_CELL_SUBSTRATE_JUNCTION_ORGANIZATION		62	0.501957	1.66104	0.00269906	0.0352877	1	2525	tags=37%, list=19%, signal=45%
514	GOBP_RESPONSE_TO_UNFOLDED_PROTEIN	GOBP_RESPONSE_TO_UNFOLDED_PROTEIN		108	0.465862	1.66091	0	0.0352668	1	3050	tags=40%, list=22%, signal=51%
515	GOBP_NEGATIVE_REGULATION_OF_PROTEIN_KINASE_B_SIGNALING	GOBP_NEGATIVE_REGULATION_OF_PROTEIN_KINASE_B_SIGNALING		34	0.562294	1.6594	0.00792393	0.0357872	1	3913	tags=53%, list=29%, signal=74%
516	GOBP_REGULATION_OF_T_HELPER_CELL_DIFFERENTIATION	GOBP_REGULATION_OF_T_HELPER_CELL_DIFFERENTIATION		29	0.583217	1.65885	0.00625978	0.0359315	1	1948	tags=41%, list=14%, signal=48%
517	GOBP_REGULATION_OF_PROTEIN_LOCALIZATION_TO_MEMBRANE	GOBP_REGULATION_OF_PROTEIN_LOCALIZATION_TO_MEMBRANE		170	0.441639	1.65803	0	0.0361706	1	3810	tags=41%, list=28%, signal=56%
518	GOBP_POSITIVE_REGULATION_OF_P38MAPK_CASCADE	GOBP_POSITIVE_REGULATION_OF_P38MAPK_CASCADE		25	0.602649	1.65801	0.00614439	0.0361143	1	2287	tags=40%, list=17%, signal=48%
519	GOMF_CHOLESTEROL_BINDING	GOMF_CHOLESTEROL_BINDING		38	0.552533	1.65774	0.00144928	0.0361758	1	4150	tags=55%, list=31%, signal=79%
520	GOCC_CYTOPLASMIC_STRESS_GRANULE	GOCC_CYTOPLASMIC_STRESS_GRANULE		64	0.49606	1.6577	0.00865801	0.0361198	1	2949	tags=48%, list=22%, signal=62%
521	GOMF_PROTEIN_SELF_ASSOCIATION	GOMF_PROTEIN_SELF_ASSOCIATION		59	0.507677	1.65693	0.00286123	0.0363542	1	2906	tags=37%, list=21%, signal=47%
522	GOCC_PODOSOME	GOCC_PODOSOME		24	0.610679	1.65689	0.0125196	0.0362913	1	2484	tags=54%, list=18%, signal=66%
523	GOBP_SARCOMERE_ORGANIZATION	GOBP_SARCOMERE_ORGANIZATION		30	0.574283	1.65689	0.0089955	0.0362242	1	3072	tags=47%, list=23%, signal=60%
524	GOBP_RESPONSE_TO_ACTIVITY	GOBP_RESPONSE_TO_ACTIVITY		17	0.650939	1.65673	0.0140187	0.0362088	1	2273	tags=47%, list=17%, signal=56%
525	GOCC_ACTOMYOSIN	GOCC_ACTOMYOSIN		84	0.483463	1.65664	0.00136054	0.036171	1	2627	tags=36%, list=19%, signal=44%
526	GOBP_AMYLOID_PRECURSOR_PROTEIN_METABOLIC_PROCESS	GOBP_AMYLOID_PRECURSOR_PROTEIN_METABOLIC_PROCESS		66	0.501937	1.65659	0.00406504	0.0361179	1	2553	tags=33%, list=19%, signal=41%
527	GOBP_REGULATION_OF_OSTEOBLAST_DIFFERENTIATION	GOBP_REGULATION_OF_OSTEOBLAST_DIFFERENTIATION		125	0.454415	1.65578	0.0012987	0.0363787	1	4034	tags=50%, list=30%, signal=70%
528	GOBP_POSITIVE_REGULATION_OF_T_HELPER_CELL_DIFFERENTIATION	GOBP_POSITIVE_REGULATION_OF_T_HELPER_CELL_DIFFERENTIATION		18	0.643134	1.65576	0.016835	0.0363231	1	758	tags=33%, list=6%, signal=35%
529	GOBP_NEGATIVE_REGULATION_OF_INTRACELLULAR_STEROID_HORMONE_RECEPTOR_SIGNALING_PATHWAY	GOBP_NEGATIVE_REGULATION_OF_INTRACELLULAR_STEROID_HORMONE_RECEPTOR_SIGNALING_PATHWAY		34	0.563948	1.65565	0.00444444	0.0363054	1	2183	tags=44%, list=16%, signal=52%
530	GOBP_RESPONSE_TO_ESTROGEN	GOBP_RESPONSE_TO_ESTROGEN		42	0.536547	1.65548	0.00451128	0.0363074	1	1395	tags=26%, list=10%, signal=29%
531	GOBP_ORGAN_GROWTH	GOBP_ORGAN_GROWTH		164	0.444488	1.65513	0	0.0363959	1	2833	tags=35%, list=21%, signal=43%
532	GOBP_RESPONSE_TO_INSULIN	GOBP_RESPONSE_TO_INSULIN		201	0.432867	1.65504	0	0.0363474	1	3835	tags=44%, list=28%, signal=60%
533	GOBP_POSITIVE_REGULATION_OF_BROWN_FAT_CELL_DIFFERENTIATION	GOBP_POSITIVE_REGULATION_OF_BROWN_FAT_CELL_DIFFERENTIATION		15	0.671525	1.65503	0.00490196	0.0362814	1	1135	tags=40%, list=8%, signal=44%
534	GOBP_REGULATION_OF_POSTSYNAPTIC_MEMBRANE_NEUROTRANSMITTER_RECEPTOR_LEVELS	GOBP_REGULATION_OF_POSTSYNAPTIC_MEMBRANE_NEUROTRANSMITTER_RECEPTOR_LEVELS		80	0.483695	1.65473	0.0028169	0.0363386	1	3022	tags=36%, list=22%, signal=46%
535	GOBP_ANGIOGENESIS	GOBP_ANGIOGENESIS		446	0.409198	1.6544	0	0.0363629	1	3315	tags=33%, list=24%, signal=43%
536	GOBP_POSITIVE_REGULATION_OF_ENDOTHELIAL_CELL_MIGRATION	GOBP_POSITIVE_REGULATION_OF_ENDOTHELIAL_CELL_MIGRATION		98	0.470897	1.65418	0	0.0363806	1	2185	tags=26%, list=16%, signal=30%
537	GOBP_SELECTIVE_AUTOPHAGY	GOBP_SELECTIVE_AUTOPHAGY		71	0.502393	1.65416	0.0027972	0.0363194	1	2516	tags=30%, list=19%, signal=36%
538	GOBP_REGULATION_OF_RESPONSE_TO_OXIDATIVE_STRESS	GOBP_REGULATION_OF_RESPONSE_TO_OXIDATIVE_STRESS		83	0.481016	1.65406	0.0013245	0.0362976	1	1923	tags=27%, list=14%, signal=31%
539	GOBP_MAINTENANCE_OF_CELL_NUMBER	GOBP_MAINTENANCE_OF_CELL_NUMBER		175	0.43964	1.6532	0.00124844	0.036591	1	2521	tags=37%, list=19%, signal=45%
540	GOBP_REGULATION_OF_MUSCLE_SYSTEM_PROCESS	GOBP_REGULATION_OF_MUSCLE_SYSTEM_PROCESS		198	0.431169	1.65311	0	0.0365623	1	2894	tags=33%, list=21%, signal=42%
541	GOBP_UTERUS_DEVELOPMENT	GOBP_UTERUS_DEVELOPMENT		17	0.659529	1.65287	0.0066335	0.0366074	1	2607	tags=47%, list=19%, signal=58%
542	GOBP_CELLULAR_RESPONSE_TO_CHEMICAL_STRESS	GOBP_CELLULAR_RESPONSE_TO_CHEMICAL_STRESS		274	0.419262	1.65266	0	0.0365962	1	2287	tags=26%, list=17%, signal=31%
543	GOMF_ORGANIC_ACID_SODIUM_SYMPORTER_ACTIVITY	GOMF_ORGANIC_ACID_SODIUM_SYMPORTER_ACTIVITY		15	0.672676	1.65141	0.00485437	0.0370472	1	752	tags=27%, list=6%, signal=28%
544	GOBP_SMOOTH_MUSCLE_CELL_PROLIFERATION	GOBP_SMOOTH_MUSCLE_CELL_PROLIFERATION		165	0.44085	1.65062	0	0.0373091	1	3142	tags=37%, list=23%, signal=48%
545	GOBP_POSITIVE_REGULATION_OF_EPITHELIAL_CELL_DIFFERENTIATION	GOBP_POSITIVE_REGULATION_OF_EPITHELIAL_CELL_DIFFERENTIATION		42	0.535287	1.65014	0.00753012	0.0374361	1	2280	tags=31%, list=17%, signal=37%
546	GOBP_REGULATION_OF_NEUROGENESIS	GOBP_REGULATION_OF_NEUROGENESIS		376	0.411263	1.64978	0	0.0374985	1	3103	tags=32%, list=23%, signal=41%
547	GOBP_AUTOPHAGOSOME_ORGANIZATION	GOBP_AUTOPHAGOSOME_ORGANIZATION		102	0.471899	1.64868	0	0.0379041	1	2595	tags=35%, list=19%, signal=43%
548	GOBP_INTRACELLULAR_STEROL_TRANSPORT	GOBP_INTRACELLULAR_STEROL_TRANSPORT		26	0.60521	1.64862	0.00620155	0.0378694	1	2171	tags=46%, list=16%, signal=55%
549	GOBP_REGULATION_OF_COAGULATION	GOBP_REGULATION_OF_COAGULATION		53	0.515353	1.64821	0.00578871	0.0379565	1	3315	tags=43%, list=24%, signal=57%
550	GOBP_MUSCLE_ADAPTATION	GOBP_MUSCLE_ADAPTATION		94	0.469167	1.64776	0	0.0380775	1	4081	tags=50%, list=30%, signal=71%
551	GOBP_ENDOTHELIAL_CELL_MIGRATION	GOBP_ENDOTHELIAL_CELL_MIGRATION		201	0.433157	1.64763	0	0.0380701	1	2216	tags=25%, list=16%, signal=29%
552	GOBP_T_CELL_RECEPTOR_SIGNALING_PATHWAY	GOBP_T_CELL_RECEPTOR_SIGNALING_PATHWAY		88	0.476849	1.64739	0.00138696	0.0380946	1	3574	tags=48%, list=26%, signal=64%
553	GOBP_ESTABLISHMENT_OF_CELL_POLARITY	GOBP_ESTABLISHMENT_OF_CELL_POLARITY		132	0.450967	1.64691	0	0.0382313	1	2916	tags=36%, list=21%, signal=46%
554	GOBP_PROTEIN_SUMOYLATION	GOBP_PROTEIN_SUMOYLATION		37	0.55792	1.64682	0.00608828	0.0382108	1	2187	tags=41%, list=16%, signal=48%
555	GOBP_SMOOTH_MUSCLE_TISSUE_DEVELOPMENT	GOBP_SMOOTH_MUSCLE_TISSUE_DEVELOPMENT		21	0.622922	1.64672	0.0115512	0.0381947	1	2393	tags=43%, list=18%, signal=52%
556	GOBP_REGULATION_OF_AMYLOID_BETA_FORMATION	GOBP_REGULATION_OF_AMYLOID_BETA_FORMATION		31	0.56766	1.64659	0.00773994	0.0381639	1	2553	tags=42%, list=19%, signal=52%
557	GOBP_POSITIVE_REGULATION_OF_NEURON_MIGRATION	GOBP_POSITIVE_REGULATION_OF_NEURON_MIGRATION		20	0.623681	1.64645	0.00802568	0.0381417	1	1526	tags=30%, list=11%, signal=34%
558	GOBP_REGULATION_OF_NERVOUS_SYSTEM_DEVELOPMENT	GOBP_REGULATION_OF_NERVOUS_SYSTEM_DEVELOPMENT		442	0.408188	1.646	0	0.0382646	1	2840	tags=29%, list=21%, signal=35%
559	GOCC_RIBBON_SYNAPSE	GOCC_RIBBON_SYNAPSE		21	0.630204	1.64488	0.011254	0.0386433	1	2915	tags=52%, list=21%, signal=67%
560	GOBP_REGULATION_OF_CYTOSKELETON_ORGANIZATION	GOBP_REGULATION_OF_CYTOSKELETON_ORGANIZATION		456	0.403785	1.64438	0	0.0387608	1	3048	tags=32%, list=22%, signal=40%
561	GOBP_SCHWANN_CELL_DEVELOPMENT	GOBP_SCHWANN_CELL_DEVELOPMENT		30	0.580756	1.64383	0.00907716	0.0389006	1	2776	tags=33%, list=20%, signal=42%
562	GOBP_PALLIUM_DEVELOPMENT	GOBP_PALLIUM_DEVELOPMENT		124	0.456682	1.64338	0.0026455	0.0390275	1	3007	tags=34%, list=22%, signal=43%
563	GOMF_PROTEIN_SERINE_THREONINE_TYROSINE_KINASE_ACTIVITY	GOMF_PROTEIN_SERINE_THREONINE_TYROSINE_KINASE_ACTIVITY		39	0.534984	1.64277	0.00619195	0.0391977	1	3500	tags=59%, list=26%, signal=79%
564	GOBP_POST_TRANSCRIPTIONAL_GENE_SILENCING	GOBP_POST_TRANSCRIPTIONAL_GENE_SILENCING		56	0.51005	1.64276	0.00423131	0.0391282	1	2324	tags=39%, list=17%, signal=47%
565	GOBP_GLIOGENESIS	GOBP_GLIOGENESIS		291	0.416378	1.64274	0	0.0390672	1	3074	tags=30%, list=23%, signal=38%
566	GOCC_ACTIN_FILAMENT_BUNDLE	GOCC_ACTIN_FILAMENT_BUNDLE		81	0.480465	1.64251	0	0.0391162	1	2627	tags=35%, list=19%, signal=43%
567	GOBP_STEROID_HORMONE_SECRETION	GOBP_STEROID_HORMONE_SECRETION		22	0.609879	1.64196	0.0113452	0.0392911	1	4160	tags=68%, list=31%, signal=98%
568	GOBP_STEM_CELL_DEVELOPMENT	GOBP_STEM_CELL_DEVELOPMENT		80	0.48889	1.64116	0.00269542	0.0396121	1	3343	tags=39%, list=25%, signal=51%
569	GOBP_REGULATION_OF_PROTEIN_LOCALIZATION_TO_SYNAPSE	GOBP_REGULATION_OF_PROTEIN_LOCALIZATION_TO_SYNAPSE		22	0.612746	1.64115	0.011254	0.0395445	1	3022	tags=45%, list=22%, signal=58%
570	GOBP_MESENCHYME_MORPHOGENESIS	GOBP_MESENCHYME_MORPHOGENESIS		48	0.519473	1.64078	0.00441826	0.0396335	1	3343	tags=44%, list=25%, signal=58%
571	GOBP_CELL_MIGRATION_INVOLVED_IN_HEART_DEVELOPMENT	GOBP_CELL_MIGRATION_INVOLVED_IN_HEART_DEVELOPMENT		18	0.644626	1.64069	0.00823723	0.0396051	1	3343	tags=56%, list=25%, signal=74%
572	GOBP_LABYRINTHINE_LAYER_MORPHOGENESIS	GOBP_LABYRINTHINE_LAYER_MORPHOGENESIS		22	0.610899	1.6401	0.00958466	0.0398437	1	2512	tags=41%, list=19%, signal=50%
573	GOBP_ENDODERMAL_CELL_DIFFERENTIATION	GOBP_ENDODERMAL_CELL_DIFFERENTIATION		23	0.610007	1.64002	0.0112179	0.039817	1	2345	tags=43%, list=17%, signal=52%
574	GOBP_ENDOCARDIAL_CUSHION_MORPHOGENESIS	GOBP_ENDOCARDIAL_CUSHION_MORPHOGENESIS		34	0.557865	1.63951	0.00769231	0.0399723	1	3343	tags=53%, list=25%, signal=70%
575	GOCC_RUFFLE	GOCC_RUFFLE		141	0.443742	1.63939	0.00126904	0.0399456	1	3447	tags=40%, list=25%, signal=53%
576	GOBP_REGULATION_OF_MODIFICATION_OF_SYNAPTIC_STRUCTURE	GOBP_REGULATION_OF_MODIFICATION_OF_SYNAPTIC_STRUCTURE		16	0.661756	1.63938	0.00645161	0.0398886	1	3022	tags=69%, list=22%, signal=88%
577	GOBP_SERTOLI_CELL_DEVELOPMENT	GOBP_SERTOLI_CELL_DEVELOPMENT		16	0.663348	1.63818	0.00991735	0.0403175	1	2989	tags=50%, list=22%, signal=64%
578	GOBP_INOSITOL_PHOSPHATE_MEDIATED_SIGNALING	GOBP_INOSITOL_PHOSPHATE_MEDIATED_SIGNALING		41	0.533487	1.63812	0.00311526	0.0402761	1	3279	tags=54%, list=24%, signal=71%
579	GOBP_REGULATION_OF_MRNA_METABOLIC_PROCESS	GOBP_REGULATION_OF_MRNA_METABOLIC_PROCESS		261	0.419503	1.63755	0	0.0404577	1	2468	tags=33%, list=18%, signal=39%
580	GOBP_STEM_CELL_PROLIFERATION	GOBP_STEM_CELL_PROLIFERATION		117	0.458775	1.63708	0	0.0406001	1	2091	tags=30%, list=15%, signal=35%
581	GOBP_ATRIOVENTRICULAR_VALVE_DEVELOPMENT	GOBP_ATRIOVENTRICULAR_VALVE_DEVELOPMENT		22	0.617359	1.63695	0.00949367	0.0405705	1	2636	tags=55%, list=19%, signal=68%
582	GOBP_MACROAUTOPHAGY	GOBP_MACROAUTOPHAGY		222	0.42544	1.63624	0	0.0408233	1	2516	tags=28%, list=19%, signal=34%
583	GOBP_NEURON_MIGRATION	GOBP_NEURON_MIGRATION		151	0.444205	1.6353	0	0.0411755	1	2376	tags=26%, list=18%, signal=32%
584	GOBP_POSITIVE_REGULATION_OF_GTPASE_ACTIVITY	GOBP_POSITIVE_REGULATION_OF_GTPASE_ACTIVITY		232	0.421722	1.63519	0	0.0411492	1	3150	tags=39%, list=23%, signal=50%
585	GOBP_REGULATION_OF_ENDOTHELIAL_CELL_DEVELOPMENT	GOBP_REGULATION_OF_ENDOTHELIAL_CELL_DEVELOPMENT		19	0.6234	1.63425	0.0145631	0.0415179	1	2311	tags=42%, list=17%, signal=51%
586	GOMF_PROTEIN_PHOSPHATASE_2A_BINDING	GOMF_PROTEIN_PHOSPHATASE_2A_BINDING		34	0.563308	1.6342	0.0137825	0.0414691	1	2959	tags=50%, list=22%, signal=64%
587	GOBP_NEGATIVE_REGULATION_OF_EPITHELIAL_TO_MESENCHYMAL_TRANSITION	GOBP_NEGATIVE_REGULATION_OF_EPITHELIAL_TO_MESENCHYMAL_TRANSITION		33	0.562902	1.634	0.0108865	0.0414822	1	2033	tags=33%, list=15%, signal=39%
588	GOBP_FIBROBLAST_GROWTH_FACTOR_RECEPTOR_SIGNALING_PATHWAY	GOBP_FIBROBLAST_GROWTH_FACTOR_RECEPTOR_SIGNALING_PATHWAY		62	0.499843	1.63375	0.00143885	0.0415152	1	2169	tags=24%, list=16%, signal=29%
589	GOBP_IMPORT_INTO_NUCLEUS	GOBP_IMPORT_INTO_NUCLEUS		159	0.437607	1.63347	0.00123916	0.041598	1	2530	tags=35%, list=19%, signal=42%
590	GOBP_NEGATIVE_REGULATION_OF_RECEPTOR_MEDIATED_ENDOCYTOSIS	GOBP_NEGATIVE_REGULATION_OF_RECEPTOR_MEDIATED_ENDOCYTOSIS		24	0.592121	1.63312	0.014377	0.0416703	1	3447	tags=42%, list=25%, signal=56%
591	GOBP_PROTEIN_ACETYLATION	GOBP_PROTEIN_ACETYLATION		199	0.427941	1.63256	0	0.0418421	1	2888	tags=39%, list=21%, signal=48%
592	GOBP_POSITIVE_REGULATION_OF_PHOSPHATASE_ACTIVITY	GOBP_POSITIVE_REGULATION_OF_PHOSPHATASE_ACTIVITY		34	0.552221	1.63206	0.00454545	0.0420275	1	2833	tags=47%, list=21%, signal=59%
593	GOCC_CALCIUM_CHANNEL_COMPLEX	GOCC_CALCIUM_CHANNEL_COMPLEX		33	0.560616	1.63201	0.00304878	0.0419783	1	2874	tags=45%, list=21%, signal=58%
594	GOBP_NEGATIVE_REGULATION_OF_MUSCLE_HYPERTROPHY	GOBP_NEGATIVE_REGULATION_OF_MUSCLE_HYPERTROPHY		29	0.561323	1.6318	0.00904977	0.0420003	1	2768	tags=45%, list=20%, signal=56%
595	GOBP_REGULATION_OF_DNA_BINDING_TRANSCRIPTION_FACTOR_ACTIVITY	GOBP_REGULATION_OF_DNA_BINDING_TRANSCRIPTION_FACTOR_ACTIVITY		349	0.409171	1.63061	0	0.042497	1	2814	tags=32%, list=21%, signal=39%
596	GOBP_REGULATION_OF_REGULATED_SECRETORY_PATHWAY	GOBP_REGULATION_OF_REGULATED_SECRETORY_PATHWAY		136	0.448228	1.6305	0	0.0424729	1	2670	tags=26%, list=20%, signal=33%
597	GOBP_TISSUE_REGENERATION	GOBP_TISSUE_REGENERATION		38	0.537641	1.63025	0.0111465	0.0424841	1	3660	tags=50%, list=27%, signal=68%
598	GOBP_REGULATION_OF_PROTEIN_DEPOLYMERIZATION	GOBP_REGULATION_OF_PROTEIN_DEPOLYMERIZATION		80	0.476392	1.62994	0.00281294	0.0425502	1	2470	tags=35%, list=18%, signal=43%
599	GOBP_MODIFICATION_OF_POSTSYNAPTIC_STRUCTURE	GOBP_MODIFICATION_OF_POSTSYNAPTIC_STRUCTURE		23	0.601187	1.62953	0.0125786	0.0426516	1	2898	tags=52%, list=21%, signal=66%
600	GOBP_RECEPTOR_CATABOLIC_PROCESS	GOBP_RECEPTOR_CATABOLIC_PROCESS		28	0.582233	1.6291	0.00749625	0.0427997	1	2538	tags=43%, list=19%, signal=53%
601	GOBP_REGULATION_OF_CELL_MORPHOGENESIS	GOBP_REGULATION_OF_CELL_MORPHOGENESIS		288	0.414278	1.6288	0	0.0428629	1	2507	tags=26%, list=18%, signal=32%
602	GOBP_PROTEIN_LOCALIZATION_TO_CYTOSKELETON	GOBP_PROTEIN_LOCALIZATION_TO_CYTOSKELETON		47	0.522805	1.62838	0.0091047	0.0429826	1	2126	tags=34%, list=16%, signal=40%
603	GOMF_MOLECULAR_FUNCTION_ACTIVATOR_ACTIVITY	GOMF_MOLECULAR_FUNCTION_ACTIVATOR_ACTIVITY		28	0.578088	1.62818	0.014218	0.0430029	1	2798	tags=39%, list=21%, signal=49%
604	GOBP_BONE_DEVELOPMENT	GOBP_BONE_DEVELOPMENT		197	0.427477	1.62773	0	0.0431144	1	2674	tags=27%, list=20%, signal=34%
605	GOCC_PRESYNAPTIC_ACTIVE_ZONE_CYTOPLASMIC_COMPONENT	GOCC_PRESYNAPTIC_ACTIVE_ZONE_CYTOPLASMIC_COMPONENT		18	0.612652	1.62724	0.0242718	0.0432715	1	3197	tags=39%, list=24%, signal=51%
606	GOBP_REGULATION_OF_B_CELL_PROLIFERATION	GOBP_REGULATION_OF_B_CELL_PROLIFERATION		53	0.503755	1.62689	0.00416089	0.0433645	1	2833	tags=36%, list=21%, signal=45%
607	GOBP_REGULATION_OF_PROTEIN_CONTAINING_COMPLEX_DISASSEMBLY	GOBP_REGULATION_OF_PROTEIN_CONTAINING_COMPLEX_DISASSEMBLY		113	0.453749	1.62672	0.00257732	0.0433858	1	3685	tags=45%, list=27%, signal=61%
608	GOBP_NEUROPEPTIDE_SIGNALING_PATHWAY	GOBP_NEUROPEPTIDE_SIGNALING_PATHWAY		32	0.563441	1.62617	0.0109718	0.0435945	1	4174	tags=56%, list=31%, signal=81%
609	GOBP_INTEGRATED_STRESS_RESPONSE_SIGNALING	GOBP_INTEGRATED_STRESS_RESPONSE_SIGNALING		18	0.633942	1.62523	0.0205371	0.0440106	1	1582	tags=39%, list=12%, signal=44%
610	GOBP_POSITIVE_REGULATION_OF_OSTEOBLAST_DIFFERENTIATION	GOBP_POSITIVE_REGULATION_OF_OSTEOBLAST_DIFFERENTIATION		64	0.493039	1.62512	0.00139082	0.0439809	1	4232	tags=55%, list=31%, signal=79%
611	GOBP_POSITIVE_REGULATION_OF_INTRACELLULAR_TRANSPORT	GOBP_POSITIVE_REGULATION_OF_INTRACELLULAR_TRANSPORT		160	0.432681	1.62506	0.00123001	0.0439242	1	3687	tags=39%, list=27%, signal=53%
612	GOBP_POSITIVE_REGULATION_OF_AUTOPHAGY	GOBP_POSITIVE_REGULATION_OF_AUTOPHAGY		131	0.440978	1.6247	0.00253807	0.0440419	1	2401	tags=32%, list=18%, signal=39%
613	GOBP_INTERMEDIATE_FILAMENT_ORGANIZATION	GOBP_INTERMEDIATE_FILAMENT_ORGANIZATION		32	0.560664	1.62443	0.00463679	0.0440904	1	4322	tags=69%, list=32%, signal=101%
614	GOBP_MICROTUBULE_POLYMERIZATION_OR_DEPOLYMERIZATION	GOBP_MICROTUBULE_POLYMERIZATION_OR_DEPOLYMERIZATION		109	0.456932	1.62439	0.00267023	0.0440339	1	2557	tags=31%, list=19%, signal=38%
615	GOBP_POSITIVE_REGULATION_OF_PROTEIN_LOCALIZATION	GOBP_POSITIVE_REGULATION_OF_PROTEIN_LOCALIZATION		413	0.39971	1.62415	0	0.0440651	1	2553	tags=26%, list=19%, signal=31%
616	GOBP_CD4_POSITIVE_ALPHA_BETA_T_CELL_DIFFERENTIATION	GOBP_CD4_POSITIVE_ALPHA_BETA_T_CELL_DIFFERENTIATION		71	0.480778	1.62389	0.00273598	0.0441058	1	2628	tags=38%, list=19%, signal=47%
617	GOBP_NEUROMUSCULAR_JUNCTION_DEVELOPMENT	GOBP_NEUROMUSCULAR_JUNCTION_DEVELOPMENT		51	0.51353	1.62378	0.00882353	0.0440932	1	2852	tags=35%, list=21%, signal=45%
618	GOBP_MUSCLE_HYPERTROPHY	GOBP_MUSCLE_HYPERTROPHY		85	0.474425	1.62357	0	0.0441393	1	2833	tags=38%, list=21%, signal=47%
619	GOBP_P_BODY_ASSEMBLY	GOBP_P_BODY_ASSEMBLY		17	0.656044	1.62356	0.0151007	0.0440756	1	2251	tags=47%, list=17%, signal=56%
620	GOBP_VASCULOGENESIS	GOBP_VASCULOGENESIS		79	0.477439	1.6233	0.00421348	0.0441201	1	2636	tags=35%, list=19%, signal=44%
621	GOBP_RECEPTOR_INTERNALIZATION	GOBP_RECEPTOR_INTERNALIZATION		113	0.45474	1.62326	0.00131752	0.0440641	1	2560	tags=27%, list=19%, signal=34%
622	GOBP_REGULATION_OF_CELL_CELL_ADHESION	GOBP_REGULATION_OF_CELL_CELL_ADHESION		374	0.404657	1.62318	0	0.0440215	1	2919	tags=32%, list=22%, signal=40%
623	GOBP_REGULATION_OF_EXOCYTOSIS	GOBP_REGULATION_OF_EXOCYTOSIS		189	0.424594	1.62298	0	0.0440655	1	3579	tags=34%, list=26%, signal=46%
624	GOBP_NEGATIVE_REGULATION_OF_NEURON_PROJECTION_REGENERATION	GOBP_NEGATIVE_REGULATION_OF_NEURON_PROJECTION_REGENERATION		16	0.651531	1.62288	0.0169492	0.0440344	1	949	tags=25%, list=7%, signal=27%
625	GOBP_REGULATION_OF_NIK_NF_KAPPAB_SIGNALING	GOBP_REGULATION_OF_NIK_NF_KAPPAB_SIGNALING		78	0.48439	1.6228	0.00413223	0.0440071	1	1890	tags=27%, list=14%, signal=31%
626	GOMF_ISOPRENOID_BINDING	GOMF_ISOPRENOID_BINDING		17	0.649288	1.62222	0.00934579	0.0441711	1	1809	tags=35%, list=13%, signal=41%
627	GOBP_REGULATION_OF_DIGESTIVE_SYSTEM_PROCESS	GOBP_REGULATION_OF_DIGESTIVE_SYSTEM_PROCESS		34	0.544704	1.62174	0.0075643	0.0443065	1	3214	tags=47%, list=24%, signal=62%
628	GOBP_HISTONE_MODIFICATION	GOBP_HISTONE_MODIFICATION		403	0.399504	1.62147	0	0.0443573	1	2805	tags=37%, list=21%, signal=45%
629	GOBP_INTERLEUKIN_2_PRODUCTION	GOBP_INTERLEUKIN_2_PRODUCTION		56	0.50804	1.62081	0.00730994	0.0446332	1	3687	tags=50%, list=27%, signal=68%
630	GOBP_NEUROTRANSMITTER_SECRETION	GOBP_NEUROTRANSMITTER_SECRETION		153	0.436193	1.62049	0	0.0446961	1	4412	tags=44%, list=33%, signal=65%
631	GOBP_SENSORY_ORGAN_MORPHOGENESIS	GOBP_SENSORY_ORGAN_MORPHOGENESIS		217	0.422503	1.62032	0	0.0446869	1	3253	tags=35%, list=24%, signal=45%
632	GOBP_REGULATION_OF_MYELOID_CELL_DIFFERENTIATION	GOBP_REGULATION_OF_MYELOID_CELL_DIFFERENTIATION		173	0.431439	1.62012	0	0.0446847	1	2841	tags=38%, list=21%, signal=47%
633	GOBP_NEGATIVE_REGULATION_OF_MAP_KINASE_ACTIVITY	GOBP_NEGATIVE_REGULATION_OF_MAP_KINASE_ACTIVITY		57	0.497177	1.62005	0.00710227	0.0446586	1	3315	tags=47%, list=24%, signal=62%
634	GOBP_FAT_CELL_DIFFERENTIATION	GOBP_FAT_CELL_DIFFERENTIATION		218	0.416448	1.6199	0	0.0446492	1	2624	tags=31%, list=19%, signal=38%
635	GOBP_B_CELL_RECEPTOR_SIGNALING_PATHWAY	GOBP_B_CELL_RECEPTOR_SIGNALING_PATHWAY		36	0.543072	1.61982	0.0199081	0.0446029	1	2940	tags=42%, list=22%, signal=53%
636	GOCC_NUCLEAR_SPECK	GOCC_NUCLEAR_SPECK		296	0.41046	1.61961	0	0.0446177	1	2549	tags=30%, list=19%, signal=36%
637	GOBP_CHONDROCYTE_DIFFERENTIATION	GOBP_CHONDROCYTE_DIFFERENTIATION		98	0.456924	1.61956	0	0.0445587	1	3916	tags=39%, list=29%, signal=54%
638	GOBP_SPINAL_CORD_DEVELOPMENT	GOBP_SPINAL_CORD_DEVELOPMENT		63	0.490718	1.61946	0.00280505	0.0445384	1	2091	tags=25%, list=15%, signal=30%
639	GOBP_SKIN_DEVELOPMENT	GOBP_SKIN_DEVELOPMENT		219	0.419077	1.61889	0	0.0447325	1	3581	tags=41%, list=26%, signal=55%
640	GOBP_NEGATIVE_REGULATION_OF_STRESS_ACTIVATED_PROTEIN_KINASE_SIGNALING_CASCADE	GOBP_NEGATIVE_REGULATION_OF_STRESS_ACTIVATED_PROTEIN_KINASE_SIGNALING_CASCADE		43	0.527496	1.61857	0.0075643	0.0448294	1	2393	tags=33%, list=18%, signal=39%
641	GOBP_POSITIVE_REGULATION_OF_BLOOD_VESSEL_ENDOTHELIAL_CELL_MIGRATION	GOBP_POSITIVE_REGULATION_OF_BLOOD_VESSEL_ENDOTHELIAL_CELL_MIGRATION		52	0.508311	1.61846	0.00867052	0.0448199	1	1502	tags=21%, list=11%, signal=24%
642	GOBP_AXIS_ELONGATION	GOBP_AXIS_ELONGATION		30	0.569156	1.61832	0.0166415	0.044794	1	843	tags=23%, list=6%, signal=25%
643	GOBP_POSITIVE_REGULATION_OF_NEURAL_PRECURSOR_CELL_PROLIFERATION	GOBP_POSITIVE_REGULATION_OF_NEURAL_PRECURSOR_CELL_PROLIFERATION		52	0.514031	1.61815	0.00590842	0.0447973	1	2586	tags=33%, list=19%, signal=40%
644	GOBP_ESTABLISHMENT_OR_MAINTENANCE_OF_MONOPOLAR_CELL_POLARITY	GOBP_ESTABLISHMENT_OR_MAINTENANCE_OF_MONOPOLAR_CELL_POLARITY		22	0.603519	1.61776	0.0125	0.0449225	1	4256	tags=68%, list=31%, signal=99%
645	GOBP_EPIDERMIS_DEVELOPMENT	GOBP_EPIDERMIS_DEVELOPMENT		246	0.414565	1.61754	0	0.0449438	1	3579	tags=40%, list=26%, signal=54%
646	GOBP_POSITIVE_REGULATION_OF_PROTEIN_CATABOLIC_PROCESS	GOBP_POSITIVE_REGULATION_OF_PROTEIN_CATABOLIC_PROCESS		183	0.425808	1.61709	0	0.0450993	1	3086	tags=38%, list=23%, signal=48%
647	GOBP_POSITIVE_REGULATION_OF_OSSIFICATION	GOBP_POSITIVE_REGULATION_OF_OSSIFICATION		48	0.522432	1.61707	0.00438597	0.0450405	1	4232	tags=56%, list=31%, signal=81%
648	GOCC_CLATHRIN_COATED_PIT	GOCC_CLATHRIN_COATED_PIT		64	0.491437	1.61701	0.00436681	0.0449927	1	3151	tags=41%, list=23%, signal=53%
649	GOBP_REGULATION_OF_PROTEIN_MODIFICATION_BY_SMALL_PROTEIN_CONJUGATION_OR_REMOVAL	GOBP_REGULATION_OF_PROTEIN_MODIFICATION_BY_SMALL_PROTEIN_CONJUGATION_OR_REMOVAL		220	0.417946	1.61684	0	0.0450048	1	2772	tags=30%, list=20%, signal=38%
650	GOBP_PATHWAY_RESTRICTED_SMAD_PROTEIN_PHOSPHORYLATION	GOBP_PATHWAY_RESTRICTED_SMAD_PROTEIN_PHOSPHORYLATION		50	0.511126	1.61655	0.0015083	0.0450585	1	2636	tags=40%, list=19%, signal=49%
651	GOBP_SENSORY_ORGAN_DEVELOPMENT	GOBP_SENSORY_ORGAN_DEVELOPMENT		430	0.400315	1.61643	0	0.0450523	1	3261	tags=34%, list=24%, signal=43%
652	GOMF_GTPASE_ACTIVATOR_ACTIVITY	GOMF_GTPASE_ACTIVATOR_ACTIVITY		219	0.41934	1.61616	0	0.0450964	1	1833	tags=27%, list=14%, signal=31%
653	GOMF_SEMAPHORIN_RECEPTOR_BINDING	GOMF_SEMAPHORIN_RECEPTOR_BINDING		22	0.603728	1.61611	0.00772798	0.0450507	1	3204	tags=55%, list=24%, signal=71%
654	GOMF_DYNEIN_COMPLEX_BINDING	GOMF_DYNEIN_COMPLEX_BINDING		17	0.638369	1.61599	0.0234114	0.0450357	1	2906	tags=53%, list=21%, signal=67%
655	GOCC_EXTRINSIC_COMPONENT_OF_SYNAPTIC_MEMBRANE	GOCC_EXTRINSIC_COMPONENT_OF_SYNAPTIC_MEMBRANE		22	0.609093	1.61552	0.00482315	0.0451782	1	2930	tags=45%, list=22%, signal=58%
656	GOBP_AXIS_SPECIFICATION	GOBP_AXIS_SPECIFICATION		68	0.48431	1.61521	0.00283688	0.0452417	1	2448	tags=38%, list=18%, signal=46%
657	GOMF_NUCLEAR_RECEPTOR_COACTIVATOR_ACTIVITY	GOMF_NUCLEAR_RECEPTOR_COACTIVATOR_ACTIVITY		49	0.507018	1.61507	0.00576369	0.0452494	1	2261	tags=39%, list=17%, signal=46%
658	GOBP_CELL_DEATH_IN_RESPONSE_TO_OXIDATIVE_STRESS	GOBP_CELL_DEATH_IN_RESPONSE_TO_OXIDATIVE_STRESS		87	0.465669	1.61485	0.00397351	0.0452824	1	1694	tags=23%, list=12%, signal=26%
659	GOBP_IMMUNE_RESPONSE_REGULATING_CELL_SURFACE_RECEPTOR_SIGNALING_PATHWAY	GOBP_IMMUNE_RESPONSE_REGULATING_CELL_SURFACE_RECEPTOR_SIGNALING_PATHWAY		140	0.44066	1.61437	0.001287	0.0454309	1	3153	tags=41%, list=23%, signal=52%
660	GOMF_ENZYME_ACTIVATOR_ACTIVITY	GOMF_ENZYME_ACTIVATOR_ACTIVITY		445	0.399043	1.61374	0	0.0456287	1	3311	tags=37%, list=24%, signal=47%
661	GOBP_VENTRAL_SPINAL_CORD_DEVELOPMENT	GOBP_VENTRAL_SPINAL_CORD_DEVELOPMENT		32	0.551347	1.61358	0.0140625	0.0456148	1	1963	tags=28%, list=14%, signal=33%
662	GOCC_VOLTAGE_GATED_CALCIUM_CHANNEL_COMPLEX	GOCC_VOLTAGE_GATED_CALCIUM_CHANNEL_COMPLEX		20	0.624555	1.61309	0.0144231	0.0457567	1	2265	tags=40%, list=17%, signal=48%
663	GOBP_POSITIVE_REGULATION_OF_NF_KAPPAB_TRANSCRIPTION_FACTOR_ACTIVITY	GOBP_POSITIVE_REGULATION_OF_NF_KAPPAB_TRANSCRIPTION_FACTOR_ACTIVITY		125	0.441202	1.61303	0.00130719	0.0457142	1	2384	tags=33%, list=18%, signal=39%
664	GOBP_POSITIVE_REGULATION_OF_PEPTIDYL_SERINE_PHOSPHORYLATION	GOBP_POSITIVE_REGULATION_OF_PEPTIDYL_SERINE_PHOSPHORYLATION		87	0.472378	1.61295	0.00412088	0.0456826	1	2548	tags=30%, list=19%, signal=37%
665	GOBP_ATRIAL_SEPTUM_DEVELOPMENT	GOBP_ATRIAL_SEPTUM_DEVELOPMENT		15	0.653574	1.61288	0.0212766	0.0456421	1	1306	tags=40%, list=10%, signal=44%
666	GOBP_REGULATION_OF_RUFFLE_ASSEMBLY	GOBP_REGULATION_OF_RUFFLE_ASSEMBLY		24	0.585478	1.61216	0.0143312	0.0459537	1	2677	tags=38%, list=20%, signal=47%
667	GOBP_REGULATION_OF_MUSCLE_ADAPTATION	GOBP_REGULATION_OF_MUSCLE_ADAPTATION		81	0.479189	1.61169	0.00411523	0.0461331	1	2833	tags=36%, list=21%, signal=45%
668	GOBP_NEGATIVE_REGULATION_OF_B_CELL_PROLIFERATION	GOBP_NEGATIVE_REGULATION_OF_B_CELL_PROLIFERATION		16	0.632551	1.61142	0.0251678	0.0461778	1	2670	tags=44%, list=20%, signal=54%
669	GOBP_NEGATIVE_REGULATION_OF_CELL_MATRIX_ADHESION	GOBP_NEGATIVE_REGULATION_OF_CELL_MATRIX_ADHESION		32	0.556305	1.61102	0.00311526	0.0463016	1	2525	tags=38%, list=19%, signal=46%
670	GOBP_AMYLOID_PRECURSOR_PROTEIN_CATABOLIC_PROCESS	GOBP_AMYLOID_PRECURSOR_PROTEIN_CATABOLIC_PROCESS		53	0.505252	1.61026	0.00456621	0.046616	1	2553	tags=34%, list=19%, signal=42%
671	GOBP_REGULATION_OF_LAMELLIPODIUM_ASSEMBLY	GOBP_REGULATION_OF_LAMELLIPODIUM_ASSEMBLY		33	0.555561	1.6102	0.00887574	0.0465727	1	2470	tags=45%, list=18%, signal=55%
672	GOBP_CELLULAR_RESPONSE_TO_HYDROGEN_PEROXIDE	GOBP_CELLULAR_RESPONSE_TO_HYDROGEN_PEROXIDE		83	0.469947	1.60931	0.00269906	0.046955	1	3065	tags=35%, list=23%, signal=45%
673	GOBP_NEGATIVE_CHEMOTAXIS	GOBP_NEGATIVE_CHEMOTAXIS		40	0.532169	1.60876	0.0103397	0.0471674	1	4596	tags=63%, list=34%, signal=94%
674	GOBP_NEGATIVE_REGULATION_OF_SMALL_MOLECULE_METABOLIC_PROCESS	GOBP_NEGATIVE_REGULATION_OF_SMALL_MOLECULE_METABOLIC_PROCESS		75	0.478844	1.60854	0.002849	0.0472193	1	2543	tags=31%, list=19%, signal=38%
675	GOBP_STRIATED_MUSCLE_CELL_DEVELOPMENT	GOBP_STRIATED_MUSCLE_CELL_DEVELOPMENT		46	0.507407	1.60826	0.00293686	0.0472777	1	4081	tags=52%, list=30%, signal=74%
676	GOBP_RUFFLE_ORGANIZATION	GOBP_RUFFLE_ORGANIZATION		48	0.511817	1.6079	0.00744048	0.0474144	1	2353	tags=35%, list=17%, signal=43%
677	GOBP_NEUROTRANSMITTER_RECEPTOR_LOCALIZATION_TO_POSTSYNAPTIC_SPECIALIZATION_MEMBRANE	GOBP_NEUROTRANSMITTER_RECEPTOR_LOCALIZATION_TO_POSTSYNAPTIC_SPECIALIZATION_MEMBRANE		25	0.569107	1.60771	0.0107692	0.0474329	1	2922	tags=40%, list=22%, signal=51%
678	GOBP_NEGATIVE_REGULATION_OF_PROTEIN_MODIFICATION_PROCESS	GOBP_NEGATIVE_REGULATION_OF_PROTEIN_MODIFICATION_PROCESS		450	0.394311	1.60703	0	0.0476758	1	2895	tags=32%, list=21%, signal=39%
679	GOCC_TIGHT_JUNCTION	GOCC_TIGHT_JUNCTION		109	0.454994	1.60697	0.00267023	0.047642	1	2651	tags=35%, list=20%, signal=43%
680	GOMF_BETA_TUBULIN_BINDING	GOMF_BETA_TUBULIN_BINDING		37	0.53502	1.60685	0.0167939	0.047622	1	3773	tags=49%, list=28%, signal=67%
681	GOBP_POSITIVE_REGULATION_OF_HYDROLASE_ACTIVITY	GOBP_POSITIVE_REGULATION_OF_HYDROLASE_ACTIVITY		461	0.396235	1.60676	0	0.0476037	1	3150	tags=34%, list=23%, signal=43%
682	GOBP_B_CELL_PROLIFERATION	GOBP_B_CELL_PROLIFERATION		63	0.492695	1.60632	0.00420168	0.0477603	1	2833	tags=35%, list=21%, signal=44%
683	GOBP_NON_CANONICAL_WNT_SIGNALING_PATHWAY	GOBP_NON_CANONICAL_WNT_SIGNALING_PATHWAY		48	0.518388	1.60589	0.00151745	0.047929	1	1712	tags=23%, list=13%, signal=26%
684	GOBP_REGULATION_OF_LONG_TERM_SYNAPTIC_POTENTIATION	GOBP_REGULATION_OF_LONG_TERM_SYNAPTIC_POTENTIATION		48	0.504485	1.60544	0.0132743	0.048075	1	2998	tags=38%, list=22%, signal=48%
685	GOMF_PROTEIN_KINASE_B_BINDING	GOMF_PROTEIN_KINASE_B_BINDING		16	0.640327	1.60522	0.0243112	0.0481213	1	3264	tags=63%, list=24%, signal=82%
686	GOBP_REGULATION_OF_DEPHOSPHORYLATION	GOBP_REGULATION_OF_DEPHOSPHORYLATION		117	0.446731	1.60514	0	0.048082	1	2833	tags=35%, list=21%, signal=44%
687	GOMF_RNA_STEM_LOOP_BINDING	GOMF_RNA_STEM_LOOP_BINDING		15	0.637095	1.60497	0.0190174	0.0480888	1	4507	tags=87%, list=33%, signal=130%
688	GOMF_PHOSPHATASE_ACTIVATOR_ACTIVITY	GOMF_PHOSPHATASE_ACTIVATOR_ACTIVITY		17	0.64119	1.60493	0.0107858	0.0480342	1	2736	tags=59%, list=20%, signal=74%
689	GOMF_ACTIN_FILAMENT_BINDING	GOMF_ACTIN_FILAMENT_BINDING		173	0.427824	1.60489	0	0.0479832	1	3017	tags=32%, list=22%, signal=41%
690	GOBP_POSITIVE_REGULATION_OF_POST_TRANSCRIPTIONAL_GENE_SILENCING	GOBP_POSITIVE_REGULATION_OF_POST_TRANSCRIPTIONAL_GENE_SILENCING		23	0.596893	1.60484	0.00941915	0.0479392	1	2632	tags=52%, list=19%, signal=65%
691	GOBP_REGULATION_OF_TRANSLATIONAL_INITIATION	GOBP_REGULATION_OF_TRANSLATIONAL_INITIATION		56	0.500755	1.60479	0.0089955	0.0478987	1	2324	tags=30%, list=17%, signal=36%
692	GOBP_IN_UTERO_EMBRYONIC_DEVELOPMENT	GOBP_IN_UTERO_EMBRYONIC_DEVELOPMENT		448	0.393154	1.60438	0	0.0480192	1	3261	tags=36%, list=24%, signal=46%
693	GOBP_RESPONSE_TO_HYDROGEN_PEROXIDE	GOBP_RESPONSE_TO_HYDROGEN_PEROXIDE		106	0.456083	1.60379	0.0013369	0.0482275	1	3065	tags=34%, list=23%, signal=44%
694	GOBP_NEURON_RECOGNITION	GOBP_NEURON_RECOGNITION		42	0.513115	1.60318	0.0137195	0.0484385	1	4385	tags=55%, list=32%, signal=81%
695	GOBP_NEGATIVE_REGULATION_OF_COAGULATION	GOBP_NEGATIVE_REGULATION_OF_COAGULATION		35	0.546113	1.60302	0.0136571	0.0484467	1	3315	tags=46%, list=24%, signal=60%
696	GOBP_REGULATION_OF_PROTEASOMAL_PROTEIN_CATABOLIC_PROCESS	GOBP_REGULATION_OF_PROTEASOMAL_PROTEIN_CATABOLIC_PROCESS		166	0.427811	1.60272	0	0.0485336	1	3086	tags=37%, list=23%, signal=48%
697	GOBP_REGULATION_OF_ESTABLISHMENT_OF_PLANAR_POLARITY	GOBP_REGULATION_OF_ESTABLISHMENT_OF_PLANAR_POLARITY		37	0.535809	1.60256	0.00896861	0.048548	1	830	tags=22%, list=6%, signal=23%
698	GOBP_ENTRAINMENT_OF_CIRCADIAN_CLOCK	GOBP_ENTRAINMENT_OF_CIRCADIAN_CLOCK		26	0.567932	1.60241	0.014377	0.0485492	1	2691	tags=42%, list=20%, signal=53%
699	GOBP_REGULATION_OF_PROTEIN_DEPHOSPHORYLATION	GOBP_REGULATION_OF_PROTEIN_DEPHOSPHORYLATION		86	0.469089	1.60179	0	0.0487563	1	2679	tags=34%, list=20%, signal=42%
700	GOBP_POSITIVE_REGULATION_OF_STEM_CELL_DIFFERENTIATION	GOBP_POSITIVE_REGULATION_OF_STEM_CELL_DIFFERENTIATION		18	0.629109	1.60128	0.0140625	0.0489279	1	1331	tags=39%, list=10%, signal=43%
701	GOBP_RESPONSE_TO_PEPTIDE	GOBP_RESPONSE_TO_PEPTIDE		335	0.40456	1.60107	0	0.0489668	1	2895	tags=33%, list=21%, signal=40%
702	GOBP_PROTEASOMAL_PROTEIN_CATABOLIC_PROCESS	GOBP_PROTEASOMAL_PROTEIN_CATABOLIC_PROCESS		452	0.393697	1.6007	0	0.0490822	1	3086	tags=33%, list=23%, signal=41%
703	GOBP_POSITIVE_REGULATION_OF_APOPTOTIC_SIGNALING_PATHWAY	GOBP_POSITIVE_REGULATION_OF_APOPTOTIC_SIGNALING_PATHWAY		134	0.435602	1.6005	0.0012837	0.0491173	1	2270	tags=27%, list=17%, signal=32%
704	GOBP_EMBRYONIC_ORGAN_MORPHOGENESIS	GOBP_EMBRYONIC_ORGAN_MORPHOGENESIS		238	0.411881	1.59962	0	0.049482	1	3253	tags=34%, list=24%, signal=44%
705	GOBP_POSITIVE_REGULATION_OF_PATHWAY_RESTRICTED_SMAD_PROTEIN_PHOSPHORYLATION	GOBP_POSITIVE_REGULATION_OF_PATHWAY_RESTRICTED_SMAD_PROTEIN_PHOSPHORYLATION		36	0.528999	1.59884	0.0177515	0.0498658	1	2282	tags=36%, list=17%, signal=43%
