# Supplementary material for: Supplementation with short-chain fatty acids and a prebiotic improves clinical outcome in Parkinson’s disease: a randomized double-blind prospective study
Source: Sci Rep. 2025 Dec 5;16:315. doi: 10.1038/s41598-025-29692-x (PMC12770440; doi:10.1038/s41598-025-29692-x)
Supplement: Supplementary file 5 — Supplementary Material 5 [file 41598_2025_29692_MOESM5_ESM.xlsx]

## Sheet: res_df
	baseMean	log2FoldChange	lfcSE	stat	pvalue	padj
0610005C13Rik	144.288	-0.100442	0.168695	-0.595407	0.551571	0.756675
0610007N19Rik	388.051	-0.0808141	0.144036	-0.56107	0.57475	0.771772
0610007P14Rik	631.685	0.258531	0.105186	2.45784	0.0139774	0.106517
0610009B22Rik	143.705	0.187069	0.138207	1.35355	0.175881	0.419425
0610009D07Rik	830.208	0.0153725	0.107991	0.14235	0.886803	0.947707
0610009L18Rik	24.7382	0.0717002	0.27891	0.257073	0.797123	0.903832
0610009O20Rik	632.593	0.0961626	0.105821	0.908732	0.363492	0.618305
0610010F05Rik	294.43	-0.0773521	0.0849372	-0.910697	0.362455	0.617393
0610010K14Rik	333.994	0.196768	0.0998127	1.97137	0.0486813	0.207984
0610011F06Rik	506.1	0.216396	0.107651	2.01017	0.0444135	0.197654
0610012G03Rik	422.737	0.193043	0.107261	1.79975	0.0719	0.259058
0610030E20Rik	447.721	0.187699	0.166697	1.12599	0.260171	0.521302
0610031J06Rik	1133.07	0.130452	0.0778917	1.67479	0.0939761	0.300321
0610037L13Rik	363.015	0.179253	0.132241	1.3555	0.175258	0.418308
0610040J01Rik	900.79	0.167112	0.220377	0.758301	0.448271	0.685516
1110001A16Rik	115.47	0.194166	0.145494	1.33453	0.182029	0.427844
1110001J03Rik	263.689	0.216068	0.0995026	2.17149	0.0298945	0.160904
1110004E09Rik	227.773	0.26208	0.0962216	2.72372	0.00645521	0.0720055
1110004F10Rik	959.844	0.208038	0.0617949	3.36659	0.000761024	0.0261322
1110007C09Rik	630.577	-0.00388051	0.120666	-0.0321592	0.974345	0.988551
1110008F13Rik	469.839	0.170802	0.108159	1.57918	0.114294	0.332793
1110008J03Rik	111.971	-0.119449	0.137159	-0.870882	0.383819	0.636913
1110008L16Rik	156.106	0.179777	0.100637	1.78639	0.074036	0.263327
1110008P14Rik	172.738	0.107774	0.137751	0.782379	0.433992	0.675557
1110012L19Rik	133.761	0.367351	0.121312	3.02815	0.00246056	0.0453016
1110018G07Rik	651.338	0.014756	0.0730775	0.201923	0.839977	0.924568
1110032A03Rik	211.241	-0.0974107	0.120082	-0.811199	0.417251	0.6621
1110034G24Rik	46.7505	0.277344	0.201541	1.37611	0.168786	0.410727
1110037F02Rik	809.495	0.00753313	0.081952	0.0919213	0.926761	0.968174
1110038B12Rik	1113.79	0.18719	0.133178	1.40557	0.159853	0.399069
1110038F14Rik	192.394	0.173479	0.195489	0.887409	0.374859	0.629123
1110051M20Rik	134.543	-0.272881	0.225357	-1.21088	0.22594	0.480751
1110054M08Rik	63.5743	0.1282	0.156672	0.818272	0.413202	0.660004
1110057K04Rik	511.993	0.155008	0.118793	1.30486	0.191941	0.440462
1110058L19Rik	118.887	-0.0539544	0.169163	-0.318949	0.749765	0.878153
1110059E24Rik	662.861	0.222347	0.134252	1.65619	0.0976837	0.30668
1110059G10Rik	135.257	0.341533	0.15756	2.16764	0.0301862	0.161832
1110065P20Rik	98.976	0.119192	0.16136	0.738675	0.460104	0.693863
1190002F15Rik	55.0377	0.281472	0.187331	1.50254	0.132958	0.360822
1190002N15Rik	806.284	-0.15421	0.135561	-1.13757	0.255299	0.516266
1190003J15Rik	68.4884	0.658093	0.198676	3.3124	0.000925	0.029083
1190007I07Rik	82.2923	0.390359	0.152437	2.56079	0.0104435	0.0917199
1200011I18Rik	481.952	0.14816	0.0895089	1.65526	0.0978723	0.306704
1200014J11Rik	543.017	0.16521	0.0736991	2.24168	0.0249822	0.146429
1300002E11Rik	121.803	0.118721	0.159247	0.745515	0.45596	0.691739
1300002K09Rik	424.558	0.0723629	0.221885	0.326127	0.744328	0.875581
1300018J18Rik	221.853	0.195184	0.0875185	2.2302	0.0257341	0.14897
1500009L16Rik	120.544	0.0873341	0.139334	0.626795	0.530794	0.742013
1500011B03Rik	112.582	-0.15433	0.188979	-0.816651	0.414128	0.660832
1500011K16Rik	193.859	0.389476	0.163288	2.38521	0.0170693	0.119945
1500012F01Rik	744.926	0.153733	0.14535	1.05767	0.290205	0.551362
1500015A07Rik	31.8922	-0.138822	0.205181	-0.67658	0.498672	0.719563
1500032L24Rik	987.071	0.096609	0.0845071	1.14321	0.252953	0.513526
1600002H07Rik	63.4396	0.269381	0.245604	1.09681	0.272724	0.533819
1600002K03Rik	74.2221	0.352367	0.206834	1.70362	0.0884517	0.289694
1600012H06Rik	389.824	0.155418	0.108315	1.43488	0.151321	0.389026
1600014C10Rik	161.538	-0.11128	0.160662	-0.692637	0.488537	0.713756
1600016N20Rik	71.5971	-0.0366335	0.266666	-0.137376	0.890734	0.95056
1600020E01Rik	92.952	-0.172978	0.15784	-1.09591	0.273119	0.534084
1600029D21Rik	798.981	0.143399	0.229419	0.625054	0.531936	0.743035
1700001L05Rik	148.951	0.103832	0.151772	0.684131	0.493892	0.717194
1700001O22Rik	33.6308	0.0487885	0.193245	0.252469	0.800678	0.905479
1700008J07Rik	50.6421	-0.11275	0.188007	-0.599713	0.548698	0.754181
1700010I14Rik	37.3864	-0.0109163	0.206691	-0.0528143	0.95788	0.981902
1700011H14Rik	261.821	0.181623	0.342292	0.53061	0.595689	0.786635
1700011J10Rik	45.501	0.33896	0.154004	2.20098	0.0277377	0.155077
1700012B15Rik	86.6087	-0.17965	0.141977	-1.26535	0.205747	0.456546
1700017B05Rik	1084.13	-0.172256	0.210841	-0.816995	0.413932	0.660832
1700019D03Rik	47.1207	0.270809	0.203221	1.33258	0.182669	0.428533
1700019G17Rik	76.5504	0.118137	0.240047	0.492141	0.62262	0.804067
1700019L03Rik	36.698	-0.200031	0.27366	-0.730948	0.464811	0.696635
1700020I14Rik	498.083	-0.00658975	0.116307	-0.0566584	0.954817	0.980321
1700020L24Rik	181.186	0.110702	0.129595	0.854211	0.392988	0.645575
1700021F05Rik	277.375	0.30448	0.0836788	3.63867	0.000274048	0.0170216
1700021K19Rik	716.789	-0.277392	0.101052	-2.74503	0.00605055	0.0702425
1700024P16Rik	46.5905	0.142381	0.266357	0.534548	0.592962	0.785196
1700025G04Rik	865.734	-0.101271	0.100802	-1.00466	0.31506	0.574373
1700030A11Rik	25.1291	-0.0132957	0.439095	-0.0302799	0.975844	0.988815
1700030C10Rik	24.818	0.249991	0.365492	0.683986	0.493984	0.717194
1700030K09Rik	48.4897	0.211201	0.279522	0.75558	0.449901	0.686859
1700037C18Rik	31.4573	0.21225	0.249508	0.850677	0.394949	0.646449
1700037H04Rik	375.64	0.209785	0.149422	1.40397	0.160327	0.399357
1700040L02Rik	75.1014	0.0605175	0.153052	0.395405	0.692544	0.846265
1700049G17Rik	53.6261	0.244892	0.255032	0.960243	0.336933	0.593361
1700052K11Rik	36.9379	0.120059	0.356704	0.33658	0.736434	0.87029
1700052N19Rik	139.45	0.269216	0.138518	1.94355	0.05195	0.214885
1700066B19Rik	150.371	0.899524	0.207778	4.32926	1.49608e-05	0.00402192
1700066J24Rik	49.56	-0.305995	0.274247	-1.11576	0.264524	0.525063
1700066M21Rik	88.5171	0.137811	0.165705	0.831661	0.4056	0.653961
1700094D03Rik	63.759	-0.428851	0.179745	-2.38588	0.0170381	0.119788
1700096K18Rik	34.5844	0.0477082	0.190626	0.250271	0.802378	0.906533
1700113A16Rik	274.164	-0.281427	0.126316	-2.22796	0.0258835	0.149295
1700123O20Rik	421.544	0.125411	0.114523	1.09507	0.273485	0.534252
1810007I06Rik	37.8026	0.275015	0.223634	1.22975	0.21879	0.472431
1810009A15Rik	225.567	0.257724	0.141182	1.82548	0.067929	0.250439
1810010D01Rik	29.9649	0.0203551	0.294787	0.06905	0.94495	0.975174
1810010H24Rik	32.313	-0.0369163	0.214914	-0.171773	0.863616	0.936372
1810011O10Rik	3105.43	0.359038	0.213927	1.67832	0.0932843	0.299219
1810013D10Rik	333.162	0.268071	0.11759	2.27971	0.0226249	0.138913
1810013L24Rik	1314.96	-0.139675	0.138317	-1.00982	0.312583	0.572009
1810014B01Rik	32.3274	0.497616	0.31657	1.5719	0.115974	0.335557
1810019D21Rik	167.248	-0.21839	0.301354	-0.724694	0.46864	0.699194
1810019J16Rik	383.201	0.302017	0.119528	2.52675	0.0115125	0.0960718
1810022K09Rik	232.688	0.279214	0.118365	2.35891	0.0183285	0.124756
1810026B05Rik	736.424	0.0708782	0.198148	0.357704	0.720565	0.863113
1810026J23Rik	622.373	-0.0313824	0.0591602	-0.530464	0.59579	0.786635
1810030O07Rik	360	0.0127999	0.0932819	0.137217	0.890859	0.950619
1810032O08Rik	252.058	0.325523	0.167344	1.94523	0.0517477	0.214532
1810034E14Rik	52.2839	-0.276388	0.174239	-1.58626	0.112681	0.330735
1810037I17Rik	1049.4	0.131315	0.0972588	1.35016	0.176965	0.421049
1810041L15Rik	385.217	-0.695041	0.308746	-2.25118	0.0243744	0.144887
1810043G02Rik	140.508	-0.454587	0.189737	-2.39589	0.0165802	0.118021
1810043H04Rik	200.954	0.328773	0.130809	2.51339	0.0119577	0.0977436
1810055G02Rik	955.849	-0.188053	0.083871	-2.24217	0.0249502	0.146429
1810058I24Rik	455.256	0.113753	0.117011	0.972155	0.330973	0.589212
1810065E05Rik	20560	0.104713	0.238353	0.439317	0.660432	0.826164
2010001M06Rik	464.859	0.169038	0.149798	1.12844	0.259135	0.520302
2010002M12Rik	168.676	0.00937997	0.323725	0.0289751	0.976884	0.989286
2010003K11Rik	171.816	0.314024	0.243808	1.288	0.197747	0.447926
2010003O02Rik	25.5874	0.198123	0.24675	0.802931	0.422015	0.665232
2010012O05Rik	181.082	-0.0415997	0.153593	-0.270845	0.78651	0.899011
2010107E04Rik	1642.94	0.196222	0.0851379	2.30475	0.0211804	0.134991
2010107G12Rik	80.1925	0.576109	0.2955	1.9496	0.0512234	0.213727
2010107G23Rik	158.53	0.227118	0.143729	1.58018	0.114065	0.33249
2010109I03Rik	1552.16	0.0273058	0.796117	0.0342987	0.972639	0.987556
2010111I01Rik	413.743	0.0149299	0.104623	0.142702	0.886525	0.947559
2010204K13Rik	26.7722	0.464397	0.234163	1.98322	0.0473433	0.205184
2010300C02Rik	681.367	-0.0539038	0.15049	-0.358188	0.720203	0.862908
2010315B03Rik	179.461	0.0193561	0.136333	0.141976	0.887099	0.947825
2010320M18Rik	68.2992	0.120813	0.221793	0.54471	0.585953	0.779567
2200002D01Rik	2188.97	0.184959	0.151445	1.2213	0.221973	0.476048
2210013O21Rik	259.41	-0.0768166	0.123749	-0.620746	0.534767	0.744766
2210015D19Rik	89.2078	0.207777	0.166265	1.24968	0.211418	0.464421
2210016F16Rik	644.105	0.286296	0.0919242	3.11447	0.00184273	0.0408561
2210016L21Rik	354.151	0.0614969	0.128533	0.478453	0.632328	0.809592
2210018M11Rik	458.339	-0.385236	0.17989	-2.14151	0.032233	0.167083
2210404J11Rik	83.1316	-0.0418757	0.187311	-0.223563	0.823098	0.916601
2210404O07Rik	840.874	0.182487	0.243159	0.750487	0.452961	0.689426
2210404O09Rik	62.9004	0.0220745	0.172987	0.127608	0.898459	0.954615
2210407C18Rik	384.037	0.528303	0.295651	1.78692	0.0739509	0.263094
2210408I21Rik	76.3575	-0.293347	0.187795	-1.56206	0.118274	0.338311
2300009A05Rik	102.056	0.218663	0.157508	1.38827	0.165055	0.406259
2310001H17Rik	26.4813	0.104761	0.238213	0.439778	0.660098	0.825898
2310003H01Rik	402.82	0.149757	0.100104	1.49601	0.134651	0.363888
2310007B03Rik	191.556	0.327482	0.233553	1.40217	0.160865	0.400131
2310008H04Rik	316.22	0.0756152	0.102873	0.735032	0.46232	0.69494
2310008H09Rik	630.107	0.0446769	0.0824247	0.542033	0.587796	0.780946
2310009A05Rik	101.691	0.271242	0.176335	1.53823	0.123993	0.347184
2310009B15Rik	81.6866	0.203481	0.132348	1.53747	0.124179	0.347563
2310010J17Rik	38.1535	0.028746	0.190396	0.15098	0.879992	0.945416
2310011J03Rik	386.58	0.256816	0.118292	2.17104	0.0299284	0.160981
2310014L17Rik	23.5471	-0.618942	0.511213	-1.21073	0.225998	0.480751
2310015A10Rik	135.843	-0.521172	0.172823	-3.01564	0.00256439	0.0465082
2310022A10Rik	261.784	0.184313	0.103713	1.77714	0.0755454	0.266323
2310022B05Rik	2343.95	0.0017123	0.0893044	0.0191738	0.984702	0.993046
2310030G06Rik	141.867	0.172149	0.145315	1.18466	0.236152	0.493205
2310033P09Rik	186.929	0.012473	0.154503	0.0807299	0.935657	0.971974
2310035C23Rik	1187.48	-0.0611891	0.195111	-0.313612	0.753816	0.880824
2310036O22Rik	1449.12	0.0843276	0.0615581	1.36989	0.170722	0.412929
2310039H08Rik	253.416	0.287719	0.105824	2.71885	0.00655091	0.072209
2310042D19Rik	25.7444	-0.130744	0.225835	-0.578938	0.562631	0.763353
2310044G17Rik	1070.84	-0.0305759	0.131584	-0.232367	0.816253	0.914066
2310045N01Rik	173.688	0.0401499	0.131506	0.305309	0.760131	0.884473
2310047M10Rik	473.75	-0.133599	0.106998	-1.24861	0.211809	0.465125
2310057M21Rik	146.062	-0.134361	0.165317	-0.812751	0.416361	0.6617
2310061I04Rik	529.352	0.171289	0.105628	1.62162	0.104884	0.318525
2310067B10Rik	1391.75	-0.0227529	0.0640062	-0.355479	0.722231	0.864042
2410002F23Rik	667.929	0.150416	0.131641	1.14263	0.253193	0.513692
2410004B18Rik	250.464	0.000765394	0.102732	0.00745042	0.994055	0.99665
2410004N09Rik	304.78	0.39095	0.0906442	4.31301	1.61045e-05	0.00404669
2410006H16Rik	822.814	0.299049	0.103424	2.89148	0.00383427	0.0572376
2410015M20Rik	881.382	0.216003	0.0803595	2.68796	0.00718909	0.0760706
2410016O06Rik	210.233	0.560025	0.169586	3.3023	0.000958939	0.0297808
2410066E13Rik	71.4347	-0.715529	0.257705	-2.77654	0.00549405	0.0673352
2410089E03Rik	246.861	-0.577054	0.171847	-3.35795	0.000785216	0.0264382
2410127L17Rik	59.274	0.0862637	0.166856	0.516996	0.605159	0.792224
2410131K14Rik	192.907	-0.0577295	0.101578	-0.568328	0.569813	0.768873
2500004C02Rik	38.582	-0.352648	0.218121	-1.61675	0.105931	0.32013
2510002D24Rik	286.241	0.180455	0.107748	1.67479	0.0939751	0.300321
2510003E04Rik	373.406	-0.0626508	0.128942	-0.485884	0.627049	0.806566
2510009E07Rik	676.787	-0.272911	0.124884	-2.18531	0.0288662	0.157557
2510039O18Rik	1476.94	0.145402	0.0828375	1.75526	0.0792143	0.272728
2510049J12Rik	555.541	0.0930824	0.149932	0.62083	0.534712	0.744765
2610001J05Rik	434.508	0.198529	0.118562	1.67447	0.0940375	0.300397
2610002J02Rik	262.763	0.175553	0.169799	1.03388	0.30119	0.560536
2610002M06Rik	533.015	0.22468	0.0762392	2.94705	0.00320826	0.0517613
2610005L07Rik	58.0922	-0.0367319	0.197297	-0.186176	0.852307	0.930781
2610008E11Rik	168.157	-0.0291152	0.226899	-0.128318	0.897898	0.954377
2610015P09Rik	68.5817	0.275238	0.193536	1.42216	0.154981	0.392858
2610018G03Rik	102.955	-0.0671919	0.267256	-0.251414	0.801494	0.906063
2610019E17Rik	35.5476	-0.116781	0.173862	-0.671684	0.501785	0.721397
2610019F03Rik	85.8484	-0.245331	0.277928	-0.882715	0.37739	0.631341
2610020C07Rik	24.8964	-0.326774	0.32998	-0.990286	0.322034	0.580771
2610020H08Rik	66.5366	0.0500618	0.179885	0.278299	0.780783	0.896466
2610034B18Rik	884.204	0.240647	0.123744	1.94471	0.0518099	0.214594
2610035D17Rik	429.826	-0.232871	0.292839	-0.795218	0.426487	0.669714
2610044O15Rik8	44.9361	0.117539	0.287659	0.408605	0.68283	0.838847
2610203C20Rik	330.565	0.576296	0.414242	1.39121	0.164163	0.405005
2610301B20Rik	182.792	-0.202322	0.131619	-1.53718	0.12425	0.347619
2610301G19Rik	811.736	0.290334	0.0600466	4.83514	1.3305e-06	0.00155936
2610305D13Rik	29.3146	-0.600152	0.250144	-2.39923	0.0164297	0.117273
2610306M01Rik	30.8987	-0.0422589	0.253787	-0.166513	0.867753	0.938959
2610307P16Rik	35.8157	-0.3196	0.344818	-0.926864	0.353997	0.610467
2610318N02Rik	30.421	0.476186	0.207726	2.29237	0.0218842	0.137308
2610507B11Rik	4134.27	0.00780739	0.0854406	0.091378	0.927192	0.968296
2610507I01Rik	94.7838	-0.185802	0.265205	-0.700599	0.483554	0.709676
2610524H06Rik	66.4316	-0.0843338	0.259881	-0.32451	0.745552	0.876281
2610528A11Rik	10564.1	0.205243	0.173612	1.1822	0.237127	0.494403
2610528J11Rik	525.956	0.322816	0.210165	1.53601	0.124537	0.347918
2700029M09Rik	346.688	0.262256	0.111467	2.35277	0.0186343	0.125984
2700049A03Rik	135.139	0.0599698	0.135165	0.443678	0.657275	0.824145
2700050L05Rik	436.331	-0.259319	0.202555	-1.28024	0.200462	0.450487
2700060E02Rik	1403.13	0.156992	0.0625546	2.50968	0.0120841	0.0980676
2700062C07Rik	99.4035	0.529822	0.177284	2.98855	0.00280301	0.0486369
2700081O15Rik	756.719	-0.424322	0.128794	-3.29459	0.000985666	0.0299263
2700086A05Rik	64.4496	0.180199	0.172786	1.0429	0.296995	0.55662
2700089E24Rik	1162.96	0.111985	0.102763	1.08974	0.275829	0.536994
2700094K13Rik	294.879	0.323313	0.0981657	3.29354	0.000989336	0.0299263
2700097O09Rik	65.4248	-0.0953225	0.179782	-0.530212	0.595965	0.786635
2700099C18Rik	54.6697	0.0677633	0.207202	0.327039	0.743638	0.87519
2810001G20Rik	59.1098	-0.110427	0.187468	-0.589046	0.55583	0.759829
2810002D19Rik	54.3157	0.0684409	0.222339	0.307823	0.758217	0.883503
2810004N23Rik	255.355	0.378889	0.106538	3.55638	0.000375994	0.0191868
2810006K23Rik	64.2039	0.10958	0.214721	0.510339	0.609814	0.795347
2810008D09Rik	59.295	-0.02369	0.403706	-0.0586813	0.953206	0.97926
2810013P06Rik	95.9761	0.0346079	0.195898	0.176662	0.859774	0.935201
2810021J22Rik	40.0555	0.182792	0.256091	0.713776	0.475366	0.703867
2810025M15Rik	132.745	0.11113	0.126133	0.881055	0.378288	0.63222
2810403A07Rik	1659.49	-0.399243	0.240163	-1.66238	0.0964359	0.305092
2810407C02Rik	2504.18	0.0192776	0.0544037	0.354344	0.723081	0.864601
2810408A11Rik	75.9298	-0.0866146	0.168245	-0.514811	0.606685	0.793456
2810408M09Rik	144.785	0.165172	0.151596	1.08955	0.27591	0.536994
2810410L24Rik	41.1563	0.00115054	0.302258	0.00380649	0.996963	0.998446
2810417H13Rik	582.943	0.206755	0.140824	1.46818	0.142056	0.374793
2810428I15Rik	383.125	0.25757	0.139426	1.84735	0.0646957	0.243511
2810459M11Rik	176.925	0.220807	0.214513	1.02934	0.303318	0.562796
2810474O19Rik	503.103	0.0933398	0.176784	0.527986	0.597509	0.787292
2900011O08Rik	32.4904	-0.955327	0.409863	-2.33084	0.0197615	0.13022
2900026A02Rik	1645.68	-0.0830872	0.166406	-0.499303	0.617566	0.800511
2900056M20Rik	54.2712	-0.418561	0.231537	-1.80775	0.0706458	0.25672
2900076A07Rik	29.8904	0.185737	0.326621	0.568663	0.569585	0.768872
2900097C17Rik	841.834	-0.0414609	0.157484	-0.263271	0.792342	0.901693
3010026O09Rik	35.9061	-0.117308	0.224534	-0.522448	0.601358	0.789686
3110001D03Rik	280.56	0.313393	0.122559	2.55707	0.0105557	0.0924063
3110001I22Rik	52.4706	-0.223599	0.232197	-0.96297	0.335562	0.592408
3110002H16Rik	516.509	0.124557	0.111362	1.11849	0.263358	0.523667
3110021N24Rik	28.7824	-0.191618	0.288353	-0.664526	0.506354	0.725564
3110040N11Rik	145.034	0.328081	0.116616	2.81334	0.00490294	0.0638913
3110043O21Rik	422.633	-0.145809	0.133532	-1.09194	0.274858	0.535932
3110052M02Rik	63.5608	0.142752	0.195597	0.729829	0.465495	0.696822
3110056K07Rik	36.6608	-0.0692289	0.218092	-0.31743	0.750917	0.878818
3110057O12Rik	70.0901	-0.190619	0.185022	-1.03025	0.302894	0.562392
3110062M04Rik	28.6073	-0.0472441	0.214479	-0.220273	0.825658	0.917307
3110082I17Rik	122.585	0.251174	0.112601	2.23066	0.0257037	0.148907
3230401D17Rik	117.876	-0.1139	0.199316	-0.571454	0.567692	0.767671
3632451O06Rik	210.376	-0.178969	0.145793	-1.22755	0.219615	0.472879
3830403N18Rik	45.406	-0.0879291	0.246213	-0.357126	0.720998	0.863327
3830406C13Rik	323.802	0.0604168	0.122932	0.491465	0.623098	0.804301
4632415K11Rik	152.312	0.175431	0.167406	1.04793	0.294669	0.554634
4632415L05Rik	141.509	0.186927	0.204507	0.91404	0.360696	0.615865
4632428C04Rik	34.0343	-0.269549	0.241017	-1.11838	0.263404	0.523667
4632428N05Rik	324.227	-0.0799087	0.125584	-0.636298	0.524582	0.73852
4632434I11Rik	54.1294	0.0237599	0.176637	0.134513	0.892997	0.951645
4833412C05Rik	45.5013	-0.324027	0.247391	-1.30978	0.190272	0.438087
4833420G17Rik	416.157	-0.0972493	0.10147	-0.958407	0.337857	0.593986
4833424O15Rik	175.275	-0.636701	0.214081	-2.97411	0.00293835	0.0497205
4833439L19Rik	2601.08	-0.000174575	0.103237	-0.001691	0.998651	0.999019
4921524J17Rik	372.423	-0.30734	0.182462	-1.6844	0.0921041	0.296573
4921531C22Rik	25.3448	-0.358762	0.236303	-1.51822	0.128958	0.354805
4921536K21Rik	38.3789	0.105534	0.241462	0.437062	0.662066	0.826684
4922501C03Rik	115.497	0.0630941	0.134033	0.470736	0.637829	0.812801
4930402H24Rik	970.92	-0.118977	0.0948835	-1.25392	0.209869	0.462667
4930404N11Rik	90.8699	0.0998598	0.25295	0.394781	0.693004	0.846617
4930413G21Rik	166.276	-0.178367	0.206554	-0.863537	0.387843	0.641316
4930414L22Rik	61.8551	0.000719244	0.33805	0.00212762	0.998302	0.999019
4930422G04Rik	80.6362	0.0240156	0.205425	0.116907	0.906934	0.958593
4930427A07Rik	182.922	0.232222	0.142431	1.63042	0.103014	0.315529
4930430F08Rik	37.7146	0.15529	0.214452	0.724126	0.468988	0.699308
4930444A02Rik	129.891	0.300594	0.212258	1.41617	0.156725	0.394913
4930452B06Rik	49.7885	-0.0980692	0.179725	-0.545662	0.585299	0.779154
4930453N24Rik	273.486	0.118228	0.110114	1.07369	0.282962	0.543533
4930455F23Rik	85.51	0.123231	0.143772	0.857125	0.391376	0.644644
4930481A15Rik	43.5865	-0.0846809	0.20902	-0.405134	0.685379	0.840656
4930483K19Rik	38.9866	0.22198	0.161475	1.3747	0.169225	0.411065
4930503L19Rik	160.552	-0.0441532	0.129983	-0.339684	0.734094	0.86892
4930506M07Rik	703.827	0.176646	0.146701	1.20412	0.228541	0.483268
4930523C07Rik	452.566	-0.197204	0.144617	-1.36363	0.172685	0.415086
4930526I15Rik	206.044	0.188902	0.162006	1.16602	0.243607	0.502111
4930539E08Rik	1477.61	-0.197781	0.292122	-0.677049	0.498375	0.719563
4930539J05Rik	66.5438	-0.112622	0.197376	-0.570596	0.568273	0.76807
4930577N17Rik	30.7798	0.00845345	0.175879	0.048064	0.961665	0.983031
4930579G18Rik	38.603	-0.161058	0.296162	-0.543818	0.586567	0.780153
4930579G24Rik	81.8347	-0.080391	0.172364	-0.466402	0.640928	0.814302
4931406C07Rik	2329.37	-0.00934643	0.263356	-0.0354897	0.971689	0.987112
4931406P16Rik	1007.68	-0.260461	0.129732	-2.00769	0.0446762	0.198303
4931414P19Rik	58.7806	0.10044	0.228902	0.438791	0.660813	0.82626
4931428F04Rik	58.9194	-0.103337	0.148186	-0.697351	0.485583	0.711245
4932415G12Rik	106.417	0.0236355	0.234004	0.101005	0.919547	0.963927
4932416H05Rik	29.1861	-0.306722	0.314412	-0.975541	0.329292	0.587714
4932438A13Rik	1340.14	-0.481554	0.244744	-1.96759	0.0491157	0.20926
4933404O12Rik	52.3153	-0.150503	0.229924	-0.654575	0.512741	0.729848
4933406C10Rik	28.9752	0.00350463	0.282733	0.0123956	0.99011	0.995158
4933407K13Rik	43.4198	-0.0326527	0.283314	-0.115253	0.908245	0.959139
4933411K20Rik	154.78	0.0824505	0.197084	0.418352	0.67569	0.834751
4933412E12Rik	48.046	0.405441	0.263942	1.5361	0.124514	0.347918
4933413J09Rik	37.1447	-1.76734	0.642812	-2.74939	0.00597067	0.069743
4933421O10Rik	58.375	-0.200171	0.215902	-0.92714	0.353854	0.610405
4933426M11Rik	4057.43	-0.320985	0.0910957	-3.5236	0.000425724	0.0206309
4933427D14Rik	189.47	-0.061484	0.0965496	-0.636812	0.524247	0.738222
4933431E20Rik	375.526	-0.218157	0.193218	-1.12907	0.258867	0.52015
4933434E20Rik	395.592	0.135382	0.0939264	1.44136	0.149482	0.386348
4933439C10Rik	78.9198	-0.0934778	0.344436	-0.271394	0.786088	0.898769
5031425E22Rik	82.8214	-0.20097	0.173481	-1.15845	0.246679	0.505694
5031439G07Rik	1007.44	-0.0652016	0.0957009	-0.681306	0.495678	0.718178
5033404E19Rik	255.125	0.330818	0.203366	1.62671	0.103798	0.316573
5033406O09Rik	61.3094	0.121528	0.18121	0.670645	0.502446	0.72191
5033411D12Rik	46.4622	0.132055	0.24639	0.535961	0.591986	0.784634
5330417C22Rik	2946.4	0.014878	0.192224	0.0773997	0.938306	0.972572
5330426P16Rik	54.8559	-0.198182	0.165545	-1.19715	0.231248	0.486987
5430416N02Rik	157.443	0.201829	0.13488	1.49635	0.134561	0.36376
5430417L22Rik	1088.11	-0.236446	0.305936	-0.772864	0.439603	0.679696
5430435G22Rik	212.732	-0.159763	0.171318	-0.932556	0.351049	0.607343
5530601H04Rik	51.4138	-0.0399656	0.186083	-0.214773	0.829944	0.919069
5730409E04Rik	128.131	-0.417861	0.305735	-1.36674	0.171706	0.413677
5730455P16Rik	254.2	-0.07817	0.166369	-0.469859	0.638456	0.813261
5730507C01Rik	27.9356	0.523551	0.264422	1.97998	0.0477056	0.20608
5730508B09Rik	288.433	0.155596	0.104657	1.48672	0.13709	0.367279
5730559C18Rik	1766.63	0.211841	0.189615	1.11722	0.263901	0.524286
5830415F09Rik	43.7794	0.46771	0.18683	2.5034	0.0123005	0.0989823
5830417I10Rik	197.461	0.0819523	0.0920652	0.890155	0.373383	0.627421
5830418K08Rik	287.782	-0.00176843	0.107536	-0.0164451	0.986879	0.993945
5930403L14Rik	45.0354	-0.244277	0.411926	-0.593011	0.553174	0.757762
6030419C18Rik	205.67	-0.244844	0.157636	-1.55323	0.120369	0.341488
6030458C11Rik	360.49	0.266388	0.138574	1.92235	0.0545616	0.220905
6330403A02Rik	1558.95	-0.512136	0.293266	-1.74632	0.0807552	0.275457
6330403K07Rik	196.301	-0.643841	0.28105	-2.29084	0.0219726	0.137395
6330403M23Rik	162.575	-0.0654986	0.220187	-0.297468	0.766109	0.887732
6330408A02Rik	72.9057	0.102943	0.124337	0.827937	0.407706	0.655392
6330416G13Rik	403.713	0.158381	0.141312	1.12079	0.262377	0.52331
6430548M08Rik	1207.27	-0.291455	0.138061	-2.11106	0.0347674	0.173491
6530402F18Rik	39.4667	-0.0985352	0.218471	-0.451023	0.651973	0.821109
6720401G13Rik	1200.93	-0.237332	0.214412	-1.1069	0.268338	0.529072
6720456H20Rik	270.19	-0.00836137	0.114684	-0.0729077	0.94188	0.974282
6820431F20Rik	43.9677	0.160722	0.206558	0.778096	0.436513	0.677306
8030462N17Rik	412.618	-0.175375	0.171299	-1.02379	0.305934	0.565638
8430408G22Rik	1143.55	0.166802	0.295688	0.564114	0.572676	0.770276
8430410A17Rik	331.395	0.0855017	0.108363	0.789034	0.430092	0.672418
8430419L09Rik	124.578	-0.233855	0.166883	-1.40131	0.161122	0.400417
8430427H17Rik	1958.14	-0.106532	0.186267	-0.571931	0.567369	0.767407
8430429K09Rik	38.15	0.0902145	0.177037	0.50958	0.610346	0.795437
9030617O03Rik	273.114	0.0680592	0.121613	0.559639	0.575726	0.772413
9030624J02Rik	666.486	0.0443557	0.0766861	0.578406	0.56299	0.763616
9130008F23Rik	297.372	0.185087	0.320101	0.578215	0.563119	0.763714
9130011E15Rik	328.774	0.00479483	0.0991866	0.0483416	0.961444	0.983031
9130017N09Rik	4091.24	0.140721	0.205553	0.684596	0.493599	0.717093
9130019O22Rik	54.2085	-0.250433	0.14795	-1.69268	0.0905163	0.293972
9130023H24Rik	44.1837	0.177454	0.332393	0.533867	0.593433	0.785513
9130024F11Rik	168.263	0.0517976	0.12033	0.430464	0.666858	0.829842
9130206I24Rik	538.136	0.146804	0.141693	1.03607	0.300168	0.559426
9130221H12Rik	58.935	0.158262	0.258277	0.612763	0.540033	0.747509
9130401M01Rik	250.565	0.225674	0.112609	2.00406	0.045064	0.199344
9230105E05Rik	104.504	0.146633	0.228352	0.642135	0.520785	0.735562
9230110C19Rik	31.0598	-0.320642	0.198503	-1.6153	0.106245	0.320521
9330133O14Rik	85.7883	0.108801	0.134064	0.811565	0.417042	0.6621
9330151L19Rik	34.1011	0.147907	0.38516	0.384015	0.700967	0.851744
9330159F19Rik	61.0597	-1.08568	0.296591	-3.66053	0.000251691	0.0166143
9330182L06Rik	131.412	-0.773	0.241179	-3.20508	0.00135023	0.0347652
9430008C03Rik	295.612	0.200761	0.160412	1.25153	0.21074	0.463458
9430015G10Rik	133.352	0.0573482	0.20067	0.285783	0.775044	0.892824
9430016H08Rik	270.909	0.310283	0.0919574	3.3742	0.000740313	0.0261322
9430020K01Rik	1025.15	-0.00831748	0.16086	-0.0517064	0.958763	0.981945
9430023L20Rik	456.997	0.044955	0.189167	0.237647	0.812155	0.912111
9430038I01Rik	120.126	0.340155	0.146004	2.32976	0.0198187	0.130291
9430091E24Rik	28.5118	-0.143086	0.240766	-0.594293	0.552316	0.756932
9530068E07Rik	4560.49	-0.131111	0.108217	-1.21156	0.225681	0.480356
9530082P21Rik	336.437	-0.0952862	0.203551	-0.468119	0.639699	0.813961
9630028B13Rik	45.8799	0.0128197	0.37103	0.0345515	0.972437	0.987502
9630033F20Rik	268.455	0.0701805	0.10171	0.690003	0.490192	0.715284
9830001H06Rik	1955.86	-0.674662	0.234048	-2.88257	0.00394441	0.0580005
9830147E19Rik	48.4537	0.360144	0.183649	1.96104	0.0498746	0.211154
9930012K11Rik	26.4343	-0.571206	0.34419	-1.65957	0.0970012	0.305598
9930013L23Rik	468.174	-0.365264	0.5787	-0.631181	0.527922	0.74019
9930014A18Rik	63.9792	0.661769	0.211623	3.12712	0.0017653	0.0399222
9930021J03Rik	873.497	-0.377698	0.259243	-1.45693	0.145136	0.379305
9930104L06Rik	180.878	0.126064	0.190245	0.662641	0.50756	0.726262
A030009H04Rik	45.4272	-0.364122	0.191881	-1.89764	0.0577431	0.227155
A130010J15Rik	130.69	-0.144186	0.138339	-1.04227	0.297288	0.556956
A1cf	351.897	-0.204042	0.274096	-0.74442	0.456623	0.692262
A230046K03Rik	638.473	0.0434979	0.091837	0.473643	0.635755	0.811376
A230050P20Rik	130.46	0.138434	0.21783	0.635516	0.525092	0.739028
A330021E22Rik	50.7688	-0.278751	0.211839	-1.31586	0.188219	0.435576
A330035P11Rik	38.0673	-0.219272	0.211976	-1.03442	0.300941	0.560224
A3galt2	34.5728	-2.05494	0.666793	-3.08183	0.00205735	0.0428002
A430005L14Rik	225.677	0.468408	0.190814	2.45479	0.0140967	0.107159
A430033K04Rik	74.0121	0.314952	0.229306	1.3735	0.169598	0.411428
A430105I19Rik	390.684	-0.00422273	0.229702	-0.0183835	0.985333	0.993312
A4galt	646.795	0.409247	0.313232	1.30653	0.191373	0.439677
A4gnt	138.869	-0.267427	0.331658	-0.806334	0.42005	0.663832
A530054K11Rik	102.026	0.189146	0.197667	0.956892	0.338622	0.594616
A630007B06Rik	458.624	-0.468109	0.285592	-1.63908	0.101196	0.312856
A630072M18Rik	42.1834	-0.103956	0.223108	-0.465945	0.641255	0.814641
A730017C20Rik	107.257	-0.815567	0.353946	-2.30421	0.0212108	0.135058
A730017L22Rik	77.7892	0.0567858	0.204349	0.277886	0.7811	0.896679
A830010M20Rik	169.102	-0.405687	0.188232	-2.15525	0.0311426	0.164704
A830080D01Rik	152.891	0.026488	0.115762	0.228814	0.819014	0.915037
A930005H10Rik	40.8243	0.181471	0.178313	1.01771	0.308815	0.568012
A930015D03Rik	58.9764	-0.176639	0.19646	-0.89911	0.368594	0.622846
AA414768	64.241	0.087648	0.254635	0.34421	0.730688	0.867962
AA415398	28.9386	-0.292628	0.243244	-1.20302	0.228968	0.483865
AA467197	1737.4	0.0312411	0.241165	0.129543	0.896928	0.954094
AA986860	640.141	-0.379623	0.370591	-1.02437	0.30566	0.565286
AA987161	118.258	0.111013	0.147677	0.751729	0.452214	0.68883
Aaas	240.282	0.263208	0.133212	1.97586	0.0481711	0.206977
Aacs	1278.18	0.135347	0.0969261	1.39639	0.162597	0.402533
Aadac	413.663	0.15565	0.149966	1.0379	0.299315	0.558465
Aaed1	261.948	-0.00920726	0.0899208	-0.102393	0.918445	0.963685
Aagab	634.667	0.0197495	0.0813463	0.242783	0.808173	0.909597
Aak1	1571.53	-0.501665	0.194452	-2.57988	0.00988336	0.0894712
Aamdc	373.223	0.120813	0.156291	0.773002	0.439521	0.679696
Aamp	2269.84	-0.0237545	0.0641906	-0.370061	0.711337	0.858349
Aar2	344.761	0.119752	0.146977	0.81477	0.415204	0.661023
Aard	59.8675	-0.0393798	0.246416	-0.15981	0.873031	0.941338
Aars	2968.77	0.198699	0.155435	1.27834	0.20113	0.451246
Aars2	238.673	0.162512	0.0975119	1.66659	0.0955969	0.303215
Aarsd1	347.211	0.171847	0.138564	1.2402	0.214903	0.468436
Aasdh	73.7866	-0.0573813	0.14663	-0.391335	0.69555	0.848352
Aasdhppt	358.437	0.208747	0.0942711	2.21433	0.0268063	0.152446
Aatf	346.728	0.35834	0.0897162	3.99415	6.49259e-05	0.00908227
Aatk	293.701	-0.619654	0.282545	-2.19312	0.0282989	0.156347
Abat	980.847	-0.237081	0.151104	-1.56899	0.11665	0.336374
Abca1	808.453	-0.584903	0.275742	-2.1212	0.0339052	0.171675
Abca12	323.059	0.470412	0.618515	0.76055	0.446926	0.684597
Abca2	375.218	-0.541334	0.190773	-2.83758	0.00454569	0.0616003
Abca3	930.035	-0.0993565	0.112264	-0.885023	0.376144	0.630171
Abca5	220.711	-0.38676	0.130617	-2.96103	0.0030661	0.0507365
Abca6	27.2596	-0.973069	0.314103	-3.09793	0.00194875	0.0418118
Abca7	670.856	-0.211556	0.0672	-3.14816	0.00164302	0.0387233
Abca8a	244.187	-0.692985	0.308726	-2.24466	0.0247901	0.146125
Abca8b	101.978	-0.6928	0.220747	-3.13843	0.00169855	0.0393304
Abca9	160.553	-0.503427	0.17703	-2.84375	0.00445867	0.0612344
Abcb10	449.133	0.112744	0.0745067	1.5132	0.130229	0.356553
Abcb1a	3584.28	-0.165029	0.350692	-0.470582	0.637939	0.812865
Abcb1b	87.4785	-0.230981	0.258654	-0.893013	0.37185	0.625932
Abcb6	598.826	-0.0267888	0.122379	-0.218901	0.826727	0.917772
Abcb7	724.817	0.0959285	0.118238	0.81132	0.417182	0.6621
Abcb8	613.228	0.113005	0.0800247	1.41212	0.157914	0.396267
Abcb9	98.8119	-0.14384	0.178477	-0.805928	0.420285	0.664048
Abcc1	1029.6	0.0201755	0.175603	0.114893	0.90853	0.959142
Abcc10	429.707	-0.0437258	0.158289	-0.27624	0.782364	0.897441
Abcc2	31.1377	0.0792452	0.232432	0.340939	0.733149	0.868906
Abcc3	1493.54	0.0481569	0.21082	0.228427	0.819314	0.915037
Abcc4	277.649	-0.012859	0.11976	-0.107373	0.914493	0.962188
Abcc5	501.859	-0.458878	0.122596	-3.74301	0.000181831	0.0139936
Abcc6	160.687	-0.0430152	0.247242	-0.17398	0.861881	0.935889
Abcc8	74.0215	0.03376	0.23588	0.143123	0.886193	0.947329
Abcc9	1217.81	-0.427565	0.129719	-3.29608	0.000980428	0.0299136
Abcd1	364.797	0.0405689	0.112701	0.359968	0.718871	0.862226
Abcd3	2202.83	0.110742	0.13552	0.817166	0.413834	0.66078
Abcd4	189.251	0.114171	0.163873	0.696706	0.485987	0.711366
Abce1	2415.58	0.170544	0.117566	1.45063	0.146883	0.381372
Abcf1	1905.65	0.161409	0.045412	3.55432	0.000378956	0.0191868
Abcf2	1063.22	0.172249	0.0798068	2.15833	0.0309021	0.163986
Abcf3	622.284	0.240831	0.0714984	3.36834	0.000756231	0.0261322
Abcg1	286.014	-0.312149	0.207684	-1.50299	0.13284	0.360588
Abcg2	1100.98	0.0651271	0.183559	0.354802	0.722738	0.864343
Abcg4	75.2369	-0.659347	0.296358	-2.22483	0.0260926	0.149958
Abhd10	225.242	-0.00867138	0.100763	-0.0860571	0.931421	0.970492
Abhd11	691.753	0.18523	0.0746332	2.48187	0.0130696	0.102585
Abhd12	637.482	-0.043619	0.0901621	-0.483784	0.628539	0.8075
Abhd13	1068.15	0.104859	0.127164	0.824594	0.409602	0.657194
Abhd14a	261.529	0.0879509	0.138792	0.633687	0.526285	0.739328
Abhd14b	749.772	0.10854	0.0770515	1.40866	0.158935	0.397674
Abhd16a	1023.58	-0.00259998	0.0897601	-0.0289659	0.976892	0.989286
Abhd2	3157.8	-0.210288	0.281507	-0.747006	0.45506	0.69107
Abhd3	45.0346	-0.0551921	0.292026	-0.188997	0.850095	0.929412
Abhd4	1133.75	0.0194511	0.103099	0.188663	0.850357	0.929549
Abhd5	553.795	0.05954	0.0933684	0.637689	0.523676	0.737724
Abhd6	710.831	-0.0562771	0.171804	-0.327565	0.743241	0.874981
Abhd8	492.029	-0.337653	0.179036	-1.88595	0.0593015	0.230433
Abi1	2801.17	-0.0601861	0.152004	-0.39595	0.692142	0.845944
Abi2	627.583	-0.386961	0.105835	-3.65628	0.000255906	0.0166143
Abi3	106.56	0.148482	0.175581	0.845659	0.397743	0.648441
Abi3bp	1449.57	-0.452205	0.167321	-2.70262	0.00687959	0.0742332
Abl1	2915.21	-0.29063	0.0877296	-3.3128	0.000923686	0.029083
Abl2	1613.99	-0.498451	0.319318	-1.56099	0.118527	0.338644
Ablim1	1905.51	-0.283796	0.206533	-1.3741	0.169412	0.411144
Ablim2	412.32	-0.295254	0.145238	-2.03289	0.0420631	0.192043
Ablim3	166.651	-0.438223	0.171824	-2.55042	0.0107594	0.0931682
Abo	42.6618	0.0325707	0.329433	0.098869	0.921242	0.96483
Abp1	1310.94	0.0734853	0.270207	0.27196	0.785653	0.898693
Abr	2324.44	-0.211447	0.109549	-1.93016	0.0535864	0.218831
Abracl	696.213	0.17306	0.0673343	2.57017	0.0101649	0.0905073
Abt1	218.633	0.178403	0.0993415	1.79585	0.0725178	0.260205
Abtb1	214.336	0.0596344	0.177709	0.335574	0.737192	0.870883
Abtb2	569.082	-0.441378	0.305321	-1.44562	0.148284	0.384275
Acaa1a	927.58	0.144821	0.0928358	1.55997	0.118767	0.338976
Acaa1b	236.059	0.0375007	0.432505	0.0867058	0.930905	0.970083
Acaa2	2331.04	0.147864	0.136077	1.08662	0.277203	0.538416
Acaca	554.174	-0.165091	0.0811494	-2.03441	0.0419101	0.191603
Acacb	416.234	-0.341623	0.19894	-1.71722	0.0859397	0.286093
Acad10	164.742	0.17011	0.106758	1.59341	0.111068	0.329344
Acad11	830.246	-0.0545298	0.194185	-0.280813	0.778854	0.894933
Acad12	63.8448	-0.201092	0.157644	-1.27561	0.202093	0.452371
Acad8	402.052	0.0965525	0.0745242	1.29559	0.195118	0.444744
Acad9	470.019	0.287004	0.0944677	3.03812	0.00238062	0.0447259
Acadl	2913.35	0.219477	0.114415	1.91826	0.0550777	0.221568
Acadm	1413.28	0.00223449	0.113673	0.0196572	0.984317	0.992878
Acads	3120.19	0.232711	0.104327	2.23059	0.025708	0.148907
Acadsb	673.318	-0.088783	0.0909395	-0.976286	0.328923	0.587643
Acadvl	2741.41	0.162667	0.102489	1.58717	0.112475	0.3306
Acap1	31.9394	0.218495	0.250775	0.871281	0.383601	0.636629
Acap2	1761.78	-0.340471	0.137964	-2.46783	0.0135935	0.104445
Acap3	554.913	-0.220855	0.113177	-1.95141	0.0510086	0.213424
Acat1	3849.56	0.166645	0.0788867	2.11246	0.0346473	0.173376
Acat2	487.352	0.0803738	0.0932834	0.861608	0.388903	0.642365
Acbd3	2101.6	-0.149672	0.1552	-0.964377	0.334857	0.591933
Acbd4	152.783	-0.0190306	0.186955	-0.101793	0.918921	0.963927
Acbd5	886.392	-0.121474	0.100826	-1.2048	0.228282	0.483268
Acbd6	531.096	0.179413	0.0857703	2.09179	0.0364573	0.177435
Accs	47.5023	0.135525	0.276201	0.490675	0.623657	0.804487
Acd	316.531	0.0234387	0.0972948	0.240904	0.809629	0.910707
Ace	610.05	-0.0528597	0.14863	-0.355645	0.722106	0.864042
Ace2	987.666	0.130984	0.376668	0.347745	0.728032	0.866322
Acer1	292.883	0.0642995	0.148201	0.433868	0.664385	0.827903
Acer2	189.909	-0.116266	0.164099	-0.708511	0.478628	0.705633
Acer3	384.501	-0.0761583	0.0782174	-0.973675	0.330218	0.588485
Ache	462.967	-0.725811	0.268546	-2.70274	0.00687705	0.0742332
Acin1	2608.37	-0.0745518	0.0963456	-0.773796	0.439051	0.679381
Acly	3921.1	-0.0404963	0.0910599	-0.444722	0.656521	0.824034
Acn9	47.7291	0.351959	0.203991	1.72536	0.0844621	0.283399
Acnat1	385.762	-0.189709	0.102498	-1.85085	0.0641905	0.242472
Aco1	1650.52	0.0945515	0.0697154	1.35625	0.17502	0.417973
Aco2	6451.93	0.0801951	0.105214	0.76221	0.445935	0.684022
Acot1	183.77	0.367914	0.135196	2.72134	0.00650175	0.0721949
Acot11	426.899	0.120841	0.106481	1.13486	0.256434	0.51766
Acot13	428.346	0.152196	0.0944198	1.6119	0.106983	0.321875
Acot2	140.803	0.083561	0.245769	0.339999	0.733858	0.86892
Acot4	96.1882	0.00774285	0.236689	0.0327132	0.973903	0.988473
Acot7	1180.4	-0.0676201	0.16528	-0.409124	0.682449	0.838818
Acot8	378.352	0.268119	0.13105	2.04593	0.0407631	0.188302
Acot9	731.405	-0.0997445	0.146683	-0.679999	0.496505	0.718524
Acox1	4978.04	-0.114035	0.185509	-0.614716	0.538742	0.746609
Acox2	136.369	0.13265	0.174919	0.758354	0.448239	0.685516
Acox3	410.786	-0.0706643	0.0895999	-0.788665	0.430308	0.672618
Acp1	489.304	0.233291	0.0768602	3.03527	0.00240323	0.0447259
Acp2	421.123	-0.0109479	0.113656	-0.0963254	0.923262	0.965827
Acp5	2408.8	0.126049	0.193913	0.650027	0.515675	0.73093
Acp6	463.7	0.160478	0.110608	1.45087	0.146817	0.381346
Acpl2	650.636	-0.172545	0.164963	-1.04596	0.295579	0.555578
Acpp	194.518	0.201135	0.163223	1.23227	0.21785	0.471479
Acrbp	52.5767	-0.486401	0.230577	-2.1095	0.0349015	0.173854
Acsf2	2033.49	0.202802	0.144297	1.40545	0.159888	0.399069
Acsf3	376.685	0.215162	0.0850924	2.52857	0.0114527	0.0959866
Acsl1	629.583	-0.0512972	0.165293	-0.310341	0.756301	0.882623
Acsl3	4300.12	-0.352808	0.322815	-1.09291	0.274433	0.535472
Acsl4	1831.04	-0.128964	0.199236	-0.647294	0.517442	0.73244
Acsl5	1859.77	0.203185	0.0970466	2.09368	0.0362885	0.177
Acsl6	36.4184	-0.485849	0.292449	-1.66131	0.0966505	0.30513
Acsm3	797.068	-0.0500442	0.248469	-0.20141	0.840378	0.9246
Acss1	1087.54	0.0177956	0.133293	0.133508	0.893792	0.951951
Acss2	995.762	0.149548	0.140052	1.06781	0.285608	0.54668
Acta1	1992.58	0.86983	0.351212	2.47665	0.0132621	0.103303
Acta2	47119.1	-0.291345	0.228173	-1.27686	0.201651	0.451766
Actb	69631	0.28936	0.114286	2.53189	0.011345	0.0955554
Actc1	102.788	-0.0684453	0.256032	-0.267331	0.789214	0.900251
Actg1	12181.7	0.298793	0.110058	2.71486	0.00663034	0.07273
Actg2	44875.7	-0.314379	0.289636	-1.08543	0.277732	0.53867
Actl6a	644.949	0.232555	0.0786209	2.95793	0.00309709	0.0510625
Actl6b	28.4664	-0.735316	0.393715	-1.86763	0.0618134	0.236533
Actn1	9021.56	-0.135237	0.09827	-1.37618	0.168767	0.410727
Actn4	17512.9	-0.0355615	0.148348	-0.239718	0.810549	0.911354
Actr10	1228.98	0.0264931	0.0720649	0.367629	0.71315	0.859009
Actr1a	2774.31	-0.00524592	0.0620125	-0.0845945	0.932584	0.97064
Actr1b	2239.44	-0.0831903	0.0647787	-1.28422	0.199064	0.448912
Actr2	4608.32	0.0704588	0.126371	0.557558	0.577146	0.773052
Actr3	5451.54	0.0519499	0.139305	0.372922	0.709207	0.857379
Actr5	116.118	0.306156	0.146751	2.08622	0.0369584	0.178915
Actr6	74.3724	0.271689	0.178859	1.51901	0.12876	0.354461
Actr8	449.555	0.0346322	0.0767519	0.451223	0.651829	0.821074
Acvr1	953.221	-0.163785	0.13772	-1.18927	0.234335	0.490845
Acvr1b	1267.43	-0.0740265	0.173432	-0.426832	0.669502	0.83153
Acvr1c	143.086	-0.226936	0.193399	-1.17341	0.240632	0.499181
Acvr2a	790.975	-0.139654	0.176097	-0.793052	0.427748	0.670375
Acvr2b	30.921	0.1355	0.209492	0.646802	0.51776	0.732585
Acvrl1	1204.52	0.032802	0.106461	0.308113	0.757997	0.883503
Acy1	285.913	0.151552	0.116249	1.30368	0.192341	0.441048
Acy3	131.062	0.153428	0.124635	1.23101	0.218318	0.471939
Acyp1	93.0583	-0.174289	0.160488	-1.086	0.277481	0.53867
Acyp2	92.7198	-0.150802	0.146587	-1.02875	0.303597	0.563026
Ada	154.082	0.24183	0.150273	1.60927	0.107558	0.323101
Adal	94.9189	0.118978	0.179647	0.662287	0.507787	0.726504
Adam10	2521.91	0.103466	0.145805	0.709619	0.477941	0.70523
Adam11	200.793	-0.509948	0.364154	-1.40036	0.161404	0.400896
Adam12	195.825	-0.50527	0.162095	-3.11713	0.00182621	0.0406227
Adam15	1420.82	-0.0056812	0.0792384	-0.0716976	0.942843	0.974515
Adam17	764.357	0.0148846	0.0599611	0.248237	0.803951	0.907404
Adam19	2431.2	0.058949	0.207298	0.284368	0.776128	0.893177
Adam22	167.426	-0.868198	0.255675	-3.3957	0.000684522	0.0253541
Adam23	378.952	-0.541347	0.221031	-2.44919	0.0143178	0.107992
Adam33	148.981	-0.849212	0.363287	-2.33758	0.0194092	0.128867
Adam8	167.411	0.225453	0.263103	0.8569	0.3915	0.644693
Adam9	2208.4	-0.11459	0.117844	-0.972382	0.33086	0.589105
Adamdec1	25535	0.0502597	0.178089	0.282216	0.777778	0.894
Adamts1	3583.64	-0.425798	0.17735	-2.4009	0.016355	0.116985
Adamts10	657.63	-0.125227	0.261977	-0.478007	0.632646	0.80976
Adamts12	261.517	-0.586787	0.179429	-3.2703	0.00107434	0.0311765
Adamts14	203.945	0.0686164	0.162014	0.423522	0.671914	0.832926
Adamts15	116.097	-0.0896595	0.261766	-0.342518	0.731961	0.868332
Adamts17	417.924	-0.237888	0.185728	-1.28084	0.200249	0.450288
Adamts18	67.5413	-0.461911	0.184197	-2.5077	0.0121521	0.0983841
Adamts19	360.507	-0.485064	0.138881	-3.49265	0.000478251	0.0216273
Adamts2	832.088	-0.201454	0.11632	-1.7319	0.0832907	0.280509
Adamts20	27.96	-0.463163	0.24208	-1.91327	0.0557137	0.222916
Adamts3	116.164	-0.207029	0.123236	-1.67994	0.0929692	0.29865
Adamts4	4571.5	-0.162833	0.287251	-0.566867	0.570804	0.769584
Adamts5	246.872	-0.629505	0.166197	-3.78771	0.000152042	0.0130474
Adamts6	54.3692	-0.320947	0.234627	-1.3679	0.171342	0.413397
Adamts7	416.469	-0.125973	0.11632	-1.08299	0.278812	0.539157
Adamts8	252.468	-0.14627	0.235251	-0.621761	0.534099	0.744374
Adamts9	1898.93	-0.714924	0.242754	-2.94506	0.0032289	0.0518496
Adamtsl1	265.649	-0.691967	0.198159	-3.49198	0.000479461	0.0216273
Adamtsl3	132.873	-0.901602	0.207205	-4.35125	1.35364e-05	0.00402192
Adamtsl4	365.24	-0.298099	0.1606	-1.85616	0.0634303	0.240684
Adamtsl5	195.382	-0.0685909	0.1923	-0.356688	0.721325	0.863541
Adap1	490.975	0.0295545	0.114794	0.257457	0.796826	0.903647
Adap2	75.384	-0.241491	0.180236	-1.33986	0.18029	0.42501
Adar	1260.1	-0.00340215	0.0994466	-0.0342108	0.972709	0.987556
Adarb1	256.627	-0.520421	0.219684	-2.36896	0.0178384	0.122681
Adat1	30.9836	0.16249	0.266494	0.609732	0.54204	0.749051
Adat2	62.5317	0.480331	0.172157	2.79008	0.00526945	0.0664799
Adat3	77.5783	-0.0161111	0.164403	-0.0979979	0.921934	0.965256
Adc	143.463	0.0430732	0.316377	0.136145	0.891707	0.950925
Adck1	139.531	0.145682	0.146604	0.993711	0.320364	0.579315
Adck2	302.117	0.0874148	0.10378	0.842311	0.399614	0.650007
Adck3	315.096	0.0112663	0.163105	0.0690737	0.944931	0.975174
Adck4	343.35	0.122448	0.087417	1.40073	0.161295	0.400698
Adck5	574.678	0.126715	0.131113	0.96646	0.333814	0.591098
Adcy1	325.2	-0.60213	0.199439	-3.01911	0.00253517	0.0461123
Adcy2	207.589	-0.136977	0.156574	-0.87484	0.381661	0.635363
Adcy3	164.975	-0.317844	0.184273	-1.72485	0.0845542	0.283588
Adcy4	173.239	0.0684999	0.15724	0.435639	0.663099	0.827592
Adcy5	940.124	-0.62864	0.184996	-3.39813	0.00067849	0.0253067
Adcy6	3706.26	-0.144188	0.070336	-2.04999	0.0403653	0.18751
Adcy7	145.236	-0.304274	0.152084	-2.0007	0.0454249	0.200446
Adcy9	201.798	-0.269767	0.171867	-1.56963	0.116502	0.336374
Adcyap1	26.679	-0.649195	0.30888	-2.10178	0.035573	0.175582
Adcyap1r1	469.882	-0.48585	0.304239	-1.59693	0.11028	0.328157
Add1	3797.8	-0.00658642	0.0584826	-0.112622	0.91033	0.960369
Add2	217.547	-0.810279	0.317873	-2.54907	0.0108011	0.09335
Add3	1355.21	-0.0983471	0.0891638	-1.10299	0.27003	0.530866
Adh1	1101.77	0.0648122	0.35471	0.182719	0.855019	0.93184
Adh5	1547.34	0.216255	0.122534	1.76486	0.0775878	0.269946
Adhfe1	36.1581	0.057976	0.354773	0.163417	0.87019	0.940021
Adi1	331.296	0.202612	0.128735	1.57387	0.115517	0.335007
Adipor1	2941.2	0.0719796	0.0795875	0.904408	0.365779	0.620019
Adipor2	3249.62	-0.124085	0.196085	-0.632813	0.526856	0.739653
Adk	1719.96	0.0897541	0.11009	0.815278	0.414913	0.661023
Adm	1499.37	0.248498	0.247076	1.00575	0.314534	0.573899
Adnp	1686.92	-0.180776	0.16848	-1.07298	0.28328	0.543902
Adnp2	417.187	-0.0313852	0.136252	-0.230346	0.817823	0.914691
Ado	696.686	0.148891	0.0940465	1.58317	0.113383	0.331787
Adora1	232.352	-0.335394	0.190361	-1.76188	0.0780894	0.271083
Adora2a	123.045	-0.0235914	0.202419	-0.116548	0.907219	0.958727
Adora2b	37.8737	0.458576	0.275028	1.66738	0.095439	0.302785
Adpgk	396.875	0.247764	0.127332	1.94581	0.0516781	0.214506
Adprh	770.044	0.146595	0.100822	1.45399	0.145949	0.380549
Adprhl2	285.427	0.344136	0.140534	2.44878	0.0143342	0.108056
Adprm	166.453	0.0287124	0.0907545	0.316375	0.751718	0.879392
Adra1b	27.6642	0.477375	0.262644	1.81758	0.0691288	0.253225
Adra2a	845.836	-0.324149	0.157775	-2.0545	0.039927	0.18671
Adrb1	106.102	-0.154388	0.204944	-0.753317	0.451259	0.687996
Adrb2	30.0004	0.01143	0.295881	0.0386304	0.969185	0.98606
Adrbk1	2510.59	0.053836	0.0540608	0.995842	0.319327	0.578631
Adrbk2	540.878	-0.565249	0.131202	-4.30824	1.64556e-05	0.00405975
Adrm1	948.357	0.110995	0.124903	0.888644	0.374195	0.628319
Adsl	544.218	0.302546	0.112096	2.699	0.00695487	0.0747787
Adss	1837.11	0.112667	0.135489	0.831556	0.405659	0.653961
Adssl1	34.1242	0.388094	0.262836	1.47657	0.139792	0.371056
Adtrp	539.848	0.11161	0.221775	0.503257	0.614783	0.798779
Aebp1	1289.49	-0.195495	0.167191	-1.1693	0.242284	0.500589
Aebp2	1889.28	-0.106598	0.125768	-0.847571	0.396677	0.647443
Aen	515.862	0.406816	0.175694	2.31548	0.0205868	0.132957
Aes	7384.76	0.0503863	0.0719544	0.700254	0.483769	0.709752
AF251705	36.2514	0.498191	0.283279	1.75866	0.0786351	0.271978
Afap1	1026.37	-0.206816	0.11937	-1.73256	0.0831732	0.280392
Afap1l1	640.565	-0.254222	0.127238	-1.99801	0.0457152	0.201282
Afap1l2	496.362	-0.177295	0.121376	-1.46071	0.144095	0.377966
Aff1	3019.05	-0.477826	0.178258	-2.68053	0.00735061	0.0771985
Aff3	206.518	-0.407826	0.155211	-2.62755	0.00860014	0.0836846
Aff4	4997.61	-0.565188	0.257976	-2.19086	0.0284621	0.156762
Afg3l1	727.083	0.117994	0.0688125	1.71472	0.0863964	0.286699
Afg3l2	2076.49	0.00573692	0.0639316	0.0897352	0.928498	0.96869
Afm	198.945	0.158499	0.202898	0.781176	0.434699	0.67627
Afmid	181.91	-0.28959	0.152882	-1.8942	0.0581979	0.228299
Aftph	1929.13	-0.228141	0.195352	-1.16785	0.242869	0.501139
Aga	395.266	0.0979631	0.110128	0.889541	0.373713	0.627898
Agap1	1099.37	-0.335034	0.0847666	-3.95243	7.73614e-05	0.00976518
Agap2	221.927	-0.387053	0.199421	-1.94088	0.0522731	0.215722
Agap3	1254.96	-0.132454	0.0803535	-1.64839	0.0992719	0.309091
Agbl2	26.5367	-0.728475	0.276656	-2.63314	0.00845989	0.0828227
Agbl5	260.861	0.0595097	0.109167	0.545124	0.585668	0.779343
Ager	49.4771	-0.484092	0.215139	-2.25014	0.0244403	0.144943
Agfg1	1421.23	-0.0962257	0.173557	-0.554432	0.579283	0.774652
Agfg2	610.825	-0.1984	0.129209	-1.5355	0.124661	0.348051
Aggf1	729.526	0.0487488	0.120975	0.402965	0.686974	0.841873
Agk	100.789	0.120892	0.179006	0.675352	0.499452	0.719796
Agl	662.904	-0.27829	0.165722	-1.67925	0.0931024	0.298937
Agmat	34.4824	0.638435	0.626835	1.01851	0.308438	0.567714
Agmo	65.453	-0.101051	0.320706	-0.315088	0.752695	0.880079
Agpat1	1683.57	0.118414	0.0741251	1.59749	0.110157	0.328004
Agpat2	1070.62	0.243671	0.206188	1.18179	0.237289	0.494513
Agpat3	1123.76	-0.105575	0.064802	-1.62919	0.103272	0.315892
Agpat4	554.993	-0.0346168	0.141235	-0.2451	0.806379	0.908331
Agpat5	718.243	0.141793	0.0738233	1.92071	0.0547684	0.221045
Agpat6	1276.01	0.0272228	0.0527187	0.516379	0.60559	0.792558
Agpat9	597.975	0.133811	0.239603	0.558471	0.576523	0.773007
Agphd1	56.6808	-0.146368	0.239021	-0.612363	0.540298	0.747634
Agps	1192.75	-0.0135301	0.119847	-0.112894	0.910114	0.960216
Agr2	13517.7	0.185803	0.204295	0.909482	0.363096	0.617941
Agrn	2295.67	-0.198257	0.109962	-1.80297	0.0713937	0.2584
Agt	1223.69	0.112097	0.144714	0.774606	0.438572	0.678757
Agtpbp1	353.39	-0.565602	0.187207	-3.02127	0.00251717	0.0459079
Agtr1a	66.8291	-0.478075	0.358259	-1.33444	0.18206	0.427844
Agtr2	45.9879	-0.996817	0.359535	-2.77252	0.00556245	0.067552
Agtrap	398.115	0.0970332	0.111739	0.868388	0.385182	0.63816
Agxt2l2	154.221	0.080983	0.118017	0.686199	0.492587	0.716673
Ahctf1	1576.47	-0.278493	0.226787	-1.228	0.219448	0.472873
Ahcy	826.499	0.191256	0.113447	1.68586	0.0918226	0.296242
Ahcyl1	3191.05	-0.00529102	0.0750087	-0.0705387	0.943765	0.974728
Ahcyl2	4919.67	-0.317665	0.29608	-1.0729	0.283315	0.543902
Ahdc1	1212.26	-0.360744	0.107413	-3.35849	0.000783703	0.0264382
Ahi1	474.498	-0.528596	0.194407	-2.71901	0.00654771	0.072209
Ahnak	11625.3	-0.39891	0.250946	-1.58962	0.111919	0.330006
Ahr	546.645	-0.348796	0.0980239	-3.55827	0.000373301	0.0191868
Ahrr	38.6081	0.78048	0.485556	1.60739	0.107968	0.323745
Ahsa1	1367.18	0.205574	0.0690252	2.97824	0.00289909	0.0493487
Ahsa2	271.157	0.0714842	0.0908067	0.787213	0.431157	0.673231
AI118078	34.4211	0.565987	0.286109	1.97822	0.047904	0.206418
AI314180	1811.27	0.00862472	0.0735679	0.117235	0.906674	0.958593
AI316807	129.588	0.109459	0.163696	0.668674	0.503703	0.723177
AI413582	128.603	0.234512	0.159116	1.47384	0.140524	0.372126
AI414108	473.874	-0.12146	0.2276	-0.533657	0.593579	0.78563
AI462493	210.42	0.174459	0.155758	1.12007	0.262685	0.523606
AI464131	302.927	-0.0792276	0.126359	-0.627004	0.530657	0.741987
AI467606	37.4565	-0.0278544	0.276935	-0.100581	0.919883	0.963927
AI480653	411.128	0.108029	0.165923	0.651081	0.514994	0.730728
AI504432	40.5781	-0.187471	0.261378	-0.717242	0.473225	0.702383
AI507597	32.6257	-0.189827	0.23195	-0.818398	0.41313	0.659967
AI597468	791.445	-0.134679	0.16725	-0.805257	0.420672	0.664272
AI597479	233.816	0.214301	0.18978	1.12921	0.258809	0.52015
AI607873	125.54	-0.291869	0.26646	-1.09536	0.273361	0.534087
AI661453	1259.39	-0.159769	0.353744	-0.451651	0.651521	0.82091
AI662270	28.8228	0.129347	0.228969	0.564912	0.572134	0.770276
AI747448	664.582	1.65934	0.449601	3.69069	0.000223643	0.0153299
AI836003	50.9664	-0.486528	0.262789	-1.8514	0.0641119	0.242335
AI837181	653.668	-0.0060424	0.126645	-0.0477113	0.961946	0.983031
AI846148	699.952	-0.124282	0.101616	-1.22305	0.221311	0.475149
AI987944	83.6376	0.205389	0.142818	1.43811	0.150402	0.387972
Aida	633.514	0.0559084	0.0943682	0.592449	0.55355	0.757933
Aif1	93.8294	0.440359	0.217056	2.02878	0.0424805	0.192782
Aif1l	64.0628	0.14508	0.205172	0.707116	0.479494	0.706452
Aifm1	818.677	0.135991	0.103199	1.31776	0.187584	0.434653
Aifm2	217.473	-0.0489482	0.0944181	-0.518419	0.604166	0.791535
Aig1	447.374	0.074121	0.0636456	1.16459	0.244185	0.502651
Aim1	1036.74	0.211872	0.211584	1.00136	0.316651	0.575956
Aim1l	902.87	-0.1106	0.357793	-0.309117	0.757233	0.883178
Aim2	548.192	-0.00701358	0.243654	-0.028785	0.977036	0.989358
Aimp1	827.977	0.255343	0.0777449	3.28437	0.0010221	0.0304809
Aimp2	391.586	0.19502	0.092354	2.11165	0.0347161	0.173376
Aip	596.87	0.0421724	0.1083	0.389404	0.696977	0.849025
Airn	64.2459	-0.145235	0.171402	-0.847334	0.396809	0.647443
Ajap1	77.1083	-0.578442	0.182894	-3.16272	0.00156304	0.0378054
Ajuba	282.58	-0.0147131	0.133613	-0.110117	0.912316	0.96112
AK010878	64.9601	0.148524	0.135576	1.0955	0.273296	0.534087
Ak1	239.292	-0.327833	0.265044	-1.2369	0.216123	0.469558
AK129341	65.2251	-0.236001	0.161561	-1.46075	0.144084	0.377966
Ak2	3569.65	0.171222	0.1394	1.22827	0.219344	0.472777
Ak3	2495.25	0.0241907	0.0943869	0.256293	0.797724	0.904065
Ak4	669.715	-0.349838	0.179144	-1.95284	0.0508387	0.213108
Ak5	58.5462	-0.465932	0.277631	-1.67824	0.0933007	0.299219
Akap1	1599.28	-0.0908743	0.140472	-0.646919	0.517684	0.732554
Akap10	392.432	0.0225531	0.115421	0.195399	0.845081	0.927443
Akap11	1721.01	-0.273391	0.133668	-2.04531	0.0408248	0.188309
Akap12	2999.32	-0.457522	0.239752	-1.90832	0.0563502	0.224162
Akap13	3924.66	-0.42972	0.293235	-1.46544	0.1428	0.375951
Akap17b	59.4067	-0.253156	0.199363	-1.26983	0.204146	0.45433
Akap2	6532.35	-0.145651	0.2073	-0.702608	0.4823	0.708849
Akap5	254.585	-0.699207	0.461834	-1.51398	0.130031	0.35616
Akap6	375.216	-0.755451	0.259086	-2.91583	0.00354744	0.0549489
Akap7	429.696	0.150859	0.105838	1.42538	0.154048	0.391793
Akap8	1162.3	-0.0364335	0.0808281	-0.450753	0.652168	0.821125
Akap8l	573.314	-0.138043	0.10833	-1.27429	0.20256	0.452882
Akap9	1771.75	-0.249676	0.17382	-1.4364	0.150888	0.388528
Akip1	171.752	0.362953	0.144639	2.50937	0.0120946	0.0980943
Akirin1	1354.82	-0.169949	0.199013	-0.853958	0.393128	0.645655
Akirin2	761.185	-0.012811	0.100065	-0.128027	0.898128	0.954397
Akna	238.434	-0.130468	0.109352	-1.1931	0.232828	0.488896
Akr1a1	8342.93	0.141566	0.0748061	1.89244	0.0584328	0.228824
Akr1b10	109.756	-0.114723	0.225578	-0.508574	0.611051	0.795944
Akr1b7	37.4248	1.32185	0.457096	2.89184	0.00382998	0.0572376
Akr1b8	772.927	0.473495	0.196195	2.41339	0.0158049	0.115052
Akr1c12	829.306	0.270239	0.141872	1.90481	0.0568045	0.225045
Akr1c13	1039.53	0.3621	0.139529	2.59517	0.00945436	0.0874572
Akr1c14	334.307	-0.313057	0.299609	-1.04489	0.296075	0.556155
Akr1c19	635.475	0.292377	0.148096	1.97424	0.0483546	0.207178
Akr1e1	383.282	0.103203	0.0800813	1.28872	0.197494	0.447603
Akr7a5	707.094	0.221589	0.123765	1.79041	0.0733888	0.262263
Akt1	3974.79	-0.00329381	0.0483689	-0.0680977	0.945708	0.975425
Akt1s1	757.777	0.0273094	0.072825	0.375	0.70766	0.856454
Akt2	1111.8	-0.00996135	0.0783104	-0.127203	0.898779	0.95479
Akt3	771.725	-0.40651	0.141448	-2.87391	0.00405419	0.0586554
Aktip	487.51	-0.0497261	0.115212	-0.431606	0.666028	0.829173
Alad	810.687	0.287593	0.117015	2.45775	0.0139809	0.106517
Alas1	2410.58	-0.07801	0.178335	-0.437436	0.661795	0.826684
Alas2	42.1066	0.181574	0.283709	0.639999	0.522173	0.736525
Alcam	927.582	-0.288925	0.0963013	-3.00022	0.00269788	0.0476919
Aldh16a1	953.264	0.303759	0.0967212	3.14057	0.00168621	0.0392455
Aldh18a1	1979.49	0.299813	0.153442	1.95392	0.0507109	0.212967
Aldh1a1	864.928	-0.183112	0.183174	-0.999661	0.317475	0.576759
Aldh1a2	472.021	-0.18979	0.194042	-0.978088	0.328031	0.586822
Aldh1a3	604.857	0.661523	0.275078	2.40486	0.0161788	0.116246
Aldh1a7	287.602	0.254074	0.155036	1.63881	0.101253	0.31291
Aldh1b1	3412.75	0.250636	0.163084	1.53685	0.12433	0.347727
Aldh1l1	734.324	0.442735	0.166483	2.65933	0.00782955	0.0794457
Aldh1l2	123.651	-0.357913	0.149639	-2.39185	0.0167639	0.118659
Aldh2	4864.46	0.0101242	0.128274	0.0789262	0.937091	0.972433
Aldh3a2	1661.31	0.0498736	0.101562	0.491065	0.62338	0.80436
Aldh3b1	58.8115	-0.288938	0.178509	-1.61862	0.10553	0.319643
Aldh3b2	57.0382	0.2055	0.284011	0.723563	0.469334	0.699593
Aldh4a1	415.23	0.0106334	0.109431	0.0971698	0.922592	0.965533
Aldh5a1	283.133	0.168658	0.113301	1.48859	0.136597	0.366777
Aldh6a1	576.356	-0.0170375	0.0778348	-0.218893	0.826734	0.917772
Aldh7a1	498.87	0.00597235	0.0852126	0.0700876	0.944124	0.974874
Aldh9a1	1211.83	0.180029	0.098055	1.836	0.066358	0.246959
Aldoa	19865.9	-0.0219911	0.069306	-0.317305	0.751012	0.878818
Aldob	1841.32	0.108272	0.240797	0.449638	0.652972	0.821832
Aldoc	243.67	-0.184738	0.111486	-1.65704	0.097511	0.306421
Alg1	182.259	0.311334	0.120472	2.58427	0.00975848	0.0890469
Alg10b	511.878	0.0932361	0.134234	0.694578	0.48732	0.712548
Alg11	261.83	0.0591752	0.158835	0.372559	0.709477	0.857537
Alg12	166.842	0.222367	0.150322	1.47927	0.139068	0.370157
Alg13	191.686	-0.197382	0.126903	-1.55538	0.119856	0.340735
Alg14	196.966	0.040685	0.12634	0.322029	0.747431	0.877297
Alg2	613.483	-0.120583	0.165348	-0.72927	0.465837	0.696822
Alg3	191.133	0.260151	0.14888	1.74738	0.0805707	0.275173
Alg5	703.174	0.230262	0.093396	2.46544	0.0136846	0.105026
Alg6	236.763	0.0912261	0.111371	0.819116	0.41272	0.659701
Alg8	178.291	0.303963	0.200954	1.5126	0.130381	0.356729
Alg9	760.349	0.191635	0.0835125	2.29469	0.0217509	0.136892
Alk	34.3017	-1.18699	0.382371	-3.10428	0.0019074	0.0414769
Alkbh1	337.365	0.250598	0.117594	2.13104	0.0330862	0.169074
Alkbh2	78.486	0.0265986	0.120619	0.220518	0.825468	0.917307
Alkbh3	261.937	0.161549	0.0887181	1.82092	0.0686184	0.252189
Alkbh4	134.634	0.14198	0.130967	1.08409	0.278324	0.538797
Alkbh5	3192.94	-0.252003	0.14109	-1.78612	0.0740801	0.263352
Alkbh6	286.653	0.171449	0.128136	1.33803	0.180887	0.425952
Alkbh7	119.272	0.29125	0.131264	2.21881	0.0264996	0.151504
Alkbh8	139.418	0.092986	0.130376	0.713212	0.475715	0.704153
Alms1	114.687	-0.202353	0.168409	-1.20156	0.229536	0.484909
Alox12	34.106	0.260424	0.406651	0.640412	0.521905	0.7363
Alox5ap	60.0505	-0.0304228	0.314215	-0.0968216	0.922868	0.965695
Aloxe3	38.6712	0.255965	0.40346	0.634423	0.525805	0.739237
Alpi	2662.13	0.108525	0.302072	0.359267	0.719395	0.862626
Alpk1	213.662	0.183483	0.163447	1.12259	0.261613	0.522674
Alpl	57.7015	0.100217	0.234311	0.42771	0.668863	0.831117
Als2	207.506	-0.187835	0.144727	-1.29785	0.194338	0.444012
Als2cl	699.781	0.0728064	0.13186	0.552151	0.580845	0.775813
Alyref	798.002	0.271887	0.081122	3.35158	0.000803525	0.0267888
Alyref2	32.7989	0.164943	0.20949	0.787354	0.431074	0.673179
Amacr	143.949	0.146249	0.135403	1.0801	0.280099	0.540723
Ambra1	812.486	-0.0576782	0.168959	-0.341373	0.732823	0.868746
Amdhd2	260.139	0.320209	0.140358	2.28137	0.0225266	0.138623
Amer1	209.02	-0.0315217	0.135186	-0.233173	0.815627	0.913818
Amfr	3578.12	0.0352933	0.081786	0.431532	0.666081	0.829173
Amica1	37.6112	-0.0451319	0.299633	-0.150624	0.880273	0.945422
Amigo1	273.193	-0.0587112	0.266004	-0.220716	0.825314	0.917307
Amigo2	255.102	-0.438785	0.286891	-1.52945	0.126152	0.350843
Amigo3	82.4862	0.166896	0.148893	1.12091	0.262325	0.52331
Ammecr1	143.759	0.00155716	0.153943	0.0101151	0.991929	0.995745
Ammecr1l	1153.61	-0.0910184	0.138914	-0.655213	0.512331	0.729543
Amn	406.553	0.485814	0.5859	0.829175	0.407005	0.655061
Amn1	100.994	0.24458	0.126347	1.93578	0.0528947	0.217033
Amot	529.675	0.00261075	0.160631	0.0162531	0.987032	0.993992
Amotl1	1660.44	-0.0813297	0.132408	-0.614236	0.539059	0.746693
Amotl2	1059.33	-0.166279	0.215447	-0.771788	0.44024	0.679988
Ampd2	881.779	-0.0897926	0.0987769	-0.909044	0.363327	0.618179
Ampd3	658.36	0.114092	0.131849	0.86532	0.386863	0.640086
Amph	137.149	-0.571058	0.207552	-2.75139	0.00593422	0.0695419
Amt	114.414	0.110259	0.157218	0.701314	0.483107	0.709523
Amz1	38.2439	0.141915	0.271142	0.523398	0.600698	0.789385
Amz2	453.393	0.115366	0.109429	1.05425	0.291766	0.552388
Anapc1	1789.18	-0.0665185	0.0623033	-1.06766	0.285675	0.54669
Anapc10	126.603	0.174264	0.131545	1.32474	0.185257	0.431249
Anapc11	639.13	-0.0116777	0.100701	-0.115964	0.907681	0.958971
Anapc13	512.839	0.202532	0.0786443	2.57529	0.0100156	0.0899415
Anapc15	134.164	0.320428	0.148487	2.15795	0.0309315	0.164077
Anapc16	660.587	0.113972	0.0813325	1.40131	0.16112	0.400417
Anapc2	1360.6	0.0180712	0.0490677	0.36829	0.712657	0.859003
Anapc4	621.531	0.132275	0.0913127	1.44859	0.147451	0.382628
Anapc5	3508.55	-0.0169469	0.0925483	-0.183114	0.854708	0.93184
Anapc7	807.559	-0.0817842	0.0661933	-1.23554	0.216631	0.470169
Ang	251.796	0.187786	0.170088	1.10405	0.269572	0.530595
Ang4	2017.91	-0.301676	0.65958	-0.457376	0.647401	0.818388
Angel1	104.813	0.212799	0.143137	1.48669	0.137097	0.367279
Angel2	617.437	-0.0600997	0.081139	-0.740701	0.458875	0.693441
Angpt1	102.144	-0.388331	0.176422	-2.20116	0.0277249	0.155077
Angpt2	271.609	-0.240734	0.152382	-1.57981	0.114151	0.3326
Angptl1	222.641	-0.791872	0.278826	-2.84003	0.00451099	0.0613207
Angptl2	2235.8	-0.467952	0.198562	-2.3567	0.018438	0.125281
Angptl4	837.995	-0.157988	0.18707	-0.844541	0.398367	0.648757
Angptl6	68.5693	-0.0968132	0.272753	-0.354949	0.722628	0.864343
Angptl7	63.8052	-0.00203533	0.758233	-0.00268431	0.997858	0.998963
Ank	1022.3	-0.0958611	0.1016	-0.943511	0.345419	0.601437
Ank1	173.619	-0.564227	0.259405	-2.17508	0.0296238	0.160236
Ank2	655.794	-0.804718	0.221432	-3.63416	0.000278892	0.0170216
Ank3	901.804	-0.368138	0.148491	-2.47919	0.0131681	0.103049
Ankfy1	1659.58	0.037947	0.0969522	0.391399	0.695502	0.848352
Ankhd1	1378.42	-0.276914	0.200437	-1.38155	0.167109	0.409075
Ankib1	1095.04	-0.110237	0.132404	-0.83258	0.405081	0.653552
Ankle1	67.0246	0.177208	0.3863	0.458732	0.646427	0.817614
Ankle2	543.324	0.206198	0.0794481	2.59539	0.0094485	0.0874572
Ankmy2	364.098	0.193248	0.0993413	1.94529	0.0517398	0.214532
Ankra2	209.64	-0.14132	0.163988	-0.86177	0.388814	0.642333
Ankrd10	1254.69	-0.349026	0.116879	-2.98623	0.00282442	0.0489196
Ankrd11	4469.02	-0.440284	0.290151	-1.51743	0.129158	0.354981
Ankrd12	447.434	-0.433405	0.142478	-3.04191	0.00235085	0.0447259
Ankrd13a	2493.04	-0.0524642	0.0934432	-0.561455	0.574487	0.771629
Ankrd13b	515.262	-0.11087	0.105796	-1.04796	0.294658	0.554634
Ankrd13c	842.658	-0.174212	0.144637	-1.20447	0.228407	0.483268
Ankrd13d	56.958	-0.647901	0.248073	-2.61174	0.00900837	0.0852998
Ankrd16	238.627	-0.0502223	0.16824	-0.298516	0.765309	0.887183
Ankrd17	3407.12	-0.306641	0.208016	-1.47412	0.140449	0.372072
Ankrd22	57.2473	-0.180965	0.353495	-0.511932	0.608698	0.794864
Ankrd23	55.0563	-0.262024	0.245529	-1.06718	0.285891	0.546895
Ankrd24	155.858	-0.257067	0.178323	-1.44158	0.149421	0.386348
Ankrd26	118.998	-0.195323	0.172312	-1.13354	0.256988	0.518061
Ankrd27	572.02	0.0636676	0.100331	0.634572	0.525707	0.739237
Ankrd28	1953.82	-0.0829053	0.172358	-0.481007	0.630511	0.808563
Ankrd29	51.8021	-0.369145	0.273126	-1.35155	0.176518	0.420374
Ankrd32	182.142	0.138149	0.0834937	1.6546	0.0980055	0.306779
Ankrd33b	41.9101	-0.0212356	0.24419	-0.0869634	0.930701	0.970083
Ankrd34a	72.2427	-0.459155	0.196318	-2.33883	0.019344	0.128863
Ankrd35	39.7108	-0.466697	0.194416	-2.40051	0.0163721	0.117046
Ankrd37	885.258	-0.313444	0.30791	-1.01797	0.308692	0.567951
Ankrd39	100.805	0.148846	0.191341	0.777909	0.436623	0.677399
Ankrd40	1250.48	-0.0884592	0.0608862	-1.45286	0.146262	0.380938
Ankrd42	32.7483	-0.374086	0.185327	-2.01852	0.0435371	0.195614
Ankrd44	258.884	-0.349219	0.230937	-1.51218	0.130488	0.356902
Ankrd46	556.62	-0.0957568	0.230357	-0.415688	0.677638	0.835822
Ankrd49	115.884	0.300212	0.191583	1.56701	0.117113	0.336746
Ankrd50	1189.34	-0.072012	0.146632	-0.491109	0.62335	0.80436
Ankrd52	1613.98	-0.0731426	0.128692	-0.568356	0.569794	0.768873
Ankrd54	245.617	0.248876	0.118189	2.10575	0.0352262	0.174489
Ankrd6	121.631	-0.11284	0.265921	-0.424334	0.671322	0.83242
Ankrd63	38.7889	0.127551	0.369573	0.34513	0.729996	0.867473
Ankrd9	286.792	-0.0429326	0.189844	-0.226147	0.821087	0.915776
Anks1	772.797	-0.135702	0.0763811	-1.77665	0.0756263	0.266514
Anks1b	40.2094	-1.02572	0.272205	-3.76818	0.000164443	0.0134417
Anks3	336.306	-0.0544069	0.130781	-0.416014	0.677399	0.835791
Anks4b	901.573	-0.100821	0.279852	-0.360265	0.718649	0.862188
Anks6	173.885	0.0788866	0.124853	0.631837	0.527493	0.740039
Ankzf1	201.752	0.116519	0.133562	0.872395	0.382993	0.636009
Anln	731.846	-0.0772397	0.106595	-0.724611	0.468691	0.699194
Ano1	1764.23	-0.352658	0.132476	-2.66205	0.00776659	0.0792368
Ano10	1013.43	-0.0559025	0.0787194	-0.710149	0.477612	0.70523
Ano2	39.7647	-0.386877	0.310793	-1.24481	0.213203	0.466906
Ano6	4180.12	-0.209556	0.127703	-1.64097	0.100803	0.311999
Ano7	441.56	-0.00500996	0.129108	-0.0388044	0.969046	0.98606
Ano8	274.367	-0.0914209	0.153424	-0.595872	0.551261	0.756402
Ano9	915.178	0.0594498	0.171346	0.346957	0.728624	0.866644
Anp32a	1949.11	0.214112	0.0648511	3.30159	0.000961398	0.0297836
Anp32b	1861.44	0.220403	0.0649735	3.3922	0.000693328	0.0254953
Anp32e	1932.12	0.0172298	0.0440983	0.390713	0.696009	0.848732
Anpep	772.511	-0.0625349	0.212367	-0.294466	0.768402	0.889133
Antxr1	2581.42	-0.276645	0.147873	-1.87083	0.0613691	0.235617
Antxr2	1254.63	-0.115915	0.0938658	-1.2349	0.216867	0.470299
Anxa1	3175.12	0.0612006	0.164388	0.372293	0.709675	0.857567
Anxa11	1849.55	0.0823233	0.157692	0.522051	0.601635	0.789829
Anxa13	156.137	0.0786497	0.289732	0.271456	0.78604	0.898769
Anxa2	16027.6	0.188839	0.20226	0.933646	0.350486	0.606678
Anxa3	1117.67	-0.00190045	0.190672	-0.00996712	0.992048	0.99579
Anxa4	4299.27	0.1543	0.148572	1.03856	0.299011	0.558465
Anxa5	3864.24	-0.0950565	0.102415	-0.928152	0.353329	0.609886
Anxa6	4127.78	-0.142016	0.150898	-0.941142	0.346632	0.602799
Anxa7	2421.61	0.129153	0.0921146	1.40209	0.16089	0.400131
Anxa8	508.034	0.00275081	0.393227	0.00699547	0.994418	0.996769
Aoah	42.94	0.0573355	0.240748	0.238156	0.81176	0.91189
Aoc2	95.0009	-0.647514	0.273028	-2.3716	0.0177111	0.122301
Aoc3	1090.17	-0.603456	0.213063	-2.8323	0.00462151	0.0617826
Ap1ar	1365.61	0.169549	0.125513	1.35085	0.176744	0.420816
Ap1b1	1600.83	0.140343	0.0619775	2.26442	0.0235483	0.142095
Ap1g1	2235.18	-0.107641	0.197244	-0.545724	0.585256	0.779154
Ap1g2	534.493	0.185168	0.115016	1.60993	0.107413	0.322738
Ap1m1	517.814	-0.0541997	0.159698	-0.33939	0.734316	0.868999
Ap1m2	1407.37	0.285675	0.137483	2.07789	0.0377192	0.180612
Ap1s1	1610.61	0.283272	0.111389	2.54308	0.010988	0.094249
Ap1s2	134.492	-0.309321	0.172023	-1.79814	0.0721541	0.259559
Ap1s3	283.046	-0.264017	0.331825	-0.79565	0.426236	0.669552
Ap2a1	1482.25	-0.00797484	0.0696579	-0.114486	0.908853	0.959276
Ap2a2	2041.68	0.032756	0.0765429	0.427943	0.668693	0.831058
Ap2b1	3072.73	0.0729845	0.0579946	1.25847	0.208222	0.460457
Ap2m1	1879.64	0.050233	0.0474619	1.05839	0.28988	0.551195
Ap2s1	1487.92	0.209439	0.0781421	2.68024	0.00735698	0.0772056
Ap3b1	1926.99	-0.00425501	0.136817	-0.0311001	0.97519	0.988656
Ap3b2	107.05	-0.868905	0.297976	-2.91602	0.00354522	0.0549489
Ap3d1	2360.01	-0.0580772	0.0682615	-0.850804	0.394878	0.646449
Ap3m1	842.423	0.157932	0.0785892	2.00959	0.0444743	0.19773
Ap3m2	86.8947	-0.526429	0.251943	-2.08947	0.0366653	0.1781
Ap3s1	393.981	-0.00534598	0.0783976	-0.0681906	0.945634	0.975425
Ap3s2	464.049	0.0662402	0.147691	0.448505	0.653789	0.822403
Ap4b1	206.439	0.312494	0.112515	2.77734	0.00548058	0.0673352
Ap4e1	346.536	-0.0655771	0.0918467	-0.713984	0.475237	0.703867
Ap4m1	169.859	0.0105713	0.126125	0.0838161	0.933203	0.970864
Ap4s1	296.705	-0.00909219	0.0878516	-0.103495	0.91757	0.963214
Ap5b1	76.6263	0.148772	0.17825	0.834628	0.403927	0.652798
Ap5m1	325.302	-0.0324167	0.123069	-0.263402	0.792241	0.901687
Ap5s1	166.741	0.0602896	0.146185	0.41242	0.680031	0.837527
Ap5z1	167.295	-0.0289963	0.191452	-0.151455	0.879617	0.945159
Apaf1	955.03	-0.177948	0.217321	-0.818823	0.412887	0.659807
Apba1	300.617	-0.665363	0.192898	-3.4493	0.000562032	0.023241
Apba2	94.4938	-0.72202	0.264261	-2.73222	0.00629085	0.0710154
Apba3	611.676	0.0420932	0.0984698	0.427473	0.669035	0.831158
Apbb1	337.111	-0.503024	0.259137	-1.94115	0.0522398	0.21565
Apbb1ip	111.67	0.177422	0.14033	1.26432	0.206116	0.457215
Apbb2	464.943	-0.227962	0.118234	-1.92807	0.0538469	0.219197
Apbb3	171.208	-0.0486903	0.184112	-0.264461	0.791425	0.901185
Apc	2329.99	-0.430555	0.245629	-1.75287	0.0796243	0.273268
Apc2	134.844	-0.825927	0.304908	-2.70877	0.00675327	0.0734546
Apcdd1	138.388	-0.0130267	0.142189	-0.0916157	0.927003	0.968248
Apeh	797.179	0.157688	0.102254	1.54212	0.123045	0.3456
Apex1	136.881	0.446775	0.133112	3.35637	0.000789721	0.0264586
Apex2	146.74	0.163213	0.0999611	1.63277	0.102518	0.314718
Aph1a	809.168	0.0764045	0.0850794	0.898038	0.369166	0.623268
Aph1b	165.451	-0.161193	0.126562	-1.27363	0.202796	0.45311
Aph1c	24.3651	-0.283301	0.252304	-1.12286	0.261498	0.522572
Api5	2191.76	0.0828955	0.058691	1.41241	0.15783	0.396267
Apip	124.003	-0.0518612	0.173637	-0.298676	0.765187	0.887183
Apitd1	35.232	0.14632	0.283852	0.515478	0.606219	0.793009
Aplf	120.609	0.176633	0.121092	1.45866	0.144658	0.378347
Apln	96.1046	-0.302877	0.386072	-0.784509	0.432741	0.674596
Aplnr	265.624	0.117299	0.25103	0.467272	0.640305	0.814096
Aplp1	753.004	-0.356768	0.167376	-2.13154	0.0330447	0.16901
Aplp2	6458.88	-0.218774	0.0883644	-2.47582	0.013293	0.103366
Apmap	569.545	0.100944	0.072652	1.38942	0.164706	0.405903
Apoa1	33.5869	-0.221377	0.740022	-0.299149	0.764827	0.88707
Apoa1bp	594.224	0.179808	0.0899947	1.99798	0.0457183	0.201282
Apob	726.748	-0.300379	0.418556	-0.717655	0.47297	0.702316
Apobec1	320.519	-0.563396	0.422015	-1.33501	0.181872	0.427698
Apobec2	25.7759	0.0331548	0.192535	0.172201	0.863279	0.936241
Apobec3	311.812	0.485954	0.244817	1.98497	0.0471481	0.204721
Apobr	61.4125	-0.0726731	0.204787	-0.354871	0.722686	0.864343
Apoc2	28.4667	0.105289	0.490805	0.214523	0.830139	0.919073
Apoe	4677.64	-0.0544528	0.14408	-0.377934	0.70548	0.854701
Apol10a	1352.63	0.0473434	0.201053	0.235477	0.813839	0.912945
Apol10b	27.282	0.689402	0.517655	1.33178	0.182933	0.428683
Apol6	222.669	0.111645	0.25686	0.434652	0.663815	0.827718
Apol7a	273.716	-0.505292	0.301423	-1.67636	0.0936683	0.299902
Apol8	35.8822	-2.29415	1.16932	-1.96196	0.0497675	0.210964
Apol9a	52.0525	0.0338078	0.302841	0.111636	0.911112	0.960746
Apol9b	28.5724	0.206679	0.290823	0.71067	0.477289	0.705099
Apold1	1031.71	-0.254914	0.232072	-1.09843	0.272018	0.532999
Apoo	42.0143	0.00898504	0.174659	0.0514432	0.958972	0.981986
Apool	360.01	0.254276	0.095847	2.65294	0.00797952	0.0805012
Apopt1	332.586	0.130219	0.119998	1.08518	0.277841	0.53867
App	16188.3	-0.133174	0.0962734	-1.38329	0.166575	0.408431
Appbp2	680.332	-0.156172	0.203045	-0.769152	0.441803	0.680921
Appl1	2013.41	0.0445979	0.153199	0.291112	0.770966	0.890924
Appl2	1649.63	-0.173415	0.159444	-1.08762	0.276761	0.537891
Aprt	1559.74	0.278416	0.10758	2.58798	0.00965393	0.0883335
Aptx	167.246	0.0918935	0.129941	0.707193	0.479447	0.706452
Aqp1	2352.43	-0.0426694	0.0835398	-0.510767	0.609514	0.79524
Aqp11	101.142	0.170069	0.150988	1.12638	0.260005	0.521237
Aqp3	43.311	0.399122	0.22173	1.80004	0.0718546	0.259033
Aqp4	2455.13	0.134591	0.416969	0.322785	0.746858	0.876882
Aqp8	8720.77	-0.0704422	0.344479	-0.204489	0.837971	0.923374
Aqr	821.814	0.12453	0.10007	1.24443	0.213342	0.466968
Araf	1150.14	0.0441886	0.0703978	0.627699	0.530201	0.741986
Arap1	1465.06	0.0811585	0.0991351	0.818665	0.412977	0.659807
Arap2	808.072	-0.083043	0.280516	-0.296037	0.767202	0.888542
Arap3	351.109	-0.0897749	0.143752	-0.624513	0.532291	0.7433
Arc	1761.05	0.0942855	0.498845	0.189008	0.850087	0.929412
Arcn1	4683.93	-0.0392419	0.0800977	-0.489925	0.624187	0.804788
Areg	2068.43	0.315118	0.352765	0.893283	0.371706	0.625844
Arf1	7548.56	0.0367513	0.0747926	0.491376	0.62316	0.804305
Arf2	976.644	-0.124368	0.0938576	-1.32507	0.185148	0.431109
Arf3	3283.19	-0.0101042	0.0743738	-0.135857	0.891935	0.95105
Arf4	7467.26	-0.0203649	0.0869644	-0.234175	0.814849	0.913337
Arf5	1848.56	0.234069	0.0737721	3.17286	0.00150943	0.0369702
Arf6	5529.78	0.101475	0.120178	0.844369	0.398463	0.648835
Arfgap1	922.001	0.0657523	0.0737185	0.891937	0.372427	0.626514
Arfgap2	925.909	0.128907	0.097968	1.31581	0.188239	0.435576
Arfgap3	1830.64	0.0276248	0.0504573	0.547489	0.584043	0.778551
Arfgef1	3469.66	-0.148707	0.207267	-0.717464	0.473088	0.702316
Arfgef2	1228.19	-0.11674	0.141745	-0.823589	0.410173	0.657667
Arfip1	1670.81	0.0869549	0.103496	0.840175	0.40081	0.650895
Arfip2	1163.25	-0.012309	0.0632637	-0.194566	0.845732	0.927708
Arfrp1	377.252	0.212305	0.126615	1.67678	0.0935864	0.299852
Arg1	54.4447	1.14223	0.349559	3.26764	0.00108448	0.0311765
Arg2	345.453	-0.070204	0.238064	-0.294896	0.768074	0.889026
Arglu1	763.035	0.105034	0.156681	0.670371	0.502621	0.721992
Arhgap1	1809.25	0.108771	0.0704051	1.54493	0.122364	0.344687
Arhgap10	649.702	0.0881329	0.156056	0.564751	0.572243	0.770276
Arhgap11a	550.957	0.105057	0.167558	0.626993	0.530664	0.741987
Arhgap12	815.801	-0.0721498	0.1506	-0.479084	0.631879	0.809552
Arhgap15	36.281	-0.362658	0.229108	-1.58291	0.113442	0.33179
Arhgap17	890.09	-0.151237	0.200105	-0.75579	0.449775	0.68681
Arhgap18	741.598	-0.00741342	0.165613	-0.0447635	0.964296	0.983959
Arhgap19	237.211	0.323949	0.128905	2.51308	0.0119682	0.0977704
Arhgap20	191.371	-0.223156	0.176156	-1.26681	0.205223	0.455809
Arhgap21	2327.46	-0.396088	0.294706	-1.34401	0.178945	0.423638
Arhgap22	91.8092	-0.358852	0.256666	-1.39813	0.162074	0.401756
Arhgap23	1205.28	-0.455714	0.166474	-2.73745	0.00619175	0.0707581
Arhgap24	466.279	-0.141856	0.113804	-1.2465	0.21258	0.466295
Arhgap25	44.3187	-0.179055	0.21787	-0.821845	0.411165	0.658301
Arhgap26	454.212	-0.347324	0.15	-2.31549	0.020586	0.132957
Arhgap27	2575.49	-0.215686	0.279201	-0.77251	0.439812	0.679741
Arhgap28	299.712	-0.241345	0.141395	-1.70689	0.0878429	0.28885
Arhgap29	1613.52	-0.0964157	0.11504	-0.838104	0.401972	0.651189
Arhgap30	90.1973	-0.072627	0.226651	-0.320436	0.748638	0.87814
Arhgap31	744.296	-0.404436	0.127355	-3.17565	0.00149502	0.0369506
Arhgap32	1604.84	-0.12021	0.256757	-0.468187	0.639651	0.813961
Arhgap33	154.885	-0.101518	0.173109	-0.586438	0.557582	0.760996
Arhgap39	600.463	-0.246539	0.114661	-2.15016	0.0315424	0.165548
Arhgap4	57.6202	0.203592	0.170444	1.19448	0.23229	0.488298
Arhgap42	759.435	-0.256389	0.174882	-1.46607	0.142629	0.37572
Arhgap44	204.842	-0.391994	0.161937	-2.42066	0.0154926	0.113635
Arhgap5	1644.84	-0.305505	0.236501	-1.29177	0.196438	0.446476
Arhgap6	338.08	-0.521908	0.23539	-2.21721	0.0266088	0.151831
Arhgap8	135.905	0.253983	0.164939	1.53986	0.123595	0.346518
Arhgap9	152.139	0.432811	0.175994	2.45924	0.0139233	0.106289
Arhgdia	8626.94	0.149456	0.0551656	2.70923	0.00674399	0.0734546
Arhgdib	169.249	0.115427	0.188461	0.61247	0.540227	0.747612
Arhgdig	119.676	0.0380606	0.160387	0.237305	0.81242	0.912111
Arhgef1	1757.86	0.00577934	0.0651745	0.0886749	0.92934	0.969271
Arhgef10	323.258	-0.357642	0.161407	-2.21578	0.0267065	0.152205
Arhgef10l	1056.16	-0.171418	0.153714	-1.11517	0.264777	0.525258
Arhgef11	1112.9	-0.323263	0.151046	-2.14016	0.0323418	0.167179
Arhgef12	3000.81	-0.462987	0.161255	-2.87116	0.00408971	0.0588476
Arhgef15	186.925	0.129914	0.215552	0.602705	0.546705	0.753027
Arhgef16	1634.02	0.12803	0.183818	0.696504	0.486113	0.711473
Arhgef17	2830.58	-0.211752	0.163613	-1.29423	0.195586	0.445257
Arhgef18	653.377	-0.118912	0.076607	-1.55223	0.120606	0.341679
Arhgef19	324.172	-0.067784	0.125509	-0.540073	0.589146	0.782128
Arhgef2	1567.41	-0.160014	0.106142	-1.50755	0.13167	0.358665
Arhgef25	551.62	-0.212936	0.219247	-0.971213	0.331442	0.589294
Arhgef26	540.863	-0.242183	0.228694	-1.05898	0.289607	0.550847
Arhgef28	848.22	-0.189745	0.129811	-1.4617	0.143823	0.377609
Arhgef3	913.118	-0.308607	0.138632	-2.2261	0.0260076	0.149722
Arhgef37	108.912	-0.837708	0.474308	-1.76617	0.0773677	0.269721
Arhgef38	39.7766	-0.45939	0.374582	-1.22641	0.220046	0.473485
Arhgef39	230.178	-0.0897126	0.169966	-0.527826	0.59762	0.787292
Arhgef4	57.3259	-0.478628	0.287539	-1.66457	0.0959993	0.304065
Arhgef40	1155.91	-0.148942	0.0988742	-1.50638	0.13197	0.359074
Arhgef5	2490.9	-0.0799271	0.272006	-0.293843	0.768878	0.889269
Arhgef6	207.022	-0.445945	0.159887	-2.78912	0.00528509	0.0664799
Arhgef7	1322.43	-0.107089	0.0891543	-1.20116	0.229687	0.485153
Arhgef9	265.257	-0.501581	0.190072	-2.63889	0.00831772	0.0820823
Arid1a	2434.23	-0.335611	0.194172	-1.72842	0.0839129	0.282045
Arid1b	1723.24	-0.336622	0.188262	-1.78805	0.0737674	0.262854
Arid2	1074.49	-0.366311	0.180229	-2.03248	0.0421051	0.192099
Arid3a	534.528	-0.103085	0.246581	-0.418057	0.675905	0.834823
Arid3b	171.982	-0.0102238	0.181886	-0.0562098	0.955175	0.980529
Arid4a	883.645	-0.30639	0.235642	-1.30024	0.19352	0.443006
Arid4b	1031.03	-0.443101	0.26814	-1.6525	0.0984327	0.307666
Arid5a	608.161	-0.197267	0.196783	-1.00246	0.316122	0.575478
Arid5b	855.151	-0.452893	0.326256	-1.38815	0.165091	0.406259
Arih1	2501.38	-0.197607	0.16079	-1.22897	0.219082	0.47264
Arih2	1432.13	-0.127895	0.19441	-0.657866	0.510624	0.728311
Arl1	1470.91	0.0773328	0.11309	0.683817	0.494091	0.717194
Arl10	144.871	0.102574	0.12127	0.845832	0.397646	0.648361
Arl13b	404.945	-0.278946	0.168556	-1.65492	0.0979415	0.306743
Arl14	212.229	-0.144852	0.269943	-0.536602	0.591542	0.784234
Arl14ep	361.421	0.289679	0.211654	1.36864	0.171111	0.413203
Arl15	283.058	-0.136048	0.0937939	-1.4505	0.14692	0.381397
Arl16	145.828	0.0604961	0.13787	0.438791	0.660813	0.82626
Arl2	314.745	0.0422688	0.174677	0.241983	0.808794	0.910069
Arl2bp	1386.99	-0.00793399	0.0836215	-0.0948799	0.92441	0.966471
Arl3	263.582	-0.164378	0.170583	-0.963622	0.335235	0.592143
Arl4a	2025.04	0.100968	0.151486	0.666518	0.50508	0.724617
Arl4c	865.802	0.273338	0.176472	1.54891	0.121404	0.342981
Arl4d	502.135	-0.395324	0.53283	-0.741933	0.458128	0.69328
Arl5a	1116.21	-0.16924	0.0869251	-1.94697	0.0515385	0.214355
Arl5b	663.341	-0.541952	0.291437	-1.85958	0.0629443	0.239308
Arl5c	63.0705	-0.0747548	0.245861	-0.304054	0.761087	0.885087
Arl6	83.8639	-0.158027	0.224345	-0.704392	0.481188	0.707701
Arl6ip1	2900.24	0.218283	0.100449	2.17306	0.0297755	0.160652
Arl6ip4	441.912	0.209428	0.122506	1.70953	0.0873529	0.288603
Arl6ip5	1817.38	-0.14729	0.121765	-1.20963	0.226422	0.480981
Arl6ip6	358.037	-0.0830207	0.0817512	-1.01553	0.309854	0.568933
Arl8a	1297.92	-0.163239	0.0678286	-2.40664	0.0161001	0.11608
Arl8b	1887	0.00362785	0.0438925	0.0826531	0.934127	0.971232
Armc1	576.394	0.128646	0.076531	1.68097	0.0927686	0.298218
Armc10	600.613	0.386442	0.104742	3.68946	0.000224733	0.0153299
Armc5	366.256	0.14195	0.0864866	1.6413	0.100736	0.311861
Armc6	121.647	0.220642	0.20609	1.07061	0.284345	0.54541
Armc7	87.5181	-0.0694496	0.195095	-0.355979	0.721856	0.863897
Armc8	648.533	0.0312535	0.065724	0.475526	0.634412	0.810273
Armc9	98.7648	-0.294288	0.204949	-1.43591	0.151029	0.388642
Armcx1	268.658	-0.109203	0.183232	-0.59598	0.551189	0.756379
Armcx2	919.573	-0.146808	0.111759	-1.31362	0.188975	0.436609
Armcx3	282.247	-0.0949815	0.12314	-0.771329	0.440512	0.679988
Armcx4	888.123	-0.451386	0.165187	-2.73258	0.00628396	0.0710154
Armcx5	108.179	-0.03342	0.153197	-0.21815	0.827312	0.917999
Armcx6	73.2262	-0.0865016	0.14749	-0.586493	0.557544	0.760996
Arnt	1223.5	-0.0443425	0.0828244	-0.535379	0.592388	0.784665
Arnt2	107.388	-0.329079	0.194505	-1.69188	0.0906698	0.294087
Arntl	417.601	-0.337863	0.278268	-1.21416	0.224685	0.479306
Arpc1a	1316.22	0.118135	0.0750279	1.57455	0.115361	0.335007
Arpc1b	5471.36	0.251158	0.122399	2.05195	0.0401741	0.18701
Arpc2	7489.28	0.037603	0.111627	0.336865	0.736219	0.870284
Arpc3	2684.95	0.128319	0.0760002	1.68841	0.0913325	0.295376
Arpc4	1752.27	0.292494	0.091834	3.18503	0.00144739	0.0362356
Arpc5	4616.73	0.166755	0.0982174	1.69782	0.0895425	0.292111
Arpc5l	770.571	0.104215	0.0984193	1.05889	0.289649	0.550847
Arpp19	1487.83	0.149505	0.0652494	2.29128	0.0219473	0.137391
Arpp21	30.1376	-0.603433	0.304786	-1.97986	0.0477193	0.20608
Arrb1	1774	-0.212975	0.134477	-1.58373	0.113256	0.331674
Arrb2	212.829	-0.0951614	0.145859	-0.65242	0.51413	0.730113
Arrdc1	897.829	0.158035	0.126311	1.25116	0.210875	0.463679
Arrdc2	112.368	0.0129088	0.271096	0.0476172	0.962021	0.983031
Arrdc3	1933.32	0.0828456	0.288474	0.287186	0.77397	0.892268
Arrdc4	1753.94	0.119018	0.273026	0.435923	0.662893	0.827542
Arsa	358.009	-0.106068	0.115032	-0.922073	0.35649	0.611919
Arsb	881.822	-0.0170978	0.0724116	-0.23612	0.81334	0.91246
Arsg	118.952	-0.0702515	0.138124	-0.508613	0.611024	0.795944
Arsi	262.273	0.0231633	0.179102	0.12933	0.897097	0.954198
Arsj	116.094	0.143582	0.156198	0.91923	0.357975	0.613381
Arsk	150.482	-0.174856	0.100488	-1.74007	0.0818463	0.277921
Art2a-ps	40.2459	0.763559	0.476581	1.60216	0.10912	0.326411
Art3	346.022	-0.345845	0.259962	-1.33037	0.183397	0.429203
Artn	81.9385	-0.44174	0.253239	-1.74436	0.0810961	0.276273
Arv1	58.8199	0.462358	0.201641	2.29297	0.0218497	0.137195
Arvcf	350.914	-0.394981	0.251933	-1.5678	0.116928	0.336606
Arxes1	25.878	-0.363337	0.240498	-1.51077	0.130847	0.357597
Arxes2	50.7325	-0.564724	0.229108	-2.46488	0.0137058	0.10507
As3mt	397.117	-0.039715	0.11865	-0.334724	0.737833	0.871489
Asah1	2161	-0.0200804	0.120932	-0.166047	0.86812	0.939072
Asah2	331.012	-0.0813451	0.114379	-0.711187	0.476969	0.704933
Asap1	879.937	-0.351187	0.242011	-1.45112	0.146747	0.381239
Asap2	683.671	-0.155546	0.192862	-0.806516	0.419946	0.663821
Asap3	319.065	-0.397742	0.204959	-1.94059	0.0523082	0.215736
Asb1	231.533	-0.282779	0.136804	-2.06703	0.0387311	0.183217
Asb11	65.421	-0.268284	0.379416	-0.707097	0.479506	0.706452
Asb13	207.9	-0.0659032	0.115315	-0.571507	0.567656	0.767671
Asb2	391.783	-0.414746	0.272708	-1.52084	0.1283	0.353769
Asb3	123.51	0.244868	0.167337	1.46332	0.14338	0.376738
Asb4	50.9133	0.253081	0.253241	0.999367	0.317617	0.576864
Asb5	86.5709	-0.304636	0.43385	-0.702168	0.482575	0.709048
Asb6	394.037	0.0332368	0.145856	0.227874	0.819745	0.915164
Asb7	426.893	-0.0838209	0.154034	-0.544171	0.586324	0.779922
Asb8	358.19	0.121261	0.146372	0.828446	0.407418	0.655317
Ascc1	405.886	0.218635	0.0855461	2.55576	0.0105956	0.0925768
Ascc2	691.585	0.11567	0.0869152	1.33083	0.183244	0.428919
Ascc3	1031.35	-0.171745	0.198697	-0.864358	0.387391	0.640725
Ascl2	60.2199	-0.104892	0.321634	-0.326123	0.744331	0.875581
Asf1a	309.505	0.161815	0.0724092	2.23474	0.0254347	0.147994
Asf1b	146.037	0.299845	0.181476	1.65226	0.0984824	0.307692
Ash1l	1757.39	-0.520017	0.229164	-2.26919	0.0232565	0.141194
Ash2l	846.08	0.210291	0.0624018	3.36995	0.00075181	0.0261322
Asic1	62.7351	-0.625553	0.270935	-2.30887	0.0209508	0.133906
Asic2	109.189	-0.651831	0.288512	-2.25929	0.0238655	0.143351
Asic4	57.9616	-0.881614	0.359777	-2.45045	0.0142679	0.107992
Asl	558.799	0.0702395	0.0841192	0.834999	0.403718	0.652693
Asna1	694.397	0.139551	0.0656183	2.12671	0.0334441	0.170411
Asns	1354.58	0.391118	0.22868	1.71033	0.0872051	0.288325
Asnsd1	605.844	0.255907	0.0927801	2.75821	0.00581185	0.0687542
Aspa	45.9738	-0.324858	0.221391	-1.46735	0.142282	0.375023
Aspg	584.366	0.15565	0.16092	0.967252	0.333418	0.590856
Asph	1589.13	-0.140906	0.0834985	-1.68753	0.0915024	0.295618
Asphd2	41.8545	-0.782145	0.277618	-2.81735	0.00484225	0.0632991
Aspm	192.451	0.242554	0.188328	1.28793	0.197769	0.447926
Aspn	4421.13	-0.354448	0.146107	-2.42594	0.0152688	0.112702
Aspscr1	660.725	0.138386	0.106015	1.30534	0.191777	0.440233
Asrgl1	185.698	-0.226292	0.114889	-1.96967	0.0488764	0.208548
Aste1	156.529	0.262479	0.120063	2.18618	0.0288023	0.157423
Astn1	208.262	-0.832668	0.278616	-2.98858	0.00280274	0.0486369
Astn2	176.058	-0.203853	0.1916	-1.06395	0.28735	0.548567
Asun	472.151	-0.0692266	0.140099	-0.494127	0.621216	0.802836
Asxl1	1344.68	-0.291508	0.199778	-1.45916	0.144522	0.37812
Asxl2	911.272	-0.273457	0.17381	-1.57331	0.115648	0.335142
Asxl3	106.436	-0.397666	0.202606	-1.96276	0.0496744	0.210767
Atad1	1723.09	0.121553	0.0660278	1.84094	0.0656305	0.245463
Atad2	450.653	0.00310575	0.126168	0.024616	0.980361	0.991351
Atad2b	700.501	-0.314321	0.169697	-1.85224	0.0639908	0.241999
Atad3a	1213.75	0.279836	0.0886402	3.15699	0.00159407	0.0382155
Atad5	141.782	-0.102134	0.151706	-0.673232	0.5008	0.720839
Atat1	136.832	-0.253541	0.211896	-1.19653	0.231489	0.486987
Atcay	103.156	-0.657666	0.31084	-2.11577	0.0343643	0.17302
Ate1	1108.79	-0.338841	0.109855	-3.08445	0.00203931	0.0428002
Atf1	636.263	0.0191733	0.0773677	0.24782	0.804274	0.907579
Atf2	898.705	-0.155233	0.0875329	-1.77342	0.0761586	0.267165
Atf3	6589.62	-0.0764942	0.227612	-0.336072	0.736816	0.87059
Atf4	10475.6	-0.0607732	0.146341	-0.415284	0.677934	0.836024
Atf5	1187.84	0.116663	0.144984	0.804659	0.421017	0.664614
Atf6	1726.34	-0.0824607	0.167653	-0.491853	0.622823	0.804146
Atf6b	854.448	0.158907	0.10129	1.56884	0.116686	0.336374
Atf7	153.608	-0.221386	0.154721	-1.43087	0.152467	0.390197
Atf7ip	453.425	-0.152838	0.158372	-0.965055	0.334517	0.591795
Atg10	131.146	0.0509667	0.115191	0.442453	0.658161	0.824692
Atg12	946.129	-0.00405223	0.0785563	-0.0515837	0.95886	0.981945
Atg13	527.931	-0.0224794	0.108082	-0.207984	0.835241	0.922013
Atg14	143.589	0.0217821	0.165017	0.131999	0.894985	0.952774
Atg16l1	558.92	0.0877116	0.086038	1.01945	0.307989	0.567403
Atg16l2	150.264	-0.228087	0.198289	-1.15028	0.25003	0.510557
Atg2a	645.575	-0.281881	0.126411	-2.22987	0.025756	0.149034
Atg2b	1020.23	-0.323395	0.150123	-2.15421	0.0312238	0.164866
Atg3	720.35	0.0705967	0.0514488	1.37217	0.170009	0.411939
Atg4a	36.2129	-0.0580061	0.159239	-0.364271	0.715655	0.86038
Atg4b	785.331	0.0633611	0.0505845	1.25258	0.21036	0.463071
Atg4c	240.316	0.0697592	0.0930988	0.749303	0.453675	0.689981
Atg4d	583.59	0.153332	0.116076	1.32096	0.186515	0.43336
Atg5	600.388	0.162832	0.0706295	2.30544	0.021142	0.13481
Atg7	602.499	0.0710289	0.0741755	0.95758	0.338275	0.59443
Atg9a	1147.26	-0.150753	0.0630646	-2.39045	0.0168276	0.118913
Athl1	425.135	0.0135744	0.130803	0.103777	0.917346	0.963054
Atic	1127.06	0.362953	0.119449	3.03856	0.00237713	0.0447259
Atl1	93.0482	-0.650582	0.24071	-2.70276	0.00687668	0.0742332
Atl2	1975.78	-0.185471	0.221856	-0.835995	0.403158	0.652253
Atl3	1598.9	-0.0348475	0.0653989	-0.532845	0.594141	0.78599
Atm	327.906	-0.197006	0.131971	-1.4928	0.135489	0.365416
Atmin	449.432	-0.0920394	0.0980974	-0.938245	0.348119	0.60443
Atn1	2670.67	-0.237702	0.114123	-2.08287	0.0372631	0.179728
Atoh1	398.063	-0.105364	0.197254	-0.534157	0.593233	0.785325
Atoh8	93.8779	-0.102484	0.275776	-0.371621	0.710175	0.857786
Atox1	593.914	0.153919	0.0993485	1.54928	0.121314	0.342868
Atp10a	712.91	-0.117726	0.173262	-0.67947	0.49684	0.718723
Atp10b	2130.89	-0.0524716	0.350585	-0.149669	0.881026	0.94553
Atp10d	150.096	-0.683966	0.25594	-2.67237	0.00753169	0.0781419
Atp11a	2711.27	-0.381498	0.173215	-2.20246	0.0276327	0.155077
Atp11b	3024.9	-0.212225	0.274354	-0.773543	0.439201	0.679535
Atp11c	444.474	-0.290853	0.129542	-2.24525	0.0247522	0.146074
Atp12a	80.5729	-0.548145	0.531786	-1.03076	0.302652	0.562175
Atp13a1	1193.11	0.134306	0.0818808	1.64027	0.10095	0.312309
Atp13a2	509.752	-0.267056	0.128962	-2.07082	0.038376	0.182008
Atp13a3	4236.67	-0.196637	0.199293	-0.986671	0.323804	0.582644
Atp1a1	24634.5	0.137548	0.158218	0.869362	0.384649	0.637823
Atp1a2	694.313	-0.680791	0.296255	-2.29799	0.0215624	0.136021
Atp1a3	105.27	-1.00026	0.350901	-2.85054	0.00436449	0.0606781
Atp1b1	11483.9	-0.00774641	0.148952	-0.052006	0.958524	0.981945
Atp1b2	374.839	-0.299557	0.2091	-1.4326	0.151972	0.389372
Atp1b3	1339.92	-0.150435	0.0660614	-2.27719	0.0227746	0.13958
Atp2a2	10404	-0.285805	0.0786133	-3.63558	0.000277357	0.0170216
Atp2a3	8012.26	-0.0464137	0.143311	-0.323866	0.746039	0.876375
Atp2b1	4538.9	-0.0844126	0.197831	-0.426691	0.669604	0.831582
Atp2b2	59.0986	-1.28803	0.380316	-3.38673	0.000707319	0.0257686
Atp2b3	52.4579	-1.1814	0.35868	-3.29375	0.000988594	0.0299263
Atp2b4	4609.88	-0.58375	0.219311	-2.66174	0.0077737	0.0792497
Atp2c1	1304.26	-0.0484071	0.108994	-0.444127	0.656951	0.824034
Atp2c2	539.187	0.0370893	0.21854	0.169714	0.865235	0.937205
Atp5a1	20326.7	0.122625	0.0964052	1.27197	0.203383	0.453638
Atp5b	29196.2	0.15355	0.0854599	1.79675	0.072376	0.259945
Atp5c1	5946.48	0.149154	0.0685122	2.17704	0.0294777	0.159865
Atp5d	5883.35	0.184299	0.0685211	2.68966	0.00715241	0.0760588
Atp5e	1843.7	0.255458	0.0916172	2.78832	0.00529824	0.0664799
Atp5f1	4281.11	0.212029	0.0909942	2.33014	0.0197988	0.130286
Atp5g1	1621	0.236704	0.0946054	2.50201	0.012349	0.0991504
Atp5g2	394.833	0.179539	0.0907217	1.97901	0.0478154	0.206167
Atp5g3	6389.5	0.160345	0.0858811	1.86706	0.0618937	0.236707
Atp5h	2846.77	0.161786	0.0738533	2.19064	0.0284781	0.156762
Atp5j	2271.6	0.0642775	0.0698843	0.91977	0.357693	0.61313
Atp5j2	2592.45	0.19824	0.0855728	2.31663	0.0205239	0.132942
Atp5k	1011.89	0.177591	0.0902351	1.9681	0.049057	0.209128
Atp5o	3642.49	0.169378	0.0835322	2.02769	0.0425916	0.193221
Atp5s	124.478	0.177881	0.114918	1.54789	0.121648	0.34324
Atp5sl	335.517	0.17009	0.0976841	1.74122	0.0816447	0.277584
Atp6ap1	2607.2	-0.0124919	0.0729032	-0.171349	0.863949	0.936537
Atp6ap2	2679.35	0.00609041	0.117622	0.0517797	0.958704	0.981945
Atp6v0a1	1537.98	-0.158702	0.0649269	-2.44433	0.0145123	0.109035
Atp6v0a2	786.958	-0.0490804	0.158515	-0.309627	0.756845	0.883105
Atp6v0b	1319.95	0.013614	0.0775611	0.175525	0.860667	0.93542
Atp6v0d1	1799.36	-0.0601476	0.0941562	-0.638807	0.522949	0.737048
Atp6v0e	903.597	0.0826408	0.0801966	1.03048	0.302786	0.562269
Atp6v0e2	410.742	-0.534452	0.23206	-2.30307	0.0212747	0.135148
Atp6v1a	2099.59	-0.185391	0.0884234	-2.09663	0.0360261	0.176604
Atp6v1b2	1914.02	-0.0936543	0.0940765	-0.995513	0.319487	0.578633
Atp6v1c1	678.898	-0.0984172	0.0696112	-1.41381	0.157417	0.395994
Atp6v1d	878.886	-0.0707799	0.0704844	-1.00419	0.315286	0.57463
Atp6v1e1	1545.83	0.0689912	0.087394	0.789426	0.429863	0.67237
Atp6v1f	923.482	0.165619	0.0935922	1.76959	0.076796	0.268776
Atp6v1g1	1098.8	0.166259	0.0796747	2.08672	0.0369137	0.178887
Atp6v1g2	65.1665	-0.647931	0.260111	-2.49097	0.0127393	0.100949
Atp6v1h	1161.01	0.0504705	0.0800221	0.630706	0.528232	0.7403
Atp7a	932.08	0.00886246	0.218257	0.0406056	0.96761	0.985699
Atp8a1	1211.72	-0.206915	0.155239	-1.33288	0.182572	0.428412
Atp8a2	240.06	0.0834828	0.12393	0.673631	0.500546	0.720627
Atp8b1	5307.53	-0.151066	0.243309	-0.620881	0.534678	0.744765
Atp8b2	1618.46	-0.404033	0.144082	-2.80419	0.00504435	0.0650312
Atp9a	2830.8	-0.0531557	0.0805837	-0.659634	0.509489	0.727693
Atp9b	885.611	-0.0931262	0.0557887	-1.66927	0.0950648	0.302163
Atpaf1	70.1148	0.134208	0.157502	0.8521	0.394159	0.646322
Atpaf2	376.964	0.112037	0.0830035	1.34978	0.177087	0.421263
Atpbd4	212.592	0.000350639	0.0980441	0.00357634	0.997146	0.998471
Atpif1	2981.57	0.23079	0.0934193	2.47048	0.0134932	0.104147
Atr	348.011	0.0268956	0.103386	0.260147	0.794751	0.90274
Atraid	708.894	-0.0245054	0.0992809	-0.246829	0.805041	0.907579
Atrip	209.427	-0.0238496	0.104693	-0.227806	0.819797	0.915164
Atrn	1238.85	-0.13599	0.137106	-0.991862	0.321265	0.580267
Atrnl1	1406.12	-0.372781	0.122503	-3.04303	0.00234209	0.0447259
Atrx	1817.38	-0.273921	0.149811	-1.82844	0.0674831	0.249571
Atxn1	885.513	-0.233659	0.157961	-1.47922	0.139081	0.370157
Atxn10	1249.08	-0.0278658	0.0968296	-0.287782	0.773513	0.89216
Atxn1l	1083.79	-0.125649	0.128869	-0.975016	0.329552	0.5879
Atxn2	1291.23	-0.276284	0.16688	-1.65558	0.0978063	0.306704
Atxn2l	3435.26	-0.172564	0.160041	-1.07825	0.280921	0.54156
Atxn3	530.707	0.149124	0.0983814	1.51577	0.129577	0.355556
Atxn7	818.043	-0.414358	0.202093	-2.05033	0.040332	0.187432
Atxn7l1	289.791	0.103005	0.101668	1.01315	0.310988	0.569977
Atxn7l2	104.462	-0.18481	0.14133	-1.30765	0.190993	0.439147
Atxn7l3	1546	-0.0523284	0.0611988	-0.855055	0.392521	0.645238
Atxn7l3b	2129.97	0.190155	0.130289	1.45948	0.144432	0.37812
AU019823	413.509	0.0255899	0.0789666	0.324059	0.745893	0.876355
AU021092	41.8289	0.0617525	0.267355	0.230976	0.817334	0.914379
AU022252	115.967	-0.00263105	0.156728	-0.0167873	0.986606	0.993784
AU040320	1323.17	0.07132	0.133133	0.535706	0.592162	0.784638
AU041133	29.7515	0.283873	0.281739	1.00757	0.31366	0.573052
Auh	341.921	0.0449506	0.123006	0.365434	0.714788	0.860065
Aup1	1568.34	0.173887	0.0747205	2.32716	0.0199567	0.130944
Aurka	241.432	0.57133	0.158601	3.60231	0.000315399	0.018237
Aurkaip1	720.341	0.241905	0.0578403	4.1823	2.88579e-05	0.00611834
Aurkb	373.245	0.334	0.151916	2.19858	0.0279075	0.155387
Auts2	1045.07	-0.0865892	0.203533	-0.42543	0.670523	0.832113
Aven	330.648	0.160295	0.0813227	1.9711	0.0487127	0.207987
Avil	108.016	-0.711125	0.305106	-2.33074	0.0197668	0.13022
Avl9	904.863	-0.0169099	0.1741	-0.0971277	0.922625	0.965533
Avpi1	201.818	0.286948	0.125014	2.29532	0.0217147	0.13679
Avpr1a	145.52	-0.152659	0.225562	-0.676795	0.498536	0.719563
AW011738	47.3758	0.523511	0.351661	1.48868	0.136571	0.366777
AW112010	1116.18	0.316072	0.208466	1.51618	0.129474	0.355482
AW146154	40.5464	0.0237558	0.27012	0.0879452	0.92992	0.969802
AW209491	149.911	0.503397	0.208133	2.41863	0.015579	0.114019
AW549542	36.5715	-0.48294	0.267952	-1.80234	0.0714921	0.258476
AW549877	926.155	-0.116742	0.0932367	-1.25211	0.210531	0.463157
AW551984	497.99	-0.630383	0.194558	-3.24008	0.00119496	0.0326903
AW554918	139.595	-0.274932	0.127465	-2.15692	0.0310117	0.164303
Axin1	1339.52	-0.101592	0.185972	-0.546277	0.584876	0.7791
Axin2	415.324	-0.280626	0.212945	-1.31783	0.187561	0.434653
Axl	4015.2	0.0098662	0.165701	0.0595421	0.95252	0.979063
Azgp1	45.0136	0.0301042	0.271023	0.111076	0.911556	0.960849
Azi1	223.533	0.080144	0.178407	0.449221	0.653272	0.821921
Azi2	1245.01	-0.00642478	0.081797	-0.0785455	0.937394	0.972572
Azin1	4393.26	-0.0922578	0.126512	-0.729241	0.465854	0.696822
B230118H07Rik	168.955	-0.173108	0.140434	-1.23266	0.217701	0.47143
B230120H23Rik	1394.54	-0.0667312	0.122633	-0.544154	0.586336	0.779922
B230206H07Rik	43.5957	-0.631725	0.26382	-2.39453	0.0166417	0.118164
B230217C12Rik	22.3841	-0.867903	0.416566	-2.08347	0.0372083	0.179632
B230219D22Rik	1483.86	-0.0565667	0.130275	-0.434211	0.664135	0.827785
B2m	11757.5	0.199757	0.189747	1.05275	0.292454	0.552453
B330016D10Rik	35.1905	-0.227121	0.204088	-1.11286	0.265768	0.52604
B3galnt1	252.892	-0.0380387	0.230852	-0.164775	0.869121	0.939535
B3galnt2	350.028	0.0416969	0.145317	0.286937	0.774161	0.892273
B3galt1	87.9176	-0.614571	0.179269	-3.42821	0.00060757	0.0239499
B3galt2	85.8246	-0.577412	0.311928	-1.85111	0.0641542	0.242414
B3galt4	60.5927	0.142217	0.21091	0.674302	0.500119	0.720319
B3galt5	4564.32	-0.111031	0.524064	-0.211865	0.832213	0.919864
B3galt6	93.2937	0.498746	0.228522	2.18248	0.0290739	0.158334
B3galtl	417.383	-0.22773	0.0909913	-2.50277	0.0123227	0.0989976
B3gat2	29.4105	-0.223624	0.256158	-0.872994	0.382666	0.635856
B3gat3	527.267	0.155334	0.120651	1.28747	0.197932	0.448033
B3gnt1	293.876	-0.222957	0.189669	-1.1755	0.239793	0.497897
B3gnt2	1379.05	-0.156584	0.108896	-1.43792	0.150458	0.387982
B3gnt3	1728.83	0.243498	0.173276	1.40526	0.159943	0.399069
B3gnt5	571.043	0.0433607	0.210013	0.206467	0.836426	0.922796
B3gnt6	530.709	-0.238743	0.327407	-0.729194	0.465883	0.696822
B3gnt7	551.879	0.522983	0.545522	0.958684	0.337718	0.593945
B3gnt8	30.0533	0.0320307	0.415889	0.0770175	0.93861	0.972584
B3gnt9	188.64	0.0352704	0.162334	0.217271	0.827997	0.918145
B3gntl1	79.2714	0.108571	0.188538	0.575858	0.564711	0.764956
B4galnt1	1320.38	0.0916159	0.094848	0.965924	0.334082	0.591256
B4galnt2	5478.91	0.283	0.213751	1.32397	0.185512	0.431522
B4galnt3	173.112	0.0462302	0.372686	0.124046	0.901279	0.955689
B4galnt4	110.923	0.024534	0.203041	0.120832	0.903824	0.956566
B4galt1	3424.69	0.051619	0.208522	0.247547	0.804485	0.907579
B4galt2	340.92	-0.176509	0.20123	-0.877151	0.380404	0.633961
B4galt3	696.235	0.0726595	0.120796	0.601508	0.547501	0.753243
B4galt4	282.639	0.424598	0.121137	3.50511	0.000456425	0.0212897
B4galt5	2059.32	-0.0381074	0.130312	-0.292432	0.769957	0.890137
B4galt6	1005.68	-0.224201	0.192972	-1.16183	0.245304	0.50417
B4galt7	268.838	0.0861955	0.127607	0.675476	0.499374	0.719796
B630005N14Rik	569.79	-0.268451	0.159075	-1.68758	0.0914923	0.295618
B630019K06Rik	70.203	-0.382577	0.199023	-1.92228	0.0545711	0.220905
B930041F14Rik	71.2581	-0.290257	0.32208	-0.901197	0.367484	0.621873
B9d1	80.7978	-0.145294	0.194002	-0.748931	0.453899	0.690233
B9d2	92.4451	-0.174117	0.133386	-1.30536	0.19177	0.440233
Babam1	734.56	0.116773	0.0899441	1.29829	0.194189	0.443915
Bace1	1157.59	-0.233204	0.0808888	-2.88302	0.00393882	0.0580005
Bace2	798.459	0.079188	0.131049	0.604261	0.54567	0.75223
Bach1	2381.26	-0.179386	0.258427	-0.694144	0.487592	0.712639
Bach2	233.153	-0.501562	0.294029	-1.70583	0.0880403	0.289254
Bad	379.545	0.0723291	0.106025	0.682187	0.49512	0.717689
Bag1	2461.33	0.155267	0.086384	1.79741	0.0722713	0.259835
Bag2	1636.67	-0.262023	0.149372	-1.75416	0.079403	0.27293
Bag3	2207.31	-0.115002	0.200185	-0.574478	0.565644	0.765533
Bag4	475.246	-0.16948	0.185825	-0.91204	0.361748	0.61682
Bag5	534.241	0.0173093	0.0770041	0.224785	0.822147	0.916355
Bag6	3069.46	-0.0149534	0.059279	-0.252255	0.800844	0.905479
Bahcc1	396.661	-0.221259	0.140578	-1.57393	0.115504	0.335007
Bahd1	980.522	-0.156654	0.181955	-0.860948	0.389267	0.642491
Bai1	82.3601	-0.52657	0.205519	-2.56215	0.0104026	0.0916576
Bai2	367.699	-0.593429	0.159131	-3.72917	0.000192108	0.0142444
Bai3	64.15	-0.826172	0.269353	-3.06725	0.00216039	0.0433644
Baiap2	804.936	-0.102949	0.223777	-0.46005	0.64548	0.817102
Baiap2l1	1908.92	-0.109237	0.261196	-0.41822	0.675786	0.834751
Baiap2l2	927.586	0.0180616	0.182909	0.0987464	0.92134	0.96483
Baiap3	51.9272	-0.667634	0.240821	-2.77232	0.00556586	0.067552
Bak1	2179.38	0.269244	0.100294	2.68454	0.00726297	0.0764756
Bambi	238.814	-0.212373	0.169828	-1.25052	0.21111	0.464075
Banf1	1390.34	0.268108	0.075417	3.55501	0.000377967	0.0191868
Banp	238.924	0.26631	0.207829	1.28139	0.200056	0.450028
Bap1	1118.26	-0.0825204	0.0531207	-1.55345	0.120315	0.341488
Bard1	88.2457	0.349947	0.204817	1.70859	0.0875277	0.288829
Basp1	1655.34	-0.153468	0.196617	-0.780546	0.43507	0.676605
Batf	61.7965	-0.489307	0.186645	-2.6216	0.00875189	0.0840821
Batf2	59.4938	0.778156	0.389793	1.99633	0.0458981	0.201746
Batf3	48.322	0.479054	0.27354	1.75131	0.079892	0.273886
Bax	742.244	0.201205	0.0930843	2.16154	0.0306539	0.163371
Baz1a	1163.85	-0.327585	0.330168	-0.992177	0.321111	0.580181
Baz1b	2231.86	-0.186618	0.106781	-1.74766	0.0805225	0.275173
Baz2a	2505.55	-0.218136	0.1937	-1.12616	0.2601	0.521237
Baz2b	983.352	-0.444796	0.247039	-1.80051	0.0717808	0.259033
Bbc3	185.408	0.0135634	0.160166	0.0846838	0.932513	0.97064
Bbip1	338.485	0.0437806	0.0627824	0.697339	0.485591	0.711245
Bbs1	70.8777	-0.394837	0.233972	-1.68754	0.0914997	0.295618
Bbs12	30.4802	0.374203	0.368802	1.01465	0.310275	0.569396
Bbs2	145.621	-0.145364	0.152413	-0.953751	0.34021	0.596499
Bbs4	120.97	-0.222818	0.175891	-1.2668	0.205228	0.455809
Bbs5	63.2188	0.320441	0.147359	2.17457	0.0296624	0.160236
Bbs7	88.75	0.156032	0.149488	1.04377	0.29659	0.556322
Bbs9	115.632	-0.30288	0.172244	-1.75844	0.0786731	0.271978
Bbx	694.981	-0.0642355	0.0914469	-0.702435	0.482408	0.708879
BC003331	502.294	-0.0756225	0.0967493	-0.781633	0.43443	0.676064
BC003965	318.635	0.292586	0.159111	1.83888	0.0659333	0.245985
BC004004	719.381	0.0907563	0.100235	0.905438	0.365234	0.619583
BC005537	2316.88	-0.149134	0.109292	-1.36455	0.172395	0.414609
BC005561	210.527	-0.45133	0.239321	-1.88588	0.0593114	0.230433
BC005624	345.594	0.0218963	0.100071	0.218807	0.8268	0.917772
BC005764	224.409	-0.0660872	0.171217	-0.385985	0.699508	0.850733
BC016423	743.429	-0.151926	0.177616	-0.855362	0.392351	0.645075
BC016579	576.936	-0.568969	0.460567	-1.23537	0.216694	0.470189
BC017158	299.114	0.0350684	0.161407	0.217266	0.828001	0.918145
BC017612	226.632	0.320378	0.136071	2.35449	0.0185483	0.125841
BC017643	406.789	0.115504	0.0821003	1.40686	0.159468	0.398495
BC018242	156.092	-0.146847	0.209714	-0.700226	0.483786	0.709752
BC018507	968.952	-0.129493	0.141332	-0.916236	0.359543	0.615058
BC021614	121.031	0.601778	0.216858	2.77499	0.0055204	0.0673927
BC021767	32.1522	-0.08295	0.219191	-0.378437	0.705106	0.854325
BC021891	411.72	-0.058194	0.181639	-0.320383	0.748678	0.87814
BC022687	114.302	0.0701138	0.2849	0.246099	0.805605	0.907734
BC023829	294.048	-0.0363059	0.0873129	-0.415813	0.677547	0.835822
BC024978	46.988	0.100245	0.20577	0.487171	0.626137	0.805848
BC026585	155.129	0.0249076	0.131582	0.189293	0.849863	0.929412
BC026590	205.49	0.236035	0.088944	2.65375	0.00796023	0.0804052
BC027231	410.942	0.0423667	0.152234	0.278301	0.780781	0.896466
BC029214	165.669	-0.0656953	0.141393	-0.464629	0.642197	0.81538
BC029722	147.236	0.141834	0.170028	0.83418	0.40418	0.65305
BC030336	277.636	-0.301482	0.104857	-2.87517	0.00403806	0.0586554
BC030867	77.536	0.190999	0.138765	1.37642	0.168692	0.410727
BC030870	778.819	0.180276	0.243021	0.741812	0.458201	0.69328
BC031181	870.165	0.106177	0.0743961	1.42719	0.153526	0.391337
BC037034	324.763	0.108846	0.163948	0.663903	0.506752	0.725707
BC048403	101.538	0.289165	0.164514	1.75769	0.0788002	0.27221
BC052040	96.1538	0.216056	0.163764	1.31931	0.187064	0.43419
BC053749	48.6823	0.0228137	0.236229	0.0965746	0.923064	0.965695
BC055324	54.3809	0.145261	0.187954	0.772853	0.439609	0.679696
BC056474	383.412	0.227491	0.114371	1.98907	0.046694	0.203693
BC068157	43.94	-0.509127	0.14662	-3.47241	0.000515803	0.0223831
BC068281	35.8566	-0.254865	0.33957	-0.75055	0.452924	0.689426
Bcam	836.888	-0.199941	0.184621	-1.08298	0.278817	0.539157
Bcan	29.711	-0.392085	0.380823	-1.02957	0.303211	0.562673
Bcap29	273.105	0.0104114	0.133061	0.078245	0.937633	0.972572
Bcap31	2068.62	0.0991841	0.0778343	1.2743	0.202558	0.452882
Bcar1	2788.37	-0.246641	0.147571	-1.67134	0.0946536	0.301421
Bcar3	840.039	-0.0226423	0.219653	-0.103082	0.917898	0.96341
Bcas1	1175.78	-0.0712987	0.198551	-0.359094	0.719524	0.862628
Bcas2	749.31	0.0758247	0.0612449	1.23806	0.215695	0.469178
Bcas3	310.619	-0.235013	0.106007	-2.21696	0.0266259	0.151865
Bcat1	134.053	0.419144	0.289736	1.44664	0.147998	0.383827
Bcat2	606.055	0.273367	0.169288	1.6148	0.106353	0.320549
Bccip	758.159	0.201323	0.0780699	2.57875	0.00991576	0.0895785
Bcdin3d	39.5165	0.331528	0.219395	1.5111	0.130763	0.357437
Bche	782.425	-0.294767	0.156043	-1.88901	0.0588904	0.229556
Bckdha	679.246	0.0188765	0.0894584	0.211009	0.83288	0.920084
Bckdhb	152.363	-0.0989022	0.154952	-0.638276	0.523294	0.737339
Bckdk	750.324	0.179496	0.112152	1.60048	0.109493	0.32709
Bcl10	1315.59	-0.109114	0.169214	-0.644828	0.519039	0.734011
Bcl11a	278.706	-0.225861	0.159861	-1.41286	0.157698	0.39626
Bcl11b	187.569	0.320024	0.153777	2.08109	0.0374254	0.180208
Bcl2	369.27	-0.220847	0.118304	-1.86677	0.0619343	0.236795
Bcl2a1b	51.681	0.198201	0.238884	0.829694	0.406712	0.654838
Bcl2l1	882.601	0.0893731	0.0697001	1.28225	0.199754	0.449697
Bcl2l11	214.554	-0.326152	0.206055	-1.58284	0.113458	0.33179
Bcl2l12	96.0962	0.321909	0.21778	1.47814	0.139371	0.370382
Bcl2l13	1103.38	0.0554792	0.13852	0.400515	0.688777	0.843483
Bcl2l14	535.259	0.161558	0.173616	0.930551	0.352086	0.608593
Bcl2l2	1222.24	-0.0406096	0.0647357	-0.627313	0.530454	0.741987
Bcl3	2065.57	0.127024	0.185195	0.685894	0.49278	0.716673
Bcl6	586.407	-0.647314	0.248385	-2.6061	0.00915809	0.0861954
Bcl6b	173.06	0.280025	0.196406	1.42574	0.153943	0.391793
Bcl7a	231.483	-0.0573579	0.159901	-0.358708	0.719814	0.862823
Bcl7b	526.395	0.0106686	0.0908079	0.117486	0.906475	0.958564
Bcl7c	202.497	0.167741	0.152558	1.09952	0.27154	0.532627
Bcl9	1136.61	-0.0941916	0.168559	-0.558806	0.576294	0.772822
Bcl9l	1102.36	-0.596508	0.220797	-2.70161	0.00690047	0.0743706
Bclaf1	1776.09	-0.00678286	0.0789421	-0.0859219	0.931528	0.970492
Bco2	186.24	0.0194037	0.137766	0.140846	0.887992	0.948603
Bcor	1561.29	-0.386477	0.165099	-2.34088	0.0192382	0.12853
Bcorl1	483.082	-0.402268	0.20044	-2.00693	0.0447576	0.198599
Bcr	1604.25	-0.178372	0.114131	-1.56287	0.118083	0.338244
Bcs1l	157.765	0.329461	0.156577	2.10415	0.0353654	0.175035
Bdh1	2936.51	0.122421	0.0840692	1.45619	0.14534	0.379472
Bdh2	32.9391	-0.170719	0.286221	-0.596459	0.550869	0.756017
Bdkrb1	123.549	0.191573	0.347073	0.551969	0.58097	0.775827
Bdkrb2	539.662	0.0284806	0.246527	0.115527	0.908027	0.959098
Bdnf	92.8401	0.245277	0.247478	0.991106	0.321634	0.580417
Bdp1	1129.69	-0.343471	0.258857	-1.32688	0.18455	0.430268
Bean1	226.207	-0.426558	0.230478	-1.85075	0.0642054	0.242472
Becn1	1279.89	0.0453657	0.0628421	0.721899	0.470357	0.700294
Begain	79.935	-0.509395	0.201735	-2.52506	0.0115677	0.0961194
Bend3	281.266	-0.158354	0.155137	-1.02074	0.307378	0.566841
Bend4	77.728	-0.207213	0.2782	-0.744835	0.456372	0.692132
Bend5	146.671	-0.415062	0.236461	-1.75531	0.0792069	0.272728
Bend6	31.7408	-0.280336	0.331618	-0.845359	0.397911	0.648559
Bend7	153.347	-0.267776	0.242643	-1.10358	0.269774	0.530715
Best2	141.78	0.0741643	0.358857	0.206668	0.836269	0.922773
Bet1	398.192	0.197167	0.118907	1.65817	0.0972837	0.306061
Bet1l	357.651	0.192585	0.136972	1.40602	0.159719	0.398828
Beta-s	658.074	0.341517	0.211368	1.61574	0.10615	0.320435
Bex1	164.149	-0.0501608	0.134386	-0.37326	0.708955	0.857305
Bex2	293.17	-0.442796	0.201163	-2.20117	0.0277237	0.155077
Bex4	60.9063	0.0474991	0.215085	0.220839	0.825218	0.917307
Bfar	745.059	-0.027385	0.0708494	-0.386523	0.699109	0.850344
Bfsp1	56.2482	0.21218	0.186343	1.13865	0.254848	0.515586
Bglap3	150.826	-0.274987	0.453712	-0.606084	0.544459	0.751323
Bgn	5657.62	-0.10247	0.139498	-0.734566	0.462604	0.69529
Bhlha15	51.4908	0.105617	0.405763	0.260293	0.794638	0.90274
Bhlhb9	297.873	0.0960874	0.146838	0.654379	0.512868	0.729848
Bhlhe40	9383.88	0.0078525	0.170232	0.0461281	0.963208	0.983355
Bhlhe41	69.0172	-0.393823	0.466853	-0.843569	0.39891	0.649151
Bicc1	393.757	-0.207644	0.11241	-1.8472	0.0647176	0.243526
Bicd1	98.2413	-0.183197	0.156416	-1.17121	0.241512	0.499967
Bicd2	1455.37	-0.117778	0.126249	-0.932899	0.350872	0.607114
Bid	247.452	0.233156	0.100669	2.31606	0.0205547	0.132957
Bik	99.2283	0.104127	0.207555	0.501687	0.615888	0.799409
Bin1	937.938	-0.178185	0.0980596	-1.81711	0.0692004	0.253368
Bin2	60.9971	0.0182592	0.202117	0.0903398	0.928017	0.968494
Bin3	324.234	0.221884	0.0684576	3.24119	0.0011903	0.0326903
Birc2	645.055	-0.128786	0.171835	-0.749472	0.453573	0.68997
Birc3	1234.65	-0.240958	0.169159	-1.42445	0.154317	0.392122
Birc5	331.245	0.47665	0.150536	3.16635	0.00154367	0.0375377
Birc6	2193.64	-0.28993	0.205305	-1.41219	0.157894	0.396267
Bivm	160.692	0.150501	0.104469	1.44063	0.14969	0.386589
Blcap	668.495	0.0516921	0.0960528	0.538164	0.590464	0.783396
Blm	152.045	0.11198	0.153511	0.729459	0.465721	0.696822
Blmh	1454.68	0.17364	0.0780143	2.22575	0.0260312	0.149722
Blnk	1195.42	-0.0771751	0.272991	-0.282702	0.777405	0.893647
Bloc1s1	583.846	0.0931212	0.122477	0.760319	0.447064	0.684597
Bloc1s2a	186.018	0.309751	0.0909515	3.40567	0.000660007	0.0249461
Bloc1s3	126.192	0.195535	0.146018	1.33912	0.180533	0.42536
Bloc1s4	164.855	0.199544	0.122476	1.62925	0.103261	0.315892
Bloc1s5	185.654	0.309787	0.14577	2.12518	0.0335715	0.170683
Bloc1s6	326.163	0.140857	0.116468	1.20941	0.226507	0.481024
Blvra	241.779	0.158514	0.128519	1.23339	0.217432	0.471073
Blvrb	557.196	0.229496	0.098186	2.33736	0.0194203	0.128867
Blzf1	354.019	0.0469005	0.0798161	0.587607	0.556796	0.760383
Bmf	278.69	-0.0496897	0.143835	-0.345464	0.729745	0.867372
Bmi1	454.171	-0.0878967	0.0871213	-1.0089	0.313023	0.572406
Bmp1	2128.27	-0.244856	0.15138	-1.61749	0.105772	0.319791
Bmp2	967.488	0.116893	0.16463	0.710036	0.477682	0.70523
Bmp2k	550.757	-0.35159	0.245466	-1.43234	0.152048	0.389417
Bmp3	390.197	0.133475	0.161651	0.825694	0.408978	0.656426
Bmp4	1021.1	-0.209691	0.139015	-1.50841	0.131449	0.358376
Bmp5	748.782	-0.023973	0.113626	-0.210981	0.832902	0.920084
Bmp6	191.848	-0.0744418	0.155372	-0.47912	0.631853	0.809552
Bmp7	321.506	-0.234007	0.125472	-1.86501	0.0621801	0.237334
Bmp8a	50.4662	-0.450442	0.4026	-1.11883	0.263211	0.523667
Bmp8b	48.2784	-0.55639	0.613303	-0.907202	0.3643	0.618594
Bmper	161.503	0.00388847	0.274275	0.0141773	0.988689	0.994457
Bmpr1a	2877.84	-0.414602	0.112244	-3.69376	0.000220961	0.015297
Bmpr2	707.12	-0.505094	0.237826	-2.1238	0.0336869	0.17107
Bms1	821.49	0.159783	0.0774938	2.06188	0.0392191	0.184651
Bmyc	162.629	0.253829	0.246434	1.03001	0.303006	0.562524
Bnc2	136.324	-0.37157	0.21114	-1.75983	0.078437	0.271833
Bnip1	271.141	0.161488	0.102185	1.58035	0.114026	0.33245
Bnip2	1093.68	-0.113448	0.0713618	-1.58976	0.111889	0.330006
Bnip3	894.949	-0.43043	0.243884	-1.76489	0.0775816	0.269946
Bnip3l	967.347	-0.163932	0.0922866	-1.77633	0.0756782	0.266514
Bnipl	34.1041	0.0523338	0.331512	0.157864	0.874564	0.942346
Boc	875.806	-0.102087	0.178922	-0.570566	0.568294	0.76807
Bod1	629.339	-0.00045593	0.0619178	-0.00736346	0.994125	0.99665
Bod1l	717.994	-0.114963	0.114631	-1.00289	0.315912	0.575478
Bok	831.71	0.0509565	0.156941	0.324686	0.745419	0.876273
Bola1	124.766	0.313484	0.163385	1.91868	0.0550244	0.221485
Bola2	193.821	0.290071	0.13546	2.14139	0.0322429	0.167083
Bola3	311.754	0.26867	0.105107	2.55615	0.0105836	0.0925317
Bop1	786.701	0.259546	0.0867722	2.99112	0.00277959	0.0485375
Bora	194.542	0.248501	0.118291	2.10076	0.0356624	0.175837
Bpgm	1156.96	0.103421	0.1096	0.943624	0.345362	0.601414
Bphl	281.95	0.0484607	0.0837296	0.578776	0.56274	0.763353
Bpnt1	1354.4	0.0893298	0.110081	0.811488	0.417086	0.6621
Bptf	1871.83	-0.462814	0.222731	-2.07791	0.0377181	0.180612
Braf	1040.02	-0.313408	0.19008	-1.64882	0.0991837	0.309029
Brap	879.887	-0.0710775	0.0601217	-1.18223	0.237115	0.494403
Brca1	160.071	0.12893	0.133656	0.96464	0.334725	0.591931
Brca2	121.776	0.121407	0.172064	0.705592	0.480442	0.707358
Brcc3	465.439	0.118907	0.0900863	1.31992	0.18686	0.433939
Brd1	1909.52	-0.243204	0.17716	-1.37279	0.169817	0.411767
Brd2	5025.01	-0.22591	0.170865	-1.32216	0.186116	0.432507
Brd3	1258.61	-0.103757	0.0577417	-1.79692	0.0723483	0.259945
Brd4	2737.17	-0.155212	0.171033	-0.907499	0.364143	0.618534
Brd7	764.886	0.164349	0.0775196	2.1201	0.0339976	0.172068
Brd8	683.707	-0.00981446	0.0672765	-0.145882	0.884014	0.946742
Brd9	443.82	-0.108072	0.126925	-0.851466	0.39451	0.646355
Brdt	55.3252	-0.188585	0.217001	-0.869052	0.384819	0.637932
Bre	583.816	0.0957342	0.0919405	1.04126	0.297754	0.557403
Brf1	608.89	-0.0933949	0.0863484	-1.08161	0.279428	0.539954
Brf2	89.7474	0.254536	0.166588	1.52794	0.126527	0.351381
Bri3	807.65	0.13349	0.0781022	1.70917	0.0874191	0.288681
Bri3bp	635.331	0.09988	0.109065	0.915787	0.359779	0.615259
Brip1	96.3993	0.228786	0.166509	1.37401	0.169439	0.411144
Brix1	703.352	0.290812	0.0978242	2.9728	0.00295098	0.0497666
Brk1	1462.72	0.154135	0.0834355	1.84736	0.0646947	0.243511
Brms1	376.646	0.0912113	0.0868991	1.04962	0.293892	0.55394
Brms1l	250.995	-0.174078	0.102906	-1.69162	0.0907178	0.294134
Brox	665.302	0.00228707	0.0821199	0.0278504	0.977781	0.989744
Brpf1	1071.78	-0.0206423	0.160806	-0.128368	0.897858	0.954377
Brpf3	1612.38	-0.123542	0.106545	-1.15953	0.246242	0.505454
Brsk1	277.822	-0.407887	0.117472	-3.47221	0.000516201	0.0223831
Brsk2	105.255	-0.810035	0.317994	-2.54733	0.010855	0.0936971
Brwd1	986.975	-0.398169	0.166879	-2.38598	0.0170337	0.119788
Brwd3	403.566	-0.463452	0.342562	-1.3529	0.176088	0.419699
Bscl2	629.248	-0.108103	0.0972769	-1.1113	0.266441	0.526545
Bsdc1	1071.51	-0.0945501	0.14394	-0.656869	0.511265	0.72873
Bsg	13794.3	-0.0163407	0.101949	-0.160283	0.872658	0.941039
Bsn	339.236	-0.277438	0.148383	-1.86974	0.0615205	0.235878
Bspry	2075.8	0.0828873	0.209518	0.395609	0.692393	0.846175
Bst1	38.2349	0.256365	0.355276	0.721593	0.470545	0.700474
Bst2	389.534	0.52281	0.232186	2.25169	0.0243421	0.144804
Btaf1	1126.45	-0.291299	0.229779	-1.26774	0.204892	0.455543
Btbd1	992.997	0.070049	0.0898651	0.779491	0.435691	0.676738
Btbd10	551.494	-0.246574	0.155955	-1.58106	0.113865	0.332194
Btbd11	102.458	-0.0270598	0.242189	-0.11173	0.911037	0.960746
Btbd19	53.9784	0.110109	0.220898	0.498461	0.618159	0.800974
Btbd2	662.84	0.0639571	0.132422	0.482981	0.629109	0.807605
Btbd3	1605.9	-0.100023	0.143106	-0.698943	0.484588	0.71062
Btbd6	197.62	0.0245813	0.129098	0.190407	0.84899	0.929412
Btbd7	955.357	-0.533495	0.264094	-2.02009	0.0433741	0.19527
Btbd9	835.596	-0.110348	0.148629	-0.742442	0.457819	0.693223
Btc	409.964	-0.103633	0.272365	-0.380494	0.703579	0.853382
Btd	347.982	-0.0794588	0.147847	-0.537441	0.590963	0.783773
Btf3	3094.93	0.175571	0.0729333	2.40729	0.0160715	0.115935
Btf3l4	149.587	0.0387733	0.134192	0.288939	0.772628	0.891706
Btg1	4522.57	-0.226713	0.191157	-1.186	0.235621	0.492399
Btg2	8559.72	0.0876233	0.303713	0.288507	0.772959	0.891829
Btk	27.7944	-0.226724	0.253929	-0.892864	0.37193	0.625988
Btnl1	380.053	0.0479401	0.350605	0.136735	0.89124	0.95066
Btnl2	53.2125	0.122195	0.239811	0.509547	0.610369	0.795437
Btnl4	335.751	-0.0544786	0.227499	-0.239468	0.810743	0.911431
Btnl5	1401.35	-0.0751079	0.185249	-0.405444	0.685152	0.840505
Btnl6	547.272	-0.246379	0.239567	-1.02843	0.303746	0.563127
Btrc	398.112	-0.154249	0.084118	-1.83373	0.0666944	0.247667
Bub1	248.591	0.293457	0.117117	2.50567	0.0122218	0.0985369
Bub1b	540.148	0.366465	0.114083	3.21228	0.00131687	0.0341005
Bub3	1049.68	0.208488	0.0656078	3.17779	0.001484	0.0368603
Bud13	192.916	0.164785	0.122573	1.34439	0.178823	0.423638
Bud31	489.605	0.247243	0.112256	2.2025	0.0276303	0.155077
Bves	270.443	-0.56732	0.242567	-2.33881	0.0193451	0.128863
Bysl	564.898	0.306185	0.12446	2.46011	0.0138896	0.106179
Bzrap1	45.8776	-0.92389	0.337042	-2.74117	0.006122	0.0704766
Bzw1	5203.24	0.0491054	0.121216	0.405107	0.685399	0.840656
Bzw2	1338.86	0.176641	0.0664163	2.6596	0.00782336	0.0794457
C030006K11Rik	133.981	0.0817184	0.187766	0.435215	0.663406	0.827596
C030046E11Rik	1083.64	-0.435071	0.21432	-2.03	0.0423563	0.192529
C130074G19Rik	1246.74	-0.00859688	0.194847	-0.0441212	0.964808	0.984129
C1d	670.731	0.130807	0.107877	1.21256	0.225299	0.479901
C1galt1	1340.64	-0.129573	0.329383	-0.393382	0.694037	0.847574
C1galt1c1	694.893	0.046617	0.158182	0.294706	0.768219	0.889113
C1qa	509.096	0.215118	0.234424	0.917647	0.358803	0.61449
C1qb	504.367	0.313352	0.225369	1.39039	0.164409	0.405391
C1qbp	1723.27	0.351039	0.0948827	3.69971	0.000215845	0.0150195
C1qc	498.438	0.21955	0.216844	1.01248	0.311308	0.570135
C1ql1	72.0786	-0.561305	0.294083	-1.90866	0.056306	0.22409
C1qtnf1	490.189	-0.39276	0.198136	-1.98228	0.0474481	0.205432
C1qtnf2	212.277	-0.10137	0.204349	-0.496064	0.619849	0.802168
C1qtnf3	384.332	-0.294242	0.253168	-1.16224	0.245137	0.503903
C1qtnf6	1253.38	0.0246594	0.135015	0.182642	0.855079	0.93184
C1qtnf7	35.4608	-0.204695	0.260697	-0.785182	0.432347	0.674157
C1qtnf9	59.7146	-0.519666	0.225992	-2.29948	0.0214775	0.135674
C1ra	562.427	0.0186412	0.184246	0.101176	0.919411	0.963927
C1s	1794.69	-0.0983593	0.18142	-0.542165	0.587705	0.780946
C2	136.594	0.255194	0.262333	0.97279	0.330658	0.589105
C230052I12Rik	67.4912	0.434081	0.185627	2.33846	0.0193632	0.128867
C230081A13Rik	1119.7	-0.0156441	0.189428	-0.082586	0.934181	0.971232
C230091D08Rik	269.396	0.0364503	0.123892	0.294211	0.768597	0.889133
C2cd2	602.311	0.0354774	0.140171	0.253101	0.80019	0.905479
C2cd2l	937.901	-0.180837	0.157236	-1.1501	0.250103	0.510631
C2cd3	485.757	-0.0702132	0.0871903	-0.805287	0.420654	0.664272
C2cd4a	52.8912	0.500561	0.231507	2.16219	0.0306036	0.163277
C2cd4b	444.462	0.673446	0.345531	1.94902	0.0512932	0.213727
C2cd5	428.181	0.0307189	0.0938538	0.327306	0.743437	0.875136
C3	1188.8	-0.219929	0.343117	-0.640975	0.521539	0.736147
C330006A16Rik	855.578	0.126188	0.135144	0.933728	0.350444	0.606678
C330007P06Rik	362.647	0.0209863	0.0726808	0.288746	0.772776	0.891801
C330018D20Rik	88.5091	0.0281002	0.195021	0.144088	0.885431	0.946964
C330027C09Rik	389.161	0.14795	0.11068	1.33673	0.181309	0.426597
C3ar1	111.837	0.145182	0.238625	0.608411	0.542915	0.749733
C430049B03Rik	44.6836	0.63686	0.234359	2.71745	0.00657866	0.0723973
C4b	224.604	0.154371	0.306582	0.503522	0.614597	0.798663
C4bp	69.5969	-0.383549	0.463081	-0.828254	0.407527	0.655343
C530008M17Rik	989.21	-0.241107	0.128252	-1.87995	0.0601155	0.232461
C5ar1	105.829	0.107753	0.277683	0.388042	0.697985	0.849558
C630043F03Rik	62.4278	-0.0447705	0.348	-0.128651	0.897634	0.954377
C77080	4601.7	-0.0816845	0.238607	-0.342339	0.732096	0.868368
C77370	29.2814	-0.366254	0.187815	-1.95008	0.0511664	0.21369
C78339	385.453	-0.176242	0.135654	-1.29921	0.193873	0.443521
C87436	113.435	-0.113755	0.140446	-0.809956	0.417965	0.662234
Caap1	129.804	0.257683	0.102174	2.52199	0.0116691	0.0964303
Cab39	4807.42	-0.00604117	0.154741	-0.0390404	0.968858	0.98606
Cab39l	641.128	0.0548917	0.0762015	0.72035	0.47131	0.701074
Cabin1	1117.08	0.0208585	0.101162	0.20619	0.836643	0.922812
Cables1	343.537	-0.087919	0.229368	-0.38331	0.70149	0.852226
Cables2	412.041	0.00593049	0.0655017	0.0905394	0.927859	0.968494
Cabp1	27.7805	-0.14128	0.206213	-0.685116	0.493271	0.716932
Cacfd1	581.55	0.147766	0.124064	1.19105	0.233632	0.489902
Cachd1	763.744	-0.176962	0.184051	-0.961481	0.33631	0.592879
Cacna1a	128.049	-0.697964	0.188448	-3.70374	0.00021244	0.014887
Cacna1b	167.459	-0.854224	0.275754	-3.09777	0.00194983	0.0418118
Cacna1c	908.008	-0.696242	0.173133	-4.02143	5.78462e-05	0.00844466
Cacna1d	408.18	-0.643896	0.172113	-3.74112	0.000183203	0.0139936
Cacna1e	477.364	-0.875184	0.248684	-3.51926	0.00043276	0.0208565
Cacna1g	542.732	-0.420082	0.142609	-2.9457	0.00322226	0.0518496
Cacna1h	1573.86	-0.567901	0.207469	-2.73727	0.00619505	0.0707581
Cacna2d1	1684.96	-0.539854	0.114852	-4.70042	2.59629e-06	0.00220181
Cacna2d2	102.55	-0.620884	0.224434	-2.76644	0.00566724	0.0681333
Cacna2d3	84.9738	-0.455231	0.19188	-2.37247	0.0176694	0.122211
Cacnb1	195.165	-0.55834	0.282609	-1.97566	0.0481931	0.207006
Cacnb2	197.322	-0.273184	0.140081	-1.95018	0.0511547	0.21369
Cacnb3	1068.37	-0.282928	0.140431	-2.01471	0.0439354	0.196501
Cacnb4	62.4425	-0.770161	0.226086	-3.40649	0.000658039	0.0249412
Cacng4	31.2122	-0.553842	0.287785	-1.9245	0.0542922	0.219973
Cacng7	174.437	-0.251268	0.127281	-1.97412	0.0483686	0.207178
Cactin	538.09	0.0283984	0.0665075	0.426996	0.669383	0.831458
Cacul1	1296.48	-0.266068	0.177377	-1.50001	0.133612	0.361947
Cacybp	1010.07	0.293392	0.103164	2.84395	0.00445583	0.0612344
Cad	635.272	0.236898	0.171219	1.3836	0.166482	0.408309
Cadm1	469.273	-0.555777	0.153594	-3.61847	0.000296347	0.0174832
Cadm2	29.6253	-0.792898	0.368816	-2.14985	0.0315674	0.165573
Cadm3	506.248	-0.649275	0.256055	-2.53568	0.0112229	0.0952363
Cadm4	302.912	-0.405224	0.195596	-2.07174	0.0382896	0.18174
Cadps	208.932	-1.00173	0.253584	-3.95028	7.80587e-05	0.00976518
Cadps2	616.331	-0.165292	0.155853	-1.06056	0.288889	0.549857
Calb2	813.316	-0.581485	0.297587	-1.954	0.0507013	0.212967
Calca	25.3093	0.114223	0.357231	0.319745	0.749162	0.87814
Calcb	153.191	-0.482828	0.323508	-1.49247	0.135575	0.365416
Calcoco1	587.011	-0.188072	0.200354	-0.938703	0.347883	0.604176
Calcrl	955.266	-0.2353	0.149936	-1.56934	0.116569	0.336374
Cald1	12648	-0.259788	0.167221	-1.55356	0.120289	0.341488
Calhm2	41.3065	0.328538	0.39419	0.833451	0.40459	0.653169
Calm1	14493.2	0.0498785	0.0766341	0.650866	0.515133	0.730849
Calm2	8084.87	-0.0624964	0.0754752	-0.828039	0.407649	0.655377
Calm3	6701.35	0.110335	0.0759267	1.45317	0.146176	0.380849
Calml4	1472.91	0.275505	0.119096	2.31331	0.0207057	0.133179
Calr	14218.3	0.0436932	0.0785203	0.556458	0.577898	0.773706
Calu	9474.19	-0.212989	0.0736956	-2.89011	0.00385102	0.0572965
Caly	45.1864	-0.91998	0.369117	-2.49238	0.0126889	0.100774
Camk1	702.185	0.0482861	0.0982236	0.491594	0.623006	0.80426
Camk1d	2261.46	0.0511485	0.180287	0.283707	0.776635	0.893292
Camk2a	153.359	-0.648942	0.223919	-2.89811	0.00375421	0.0567903
Camk2b	349.125	-0.484302	0.167324	-2.8944	0.00379888	0.057161
Camk2d	2214.28	-0.119561	0.079047	-1.51253	0.130398	0.356729
Camk2g	2060.41	-0.347034	0.292587	-1.18609	0.235587	0.492399
Camk2n1	2262.3	0.0467524	0.0934146	0.500483	0.616735	0.800115
Camk2n2	100.081	-0.283818	0.251122	-1.1302	0.258392	0.519965
Camk4	164.636	-0.932645	0.233011	-4.00257	6.26569e-05	0.00885616
Camkk1	211.199	-0.0365248	0.157081	-0.232523	0.816132	0.914059
Camkk2	362.66	0.299779	0.262235	1.14317	0.252968	0.513526
Camkmt	134.355	0.0718986	0.115638	0.621757	0.534102	0.744374
Caml	320.124	0.169449	0.0823731	2.0571	0.0396768	0.18584
Camsap1	895.322	-0.466459	0.180385	-2.58591	0.00971219	0.0887439
Camsap2	1113.08	-0.737608	0.233411	-3.16012	0.00157704	0.0379412
Camsap3	1285.19	-0.0328888	0.206705	-0.15911	0.873582	0.941438
Camta1	313.968	-0.395498	0.175795	-2.24977	0.0244638	0.145019
Camta2	1324.07	-0.218997	0.0740713	-2.95657	0.00311078	0.0511253
Cand1	2280.57	-0.0759753	0.13459	-0.564493	0.572419	0.770276
Cand2	90.6936	0.0511234	0.218222	0.234272	0.814774	0.913337
Cant1	2404.08	0.112098	0.0904952	1.23871	0.215452	0.469108
Canx	7142.57	0.101042	0.0674087	1.49895	0.133887	0.362472
Cap1	5498.08	0.0189713	0.0899462	0.210919	0.832951	0.920084
Cap2	565.288	-0.360084	0.188265	-1.91264	0.0557944	0.222997
Capg	523.675	0.350311	0.191126	1.83288	0.0668203	0.247863
Capn1	2802.14	0.108812	0.0898012	1.2117	0.225627	0.480317
Capn10	185.611	0.198721	0.132888	1.49541	0.134809	0.364096
Capn13	151.766	-0.129798	0.369105	-0.351656	0.725096	0.86518
Capn2	3701.54	-0.0675597	0.0923467	-0.731587	0.464421	0.696554
Capn5	1530.52	-0.256359	0.204744	-1.25209	0.210535	0.463157
Capn6	104.776	-0.440757	0.1965	-2.24304	0.0248943	0.146389
Capn7	879.207	-0.0473003	0.0965146	-0.490085	0.624074	0.804788
Capn8	135.617	-0.101676	0.242038	-0.420084	0.674424	0.834208
Capn9	324.423	-0.309947	0.323119	-0.959237	0.337439	0.593945
Capns1	5563.17	0.0495201	0.0601226	0.823652	0.410137	0.657667
Caprin1	5012.65	0.0287555	0.0840617	0.342076	0.732294	0.868499
Caprin2	115.539	0.0226167	0.175917	0.128564	0.897703	0.954377
Capsl	24.7026	0.0832722	0.228819	0.363922	0.715916	0.86038
Capza1	972.498	0.0836349	0.117635	0.710969	0.477103	0.705055
Capza2	3681.45	0.0235926	0.129134	0.182698	0.855035	0.93184
Capzb	5065.16	0.0240902	0.0527314	0.456847	0.647781	0.818491
Car1	8312.69	0.36604	0.6928	0.528348	0.597258	0.78722
Car11	56.7128	-0.895801	0.350664	-2.55458	0.0106316	0.0926523
Car12	843.346	0.086354	0.132446	0.651991	0.514407	0.730353
Car13	648.049	0.194123	0.141761	1.36937	0.170885	0.4131
Car2	9186.93	-0.0101599	0.266975	-0.0380557	0.969643	0.986215
Car3	128.122	-1.4903	0.666285	-2.23673	0.0253042	0.147552
Car4	467.345	-0.26922	0.897538	-0.299954	0.764212	0.886797
Car5b	33.8794	0.222037	0.253379	0.876305	0.380864	0.634417
Car8	1563.74	0.0383752	0.125402	0.306018	0.759591	0.884231
Car9	536.033	0.0446393	0.210149	0.212418	0.831781	0.919806
Card10	728.109	0.0698056	0.117261	0.595299	0.551644	0.756697
Card11	84.0778	0.351556	0.325662	1.07951	0.28036	0.541062
Card14	280.611	0.165943	0.317993	0.521844	0.601779	0.789855
Card6	61.8998	0.13447	0.157964	0.851266	0.394622	0.646449
Carf	37.4695	-0.0784414	0.179054	-0.438087	0.661324	0.826417
Carhsp1	2241.43	0.0140905	0.0971342	0.145062	0.884662	0.946901
Carkd	572.906	0.188135	0.0828493	2.27081	0.0231587	0.140978
Carm1	1072.23	0.0721917	0.0884701	0.816001	0.4145	0.66088
Carns1	37.5666	-0.555342	0.32878	-1.6891	0.0912003	0.295064
Cars	1097.76	0.181675	0.195492	0.929322	0.352722	0.609382
Cars2	216.395	0.129298	0.143483	0.90114	0.367514	0.621873
Cartpt	110.708	-0.725451	0.377669	-1.92086	0.054749	0.221032
Casc3	1041.87	-0.0291035	0.0577591	-0.503878	0.614347	0.798628
Casc4	900.02	-0.26179	0.068563	-3.81824	0.000134407	0.0122859
Casc5	161.311	0.218636	0.179798	1.21601	0.22398	0.478688
Casd1	723.236	0.0168831	0.114088	0.147983	0.882356	0.94605
Cask	1231.18	-0.0935754	0.115233	-0.812051	0.416763	0.662025
Caskin1	137.725	-0.98628	0.238835	-4.12955	3.63468e-05	0.00641029
Caskin2	1680.4	-0.200541	0.107064	-1.87309	0.0610556	0.234861
Casp1	1368.91	0.142796	0.134262	1.06356	0.287526	0.548676
Casp12	301.712	0.0134242	0.181621	0.0739134	0.941079	0.974113
Casp2	1065.65	0.187535	0.144933	1.29394	0.195686	0.445289
Casp3	740.982	0.065414	0.205699	0.318009	0.750478	0.878553
Casp4	596.536	0.108037	0.195289	0.553217	0.580115	0.775296
Casp6	475.833	0.176694	0.100911	1.751	0.0799464	0.273938
Casp7	1528.93	0.167429	0.142202	1.1774	0.239034	0.496929
Casp8	1785.07	0.306699	0.265196	1.1565	0.247478	0.506872
Casp8ap2	328.438	-0.0577977	0.124651	-0.463677	0.642879	0.815699
Casp9	438.156	0.0863559	0.137614	0.627521	0.530317	0.741987
Casq1	49.7131	-0.0367337	0.301655	-0.121774	0.903078	0.956213
Casq2	75.6999	-0.530232	0.371334	-1.42791	0.153318	0.39112
Cass4	26.9938	0.190787	0.258882	0.736963	0.461145	0.694481
Cast	2437.39	-0.10922	0.194779	-0.560738	0.574976	0.771849
Casz1	1125.65	-0.36272	0.17869	-2.02989	0.0423681	0.192529
Cat	2199.34	0.145182	0.190225	0.763209	0.445339	0.68363
Cav1	7028.27	0.0219933	0.135344	0.1625	0.870912	0.940353
Cav2	817.382	-0.0136619	0.126689	-0.107838	0.914124	0.962053
Cav3	115.653	0.141577	0.23709	0.597144	0.550411	0.755465
Cbfa2t2	530.696	-0.166373	0.104971	-1.58495	0.112978	0.331244
Cbfa2t3	351.204	-0.193656	0.239662	-0.808038	0.419069	0.663061
Cbfb	1019.42	0.00312326	0.0746083	0.0418621	0.966609	0.985122
Cbl	562.559	-0.516654	0.325183	-1.58881	0.112103	0.330104
Cblb	724.982	-0.360595	0.187679	-1.92134	0.0546885	0.220919
Cblc	698.188	0.252633	0.196438	1.28607	0.198418	0.448424
Cbll1	283.193	0.0215242	0.129371	0.166375	0.867862	0.939001
Cbln2	62.3885	-1.004	0.428688	-2.34204	0.0191789	0.128373
Cbln3	31.1976	-0.18182	0.217297	-0.836733	0.402743	0.651815
Cbln4	26.9083	-0.322816	0.260633	-1.23859	0.215498	0.469108
Cbr1	2190.33	0.174379	0.172216	1.01256	0.31127	0.570135
Cbr2	91.5133	0.200599	0.282467	0.71017	0.477599	0.70523
Cbr3	440.117	0.50483	0.31383	1.60861	0.107702	0.323462
Cbr4	148.515	0.0577093	0.115033	0.501677	0.615895	0.799409
Cbs	643.164	0.123199	0.224588	0.548553	0.583312	0.77796
Cbwd1	163.023	0.145458	0.106573	1.36486	0.172295	0.414609
Cbx1	483.787	0.129505	0.0915868	1.41401	0.157358	0.395992
Cbx2	83.0167	0.114631	0.159438	0.718971	0.472159	0.701876
Cbx3	258.92	0.123626	0.0808626	1.52884	0.126305	0.351123
Cbx4	562.599	0.0499955	0.152545	0.327742	0.743107	0.874975
Cbx5	1563.17	0.0465603	0.13626	0.341702	0.732575	0.868681
Cbx6	1659.38	-0.298057	0.19192	-1.55303	0.120416	0.341488
Cbx7	207.619	-0.150384	0.127173	-1.18252	0.237001	0.494368
Cbx8	48.1478	0.296891	0.266475	1.11414	0.265218	0.525747
Cby1	165.712	-0.0422167	0.177156	-0.238302	0.811647	0.911843
Cc2d1a	682.122	0.0516799	0.0635132	0.813687	0.415824	0.661313
Cc2d1b	588.32	0.0559622	0.0879582	0.636237	0.524622	0.73852
Cc2d2a	257.39	-0.0771447	0.145477	-0.53029	0.595911	0.786635
Ccar1	1623.1	-0.00273907	0.114229	-0.0239788	0.98087	0.991351
Ccbe1	112.834	-0.456053	0.264535	-1.72398	0.0847111	0.283984
Ccbl1	203.497	0.108969	0.0974416	1.1183	0.263439	0.523667
Ccbl2	64.2535	0.461248	0.239529	1.92565	0.0541486	0.21962
Ccbp2	42.7491	0.231867	0.257375	0.900892	0.367646	0.62194
Ccdc101	371.818	0.351768	0.132979	2.6453	0.00816197	0.0811559
Ccdc102a	323.429	-0.230748	0.143317	-1.61005	0.107386	0.322729
Ccdc104	392.364	-0.202626	0.116712	-1.73611	0.0825438	0.279172
Ccdc106	69.1754	-0.475245	0.246254	-1.9299	0.0536196	0.218882
Ccdc107	599.891	-0.16517	0.141856	-1.16435	0.244282	0.502679
Ccdc109b	129.995	0.190534	0.220127	0.865562	0.386731	0.639995
Ccdc111	109.465	0.0497505	0.156447	0.318002	0.750484	0.878553
Ccdc112	85.5149	0.118554	0.119242	0.994232	0.32011	0.579143
Ccdc114	44.7924	-0.161576	0.257799	-0.626752	0.530822	0.742013
Ccdc115	331.687	0.235226	0.116806	2.01382	0.0440282	0.196649
Ccdc116	113.507	-0.260856	0.202456	-1.28846	0.197587	0.447738
Ccdc117	610.197	-0.0980833	0.125553	-0.781211	0.434679	0.67627
Ccdc12	634.884	0.13093	0.084846	1.54315	0.122795	0.345192
Ccdc120	380.204	-0.34791	0.25842	-1.3463	0.178207	0.422891
[truncated: 11,572 more rows]
