# Supplementary material for: Supplementation with short-chain fatty acids and a prebiotic improves clinical outcome in Parkinson’s disease: a randomized double-blind prospective study
Source: Sci Rep. 2025 Dec 5;16:315. doi: 10.1038/s41598-025-29692-x (PMC12770440; doi:10.1038/s41598-025-29692-x)
Supplement: Supplementary file 6 — Supplementary Material 6 [file 41598_2025_29692_MOESM6_ESM.xlsx]

## Sheet: res_df
	baseMean	log2FoldChange	lfcSE	stat	pvalue	padj
0610005C13Rik	144.288	0.0838777	0.130988	0.640344	0.521949	0.999974
0610007N19Rik	388.051	-0.0476322	0.115319	-0.413048	0.679572	0.999974
0610007P14Rik	631.685	-0.0984191	0.0900148	-1.09337	0.274233	0.999974
0610009B22Rik	143.705	-0.160199	0.106152	-1.50914	0.131262	0.999974
0610009D07Rik	830.208	-0.00831903	0.0752439	-0.110561	0.911965	0.999974
0610009L18Rik	24.7382	0.100289	0.258903	0.387359	0.69849	0.999974
0610009O20Rik	632.593	-0.0476931	0.0761474	-0.626326	0.531101	0.999974
0610010F05Rik	294.43	-0.0153781	0.0858444	-0.179139	0.857828	0.999974
0610010K14Rik	333.994	0.0301205	0.0847113	0.355566	0.722166	0.999974
0610011F06Rik	506.1	-0.0362733	0.088313	-0.410735	0.681267	0.999974
0610012G03Rik	422.737	-0.0692148	0.100426	-0.689212	0.49069	0.999974
0610030E20Rik	447.721	-0.225381	0.141788	-1.58956	0.111933	0.999974
0610031J06Rik	1133.07	0.0213249	0.0813902	0.262009	0.793315	0.999974
0610037L13Rik	363.015	-0.0682681	0.118253	-0.577308	0.563732	0.999974
0610040J01Rik	900.79	0.0519891	0.133826	0.388484	0.697658	0.999974
1110001A16Rik	115.47	-0.0268391	0.151678	-0.176948	0.859549	0.999974
1110001J03Rik	263.689	0.0198456	0.103882	0.191039	0.848495	0.999974
1110004E09Rik	227.773	-0.0608376	0.0885317	-0.687184	0.491967	0.999974
1110004F10Rik	959.844	-0.039836	0.0706892	-0.563537	0.573069	0.999974
1110007C09Rik	630.577	0.178337	0.106541	1.67388	0.0941539	0.999974
1110008F13Rik	469.839	0.00327425	0.0736978	0.0444281	0.964563	0.999974
1110008J03Rik	111.971	-0.0145455	0.159014	-0.0914727	0.927117	0.999974
1110008L16Rik	156.106	-0.139126	0.104376	-1.33294	0.182553	0.999974
1110008P14Rik	172.738	-0.0945074	0.149119	-0.633771	0.52623	0.999974
1110012L19Rik	133.761	-0.0389835	0.117532	-0.331685	0.740127	0.999974
1110018G07Rik	651.338	-0.0670923	0.080999	-0.828311	0.407495	0.999974
1110032A03Rik	211.241	0.0343217	0.0925397	0.370887	0.710722	0.999974
1110034G24Rik	46.7505	0.0468546	0.189285	0.247534	0.804495	0.999974
1110037F02Rik	809.495	0.0265956	0.0682495	0.389682	0.696772	0.999974
1110038B12Rik	1113.79	0.0998109	0.0833704	1.1972	0.23123	0.999974
1110038F14Rik	192.394	-0.0985561	0.170196	-0.579075	0.562539	0.999974
1110051M20Rik	134.543	0.0552607	0.180392	0.306336	0.759349	0.999974
1110054M08Rik	63.5743	0.0441243	0.189335	0.233049	0.815723	0.999974
1110057K04Rik	511.993	0.0441797	0.0868314	0.508798	0.610894	0.999974
1110058L19Rik	118.887	0.0519966	0.144284	0.360377	0.718565	0.999974
1110059E24Rik	662.861	0.0427803	0.104116	0.41089	0.681153	0.999974
1110059G10Rik	135.257	-0.160099	0.124739	-1.28348	0.199326	0.999974
1110065P20Rik	98.976	0.0550167	0.152222	0.361423	0.717783	0.999974
1190002F15Rik	55.0377	-0.0620394	0.170468	-0.363935	0.715907	0.999974
1190002N15Rik	806.284	0.135736	0.102738	1.32119	0.186438	0.999974
1190003J15Rik	68.4884	-0.0928317	0.181844	-0.510503	0.609699	0.999974
1190007I07Rik	82.2923	-0.222741	0.157034	-1.41842	0.156067	0.999974
1200011I18Rik	481.952	-0.164232	0.0883603	-1.85866	0.0630751	0.999974
1200014J11Rik	543.017	0.00309873	0.0783911	0.0395291	0.968469	0.999974
1300002E11Rik	121.803	-0.130006	0.153	-0.849712	0.395485	0.999974
1300002K09Rik	424.558	-0.0773562	0.218314	-0.354334	0.723089	0.999974
1300018J18Rik	221.853	0.0228086	0.0911161	0.250325	0.802336	0.999974
1500009L16Rik	120.544	0.0360352	0.146008	0.246803	0.80506	0.999974
1500011B03Rik	112.582	-0.0615211	0.205982	-0.298672	0.76519	0.999974
1500011K16Rik	193.859	-0.146039	0.141838	-1.02962	0.303189	0.999974
1500012F01Rik	744.926	0.11173	0.106914	1.04504	0.296005	0.999974
1500015A07Rik	31.8922	0.102833	0.23346	0.440472	0.659595	0.999974
1500032L24Rik	987.071	0.0177651	0.0911102	0.194984	0.845405	0.999974
1600002H07Rik	63.4396	-0.303805	0.200105	-1.51823	0.128957	0.999974
1600002K03Rik	74.2221	-0.024966	0.171935	-0.145206	0.884548	0.999974
1600012H06Rik	389.824	-0.152007	0.103017	-1.47554	0.140066	0.999974
1600014C10Rik	161.538	-0.0273368	0.146893	-0.186101	0.852366	0.999974
1600016N20Rik	71.5971	-0.224966	0.269291	-0.835398	0.403493	0.999974
1600020E01Rik	92.952	0.0997407	0.119417	0.835228	0.40359	0.999974
1600029D21Rik	798.981	-0.0604095	0.199958	-0.302111	0.762567	0.999974
1700001L05Rik	148.951	-0.186544	0.115217	-1.61907	0.105432	0.999974
1700001O22Rik	33.6308	0.167148	0.217551	0.768315	0.4423	0.999974
1700008J07Rik	50.6421	0.219618	0.204387	1.07452	0.282591	0.999974
1700010I14Rik	37.3864	-0.161192	0.192578	-0.83702	0.402581	0.999974
1700011H14Rik	261.821	-0.0296744	0.31691	-0.0936368	0.925398	0.999974
1700011J10Rik	45.501	-0.154798	0.177419	-0.8725	0.382936	0.999974
1700012B15Rik	86.6087	0.008405	0.163682	0.0513495	0.959047	0.999974
1700017B05Rik	1084.13	0.216324	0.111529	1.93962	0.0524255	0.999974
1700019D03Rik	47.1207	-0.140752	0.212627	-0.661966	0.507993	0.999974
1700019G17Rik	76.5504	0.294384	0.216892	1.35728	0.174691	0.999974
1700019L03Rik	36.698	-0.201474	0.286185	-0.704	0.481433	0.999974
1700020I14Rik	498.083	-0.0856859	0.107504	-0.797048	0.425423	0.999974
1700020L24Rik	181.186	-0.0137413	0.134098	-0.102472	0.918382	0.999974
1700021F05Rik	277.375	-0.116324	0.0920394	-1.26385	0.206284	0.999974
1700021K19Rik	716.789	0.039306	0.0922026	0.426301	0.669889	0.999974
1700024P16Rik	46.5905	0.279093	0.246948	1.13017	0.258406	0.999974
1700025G04Rik	865.734	-0.00968216	0.113763	-0.0851081	0.932175	0.999974
1700030A11Rik	25.1291	-1.04799	0.410519	-2.55285	0.0106844	0.999974
1700030C10Rik	24.818	-0.165547	0.301951	-0.548259	0.583514	0.999974
1700030K09Rik	48.4897	-0.0230397	0.234795	-0.0981268	0.921832	0.999974
1700037C18Rik	31.4573	-0.0251299	0.266587	-0.0942653	0.924898	0.999974
1700037H04Rik	375.64	0.0224112	0.155027	0.144563	0.885056	0.999974
1700040L02Rik	75.1014	-0.017583	0.157724	-0.11148	0.911236	0.999974
1700049G17Rik	53.6261	-0.255544	0.277863	-0.919679	0.357741	0.999974
1700052K11Rik	36.9379	-0.209685	0.298915	-0.701486	0.483	0.999974
1700052N19Rik	139.45	-0.105725	0.12386	-0.85358	0.393338	0.999974
1700066B19Rik	150.371	-0.504904	0.126004	-4.00704	6.14842e-05	0.584992
1700066J24Rik	49.56	-0.0465204	0.217416	-0.21397	0.83057	0.999974
1700066M21Rik	88.5171	-0.135805	0.167446	-0.811035	0.417346	0.999974
1700094D03Rik	63.759	0.424238	0.156788	2.70581	0.00681373	0.999974
1700096K18Rik	34.5844	-0.0906888	0.214009	-0.423762	0.67174	0.999974
1700113A16Rik	274.164	0.19909	0.103862	1.91688	0.0552537	0.999974
1700123O20Rik	421.544	-0.0201703	0.117658	-0.171432	0.863884	0.999974
1810007I06Rik	37.8026	-0.0251013	0.270881	-0.0926656	0.926169	0.999974
1810009A15Rik	225.567	-0.087122	0.119947	-0.726336	0.467633	0.999974
1810010D01Rik	29.9649	-0.0124353	0.284102	-0.0437707	0.965087	0.999974
1810010H24Rik	32.313	0.393092	0.221605	1.77384	0.0760891	0.999974
1810011O10Rik	3105.43	-0.38734	0.159889	-2.42256	0.0154116	0.999974
1810013D10Rik	333.162	-0.0473485	0.124974	-0.378866	0.704787	0.999974
1810013L24Rik	1314.96	0.164121	0.0890944	1.8421	0.065461	0.999974
1810014B01Rik	32.3274	-0.028182	0.244385	-0.115318	0.908193	0.999974
1810019D21Rik	167.248	-0.262575	0.242869	-1.08114	0.279636	0.999974
1810019J16Rik	383.201	0.00581423	0.0996539	0.0583443	0.953474	0.999974
1810022K09Rik	232.688	-0.0803751	0.102922	-0.78093	0.434843	0.999974
1810026B05Rik	736.424	-0.125553	0.0789429	-1.59042	0.11174	0.999974
1810026J23Rik	622.373	-0.0339635	0.0669211	-0.507516	0.611793	0.999974
1810030O07Rik	360	0.000188274	0.101611	0.00185289	0.998522	0.999974
1810032O08Rik	252.058	-0.0352358	0.107773	-0.326946	0.743709	0.999974
1810034E14Rik	52.2839	0.0150511	0.173023	0.0869889	0.93068	0.999974
1810037I17Rik	1049.4	0.0491132	0.0946032	0.519149	0.603657	0.999974
1810041L15Rik	385.217	0.00518582	0.227934	0.0227514	0.981849	0.999974
1810043G02Rik	140.508	0.173494	0.122348	1.41803	0.156181	0.999974
1810043H04Rik	200.954	-0.0721143	0.135765	-0.53117	0.595301	0.999974
1810055G02Rik	955.849	0.0216231	0.0886421	0.243938	0.807279	0.999974
1810058I24Rik	455.256	0.0223741	0.117078	0.191104	0.848444	0.999974
1810065E05Rik	20560	0.0335331	0.193526	0.173275	0.862435	0.999974
2010001M06Rik	464.859	-0.0639771	0.13697	-0.467088	0.640437	0.999974
2010002M12Rik	168.676	0.409316	0.257631	1.58877	0.112113	0.999974
2010003K11Rik	171.816	0.0484454	0.224511	0.215782	0.829158	0.999974
2010003O02Rik	25.5874	0.0333488	0.226198	0.147432	0.882791	0.999974
2010012O05Rik	181.082	-0.0562711	0.131912	-0.426582	0.669684	0.999974
2010107E04Rik	1642.94	-0.0396572	0.079474	-0.498995	0.617783	0.999974
2010107G12Rik	80.1925	0.151984	0.304749	0.498719	0.617977	0.999974
2010107G23Rik	158.53	-0.0766358	0.162312	-0.472151	0.636819	0.999974
2010109I03Rik	1552.16	-0.735349	0.796783	-0.922897	0.356061	0.999974
2010111I01Rik	413.743	0.0142606	0.0924941	0.154179	0.877469	0.999974
2010204K13Rik	26.7722	-0.171174	0.264594	-0.646929	0.517678	0.999974
2010300C02Rik	681.367	0.0159499	0.110082	0.144891	0.884797	0.999974
2010315B03Rik	179.461	-0.109647	0.140618	-0.779748	0.435539	0.999974
2010320M18Rik	68.2992	0.147855	0.166276	0.889213	0.373889	0.999974
2200002D01Rik	2188.97	0.0323063	0.0990671	0.326106	0.744344	0.999974
2210013O21Rik	259.41	-0.0886062	0.106825	-0.82945	0.40685	0.999974
2210015D19Rik	89.2078	-0.00779515	0.176661	-0.0441249	0.964805	0.999974
2210016F16Rik	644.105	-0.0499577	0.0944073	-0.529172	0.596686	0.999974
2210016L21Rik	354.151	-0.0534455	0.132015	-0.404843	0.685593	0.999974
2210018M11Rik	458.339	0.220604	0.12962	1.70193	0.088769	0.999974
2210404J11Rik	83.1316	-0.122905	0.149395	-0.822686	0.410686	0.999974
2210404O07Rik	840.874	0.0550319	0.156338	0.352005	0.724834	0.999974
2210404O09Rik	62.9004	0.107063	0.183924	0.582104	0.560497	0.999974
2210407C18Rik	384.037	-0.268414	0.26753	-1.0033	0.315714	0.999974
2210408I21Rik	76.3575	-0.177416	0.154831	-1.14587	0.251851	0.999974
2300009A05Rik	102.056	-0.0140419	0.177902	-0.0789307	0.937088	0.999974
2310001H17Rik	26.4813	-0.027269	0.290994	-0.0937101	0.925339	0.999974
2310003H01Rik	402.82	-0.0351125	0.0736163	-0.476967	0.633386	0.999974
2310007B03Rik	191.556	-0.0285183	0.146689	-0.194413	0.845852	0.999974
2310008H04Rik	316.22	-0.0591257	0.0912896	-0.647672	0.517197	0.999974
2310008H09Rik	630.107	-0.122684	0.0746667	-1.64309	0.100363	0.999974
2310009A05Rik	101.691	-0.0597002	0.138956	-0.429633	0.667462	0.999974
2310009B15Rik	81.6866	-0.0328333	0.15889	-0.206642	0.836289	0.999974
2310010J17Rik	38.1535	0.111308	0.211927	0.525218	0.599431	0.999974
2310011J03Rik	386.58	0.0113922	0.128629	0.0885667	0.929426	0.999974
2310014L17Rik	23.5471	0.766994	0.383408	2.00047	0.0454501	0.999974
2310015A10Rik	135.843	-0.0836032	0.17167	-0.487	0.626258	0.999974
2310022A10Rik	261.784	-0.10164	0.0853432	-1.19096	0.233671	0.999974
2310022B05Rik	2343.95	0.034451	0.079853	0.43143	0.666156	0.999974
2310030G06Rik	141.867	-0.0398021	0.130218	-0.305657	0.759866	0.999974
2310033P09Rik	186.929	0.160749	0.134467	1.19545	0.23191	0.999974
2310035C23Rik	1187.48	0.087118	0.137421	0.633951	0.526112	0.999974
2310036O22Rik	1449.12	0.0490071	0.0628068	0.780282	0.435225	0.999974
2310039H08Rik	253.416	-0.0305162	0.101099	-0.301844	0.762771	0.999974
2310042D19Rik	25.7444	-0.00142731	0.248187	-0.00575094	0.995411	0.999974
2310044G17Rik	1070.84	0.0237819	0.105507	0.225406	0.821663	0.999974
2310045N01Rik	173.688	-0.124901	0.137063	-0.911271	0.362153	0.999974
2310047M10Rik	473.75	0.166658	0.110632	1.50642	0.131959	0.999974
2310057M21Rik	146.062	0.0907372	0.129102	0.702834	0.482159	0.999974
2310061I04Rik	529.352	-0.139973	0.0858251	-1.63091	0.102909	0.999974
2310067B10Rik	1391.75	-0.0132566	0.0777323	-0.170542	0.864584	0.999974
2410002F23Rik	667.929	-0.0845385	0.116214	-0.727436	0.466959	0.999974
2410004B18Rik	250.464	0.211617	0.0916287	2.30951	0.0209154	0.999974
2410004N09Rik	304.78	-0.063977	0.0914972	-0.699223	0.484413	0.999974
2410006H16Rik	822.814	0.0513928	0.0907326	0.56642	0.571108	0.999974
2410015M20Rik	881.382	-0.0419525	0.0689927	-0.608071	0.54314	0.999974
2410016O06Rik	210.233	-0.138334	0.131601	-1.05116	0.293184	0.999974
2410066E13Rik	71.4347	-0.11659	0.233063	-0.50025	0.616899	0.999974
2410089E03Rik	246.861	0.120331	0.14589	0.824801	0.409485	0.999974
2410127L17Rik	59.274	0.0487083	0.177265	0.274778	0.783487	0.999974
2410131K14Rik	192.907	0.075461	0.113218	0.666511	0.505085	0.999974
2500004C02Rik	38.582	0.0719004	0.199598	0.360226	0.718678	0.999974
2510002D24Rik	286.241	-0.150132	0.108867	-1.37904	0.167882	0.999974
2510003E04Rik	373.406	-0.0641747	0.109674	-0.585141	0.558453	0.999974
2510009E07Rik	676.787	-0.0611596	0.118594	-0.515705	0.606061	0.999974
2510039O18Rik	1476.94	-0.0559975	0.063286	-0.884833	0.376247	0.999974
2510049J12Rik	555.541	-0.0131435	0.103592	-0.126877	0.899038	0.999974
2610001J05Rik	434.508	-0.0535102	0.105114	-0.509069	0.610704	0.999974
2610002J02Rik	262.763	-0.0517101	0.149876	-0.34502	0.730079	0.999974
2610002M06Rik	533.015	-0.0657265	0.0844083	-0.778673	0.436172	0.999974
2610005L07Rik	58.0922	-0.372135	0.186346	-1.99701	0.0458239	0.999974
2610008E11Rik	168.157	-0.205683	0.199752	-1.02969	0.303157	0.999974
2610015P09Rik	68.5817	0.191074	0.169077	1.1301	0.258435	0.999974
2610018G03Rik	102.955	0.0837501	0.262806	0.318676	0.749972	0.999974
2610019E17Rik	35.5476	0.189871	0.191579	0.991087	0.321643	0.999974
2610019F03Rik	85.8484	0.551866	0.201037	2.7451	0.00604932	0.999974
2610020C07Rik	24.8964	-0.212881	0.337168	-0.631379	0.527793	0.999974
2610020H08Rik	66.5366	-0.136209	0.170469	-0.799023	0.424277	0.999974
2610034B18Rik	884.204	-0.104893	0.119288	-0.879328	0.379224	0.999974
2610035D17Rik	429.826	0.391457	0.188016	2.08204	0.0373388	0.999974
2610044O15Rik8	44.9361	-0.085765	0.22986	-0.373118	0.70906	0.999974
2610203C20Rik	330.565	-0.25478	0.298662	-0.853071	0.39362	0.999974
2610301B20Rik	182.792	0.000561265	0.0918884	0.00610811	0.995126	0.999974
2610301G19Rik	811.736	-0.107075	0.068608	-1.56068	0.1186	0.999974
2610305D13Rik	29.3146	0.053631	0.278301	0.192708	0.847187	0.999974
2610306M01Rik	30.8987	-0.182717	0.251454	-0.726641	0.467446	0.999974
2610307P16Rik	35.8157	-0.295683	0.240422	-1.22985	0.218753	0.999974
2610318N02Rik	30.421	-0.160074	0.233098	-0.686724	0.492257	0.999974
2610507B11Rik	4134.27	-0.0295332	0.0748393	-0.394621	0.693123	0.999974
2610507I01Rik	94.7838	-0.0495652	0.227042	-0.218308	0.827189	0.999974
2610524H06Rik	66.4316	0.125151	0.187257	0.66834	0.503917	0.999974
2610528A11Rik	10564.1	-0.0219833	0.100271	-0.219238	0.826465	0.999974
2610528J11Rik	525.956	-0.151475	0.11131	-1.36084	0.173565	0.999974
2700029M09Rik	346.688	0.00734439	0.101877	0.0720907	0.94253	0.999974
2700049A03Rik	135.139	0.0697899	0.110396	0.632179	0.52727	0.999974
2700050L05Rik	436.331	0.302559	0.125249	2.41565	0.0157072	0.999974
2700060E02Rik	1403.13	-0.0120775	0.0733994	-0.164545	0.869302	0.999974
2700062C07Rik	99.4035	-0.078078	0.160126	-0.487602	0.625831	0.999974
2700081O15Rik	756.719	0.225188	0.0738876	3.04771	0.00230589	0.999974
2700086A05Rik	64.4496	-0.0208507	0.193626	-0.107686	0.914245	0.999974
2700089E24Rik	1162.96	-0.0410977	0.0821411	-0.50033	0.616842	0.999974
2700094K13Rik	294.879	0.00215401	0.102978	0.0209171	0.983312	0.999974
2700097O09Rik	65.4248	-0.100154	0.169681	-0.590249	0.555024	0.999974
2700099C18Rik	54.6697	0.0657443	0.202064	0.325364	0.744905	0.999974
2810001G20Rik	59.1098	-0.1932	0.18267	-1.05764	0.290218	0.999974
2810002D19Rik	54.3157	-0.22865	0.181208	-1.26181	0.207017	0.999974
2810004N23Rik	255.355	-0.145836	0.0987135	-1.47736	0.139578	0.999974
2810006K23Rik	64.2039	-0.0848893	0.150667	-0.563422	0.573147	0.999974
2810008D09Rik	59.295	-0.352519	0.328051	-1.07458	0.282561	0.999974
2810013P06Rik	95.9761	0.0372724	0.179681	0.207437	0.835669	0.999974
2810021J22Rik	40.0555	-0.302532	0.254268	-1.18981	0.23412	0.999974
2810025M15Rik	132.745	-0.091003	0.124852	-0.728885	0.466072	0.999974
2810403A07Rik	1659.49	0.32113	0.159692	2.01093	0.0443325	0.999974
2810407C02Rik	2504.18	0.00187263	0.0573214	0.0326689	0.973939	0.999974
2810408A11Rik	75.9298	-0.00379474	0.182326	-0.0208129	0.983395	0.999974
2810408M09Rik	144.785	-0.198315	0.126122	-1.57241	0.115856	0.999974
2810410L24Rik	41.1563	-0.102179	0.287669	-0.355196	0.722443	0.999974
2810417H13Rik	582.943	-0.119097	0.143174	-0.831832	0.405504	0.999974
2810428I15Rik	383.125	0.0414362	0.106202	0.390164	0.696415	0.999974
2810459M11Rik	176.925	0.0917304	0.188121	0.487614	0.625823	0.999974
2810474O19Rik	503.103	0.142112	0.122979	1.15558	0.247854	0.999974
2900011O08Rik	32.4904	0.293015	0.404599	0.724212	0.468936	0.999974
2900026A02Rik	1645.68	0.107916	0.11645	0.92671	0.354077	0.999974
2900056M20Rik	54.2712	-0.215728	0.224886	-0.959278	0.337419	0.999974
2900076A07Rik	29.8904	-0.3602	0.25311	-1.4231	0.154707	0.999974
2900097C17Rik	841.834	-0.109635	0.129264	-0.84815	0.396354	0.999974
3010026O09Rik	35.9061	-0.00015919	0.213817	-0.000744518	0.999406	0.999974
3110001D03Rik	280.56	-0.0755065	0.11564	-0.652944	0.513792	0.999974
3110001I22Rik	52.4706	0.367829	0.20758	1.77199	0.0763966	0.999974
3110002H16Rik	516.509	0.1245	0.0911691	1.36559	0.172067	0.999974
3110021N24Rik	28.7824	0.0369804	0.280179	0.131988	0.894993	0.999974
3110040N11Rik	145.034	-0.176029	0.116809	-1.50698	0.131817	0.999974
3110043O21Rik	422.633	0.125916	0.119239	1.056	0.290968	0.999974
3110052M02Rik	63.5608	-0.12315	0.165976	-0.741976	0.458102	0.999974
3110056K07Rik	36.6608	-0.104134	0.223518	-0.465888	0.641295	0.999974
3110057O12Rik	70.0901	-0.138592	0.160346	-0.864328	0.387408	0.999974
3110062M04Rik	28.6073	0.166939	0.228164	0.731663	0.464374	0.999974
3110082I17Rik	122.585	-0.0857202	0.13291	-0.644948	0.518961	0.999974
3230401D17Rik	117.876	0.276699	0.178955	1.5462	0.122057	0.999974
3632451O06Rik	210.376	0.0688402	0.128195	0.536995	0.591271	0.999974
3830403N18Rik	45.406	0.101955	0.224026	0.455104	0.649035	0.999974
3830406C13Rik	323.802	-0.162536	0.0936906	-1.73482	0.0827726	0.999974
4632415K11Rik	152.312	-0.113703	0.173453	-0.655527	0.512129	0.999974
4632415L05Rik	141.509	-0.28666	0.192702	-1.48758	0.136861	0.999974
4632428C04Rik	34.0343	-0.309929	0.253424	-1.22297	0.221342	0.999974
4632428N05Rik	324.227	0.111481	0.116313	0.958462	0.33783	0.999974
4632434I11Rik	54.1294	-0.11699	0.180051	-0.649758	0.515849	0.999974
4833412C05Rik	45.5013	-0.0417151	0.234051	-0.178231	0.858542	0.999974
4833420G17Rik	416.157	0.0873188	0.091834	0.950833	0.341689	0.999974
4833424O15Rik	175.275	0.102055	0.212067	0.481242	0.630345	0.999974
4833439L19Rik	2601.08	0.0301258	0.0560196	0.537772	0.590735	0.999974
4921524J17Rik	372.423	0.328829	0.131017	2.50981	0.0120795	0.999974
4921531C22Rik	25.3448	-0.10399	0.255631	-0.406796	0.684157	0.999974
4921536K21Rik	38.3789	0.136868	0.231795	0.590471	0.554875	0.999974
4922501C03Rik	115.497	-0.0025493	0.131328	-0.0194118	0.984513	0.999974
4930402H24Rik	970.92	0.00602946	0.110733	0.0544507	0.956576	0.999974
4930404N11Rik	90.8699	0.116438	0.253503	0.459317	0.646006	0.999974
4930413G21Rik	166.276	0.219154	0.16765	1.30721	0.191141	0.999974
4930414L22Rik	61.8551	-0.617483	0.226548	-2.72561	0.00641822	0.999974
4930422G04Rik	80.6362	-0.00603834	0.222068	-0.0271913	0.978307	0.999974
4930427A07Rik	182.922	-0.0836676	0.115264	-0.725875	0.467915	0.999974
4930430F08Rik	37.7146	-0.133208	0.230061	-0.579012	0.562581	0.999974
4930444A02Rik	129.891	-0.185804	0.151044	-1.23013	0.218647	0.999974
4930452B06Rik	49.7885	-0.0415507	0.187935	-0.221091	0.825021	0.999974
4930453N24Rik	273.486	-0.120001	0.0879734	-1.36406	0.172548	0.999974
4930455F23Rik	85.51	0.0954386	0.13626	0.700418	0.483666	0.999974
4930481A15Rik	43.5865	-0.227841	0.206974	-1.10082	0.270976	0.999974
4930483K19Rik	38.9866	0.0744342	0.183646	0.405313	0.685248	0.999974
4930503L19Rik	160.552	0.0895233	0.115715	0.773655	0.439135	0.999974
4930506M07Rik	703.827	-0.015351	0.0941139	-0.16311	0.870432	0.999974
4930523C07Rik	452.566	0.0316236	0.158454	0.199575	0.841813	0.999974
4930526I15Rik	206.044	0.0793664	0.162469	0.4885	0.625195	0.999974
4930539E08Rik	1477.61	-0.172116	0.15827	-1.08748	0.276825	0.999974
4930539J05Rik	66.5438	0.129748	0.175851	0.737829	0.460619	0.999974
4930577N17Rik	30.7798	0.0402581	0.200991	0.200298	0.841247	0.999974
4930579G18Rik	38.603	-0.508802	0.287801	-1.76789	0.077079	0.999974
4930579G24Rik	81.8347	0.257771	0.165511	1.55743	0.119369	0.999974
4931406C07Rik	2329.37	0.0739695	0.184682	0.400524	0.688771	0.999974
4931406P16Rik	1007.68	0.0942134	0.105583	0.892314	0.372225	0.999974
4931414P19Rik	58.7806	-0.239083	0.192674	-1.24087	0.214653	0.999974
4931428F04Rik	58.9194	-0.0834273	0.170023	-0.490682	0.623652	0.999974
4932415G12Rik	106.417	-0.0282165	0.150878	-0.187015	0.851649	0.999974
4932416H05Rik	29.1861	-0.35697	0.304584	-1.17199	0.2412	0.999974
4932438A13Rik	1340.14	0.143995	0.177685	0.810393	0.417714	0.999974
4933404O12Rik	52.3153	-0.0662781	0.220835	-0.300125	0.764082	0.999974
4933406C10Rik	28.9752	-0.0458477	0.315677	-0.145236	0.884525	0.999974
4933407K13Rik	43.4198	-0.386218	0.252564	-1.52919	0.126217	0.999974
4933411K20Rik	154.78	-0.139084	0.149574	-0.929869	0.352439	0.999974
4933412E12Rik	48.046	-0.242141	0.216563	-1.11811	0.263521	0.999974
4933413J09Rik	37.1447	0.938936	0.425708	2.20559	0.027413	0.999974
4933421O10Rik	58.375	0.159701	0.172648	0.925009	0.354961	0.999974
4933426M11Rik	4057.43	0.0391311	0.0909359	0.430316	0.666966	0.999974
4933427D14Rik	189.47	-0.0284901	0.107797	-0.264294	0.791553	0.999974
4933431E20Rik	375.526	-0.225377	0.16972	-1.32794	0.184199	0.999974
4933434E20Rik	395.592	-0.123302	0.0804043	-1.53352	0.125147	0.999974
4933439C10Rik	78.9198	-0.512135	0.262766	-1.94901	0.051294	0.999974
5031425E22Rik	82.8214	0.307038	0.150857	2.03529	0.0418216	0.999974
5031439G07Rik	1007.44	0.145658	0.0719211	2.02525	0.0428416	0.999974
5033404E19Rik	255.125	0.170466	0.107595	1.58432	0.113121	0.999974
5033406O09Rik	61.3094	-0.0970855	0.176585	-0.549793	0.582461	0.999974
5033411D12Rik	46.4622	0.142304	0.199263	0.714152	0.475133	0.999974
5330417C22Rik	2946.4	-0.0505436	0.149284	-0.338574	0.734931	0.999974
5330426P16Rik	54.8559	0.00301087	0.186426	0.0161505	0.987114	0.999974
5430416N02Rik	157.443	0.215024	0.12593	1.70749	0.0877315	0.999974
5430417L22Rik	1088.11	-0.343367	0.193545	-1.77409	0.0760476	0.999974
5430435G22Rik	212.732	0.245916	0.172417	1.42629	0.153785	0.999974
5530601H04Rik	51.4138	-0.26621	0.17303	-1.53852	0.123922	0.999974
5730409E04Rik	128.131	0.0455524	0.232734	0.195727	0.844824	0.999974
5730455P16Rik	254.2	-0.200116	0.141306	-1.41619	0.15672	0.999974
5730507C01Rik	27.9356	0.141708	0.300296	0.471896	0.637001	0.999974
5730508B09Rik	288.433	-0.138397	0.0934995	-1.48019	0.138822	0.999974
5730559C18Rik	1766.63	0.0614819	0.0941843	0.652783	0.513896	0.999974
5830415F09Rik	43.7794	0.0626545	0.192058	0.326227	0.744253	0.999974
5830417I10Rik	197.461	-0.171525	0.0999566	-1.71599	0.0861634	0.999974
5830418K08Rik	287.782	-0.188058	0.108338	-1.73585	0.0825909	0.999974
5930403L14Rik	45.0354	-0.253467	0.314295	-0.806463	0.419976	0.999974
6030419C18Rik	205.67	-0.0546842	0.181744	-0.300886	0.763501	0.999974
6030458C11Rik	360.49	-0.16466	0.095929	-1.71647	0.0860752	0.999974
6330403A02Rik	1558.95	-0.161412	0.226097	-0.713906	0.475285	0.999974
6330403K07Rik	196.301	0.0775742	0.253784	0.305671	0.759855	0.999974
6330403M23Rik	162.575	-0.0621534	0.162209	-0.383168	0.701595	0.999974
6330408A02Rik	72.9057	-0.0263004	0.141175	-0.186296	0.852213	0.999974
6330416G13Rik	403.713	-0.0632331	0.128348	-0.492668	0.622247	0.999974
6430548M08Rik	1207.27	0.00758748	0.14443	0.052534	0.958103	0.999974
6530402F18Rik	39.4667	0.103616	0.202579	0.511484	0.609012	0.999974
6720401G13Rik	1200.93	-0.37612	0.185978	-2.02238	0.0431369	0.999974
6720456H20Rik	270.19	-0.0654273	0.108318	-0.604032	0.545822	0.999974
6820431F20Rik	43.9677	0.0127467	0.238666	0.0534083	0.957407	0.999974
8030462N17Rik	412.618	0.0547762	0.102506	0.534371	0.593085	0.999974
8430408G22Rik	1143.55	-0.502653	0.18308	-2.74554	0.00604108	0.999974
8430410A17Rik	331.395	0.145332	0.0974655	1.49112	0.135931	0.999974
8430419L09Rik	124.578	-0.153606	0.144565	-1.06254	0.287992	0.999974
8430427H17Rik	1958.14	0.147638	0.102535	1.43988	0.149902	0.999974
8430429K09Rik	38.15	-0.163025	0.181381	-0.898798	0.36876	0.999974
9030617O03Rik	273.114	-0.101432	0.110302	-0.919582	0.357791	0.999974
9030624J02Rik	666.486	-0.0200706	0.0809933	-0.247806	0.804285	0.999974
9130008F23Rik	297.372	0.358683	0.174962	2.05006	0.0403583	0.999974
9130011E15Rik	328.774	0.0290679	0.102281	0.284196	0.776261	0.999974
9130017N09Rik	4091.24	0.00929863	0.122077	0.07617	0.939284	0.999974
9130019O22Rik	54.2085	0.187821	0.162069	1.1589	0.246498	0.999974
9130023H24Rik	44.1837	-0.346808	0.278416	-1.24565	0.212894	0.999974
9130024F11Rik	168.263	-0.0244311	0.132706	-0.184099	0.853936	0.999974
9130206I24Rik	538.136	-0.0719588	0.112506	-0.639601	0.522432	0.999974
9130221H12Rik	58.935	-0.0963427	0.205004	-0.469956	0.638387	0.999974
9130401M01Rik	250.565	-0.00370643	0.0912864	-0.0406022	0.967613	0.999974
9230105E05Rik	104.504	-0.0621651	0.208468	-0.298199	0.765551	0.999974
9230110C19Rik	31.0598	-0.121869	0.201804	-0.6039	0.54591	0.999974
9330133O14Rik	85.7883	-0.206171	0.146757	-1.40484	0.160069	0.999974
9330151L19Rik	34.1011	-0.191381	0.329294	-0.581185	0.561116	0.999974
9330159F19Rik	61.0597	0.0612812	0.302864	0.202339	0.839652	0.999974
9330182L06Rik	131.412	-0.0875872	0.251019	-0.348926	0.727145	0.999974
9430008C03Rik	295.612	-0.135044	0.129149	-1.04564	0.295725	0.999974
9430015G10Rik	133.352	-0.0963798	0.182658	-0.527651	0.597741	0.999974
9430016H08Rik	270.909	-0.111608	0.102724	-1.08649	0.277264	0.999974
9430020K01Rik	1025.15	-0.0929467	0.150057	-0.61941	0.535646	0.999974
9430023L20Rik	456.997	0.153989	0.147761	1.04215	0.297343	0.999974
9430038I01Rik	120.126	0.0134628	0.154559	0.0871045	0.930588	0.999974
9430091E24Rik	28.5118	-0.272488	0.269989	-1.00926	0.312852	0.999974
9530068E07Rik	4560.49	-0.0381128	0.0728199	-0.523385	0.600706	0.999974
9530082P21Rik	336.437	-0.180394	0.159009	-1.13449	0.256588	0.999974
9630028B13Rik	45.8799	0.570466	0.297897	1.91498	0.0554956	0.999974
9630033F20Rik	268.455	-0.000652363	0.110245	-0.0059174	0.995279	0.999974
9830001H06Rik	1955.86	0.281166	0.166672	1.68694	0.0916146	0.999974
9830147E19Rik	48.4537	-0.124563	0.196281	-0.634616	0.525679	0.999974
9930012K11Rik	26.4343	0.0341673	0.338767	0.100858	0.919663	0.999974
9930013L23Rik	468.174	0.0468507	0.515021	0.0909685	0.927518	0.999974
9930014A18Rik	63.9792	-0.191287	0.21756	-0.879238	0.379272	0.999974
9930021J03Rik	873.497	0.210061	0.1509	1.39205	0.163907	0.999974
9930104L06Rik	180.878	-0.23336	0.131851	-1.76987	0.0767485	0.999974
A030009H04Rik	45.4272	0.141501	0.178398	0.793173	0.427677	0.999974
A130010J15Rik	130.69	0.00712861	0.130418	0.0546597	0.95641	0.999974
A1cf	351.897	-0.0115785	0.149891	-0.0772462	0.938428	0.999974
A230046K03Rik	638.473	-0.0413501	0.0869897	-0.475344	0.634542	0.999974
A230050P20Rik	130.46	-0.27346	0.178512	-1.53188	0.125551	0.999974
A330021E22Rik	50.7688	0.276144	0.215505	1.28138	0.20006	0.999974
A330035P11Rik	38.0673	-0.0200954	0.246768	-0.0814342	0.935097	0.999974
A3galt2	34.5728	0.970393	0.411832	2.35628	0.0184589	0.999974
A430005L14Rik	225.677	-0.175813	0.139866	-1.25701	0.208751	0.999974
A430033K04Rik	74.0121	-0.396515	0.222622	-1.78111	0.0748942	0.999974
A430105I19Rik	390.684	-0.103301	0.155345	-0.664977	0.506065	0.999974
A4galt	646.795	-0.412447	0.163114	-2.52858	0.0114524	0.999974
A4gnt	138.869	-0.109671	0.237396	-0.461975	0.644099	0.999974
A530054K11Rik	102.026	-0.315764	0.168973	-1.86873	0.061661	0.999974
A630007B06Rik	458.624	0.209623	0.190143	1.10245	0.270268	0.999974
A630072M18Rik	42.1834	-0.166226	0.242294	-0.686052	0.492681	0.999974
A730017C20Rik	107.257	0.0379226	0.310375	0.122183	0.902754	0.999974
A730017L22Rik	77.7892	-0.217701	0.203693	-1.06877	0.285172	0.999974
A830010M20Rik	169.102	0.0189715	0.204349	0.0928388	0.926032	0.999974
A830080D01Rik	152.891	-0.0441127	0.125298	-0.352063	0.724791	0.999974
A930005H10Rik	40.8243	0.126081	0.215958	0.583824	0.559339	0.999974
A930015D03Rik	58.9764	0.317724	0.172694	1.83981	0.0657965	0.999974
AA414768	64.241	-0.0352256	0.268027	-0.131426	0.895439	0.999974
AA415398	28.9386	0.132953	0.211468	0.628715	0.529536	0.999974
AA467197	1737.4	0.00819119	0.180994	0.0452567	0.963903	0.999974
AA986860	640.141	0.476175	0.174089	2.73523	0.00623359	0.999974
AA987161	118.258	-0.157844	0.124087	-1.27204	0.203358	0.999974
Aaas	240.282	-0.0563153	0.0994075	-0.56651	0.571047	0.999974
Aacs	1278.18	0.0271507	0.0924688	0.29362	0.769048	0.999974
Aadac	413.663	-0.144388	0.10991	-1.31369	0.18895	0.999974
Aaed1	261.948	0.0673492	0.0824152	0.817194	0.413818	0.999974
Aagab	634.667	-0.0454682	0.0866484	-0.524744	0.599761	0.999974
Aak1	1571.53	0.213461	0.146506	1.45702	0.145112	0.999974
Aamdc	373.223	0.0185188	0.155615	0.119004	0.905272	0.999974
Aamp	2269.84	0.075201	0.0710179	1.0589	0.289644	0.999974
Aar2	344.761	0.104668	0.110942	0.943452	0.34545	0.999974
Aard	59.8675	-0.170694	0.204576	-0.834378	0.404068	0.999974
Aars	2968.77	0.0786448	0.097127	0.80971	0.418107	0.999974
Aars2	238.673	-0.110897	0.10276	-1.07919	0.280502	0.999974
Aarsd1	347.211	-0.0149876	0.12422	-0.120653	0.903966	0.999974
Aasdh	73.7866	0.0176783	0.135126	0.130828	0.895911	0.999974
Aasdhppt	358.437	-0.112152	0.0868202	-1.29177	0.196437	0.999974
Aatf	346.728	-0.0711683	0.0901301	-0.789618	0.429751	0.999974
Aatk	293.701	-2.69815e-05	0.216284	-0.00012475	0.9999	0.999974
Abat	980.847	-0.00437594	0.127123	-0.0344229	0.97254	0.999974
Abca1	808.453	0.23438	0.189685	1.23562	0.216599	0.999974
Abca12	323.059	0.11221	0.525113	0.213686	0.830792	0.999974
Abca2	375.218	-0.0675333	0.148259	-0.455508	0.648744	0.999974
Abca3	930.035	0.0198707	0.0935338	0.212444	0.831761	0.999974
Abca5	220.711	0.0884736	0.123471	0.716554	0.473649	0.999974
Abca6	27.2596	0.0895537	0.242017	0.370031	0.711359	0.999974
Abca7	670.856	-0.000282245	0.0681796	-0.00413972	0.996697	0.999974
Abca8a	244.187	-0.0292081	0.139658	-0.209141	0.834338	0.999974
Abca8b	101.978	-0.00595316	0.148679	-0.0400405	0.968061	0.999974
Abca9	160.553	-0.0419294	0.157208	-0.266712	0.789691	0.999974
Abcb10	449.133	-0.0274676	0.0871155	-0.315301	0.752533	0.999974
Abcb1a	3584.28	0.211544	0.181201	1.16746	0.243026	0.999974
Abcb1b	87.4785	0.21233	0.188902	1.12402	0.261003	0.999974
Abcb6	598.826	0.0378885	0.113119	0.334944	0.737667	0.999974
Abcb7	724.817	0.0017416	0.0819638	0.0212484	0.983047	0.999974
Abcb8	613.228	-0.0697661	0.081125	-0.859983	0.389798	0.999974
Abcb9	98.8119	0.215949	0.123407	1.74989	0.0801368	0.999974
Abcc1	1029.6	-0.243424	0.129481	-1.88	0.0601082	0.999974
Abcc10	429.707	-0.20585	0.14258	-1.44375	0.148809	0.999974
Abcc2	31.1377	0.0231331	0.258714	0.0894157	0.928752	0.999974
Abcc3	1493.54	-0.168056	0.155335	-1.0819	0.279299	0.999974
Abcc4	277.649	-0.0875665	0.118283	-0.740311	0.459111	0.999974
Abcc5	501.859	0.0013809	0.11085	0.0124574	0.990061	0.999974
Abcc6	160.687	-0.015627	0.229993	-0.0679457	0.945829	0.999974
Abcc8	74.0215	-0.145539	0.185898	-0.782898	0.433687	0.999974
Abcc9	1217.81	-0.0371898	0.106462	-0.349325	0.726845	0.999974
Abcd1	364.797	-0.15908	0.0845293	-1.88195	0.0598433	0.999974
Abcd3	2202.83	0.00517382	0.0888989	0.0581989	0.95359	0.999974
Abcd4	189.251	-0.00609246	0.161617	-0.0376969	0.969929	0.999974
Abce1	2415.58	-0.0072773	0.0812034	-0.0896182	0.928591	0.999974
Abcf1	1905.65	0.00487743	0.0513137	0.0950512	0.924274	0.999974
Abcf2	1063.22	-0.0228934	0.0677751	-0.337785	0.735526	0.999974
Abcf3	622.284	-0.0245916	0.0652591	-0.376831	0.706299	0.999974
Abcg1	286.014	0.233394	0.163684	1.42588	0.153904	0.999974
Abcg2	1100.98	0.198131	0.120008	1.65098	0.098743	0.999974
Abcg4	75.2369	0.0912676	0.221634	0.411795	0.68049	0.999974
Abhd10	225.242	-0.00359823	0.102369	-0.0351495	0.971961	0.999974
Abhd11	691.753	-0.0529043	0.088844	-0.595474	0.551527	0.999974
Abhd12	637.482	0.10366	0.068385	1.51582	0.129564	0.999974
Abhd13	1068.15	-0.0239322	0.0744824	-0.321314	0.747972	0.999974
Abhd14a	261.529	-0.0086035	0.111956	-0.0768474	0.938745	0.999974
Abhd14b	749.772	-0.0703311	0.0852358	-0.825136	0.409294	0.999974
Abhd16a	1023.58	-0.0703459	0.0821133	-0.856693	0.391615	0.999974
Abhd2	3157.8	0.183314	0.129182	1.41904	0.155887	0.999974
Abhd3	45.0346	0.240075	0.276284	0.868943	0.384878	0.999974
Abhd4	1133.75	-0.0994145	0.083927	-1.18454	0.236201	0.999974
Abhd5	553.795	0.0552926	0.081788	0.676048	0.49901	0.999974
Abhd6	710.831	0.070992	0.105025	0.675952	0.499071	0.999974
Abhd8	492.029	0.0497771	0.116992	0.425475	0.67049	0.999974
Abi1	2801.17	0.0792468	0.111434	0.711157	0.476987	0.999974
Abi2	627.583	0.0899305	0.0946149	0.95049	0.341863	0.999974
Abi3	106.56	0.0310238	0.117728	0.263522	0.792148	0.999974
Abi3bp	1449.57	0.0579071	0.171887	0.336891	0.736199	0.999974
Abl1	2915.21	0.134131	0.0669572	2.00323	0.0451525	0.999974
Abl2	1613.99	0.372033	0.165745	2.24461	0.0247932	0.999974
Ablim1	1905.51	0.225006	0.185069	1.2158	0.224063	0.999974
Ablim2	412.32	-0.0140857	0.150284	-0.093727	0.925326	0.999974
Ablim3	166.651	-0.000367861	0.112109	-0.00328128	0.997382	0.999974
Abo	42.6618	-0.203981	0.317786	-0.641881	0.52095	0.999974
Abp1	1310.94	0.146084	0.160591	0.909661	0.363001	0.999974
Abr	2324.44	-0.0293515	0.075637	-0.388058	0.697973	0.999974
Abracl	696.213	0.018118	0.0688193	0.263269	0.792343	0.999974
Abt1	218.633	0.00607195	0.117815	0.0515378	0.958897	0.999974
Abtb1	214.336	0.0186333	0.138178	0.13485	0.89273	0.999974
Abtb2	569.082	0.343819	0.211385	1.62651	0.103842	0.999974
Acaa1a	927.58	0.00097658	0.0904291	0.0107994	0.991383	0.999974
Acaa1b	236.059	0.295938	0.359836	0.822424	0.410835	0.999974
Acaa2	2331.04	0.0504844	0.129942	0.388514	0.697636	0.999974
Acaca	554.174	0.0389986	0.0790117	0.49358	0.621603	0.999974
Acacb	416.234	0.1724	0.112326	1.53482	0.124827	0.999974
Acad10	164.742	0.060069	0.102185	0.587845	0.556636	0.999974
Acad11	830.246	0.0288083	0.130258	0.221164	0.824965	0.999974
Acad12	63.8448	0.0833422	0.16707	0.498846	0.617888	0.999974
Acad8	402.052	-0.00985603	0.0815165	-0.120908	0.903764	0.999974
Acad9	470.019	-0.157664	0.0803904	-1.96123	0.0498516	0.999974
Acadl	2913.35	0.0156612	0.0811961	0.192881	0.847052	0.999974
Acadm	1413.28	0.0491062	0.0855231	0.574187	0.565842	0.999974
Acads	3120.19	-0.00148887	0.0899228	-0.0165572	0.98679	0.999974
Acadsb	673.318	0.0153077	0.0638124	0.239887	0.810418	0.999974
Acadvl	2741.41	0.0207719	0.0804975	0.258044	0.796373	0.999974
Acap1	31.9394	0.118267	0.232633	0.508386	0.611183	0.999974
Acap2	1761.78	0.0894752	0.116617	0.767258	0.442928	0.999974
Acap3	554.913	0.0306058	0.100772	0.303713	0.761347	0.999974
Acat1	3849.56	-0.0211986	0.0601172	-0.352622	0.724372	0.999974
Acat2	487.352	-0.0501866	0.0955148	-0.525433	0.599282	0.999974
Acbd3	2101.6	0.164831	0.116726	1.41212	0.157915	0.999974
Acbd4	152.783	-0.127109	0.161235	-0.788344	0.430496	0.999974
Acbd5	886.392	0.0522883	0.0704406	0.742303	0.457904	0.999974
Acbd6	531.096	-0.0626997	0.0683055	-0.917931	0.358655	0.999974
Accs	47.5023	-0.0560058	0.216246	-0.258992	0.795642	0.999974
Acd	316.531	-0.0515759	0.0827447	-0.623314	0.533078	0.999974
Ace	610.05	-0.138295	0.110344	-1.25331	0.210093	0.999974
Ace2	987.666	0.250448	0.14051	1.78242	0.0746807	0.999974
Acer1	292.883	0.0197677	0.134671	0.146785	0.883302	0.999974
Acer2	189.909	0.0576986	0.145148	0.397517	0.690987	0.999974
Acer3	384.501	-0.031279	0.0841563	-0.371677	0.710133	0.999974
Ache	462.967	0.0266393	0.234209	0.113741	0.909443	0.999974
Acin1	2608.37	0.120858	0.0834959	1.44747	0.147764	0.999974
Acly	3921.1	0.0194619	0.086773	0.224286	0.822535	0.999974
Acn9	47.7291	0.0390968	0.207243	0.188652	0.850365	0.999974
Acnat1	385.762	-0.0904927	0.0896662	-1.00922	0.31287	0.999974
Aco1	1650.52	0.0141263	0.0749628	0.188445	0.850528	0.999974
Aco2	6451.93	-0.0156545	0.0628619	-0.24903	0.803337	0.999974
Acot1	183.77	0.109556	0.117436	0.932895	0.350874	0.999974
Acot11	426.899	-0.0991453	0.109255	-0.907471	0.364158	0.999974
Acot13	428.346	0.075293	0.0868348	0.867083	0.385897	0.999974
Acot2	140.803	0.254884	0.168009	1.51708	0.129246	0.999974
Acot4	96.1882	0.133723	0.184841	0.72345	0.469403	0.999974
Acot7	1180.4	-0.0471876	0.134475	-0.350902	0.725662	0.999974
Acot8	378.352	-0.0471651	0.108161	-0.436063	0.662791	0.999974
Acot9	731.405	0.109592	0.114876	0.953996	0.340086	0.999974
Acox1	4978.04	0.135181	0.0926507	1.45903	0.144556	0.999974
Acox2	136.369	-0.141845	0.149007	-0.951935	0.34113	0.999974
Acox3	410.786	-0.122521	0.0907526	-1.35005	0.176999	0.999974
Acp1	489.304	-0.033351	0.0712681	-0.467966	0.639809	0.999974
Acp2	421.123	-0.058372	0.0867166	-0.673135	0.500862	0.999974
Acp5	2408.8	-0.085708	0.150108	-0.570974	0.568017	0.999974
Acp6	463.7	-0.0707653	0.12025	-0.588483	0.556208	0.999974
Acpl2	650.636	-0.0248536	0.115921	-0.214401	0.830235	0.999974
Acpp	194.518	0.0554231	0.132644	0.417835	0.676068	0.999974
Acrbp	52.5767	0.28284	0.203649	1.38886	0.164875	0.999974
Acsf2	2033.49	-0.0944145	0.104089	-0.907053	0.364379	0.999974
Acsf3	376.685	-0.0513673	0.095474	-0.538025	0.59056	0.999974
Acsl1	629.583	0.0681709	0.0737349	0.924541	0.355205	0.999974
Acsl3	4300.12	0.175219	0.189868	0.922843	0.356089	0.999974
Acsl4	1831.04	0.193886	0.142182	1.36364	0.17268	0.999974
Acsl5	1859.77	-0.0183152	0.0996793	-0.183741	0.854217	0.999974
Acsl6	36.4184	-0.122493	0.30129	-0.406564	0.684329	0.999974
Acsm3	797.068	-0.219537	0.22154	-0.990958	0.321706	0.999974
Acss1	1087.54	-0.0518794	0.0967146	-0.536418	0.59167	0.999974
Acss2	995.762	-0.0702877	0.108746	-0.646347	0.518055	0.999974
Acta1	1992.58	-0.132103	0.254908	-0.518237	0.604293	0.999974
Acta2	47119.1	0.0405702	0.180067	0.225306	0.821741	0.999974
Actb	69631	-0.126729	0.0828972	-1.52875	0.126327	0.999974
Actc1	102.788	-0.0576929	0.236824	-0.243611	0.807532	0.999974
Actg1	12181.7	-0.12216	0.0807081	-1.5136	0.130126	0.999974
Actg2	44875.7	0.145431	0.247649	0.587245	0.557039	0.999974
Actl6a	644.949	0.0244578	0.0846302	0.288997	0.772584	0.999974
Actl6b	28.4664	-0.0432172	0.32074	-0.134742	0.892816	0.999974
Actn1	9021.56	0.0399488	0.093756	0.426093	0.67004	0.999974
Actn4	17512.9	0.095629	0.0862021	1.10936	0.267276	0.999974
Actr10	1228.98	-0.0314887	0.075653	-0.416225	0.677245	0.999974
Actr1a	2774.31	0.0469518	0.0523871	0.896248	0.37012	0.999974
Actr1b	2239.44	0.0102996	0.065644	0.1569	0.875323	0.999974
Actr2	4608.32	0.0728664	0.0749277	0.97249	0.330807	0.999974
Actr3	5451.54	0.0980187	0.0991309	0.988781	0.32277	0.999974
Actr5	116.118	0.0525702	0.147463	0.356498	0.721468	0.999974
Actr6	74.3724	0.103542	0.157202	0.658654	0.510118	0.999974
Actr8	449.555	-0.04264	0.0745851	-0.571696	0.567528	0.999974
Acvr1	953.221	0.179421	0.124601	1.43997	0.149877	0.999974
Acvr1b	1267.43	0.0861375	0.0724493	1.18893	0.234465	0.999974
Acvr1c	143.086	-0.113173	0.140319	-0.806537	0.419934	0.999974
Acvr2a	790.975	0.181897	0.105703	1.72083	0.0852824	0.999974
Acvr2b	30.921	0.418135	0.226873	1.84304	0.0653239	0.999974
Acvrl1	1204.52	0.117076	0.0838449	1.39634	0.162611	0.999974
Acy1	285.913	-0.103663	0.113553	-0.91291	0.36129	0.999974
Acy3	131.062	-0.106832	0.135687	-0.787345	0.43108	0.999974
Acyp1	93.0583	-0.0614055	0.143127	-0.429028	0.667903	0.999974
Acyp2	92.7198	-0.0361064	0.148071	-0.243846	0.80735	0.999974
Ada	154.082	-0.0441318	0.129043	-0.341992	0.732357	0.999974
Adal	94.9189	-0.00904478	0.163148	-0.055439	0.955789	0.999974
Adam10	2521.91	-0.039895	0.0728816	-0.547395	0.584107	0.999974
Adam11	200.793	-0.20679	0.260449	-0.793976	0.427209	0.999974
Adam12	195.825	-0.0527938	0.147879	-0.357005	0.721088	0.999974
Adam15	1420.82	-0.0272819	0.0778118	-0.350615	0.725877	0.999974
Adam17	764.357	-0.0368464	0.0721828	-0.51046	0.609729	0.999974
Adam19	2431.2	-0.085115	0.137533	-0.618869	0.536003	0.999974
Adam22	167.426	0.202223	0.240843	0.839648	0.401106	0.999974
Adam23	378.952	-0.0770873	0.166695	-0.462445	0.643762	0.999974
Adam33	148.981	0.144939	0.241371	0.600483	0.548185	0.999974
Adam8	167.411	0.292704	0.218598	1.33901	0.180569	0.999974
Adam9	2208.4	0.0654453	0.095748	0.683515	0.494281	0.999974
Adamdec1	25535	0.0180003	0.174201	0.10333	0.917701	0.999974
Adamts1	3583.64	0.215626	0.141508	1.52377	0.127566	0.999974
Adamts10	657.63	-0.198238	0.144685	-1.37013	0.170646	0.999974
Adamts12	261.517	-0.0951018	0.168075	-0.565831	0.571508	0.999974
Adamts14	203.945	0.0202421	0.141621	0.142931	0.886345	0.999974
Adamts15	116.097	0.263069	0.177612	1.48114	0.138569	0.999974
Adamts17	417.924	-0.104063	0.109094	-0.953882	0.340143	0.999974
Adamts18	67.5413	0.197304	0.193031	1.02213	0.306717	0.999974
Adamts19	360.507	0.110851	0.143377	0.773144	0.439437	0.999974
Adamts2	832.088	-0.0183455	0.110733	-0.165673	0.868414	0.999974
Adamts20	27.96	0.0685441	0.257166	0.266537	0.789826	0.999974
Adamts3	116.164	0.0673981	0.121522	0.554617	0.579156	0.999974
Adamts4	4571.5	0.134754	0.162305	0.830248	0.406399	0.999974
Adamts5	246.872	0.212949	0.155463	1.36978	0.170757	0.999974
Adamts6	54.3692	-0.055297	0.230894	-0.23949	0.810726	0.999974
Adamts7	416.469	-0.0385587	0.092746	-0.415745	0.677597	0.999974
Adamts8	252.468	-0.00315372	0.182359	-0.0172941	0.986202	0.999974
Adamts9	1898.93	0.137433	0.194368	0.707074	0.47952	0.999974
Adamtsl1	265.649	0.0556608	0.160657	0.346457	0.728999	0.999974
Adamtsl3	132.873	-0.0231066	0.159793	-0.144603	0.885024	0.999974
Adamtsl4	365.24	0.103392	0.120579	0.857459	0.391191	0.999974
Adamtsl5	195.382	0.126565	0.15907	0.795657	0.426232	0.999974
Adap1	490.975	0.126913	0.111975	1.13341	0.257043	0.999974
Adap2	75.384	-0.229473	0.190603	-1.20393	0.228616	0.999974
Adar	1260.1	-0.0924618	0.0797161	-1.15989	0.246094	0.999974
Adarb1	256.627	0.128604	0.22717	0.566113	0.571317	0.999974
Adat1	30.9836	-0.302804	0.272098	-1.11285	0.265773	0.999974
Adat2	62.5317	-0.188354	0.164206	-1.14706	0.251355	0.999974
Adat3	77.5783	0.0823524	0.164044	0.502014	0.615658	0.999974
Adc	143.463	-0.0638235	0.256697	-0.248634	0.803644	0.999974
Adck1	139.531	-0.0474819	0.115463	-0.41123	0.680904	0.999974
Adck2	302.117	-0.0300147	0.0994767	-0.301725	0.762861	0.999974
Adck3	315.096	-0.00845702	0.135601	-0.0623668	0.950271	0.999974
Adck4	343.35	0.0182362	0.0842845	0.216365	0.828703	0.999974
Adck5	574.678	-0.0617001	0.129207	-0.477528	0.632986	0.999974
Adcy1	325.2	0.0344079	0.19902	0.172886	0.862741	0.999974
Adcy2	207.589	0.0478334	0.163134	0.293214	0.769358	0.999974
Adcy3	164.975	0.0432719	0.141125	0.30662	0.759132	0.999974
Adcy4	173.239	-0.0506537	0.119916	-0.42241	0.672726	0.999974
Adcy5	940.124	0.0656379	0.155474	0.42218	0.672894	0.999974
Adcy6	3706.26	-0.0372118	0.0737532	-0.504546	0.613878	0.999974
Adcy7	145.236	0.189505	0.143907	1.31686	0.187885	0.999974
Adcy9	201.798	-0.023273	0.151495	-0.153623	0.877907	0.999974
Adcyap1	26.679	0.307347	0.3112	0.98762	0.323339	0.999974
Adcyap1r1	469.882	-0.292126	0.265535	-1.10014	0.27127	0.999974
Add1	3797.8	-0.000758731	0.0488114	-0.0155442	0.987598	0.999974
Add2	217.547	0.115671	0.31591	0.366152	0.714252	0.999974
Add3	1355.21	0.0418868	0.0779252	0.537526	0.590904	0.999974
Adh1	1101.77	-0.085771	0.421907	-0.203294	0.838905	0.999974
Adh5	1547.34	0.00077476	0.128565	0.0060262	0.995192	0.999974
Adhfe1	36.1581	-0.0226168	0.339725	-0.0665738	0.946921	0.999974
Adi1	331.296	-0.122825	0.127691	-0.961897	0.336101	0.999974
Adipor1	2941.2	0.0410363	0.0587926	0.697984	0.485187	0.999974
Adipor2	3249.62	0.12705	0.126385	1.00527	0.314769	0.999974
Adk	1719.96	0.00066447	0.102222	0.00650024	0.994814	0.999974
Adm	1499.37	-0.19459	0.152263	-1.27798	0.201255	0.999974
Adnp	1686.92	0.275038	0.114258	2.40717	0.0160767	0.999974
Adnp2	417.187	0.0918868	0.0873646	1.05176	0.292908	0.999974
Ado	696.686	-0.0361941	0.0843053	-0.429321	0.667689	0.999974
Adora1	232.352	-0.314553	0.174992	-1.79753	0.0722519	0.999974
Adora2a	123.045	0.304389	0.156948	1.93943	0.0524495	0.999974
Adora2b	37.8737	0.0713062	0.229702	0.31043	0.756234	0.999974
Adpgk	396.875	-0.149935	0.0988682	-1.51651	0.12939	0.999974
Adprh	770.044	-0.0964754	0.0966011	-0.998699	0.317941	0.999974
Adprhl2	285.427	-0.0712508	0.142066	-0.501535	0.615995	0.999974
Adprm	166.453	-0.0637159	0.108014	-0.589887	0.555267	0.999974
Adra1b	27.6642	-0.286806	0.290137	-0.98852	0.322898	0.999974
Adra2a	845.836	-0.0454286	0.15111	-0.300633	0.763694	0.999974
Adrb1	106.102	-0.0310682	0.20015	-0.155225	0.876644	0.999974
Adrb2	30.0004	0.439724	0.225835	1.9471	0.0515231	0.999974
Adrbk1	2510.59	-0.0157867	0.043974	-0.359	0.719595	0.999974
Adrbk2	540.878	0.00850708	0.120637	0.070518	0.943781	0.999974
Adrm1	948.357	0.135845	0.0987889	1.37511	0.169098	0.999974
Adsl	544.218	-0.149697	0.0715275	-2.09287	0.0363611	0.999974
Adss	1837.11	0.134304	0.106378	1.26251	0.206764	0.999974
Adssl1	34.1242	0.112763	0.274298	0.411098	0.681001	0.999974
Adtrp	539.848	0.0806747	0.141907	0.568504	0.569693	0.999974
Aebp1	1289.49	-0.00144873	0.128823	-0.0112459	0.991027	0.999974
Aebp2	1889.28	0.0879018	0.0910332	0.965601	0.334244	0.999974
Aen	515.862	-0.222466	0.121299	-1.83403	0.0666496	0.999974
Aes	7384.76	0.0116749	0.0762781	0.153058	0.878353	0.999974
AF251705	36.2514	-0.0770251	0.339439	-0.226919	0.820487	0.999974
Afap1	1026.37	0.161908	0.108259	1.49556	0.134769	0.999974
Afap1l1	640.565	0.0608912	0.132089	0.460985	0.644809	0.999974
Afap1l2	496.362	-0.092541	0.0933315	-0.991531	0.321426	0.999974
Aff1	3019.05	0.202038	0.138732	1.45632	0.145305	0.999974
Aff3	206.518	0.179604	0.104226	1.72322	0.084848	0.999974
Aff4	4997.61	0.157007	0.175411	0.895078	0.370746	0.999974
Afg3l1	727.083	-0.0750702	0.0715141	-1.04973	0.293844	0.999974
Afg3l2	2076.49	0.0471159	0.0570475	0.825906	0.408858	0.999974
Afm	198.945	-0.0272524	0.151027	-0.180447	0.856801	0.999974
Afmid	181.91	0.0574149	0.127494	0.450335	0.652469	0.999974
Aftph	1929.13	0.214488	0.121976	1.75844	0.0786721	0.999974
Aga	395.266	0.0127388	0.108896	0.116981	0.906875	0.999974
Agap1	1099.37	0.0696984	0.0849897	0.82008	0.41217	0.999974
Agap2	221.927	-0.044302	0.20126	-0.220124	0.825775	0.999974
Agap3	1254.96	0.122082	0.086745	1.40737	0.159317	0.999974
Agbl2	26.5367	-0.116811	0.304183	-0.384017	0.700966	0.999974
Agbl5	260.861	-0.0796572	0.110257	-0.722469	0.470006	0.999974
Ager	49.4771	0.210831	0.180744	1.16646	0.243428	0.999974
Agfg1	1421.23	0.135553	0.0993753	1.36406	0.17255	0.999974
Agfg2	610.825	0.16483	0.0818715	2.01328	0.0440855	0.999974
Aggf1	729.526	0.0571164	0.0726427	0.786265	0.431712	0.999974
Agk	100.789	-0.158373	0.150976	-1.049	0.29418	0.999974
Agl	662.904	-0.0548039	0.113793	-0.481611	0.630082	0.999974
Agmat	34.4824	0.277126	0.552922	0.501202	0.616229	0.999974
Agmo	65.453	0.183512	0.320794	0.572056	0.567284	0.999974
Agpat1	1683.57	0.0128374	0.0565128	0.227159	0.8203	0.999974
Agpat2	1070.62	0.10442	0.138607	0.753356	0.451236	0.999974
Agpat3	1123.76	-0.0226436	0.0643726	-0.351758	0.72502	0.999974
Agpat4	554.993	-0.000842	0.136197	-0.00618223	0.995067	0.999974
Agpat5	718.243	0.0144239	0.0865056	0.16674	0.867575	0.999974
Agpat6	1276.01	0.00701814	0.0475189	0.147692	0.882586	0.999974
Agpat9	597.975	0.164543	0.162962	1.0097	0.312637	0.999974
Agphd1	56.6808	-0.337746	0.202812	-1.66532	0.0958495	0.999974
Agps	1192.75	0.0174286	0.109236	0.15955	0.873236	0.999974
Agr2	13517.7	-0.151528	0.138325	-1.09545	0.27332	0.999974
Agrn	2295.67	-0.0792747	0.0978696	-0.810003	0.417938	0.999974
Agt	1223.69	0.128525	0.119654	1.07414	0.28276	0.999974
Agtpbp1	353.39	0.0456694	0.139386	0.327648	0.743178	0.999974
Agtr1a	66.8291	-0.104514	0.28089	-0.372082	0.709831	0.999974
Agtr2	45.9879	-0.113361	0.231605	-0.489457	0.624518	0.999974
Agtrap	398.115	-0.144074	0.101381	-1.42111	0.155284	0.999974
Agxt2l2	154.221	-0.0241651	0.133969	-0.180379	0.856855	0.999974
Ahctf1	1576.47	0.248973	0.138216	1.80133	0.0716513	0.999974
Ahcy	826.499	0.02282	0.0979824	0.232899	0.81584	0.999974
Ahcyl1	3191.05	-0.04883	0.0641307	-0.761413	0.44641	0.999974
Ahcyl2	4919.67	-0.0722421	0.232048	-0.311325	0.755554	0.999974
Ahdc1	1212.26	0.0693686	0.102096	0.679447	0.496855	0.999974
Ahi1	474.498	0.105938	0.183106	0.57856	0.562886	0.999974
Ahnak	11625.3	0.210875	0.158729	1.32852	0.184007	0.999974
Ahr	546.645	0.0594041	0.100858	0.588987	0.55587	0.999974
Ahrr	38.6081	0.522389	0.402006	1.29946	0.193788	0.999974
Ahsa1	1367.18	-0.0304629	0.0589761	-0.51653	0.605484	0.999974
Ahsa2	271.157	0.00672128	0.0881742	0.0762273	0.939238	0.999974
AI118078	34.4211	-0.226148	0.253317	-0.892746	0.371993	0.999974
AI314180	1811.27	0.0259507	0.0679477	0.381921	0.70252	0.999974
AI316807	129.588	-0.202229	0.123777	-1.63381	0.102298	0.999974
AI413582	128.603	0.0773029	0.153832	0.502515	0.615306	0.999974
AI414108	473.874	-0.0268462	0.201139	-0.133471	0.893821	0.999974
AI462493	210.42	-0.0677849	0.125814	-0.538772	0.590044	0.999974
AI464131	302.927	-0.00127274	0.141809	-0.00897504	0.992839	0.999974
AI467606	37.4565	0.0807455	0.294492	0.274186	0.783942	0.999974
AI480653	411.128	-0.0590364	0.156001	-0.378435	0.705108	0.999974
AI504432	40.5781	-0.11704	0.279722	-0.418416	0.675643	0.999974
AI507597	32.6257	0.131405	0.272024	0.483062	0.629051	0.999974
AI597468	791.445	-0.0711869	0.119902	-0.593711	0.552705	0.999974
AI597479	233.816	-0.183999	0.159342	-1.15474	0.248196	0.999974
AI607873	125.54	-0.0584311	0.230774	-0.253196	0.800116	0.999974
AI661453	1259.39	0.259905	0.232428	1.11822	0.263475	0.999974
AI662270	28.8228	-0.284387	0.231041	-1.23089	0.218363	0.999974
AI747448	664.582	-0.0893572	0.399607	-0.223613	0.823059	0.999974
AI836003	50.9664	-0.150975	0.250778	-0.602026	0.547157	0.999974
AI837181	653.668	-0.0506335	0.115716	-0.437565	0.661702	0.999974
AI846148	699.952	0.0765625	0.0815161	0.939231	0.347612	0.999974
AI987944	83.6376	-0.141345	0.15674	-0.901777	0.367175	0.999974
Aida	633.514	-0.0906504	0.0872243	-1.03928	0.298675	0.999974
Aif1	93.8294	-0.0122107	0.164791	-0.0740979	0.940933	0.999974
Aif1l	64.0628	0.21888	0.201011	1.0889	0.276199	0.999974
Aifm1	818.677	-0.0153207	0.07656	-0.200114	0.841391	0.999974
Aifm2	217.473	-0.0102661	0.104221	-0.0985025	0.921533	0.999974
Aig1	447.374	-0.0337681	0.0712648	-0.47384	0.635614	0.999974
Aim1	1036.74	0.0486092	0.146839	0.331038	0.740616	0.999974
Aim1l	902.87	0.106637	0.185986	0.573363	0.566399	0.999974
Aim2	548.192	0.215155	0.17124	1.25645	0.208952	0.999974
Aimp1	827.977	-0.0248308	0.0748054	-0.331939	0.739935	0.999974
Aimp2	391.586	-0.00479383	0.0928506	-0.0516295	0.958824	0.999974
Aip	596.87	-0.00762449	0.0928591	-0.0821082	0.934561	0.999974
Airn	64.2459	0.109643	0.184514	0.594227	0.55236	0.999974
Ajap1	77.1083	-0.0233264	0.200777	-0.116181	0.907509	0.999974
Ajuba	282.58	0.101607	0.115855	0.877018	0.380477	0.999974
AK010878	64.9601	0.0336823	0.155952	0.215979	0.829004	0.999974
Ak1	239.292	-0.0268236	0.177672	-0.150973	0.879997	0.999974
AK129341	65.2251	0.0848653	0.170329	0.498242	0.618313	0.999974
Ak2	3569.65	0.120861	0.0992777	1.2174	0.223451	0.999974
Ak3	2495.25	-0.00230239	0.0735603	-0.0312993	0.975031	0.999974
Ak4	669.715	-0.214441	0.128192	-1.67281	0.0943642	0.999974
Ak5	58.5462	-0.058901	0.196902	-0.299139	0.764834	0.999974
Akap1	1599.28	0.156942	0.0993837	1.57916	0.1143	0.999974
Akap10	392.432	-0.0126621	0.105225	-0.120333	0.904219	0.999974
Akap11	1721.01	0.0985972	0.078482	1.2563	0.209006	0.999974
Akap12	2999.32	0.263586	0.15935	1.65414	0.0980999	0.999974
Akap13	3924.66	0.29481	0.162717	1.8118	0.0700173	0.999974
Akap17b	59.4067	0.0511529	0.192931	0.265136	0.790905	0.999974
Akap2	6532.35	-0.0563567	0.13741	-0.410135	0.681707	0.999974
Akap5	254.585	0.000924954	0.506595	0.00182583	0.998543	0.999974
Akap6	375.216	0.179856	0.194395	0.92521	0.354857	0.999974
Akap7	429.696	-0.0831	0.101637	-0.817616	0.413577	0.999974
Akap8	1162.3	0.107755	0.0705698	1.52693	0.126779	0.999974
Akap8l	573.314	0.0544601	0.0750618	0.725536	0.468123	0.999974
Akap9	1771.75	0.0491855	0.139023	0.353793	0.723494	0.999974
Akip1	171.752	-0.138392	0.137212	-1.0086	0.313167	0.999974
Akirin1	1354.82	0.260704	0.13359	1.95152	0.0509953	0.999974
Akirin2	761.185	0.140673	0.0897267	1.5678	0.116928	0.999974
Akna	238.434	0.0678076	0.119503	0.567415	0.570432	0.999974
Akr1a1	8342.93	0.0482148	0.0676828	0.712363	0.47624	0.999974
Akr1b10	109.756	-0.124994	0.126046	-0.991658	0.321365	0.999974
Akr1b7	37.4248	-0.259053	0.327387	-0.791275	0.428784	0.999974
Akr1b8	772.927	-0.213138	0.146179	-1.45806	0.144824	0.999974
Akr1c12	829.306	-0.0569805	0.111848	-0.509446	0.61044	0.999974
Akr1c13	1039.53	-0.0712153	0.105686	-0.673835	0.500416	0.999974
Akr1c14	334.307	-0.0603331	0.293781	-0.205367	0.837285	0.999974
Akr1c19	635.475	-0.0232452	0.145661	-0.159584	0.873209	0.999974
Akr1e1	383.282	0.00582783	0.0707541	0.0823674	0.934355	0.999974
Akr7a5	707.094	-0.00748611	0.142764	-0.0524371	0.95818	0.999974
Akt1	3974.79	-0.000618437	0.0518467	-0.0119282	0.990483	0.999974
Akt1s1	757.777	0.123219	0.0782779	1.57412	0.11546	0.999974
Akt2	1111.8	0.00266537	0.0650142	0.0409968	0.967298	0.999974
Akt3	771.725	0.0463911	0.145526	0.318782	0.749892	0.999974
Aktip	487.51	0.165955	0.0978805	1.69549	0.089983	0.999974
Alad	810.687	0.0334952	0.109553	0.305745	0.759799	0.999974
Alas1	2410.58	0.077027	0.135829	0.567087	0.570655	0.999974
Alas2	42.1066	-0.245695	0.252947	-0.971332	0.331383	0.999974
Alcam	927.582	0.0373375	0.0914193	0.40842	0.682965	0.999974
Aldh16a1	953.264	0.021331	0.102297	0.208521	0.834822	0.999974
Aldh18a1	1979.49	-0.0693418	0.139698	-0.496368	0.619634	0.999974
Aldh1a1	864.928	-0.0188647	0.101522	-0.185819	0.852587	0.999974
Aldh1a2	472.021	0.0754214	0.103979	0.725352	0.468236	0.999974
Aldh1a3	604.857	-0.188379	0.246702	-0.763591	0.445111	0.999974
Aldh1a7	287.602	-0.139038	0.139703	-0.995243	0.319618	0.999974
Aldh1b1	3412.75	-0.0108599	0.171717	-0.0632427	0.949573	0.999974
Aldh1l1	734.324	-0.143177	0.125332	-1.14238	0.253294	0.999974
Aldh1l2	123.651	-0.0658355	0.135746	-0.484991	0.627682	0.999974
Aldh2	4864.46	-9.48842e-05	0.130401	-0.000727636	0.999419	0.999974
Aldh3a2	1661.31	0.00126303	0.0743669	0.0169837	0.98645	0.999974
Aldh3b1	58.8115	-0.0960875	0.183776	-0.522851	0.601078	0.999974
Aldh3b2	57.0382	-0.166578	0.244856	-0.680309	0.496309	0.999974
Aldh4a1	415.23	-0.0019462	0.104532	-0.0186181	0.985146	0.999974
Aldh5a1	283.133	-0.139333	0.127279	-1.0947	0.273648	0.999974
Aldh6a1	576.356	-0.0803749	0.067081	-1.19818	0.230848	0.999974
Aldh7a1	498.87	0.0148213	0.0786392	0.188472	0.850507	0.999974
Aldh9a1	1211.83	-0.065535	0.116231	-0.563833	0.572868	0.999974
Aldoa	19865.9	0.0232482	0.0752307	0.309026	0.757302	0.999974
Aldob	1841.32	0.0512551	0.105755	0.484657	0.62792	0.999974
Aldoc	243.67	-0.102764	0.116065	-0.885397	0.375942	0.999974
Alg1	182.259	-0.0155722	0.103195	-0.1509	0.880054	0.999974
Alg10b	511.878	-0.171009	0.103792	-1.64761	0.099433	0.999974
Alg11	261.83	-0.0988129	0.131033	-0.754106	0.450785	0.999974
Alg12	166.842	-0.106585	0.117825	-0.904604	0.365675	0.999974
Alg13	191.686	0.127923	0.107283	1.19239	0.233108	0.999974
Alg14	196.966	-0.0632116	0.110134	-0.573949	0.566002	0.999974
Alg2	613.483	-0.0194083	0.128779	-0.150711	0.880204	0.999974
Alg3	191.133	-0.0908058	0.137942	-0.658291	0.510351	0.999974
Alg5	703.174	-0.0288993	0.0916205	-0.315424	0.75244	0.999974
Alg6	236.763	-2.47456e-05	0.101084	-0.000244801	0.999805	0.999974
Alg8	178.291	-0.211339	0.126344	-1.67274	0.0943793	0.999974
Alg9	760.349	-0.101101	0.0698829	-1.44672	0.147975	0.999974
Alk	34.3017	0.150038	0.383978	0.390745	0.695985	0.999974
Alkbh1	337.365	-0.151237	0.0965508	-1.5664	0.117255	0.999974
Alkbh2	78.486	0.0938428	0.139595	0.672253	0.501423	0.999974
Alkbh3	261.937	-0.0424065	0.0970208	-0.437087	0.662048	0.999974
Alkbh4	134.634	0.052296	0.134155	0.389818	0.696671	0.999974
Alkbh5	3192.94	0.183987	0.11772	1.56292	0.118071	0.999974
Alkbh6	286.653	-0.193187	0.113636	-1.70004	0.0891226	0.999974
Alkbh7	119.272	0.028087	0.145503	0.193034	0.846932	0.999974
Alkbh8	139.418	-0.0866399	0.124863	-0.69388	0.487758	0.999974
Alms1	114.687	-0.0257285	0.175275	-0.146789	0.883298	0.999974
Alox12	34.106	0.230358	0.22849	1.00817	0.313371	0.999974
Alox5ap	60.0505	0.096258	0.279538	0.344347	0.730586	0.999974
Aloxe3	38.6712	-0.233081	0.227583	-1.02416	0.30576	0.999974
Alpi	2662.13	0.0226515	0.176251	0.128519	0.897738	0.999974
Alpk1	213.662	-0.0784053	0.136676	-0.573659	0.566199	0.999974
Alpl	57.7015	-0.091632	0.208034	-0.440466	0.659599	0.999974
Als2	207.506	0.122335	0.13626	0.89781	0.369287	0.999974
Als2cl	699.781	-0.18841	0.12826	-1.46896	0.141843	0.999974
Alyref	798.002	-0.0441636	0.062703	-0.70433	0.481227	0.999974
Alyref2	32.7989	-0.122334	0.230049	-0.531777	0.594881	0.999974
Amacr	143.949	-0.0859385	0.12784	-0.672233	0.501436	0.999974
Ambra1	812.486	0.189487	0.116891	1.62105	0.105008	0.999974
Amdhd2	260.139	-0.0735182	0.152699	-0.481457	0.630192	0.999974
Amer1	209.02	-0.0332071	0.14066	-0.236081	0.813369	0.999974
Amfr	3578.12	0.0151109	0.055779	0.270907	0.786463	0.999974
Amica1	37.6112	0.43881	0.273575	1.60398	0.108718	0.999974
Amigo1	273.193	-0.275098	0.198765	-1.38403	0.166349	0.999974
Amigo2	255.102	-0.105437	0.248535	-0.424236	0.671394	0.999974
Amigo3	82.4862	0.0360321	0.165458	0.217773	0.827606	0.999974
Ammecr1	143.759	-0.159177	0.110722	-1.43762	0.150541	0.999974
Ammecr1l	1153.61	0.085208	0.0946173	0.900553	0.367826	0.999974
Amn	406.553	0.357972	0.476859	0.750688	0.45284	0.999974
Amn1	100.994	-0.204656	0.124682	-1.64142	0.10071	0.999974
Amot	529.675	0.0706906	0.131703	0.536742	0.591446	0.999974
Amotl1	1660.44	-0.0796223	0.124891	-0.637535	0.523776	0.999974
Amotl2	1059.33	0.506498	0.129747	3.90374	9.47158e-05	0.584992
Ampd2	881.779	0.0717694	0.0862891	0.831732	0.40556	0.999974
Ampd3	658.36	-0.0280019	0.115767	-0.241881	0.808872	0.999974
Amph	137.149	0.140684	0.159783	0.880468	0.378606	0.999974
Amt	114.414	-0.00426151	0.166838	-0.0255428	0.979622	0.999974
Amz1	38.2439	0.0603848	0.215442	0.280283	0.77926	0.999974
Amz2	453.393	-0.0389906	0.0964346	-0.404321	0.685977	0.999974
Anapc1	1789.18	-0.0477553	0.0667138	-0.715823	0.474101	0.999974
Anapc10	126.603	0.00615174	0.126721	0.0485457	0.961281	0.999974
Anapc11	639.13	0.0386358	0.0855093	0.451831	0.651391	0.999974
Anapc13	512.839	-0.0247471	0.0786681	-0.314576	0.753084	0.999974
Anapc15	134.164	-0.129321	0.141936	-0.91112	0.362232	0.999974
Anapc16	660.587	0.0394786	0.0924019	0.427249	0.669198	0.999974
Anapc2	1360.6	-0.000335159	0.0581476	-0.00576394	0.995401	0.999974
Anapc4	621.531	-0.0941779	0.091267	-1.03189	0.302122	0.999974
Anapc5	3508.55	-0.00321675	0.0731928	-0.0439489	0.964945	0.999974
Anapc7	807.559	0.0883013	0.073284	1.20492	0.228235	0.999974
Ang	251.796	0.0872469	0.131589	0.663027	0.507313	0.999974
Ang4	2017.91	-0.0939455	0.366468	-0.256354	0.797677	0.999974
Angel1	104.813	-0.183392	0.164582	-1.11429	0.265156	0.999974
Angel2	617.437	-0.053127	0.0788674	-0.673624	0.50055	0.999974
Angpt1	102.144	-0.0147435	0.146626	-0.100552	0.919906	0.999974
Angpt2	271.609	0.262643	0.124043	2.11735	0.0342298	0.999974
Angptl1	222.641	0.0683716	0.193784	0.352824	0.72422	0.999974
Angptl2	2235.8	-0.0107573	0.139905	-0.0768895	0.938711	0.999974
Angptl4	837.995	-0.017315	0.158158	-0.109479	0.912822	0.999974
Angptl6	68.5693	0.252718	0.178583	1.41513	0.157029	0.999974
Angptl7	63.8052	-0.103579	0.790989	-0.130949	0.895815	0.999974
Ank	1022.3	0.0509283	0.0570328	0.892965	0.371876	0.999974
Ank1	173.619	0.0535312	0.258878	0.206782	0.83618	0.999974
Ank2	655.794	0.0726325	0.191855	0.378581	0.704999	0.999974
Ank3	901.804	0.117253	0.108228	1.08339	0.278637	0.999974
Ankfy1	1659.58	-0.0312711	0.0932627	-0.335301	0.737398	0.999974
Ankhd1	1378.42	0.120672	0.146623	0.823008	0.410503	0.999974
Ankib1	1095.04	0.0848922	0.0955235	0.888704	0.374162	0.999974
Ankle1	67.0246	-0.496754	0.302395	-1.64273	0.100439	0.999974
Ankle2	543.324	-0.0819251	0.0680582	-1.20375	0.228685	0.999974
Ankmy2	364.098	-0.145882	0.0907826	-1.60694	0.108068	0.999974
Ankra2	209.64	-0.171271	0.113274	-1.51201	0.130531	0.999974
Ankrd10	1254.69	0.221609	0.0915098	2.4217	0.0154481	0.999974
Ankrd11	4469.02	0.289869	0.166937	1.7364	0.0824939	0.999974
Ankrd12	447.434	0.161246	0.118877	1.3564	0.174971	0.999974
Ankrd13a	2493.04	0.0849953	0.0834519	1.01849	0.308443	0.999974
Ankrd13b	515.262	-0.0140343	0.0794911	-0.176552	0.859861	0.999974
Ankrd13c	842.658	0.127546	0.102566	1.24355	0.213667	0.999974
Ankrd13d	56.958	0.0915428	0.198988	0.460041	0.645487	0.999974
Ankrd16	238.627	-0.167439	0.146601	-1.14214	0.253394	0.999974
Ankrd17	3407.12	0.0858558	0.138369	0.620485	0.534938	0.999974
Ankrd22	57.2473	0.201191	0.254815	0.789556	0.429787	0.999974
Ankrd23	55.0563	-0.041647	0.179329	-0.232238	0.816353	0.999974
Ankrd24	155.858	-0.182261	0.127487	-1.42965	0.152818	0.999974
Ankrd26	118.998	0.016764	0.180699	0.0927732	0.926084	0.999974
Ankrd27	572.02	-0.119249	0.0825321	-1.44488	0.148492	0.999974
Ankrd28	1953.82	0.163822	0.121781	1.34522	0.178555	0.999974
Ankrd29	51.8021	0.190669	0.274096	0.69563	0.48666	0.999974
Ankrd32	182.142	-0.0829313	0.100898	-0.821935	0.411114	0.999974
Ankrd33b	41.9101	0.221063	0.192149	1.15048	0.249947	0.999974
Ankrd34a	72.2427	0.0600173	0.223237	0.26885	0.788045	0.999974
Ankrd35	39.7108	0.242484	0.192819	1.25757	0.208548	0.999974
Ankrd37	885.258	0.416867	0.206624	2.01752	0.0436414	0.999974
Ankrd39	100.805	-0.241847	0.153228	-1.57835	0.114484	0.999974
Ankrd40	1250.48	0.00464463	0.0688566	0.0674537	0.946221	0.999974
Ankrd42	32.7483	0.260246	0.206136	1.2625	0.206769	0.999974
Ankrd44	258.884	0.199447	0.153849	1.29638	0.194843	0.999974
Ankrd46	556.62	-0.145353	0.157194	-0.924676	0.355135	0.999974
Ankrd49	115.884	-0.239212	0.186562	-1.28221	0.199768	0.999974
Ankrd50	1189.34	0.146543	0.101778	1.43983	0.149915	0.999974
Ankrd52	1613.98	-0.0571996	0.111302	-0.513913	0.607313	0.999974
Ankrd54	245.617	-0.00608753	0.101368	-0.060054	0.952113	0.999974
Ankrd6	121.631	-0.155452	0.213446	-0.728295	0.466433	0.999974
Ankrd63	38.7889	-0.487846	0.301244	-1.61944	0.105353	0.999974
Ankrd9	286.792	0.15102	0.157494	0.958897	0.337611	0.999974
Anks1	772.797	0.0791744	0.0807848	0.980066	0.327054	0.999974
Anks1b	40.2094	-0.0787575	0.295053	-0.266927	0.789526	0.999974
Anks3	336.306	-0.0699512	0.110464	-0.63325	0.52657	0.999974
Anks4b	901.573	0.0825242	0.171022	0.482537	0.629425	0.999974
Anks6	173.885	0.0872081	0.112039	0.778376	0.436348	0.999974
Ankzf1	201.752	-0.187786	0.112786	-1.66498	0.0959159	0.999974
Anln	731.846	0.114723	0.114366	1.00312	0.315802	0.999974
Ano1	1764.23	-0.0460821	0.141099	-0.326594	0.743975	0.999974
Ano10	1013.43	-0.0267456	0.0694513	-0.385099	0.700164	0.999974
Ano2	39.7647	-0.0545841	0.279229	-0.195482	0.845016	0.999974
Ano6	4180.12	0.112206	0.114183	0.98269	0.32576	0.999974
Ano7	441.56	-0.248137	0.103443	-2.39879	0.0164494	0.999974
Ano8	274.367	0.0108963	0.119014	0.0915552	0.927051	0.999974
Ano9	915.178	-0.276359	0.155935	-1.77227	0.0763497	0.999974
Anp32a	1949.11	-0.0258489	0.0680602	-0.379795	0.704097	0.999974
Anp32b	1861.44	0.0243221	0.0608512	0.399698	0.689379	0.999974
Anp32e	1932.12	0.00519931	0.0582748	0.0892205	0.928907	0.999974
Anpep	772.511	0.0188084	0.212129	0.0886652	0.929348	0.999974
Antxr1	2581.42	0.0180793	0.088664	0.203907	0.838426	0.999974
Antxr2	1254.63	0.0406543	0.0857431	0.474141	0.6354	0.999974
Anxa1	3175.12	0.00732015	0.144574	0.0506327	0.959618	0.999974
Anxa11	1849.55	-0.0075779	0.125093	-0.0605781	0.951695	0.999974
Anxa13	156.137	0.0113264	0.227255	0.04984	0.96025	0.999974
Anxa2	16027.6	0.100292	0.111167	0.902172	0.366966	0.999974
Anxa3	1117.67	-0.0130632	0.196124	-0.0666068	0.946895	0.999974
Anxa4	4299.27	-0.0332177	0.113403	-0.292919	0.769584	0.999974
Anxa5	3864.24	0.0831292	0.0732312	1.13516	0.256308	0.999974
Anxa6	4127.78	-0.00621905	0.13397	-0.0464212	0.962975	0.999974
Anxa7	2421.61	0.0274191	0.0816549	0.335793	0.737027	0.999974
Anxa8	508.034	-0.262106	0.480573	-0.545403	0.585476	0.999974
Aoah	42.94	-0.0713202	0.244993	-0.291112	0.770966	0.999974
Aoc2	95.0009	0.453554	0.243914	1.85948	0.0629594	0.999974
Aoc3	1090.17	0.0836594	0.130721	0.639984	0.522183	0.999974
Ap1ar	1365.61	-0.0485855	0.0893131	-0.543991	0.586448	0.999974
Ap1b1	1600.83	0.0113496	0.0597996	0.189795	0.84947	0.999974
Ap1g1	2235.18	0.179309	0.114272	1.56914	0.116616	0.999974
Ap1g2	534.493	-0.13819	0.120703	-1.14488	0.252257	0.999974
Ap1m1	517.814	-0.0790185	0.138598	-0.570126	0.568592	0.999974
Ap1m2	1407.37	-0.0110948	0.0897077	-0.123677	0.901571	0.999974
Ap1s1	1610.61	-0.0866432	0.0964078	-0.898716	0.368804	0.999974
Ap1s2	134.492	-0.120266	0.14274	-0.842548	0.399481	0.999974
Ap1s3	283.046	0.134428	0.249048	0.539768	0.589357	0.999974
Ap2a1	1482.25	-0.0642609	0.0597056	-1.0763	0.281795	0.999974
Ap2a2	2041.68	0.0783459	0.0713052	1.09874	0.271882	0.999974
Ap2b1	3072.73	0.00740686	0.0563047	0.131549	0.895341	0.999974
Ap2m1	1879.64	0.00558288	0.0597452	0.0934448	0.92555	0.999974
Ap2s1	1487.92	-0.00126688	0.0826036	-0.0153369	0.987763	0.999974
Ap3b1	1926.99	0.0706682	0.0977712	0.722791	0.469808	0.999974
Ap3b2	107.05	0.173116	0.305334	0.566974	0.570732	0.999974
Ap3d1	2360.01	-0.0180954	0.0639855	-0.282804	0.777327	0.999974
Ap3m1	842.423	-0.0968787	0.0656407	-1.47589	0.139972	0.999974
Ap3m2	86.8947	-0.142864	0.190278	-0.750816	0.452764	0.999974
Ap3s1	393.981	0.0484083	0.0810455	0.597297	0.550309	0.999974
Ap3s2	464.049	-0.154088	0.131595	-1.17092	0.24163	0.999974
Ap4b1	206.439	-0.0722454	0.11902	-0.606999	0.543851	0.999974
Ap4e1	346.536	-0.0335828	0.0917629	-0.365974	0.714384	0.999974
Ap4m1	169.859	-0.0220697	0.131951	-0.167257	0.867168	0.999974
Ap4s1	296.705	0.0276017	0.0926001	0.298075	0.765646	0.999974
Ap5b1	76.6263	-0.193499	0.179499	-1.07799	0.281039	0.999974
Ap5m1	325.302	-0.0602931	0.0985483	-0.611812	0.540662	0.999974
Ap5s1	166.741	-0.0805057	0.162003	-0.496941	0.619231	0.999974
Ap5z1	167.295	-0.0323202	0.132936	-0.243127	0.807907	0.999974
Apaf1	955.03	0.238628	0.149951	1.59137	0.111526	0.999974
Apba1	300.617	0.038353	0.199122	0.192611	0.847263	0.999974
Apba2	94.4938	0.102245	0.228324	0.447806	0.654293	0.999974
Apba3	611.676	-0.0766894	0.0663026	-1.15666	0.247412	0.999974
Apbb1	337.111	0.0396147	0.211827	0.187015	0.851649	0.999974
Apbb1ip	111.67	0.164653	0.13297	1.23827	0.215617	0.999974
Apbb2	464.943	0.195157	0.0965621	2.02105	0.0432746	0.999974
Apbb3	171.208	-0.170008	0.129796	-1.30981	0.190261	0.999974
Apc	2329.99	0.174552	0.146548	1.1911	0.233616	0.999974
Apc2	134.844	-0.0237677	0.307093	-0.0773958	0.938309	0.999974
Apcdd1	138.388	-0.0469171	0.132344	-0.354508	0.722958	0.999974
Apeh	797.179	-0.123435	0.09018	-1.36876	0.171075	0.999974
Apex1	136.881	-0.0534801	0.128707	-0.415518	0.677763	0.999974
Apex2	146.74	-0.0236874	0.122128	-0.193955	0.846211	0.999974
Aph1a	809.168	-0.0295916	0.0662771	-0.446483	0.655249	0.999974
Aph1b	165.451	-0.0503139	0.126021	-0.399248	0.68971	0.999974
Aph1c	24.3651	0.259199	0.275508	0.940803	0.346806	0.999974
Api5	2191.76	0.00416776	0.0572527	0.0727959	0.941969	0.999974
Apip	124.003	0.0698644	0.138438	0.504662	0.613796	0.999974
Apitd1	35.232	0.0861565	0.25518	0.33763	0.735642	0.999974
Aplf	120.609	-0.0491018	0.137413	-0.357331	0.720844	0.999974
Apln	96.1046	-0.0766098	0.266674	-0.287279	0.773899	0.999974
Aplnr	265.624	-0.314536	0.202879	-1.55036	0.121055	0.999974
Aplp1	753.004	0.179533	0.155214	1.15668	0.247402	0.999974
Aplp2	6458.88	0.078028	0.0777908	1.00305	0.315837	0.999974
Apmap	569.545	-0.0106241	0.0740677	-0.143437	0.885945	0.999974
Apoa1	33.5869	0.226275	0.604059	0.374591	0.707965	0.999974
Apoa1bp	594.224	-0.0668093	0.0885217	-0.754722	0.450416	0.999974
Apob	726.748	0.0569784	0.403461	0.141224	0.887693	0.999974
Apobec1	320.519	0.505246	0.295707	1.7086	0.0875246	0.999974
Apobec2	25.7759	0.0464521	0.229479	0.202424	0.839585	0.999974
Apobec3	311.812	-0.24694	0.151292	-1.63221	0.102635	0.999974
Apobr	61.4125	0.092889	0.182984	0.507636	0.611709	0.999974
Apoc2	28.4667	-0.179399	0.52368	-0.342573	0.731919	0.999974
Apoe	4677.64	0.127686	0.13902	0.918474	0.358371	0.999974
Apol10a	1352.63	-0.0879456	0.132119	-0.665652	0.505633	0.999974
Apol10b	27.282	-0.829945	0.387779	-2.14025	0.0323345	0.999974
Apol6	222.669	-0.0939109	0.19682	-0.477141	0.633262	0.999974
Apol7a	273.716	0.166725	0.288749	0.577405	0.563666	0.999974
Apol8	35.8822	1.89857	0.59421	3.19512	0.00139771	0.999974
Apol9a	52.0525	0.136476	0.293499	0.464997	0.641934	0.999974
Apol9b	28.5724	-0.216326	0.252253	-0.857577	0.391126	0.999974
Apold1	1031.71	-0.0970929	0.188047	-0.516323	0.605629	0.999974
Apoo	42.0143	-0.132398	0.180777	-0.732385	0.463934	0.999974
Apool	360.01	-0.0522467	0.0938012	-0.556994	0.577532	0.999974
Apopt1	332.586	-0.0111079	0.107268	-0.103552	0.917525	0.999974
App	16188.3	0.087682	0.0539975	1.62382	0.104415	0.999974
Appbp2	680.332	0.199486	0.128531	1.55204	0.120653	0.999974
Appl1	2013.41	0.0819501	0.0881593	0.929568	0.352595	0.999974
Appl2	1649.63	-0.111545	0.157275	-0.709236	0.478178	0.999974
Aprt	1559.74	-0.00239318	0.103738	-0.0230696	0.981595	0.999974
Aptx	167.246	-0.0497417	0.119263	-0.417076	0.676623	0.999974
Aqp1	2352.43	0.0655828	0.0850308	0.771282	0.44054	0.999974
Aqp11	101.142	-0.0562288	0.176647	-0.318311	0.750249	0.999974
Aqp3	43.311	0.152716	0.234749	0.650551	0.515336	0.999974
Aqp4	2455.13	-0.249075	0.439795	-0.566342	0.571161	0.999974
Aqp8	8720.77	0.17451	0.210207	0.830179	0.406437	0.999974
Aqr	821.814	-0.0917091	0.0830838	-1.10381	0.269674	0.999974
Araf	1150.14	-0.0775744	0.0541792	-1.43181	0.152198	0.999974
Arap1	1465.06	-0.13561	0.0592647	-2.28821	0.0221252	0.999974
Arap2	808.072	0.0986628	0.208723	0.472697	0.636429	0.999974
Arap3	351.109	-0.0927169	0.112062	-0.82737	0.408027	0.999974
Arc	1761.05	-0.160383	0.18134	-0.88443	0.376464	0.999974
Arcn1	4683.93	0.00836558	0.0711826	0.117523	0.906446	0.999974
Areg	2068.43	-0.104941	0.199016	-0.527299	0.597986	0.999974
Arf1	7548.56	0.0449628	0.0627737	0.716267	0.473826	0.999974
Arf2	976.644	0.181615	0.0690132	2.6316	0.00849826	0.999974
Arf3	3283.19	-0.0204893	0.0651547	-0.314472	0.753162	0.999974
Arf4	7467.26	0.0576327	0.083578	0.689568	0.490466	0.999974
Arf5	1848.56	-0.0681675	0.0710085	-0.95999	0.33706	0.999974
Arf6	5529.78	0.0375057	0.084555	0.443566	0.657357	0.999974
Arfgap1	922.001	-0.0785637	0.064922	-1.21012	0.226231	0.999974
Arfgap2	925.909	-0.144028	0.0849642	-1.69517	0.0900437	0.999974
Arfgap3	1830.64	-0.0160029	0.0614786	-0.2603	0.794632	0.999974
Arfgef1	3469.66	0.106803	0.126098	0.846983	0.397004	0.999974
Arfgef2	1228.19	0.0145339	0.0906532	0.160325	0.872625	0.999974
Arfip1	1670.81	0.0351304	0.0847845	0.414349	0.678618	0.999974
Arfip2	1163.25	-0.0604217	0.0689593	-0.876193	0.380925	0.999974
Arfrp1	377.252	-0.0830357	0.0928578	-0.894224	0.371202	0.999974
Arg1	54.4447	0.172608	0.22735	0.759215	0.447724	0.999974
Arg2	345.453	0.117112	0.143976	0.81341	0.415983	0.999974
Arglu1	763.035	-0.112827	0.11806	-0.955673	0.339238	0.999974
Arhgap1	1809.25	-0.0641943	0.0672518	-0.954536	0.339812	0.999974
Arhgap10	649.702	0.108387	0.131056	0.827027	0.408222	0.999974
Arhgap11a	550.957	0.0722695	0.130967	0.551813	0.581077	0.999974
Arhgap12	815.801	0.165999	0.115343	1.43918	0.150099	0.999974
Arhgap15	36.281	0.210057	0.210475	0.998017	0.318271	0.999974
Arhgap17	890.09	0.289767	0.130021	2.22862	0.0258389	0.999974
Arhgap18	741.598	0.0332447	0.120215	0.276545	0.78213	0.999974
Arhgap19	237.211	-0.0800952	0.137747	-0.581465	0.560927	0.999974
Arhgap20	191.371	0.0551175	0.16095	0.342451	0.732011	0.999974
Arhgap21	2327.46	0.283066	0.187623	1.5087	0.131375	0.999974
Arhgap22	91.8092	0.252317	0.186299	1.35436	0.175621	0.999974
Arhgap23	1205.28	0.294194	0.121901	2.41339	0.015805	0.999974
Arhgap24	466.279	0.163545	0.10841	1.50858	0.131407	0.999974
Arhgap25	44.3187	0.324992	0.182337	1.78237	0.0746888	0.999974
Arhgap26	454.212	0.0723105	0.12507	0.57816	0.563156	0.999974
Arhgap27	2575.49	0.137375	0.165613	0.829492	0.406826	0.999974
Arhgap28	299.712	0.032242	0.11574	0.278572	0.780573	0.999974
Arhgap29	1613.52	0.121229	0.097186	1.24739	0.212254	0.999974
Arhgap30	90.1973	0.201781	0.232943	0.866224	0.386368	0.999974
Arhgap31	744.296	-0.0063415	0.125789	-0.0504139	0.959793	0.999974
Arhgap32	1604.84	0.228563	0.126117	1.81231	0.0699384	0.999974
Arhgap33	154.885	0.0662688	0.143592	0.461509	0.644434	0.999974
Arhgap39	600.463	0.167905	0.0817672	2.05345	0.0400292	0.999974
Arhgap4	57.6202	-0.293744	0.156969	-1.87135	0.0612962	0.999974
Arhgap42	759.435	0.183103	0.158814	1.15294	0.248934	0.999974
Arhgap44	204.842	-0.00320833	0.138431	-0.0231763	0.98151	0.999974
Arhgap5	1644.84	0.0950545	0.1618	0.58748	0.556882	0.999974
Arhgap6	338.08	0.127012	0.224164	0.566601	0.570985	0.999974
Arhgap8	135.905	-0.0751583	0.146632	-0.512565	0.608256	0.999974
Arhgap9	152.139	-0.283952	0.186027	-1.52641	0.126908	0.999974
Arhgdia	8626.94	-0.0102433	0.0636965	-0.160815	0.872239	0.999974
Arhgdib	169.249	0.0471169	0.141674	0.332573	0.739457	0.999974
Arhgdig	119.676	0.0379131	0.164998	0.229779	0.818263	0.999974
Arhgef1	1757.86	-0.0200644	0.0538974	-0.37227	0.709692	0.999974
Arhgef10	323.258	0.00940349	0.10461	0.0898908	0.928374	0.999974
Arhgef10l	1056.16	0.13602	0.105557	1.28858	0.197543	0.999974
Arhgef11	1112.9	0.098956	0.111025	0.891294	0.372772	0.999974
Arhgef12	3000.81	0.161416	0.127704	1.26399	0.206233	0.999974
Arhgef15	186.925	-0.308974	0.183729	-1.68169	0.0926295	0.999974
Arhgef16	1634.02	0.0354612	0.132235	0.268168	0.78857	0.999974
Arhgef17	2830.58	-0.158216	0.162316	-0.974739	0.32969	0.999974
Arhgef18	653.377	-0.0896269	0.0714565	-1.25429	0.209738	0.999974
Arhgef19	324.172	-0.0361852	0.115841	-0.31237	0.754759	0.999974
Arhgef2	1567.41	0.0231179	0.0712281	0.324561	0.745513	0.999974
Arhgef25	551.62	-0.0930744	0.128457	-0.724555	0.468725	0.999974
Arhgef26	540.863	0.334145	0.166529	2.00652	0.0448009	0.999974
Arhgef28	848.22	0.0177128	0.109271	0.1621	0.871227	0.999974
Arhgef3	913.118	0.181853	0.105927	1.71677	0.0860203	0.999974
Arhgef37	108.912	0.50802	0.347547	1.46173	0.143815	0.999974
Arhgef38	39.7766	0.164239	0.338315	0.485461	0.62735	0.999974
Arhgef39	230.178	0.15295	0.144403	1.05919	0.289514	0.999974
Arhgef4	57.3259	-0.0310815	0.268494	-0.115762	0.907841	0.999974
Arhgef40	1155.91	-0.144268	0.0920284	-1.56765	0.116964	0.999974
Arhgef5	2490.9	0.159418	0.144155	1.10588	0.26878	0.999974
Arhgef6	207.022	0.0852862	0.11958	0.713212	0.475715	0.999974
Arhgef7	1322.43	0.103778	0.071178	1.45801	0.144838	0.999974
Arhgef9	265.257	-0.047837	0.145876	-0.327929	0.742965	0.999974
Arid1a	2434.23	0.204847	0.129491	1.58194	0.113664	0.999974
Arid1b	1723.24	0.185955	0.116155	1.60092	0.109395	0.999974
Arid2	1074.49	0.144509	0.134125	1.07743	0.28129	0.999974
Arid3a	534.528	0.210478	0.137494	1.53081	0.125817	0.999974
Arid3b	171.982	0.252465	0.156809	1.61002	0.107394	0.999974
Arid4a	883.645	0.321004	0.155835	2.0599	0.0394085	0.999974
Arid4b	1031.03	0.353485	0.149506	2.36435	0.0180615	0.999974
Arid5a	608.161	0.182571	0.13921	1.31148	0.189695	0.999974
Arid5b	855.151	0.395016	0.189736	2.08192	0.0373496	0.999974
Arih1	2501.38	0.184708	0.124571	1.48275	0.13814	0.999974
Arih2	1432.13	0.217192	0.106198	2.04516	0.0408388	0.999974
Arl1	1470.91	0.0193457	0.0903821	0.214044	0.830513	0.999974
Arl10	144.871	-0.131437	0.129684	-1.01352	0.310814	0.999974
Arl13b	404.945	0.195491	0.125143	1.56214	0.118254	0.999974
Arl14	212.229	0.127181	0.213145	0.596689	0.550715	0.999974
Arl14ep	361.421	-0.234774	0.157747	-1.4883	0.136673	0.999974
Arl15	283.058	-0.0364474	0.0945569	-0.385454	0.699901	0.999974
Arl16	145.828	-0.094319	0.13362	-0.705874	0.480266	0.999974
Arl2	314.745	-0.037756	0.143664	-0.262808	0.792699	0.999974
Arl2bp	1386.99	0.0449197	0.0646393	0.694929	0.487099	0.999974
Arl3	263.582	0.0152208	0.131809	0.115476	0.908068	0.999974
Arl4a	2025.04	-0.102972	0.0968208	-1.06353	0.287541	0.999974
Arl4c	865.802	0.064907	0.125092	0.518874	0.603848	0.999974
Arl4d	502.135	-0.313557	0.19887	-1.57669	0.114867	0.999974
Arl5a	1116.21	0.0170305	0.0717186	0.237463	0.812298	0.999974
Arl5b	663.341	0.313419	0.182742	1.71509	0.0863292	0.999974
Arl5c	63.0705	0.0594591	0.249665	0.238156	0.81176	0.999974
Arl6	83.8639	-0.0958233	0.180862	-0.529814	0.596241	0.999974
Arl6ip1	2900.24	-0.034199	0.113112	-0.302347	0.762388	0.999974
Arl6ip4	441.912	-0.119029	0.107795	-1.10422	0.2695	0.999974
Arl6ip5	1817.38	0.154234	0.102209	1.50901	0.131297	0.999974
Arl6ip6	358.037	0.0335925	0.0808708	0.415384	0.677861	0.999974
Arl8a	1297.92	0.094136	0.0648609	1.45135	0.146682	0.999974
Arl8b	1887	0.0319664	0.0437178	0.731199	0.464657	0.999974
Armc1	576.394	-0.0729231	0.0636524	-1.14565	0.251942	0.999974
Armc10	600.613	-0.173579	0.0912587	-1.90205	0.0571646	0.999974
Armc5	366.256	-0.0149011	0.100694	-0.147984	0.882356	0.999974
Armc6	121.647	-0.0587342	0.145547	-0.403543	0.686549	0.999974
Armc7	87.5181	0.223148	0.172391	1.29443	0.195517	0.999974
Armc8	648.533	-0.0325036	0.0777557	-0.418022	0.675931	0.999974
Armc9	98.7648	-0.0337103	0.149233	-0.22589	0.821287	0.999974
Armcx1	268.658	-0.0189051	0.0894982	-0.211235	0.832704	0.999974
Armcx2	919.573	0.0616236	0.103112	0.597639	0.550081	0.999974
Armcx3	282.247	-0.000554158	0.131233	-0.00422269	0.996631	0.999974
Armcx4	888.123	0.177054	0.11098	1.59536	0.110631	0.999974
Armcx5	108.179	-0.175047	0.17032	-1.02776	0.304064	0.999974
Armcx6	73.2262	0.210814	0.162171	1.29995	0.193619	0.999974
Arnt	1223.5	0.00148632	0.0643949	0.0230814	0.981585	0.999974
Arnt2	107.388	0.0692539	0.18353	0.377344	0.705918	0.999974
Arntl	417.601	0.327782	0.200661	1.63351	0.102362	0.999974
Arpc1a	1316.22	0.0328902	0.0691563	0.475592	0.634365	0.999974
Arpc1b	5471.36	0.0159918	0.0758855	0.210736	0.833094	0.999974
Arpc2	7489.28	0.100222	0.0882007	1.13629	0.255834	0.999974
Arpc3	2684.95	0.0239628	0.0739595	0.323999	0.745939	0.999974
Arpc4	1752.27	-0.0465211	0.0768772	-0.605135	0.54509	0.999974
Arpc5	4616.73	0.00322086	0.049084	0.0656193	0.947681	0.999974
Arpc5l	770.571	-0.0176871	0.0842146	-0.210024	0.833649	0.999974
Arpp19	1487.83	-0.0348965	0.0635525	-0.549097	0.582939	0.999974
Arpp21	30.1376	0.172207	0.314533	0.547501	0.584034	0.999974
Arrb1	1774	-0.0750718	0.112449	-0.66761	0.504382	0.999974
Arrb2	212.829	0.0645409	0.112522	0.573583	0.56625	0.999974
Arrdc1	897.829	-0.259366	0.102187	-2.53815	0.011144	0.999974
Arrdc2	112.368	-0.137042	0.237053	-0.578106	0.563193	0.999974
Arrdc3	1933.32	-0.132965	0.120728	-1.10137	0.270737	0.999974
Arrdc4	1753.94	0.0980438	0.153785	0.63754	0.523773	0.999974
Arsa	358.009	0.00090671	0.0976419	0.00928608	0.992591	0.999974
Arsb	881.822	-0.0323869	0.0718495	-0.45076	0.652162	0.999974
Arsg	118.952	0.0151398	0.118951	0.127277	0.898721	0.999974
Arsi	262.273	-0.0940412	0.141007	-0.666924	0.504821	0.999974
Arsj	116.094	-0.248679	0.148051	-1.67969	0.0930176	0.999974
Arsk	150.482	-0.0372737	0.100225	-0.3719	0.709967	0.999974
Art2a-ps	40.2459	-0.158826	0.477491	-0.332627	0.739416	0.999974
Art3	346.022	0.020439	0.164153	0.124512	0.90091	0.999974
Artn	81.9385	-0.0209302	0.147262	-0.142129	0.886978	0.999974
Arv1	58.8199	-0.267154	0.214309	-1.24658	0.21255	0.999974
Arvcf	350.914	0.00511641	0.201073	0.0254456	0.9797	0.999974
Arxes1	25.878	-0.190599	0.242221	-0.786879	0.431353	0.999974
Arxes2	50.7325	0.140233	0.225063	0.623082	0.533231	0.999974
As3mt	397.117	0.0861416	0.102784	0.83808	0.401986	0.999974
Asah1	2161	-0.00986408	0.102698	-0.0960498	0.923481	0.999974
Asah2	331.012	-0.0191549	0.109985	-0.174159	0.861741	0.999974
Asap1	879.937	0.359898	0.160612	2.2408	0.0250393	0.999974
Asap2	683.671	0.00126419	0.116909	0.0108134	0.991372	0.999974
Asap3	319.065	-0.191173	0.177129	-1.07929	0.280459	0.999974
Asb1	231.533	-0.0160562	0.143076	-0.112222	0.910648	0.999974
Asb11	65.421	-0.127437	0.364952	-0.349188	0.726948	0.999974
Asb13	207.9	-0.087707	0.1207	-0.726653	0.467438	0.999974
Asb2	391.783	0.10688	0.143034	0.747237	0.45492	0.999974
Asb3	123.51	0.00168632	0.132462	0.0127305	0.989843	0.999974
Asb4	50.9133	0.36253	0.243884	1.48648	0.137151	0.999974
Asb5	86.5709	0.453694	0.287902	1.57586	0.115057	0.999974
Asb6	394.037	0.138638	0.115667	1.19859	0.230686	0.999974
Asb7	426.893	0.0170318	0.116226	0.146541	0.883495	0.999974
Asb8	358.19	-0.165675	0.118777	-1.39484	0.163065	0.999974
Ascc1	405.886	-0.0200889	0.0990188	-0.20288	0.839229	0.999974
Ascc2	691.585	-0.0230513	0.0711514	-0.323976	0.745956	0.999974
Ascc3	1031.35	0.0910009	0.128403	0.708714	0.478502	0.999974
Ascl2	60.2199	0.233475	0.325532	0.717209	0.473245	0.999974
Asf1a	309.505	0.0316547	0.0719892	0.439715	0.660144	0.999974
Asf1b	146.037	-0.248261	0.134675	-1.8434	0.0652707	0.999974
Ash1l	1757.39	0.150006	0.169757	0.883652	0.376884	0.999974
Ash2l	846.08	-0.0762826	0.0618619	-1.23311	0.217534	0.999974
Asic1	62.7351	-0.148986	0.186435	-0.799128	0.424216	0.999974
Asic2	109.189	-0.0677155	0.286311	-0.23651	0.813037	0.999974
Asic4	57.9616	0.0627159	0.345825	0.181352	0.856091	0.999974
Asl	558.799	-0.0504497	0.0828506	-0.608923	0.542575	0.999974
Asna1	694.397	-0.0381342	0.0745018	-0.511856	0.608752	0.999974
Asns	1354.58	0.0794756	0.124022	0.640817	0.521641	0.999974
Asnsd1	605.844	-0.0475486	0.101363	-0.469091	0.639005	0.999974
Aspa	45.9738	0.382095	0.180723	2.11426	0.0344933	0.999974
Aspg	584.366	-0.181037	0.154411	-1.17243	0.241023	0.999974
Asph	1589.13	-0.0183162	0.0758954	-0.241335	0.809296	0.999974
Asphd2	41.8545	0.0156017	0.302601	0.0515588	0.95888	0.999974
Aspm	192.451	-0.0708807	0.176388	-0.401847	0.687797	0.999974
Aspn	4421.13	0.0329735	0.147605	0.22339	0.823232	0.999974
Aspscr1	660.725	-0.0416302	0.0909682	-0.457635	0.647215	0.999974
Asrgl1	185.698	-0.058729	0.131846	-0.445438	0.656003	0.999974
Aste1	156.529	-0.15541	0.128589	-1.20858	0.226824	0.999974
Astn1	208.262	0.114738	0.241884	0.47435	0.63525	0.999974
Astn2	176.058	0.0167565	0.15513	0.108016	0.913983	0.999974
Asun	472.151	0.0440399	0.123099	0.357761	0.720522	0.999974
Asxl1	1344.68	0.180019	0.124655	1.44415	0.148698	0.999974
Asxl2	911.272	0.0861507	0.127395	0.676248	0.498883	0.999974
Asxl3	106.436	0.0375411	0.158435	0.236949	0.812696	0.999974
Atad1	1723.09	-0.0699207	0.0625806	-1.11729	0.26387	0.999974
Atad2	450.653	0.0145412	0.109545	0.132741	0.894398	0.999974
Atad2b	700.501	0.166192	0.110389	1.50551	0.132192	0.999974
Atad3a	1213.75	-0.114114	0.078621	-1.45144	0.146657	0.999974
Atad5	141.782	-0.0297823	0.144957	-0.205456	0.837215	0.999974
Atat1	136.832	-0.136627	0.150783	-0.906122	0.364871	0.999974
Atcay	103.156	0.156547	0.301907	0.518527	0.60409	0.999974
Ate1	1108.79	0.0598902	0.0891929	0.671468	0.501922	0.999974
Atf1	636.263	0.114769	0.0708149	1.62069	0.105084	0.999974
Atf2	898.705	0.0610739	0.0901999	0.677095	0.498346	0.999974
Atf3	6589.62	-0.218261	0.162307	-1.34474	0.178709	0.999974
Atf4	10475.6	0.244085	0.107233	2.27621	0.0228335	0.999974
Atf5	1187.84	0.113755	0.111284	1.02221	0.306684	0.999974
Atf6	1726.34	0.0974416	0.10274	0.948425	0.342913	0.999974
Atf6b	854.448	-0.134676	0.0729372	-1.84646	0.064825	0.999974
Atf7	153.608	-0.106987	0.168464	-0.63507	0.525383	0.999974
Atf7ip	453.425	0.0788875	0.0867205	0.909676	0.362994	0.999974
Atg10	131.146	0.00103591	0.11515	0.0089962	0.992822	0.999974
Atg12	946.129	0.116487	0.0539545	2.15898	0.0308518	0.999974
Atg13	527.931	0.018121	0.104074	0.174118	0.861773	0.999974
Atg14	143.589	0.0267069	0.138549	0.192761	0.847146	0.999974
Atg16l1	558.92	0.00569172	0.0882136	0.064522	0.948555	0.999974
Atg16l2	150.264	-0.101156	0.151448	-0.66793	0.504179	0.999974
Atg2a	645.575	0.129997	0.104495	1.24405	0.21348	0.999974
Atg2b	1020.23	0.150396	0.104801	1.43506	0.15127	0.999974
Atg3	720.35	-0.00473273	0.0605207	-0.0782002	0.937669	0.999974
Atg4a	36.2129	0.071451	0.185631	0.384909	0.700305	0.999974
Atg4b	785.331	0.00972338	0.0646915	0.150304	0.880525	0.999974
Atg4c	240.316	0.0262207	0.0960108	0.273101	0.784775	0.999974
Atg4d	583.59	0.0780069	0.0859114	0.907992	0.363882	0.999974
Atg5	600.388	-0.0255456	0.0821151	-0.311095	0.755729	0.999974
Atg7	602.499	0.026453	0.0767511	0.344659	0.73035	0.999974
Atg9a	1147.26	0.0562031	0.0596607	0.942046	0.346169	0.999974
Athl1	425.135	-0.128288	0.0845064	-1.51808	0.128993	0.999974
Atic	1127.06	-0.144062	0.0798514	-1.80412	0.0712121	0.999974
Atl1	93.0482	0.00151751	0.190874	0.00795032	0.993657	0.999974
Atl2	1975.78	0.259822	0.12962	2.00448	0.0450186	0.999974
Atl3	1598.9	-0.0957568	0.0625162	-1.53171	0.125594	0.999974
Atm	327.906	-0.091908	0.117085	-0.784968	0.432472	0.999974
Atmin	449.432	-0.00461857	0.0764558	-0.0604083	0.95183	0.999974
Atn1	2670.67	0.130193	0.0994937	1.30856	0.190683	0.999974
Atoh1	398.063	-0.0158391	0.170242	-0.0930393	0.925872	0.999974
Atoh8	93.8779	-0.187247	0.192569	-0.972364	0.33087	0.999974
Atox1	593.914	0.0331948	0.0921004	0.360419	0.718534	0.999974
Atp10a	712.91	0.171917	0.126529	1.35871	0.174238	0.999974
Atp10b	2130.89	0.0545542	0.267714	0.203778	0.838527	0.999974
Atp10d	150.096	0.31205	0.210822	1.48016	0.13883	0.999974
Atp11a	2711.27	0.173795	0.127084	1.36756	0.171449	0.999974
Atp11b	3024.9	0.142047	0.179985	0.789214	0.429987	0.999974
Atp11c	444.474	0.0613795	0.107758	0.569608	0.568944	0.999974
Atp12a	80.5729	0.376771	0.471946	0.798336	0.424675	0.999974
Atp13a1	1193.11	-0.107492	0.0846995	-1.2691	0.204405	0.999974
Atp13a2	509.752	0.0165417	0.0880976	0.187765	0.851061	0.999974
Atp13a3	4236.67	0.12702	0.120424	1.05477	0.291529	0.999974
Atp1a1	24634.5	-0.0306513	0.100442	-0.305164	0.760241	0.999974
Atp1a2	694.313	-0.014626	0.148547	-0.0984606	0.921567	0.999974
Atp1a3	105.27	0.436424	0.344013	1.26863	0.204574	0.999974
Atp1b1	11483.9	-0.0237562	0.105259	-0.225693	0.82144	0.999974
Atp1b2	374.839	-0.0076439	0.140885	-0.0542564	0.956731	0.999974
Atp1b3	1339.92	0.0708878	0.0717374	0.988157	0.323076	0.999974
Atp2a2	10404	0.0981186	0.06116	1.60429	0.108649	0.999974
Atp2a3	8012.26	-0.104267	0.132102	-0.789294	0.42994	0.999974
Atp2b1	4538.9	0.200713	0.110979	1.80858	0.070517	0.999974
Atp2b2	59.0986	0.325129	0.36426	0.892576	0.372084	0.999974
Atp2b3	52.4579	0.0582679	0.34319	0.169783	0.865181	0.999974
Atp2b4	4609.88	0.0384366	0.183589	0.209362	0.834165	0.999974
Atp2c1	1304.26	0.108172	0.0992645	1.08974	0.27583	0.999974
Atp2c2	539.187	0.0104938	0.165593	0.0633707	0.949471	0.999974
Atp5a1	20326.7	0.0228197	0.0795091	0.287008	0.774106	0.999974
Atp5b	29196.2	0.0284322	0.0686704	0.414039	0.678846	0.999974
Atp5c1	5946.48	0.00856581	0.0703325	0.12179	0.903065	0.999974
Atp5d	5883.35	0.0290599	0.0710733	0.408873	0.682633	0.999974
Atp5e	1843.7	-0.0788468	0.0866295	-0.910161	0.362738	0.999974
Atp5f1	4281.11	0.0224945	0.0624059	0.360455	0.718507	0.999974
Atp5g1	1621	0.0117877	0.0810878	0.14537	0.884419	0.999974
Atp5g2	394.833	-0.061318	0.0822897	-0.745147	0.456183	0.999974
Atp5g3	6389.5	0.0241128	0.0750797	0.321163	0.748087	0.999974
Atp5h	2846.77	0.00019972	0.0757154	0.00263777	0.997895	0.999974
Atp5j	2271.6	0.0319559	0.0640768	0.498713	0.617981	0.999974
Atp5j2	2592.45	-0.000426981	0.0897905	-0.0047553	0.996206	0.999974
Atp5k	1011.89	-1.33118e-05	0.0820423	-0.000162256	0.999871	0.999974
Atp5o	3642.49	0.0246775	0.0784831	0.314431	0.753194	0.999974
Atp5s	124.478	0.0330792	0.120725	0.274004	0.784082	0.999974
Atp5sl	335.517	-0.0946533	0.0885614	-1.06879	0.285166	0.999974
Atp6ap1	2607.2	0.0432672	0.0640121	0.675922	0.49909	0.999974
Atp6ap2	2679.35	0.142983	0.0917489	1.55842	0.119135	0.999974
Atp6v0a1	1537.98	0.0553408	0.0584273	0.947173	0.343551	0.999974
Atp6v0a2	786.958	0.0937308	0.112779	0.8311	0.405917	0.999974
Atp6v0b	1319.95	0.042716	0.0859038	0.497253	0.619011	0.999974
Atp6v0d1	1799.36	0.0866665	0.0748709	1.15755	0.247049	0.999974
Atp6v0e	903.597	0.034611	0.0752454	0.459974	0.645535	0.999974
Atp6v0e2	410.742	0.110394	0.182382	0.605293	0.544984	0.999974
Atp6v1a	2099.59	0.148371	0.0508573	2.91739	0.00352971	0.999974
Atp6v1b2	1914.02	0.153847	0.0744256	2.06712	0.0387229	0.999974
Atp6v1c1	678.898	0.061966	0.0714646	0.867087	0.385894	0.999974
Atp6v1d	878.886	0.0978136	0.0699852	1.39763	0.162223	0.999974
Atp6v1e1	1545.83	0.10459	0.0648036	1.61395	0.106538	0.999974
Atp6v1f	923.482	0.0331726	0.100489	0.330111	0.741316	0.999974
Atp6v1g1	1098.8	0.016564	0.0618228	0.267927	0.788755	0.999974
Atp6v1g2	65.1665	0.105273	0.241984	0.435041	0.663533	0.999974
Atp6v1h	1161.01	0.0609748	0.0730695	0.834476	0.404013	0.999974
Atp7a	932.08	0.188707	0.162237	1.16316	0.244766	0.999974
Atp8a1	1211.72	-0.00465447	0.11249	-0.0413766	0.966996	0.999974
Atp8a2	240.06	-0.0736214	0.120748	-0.609711	0.542053	0.999974
Atp8b1	5307.53	0.203935	0.159961	1.2749	0.202344	0.999974
Atp8b2	1618.46	0.205834	0.109454	1.88055	0.0600334	0.999974
Atp9a	2830.8	0.035029	0.0712828	0.491409	0.623137	0.999974
Atp9b	885.611	0.00954331	0.0586062	0.162838	0.870646	0.999974
Atpaf1	70.1148	-0.277039	0.161306	-1.71748	0.0858921	0.999974
Atpaf2	376.964	-0.0645652	0.0959323	-0.673029	0.500929	0.999974
Atpbd4	212.592	-0.0580768	0.0929714	-0.624675	0.532185	0.999974
Atpif1	2981.57	-0.0200318	0.101826	-0.196725	0.844043	0.999974
Atr	348.011	-0.106611	0.112754	-0.94552	0.344393	0.999974
Atraid	708.894	0.02426	0.0906537	0.267611	0.788999	0.999974
Atrip	209.427	0.00190513	0.106644	0.0178644	0.985747	0.999974
Atrn	1238.85	0.0547598	0.0776354	0.705345	0.480595	0.999974
Atrnl1	1406.12	0.0676041	0.116633	0.579632	0.562163	0.999974
Atrx	1817.38	0.00291541	0.123561	0.0235949	0.981176	0.999974
Atxn1	885.513	0.223411	0.110995	2.0128	0.0441358	0.999974
Atxn10	1249.08	-0.0603941	0.0883459	-0.68361	0.494222	0.999974
Atxn1l	1083.79	-0.0515404	0.0926897	-0.556053	0.578175	0.999974
Atxn2	1291.23	0.217591	0.121803	1.78642	0.0740314	0.999974
Atxn2l	3435.26	0.179893	0.124773	1.44176	0.14937	0.999974
Atxn3	530.707	-0.08307	0.0837977	-0.991316	0.321531	0.999974
Atxn7	818.043	0.190895	0.159028	1.20039	0.229989	0.999974
Atxn7l1	289.791	-0.0657284	0.115137	-0.570872	0.568086	0.999974
Atxn7l2	104.462	0.138134	0.118866	1.1621	0.245193	0.999974
Atxn7l3	1546	0.0706317	0.0511163	1.38178	0.167038	0.999974
Atxn7l3b	2129.97	-0.137801	0.117558	-1.1722	0.241118	0.999974
AU019823	413.509	-0.0824837	0.074033	-1.11415	0.265216	0.999974
AU021092	41.8289	0.0571412	0.201814	0.283138	0.777071	0.999974
AU022252	115.967	-0.166204	0.153734	-1.08111	0.279647	0.999974
AU040320	1323.17	0.0455684	0.0809204	0.563126	0.573349	0.999974
AU041133	29.7515	-0.286277	0.273695	-1.04597	0.295575	0.999974
Auh	341.921	0.0298066	0.104164	0.28615	0.774763	0.999974
Aup1	1568.34	-0.0289744	0.0875871	-0.330807	0.74079	0.999974
Aurka	241.432	-0.140057	0.164781	-0.84996	0.395347	0.999974
Aurkaip1	720.341	-0.0381142	0.0689462	-0.55281	0.580393	0.999974
Aurkb	373.245	-0.191242	0.148665	-1.28639	0.198306	0.999974
Auts2	1045.07	0.203447	0.12814	1.58769	0.112356	0.999974
Aven	330.648	0.0197365	0.0887476	0.222389	0.824011	0.999974
Avil	108.016	0.0992823	0.223713	0.443793	0.657192	0.999974
Avl9	904.863	0.005526	0.112407	0.0491606	0.960791	0.999974
Avpi1	201.818	0.0456464	0.136933	0.333349	0.738871	0.999974
Avpr1a	145.52	-0.0442198	0.219578	-0.201386	0.840397	0.999974
AW011738	47.3758	-0.285753	0.213227	-1.34014	0.180201	0.999974
AW112010	1116.18	-0.249472	0.170414	-1.46392	0.143217	0.999974
AW146154	40.5464	-0.0698292	0.229916	-0.303716	0.761344	0.999974
AW209491	149.911	-0.216728	0.122426	-1.77027	0.0766817	0.999974
AW549542	36.5715	0.0260093	0.249921	0.10407	0.917114	0.999974
AW549877	926.155	-0.00941038	0.0824422	-0.114145	0.909123	0.999974
AW551984	497.99	0.0854837	0.196489	0.435057	0.663521	0.999974
AW554918	139.595	-0.11096	0.124903	-0.88837	0.374342	0.999974
Axin1	1339.52	0.201176	0.116992	1.71957	0.0855111	0.999974
Axin2	415.324	0.381681	0.16938	2.2534	0.0242342	0.999974
Axl	4015.2	-0.0773082	0.122255	-0.632351	0.527158	0.999974
Azgp1	45.0136	0.259	0.227731	1.13731	0.25541	0.999974
Azi1	223.533	-0.0336733	0.135264	-0.248945	0.803403	0.999974
Azi2	1245.01	-0.00209392	0.0741898	-0.0282238	0.977484	0.999974
Azin1	4393.26	0.142768	0.113156	1.26169	0.20706	0.999974
B230118H07Rik	168.955	0.0127835	0.11521	0.110959	0.911649	0.999974
B230120H23Rik	1394.54	0.0905908	0.118297	0.765789	0.443802	0.999974
B230206H07Rik	43.5957	0.0780077	0.272538	0.286227	0.774704	0.999974
B230217C12Rik	22.3841	0.653977	0.300137	2.17893	0.0293369	0.999974
B230219D22Rik	1483.86	-0.222283	0.110563	-2.01047	0.0443811	0.999974
B2m	11757.5	-0.0487887	0.171801	-0.283984	0.776423	0.999974
B330016D10Rik	35.1905	-0.0494855	0.201609	-0.245453	0.806106	0.999974
B3galnt1	252.892	-0.245036	0.211684	-1.15756	0.247045	0.999974
B3galnt2	350.028	-0.046622	0.0962175	-0.484548	0.627997	0.999974
B3galt1	87.9176	0.0560927	0.184879	0.303401	0.761584	0.999974
B3galt2	85.8246	-0.0589581	0.2159	-0.273081	0.784791	0.999974
B3galt4	60.5927	-0.0304755	0.190596	-0.159896	0.872963	0.999974
B3galt5	4564.32	-0.277437	0.538784	-0.514932	0.606601	0.999974
B3galt6	93.2937	-0.198125	0.17715	-1.1184	0.263396	0.999974
B3galtl	417.383	-0.126277	0.0810925	-1.55719	0.119424	0.999974
B3gat2	29.4105	0.0810351	0.293008	0.276563	0.782116	0.999974
B3gat3	527.267	-0.0673084	0.110886	-0.607008	0.543846	0.999974
B3gnt1	293.876	0.00967385	0.132739	0.0728788	0.941903	0.999974
B3gnt2	1379.05	0.100485	0.0895964	1.12153	0.262061	0.999974
B3gnt3	1728.83	-0.103713	0.137759	-0.752856	0.451536	0.999974
B3gnt5	571.043	-0.280678	0.17463	-1.60727	0.107995	0.999974
B3gnt6	530.709	-0.240224	0.27533	-0.872495	0.382939	0.999974
B3gnt7	551.879	0.145807	0.386576	0.377174	0.706044	0.999974
B3gnt8	30.0533	-0.330961	0.313534	-1.05558	0.291159	0.999974
B3gnt9	188.64	-0.101841	0.105841	-0.962204	0.335947	0.999974
B3gntl1	79.2714	-0.175763	0.165484	-1.06212	0.288181	0.999974
B4galnt1	1320.38	-0.0774005	0.0931147	-0.831238	0.405839	0.999974
B4galnt2	5478.91	-0.0730448	0.179826	-0.406197	0.684598	0.999974
B4galnt3	173.112	0.091505	0.23704	0.386032	0.699473	0.999974
B4galnt4	110.923	-0.0693477	0.20436	-0.339341	0.734353	0.999974
B4galt1	3424.69	0.194528	0.0908697	2.14074	0.032295	0.999974
B4galt2	340.92	-0.0929919	0.146994	-0.632626	0.526978	0.999974
B4galt3	696.235	0.241573	0.0871189	2.77291	0.00555573	0.999974
B4galt4	282.639	-0.0726594	0.11241	-0.646381	0.518033	0.999974
B4galt5	2059.32	0.0589899	0.0715756	0.824162	0.409847	0.999974
B4galt6	1005.68	0.0344988	0.147206	0.234357	0.814708	0.999974
B4galt7	268.838	-0.11081	0.121922	-0.908857	0.363426	0.999974
B630005N14Rik	569.79	0.180846	0.130111	1.38994	0.164548	0.999974
B630019K06Rik	70.203	0.00092671	0.226248	0.00409599	0.996732	0.999974
B930041F14Rik	71.2581	-0.244924	0.306637	-0.798744	0.424439	0.999974
B9d1	80.7978	-0.12911	0.190575	-0.677477	0.498103	0.999974
B9d2	92.4451	0.0930791	0.135236	0.688269	0.491283	0.999974
Babam1	734.56	-0.0301251	0.0752382	-0.400397	0.688864	0.999974
Bace1	1157.59	-0.0213686	0.0991051	-0.215616	0.829287	0.999974
Bace2	798.459	-0.0171008	0.0898849	-0.190252	0.849112	0.999974
Bach1	2381.26	0.217245	0.141029	1.54042	0.123457	0.999974
Bach2	233.153	0.166851	0.225623	0.739512	0.459596	0.999974
Bad	379.545	-0.0257574	0.0929167	-0.277209	0.781619	0.999974
Bag1	2461.33	0.0320999	0.0671779	0.477835	0.632768	0.999974
Bag2	1636.67	0.0103748	0.133764	0.0775605	0.938178	0.999974
Bag3	2207.31	0.350795	0.13714	2.55793	0.0105297	0.999974
Bag4	475.246	0.112895	0.11632	0.970552	0.331771	0.999974
Bag5	534.241	0.0508932	0.0806391	0.631123	0.52796	0.999974
Bag6	3069.46	0.0447102	0.0529519	0.844354	0.398472	0.999974
Bahcc1	396.661	0.0808051	0.142345	0.56767	0.570259	0.999974
Bahd1	980.522	0.274226	0.102378	2.67857	0.00739383	0.999974
Bai1	82.3601	-0.122655	0.190447	-0.64404	0.51955	0.999974
Bai2	367.699	0.155622	0.16138	0.964318	0.334886	0.999974
Bai3	64.15	-0.0792773	0.275936	-0.287303	0.77388	0.999974
Baiap2	804.936	0.134594	0.157765	0.853131	0.393587	0.999974
Baiap2l1	1908.92	0.0952915	0.172583	0.552149	0.580846	0.999974
Baiap2l2	927.586	-0.0868368	0.169699	-0.51171	0.608854	0.999974
Baiap3	51.9272	0.0731744	0.200971	0.364105	0.71578	0.999974
Bak1	2179.38	-0.0857845	0.074625	-1.14954	0.250333	0.999974
Bambi	238.814	0.211527	0.116399	1.81725	0.0691782	0.999974
Banf1	1390.34	-0.0253017	0.074643	-0.338969	0.734633	0.999974
Banp	238.924	-0.0524602	0.131861	-0.397845	0.690745	0.999974
Bap1	1118.26	0.0469899	0.0518677	0.905957	0.364959	0.999974
Bard1	88.2457	-0.451217	0.140426	-3.21321	0.00131259	0.999974
Basp1	1655.34	0.187524	0.163458	1.14723	0.251287	0.999974
Batf	61.7965	0.109376	0.207109	0.528106	0.597426	0.999974
Batf2	59.4938	-0.50272	0.229971	-2.18601	0.0288147	0.999974
Batf3	48.322	-0.123407	0.221541	-0.557038	0.577502	0.999974
Bax	742.244	-0.0218799	0.0811484	-0.269629	0.787446	0.999974
Baz1a	1163.85	0.306802	0.201258	1.52443	0.127402	0.999974
Baz1b	2231.86	0.137486	0.0761869	1.80459	0.0711386	0.999974
Baz2a	2505.55	0.0741902	0.126154	0.588093	0.55647	0.999974
Baz2b	983.352	0.301871	0.161028	1.87464	0.0608419	0.999974
Bbc3	185.408	0.221927	0.115735	1.91754	0.0551696	0.999974
Bbip1	338.485	0.0397091	0.0717751	0.553243	0.580097	0.999974
Bbs1	70.8777	-0.120125	0.195691	-0.613852	0.539313	0.999974
Bbs12	30.4802	-0.281207	0.27803	-1.01143	0.311812	0.999974
Bbs2	145.621	0.0199069	0.118836	0.167516	0.866964	0.999974
Bbs4	120.97	-0.0651376	0.15098	-0.431432	0.666154	0.999974
Bbs5	63.2188	0.00319611	0.166429	0.0192041	0.984678	0.999974
Bbs7	88.75	0.102458	0.122391	0.837136	0.402516	0.999974
Bbs9	115.632	0.029982	0.116955	0.256355	0.797676	0.999974
Bbx	694.981	0.022066	0.0918165	0.240327	0.810076	0.999974
BC003331	502.294	-0.0378862	0.0673667	-0.562387	0.573852	0.999974
BC003965	318.635	-0.177461	0.1184	-1.49883	0.133918	0.999974
BC004004	719.381	0.0108623	0.0750949	0.144648	0.884989	0.999974
BC005537	2316.88	0.0980019	0.0810321	1.20942	0.226501	0.999974
BC005561	210.527	0.168711	0.150899	1.11804	0.263549	0.999974
BC005624	345.594	-0.00237481	0.0844335	-0.0281263	0.977561	0.999974
BC005764	224.409	0.132187	0.123793	1.0678	0.285609	0.999974
BC016423	743.429	0.00367708	0.112905	0.032568	0.974019	0.999974
BC016579	576.936	0.572191	0.299745	1.90892	0.0562718	0.999974
BC017158	299.114	-0.150228	0.136414	-1.10127	0.270781	0.999974
BC017612	226.632	-0.0810907	0.153776	-0.527332	0.597963	0.999974
BC017643	406.789	0.00544932	0.0833379	0.0653883	0.947865	0.999974
BC018242	156.092	-0.0161995	0.189618	-0.0854325	0.931918	0.999974
BC018507	968.952	0.0596559	0.0912795	0.653552	0.513401	0.999974
BC021614	121.031	-0.114605	0.222539	-0.514987	0.606562	0.999974
BC021767	32.1522	-0.337269	0.238385	-1.41481	0.157125	0.999974
BC021891	411.72	0.327689	0.130773	2.50579	0.0122178	0.999974
BC022687	114.302	-0.0139388	0.232346	-0.0599913	0.952163	0.999974
BC023829	294.048	-0.0264204	0.0962012	-0.274637	0.783595	0.999974
BC024978	46.988	-0.249306	0.200101	-1.2459	0.212801	0.999974
BC026585	155.129	-0.0360738	0.147049	-0.245318	0.80621	0.999974
BC026590	205.49	-0.10761	0.10644	-1.01099	0.312022	0.999974
BC027231	410.942	0.108416	0.115647	0.937471	0.348516	0.999974
BC029214	165.669	0.120261	0.120141	1.001	0.316826	0.999974
BC029722	147.236	-0.041983	0.129729	-0.32362	0.746225	0.999974
BC030336	277.636	0.0406314	0.119165	0.340967	0.733129	0.999974
BC030867	77.536	-0.0186939	0.1537	-0.121626	0.903195	0.999974
BC030870	778.819	-0.0541035	0.21469	-0.252008	0.801035	0.999974
BC031181	870.165	0.0358484	0.0737305	0.486209	0.626819	0.999974
BC037034	324.763	-0.156393	0.115821	-1.35029	0.176922	0.999974
BC048403	101.538	-0.184242	0.156701	-1.17575	0.239694	0.999974
BC052040	96.1538	0.087596	0.152444	0.574612	0.565554	0.999974
BC053749	48.6823	-0.0384854	0.236571	-0.16268	0.87077	0.999974
BC055324	54.3809	-0.10263	0.193685	-0.529879	0.596196	0.999974
BC056474	383.412	-0.0283943	0.0914955	-0.310335	0.756306	0.999974
BC068157	43.94	0.00217463	0.176814	0.012299	0.990187	0.999974
BC068281	35.8566	-0.373392	0.32275	-1.15691	0.247311	0.999974
Bcam	836.888	-0.0101824	0.128165	-0.0794471	0.936677	0.999974
Bcan	29.711	0.105354	0.357668	0.294559	0.768331	0.999974
Bcap29	273.105	-0.0662038	0.104892	-0.631161	0.527935	0.999974
Bcap31	2068.62	0.0260815	0.0695377	0.37507	0.707608	0.999974
Bcar1	2788.37	0.24845	0.086657	2.86705	0.00414323	0.999974
Bcar3	840.039	0.117011	0.171903	0.680678	0.496075	0.999974
Bcas1	1175.78	-0.0832578	0.133564	-0.623355	0.533051	0.999974
Bcas2	749.31	0.023161	0.0667729	0.346862	0.728695	0.999974
Bcas3	310.619	0.0175201	0.0889473	0.196972	0.843849	0.999974
Bcat1	134.053	0.118837	0.178008	0.667594	0.504393	0.999974
Bcat2	606.055	-0.118332	0.0892187	-1.32632	0.184734	0.999974
Bccip	758.159	-0.0426817	0.0673892	-0.633361	0.526498	0.999974
Bcdin3d	39.5165	-0.163451	0.255816	-0.638938	0.522863	0.999974
Bche	782.425	0.0272982	0.117006	0.233305	0.815525	0.999974
Bckdha	679.246	0.00932499	0.075607	0.123335	0.901842	0.999974
Bckdhb	152.363	0.0308658	0.14505	0.212793	0.831488	0.999974
Bckdk	750.324	-0.103103	0.0985557	-1.04614	0.295498	0.999974
Bcl10	1315.59	0.230178	0.115326	1.99589	0.045946	0.999974
Bcl11a	278.706	0.0631543	0.102756	0.614606	0.538815	0.999974
Bcl11b	187.569	-0.0292851	0.16191	-0.180873	0.856468	0.999974
Bcl2	369.27	-0.119672	0.111593	-1.0724	0.283541	0.999974
Bcl2a1b	51.681	0.212987	0.249897	0.852298	0.394049	0.999974
Bcl2l1	882.601	0.0347146	0.0701398	0.494935	0.620646	0.999974
Bcl2l11	214.554	0.137897	0.174758	0.789075	0.430068	0.999974
Bcl2l12	96.0962	-0.0799945	0.16872	-0.474127	0.635409	0.999974
Bcl2l13	1103.38	0.0427442	0.0795835	0.537099	0.591199	0.999974
Bcl2l14	535.259	-0.070652	0.141517	-0.499247	0.617605	0.999974
Bcl2l2	1222.24	-0.0189257	0.0695234	-0.272221	0.785452	0.999974
Bcl3	2065.57	0.113357	0.123327	0.919159	0.358013	0.999974
Bcl6	586.407	0.37404	0.220294	1.69792	0.0895235	0.999974
Bcl6b	173.06	-0.198073	0.159096	-1.245	0.213133	0.999974
Bcl7a	231.483	-0.125017	0.142138	-0.879548	0.379104	0.999974
Bcl7b	526.395	0.109356	0.0941181	1.1619	0.245276	0.999974
Bcl7c	202.497	-0.0412051	0.141837	-0.290511	0.771426	0.999974
Bcl9	1136.61	0.16213	0.130271	1.24456	0.213294	0.999974
Bcl9l	1102.36	0.319777	0.148492	2.15349	0.0312799	0.999974
Bclaf1	1776.09	-0.00108801	0.0730789	-0.0148882	0.988121	0.999974
Bco2	186.24	-0.01413	0.118566	-0.119174	0.905137	0.999974
Bcor	1561.29	0.176867	0.102984	1.71743	0.0859015	0.999974
Bcorl1	483.082	0.241533	0.144049	1.67675	0.0935916	0.999974
Bcr	1604.25	0.0975024	0.112226	0.868807	0.384953	0.999974
Bcs1l	157.765	-0.0068063	0.0983348	-0.0692155	0.944818	0.999974
Bdh1	2936.51	0.0328252	0.0771132	0.425676	0.670344	0.999974
Bdh2	32.9391	-0.0433323	0.23548	-0.184017	0.854	0.999974
Bdkrb1	123.549	-0.0168485	0.211408	-0.0796966	0.936479	0.999974
Bdkrb2	539.662	-0.029474	0.155357	-0.189718	0.84953	0.999974
Bdnf	92.8401	0.406111	0.169053	2.40227	0.0162938	0.999974
Bdp1	1129.69	0.25838	0.150811	1.71327	0.0866628	0.999974
Bean1	226.207	-0.0089371	0.195369	-0.0457447	0.963514	0.999974
Becn1	1279.89	-0.0266411	0.0601561	-0.442867	0.657862	0.999974
Begain	79.935	0.00560073	0.211456	0.0264866	0.978869	0.999974
Bend3	281.266	0.0863856	0.116852	0.739276	0.45974	0.999974
Bend4	77.728	0.168876	0.2441	0.691829	0.489045	0.999974
Bend5	146.671	-0.0427977	0.152343	-0.280929	0.778765	0.999974
Bend6	31.7408	0.127042	0.312212	0.406909	0.684075	0.999974
Bend7	153.347	0.186128	0.149667	1.24361	0.213642	0.999974
Best2	141.78	-0.234138	0.307308	-0.761898	0.446121	0.999974
Bet1	398.192	-0.0832494	0.0946519	-0.879532	0.379113	0.999974
Bet1l	357.651	-0.0787399	0.124703	-0.631422	0.527765	0.999974
Beta-s	658.074	-0.205528	0.17534	-1.17217	0.241131	0.999974
Bex1	164.149	0.0100699	0.118635	0.0848812	0.932356	0.999974
Bex2	293.17	0.114262	0.159734	0.71533	0.474405	0.999974
Bex4	60.9063	0.170853	0.233583	0.731444	0.464508	0.999974
Bfar	745.059	-0.00589155	0.0831442	-0.0708594	0.94351	0.999974
Bfsp1	56.2482	-0.103464	0.189886	-0.544873	0.585841	0.999974
Bglap3	150.826	0.232809	0.536916	0.433604	0.664576	0.999974
Bgn	5657.62	-0.0122656	0.0775588	-0.158146	0.874342	0.999974
Bhlha15	51.4908	0.365673	0.404821	0.903295	0.366369	0.999974
Bhlhb9	297.873	-0.238686	0.116559	-2.04777	0.0405824	0.999974
Bhlhe40	9383.88	-0.0214273	0.120101	-0.178411	0.8584	0.999974
Bhlhe41	69.0172	-0.14495	0.274537	-0.527981	0.597512	0.999974
Bicc1	393.757	-0.126547	0.115071	-1.09973	0.271451	0.999974
Bicd1	98.2413	-0.0415424	0.140261	-0.29618	0.767093	0.999974
Bicd2	1455.37	0.0203999	0.127069	0.160541	0.872455	0.999974
Bid	247.452	-0.0493107	0.121313	-0.406474	0.684395	0.999974
Bik	99.2283	-0.0411846	0.200366	-0.205547	0.837145	0.999974
Bin1	937.938	0.129019	0.0895665	1.44049	0.14973	0.999974
Bin2	60.9971	0.10863	0.223452	0.486142	0.626866	0.999974
Bin3	324.234	-0.0286674	0.0818577	-0.35021	0.726181	0.999974
Birc2	645.055	-0.033686	0.0849875	-0.396364	0.691836	0.999974
Birc3	1234.65	0.0482644	0.122522	0.393926	0.693636	0.999974
Birc5	331.245	-0.0635151	0.122564	-0.518219	0.604306	0.999974
Birc6	2193.64	0.0831917	0.159464	0.521694	0.601883	0.999974
Bivm	160.692	0.0220064	0.10546	0.208671	0.834705	0.999974
Blcap	668.495	-0.0513225	0.0744601	-0.689262	0.490659	0.999974
Blm	152.045	-0.106665	0.142676	-0.747599	0.454702	0.999974
Blmh	1454.68	0.0544249	0.082031	0.663468	0.507031	0.999974
Blnk	1195.42	0.165915	0.2053	0.808159	0.418999	0.999974
Bloc1s1	583.846	0.0193545	0.104672	0.184906	0.853303	0.999974
Bloc1s2a	186.018	0.0201102	0.110039	0.182754	0.854991	0.999974
Bloc1s3	126.192	-0.0909453	0.13963	-0.651332	0.514832	0.999974
Bloc1s4	164.855	0.157118	0.122707	1.28043	0.200392	0.999974
Bloc1s5	185.654	-0.0806368	0.11573	-0.696764	0.485951	0.999974
Bloc1s6	326.163	-0.162036	0.113538	-1.42715	0.153535	0.999974
Blvra	241.779	-0.0755104	0.111879	-0.674932	0.499719	0.999974
Blvrb	557.196	0.0123639	0.0833339	0.148366	0.882054	0.999974
Blzf1	354.019	0.0486502	0.0834814	0.582766	0.560051	0.999974
Bmf	278.69	-0.0571091	0.1172	-0.487279	0.626061	0.999974
Bmi1	454.171	0.0347146	0.0861864	0.402785	0.687106	0.999974
Bmp1	2128.27	0.00659449	0.0939452	0.0701951	0.944038	0.999974
Bmp2	967.488	0.241033	0.107209	2.24826	0.0245598	0.999974
Bmp2k	550.757	0.261058	0.158334	1.64878	0.0991926	0.999974
Bmp3	390.197	-0.142449	0.156927	-0.907741	0.364015	0.999974
Bmp4	1021.1	0.0337281	0.0858347	0.392942	0.694362	0.999974
Bmp5	748.782	-0.0712758	0.12491	-0.570615	0.568261	0.999974
Bmp6	191.848	0.0922388	0.12682	0.727319	0.467031	0.999974
Bmp7	321.506	0.104517	0.10654	0.981016	0.326585	0.999974
Bmp8a	50.4662	-0.144665	0.373983	-0.386823	0.698887	0.999974
Bmp8b	48.2784	0.110344	0.468642	0.235455	0.813856	0.999974
Bmper	161.503	0.337122	0.225501	1.49499	0.134917	0.999974
Bmpr1a	2877.84	0.106203	0.108281	0.980809	0.326687	0.999974
Bmpr2	707.12	-0.00623099	0.186053	-0.0334904	0.973284	0.999974
Bms1	821.49	-0.0548093	0.0642707	-0.852789	0.393776	0.999974
Bmyc	162.629	-0.336091	0.180005	-1.86713	0.0618839	0.999974
Bnc2	136.324	-0.0819419	0.188949	-0.433673	0.664526	0.999974
Bnip1	271.141	-0.0569106	0.116056	-0.490371	0.623871	0.999974
Bnip2	1093.68	0.054654	0.0791115	0.690847	0.489662	0.999974
Bnip3	894.949	-0.0471092	0.114372	-0.411895	0.680417	0.999974
Bnip3l	967.347	0.00219913	0.0679663	0.0323562	0.974188	0.999974
Bnipl	34.1041	0.0495803	0.376175	0.131801	0.895142	0.999974
Boc	875.806	-0.0281001	0.166664	-0.168603	0.866109	0.999974
Bod1	629.339	-0.00447055	0.0784413	-0.0569923	0.954551	0.999974
Bod1l	717.994	0.0640681	0.0969597	0.66077	0.50876	0.999974
Bok	831.71	0.0436516	0.0975228	0.447605	0.654439	0.999974
Bola1	124.766	-0.0850313	0.157859	-0.538654	0.590125	0.999974
Bola2	193.821	-0.0895905	0.108912	-0.822596	0.410738	0.999974
Bola3	311.754	-0.0767345	0.103085	-0.744378	0.456648	0.999974
Bop1	786.701	-0.105066	0.0680962	-1.54291	0.122853	0.999974
Bora	194.542	0.108398	0.131882	0.821934	0.411114	0.999974
Bpgm	1156.96	0.058897	0.112586	0.523131	0.600883	0.999974
Bphl	281.95	-0.068866	0.0957328	-0.719356	0.471922	0.999974
Bpnt1	1354.4	0.0187427	0.0924305	0.202776	0.83931	0.999974
Bptf	1871.83	0.1924	0.154964	1.24158	0.214392	0.999974
Braf	1040.02	0.0912559	0.138031	0.661124	0.508533	0.999974
Brap	879.887	0.0570247	0.0712891	0.799909	0.423764	0.999974
Brca1	160.071	-0.187926	0.139358	-1.34851	0.177494	0.999974
Brca2	121.776	0.0171219	0.143616	0.11922	0.905101	0.999974
Brcc3	465.439	-0.0825707	0.101793	-0.811161	0.417273	0.999974
Brd1	1909.52	0.168385	0.121648	1.3842	0.166296	0.999974
Brd2	5025.01	0.223356	0.118081	1.89156	0.0585501	0.999974
Brd3	1258.61	-0.0302845	0.0667789	-0.453504	0.650186	0.999974
Brd4	2737.17	0.137114	0.093936	1.45965	0.144386	0.999974
Brd7	764.886	-0.103146	0.0830267	-1.24233	0.214115	0.999974
Brd8	683.707	-0.00620187	0.0783505	-0.0791554	0.936909	0.999974
Brd9	443.82	-0.046266	0.0728709	-0.634903	0.525491	0.999974
Brdt	55.3252	0.0676721	0.208792	0.324113	0.745853	0.999974
Bre	583.816	0.0509589	0.0771201	0.660773	0.508758	0.999974
Brf1	608.89	-0.0582583	0.0687199	-0.847764	0.396569	0.999974
Brf2	89.7474	-0.135207	0.150338	-0.899353	0.368465	0.999974
Bri3	807.65	-0.00175417	0.0853677	-0.0205484	0.983606	0.999974
Bri3bp	635.331	-0.126694	0.0899956	-1.40778	0.159197	0.999974
Brip1	96.3993	-0.0372734	0.166906	-0.22332	0.823286	0.999974
Brix1	703.352	-0.0217531	0.0810819	-0.268285	0.78848	0.999974
Brk1	1462.72	-0.0523981	0.0843769	-0.621001	0.534599	0.999974
Brms1	376.646	0.0158173	0.100431	0.157495	0.874855	0.999974
Brms1l	250.995	0.129375	0.107788	1.20028	0.230031	0.999974
Brox	665.302	0.0518721	0.0655697	0.791098	0.428887	0.999974
Brpf1	1071.78	0.0957115	0.102375	0.934915	0.349832	0.999974
Brpf3	1612.38	0.020046	0.0829922	0.241541	0.809136	0.999974
Brsk1	277.822	0.0646098	0.105911	0.610037	0.541838	0.999974
Brsk2	105.255	0.103226	0.32641	0.316245	0.751817	0.999974
Brwd1	986.975	0.141272	0.125769	1.12326	0.261327	0.999974
Brwd3	403.566	0.280223	0.191073	1.46657	0.142492	0.999974
Bscl2	629.248	0.102366	0.0866998	1.18069	0.237724	0.999974
Bsdc1	1071.51	0.139069	0.112837	1.23248	0.21777	0.999974
Bsg	13794.3	0.00975487	0.0803822	0.121356	0.903409	0.999974
Bsn	339.236	0.0298477	0.163759	0.182266	0.855374	0.999974
Bspry	2075.8	0.0215095	0.132785	0.161988	0.871316	0.999974
Bst1	38.2349	0.349018	0.343371	1.01644	0.309418	0.999974
Bst2	389.534	-0.161416	0.142285	-1.13445	0.256604	0.999974
Btaf1	1126.45	0.254915	0.140963	1.80838	0.0705474	0.999974
Btbd1	992.997	0.0148298	0.080131	0.18507	0.853174	0.999974
Btbd10	551.494	0.240758	0.127363	1.89033	0.0587134	0.999974
Btbd11	102.458	0.271101	0.198194	1.36786	0.171357	0.999974
Btbd19	53.9784	-0.18538	0.167142	-1.10912	0.267379	0.999974
Btbd2	662.84	-0.0589744	0.10256	-0.575021	0.565277	0.999974
Btbd3	1605.9	0.236121	0.0906224	2.60554	0.00917283	0.999974
Btbd6	197.62	-0.0649184	0.124008	-0.523502	0.600625	0.999974
Btbd7	955.357	0.239595	0.154654	1.54923	0.121326	0.999974
Btbd9	835.596	0.0138124	0.123166	0.112145	0.910708	0.999974
Btc	409.964	0.0571833	0.223581	0.255762	0.798135	0.999974
Btd	347.982	0.0776118	0.142659	0.544038	0.586415	0.999974
Btf3	3094.93	0.0452269	0.0556825	0.812228	0.416661	0.999974
Btf3l4	149.587	-0.159251	0.108066	-1.47365	0.140577	0.999974
Btg1	4522.57	0.25348	0.106409	2.38212	0.0172135	0.999974
Btg2	8559.72	-0.399035	0.16059	-2.4848	0.0129623	0.999974
Btk	27.7944	0.233284	0.262051	0.890226	0.373344	0.999974
Btnl1	380.053	0.0782058	0.310358	0.251986	0.801052	0.999974
Btnl2	53.2125	-0.0188478	0.267482	-0.0704637	0.943825	0.999974
Btnl4	335.751	-0.0022024	0.14842	-0.014839	0.988161	0.999974
Btnl5	1401.35	-0.147084	0.132864	-1.10703	0.26828	0.999974
Btnl6	547.272	0.0741466	0.179736	0.412529	0.679951	0.999974
Btrc	398.112	0.0740788	0.0872162	0.84937	0.395675	0.999974
Bub1	248.591	-0.0552453	0.115888	-0.476715	0.633565	0.999974
Bub1b	540.148	-0.0170806	0.118963	-0.14358	0.885832	0.999974
Bub3	1049.68	-0.0512775	0.0751729	-0.682128	0.495158	0.999974
Bud13	192.916	-0.0846878	0.117998	-0.717704	0.47294	0.999974
Bud31	489.605	0.100096	0.101429	0.986854	0.323714	0.999974
Bves	270.443	0.147199	0.207363	0.709864	0.477789	0.999974
Bysl	564.898	-0.0769546	0.080884	-0.951419	0.341392	0.999974
Bzrap1	45.8776	-0.0249516	0.351046	-0.0710779	0.943336	0.999974
Bzw1	5203.24	0.0371918	0.0782142	0.475512	0.634422	0.999974
Bzw2	1338.86	-0.0115832	0.0577534	-0.200563	0.84104	0.999974
C030006K11Rik	133.981	-0.0804916	0.144288	-0.557853	0.576945	0.999974
C030046E11Rik	1083.64	0.153938	0.130709	1.17772	0.238908	0.999974
C130074G19Rik	1246.74	0.0550995	0.143646	0.383579	0.701291	0.999974
C1d	670.731	-0.0593248	0.0962935	-0.616083	0.53784	0.999974
C1galt1	1340.64	0.0586082	0.200431	0.29241	0.769973	0.999974
C1galt1c1	694.893	0.0320092	0.112535	0.284437	0.776076	0.999974
C1qa	509.096	0.0152505	0.188978	0.0807001	0.93568	0.999974
C1qb	504.367	0.0495702	0.171307	0.289364	0.772303	0.999974
C1qbp	1723.27	-0.0787871	0.0673533	-1.16976	0.242099	0.999974
C1qc	498.438	0.109736	0.177023	0.619894	0.535328	0.999974
C1ql1	72.0786	0.0853989	0.247308	0.345313	0.729859	0.999974
C1qtnf1	490.189	-0.0447482	0.165149	-0.270957	0.786424	0.999974
C1qtnf2	212.277	-0.072978	0.150438	-0.485103	0.627603	0.999974
C1qtnf3	384.332	0.0968254	0.169548	0.571078	0.567947	0.999974
C1qtnf6	1253.38	-0.128041	0.0997286	-1.2839	0.199178	0.999974
C1qtnf7	35.4608	-0.107306	0.20141	-0.532774	0.59419	0.999974
C1qtnf9	59.7146	0.0776539	0.177577	0.437298	0.661895	0.999974
C1ra	562.427	-0.059755	0.0923477	-0.647065	0.51759	0.999974
C1s	1794.69	-0.0391137	0.122912	-0.318226	0.750314	0.999974
C2	136.594	-0.0904068	0.247531	-0.365235	0.714936	0.999974
C230052I12Rik	67.4912	-0.0996659	0.217814	-0.457574	0.647259	0.999974
C230081A13Rik	1119.7	-0.0583929	0.151885	-0.384455	0.700642	0.999974
C230091D08Rik	269.396	-0.0760646	0.121679	-0.625124	0.53189	0.999974
C2cd2	602.311	-0.00197596	0.0989774	-0.0199637	0.984072	0.999974
C2cd2l	937.901	0.28308	0.123481	2.2925	0.0218767	0.999974
C2cd3	485.757	0.016857	0.0942687	0.178819	0.85808	0.999974
C2cd4a	52.8912	0.0330637	0.249164	0.132699	0.894432	0.999974
C2cd4b	444.462	0.139474	0.315077	0.442665	0.658008	0.999974
C2cd5	428.181	-0.0424355	0.0763394	-0.55588	0.578293	0.999974
C3	1188.8	0.00289759	0.24447	0.0118525	0.990543	0.999974
C330006A16Rik	855.578	-0.15531	0.113672	-1.3663	0.171846	0.999974
C330007P06Rik	362.647	-0.132412	0.0723689	-1.82968	0.0672983	0.999974
C330018D20Rik	88.5091	-0.0197064	0.184341	-0.106902	0.914867	0.999974
C330027C09Rik	389.161	0.0861954	0.109165	0.78959	0.429768	0.999974
C3ar1	111.837	0.174219	0.218766	0.79637	0.425817	0.999974
C430049B03Rik	44.6836	-0.163409	0.237147	-0.689061	0.490785	0.999974
C4b	224.604	-0.011662	0.157564	-0.0740142	0.940999	0.999974
C4bp	69.5969	-0.209627	0.433954	-0.483062	0.629051	0.999974
C530008M17Rik	989.21	-0.0517893	0.141728	-0.365413	0.714803	0.999974
C5ar1	105.829	0.271831	0.259759	1.04647	0.295343	0.999974
C630043F03Rik	62.4278	-0.243626	0.276033	-0.882598	0.377454	0.999974
C77080	4601.7	0.160819	0.128571	1.25082	0.211001	0.999974
C77370	29.2814	0.110037	0.222243	0.49512	0.620516	0.999974
C78339	385.453	0.0261588	0.110684	0.236338	0.81317	0.999974
C87436	113.435	-0.0361012	0.123211	-0.293003	0.76952	0.999974
Caap1	129.804	-0.00394839	0.112497	-0.0350976	0.972002	0.999974
Cab39	4807.42	0.0770907	0.0963558	0.800062	0.423675	0.999974
Cab39l	641.128	-0.0789484	0.0725323	-1.08846	0.276393	0.999974
Cabin1	1117.08	-0.0614198	0.0958049	-0.641092	0.521463	0.999974
Cables1	343.537	0.261881	0.211301	1.23937	0.215207	0.999974
Cables2	412.041	0.0570765	0.071332	0.800153	0.423622	0.999974
Cabp1	27.7805	0.035705	0.220866	0.161659	0.871574	0.999974
Cacfd1	581.55	-0.113742	0.0764251	-1.48828	0.136677	0.999974
Cachd1	763.744	0.218523	0.129811	1.68339	0.0922995	0.999974
Cacna1a	128.049	0.205998	0.190709	1.08017	0.280068	0.999974
Cacna1b	167.459	0.133994	0.255111	0.525239	0.599417	0.999974
Cacna1c	908.008	0.0487149	0.175903	0.276942	0.781825	0.999974
Cacna1d	408.18	0.0810572	0.162134	0.499939	0.617118	0.999974
Cacna1e	477.364	-0.0358793	0.241674	-0.148462	0.881978	0.999974
Cacna1g	542.732	0.16177	0.117844	1.37275	0.16983	0.999974
Cacna1h	1573.86	0.0119125	0.142434	0.0836353	0.933346	0.999974
Cacna2d1	1684.96	0.0791985	0.118416	0.668817	0.503612	0.999974
Cacna2d2	102.55	-0.0560369	0.211909	-0.264439	0.791442	0.999974
Cacna2d3	84.9738	0.0835437	0.174667	0.478301	0.632436	0.999974
Cacnb1	195.165	0.237437	0.241009	0.985177	0.324537	0.999974
Cacnb2	197.322	0.147433	0.147655	0.998501	0.318037	0.999974
Cacnb3	1068.37	0.00894185	0.0921778	0.0970066	0.922721	0.999974
Cacnb4	62.4425	0.0686203	0.238732	0.287437	0.773778	0.999974
Cacng4	31.2122	-0.0526491	0.264564	-0.199003	0.84226	0.999974
Cacng7	174.437	0.0466363	0.128221	0.363718	0.716068	0.999974
Cactin	538.09	0.0251898	0.0722848	0.348479	0.72748	0.999974
Cacul1	1296.48	0.18194	0.112057	1.62365	0.104451	0.999974
Cacybp	1010.07	0.0121172	0.0793075	0.152787	0.878566	0.999974
Cad	635.272	-0.0852381	0.133153	-0.640154	0.522073	0.999974
Cadm1	469.273	0.0473899	0.126341	0.375095	0.70759	0.999974
Cadm2	29.6253	0.232518	0.385272	0.603516	0.546166	0.999974
Cadm3	506.248	0.0366702	0.234911	0.156103	0.875952	0.999974
Cadm4	302.912	-0.0635136	0.196932	-0.322515	0.747063	0.999974
Cadps	208.932	0.117774	0.221531	0.531638	0.594976	0.999974
Cadps2	616.331	-0.0662562	0.130956	-0.505942	0.612897	0.999974
Calb2	813.316	0.09037	0.224642	0.402285	0.687475	0.999974
Calca	25.3093	-0.178153	0.274838	-0.648213	0.516847	0.999974
Calcb	153.191	0.139681	0.315459	0.442788	0.657919	0.999974
Calcoco1	587.011	-0.104681	0.0864429	-1.21098	0.225902	0.999974
Calcrl	955.266	0.0583891	0.109271	0.53435	0.5931	0.999974
Cald1	12648	0.0508352	0.15793	0.321885	0.74754	0.999974
Calhm2	41.3065	-0.326252	0.305272	-1.06873	0.285193	0.999974
Calm1	14493.2	0.0595242	0.0613919	0.969578	0.332257	0.999974
Calm2	8084.87	0.0765213	0.0677138	1.13007	0.258447	0.999974
Calm3	6701.35	-0.0448652	0.0734441	-0.610876	0.541281	0.999974
Calml4	1472.91	-0.0248396	0.089712	-0.276882	0.781871	0.999974
Calr	14218.3	0.0431082	0.0753714	0.571944	0.56736	0.999974
Calu	9474.19	0.0815432	0.0818251	0.996555	0.318981	0.999974
Caly	45.1864	0.421778	0.376071	1.12154	0.262058	0.999974
Camk1	702.185	0.018695	0.0803247	0.232743	0.815961	0.999974
Camk1d	2261.46	-0.0102066	0.101972	-0.100092	0.920271	0.999974
Camk2a	153.359	-0.0855158	0.183743	-0.46541	0.641638	0.999974
Camk2b	349.125	0.00812433	0.146454	0.0554737	0.955761	0.999974
Camk2d	2214.28	0.0601438	0.0795679	0.755881	0.449721	0.999974
Camk2g	2060.41	-0.103587	0.160289	-0.646251	0.518117	0.999974
Camk2n1	2262.3	0.132917	0.0655372	2.02812	0.0425484	0.999974
Camk2n2	100.081	-0.0934688	0.252267	-0.370515	0.710999	0.999974
Camk4	164.636	0.310091	0.173414	1.78815	0.0737513	0.999974
Camkk1	211.199	-0.0325671	0.164585	-0.197874	0.843144	0.999974
Camkk2	362.66	-0.445753	0.19727	-2.25961	0.0238456	0.999974
Camkmt	134.355	-0.140268	0.107559	-1.3041	0.1922	0.999974
Caml	320.124	0.0050072	0.0982426	0.0509677	0.959351	0.999974
Camsap1	895.322	0.215373	0.136613	1.57652	0.114907	0.999974
Camsap2	1113.08	0.265178	0.16389	1.61802	0.105657	0.999974
Camsap3	1285.19	0.148974	0.15205	0.979773	0.327198	0.999974
Camta1	313.968	0.097931	0.154528	0.633742	0.526249	0.999974
Camta2	1324.07	0.0224898	0.0793194	0.283535	0.776767	0.999974
Cand1	2280.57	0.135369	0.0848311	1.59574	0.110546	0.999974
Cand2	90.6936	-0.116831	0.20177	-0.579029	0.562569	0.999974
Cant1	2404.08	0.00848364	0.0726645	0.116751	0.907058	0.999974
Canx	7142.57	0.051827	0.065504	0.791203	0.428825	0.999974
Cap1	5498.08	0.0330484	0.0730527	0.452391	0.650987	0.999974
Cap2	565.288	0.0839832	0.177013	0.474445	0.635183	0.999974
Capg	523.675	-0.111237	0.145416	-0.764953	0.4443	0.999974
Capn1	2802.14	-0.00735204	0.0926116	-0.0793857	0.936726	0.999974
Capn10	185.611	-0.0999446	0.132685	-0.753248	0.451301	0.999974
Capn13	151.766	0.0625915	0.259573	0.241132	0.809452	0.999974
Capn2	3701.54	0.0820351	0.0898222	0.913305	0.361082	0.999974
Capn5	1530.52	0.0369777	0.173792	0.21277	0.831507	0.999974
Capn6	104.776	-0.0204054	0.149404	-0.136578	0.891364	0.999974
Capn7	879.207	0.0940659	0.0916468	1.0264	0.304705	0.999974
Capn8	135.617	-0.173234	0.168716	-1.02678	0.304524	0.999974
Capn9	324.423	0.00285159	0.248669	0.0114674	0.990851	0.999974
Capns1	5563.17	0.0145074	0.0689403	0.210434	0.833329	0.999974
Caprin1	5012.65	0.00959891	0.0716805	0.133913	0.893472	0.999974
Caprin2	115.539	-0.10654	0.156223	-0.681977	0.495254	0.999974
Capsl	24.7026	-0.24112	0.248938	-0.968598	0.332746	0.999974
Capza1	972.498	0.0445611	0.0958841	0.464739	0.642118	0.999974
Capza2	3681.45	0.110305	0.0880146	1.25326	0.21011	0.999974
Capzb	5065.16	0.0821874	0.0613887	1.3388	0.180634	0.999974
Car1	8312.69	0.262986	0.763651	0.34438	0.73056	0.999974
Car11	56.7128	0.0191127	0.290992	0.0656811	0.947632	0.999974
Car12	843.346	0.0297706	0.14759	0.201712	0.840142	0.999974
Car13	648.049	-0.144397	0.0999017	-1.44539	0.14835	0.999974
Car2	9186.93	-0.0359265	0.243422	-0.14759	0.882667	0.999974
Car3	128.122	0.199783	0.562973	0.35487	0.722687	0.999974
Car4	467.345	-0.895813	0.894226	-1.00177	0.316453	0.999974
Car5b	33.8794	0.0374853	0.251787	0.148877	0.881651	0.999974
Car8	1563.74	0.0317908	0.117682	0.270142	0.787051	0.999974
Car9	536.033	-0.126266	0.146155	-0.863918	0.387633	0.999974
Card10	728.109	0.0303452	0.0996703	0.304456	0.76078	0.999974
Card11	84.0778	0.0494099	0.306054	0.161442	0.871745	0.999974
Card14	280.611	0.232214	0.244255	0.950703	0.341755	0.999974
Card6	61.8998	-0.0122062	0.167771	-0.0727553	0.942001	0.999974
Carf	37.4695	0.007872	0.214989	0.0366159	0.970791	0.999974
Carhsp1	2241.43	0.0608304	0.0774074	0.785847	0.431957	0.999974
Carkd	572.906	-0.0690827	0.0823726	-0.838661	0.40166	0.999974
Carm1	1072.23	-0.0768425	0.0705522	-1.08916	0.276084	0.999974
Carns1	37.5666	0.0928894	0.221362	0.419627	0.674758	0.999974
Cars	1097.76	0.0571268	0.109103	0.523605	0.600553	0.999974
Cars2	216.395	-0.0648362	0.114882	-0.564373	0.572501	0.999974
Cartpt	110.708	0.212731	0.360485	0.590123	0.555109	0.999974
Casc3	1041.87	0.00813553	0.0532777	0.1527	0.878634	0.999974
Casc4	900.02	-0.0260544	0.0684678	-0.380535	0.703548	0.999974
Casc5	161.311	-0.0752099	0.19814	-0.37958	0.704257	0.999974
Casd1	723.236	-0.0193649	0.0908253	-0.213211	0.831163	0.999974
Cask	1231.18	0.0447514	0.0969628	0.461531	0.644417	0.999974
Caskin1	137.725	0.125957	0.212296	0.593309	0.552974	0.999974
Caskin2	1680.4	0.112026	0.0844601	1.32638	0.184713	0.999974
Casp1	1368.91	-0.0433886	0.111672	-0.388537	0.697619	0.999974
Casp12	301.712	-0.12614	0.118878	-1.06108	0.288653	0.999974
Casp2	1065.65	-0.19588	0.117899	-1.66142	0.0966288	0.999974
Casp3	740.982	0.124304	0.116167	1.07004	0.284599	0.999974
Casp4	596.536	0.0484549	0.137141	0.353322	0.723847	0.999974
Casp6	475.833	-0.00900711	0.0950726	-0.0947392	0.924522	0.999974
Casp7	1528.93	-0.0389274	0.108062	-0.360231	0.718675	0.999974
Casp8	1785.07	0.0695453	0.174644	0.398212	0.690474	0.999974
Casp8ap2	328.438	-0.00639907	0.0917136	-0.0697723	0.944375	0.999974
Casp9	438.156	-0.22419	0.110262	-2.03326	0.0420266	0.999974
Casq1	49.7131	0.29128	0.276748	1.05251	0.292566	0.999974
Casq2	75.6999	0.0494827	0.323914	0.152765	0.878584	0.999974
Cass4	26.9938	0.150659	0.223932	0.672789	0.501081	0.999974
Cast	2437.39	0.130301	0.120668	1.07983	0.28022	0.999974
Casz1	1125.65	0.149835	0.175509	0.853721	0.393259	0.999974
Cat	2199.34	0.0119066	0.171397	0.069468	0.944617	0.999974
Cav1	7028.27	-0.0481941	0.114822	-0.419728	0.674684	0.999974
Cav2	817.382	-0.0811637	0.134134	-0.605092	0.545118	0.999974
Cav3	115.653	0.114669	0.214966	0.533432	0.593735	0.999974
Cbfa2t2	530.696	0.0502412	0.0798034	0.629561	0.528982	0.999974
Cbfa2t3	351.204	0.0374951	0.160815	0.233156	0.81564	0.999974
Cbfb	1019.42	0.0341797	0.0814621	0.419578	0.674794	0.999974
Cbl	562.559	0.0619319	0.210404	0.294347	0.768492	0.999974
Cblb	724.982	0.207369	0.14104	1.47028	0.141486	0.999974
Cblc	698.188	0.0135303	0.138694	0.0975551	0.922286	0.999974
Cbll1	283.193	-0.0183784	0.102845	-0.1787	0.858173	0.999974
Cbln2	62.3885	0.188865	0.409252	0.461489	0.644448	0.999974
Cbln3	31.1976	0.0106229	0.224563	0.047305	0.96227	0.999974
Cbln4	26.9083	-0.234803	0.253586	-0.925932	0.354481	0.999974
Cbr1	2190.33	0.019689	0.12693	0.155117	0.876729	0.999974
Cbr2	91.5133	0.0183672	0.238422	0.0770365	0.938594	0.999974
Cbr3	440.117	-0.116681	0.190315	-0.613094	0.539814	0.999974
Cbr4	148.515	-0.0819958	0.118601	-0.69136	0.489339	0.999974
Cbs	643.164	-0.0407694	0.18962	-0.215006	0.829763	0.999974
Cbwd1	163.023	0.095257	0.10485	0.908509	0.363609	0.999974
Cbx1	483.787	0.0110813	0.0881024	0.125778	0.899908	0.999974
Cbx2	83.0167	-0.0137429	0.152048	-0.0903851	0.927981	0.999974
Cbx3	258.92	-0.0909684	0.0849455	-1.0709	0.284213	0.999974
Cbx4	562.599	0.134491	0.0869505	1.54675	0.121922	0.999974
Cbx5	1563.17	-0.184355	0.126664	-1.45546	0.145543	0.999974
Cbx6	1659.38	-0.0793168	0.156718	-0.506111	0.612778	0.999974
Cbx7	207.619	-0.045773	0.10902	-0.41986	0.674588	0.999974
Cbx8	48.1478	-0.105305	0.175046	-0.601588	0.547448	0.999974
Cby1	165.712	-0.00403063	0.143399	-0.0281079	0.977576	0.999974
Cc2d1a	682.122	-0.0371103	0.0673151	-0.551293	0.581433	0.999974
Cc2d1b	588.32	-0.0399789	0.0668978	-0.597611	0.550099	0.999974
Cc2d2a	257.39	0.0120504	0.103615	0.116299	0.907416	0.999974
Ccar1	1623.1	0.0454888	0.0803745	0.565961	0.57142	0.999974
Ccbe1	112.834	-0.128125	0.225447	-0.568315	0.569821	0.999974
Ccbl1	203.497	-0.00663684	0.10637	-0.0623939	0.950249	0.999974
Ccbl2	64.2535	-0.0694124	0.200672	-0.345899	0.729419	0.999974
Ccbp2	42.7491	-0.171496	0.254817	-0.673015	0.500938	0.999974
Ccdc101	371.818	-0.100822	0.113224	-0.890468	0.373215	0.999974
Ccdc102a	323.429	0.220856	0.150515	1.46734	0.142284	0.999974
Ccdc104	392.364	0.0793121	0.0993192	0.798557	0.424547	0.999974
Ccdc106	69.1754	-0.0452471	0.203714	-0.222112	0.824227	0.999974
Ccdc107	599.891	0.02833	0.0915251	0.309533	0.756916	0.999974
Ccdc109b	129.995	-0.0848513	0.215824	-0.393151	0.694208	0.999974
Ccdc111	109.465	-0.00187528	0.157589	-0.0118998	0.990506	0.999974
Ccdc112	85.5149	-0.0169248	0.138989	-0.121771	0.90308	0.999974
Ccdc114	44.7924	-0.157554	0.231542	-0.680453	0.496217	0.999974
Ccdc115	331.687	-0.0882699	0.0902451	-0.978113	0.328018	0.999974
Ccdc116	113.507	0.0440951	0.211841	0.208152	0.83511	0.999974
Ccdc117	610.197	0.173179	0.110991	1.5603	0.118689	0.999974
Ccdc12	634.884	0.0220371	0.0900825	0.244632	0.806741	0.999974
Ccdc120	380.204	0.203542	0.144391	1.40965	0.158642	0.999974
[truncated: 11,571 more rows]
